# Supplementary material for: Rapid rise in atmospheric CO2 marked the end of the Late Palaeozoic Ice Age
Source: Nat Geosci. 2025 Jan 6;18(1):91–7. doi: 10.1038/s41561-024-01610-2 (PMC11732749; doi:10.1038/s41561-024-01610-2)
Supplement: Supplementary file 2 — Carboniferous–Permian δ11B, 87Sr/86Sr, δ13C and δ18O data compilation. [file 41561_2024_1610_MOESM2_ESM.xlsx]

## Sheet: data all
Supplementary Data to Jurikova et al. 'Rapid rise in atmospheric CO2 marked the end of the Late Palaeozoic Ice Age'. Data S1 Carboniferous-Permian geochemical data compilation. New and previously published, updated, brachiopod C, O, Sr and B.
Horizon	Number	Sample	Stage	Formation	Country	Age_Ma (from stratigraphic position)	Age_Ma (from Sr model)	Age_90 confidence interval	Age_Ma combined (preferred Sr, where unavailable using stratigraphy)	Age_90 confidence interval	Species	Author_d11B	d11B	d11B_2SD	d11B_borate	Author_all data/other data	Sr87_orig = original 87Sr/86Sr reported	Sr87_corr = 87Sr/86Sr corrected to NIST SRM987 (in particular older data were off)	SD	d13C	d18O	Notes
8	106	30AO2B/30AO2-Sr	late Visean	Pathhead Fm.	UK		334.29	0.36	334.29	0.36	?Orthida	This study	16.7373	0.2	15.0533	This study	0.707971	0.707971	1.5e-05
8	107	30AO1-Sr-3	late Visean	Pathhead Fm.	UK		334.29	0.36	334.29	0.36	?Orthida	This study				This study	0.707947	0.707947	1.6e-05
8	108	30AO2/30AO21	late Visean	Pathhead Fm.	UK		334.29	0.36	334.29	0.36	?Orthida	This study	16.4183	0.2	14.6408	This study	0.707972	0.707972	1.52726e-05
8	109	30AO22	late Visean	Pathhead Fm.	UK		334.29	0.36	334.29	0.36	?Orthida	This study	16.57	0.2	14.837	This study
8	110	30AP11	late Visean	Pathhead Fm.	UK		334.29	0.36	334.29	0.36	Productus	This study	15.5528	0.2	13.5219	This study	0.707895	0.707895	1.64292e-05
8	111	30AP1-Sr	late Visean	Pathhead Fm.	UK		334.29	0.36	334.29	0.36	Productus	This study				This study	0.707894	0.707894	1.6e-05
8	112	30AC2-Sr	late Visean	Pathhead Fm.	UK		334.29	0.36	334.29	0.36	Camarotoechia	This study				This study	0.707917	0.707917	1.6e-05
8	113	30AC1-Sr-4	late Visean	Pathhead Fm.	UK		334.29	0.36	334.29	0.36	Camarotoechia	This study				This study	0.707984	0.707984	1.6e-05
8	114	30AO1-Sr	late Visean	Pathhead Fm.	UK		334.29	0.36	334.29	0.36	?Orthida	This study				This study	0.707948	0.707948	1.62712e-05
8	115	30AC1-Sr	late Visean	Pathhead Fm.	UK		334.29	0.36	334.29	0.36	Camarotoechia	This study				This study	0.707985	0.707985	1.6014e-05
8	116	30AC2-Sr	late Visean	Pathhead Fm.	UK		334.29	0.36	334.29	0.36	Camarotoechia	This study				This study	0.707918	0.707918	1.59472e-05
8	117	30AT1-Sr	late Visean	Pathhead Fm.	UK		334.29	0.36	334.29	0.36	Terebratulida	This study				This study	0.708127	0.708127	1.436e-05
8	118	30AT1-Sr	late Visean	Pathhead Fm.	UK		334.29	0.36	334.29	0.36	Terebratulida	This study				This study	0.708133	0.708133	1.59622e-05
8	119	TR1.1	late Visean	Pathhead Fm.	UK		334.29	0.36	334.29	0.36	Productus	This study	16.3845	0.2	14.5972	This study
8	120	TR1.2	late Visean	Pathhead Fm.	UK		334.29	0.36	334.29	0.36	Productus	This study	16.3267	0.2	14.5224	This study	0.707884	0.707884	2.37475e-05
8	121	TR1.3	late Visean	Pathhead Fm.	UK		334.29	0.36	334.29	0.36	Productus	This study	16.2683	0.2	14.4469	This study	0.707892	0.707892	2.13432e-05
7	122	TR2.6	late Visean	Pathhead Fm.	UK		333.61	0.45	333.61	0.45	Rhynchonella	This study				This study	0.707848	0.707848	2.88929e-05
7	123	TR2.7	late Visean	Pathhead Fm.	UK		333.61	0.45	333.61	0.45	Productus	This study	16.2516	0.2	14.4253	This study	0.707827	0.707827	2.13437e-05
7	123b	TR2.7	late Visean	Pathhead Fm.	UK		333.61	0.45	333.61	0.45	Productus	This study	16.1282	0.2	14.2658	This study
7	124	TR2.16	late Visean	Pathhead Fm.	UK		333.61	0.45	333.61	0.45	Rhynchonella	This study				This study	0.707836	0.707836	2.23174e-05
7	125	TR2.11	late Visean	Pathhead Fm.	UK		333.61	0.45	333.61	0.45	Rhynchonella	This study				This study
7	126	TR2.15	late Visean	Pathhead Fm.	UK		333.61	0.45	333.61	0.45		This study				This study
7	127	TR2.3	late Visean	Lower Limestone Fm.	UK		333.61	0.45	333.61	0.45	Strophomenida	This study				This study
7	128	TR2.8	late Visean	Lower Limestone Fm.	UK		333.61	0.45	333.61	0.45	Rhynchonella	This study				This study
7	129	TR2.14	late Visean	Lower Limestone Fm.	UK		333.61	0.45	333.61	0.45	Rhynchonella	This study				This study
7	129b	TR2.14	late Visean	Lower Limestone Fm.	UK		333.61	0.45	333.61	0.45	Rhynchonella	This study				This study
7	130	TR2.17	late Visean	Lower Limestone Fm.	UK		333.61	0.45	333.61	0.45	?Streptorhynchus	This study				This study
6	131	TR3.1	late Visean	Lower Limestone Fm.	UK		332.9	0.49	332.9	0.49	Productus	This study	16.4737	0.2	14.7125	This study	0.707857	0.707857	2.31183e-05
6	131b	TR3.1A	late Visean	Lower Limestone Fm.	UK		332.9	0.49	332.9	0.49	Productus	This study	16.4939	0.2	14.7386	This study
6	132	TR3.7	late Visean	Lower Limestone Fm.	UK		332.9	0.49	332.9	0.49	Productus	This study	15.8104	0.2	13.8549	This study
6	133	TR3.9	late Visean	Lower Limestone Fm.	UK		332.9	0.49	332.9	0.49	Productus	This study	16.2979	0.2	14.4852	This study	0.707862	0.707862	2.17069e-05
6	134	TR3.10	late Visean	Lower Limestone Fm.	UK		332.9	0.49	332.9	0.49	Productus	This study	16.0981	0.2	14.227	This study
6	135	TR3.6	late Visean	Lower Limestone Fm.	UK		332.9	0.49	332.9	0.49	Productus	This study	15.9322	0.2	14.0124	This study
6	135b	TR3.6	late Visean	Lower Limestone Fm.	UK		332.9	0.49	332.9	0.49	Productus	This study	16.2387	0.2	14.4086	This study
6	286	6.1_1A	late Visean	Lower Limestone Fm., Kinghorn-Kirkcaldy, First Abden	UK		332.9	0.49	332.9	0.49		This study				This study	0.707818	0.707818	1.47595e-05
6	287	7.1_2A	late Visean	Lower Limestone Fm., Kinghorn-Kirkcaldy, Second Abden	UK		332.9	0.49	332.9	0.49		This study	15.5932	0.2	13.5741	This study
6	288	9.1_1A	late Visean	Lower Limestone Fm., Kinghorn-Kirkcaldy, First Abden	UK		332.9	0.49	332.9	0.49		This study	16.6739	0.2	14.9713	This study
6	289	9.2_1A	late Visean	Lower Limestone Fm., Kinghorn-Kirkcaldy, First Abden	UK		332.9	0.49	332.9	0.49		This study				This study
6	290	10.1_2A	late Visean	Lower Limestone Fm., Kinghorn-Kirkcaldy, Second Abden	UK		332.9	0.49	332.9	0.49		This study	15.8379	0.2	13.8905	This study
6	291	10.2_2A	late Visean	Lower Limestone Fm., Kinghorn-Kirkcaldy, Second Abden	UK		332.9	0.49	332.9	0.49		This study				This study
6	292	10.3_2A	late Visean	Lower Limestone Fm., Kinghorn-Kirkcaldy, Second Abden	UK		332.9	0.49	332.9	0.49		This study				This study	0.707869	0.707869	1.48214e-05
6	293	10.4_2A	late Visean	Lower Limestone Fm., Kinghorn-Kirkcaldy, Second Abden	UK		332.9	0.49	332.9	0.49		This study				This study
6	294	11.1_2A	late Visean	Lower Limestone Fm., Kinghorn-Kirkcaldy, Second Abden	UK		332.9	0.49	332.9	0.49		This study	16.7406	0.2	15.0575	This study
6	295	11.2_2A	late Visean	Lower Limestone Fm., Kinghorn-Kirkcaldy, Second Abden	UK		332.9	0.49	332.9	0.49		This study				This study
6	296	11.3_2A	late Visean	Lower Limestone Fm., Kinghorn-Kirkcaldy, Second Abden	UK		332.9	0.49	332.9	0.49		This study				This study
6	297	11.4_2A	late Visean	Lower Limestone Fm., Kinghorn-Kirkcaldy, Second Abden	UK		332.9	0.49	332.9	0.49		This study				This study
6	298	12_2A	late Visean	Lower Limestone Fm., Kinghorn-Kirkcaldy, Second Abden	UK		332.9	0.49	332.9	0.49		This study				This study	0.707799	0.707799	1.60003e-05
6	299	15_2AK	late Visean	Lower Limestone Fm., Kinghorn-Kirkcaldy, Second Abden	UK		332.9	0.49	332.9	0.49		This study				This study
IBL	12	IB001	late Visean	Ible	UK		332.455	0.248865	332.455	0.248865	Latibrachythyris cf. crassa	This study	18.6182	0.2	17.4849	Angiolini et a. 2011	0.707817	0.707817	1.5e-05
IBL	13	IB060	late Visean	Ible	UK		332.455	0.248865	332.455	0.248865	Gigantoproductus okensis	This study				Angiolini et a. 2011	0.707834	0.707834	1.4e-05
IBL	14	IBL115	late Visean	Ible	UK		332.455	0.248865	332.455	0.248865	Latibrachythyris cf. crassa	This study	18.325	0.2	17.1058	Angiolini et a. 2011	0.707822	0.707822	1.4e-05
IBL	15	IBL116	late Visean	Ible	UK		332.455	0.248865	332.455	0.248865	Latibrachythyris cf. crassa	This study	16.184	0.2	14.3379	Angiolini et a. 2011	0.707832	0.707832	1.5e-05
IBL	16	IBL122	late Visean	Ible	UK		332.455	0.248865	332.455	0.248865	Latibrachythyris cf. crassa	This study	16.3572	0.2	14.5619	This study	0.707821	0.707821	1.5e-05	2.88058	-1.87654
IBL	16b	IBL122	late Visean	Ible	UK		332.455	0.248865	332.455	0.248865	Latibrachythyris cf. crassa	This study				This study				2.22006	-4.19772
IBL	17	IBL122	late Visean	Ible	UK		332.455	0.248865	332.455	0.248865	Latibrachythyris cf. crassa	This study				This study
IBL			late Visean	Ible	UK		332.454	0.255404	332.454	0.255404	Gigantoproductus okensis					Angiolini et al. 2011				-0.81	-5.45
4	138	TR5.3	late Visean	Lower Limestone Fm.	UK		332.23	0.46	332.23	0.46	Productus	This study	16.5616	0.2	14.8261	This study	0.707888	0.707888	2.16638e-05
4	139	TR5.1	late Visean	Lower Limestone Fm.	UK		332.23	0.46	332.23	0.46	Productus	This study	16.2041	0.2	14.364	This study
4	140	TR5.2	late Visean	Lower Limestone Fm.	UK		332.23	0.46	332.23	0.46	Productus	This study	16.6905	0.2	14.9928	This study
4	141	TR5.4	late Visean	Lower Limestone Fm.	UK		332.23	0.46	332.23	0.46	Productus	This study	16.4842	0.2	14.726	This study
OAW	7	OAW23-1	late Visean	Once a week	UK		331.934	0.289523	331.934	0.289523	Gigantoproductus elongatus	This study	16.1884	0.2	14.3437	Angiolini et al. 2019	0.707904	0.707904	1.5e-05
OAW	8	OAW23-2	late Visean	Once a week	UK		331.934	0.289523	331.934	0.289523	Gigantoproductus elongatus	This study				Angiolini et al. 2019	0.707844	0.707844	1.4e-05
OAW	9	OAW23-3	late Visean	Once a week	UK		331.934	0.289523	331.934	0.289523	Gigantoproductus elongatus	This study				Angiolini et al. 2019	0.707875	0.707875	1.5e-05
OAW	10	OAW203-1	late Visean	Once a week	UK		331.934	0.289523	331.934	0.289523	Gigantoproductus elongatus	This study	16.67	0.2	14.9662	Angiolini et al. 2019	0.707858	0.707858	1.6e-05	1.5	-4.3
OAW	11	OAW203-2	late Visean	Once a week	UK		331.934	0.289523	331.934	0.289523	Gigantoproductus elongatus	This study				Angiolini et al. 2019	0.707856	0.707856	1.5e-05
OAW		OAW3	late Visean	Ricklow	UK		331.919	0.298992	331.919	0.298992	Gigantoproductus inflatus					Angiolini et al. 2019				0.8	-4.6
OAW		OAW212	late Visean	Once a week	UK		331.919	0.298992	331.919	0.298992	Gigantoproductus inflatus					Angiolini et al. 2019				1.4	-4.7
3	272	3.2_BS	late Visean	Lower Limestone Fm., Fife Quarries, Roscobie	UK		331.56	0.35	331.56	0.35		This study	16.2942	0.2	14.4804	This study	0.707879	0.707879	1.50114e-05
3	273	3.2_WP	late Visean	Lower Limestone Fm., Fife Quarries, Roscobie	UK		331.56	0.35	331.56	0.35		This study				This study
3	274	3.2_FL	late Visean	Lower Limestone Fm., Fife Quarries, Roscobie	UK		331.56	0.35	331.56	0.35		This study				This study
3	275	3.3SR	late Visean	Lower Limestone Fm., Fife Quarries, Roscobie	UK		331.56	0.35	331.56	0.35		This study	16.4165	0.2	14.6385	This study	0.707901	0.707901	1.39955e-05
3	276	3.3.4R	late Visean	Lower Limestone Fm., Fife Quarries, Roscobie	UK		331.56	0.35	331.56	0.35		This study	16.4187	0.2	14.6414	This study
3	277	5.1_1H1	late Visean	Lower Limestone Fm., Ayrshire Quarries, Hessilhead	UK		331.56	0.35	331.56	0.35		This study	16.4283	0.2	14.6538	This study
3	278	5.1_1H2	late Visean	Lower Limestone Fm., Ayrshire Quarries, Hessilhead	UK		331.56	0.35	331.56	0.35		This study				This study
3	279	5.1_2H	late Visean	Lower Limestone Fm., Ayrshire Quarries, Hessilhead	UK		331.56	0.35	331.56	0.35		This study	16.4611	0.2	14.6962	This study	0.707851	0.707851	1.5323e-05
3	280	5.1_3H	late Visean	Lower Limestone Fm., Ayrshire Quarries, Hessilhead	UK		331.56	0.35	331.56	0.35		This study				This study
3	281	5.1_7H	late Visean	Lower Limestone Fm., Ayrshire Quarries, Hessilhead	UK		331.56	0.35	331.56	0.35		This study				This study
3	282	5.1_8H	late Visean	Lower Limestone Fm., Ayrshire Quarries, Hessilhead	UK		331.56	0.35	331.56	0.35		This study				This study	0.70785	0.70785	1.53566e-05
3	283	5.1_9H	late Visean	Lower Limestone Fm., Ayrshire Quarries, Hessilhead	UK		331.56	0.35	331.56	0.35		This study				This study
3	284	5.2_T1	late Visean	Lower Limestone Fm., Ayrshire Quarries, Trearne	UK		331.56	0.35	331.56	0.35		This study				This study	0.707853	0.707853	1.46368e-05
3	285	5.2_T2	late Visean	Lower Limestone Fm., Ayrshire Quarries, Trearne	UK		331.56	0.35	331.56	0.35		This study				This study
RCK	1	RCK21b	late Visean	Ricklow	UK		331.431	0.252874	331.431	0.252874	Angiospirifer sp.	This study	16.784	0.2	15.1137	Angiolini et al. 2019	0.70782	0.70782	1.4e-05
RCK	2	RCK28	late Visean	Ricklow	UK		331.431	0.252874	331.431	0.252874	Gigantoproductus inflatus	This study	17.3751	0.2	15.8778	Angiolini et al. 2019	0.707849	0.707849	2.44468e-05	3.4131	-2.98667
RCK	3	RCK28	late Visean	Ricklow	UK		331.431	0.252874	331.431	0.252874	Gigantoproductus inflatus	This study	17.4967	0.2	16.035	Angiolini et al. 2019	0.707849	0.707849	1.5e-05
RCK	4	RCK42c	late Visean	Ricklow	UK		331.431	0.252874	331.431	0.252874	Angiospirifer sp.	This study	17.4927	0.2	16.0299	Angiolini et al. 2019	0.707861	0.707861	1.18633e-05	3.41067	-3.45091
RCK	5	RCK42c	late Visean	Ricklow	UK		331.431	0.252874	331.431	0.252874	Angiospirifer sp.	This study				Angiolini et al. 2019	0.707851	0.707851	1.6e-05
RCK	6	RCK221	late Visean	Ricklow	UK		331.431	0.252874	331.431	0.252874	Gigantoproductus inflatus	This study	16.6571	0.2	14.9495	Angiolini et al. 2019	0.707854	0.707854	1.6e-05	1.9	-3.8
RCK		RCK16	late Visean	Ricklow	UK		331.395	0.252874	331.395	0.252874	Gigantoproductus okensis					Angiolini et al. 2019				2.3	-4.1
RCK		RCK33	late Visean	Ricklow	UK		331.395	0.252874	331.395	0.252874	Gigantoproductus inflatus					Angiolini et al. 2019				2	-4.3
RCK		RCK35	late Visean	Ricklow	UK		331.395	0.252874	331.395	0.252874	Gigantoproductus inflatus					Angiolini et al. 2019				1.6	-4.7
RCK		RCK36	late Visean	Ricklow	UK		331.395	0.252874	331.395	0.252874	Gigantoproductus okensis					Angiolini et al. 2019				1.7	-3.9
RCK		RCK41	late Visean	Ricklow	UK		331.395	0.252874	331.395	0.252874	Gigantoproductus inflatus					Angiolini et al. 2019				2.4	-3.5
RCK		RCK16	late Visean	Ricklow	UK		331.395	0.252874	331.395	0.252874	Gigantoproductus okensis					Angiolini et al. 2019				2.6	-3.4
CAR	65	CAR5-3	upper Visean-Serpukhovian age	Tonka Fm., Carlin Canyon, Nevada	USA	330.9			330.9		Marginatia sp	This study	15.8458	0.2	13.9007	This study	0.707691	0.707691	8.71058e-06	2.27767	-2.25778
CAR	66	CAR5-26	upper Visean-Serpukhovian age	Tonka Fm., Carlin Canyon, Nevada	USA	330.9			330.9		Anthracospirifer shawi shawi	This study	15.6282	0.2	13.6194	This study	0.707708	0.707708	7.89983e-06	2.36615	-2.19103
IR501-8	Ptextended-261	IR501-8	Serpukhovian	Dozdehband	Iran	330-327	328.505	0.529807	328.505	0.529807	Frechella sp.	This study	15.8717	0.2	13.9342	This study	0.707891	0.707891	1.10622e-05	2.74874	-0.8038
IR502-1	Ptextended-266	IR502-1	Serpukhovian	Dozdehband	Iran	330-327	328.505	0.529807	328.505	0.529807	?Frechella sp.	This study	14.5385	0.2	12.2105	This study	0.707902	0.707902	9.14312e-06
IR502-33	Ptextended-267	IR502-33	Serpukhovian	Dozdehband	Iran	330-327	328.505	0.529807	328.505	0.529807	Echinoconchus sp.	This study	17.8864	0.2	16.5389	This study	0.707936	0.707936	1.48782e-05
IR502-24	Ptextended-268	IR502-24	Serpukhovian	Dozdehband	Iran	330-327	328.505	0.529807	328.505	0.529807	Echinoconchus sp.	This study	16.0262	0.2	14.1339	This study	0.707933	0.707933	8.51812e-06
IR502-20	Ptextended-269	IR502-20	Serpukhovian	Dozdehband	Iran	330-327	328.505	0.529807	328.505	0.529807	Frechella sp.	This study	13.9287	0.2	11.4222	This study	0.707922	0.707922	9.36093e-06	2.12499	-2.71014
IR501-9	Ptextended-270	IR501-9	Serpukhovian	Dozdehband	Iran	330-327	328.505	0.529807	328.505	0.529807	?Rhynchotetra sp.	This study	16.3932	0.2	14.6085	This study	0.707877	0.707877	9.92741e-06	2.22446	-0.87732
307		307	Krasnopol.	Moscow Basin	Russia		321.212	0.178191	321.212	0.178191	Choristites					Veizer et al. 1999 (original dataset)	0.708219	0.708226		5.6	-0.9
323		323	Krasnopoly.	Moscow Basin	Russia		321.212	0.178191	321.212	0.178191	Choristites					Veizer et al. 1999 (original dataset)	0.708222	0.708229		5.3	-0.8
846		846	Carboniferous			320.2			320.2		Composita subquadratica	Legett et al. (2020)	11.45	3	8.21771	Legett et al. 2020				2.05	-0.61	discarded previously
847		847	Carboniferous			320.2			320.2		Composita subquadratica	Legett et al. (2020)	14.3	1.5	11.9023	Legett et al. 2020				2.02	-0.76
880		880	Carboniferous			319.5			319.5		Anthracospirifer increbescens	Legett et al. (2020)	6.9	3	2.33536	Legett et al. 2020				2.74	-4.05	discarded previously, discarded again
NL-1		E-158-NL-1	Bashkirian	Spain, Prov. Leon	Spain		319.406	1.53407	319.406	1.53407	Choristites sp.					Popp et al. 1986	0.708168	0.708275	2.6e-05	6.12	-2.09	Questionable
NL-1		E-166-NL-1	Bashkirian	Spain, Prov. Leon	Spain		319.406	1.53407	319.406	1.53407	Choristites sp.					Popp et al. 1986	0.708193	0.7083	2.6e-05	5.84	-2.21	Questionable
115A		115A	L-Cheremshan.	Donezk			316.9	0.106899	316.9	0.106899						Veizer et al. 1999 (original dataset)	0.708286	0.708293		4.1	-4.4	Dubious d18O
113A		113A	L-Cheremshan.	Donezk			316.9	0.106899	316.9	0.106899						Veizer et al. 1999 (original dataset)	0.70825	0.708257		4.3	-2.3
119B		119B	L-Cheremshan.	Donezk			316.9	0.106899	316.9	0.106899						Veizer et al. 1999 (original dataset)	0.708246	0.708253		5.1	-1.9
125A		125A	L-Cheremshan.	Donezk			316.9	0.106899	316.9	0.106899						Veizer et al. 1999 (original dataset)	0.708229	0.708236		4.5	-1.7
145A		145A	L-Cheremshan.	Donezk			316.9	0.106899	316.9	0.106899						Veizer et al. 1999 (original dataset)	0.708235	0.708242		5.2	-7.2	Anomalous d18O
306		306	Cheremshan.	Moscow Basin	Russia		316.598	0.213462	316.598	0.213462	Choristites					Veizer et al. 1999 (original dataset)	0.708234	0.708241		5.3	-1.3
310		310	Cheremshan.	Moscow Basin	Russia		316.598	0.213462	316.598	0.213462	Choristites					Veizer et al. 1999 (original dataset)	0.708239	0.708246		5.3	-1.4
136B		136B	Melekesskian	Donezk			315.555	0.166162	315.555	0.166162						Veizer et al. 1999 (original dataset)	0.708243	0.70825		5.7	-4.4	Dubious d18O
142A		142A	Melekesskian	Donezk			315.555	0.166162	315.555	0.166162						Veizer et al. 1999 (original dataset)	0.708237	0.708244		6.5	-1.9
140A		140A	Melekesskian	Donezk			315.555	0.166162	315.555	0.166162						Veizer et al. 1999 (original dataset)	0.708241	0.708248		6	-6.3	Anomalous d18O
305		305	Melekeskian	Moscow Basin	Russia		315.544	0.160905	315.544	0.160905	Choristites					Veizer et al. 1999 (original dataset)	0.708198	0.708205		5.9	-1.7
324		324	Melekeskian	Moscow Basin	Russia		315.544	0.160905	315.544	0.160905	Choristites					Veizer et al. 1999 (original dataset)	0.708259	0.708266		6	-1.7
229932		229932	Carboniferous			314			314		Anthracospirifer occiduus	Legett et al. (2020)	16.88	1.5	15.2378	Legett et al. 2020
229932		229932	Carboniferous			314			314		Anthracospirifer occiduus	Legett et al. (2020)	14.88	1.5	12.6521	Legett et al. 2020
340A		340A	Vereiskian	Moscow Basin	Russia		313.829	0.473485	313.829	0.473485	Choristites ex gr. inferus					Veizer et al. 1999 (original dataset)	0.708268	0.708275		5.7	-3
IR517-8	Ptextended-262	IR517-8	early Moscovian	Qezelqaleh	Iran	315-311	313.599	0.573867	313.599	0.573867	Derbyia sp.	This study	14.4323	0.2	12.0733	This study	0.708462	0.708462	1.21854e-05
IR517-6	Ptextended-264	IR517-6	early Moscovian	Qezelqaleh	Iran	315-311	313.599	0.573867	313.599	0.573867	?	This study	15.4937	0.2	13.4455	This study	0.708335	0.708335	8.42713e-06
112A		112A	Yeadonian	Donezk			313.069	1.08733	313.069	1.08733						Veizer et al. 1999 (original dataset)	0.708216	0.708223		4.7	-2.3
C109		329A	Tsnian	Moscow Basin	Russia		313.028	1.07756	313.028	1.07756						Vollstaedtet al. 2014	0.70829	0.708297	6e-06	5.75	-2.59
328		328	Tsnian	Moscow Basin	Russia		313.028	1.07756	313.028	1.07756	Choristites ex gr. priscus					Veizer et al. 1999 (original dataset)	0.708261	0.708268		4.8	-2.9
329A		329A	Tsnian	Moscow Basin	Russia		313.028	1.07756	313.028	1.07756	Choristites ex gr. priscus					Veizer et al. 1999 (original dataset)	0.708266	0.708273		5.8	-2.6
129A		129A	U-Cheremshan.	Donezk			312.899	1.05571	312.899	1.05571						Veizer et al. 1999 (original dataset)	0.708404	0.708411		4.7	-2.5
139A		139A	U-Cheremshan.	Donezk			312.899	1.05571	312.899	1.05571						Veizer et al. 1999 (original dataset)	0.708366	0.708373		5	-6.7	Anomalous d18O
139C		139C	U-Cheremshan.	Donezk			312.899	1.05571	312.899	1.05571						Veizer et al. 1999 (original dataset)	0.708502	0.708509		2.6	-15.2	Anomalous d18O
144A		144A	U-Cheremshan.	Donezk			312.899	1.05571	312.899	1.05571						Veizer et al. 1999 (original dataset)	0.708253	0.70826		6	-4.3
147A		147A	U-Cheremshan.	Donezk			312.899	1.05571	312.899	1.05571						Veizer et al. 1999 (original dataset)	0.708289	0.708296		5.9	-5.5	Dubious d18O
TXD033		TXD033	Carboniferous			312.8			312.8		Neospirifer cameratus	Legett et al. (2020)	15.42	3	13.3502	Legett et al. 2020 / Mii et al. 1999				2.74	-1.41
NL-1		E-132-NL-1	Early Moscovian	Palencia	Spain		312.53	0.895206	312.53	0.895206	Choristites sp.					Popp et al. 1986	0.708189	0.708296	2.6e-05	-2.43	5.76
NL-1		E-331-NL-1	Early Moscovian	Palencia	Spain		312.53	0.895206	312.53	0.895206	Choristites sp.					Popp et al. 1986	0.708234	0.708341	2.6e-05	-2.18	5.42
331B		331B	Kashirskian	Moscow Basin	Russia		312.513	0.138084	312.513	0.138084	Choristites sowerbyi					Veizer et al. 1999 (original dataset)	0.70828	0.708287		6.8	-2
C89		257A	Kashirsky	Moscow Basin, Lopasninskaya	Russia		312.433	0.164009	312.433	0.164009						Vollstaedtet al. 2014	0.70826	0.70827	2e-06	5.12	-2.87
IR940-1	Ptextended-263	IR940-1	early Moscovian	Qezelqaleh	Iran	315-311	312.309	0.588631	312.309	0.588631	Choristites sp.	This study	15.8748	0.2	13.9382	This study	0.708338	0.708338	9.82008e-06	4.23939	-1.23244
C23		266A	Kashirsky	Moscow Basin, Narskaya Fm.	Russia		312.262	0.194986	312.262	0.194986						Vollstaedtet al. 2014	0.70825	0.70826	3e-06	6.28	-2.98
266A		266A	Kashirsky	Moscow Basin	Russia		312.251	0.202764	312.251	0.202764	Choristites					Veizer et al. 1999 (original dataset)	0.708277	0.708284		6.3	-3
330		330	Kashirskian	Moscow Basin	Russia		312.242	0.153772	312.242	0.153772						Veizer et al. 1999 (original dataset)	0.708269	0.708276		4.7	-2.8
297		297	Kashirskian	Moscow Basin	Russia		311.977	0.133983	311.977	0.133983	Neospirifer					Veizer et al. 1999 (original dataset)	0.708291	0.708298		5.5	-3.1
298		298	Kashirskian	Moscow Basin	Russia		311.977	0.133983	311.977	0.133983	Choristites					Veizer et al. 1999 (original dataset)	0.7083	0.708307		4.9	-3.7
299		299	Kashirskian	Moscow Basin	Russia		311.977	0.133983	311.977	0.133983	Gigantoproductus					Veizer et al. 1999 (original dataset)	0.708293	0.7083		4.6	-4	Dubious d18O
302		302	Kashirskian	Moscow Basin	Russia		311.977	0.133983	311.977	0.133983	Choristites					Veizer et al. 1999 (original dataset)	0.708275	0.708282		6	-3.4
303		303	Kashirskian	Moscow Basin	Russia		311.977	0.133983	311.977	0.133983	Choristites					Veizer et al. 1999 (original dataset)	0.708296	0.708303		6.3	-3.4
259C		259C	Kashirsky	Moscow Basin	Russia		311.595	0.122564	311.595	0.122564	Choristites					Veizer et al. 1999 (original dataset)	0.70828	0.708287		4.7	-2.9
261A		261A	Kashirsky	Moscow Basin	Russia		311.356	0.157674	311.356	0.157674						Veizer et al. 1999 (original dataset)	0.708344	0.708351		3.7	-3.1
263B		263B	Kashirsky	Moscow Basin	Russia		311.111	0.172724	311.111	0.172724						Veizer et al. 1999 (original dataset)	0.708283	0.70829		5.3	-2.6
TXD034		TXD034	Carboniferous			311.1			311.1		Neospirifer cameratus	Legett et al. (2020)	15.81	3	13.8544	Legett et al. 2020 / Mii et al. 1999				3.04	-1.45
Y81		Y81	Carboniferous			311.1			311.1		Composita	Legett et al. (2020)	16.38	3	14.5913	Legett et al. 2020 / Mii et al. 1999				3.98	-2.1
XK-82.4	67	Xk-28c	Moscovian	from Yangshan to Wulipo	China		311.028	1.51486	311.028	1.51486	Choristites	This study	16.3	0.3	14.4879	This study / Wang et al. 2020	0.708271	0.708271		4.96	-3.28
XK-82.4		Xk-28a	Moscovian	Yangshan-Wulipo	China		311.028	1.51486	311.028	1.51486	Choristites					Wang et al., 2021				4.51	-4.06
XK-82.4		Xk-28b	Moscovian	Yangshan-Wulipo	China		311.028	1.51486	311.028	1.51486	Choristites					Wang et al., 2021	0.708271	0.708271		5.02	-3.6	Preserved
XK-82.4		Xk-28c	Moscovian	Yangshan-Wulipo	China		311.028	1.51486	311.028	1.51486	Choristites					Wang et al., 2021				4.96	-3.28
XK-82.4		Xk-28d	Moscovian	Yangshan-Wulipo	China		311.028	1.51486	311.028	1.51486	Choristites					Wang et al., 2021				5.06	-3.12
XK-82.4		Xk-28e	Moscovian	Yangshan-Wulipo	China		311.028	1.51486	311.028	1.51486	Choristites					Wang et al., 2021				-0.24	-3.92
255A		255A	Kashirsky	Moscow Basin	Russia		310.848	0.162813	310.848	0.162813	Choristites					Veizer et al. 1999 (original dataset)	0.708274	0.708281		6.7	-2.2
304		304	Podolskian	Moscow Basin	Russia		310.611	0.181316	310.611	0.181316	Choristites					Veizer et al. 1999 (original dataset)	0.708269	0.708276		4.8	-3.9
338		338	Kasimovian	Moscow Basin	Russia		310.602	0.128651	310.602	0.128651	Neospirifer tegulatus					Veizer et al. 1999 (original dataset)	0.70824	0.708247		4.7	-3.3
257A		257A	Kashirsky	Moscow Basin	Russia		310.602	0.128651	310.602	0.128651						Veizer et al. 1999 (original dataset)	0.708281	0.708288		5.1	-2.9
NL-1		E-246-NL-1	Middle Moscovian	Spain	Spain		310.524	0.891587	310.524	0.891587	Choristites sp.					Popp et al. 1986	0.708207	0.708314	2.6e-05	-2.24	6.16
232C		232C	Podolskian	Moscow Basin	Russia		310.244	0.211215	310.244	0.211215						Veizer et al. 1999 (original dataset)	0.708225	0.708232		1.3	-2.7
AJ	48	AJ39b-12	Moscovian	Jandaq Fm.	Iran	307-315			310		Choristites aff. mosquensis	This study				This study
AJ	49	AJ58-37	Moscovian	Jandaq Fm.	Iran	307-315			310		?Choristites sp.	This study				This study
AJ	50	AJ58-37	Moscovian	Jandaq Fm.	Iran	307-315			310		?Choristites sp.	This study	16.1796	0.2	14.3322	This study				4.42752	-4.88283
AJ	51	AJ58-73	Moscovian	Jandaq Fm.	Iran	307-315			310			This study				This study	0.708207	0.708207	1.51875e-05
AJ	52	AJ58-75	Moscovian	Jandaq Fm.	Iran	307-315			310			This study	16.7768	0.2	15.1044	This study	0.708254	0.708254	1.21612e-05	3.93093	-6.38156
AJ	53	AJ58-85	Moscovian	Jandaq Fm.	Iran	307-315			310			This study	16.4326	0.2	14.6594	This study	0.708226	0.708226	9.11201e-06
AJ	54	AJ58-93	Moscovian	Jandaq Fm.	Iran	307-315			310		Choristites aff. mosquensis	This study	16.1832	0.2	14.3369	This study
AJ	55	AJ58-93	Moscovian	Jandaq Fm.	Iran	307-315			310		Choristites aff. mosquensis	This study	15.6388	0.2	13.6331	This study
AJ	56	AJ77-8	Moscovian	Jandaq Fm.	Iran	307-315			310		?Choristites sp.	This study	15.4538	0.2	13.3939	This study
334		334	Podolskian	Moscow Basin	Russia		309.854	0.174987	309.854	0.174987	Composita numerosa					Veizer et al. 1999 (original dataset)	0.708283	0.70829		2.4	-3.7
234B		234B	Myachkovsk.	Moscow Basin	Russia		309.247	0.143122	309.247	0.143122	Spirifer					Veizer et al. 1999 (original dataset)	0.708259	0.708266		5.6	-2.6
C68		235	Myachkovsk.	Moscow Basin, Novlinsk. Fm.	Russia		309.004	0.184163	309.004	0.184163						Vollstaedtet al. 2014	0.70827	0.708275	4e-06	6.65	-2.63
235		235	Myachkovsk.	Moscow Basin	Russia		308.986	0.187642	308.986	0.187642						Veizer et al. 1999 (original dataset)	0.708278	0.708285		6.7	-2.6
TXD001		TXD001	Carboniferous			308.8			308.8		Neospirifer cameratus	Legett et al. (2020)	14.15	3	11.7083	Legett et al. 2020 / Mii et al. 1999				4.24	-2.96
335A		335A	Myachkovsk.	Moscow Basin	Russia		308.738	0.217075	308.738	0.217075	Choristites sowerbyi					Veizer et al. 1999 (original dataset)	0.708249	0.708256		6.8	-2.8
308		308	Myachkovsk.	Moscow Basin	Russia		308.486	0.231002	308.486	0.231002	Gigantoproductus					Veizer et al. 1999 (original dataset)	0.708263	0.70827		6.8	-3.3
311A		311A	Myachkovsk.	Moscow Basin	Russia		308.486	0.231002	308.486	0.231002	Choristites					Veizer et al. 1999 (original dataset)	0.708254	0.708261		5.6	-2.8
311B		311B	Myachkovsk.	Moscow Basin	Russia		308.486	0.231002	308.486	0.231002	Choristites					Veizer et al. 1999 (original dataset)	0.708266	0.708273		5.6	-2.8
312		312	Myachkovsk.	Moscow Basin	Russia		308.486	0.231002	308.486	0.231002	Choristites					Veizer et al. 1999 (original dataset)	0.708249	0.708256		5.7	-3
313		313	Myachkovsk.	Moscow Basin	Russia		308.486	0.231002	308.486	0.231002	Choristites					Veizer et al. 1999 (original dataset)	0.708266	0.708273		6.8	-3.7
322		322	Myachkovsk.	Moscow Basin	Russia		308.486	0.231002	308.486	0.231002	Choristites					Veizer et al. 1999 (original dataset)	0.708278	0.708285		6.7	-3.4
NL-1		E-57-NL-1	Late Moscovian	Spain	Spain		308.482	0.552674	308.482	0.552674	Choristites sp.					Popp et al. 1986	0.708196	0.708303	2.6e-05	-1.54	5.33
TXD002		TXD002	Carboniferous			308.3			308.3		Neospirifer cameratus	Legett et al. (2020)	15.1	1.5	12.9365	Legett et al. 2020 / Mii et al. 1999				4.4	-2.68
TXD002		TXD002	Carboniferous			308.3			308.3		Neospirifer cameratus	Legett et al. (2020)	14.19	3	11.7601	Legett et al. 2020 / Mii et al. 1999				4.4	-2.68
238		238	Myachkovsk.	Moscow Basin	Russia		308.237	0.233656	308.237	0.233656	Choristites					Veizer et al. 1999 (original dataset)	0.708257	0.708264		5.8	-3.3
247		247	Myachkovsk.	Moscow Basin	Russia		308.237	0.233656	308.237	0.233656	Choristites					Veizer et al. 1999 (original dataset)	0.708234	0.708241		5	-2.6
249B		249B	Myachkovsk.	Moscow Basin	Russia		307.985	0.229427	307.985	0.229427	Choristites					Veizer et al. 1999 (original dataset)	0.708218	0.708225		5.6	-3.6
243B		243B	Myachkovsk.	Moscow Basin	Russia		307.732	0.214135	307.732	0.214135	Choristites					Veizer et al. 1999 (original dataset)	0.708231	0.708238		6	-2.5
250A		250A	Myachkovsk.	Moscow Basin	Russia		307.732	0.214135	307.732	0.214135	Choristites					Veizer et al. 1999 (original dataset)	0.708249	0.708256		5.9	-3.5
Ru181		Ru181	Carboniferous			307.7			307.7		Choristites sp.	Legett et al. (2020)	14.89	3	12.665	Legett et al. 2020 / Mii et al. 1999				6.65	-3.43
239		239	Myachkovsk.	Moscow Basin	Russia		307.481	0.186599	307.481	0.186599	Choristites					Veizer et al. 1999 (original dataset)	0.70824	0.708247		6.6	-3.6
Y86		Y86	Carboniferous			307.4			307.4		Composita	Legett et al. (2020)	15.55	3	13.5183	Legett et al. 2020 / Mii et al. 1999				3.71	-1.8
Y86		Y86	Carboniferous			307.4			307.4		Composita	Legett et al. (2020)	20.4	1.5	19.7885	Legett et al. 2020 / Mii et al. 1999				3.71	-1.8	discarded previously
229964		229964	Carboniferous			307.38			307.38		Neospirifer sp.	Legett et al. (2020)	14.49	1.5	12.1479	Legett et al. 2020
229964		229964	Carboniferous			307.38			307.38		Neospirifer sp.	Legett et al. (2020)	16	3	14.1001	Legett et al. 2020
502292		502292	Carboniferous			307.38			307.38		Neospirifer cameratus	Legett et al. (2020)	19.32	3	18.3922	Legett et al. 2020						discarded previously
502292		502292	Carboniferous			307.38			307.38		Neospirifer cameratus	Legett et al. (2020)	14.12	1.5	11.6696	Legett et al. 2020
502292		502292	Carboniferous			307.38			307.38		Neospirifer cameratus	Legett et al. (2020)	15.15	3	13.0012	Legett et al. 2020
237		237	Carboniferous	Moscow Basin	Russia	307.3			307.3	0.1						Vollstaedtet al. 2014	0.70829	0.708292	4e-06	4.48	-3.68
237		237	Carboniferous	Moscow Basin	Russia	307.3			307.3	0.1						Vollstaedtet al. 2014	0.70825	0.70826	4e-06	4.48	-3.68
245		245	Myachkovsk.	Moscow Basin	Russia		307.237	0.131763	307.237	0.131763						Veizer et al. 1999 (original dataset)	0.708253	0.70826		5.6	-2.7
245		245	Carboniferous	Moscow Basin	Russia	307.2			307.2	0.1						Vollstaedtet al. 2014	0.70825	0.708254	3e-06	5.58	-2.73	Was 2.73 corrected to -2.73
245		245	Carboniferous	Moscow Basin	Russia	307.2			307.2	0.1						Vollstaedtet al. 2014	0.70826	0.708264	1e-06	5.58	-2.73
319341		319341	Carboniferous			307			307		Neospirifer cameratus	Legett et al. (2020)	13.63	1.5	11.0361	Legett et al. 2020
240B		240B	Krevyakinsky	Moscow Basin	Russia		306.637	0.165516	306.637	0.165516						Veizer et al. 1999 (original dataset)	0.708289	0.708296		-0.4	-4.4	Dubious d18O
137A		137A	Krevyakinsk.	Donezk			306.448	0.204476	306.448	0.204476						Veizer et al. 1999 (original dataset)	0.708236	0.708243		5.7	-10.7	Anomalous d18O
116A		116A	Krevyakinsk.	Donezk			306.448	0.204476	306.448	0.204476						Veizer et al. 1999 (original dataset)	0.708244	0.708251		4.4	-5.3	Dubious d18O
246A		246A	Krevyakinsky	Moscow Basin	Russia		306.266	0.165448	306.266	0.165448						Veizer et al. 1999 (original dataset)	0.708225	0.708232		0.9	-3.7
229814		229814	Carboniferous			305.5			305.5		Neospirifer dunbari	Legett et al. (2020)	14.72	1.5	12.4452	Legett et al. 2020
229815		229815	Carboniferous			305.5			305.5		Neospirifer dunbari	Legett et al. (2020)	20.13	3	19.4394	Legett et al. 2020						discarded previously
229884		229884	Carboniferous			305.35			305.35		Neospirifer dunbari	Legett et al. (2020)	14.3	1.5	11.9023	Legett et al. 2020
NL-1		E-289-NL-1	Kasimovian	Oviedo	Spain		305.343	0.631975	305.343	0.631975	Choristites sp.					Popp et al. 1986	0.708195	0.708302	2.6e-05	-3.24	6.24
NL-1		E-323-NL-1	Kasimovian	Oviedo	Spain		305.343	0.631975	305.343	0.631975	Choristites sp.					Popp et al. 1986	0.708195	0.708302	2.6e-05	-2.6	5.91
NL-1		E-324-NL-1	Kasimovian	Oviedo	Spain		305.343	0.631975	305.343	0.631975	Choristites sp.					Popp et al. 1986	0.708162	0.708269	2.6e-05	-3.13	6.34
NL-1		E-324-WB	Kasimovian	Oviedo	Spain		305.343	0.631975	305.343	0.631975	Choristites sp.					Popp et al. 1986	0.708179	0.708286	2.6e-05	-3.73	3.04
229832		229832	Carboniferous			305.17			305.17		Neospirifer dunbari	Legett et al. (2020)	18.49	3	17.3192	Legett et al. 2020
251B		251B	Khamovnich.	Moscow Basin	Russia		305.095	0.171821	305.095	0.171821						Veizer et al. 1999 (original dataset)	0.708252	0.708259		1.3	-3
251C		251C	Khamovnich.	Moscow Basin	Russia		305.095	0.171821	305.095	0.171821						Veizer et al. 1999 (original dataset)	0.70821	0.708217		1.4	-3.3
242A		242A	Khamovnich.	Moscow Basin	Russia		305.095	0.171821	305.095	0.171821						Veizer et al. 1999 (original dataset)	0.708259	0.708266		2.7	-4.2	Dubious d18O
229903		229903	Carboniferous			304.64			304.64		Neospirifer dunbari	Legett et al. (2020)	15.42	1.5	13.3502	Legett et al. 2020
229903		229903	Carboniferous			304.64			304.64		Neospirifer dunbari	Legett et al. (2020)	19.88	3	19.1162	Legett et al. 2020						discarded previously
229903		229903	Carboniferous			304.64			304.64		Neospirifer dunbari	Legett et al. (2020)	14.93	1.5	12.7167	Legett et al. 2020
K016		K016	Carboniferous			304.46			304.46		Neospirifer dunbari	Legett et al. (2020)	16.48	3	14.7206	Legett et al. 2020 / Grossman et al. 1993				3.6	-1.86
K027		K027	Carboniferous			304.46			304.46		Neospirifer dunbari	Legett et al. (2020)	17.66	3	16.2462	Legett et al. 2020 / Grossman et al. 1993				3.7	-1.67
229895		229895	Carboniferous			304.39			304.39		Neospirifer dunbari	Legett et al. (2020)	16.81	3	15.1473	Legett et al. 2020
229895		229895	Carboniferous			304.39			304.39		Neospirifer dunbari	Legett et al. (2020)	16.25	1.5	14.4233	Legett et al. 2020
253C		253C	Dorogomilov.	Moscow Basin	Russia		304.182	0.103537	304.182	0.103537						Veizer et al. 1999 (original dataset)	0.708232	0.708239		1.5	-3
K042C		K042C	Carboniferous			304.17			304.17		Neospirifer dunbari	Legett et al. (2020)	15.23	1.5	13.1046	Legett et al. 2020 / Mii and Grossman 1994				3.2	-1.7
K186		K186	Carboniferous			304.17			304.17		Neospirifer dunbari	Legett et al. (2020)	17.25	3	15.7161	Legett et al. 2020 / Grossman et al. 1993				3.32	-1.97
272		272	Drogomilovsk.	Moscow Basin	Russia	304.1			304.1	0.1						Vollstaedtet al. 2014	0.70825	0.708255	2e-06	3.61	-3.04
272		272	Drogomilovsk.	Moscow Basin	Russia		304.012	0.102656	304.012	0.102656						Veizer et al. 1999 (original dataset)	0.708198	0.708205		3.6	-3
229025		229025	Carboniferous			303.87			303.87		Neospirifer dunbari	Legett et al. (2020)	14.44	3	12.0833	Legett et al. 2020
229025		229025	Carboniferous			303.87			303.87		Neospirifer dunbari	Legett et al. (2020)	14.32	1.5	11.9281	Legett et al. 2020
268B		268B	Drogomilovsk.	Moscow Basin	Russia		303.855	0.0827979	303.855	0.0827979						Veizer et al. 1999 (original dataset)	0.708198	0.708205		3.9	-2.6
229332		229332	Carboniferous			303.7			303.7		Derbya crassa texa	Legett et al. (2020)	16.98	1.5	15.367	Legett et al. 2020
Finis		Finis 37	Carboniferous			303.7			303.7		Crurithyris	Legett et al. (2020)	13.44	3	10.7904	Legett et al. 2020 / Grossman et al. 1991
Finis		Finis 56	Carboniferous			303.7			303.7		Crurithyris	Legett et al. (2020)	16.75	3	15.0697	Legett et al. 2020 / Grossman et al. 1991
229819		229819	Carboniferous			303.47			303.47		Neospirifer dunbari	Legett et al. (2020)	16.26	1.5	14.4362	Legett et al. 2020
274A		274A	Rusavkinsky	Moscow Basin	Russia		303.297	0.141376	303.297	0.141376						Veizer et al. 1999 (original dataset)	0.708195	0.708202		2.9	-3.2
274C		274C	Rusavkinsky	Moscow Basin	Russia		303.297	0.141376	303.297	0.141376						Veizer et al. 1999 (original dataset)	0.708189	0.708196		3.6
275C		275C	Rusavkinsky	Moscow Basin	Russia		303.297	0.141376	303.297	0.141376						Veizer et al. 1999 (original dataset)	0.70819	0.708197		5.5	-2.4
269		269	Rusavkinsky	Moscow Basin	Russia		303.297	0.141376	303.297	0.141376						Veizer et al. 1999 (original dataset)	0.708202	0.708209		6.3	-3
Nec 6		Nec 6-12	Carboniferous			303.12			303.12		Composita	Legett et al. (2020)	12.04	3	8.98048	Legett et al. 2020 / Grossman et al. 1991
Nec 6		Nec 6-2	Carboniferous			303.12			303.12		Composita	Legett et al. (2020)	12.29	3	9.30368	Legett et al. 2020 / Grossman et al. 1991
271A		271A	Pavl.-Posad.	Moscow Basin	Russia		302.449	0.159621	302.449	0.159621						Veizer et al. 1999 (original dataset)	0.708176	0.708183		3.5	-0.9
270A		270A	Pavl.-Posad.	Moscow Basin	Russia		302.449	0.159621	302.449	0.159621						Veizer et al. 1999 (original dataset)	0.708185	0.708192		4	-1.8
229762		229762	Carboniferous			302.33			302.33		Neospirifer dunbari	Legett et al. (2020)	16.77	1.5	15.0955	Legett et al. 2020
278A		278A	Noginskian	Moscow Basin	Russia		301.636	0.180063	301.636	0.180063						Veizer et al. 1999 (original dataset)	0.708183	0.70819		4.6	-2.1
IR946-6	Ptextended-271	IR946-6	Gzhelian	Toyeh	Iran	303-300	301.504	0.528238	301.504	0.528238	Neospirifer sp.	This study	15.7775	0.2	13.8124	This study	0.708487	0.708487	9.8455e-06	4.52356	1.63811
279A		279A	Noginskian	Moscow Basin	Russia		301.261	0.207847	301.261	0.207847	Gigantoproductus					Veizer et al. 1999 (original dataset)	0.708163	0.70817		3.6	-2.4
XK-139		Xk-54	Gzhelian	Yangshan-Wulipo	China				301		Unkown					Wang et al., 2021				6.39	-3.48
C9		276	Noginskian	Moscow Basin	Russia		300.879	0.189995	300.879	0.189995						Vollstaedtet al. 2014	0.70822	0.708226	3e-06	4.53	-0.45
281		281	Noginskian	Moscow Basin	Russia		300.869	0.175716	300.869	0.175716	Gigantoproductus					Veizer et al. 1999 (original dataset)	0.708152	0.708159		6.6	-2.4
280B		280B	Noginskian	Moscow Basin	Russia		300.869	0.175716	300.869	0.175716						Veizer et al. 1999 (original dataset)	0.708148	0.708155		6.8	-2.6
228767		228767	Carboniferous			300.5			300.5		Neospirifer triplicatus	Legett et al. (2020)	18.15	3	16.8796	Legett et al. 2020
228964		228964	Carboniferous			300.5			300.5		Neospirifer kansasensis	Legett et al. (2020)	24.01	3	24.4556	Legett et al. 2020						discarded previously
228768h		228768h	Carboniferous			300.5			300.5		Neospirifer triplicatus	Legett et al. (2020)	16.29	1.5	14.475	Legett et al. 2020
228768h		228768h	Carboniferous			300.5			300.5		Neospirifer triplicatus	Legett et al. (2020)	16.01	1.5	14.113	Legett et al. 2020
228768s		228768s	Carboniferous			300.5			300.5		Neospirifer triplicatus	Legett et al. (2020)	15.65	1.5	13.6476	Legett et al. 2020
228768s		228768s	Carboniferous			300.5			300.5		Neospirifer triplicatus	Legett et al. (2020)	14.56	1.5	12.2384	Legett et al. 2020
281		281	Noginskian	Moscow Basin	Russia	300.2			300.2	0.1						Vollstaedtet al. 2014	0.70816	0.708166	5e-06	6.56	-2.38
TK		TK-2-2	Upper Gzhelian	Hughes Creeck Sh					300		undetermined	Joachimski et al. (2005)	12.4	0.25	9.4459	Joachimski et al. 2005
TK		TK-2-1	Upper Gzhelian	Hughes Creeck Sh					300		undetermined	Joachimski et al. (2005)	15.8	0.25	13.8415	Joachimski et al. 2005
TXP009		TXP009	Carboniferous			300			300		Composita	Legett et al. (2020)	16.7	1.5	15.005	Legett et al. 2020 / Grossman et al. 2008				2.63	-3.14
TXP015		TXP015	Carboniferous			300			300		Neospirifer	Legett et al. (2020)	18.02	3	16.7116	Legett et al. 2020				3.99	-3.33
TXP015		TXP015	Carboniferous			300			300		Neospirifer	Legett et al. (2020)	17.8	3	16.4271	Legett et al. 2020				3.99	-3.33
TXP016		TXP016	Carboniferous			300			300		Neospirifer	Legett et al. (2020)	15.9	3	13.9708	Legett et al. 2020				4.8	-3.14
TXP017		TXP017	Carboniferous			300			300		Neospirifer	Legett et al. (2020)	16.44	1.5	14.6689	Legett et al. 2020				2.03	-3.66
277C		277C	Melekhovskian	Moscow Basin	Russia		299.708	0.292513	299.708	0.292513						Veizer et al. 1999 (original dataset)	0.708164	0.708171		4.4	-2
TXP037		TXP037	Carboniferous			299.4			299.4		Composita subtilita	Legett et al. (2020)	13.98	1.5	11.4886	Legett et al. 2020 / Grossman et al. 2008				4.68	-3.06
228958		228958	Carboniferous			299.35			299.35		Neospirifer kansasensis	Legett et al. (2020)	15.18	1.5	13.0399	Legett et al. 2020
228960		228960	Carboniferous			299.35			299.35		Neospirifer kansasensis	Legett et al. (2020)	12.85	3	10.0277	Legett et al. 2020
228961		228961	Carboniferous			299.35			299.35		Neospirifer kansasensis	Legett et al. (2020)	22.48	3	22.4776	Legett et al. 2020						discarded previously
228961		228961	Carboniferous			299.35			299.35		Neospirifer kansasensis	Legett et al. (2020)	14.64	1.5	12.3418	Legett et al. 2020
228942		228942	Carboniferous			299.32			299.32		Neospirifer kansasensis	Legett et al. (2020)	15.15	1.5	13.0012	Legett et al. 2020
228942		228942	Carboniferous			299.32			299.32		Neospirifer kansasensis	Legett et al. (2020)	15.74	1.5	13.7639	Legett et al. 2020
228947		228947	Carboniferous			299.32			299.32		Neospirifer kansasensis	Legett et al. (2020)	8.57	3	4.49438	Legett et al. 2020						discarded previously
228949		228949	Carboniferous			299.32			299.32		Neospirifer kansasensis	Legett et al. (2020)	14.54	1.5	12.2125	Legett et al. 2020
228949		228949	Carboniferous			299.32			299.32		Neospirifer kansasensis	Legett et al. (2020)	13.04	3	10.2733	Legett et al. 2020
228949		228949	Carboniferous			299.32			299.32		Neospirifer kansasensis	Legett et al. (2020)	13.58	3	10.9714	Legett et al. 2020
228942-2		228942-2	Carboniferous			299.32			299.32		Neospirifer kansasensis	Legett et al. (2020)	16.94	1.5	15.3153	Legett et al. 2020
223474		223474	Carboniferous			299.25			299.25		Neospirifer cameratus	Legett et al. (2020)	16.56	3	14.824	Legett et al. 2020
223474		223474	Carboniferous			299.25			299.25		Neospirifer cameratus	Legett et al. (2020)	16.25	1.5	14.4233	Legett et al. 2020
223474		223474	Carboniferous			299.25			299.25		Neospirifer cameratus	Legett et al. (2020)	16.23	1.5	14.3974	Legett et al. 2020
228952		228952	Carboniferous			299.25			299.25		Neospirifer kansasensis	Legett et al. (2020)	14.41	1.5	12.0445	Legett et al. 2020
228954		228954	Carboniferous			299.25			299.25		Neospirifer kansasensis	Legett et al. (2020)	15.95	1.5	14.0354	Legett et al. 2020
223474-2		223474-2	Carboniferous			299.25			299.25		Neospirifer cameratus	Legett et al. (2020)	13.95	3	11.4498	Legett et al. 2020
223474-2		223474-2	Carboniferous			299.25			299.25		Neospirifer cameratus	Legett et al. (2020)	15.97	1.5	14.0613	Legett et al. 2020
228944		228944	Carboniferous			299.09			299.09		Neospirifer kansasensis	Legett et al. (2020)	20.49	3	19.9048	Legett et al. 2020						discarded previously
BP-21.2		BP-15b	Asselian	Bianping section	China		298.635	0.162435	298.635	0.162435	unknown					Wang et al., 2021				5.72	-3.41
BP-21.2		BP-15a	Asselian	Bianping section	China		298.635	0.162435	298.635	0.162435	unknown					Wang et al., 2021		0.708124		6.06	-3.14	Preserved
BP-21.2		BP-58a	Asselian	Bianping section	China		298.635	0.162435	298.635	0.162435	Martinia?					Wang et al., 2021		0.708121		6.72	-2.69	Preserved
BP-21.2		BP-58b	Asselian	Bianping section	China		298.635	0.162435	298.635	0.162435	Martinia?					Wang et al., 2021		0.70812		6.79	-2	Preserved
BP-25.7		BP-5b	Asselian	Bianping section	China		298.365	0.226059	298.365	0.226059	Parachoristites					Wang et al., 2021				5.69	-2.82
BP-25.7		BP-5a	Asselian	Bianping section	China		298.365	0.226059	298.365	0.226059	Parachoristites					Wang et al., 2021		0.708115		6.32	-2.43	Preserved
BP-25.7		BP-27b	Asselian	Bianping section	China		298.365	0.226059	298.365	0.226059	unknown					Wang et al., 2021		0.708122		6.8	-2.02	Preserved
BP-25.7		BP-27a	Asselian	Bianping section	China		298.365	0.226059	298.365	0.226059	unknown					Wang et al., 2021				6.95	-2.4
36222		36222	Asselian	Kansas	USA		298.201	0.0885285	298.201	0.0885285						Korte et al. 2006 / Korte et al. 2005		0.707929	7e-06	4.87	-1.6
BP-33		BP-19	Asselian	Bianping section	China		298.104	0.257283	298.104	0.257283	unknown					Wang et al., 2021		0.708195		6.11	-2.76	Preserved
BP-33		BP-55b	Asselian	Bianping section	China		298.104	0.257283	298.104	0.257283	unknown					Wang et al., 2021				5.82	-3.02
BP-33		BP-55a	Asselian	Bianping section	China		298.104	0.257283	298.104	0.257283	unknown					Wang et al., 2021		0.708107		5.9	-2.94	Preserved
ru7		ru7	Asselian	Southern Urals	Russia		298.077	0.124649	298.077	0.124649						Korte et al. 2006 Veizer et al. 1999	0.70804	0.708045	8e-06	4.94	-2.26
ru9		ru9	Asselian	Southern Urals	Russia		297.98	0.693679	297.98	0.693679						Korte et al. 2006 Veizer et al. 1999	0.708	0.707991	8e-06	4.52	-0.22
44403		44403	Asselian	Kansas	USA		297.952	0.104904	297.952	0.104904						Korte et al. 2006 / Korte et al. 2005		0.70805	7e-06	4.86	-1.37
BP-39		BP-4b	Asselian	Bianping section	China		297.836	0.289065	297.836	0.289065	Parachoristites					Wang et al., 2021				6.56	-2.56
BP-39		BP-4c	Asselian	Bianping section	China		297.836	0.289065	297.836	0.289065	Parachoristites					Wang et al., 2021		0.708122		6.56	-2.78	Preserved
BP-39		BP-4a	Asselian	Bianping section	China		297.836	0.289065	297.836	0.289065	Parachoristites					Wang et al., 2021		0.708121		6.44	-2.74	Preserved
BP-51		BP-13a	Asselian	Bianping section	China		297.58	0.304689	297.58	0.304689	Phricodothyris					Wang et al., 2021		0.708097		6.12	-2.68	Preserved
BP-51		BP-13b	Asselian	Bianping section	China		297.58	0.304689	297.58	0.304689	Phricodothyris					Wang et al., 2021				6.17	-3.02
XK-160.5		Xk-24a	Asselian	Yangshan-Wulipo	China		297.546	0.639478	297.546	0.639478	Stenoscisma					Wang et al., 2021				5.45	-4.7
XK-160.5		Xk-24b	Asselian	Yangshan-Wulipo	China		297.546	0.639478	297.546	0.639478	Stenoscisma					Wang et al., 2021	0.708105	0.708105		4.93	-5.08	Preserved
XK-160.5		Xk-24c	Asselian	Yangshan-Wulipo	China		297.546	0.639478	297.546	0.639478	Stenoscisma					Wang et al., 2021				1.24	-4.99
BP-61.5		BP-57a	Asselian	Bianping section	China		297.312	0.318779	297.312	0.318779	Parachoristites					Wang et al., 2021				5.84	-2.67
BP-61.5		BP-57b	Asselian	Bianping section	China		297.312	0.318779	297.312	0.318779	Parachoristites					Wang et al., 2021		0.708063		5.9	-3.45	Preserved
BP-72.5		BP-53b	Asselian	Bianping section	China	297.18			297.18		Phricodothyris					Wang et al., 2021				5.33	-3.19
BP-72.5		BP-53a	Asselian	Bianping section	China	297.18			297.18		Phricodothyris					Wang et al., 2021				5.36	-2.59
BP-83.9		BP-14c	Asselian	Bianping section	China		297.041	0.335165	297.041	0.335165	Parachoristites					Wang et al., 2021		0.708109		4.82	-3.61	Preserved
BP-83.9		BP-14a	Asselian	Bianping section	China		297.041	0.335165	297.041	0.335165	Parachoristites					Wang et al., 2021				4.87	-3
BP-83.9		BP-14b	Asselian	Bianping section	China		297.041	0.335165	297.041	0.335165	Parachoristites					Wang et al., 2021		0.70809		5.01	-2.05	Preserved
BP-83.9		BP-42b	Asselian	Bianping section	China		297.041	0.335165	297.041	0.335165	Parachoristites					Wang et al., 2021				5.81	-3.6
BP-83.9		BP-42c	Asselian	Bianping section	China		297.041	0.335165	297.041	0.335165	Parachoristites					Wang et al., 2021		0.708103		5.82	-3.62	Preserved
BP-83.9		BP-42a	Asselian	Bianping section	China		297.041	0.335165	297.041	0.335165	Parachoristites					Wang et al., 2021		0.708072		5.74	-3.32	Preserved
BP-86.4		BP-8	Asselian	Bianping section			296.769	0.344758	296.769	0.344758	Parachoristites					Wang et al., 2021		0.708085		6.54	-2.45	Preserved
217434		217434	Asselian			296.65			296.65		Neospirifer cameratus	Legett et al. (2020)	17.06	3	15.4705	Legett et al. 2020
217434		217434	Asselian			296.65			296.65		Neospirifer cameratus	Legett et al. (2020)	16.37	1.5	14.5784	Legett et al. 2020
217434		217434	Asselian			296.65			296.65		Neospirifer cameratus	Legett et al. (2020)	15.59	1.5	13.57	Legett et al. 2020
217434-2		217434-2	Asselian			296.65			296.65		Neospirifer cameratus	Legett et al. (2020)	14.44	1.5	12.0833	Legett et al. 2020
ru25		ru25	Asselian	Southern Urals	Russia		296.534	0.91753	296.534	0.91753						Korte et al. 2006 Veizer et al. 1999	0.70798	0.707971	8e-06	4.6	-0.16
TXP020		TXP020	Asselian			296.53			296.53		Neospirifer dunbari	Legett et al. (2020)	15.44	3	13.3761	Legett et al. 2020 / Grossman et al. 2008				2.39	-3.57
TXP020		TXP020	Asselian			296.53			296.53		Neospirifer dunbari	Legett et al. (2020)	18.88	1.5	17.8234	Legett et al. 2020 / Grossman et al. 2008				2.39	-3.57
BP-117.5		BP-24b	Asselian	Bianping section	China		296.486	0.354455	296.486	0.354455	Parachoristites					Wang et al., 2021		0.708065		5.77	-3.21	Preserved
BP-117.5		BP-24a	Asselian	Bianping section	China		296.486	0.354455	296.486	0.354455	Parachoristites					Wang et al., 2021		0.708029		5.55	-3.39	Preserved
BP-123		BP-47b	Asselian	Bianping section	China		296.213	0.356122	296.213	0.356122	Martinia?					Wang et al., 2021		0.707988		5.4	-2.81	Preserved
BP-123		BP-47a	Asselian	Bianping section	China		296.213	0.356122	296.213	0.356122	Martinia?					Wang et al., 2021		0.708006		5.39	-2.89	Preserved
228987		228987	Permian			296.21			296.21		Neospirifer texanus	Legett et al. (2020)	18.3	1.5	17.0736	Legett et al. 2020
XK-189.3	68	Xk-43c	Asselian	from Yangshan to Wulipo	China		296.185	0.745329	296.185	0.745329	Spiriferida	This study	17.01	0.3	15.4058	This study / Wang et al. 2020	0.707807	0.707807		5.18	-3.28
XK-189.3		Xk-43a	Asselian	Yangshan-Wulipo	China		296.185	0.745329	296.185	0.745329	Unkown					Wang et al., 2021				5.04	-2.27
XK-189.3		Xk-43b	Asselian	Yangshan-Wulipo	China		296.185	0.745329	296.185	0.745329	Unkown					Wang et al., 2021				5.09	-2.73
XK-189.3		Xk-43c	Asselian	Yangshan-Wulipo	China		296.185	0.745329	296.185	0.745329	Unkown					Wang et al., 2021	0.707807	0.707807		5.18	-3.28	Preserved
XK-189.3		Xk-43	Asselian	Yangshan-Wulipo	China		296.185	0.745329	296.185	0.745329	Unkown					Wang et al., 2021				3.28	-4.68
XK-189.3		Xk-177a	Asselian	Yangshan-Wulipo	China		296.185	0.745329	296.185	0.745329	Choristites					Wang et al., 2021	0.707897	0.707897		4.94	-2.87	Preserved
XK-189.3		Xk-177b	Asselian	Yangshan-Wulipo	China		296.185	0.745329	296.185	0.745329	Choristites					Wang et al., 2021				4.8	-3.01
XK-189.3		Xk-177c	Asselian	Yangshan-Wulipo	China		296.185	0.745329	296.185	0.745329	Choristites					Wang et al., 2021				4.9	-3.61
XK-189.3		Xk-199a	Asselian	Yangshan-Wulipo	China		296.185	0.745329	296.185	0.745329	Unkown					Wang et al., 2021	0.707836	0.707836		4.53	-3.46	Preserved
XK-189.3		Xk-199b	Asselian	Yangshan-Wulipo	China		296.185	0.745329	296.185	0.745329	Unkown					Wang et al., 2021	0.70783	0.70783		4.9	-2.8	Preserved
XK-189.3		Xk-199c	Asselian	Yangshan-Wulipo	China		296.185	0.745329	296.185	0.745329	Unkown					Wang et al., 2021				4.78	-2.52
XK-189.3		Xk-199d	Asselian	Yangshan-Wulipo	China		296.185	0.745329	296.185	0.745329	Unkown					Wang et al., 2021				2.99	-5.87
ch41		ch41	Asselian				296.117	0.959475	296.117	0.959475						Vollstaedtet al. 2014	0.70774	0.707749	4e-06	3.46	-5.56
IR52-128	Ptextended-265	IR52-128	middle Asselian	Emarat	Iran	295-297	295.981	0.366846	295.981	0.366846	Larispirifer fantinisestinii	This study	14.5317	0.2	12.2018	This study	0.708138	0.708138	9.30373e-06
BP-143.5		BP-2b	Asselian	Bianping section	China		295.924	0.359958	295.924	0.359958	Parachoristites					Wang et al., 2021		0.70801		4.97	-0.89	Preserved
BP-143.5		BP-2a	Asselian	Bianping section	China		295.924	0.359958	295.924	0.359958	Parachoristites					Wang et al., 2021		0.707976		4.89	-0.82	Preserved
BP-143.5		BP-16a	Asselian	Bianping section	China		295.924	0.359958	295.924	0.359958	Elivi					Wang et al., 2021		0.707991		5.65	-0.93	Preserved
BP-143.5		BP-16c	Asselian	Bianping section	China		295.924	0.359958	295.924	0.359958	Elivi					Wang et al., 2021				5.54	-3.08
BP-143.5		BP-16b	Asselian	Bianping section	China		295.924	0.359958	295.924	0.359958	Elivi					Wang et al., 2021		0.707978		5.47	-2.35	Preserved
BP-143.5		BP-40b	Asselian	Bianping section	China		295.924	0.359958	295.924	0.359958	Parachoristites					Wang et al., 2021		0.707984		5.41	-1.72	Preserved
BP-143.5		BP-40a	Asselian	Bianping section	China		295.924	0.359958	295.924	0.359958	Parachoristites					Wang et al., 2021		0.707989		5	-1.02	Preserved
BP-148.5		BP-38	Asselian	Bianping section	China		295.664	0.353228	295.664	0.353228	Martinia?					Wang et al., 2021		0.707986		6.07	-3.12	Preserved
bj-Teltvika		bj-Teltvika	Asselian	Teltvika, Bjornoya			295.474	0.195478	295.474	0.195478						Korte et al. 2006 / Korte et al. 2005		0.708065	7e-06	3.7	-1.91
BP-170.1		BP-59c	Asselian	Bianping section	China		295.399	0.342879	295.399	0.342879	Martinia?					Wang et al., 2021				4.9	-3.14
BP-170.1		BP-59a	Asselian	Bianping section	China		295.399	0.342879	295.399	0.342879	Martinia?					Wang et al., 2021		0.707995		5.52	-2.75	Preserved
BP-170.1		BP-59b	Asselian	Bianping section	China		295.399	0.342879	295.399	0.342879	Martinia?					Wang et al., 2021		0.708003		5.53	-2.3	Preserved
BP-170.1		BP-59d	Asselian	Bianping section	China		295.399	0.342879	295.399	0.342879	Martinia?					Wang et al., 2021				5.25	-3.43
ru8		ru8	Asselian	Southern Urals	Russia		295.19	0.95419	295.19	0.95419						Korte et al. 2006 Veizer et al. 1999	0.70799	0.707981	7e-06	4.72	-0.26
BP-188.8		BP-46b	Asselian	Bianping section	China		295.129	0.325653	295.129	0.325653	Rhynconellid					Wang et al., 2021				5.66	-2.74
BP-188.8		BP-46a	Asselian	Bianping section	China		295.129	0.325653	295.129	0.325653	Rhynconellid					Wang et al., 2021		0.708012		5.56	-2.6	Preserved
TXP012		TXP012	Asselian			294.87			294.87		Composita	Legett et al. (2020)	20.14	3	19.4524	Legett et al. 2020				5.6	-3.37	discarded previously
BP-191.8		BP-9b	Asselian	Bianping section	China		294.862	0.305577	294.862	0.305577	Martinia?					Wang et al., 2021				5.03	-2.63
BP-191.8		BP-9a	Asselian	Bianping section	China		294.862	0.305577	294.862	0.305577	Martinia?					Wang et al., 2021		0.707955		4.97	-2.62	Preserved
BP-191.8		BP-10b	Asselian	Bianping section	China		294.862	0.305577	294.862	0.305577	Phricodothyris					Wang et al., 2021				5.27	-3.65
BP-191.8		BP-10a	Asselian	Bianping section	China		294.862	0.305577	294.862	0.305577	Phricodothyris					Wang et al., 2021		0.707946		5.32	-2.64	Preserved
BP-191.8		BP-22b	Asselian	Bianping section	China		294.862	0.305577	294.862	0.305577	Elivi					Wang et al., 2021		0.707945		5.88	-4.12	Preserved
BP-191.8		BP-22a	Asselian	Bianping section	China		294.862	0.305577	294.862	0.305577	Elivi					Wang et al., 2021				5.85	-3.8
XK-200.4	69	Xk-40c	Asselian	from Yangshan to Wulipo	China		294.861	0.633259	294.861	0.633259	Spiriferida	This study				This study / Wang et al. 2020	0.707814	0.707814		4.68	-3.65
XK-200.4		Xk-12a	Asselian	Yangshan-Wulipo	China		294.861	0.633259	294.861	0.633259	Choristites					Wang et al., 2021				4.23		d18O=-16.87, removed
XK-200.4		Xk-12b	Asselian	Yangshan-Wulipo	China		294.861	0.633259	294.861	0.633259	Choristites					Wang et al., 2021	0.70782	0.70782		5.19	-3.25	Preserved
XK-200.4		Xk-12c	Asselian	Yangshan-Wulipo	China		294.861	0.633259	294.861	0.633259	Choristites					Wang et al., 2021				3.75	-3.43
XK-200.4		Xk-40a	Asselian	Yangshan-Wulipo	China		294.861	0.633259	294.861	0.633259	Choristites					Wang et al., 2021				4.66	-3.23
XK-200.4		Xk-40b	Asselian	Yangshan-Wulipo	China		294.861	0.633259	294.861	0.633259	Choristites					Wang et al., 2021	0.707814	0.707814		4.93	-3.26	Preserved
XK-200.4		Xk-40c	Asselian	Yangshan-Wulipo	China		294.861	0.633259	294.861	0.633259	Choristites					Wang et al., 2021				4.68	-3.65
XK-200.4		Xk-40d	Asselian	Yangshan-Wulipo	China		294.861	0.633259	294.861	0.633259	Choristites					Wang et al., 2021				4.51	-3.43
XK-200.4		Xk-40e	Asselian	Yangshan-Wulipo	China		294.861	0.633259	294.861	0.633259	Choristites					Wang et al., 2021				3.82	-3.08
RAK15		RAK15	Asselian			294.63			294.63		Dictyclostus latus	Legett et al. (2020)	16.59	1.5	14.8628	Legett et al. 2020 / Grossman et al. 2008				3.8	-1.41
BP-197.2		BP-12	Asselian	Bianping section	China		294.59	0.2883	294.59	0.2883	Martinia?					Wang et al., 2021		0.707952		5.04	-3.47	Preserved
BP-197.2		BP-26b	Asselian	Bianping section	China		294.59	0.2883	294.59	0.2883	Parachoristites					Wang et al., 2021				5.49	-4.34
BP-197.2		BP-26c	Asselian	Bianping section	China		294.59	0.2883	294.59	0.2883	Parachoristites					Wang et al., 2021		0.70793		6.17	-3.75	Preserved
BP-197.2		BP-26a	Asselian	Bianping section	China		294.59	0.2883	294.59	0.2883	Parachoristites					Wang et al., 2021		0.707939		6.05	-3.53	Preserved
ru11		ru11	Asselian	Southern Urals	Russia		294.342	0.12884	294.342	0.12884						Korte et al. 2006 Veizer et al. 1999	0.70785	0.707655	3.6e-05	1.83	-2.28
BP-201.2		BP-18b	Asselian	Bianping section	China		294.321	0.260833	294.321	0.260833	unknown					Wang et al., 2021				6.29	-4.22
BP-201.2		BP-18a	Asselian	Bianping section	China		294.321	0.260833	294.321	0.260833	unknown					Wang et al., 2021		0.707957		6.2	-3.49	Preserved
BP-201.2		BP-51a	Asselian	Bianping section	China		294.321	0.260833	294.321	0.260833	Martinia?					Wang et al., 2021		0.707942		6.02	-2.63	Preserved
TXP074		TXP074	Asselian			294.15			294.15		Squamaria moorei	Legett et al. (2020)	15.68	1.5	13.6864	Legett et al. 2020				1.9	-2.52
TXP074		TXP074	Asselian			294.15			294.15		Squamaria moorei	Legett et al. (2020)	12.4	3	9.4459	Legett et al. 2020				1.9	-2.52
TXP074		TXP074	Asselian			294.15			294.15		Squamaria moorei	Legett et al. (2020)	17.02	1.5	15.4187	Legett et al. 2020				1.9	-2.52
ru12		ru12	Sakmarian	Southern Urals	Russia		294.116	0.147187	294.116	0.147187						Korte et al. 2006 Veizer et al. 1999	0.7078	0.707785	8e-06	4.94	-3.49
BP-222.3		BP-30b	Asselian	Bianping section	China		294.046	0.214915	294.046	0.214915	Martinia?					Wang et al., 2021		0.707753		4.36	-1.64	Preserved
BP-222.3		BP-30a	Asselian	Bianping section	China		294.046	0.214915	294.046	0.214915	Martinia?					Wang et al., 2021				4.45	-1.99
ru14		ru14	Sakmarian	Southern Urals	Russia		293.949	0.124299	293.949	0.124299						Korte et al. 2006 Veizer et al. 1999	0.70766	0.707687	7e-06	4.11	-4.02
BP-223.8		BP-33b	Asselian	Bianping section	China		293.78	0.153954	293.78	0.153954	Martinia?					Wang et al., 2021				4.73	-3.86
BP-223.8		BP-33a	Asselian	Bianping section	China		293.78	0.153954	293.78	0.153954	Martinia?					Wang et al., 2021		0.707781		4.81	-3.64	Preserved
BP-223.8		BP-34	Asselian	Bianping section	China		293.78	0.153954	293.78	0.153954	Martinia?					Wang et al., 2021		0.707777		5.02	-3.55	Preserved
ru13		ru13	Sakmarian	Southern Urals	Russia		293.733	0.104404	293.733	0.104404						Korte et al. 2006 Veizer et al. 1999	0.7077	0.707687	7e-06	4.16	-2.85
ru29		ru29	Asselian	Southern Urals	Russia		293.637	0.825545	293.637	0.825545						Korte et al. 2006 Veizer et al. 1999	0.70791	0.70797	1.2e-05	3.93	-0.56
TXP053		TXP053	Permian			293.52			293.52		Composita subtilita	Legett et al. (2020)	17.36	1.5	15.8583	Legett et al. 2020				5.38	-3.89
BP-230.3		BP-6b	Sakmarian	Bianping section	China		293.198	0.176746	293.198	0.176746	Martinia?					Wang et al., 2021				5.2	-3.26
BP-230.3		BP-6a	Sakmarian	Bianping section	China		293.198	0.176746	293.198	0.176746	Martinia?					Wang et al., 2021		0.707772		4.45	-3.73	Preserved
BP-230.3		BP-54b	Sakmarian	Bianping section	China		293.198	0.176746	293.198	0.176746	Martinia?					Wang et al., 2021		0.707791		4.7	-3.86	Preserved
BP-230.3		BP-54a	Sakmarian	Bianping section	China		293.198	0.176746	293.198	0.176746	Martinia?					Wang et al., 2021		0.707776		4.76	-3.59	Preserved
OL-18		OL-18-1	Sakmarian	Saiwan Fm	Oman	293			293		Neospirifer sp.	Joachimski et al. (2005)	10.7	0.25	7.24809	Joachimski et al. 2005						HJ - added these but they still need checking especially ages
OL-18		OL-18-2	Sakmarian	Saiwan Fm	Oman	293			293		Neospirifer sp.	Joachimski et al. (2005)	10.4	0.25	6.86025	Joachimski et al. 2005
OL-14	103	OL14-1	Sakmarian	Saiwan Fm.	Oman		292.924	0.301233	292.924	0.301233	Pachycyrtella omanensis	This study	12.41	0.3	9.45882	This study / Angiolini et al. 2003, 2008				12.41
OL-14	104	OL14-30	Sakmarian	Saiwan Fm.	Oman		292.924	0.301233	292.924	0.301233	Pachycyrtella omanensis	This study	12.28	0.3	9.29076	This study / Angiolini et al. 2003, 2008				12.28
OL-14	105	OL14-K	Sakmarian	Saiwan Fm.	Oman		292.924	0.301233	292.924	0.301233	Pachycyrtella omanensis	This study				This study / Angiolini et al. 2003, 2008
OL-14		OL-14	Sakmarian	Saiwan Fm	Oman		292.924	0.301233	292.924	0.301233	Neospirifer sp.	Joachimski et al. (2005)	11.7	0.25	8.54092	Joachimski et al. 2005
OL-14		OL-14	Sakmarian	Saiwan Fm	Oman		292.924	0.301233	292.924	0.301233						Angiolini et al. 2008		0.707941	1.4e-05	4.7	-3.4
OL-14		OL-14-49	Sakmarian	Saiwan Fm	Oman		292.924	0.301233	292.924	0.301233	Pachycyrtella omanensis					Angiolini et al. 2008		0.707935	1.4e-05	3.5	-3.7
OL-14		OL14-H	Sakmarian	Saiwan Fm	Oman		292.924	0.301233	292.924	0.301233	Pachycyrtella omanensis					Angiolini et al. 2008		0.707937	1.4e-05	4	-3.1
OL-14		OL14-K	Sakmarian	Saiwan Fm	Oman		292.924	0.301233	292.924	0.301233	Pachycyrtella omanensis					This study / Angiolini et al. 2003, 2008
BP-237.7		BP-7a	Sakmarian	Bianping section	China		292.867	0.245102	292.867	0.245102	Parachoristites					Wang et al., 2021				4.48	-4.99
BP-237.7		BP-7b	Sakmarian	Bianping section	China		292.867	0.245102	292.867	0.245102	Parachoristites					Wang et al., 2021		0.707755		4.65	-3.56	Preserved
BP-237.7		BP-45c	Sakmarian	Bianping section	China		292.867	0.245102	292.867	0.245102	unknown					Wang et al., 2021				4.85	-3.97
BP-237.7		BP-45a	Sakmarian	Bianping section	China		292.867	0.245102	292.867	0.245102	unknown					Wang et al., 2021		0.707793		4.89	-3.87	Preserved
BP-237.7		BP-45b	Sakmarian	Bianping section	China		292.867	0.245102	292.867	0.245102	unknown					Wang et al., 2021		0.707981		4.85	-3.79	Altered
OM-34	99	OM34-19	Sakmarian	Saiwan Fm.	Oman		292.56	0.36	292.56	0.36	Cyrtella sp.	This study	13.08	0.3	10.325	This study / Angiolini et al. 2003, 2008				13.08
OM-34	100	OM34-31	Sakmarian	Saiwan Fm.	Oman		292.56	0.36	292.56	0.36	Subansiria cf. anti	This study	12.7	0.3	9.83374	This study / Angiolini et al. 2003, 2008				12.7
BP-242.9		BP-3b	Sakmarian	Bianping section	China		292.526	0.28202	292.526	0.28202	Martinia?					Wang et al., 2021		0.707789		4.59	-2.91	Preserved
BP-242.9		BP-3a	Sakmarian	Bianping section	China		292.526	0.28202	292.526	0.28202	Martinia?					Wang et al., 2021				4.61	-3.22
OM-35	101	OM35-18	Sakmarian	Saiwan Fm.	Oman		292.376	0.379215	292.376	0.379215	Pachycyrtella sp.	This study	12.79	0.3	9.9501	This study / Angiolini et al. 2003, 2008				12.79
OM-35	102	OM35-24	Sakmarian	Saiwan Fm.	Oman		292.376	0.379215	292.376	0.379215	Cyrtella sp.	This study	12.61	0.3	9.71739	This study / Angiolini et al. 2003, 2008				12.61
OL-15		OL-15-2	Sakmarian	Saiwan Fm	Oman		292.376	0.379215	292.376	0.379215	Neospirifer sp.	Joachimski et al. (2005)	10.3	0.25	6.73096	Joachimski et al. 2005
OL-15		OL-15-1	Sakmarian	Saiwan Fm	Oman		292.376	0.379215	292.376	0.379215	Neospirifer sp.	Joachimski et al. (2005)	10.1	0.25	6.4724	Joachimski et al. 2005
OL-15		OL15-15	Sakmarian		Oman		292.376	0.379215	292.376	0.379215	Derbyia haroubi					Angiolini et al. 2008				1.3	-2.5
OL-15		OL15-23	Sakmarian		Oman		292.376	0.379215	292.376	0.379215	Derbyia haroubi					Angiolini et al. 2008				2.8	-3.1
OL-15		OL15-48	Sakmarian		Oman		292.376	0.379215	292.376	0.379215	Punctocyrtella spinosa					Angiolini et al. 2008		0.707799	1.4e-05	4.9	-2.3
OL-15		OL15-63	Sakmarian		Oman		292.376	0.379215	292.376	0.379215	Punctocyrtella spinosa					Angiolini et al. 2008		0.707806	1.4e-05	5	-2.3
OL-15		OL15-81	Sakmarian		Oman		292.376	0.379215	292.376	0.379215	Cyrtella sp. A					Angiolini et al. 2008		0.707803	1.4e-05	4.6	-1.9
OL-15		OL15-88	Sakmarian		Oman		292.376	0.379215	292.376	0.379215	Neospirifer (Quadrospira) aff. hardmani					Angiolini et al. 2008		0.707801	1.4e-05	4.9	-1.4
RST27		RST27	Sakmarian			292.31			292.31		Kalitvella sokolovi	Legett et al. (2020)	11.09	1.5	7.75229	Legett et al. 2020 / Grossman et al. 2008				5.05	-2.11
RST27C		RST27C	Sakmarian			292.31			292.31		Kalitvella sokolovi	Legett et al. (2020)	17.5	3	16.0393	Legett et al. 2020 / Grossman et al. 2008				5.05	-2.11
RST27T		RST27T	Sakmarian			292.31			292.31		Kalitvella sokolovi	Legett et al. (2020)	10.55	1.5	7.05417	Legett et al. 2020 / Grossman et al. 2008				5.05	-2.11
RST29		RST29	Sakmarian			292.31			292.31		Kalitvella sokolovi	Legett et al. (2020)	11.88	1.5	8.77363	Legett et al. 2020 / Grossman et al. 2008				5.47	-2.32
OM-27bis	97	OM27bis31	Sakmarian	Saiwan Fm.	Oman		292.276	0.3	292.276	0.3	Pachycyrtella sp.	This study	11.69	0.3	8.52799	This study / Angiolini et al. 2003, 2008				11.69
OM-27bis	98	OM27bis32	Sakmarian	Saiwan Fm.	Oman		292.276	0.38	292.276	0.38	Pachycyrtella sp.	This study	12.87	0.3	10.0535	This study / Angiolini et al. 2003, 2008				12.87
ru10		ru10	Asselian	Southern Urals	Russia		292.207	0.686321	292.207	0.686321						Korte et al. 2006 Veizer et al. 1999	0.70792	0.707909	6e-06	4.34	-1.45
BP-251.9		BP-43b	Sakmarian	Bianping section	China		292.184	0.304552	292.184	0.304552	Martinia?					Wang et al., 2021				5.45	-3.13
BP-251.9		BP-43a	Sakmarian	Bianping section	China		292.184	0.304552	292.184	0.304552	Martinia?					Wang et al., 2021		0.707751		5.31	-3.09	Preserved
BP-264.1		BP-52	Sakmarian	Bianping section	China	291.9			291.9		Athyridida					Wang et al., 2021				4.45	-3.69
ch43		ch43	Sakmarian	Longyin, Puan County/Guizhou Province	China		291.824	0.616578	291.824	0.616578	Pseudofusulina					Vollstaedtet al. 2014	0.7075	0.707506	1e-06	2.21	-7.18
OM-46		OM46-14	Sakmarian		Oman		291.812	0.394433	291.812	0.394433	Punctocyrtella spinosa					Angiolini et al. 2008				0.5	-0.7
OM-46		OM46-16	Sakmarian		Oman		291.812	0.394433	291.812	0.394433	Punctocyrtella spinosa					Angiolini et al. 2008				0.7	-1.3
OM-46		OM46-17	Sakmarian		Oman		291.812	0.394433	291.812	0.394433	Subansiria cf. anti					Angiolini et al. 2008		0.707817	1.4e-05	3.3	-0.5
BP-287.1		BP-17b	Sakmarian	Bianping section	China		291.501	0.324137	291.501	0.324137	Squamularia					Wang et al., 2021				4.15	-3.28
BP-287.1		BP-17c	Sakmarian	Bianping section	China		291.501	0.324137	291.501	0.324137	Squamularia					Wang et al., 2021		0.707757		4.2	-4.19	Preserved
BP-287.1		BP-17a	Sakmarian	Bianping section	China		291.501	0.324137	291.501	0.324137	Squamularia					Wang et al., 2021		0.707751		4.1	-3.44	Preserved
BP-287.1		BP-21c	Sakmarian	Bianping section	China		291.501	0.324137	291.501	0.324137	Ehonistities					Wang et al., 2021				4.91	-3.64
BP-287.1		BP-21b	Sakmarian	Bianping section	China		291.501	0.324137	291.501	0.324137	Ehonistities					Wang et al., 2021		0.70785		5.13	-3.53	Altered
BP-287.1		BP-21a	Sakmarian	Bianping section	China		291.501	0.324137	291.501	0.324137	Ehonistities					Wang et al., 2021		0.707802		4.83	-3.48	Altered
BP-287.1		BP-32a	Sakmarian	Bianping section	China		291.501	0.324137	291.501	0.324137	Parachoristites					Wang et al., 2021		0.707754		4.69	-3.82	Preserved
BP-287.1		BP-32-1	Sakmarian	Bianping section	China		291.501	0.324137	291.501	0.324137	Parachoristites					Wang et al., 2021				4.65	-3.72
AU-15-WH-B-1		Au-3	Sakmarian		Australia		291.254	0.370092	291.254	0.370092						Garbelli et al. 2019	0.70762	0.707622	5e-06	4.11	-1
AU-15-WH-B-1		Au-38b	Sakmarian		Australia		291.254	0.370092	291.254	0.370092						Garbelli et al. 2019	0.70752	0.707523	6e-06	5.66	-1.04
OM-47		OM47-23	Sakmarian		Oman		291.247	0.372603	291.247	0.372603	Neospirifer (Quadrospira) aff. hardmani					Angiolini et al. 2008		0.70778	1.4e-05	4.6	-2.2
OM-47		OM47-25	Sakmarian		Oman		291.247	0.372603	291.247	0.372603	Neospirifer (Quadrospira) aff. hardmani					Angiolini et al. 2008				3.1	-1.4
OM-47		OM47-43	Sakmarian		Oman		291.247	0.372603	291.247	0.372603	Neospirifer (Quadrospira) aff. hardmani					Angiolini et al. 2008				4.6	-1.8
OM-47		OM47-46	Sakmarian		Oman		291.247	0.372603	291.247	0.372603	Neospirifer (Quadrospira) aff. hardmani					Angiolini et al. 2008				4.6	-1.4
OM-47		OM47-47	Sakmarian		Oman		291.247	0.372603	291.247	0.372603	Neospirifer (Quadrospira) aff. hardmani					Angiolini et al. 2008				4.2	-1.7
BP-288.1		BP-60a	Sakmarian	Bianping section	China		291.162	0.300625	291.162	0.300625	Spiriferida					Wang et al., 2021		0.707747		4.55	-3.44	Preserved
BP-288.1		BP-60b	Sakmarian	Bianping section	China		291.162	0.300625	291.162	0.300625	Spiriferida					Wang et al., 2021		0.707752		4.57	-3.54	Preserved
ru1		ru1	Artinskian	Southern Urals	Russia		291.154	0.171997	291.154	0.171997						Korte et al. 2006 Veizer et al. 1999	0.70749	0.707475	7e-06	4.89	-3.25
ru20		ru20	Sakmarian	Southern Urals	Russia		291.067	0.218092	291.067	0.218092						Korte et al. 2006 Veizer et al. 1999	0.70759	0.707575	7e-06	3.97	-3.53
BP-290.1		BP-31a	Sakmarian	Bianping section	China		290.802	0.24996	290.802	0.24996	Parachoristites					Wang et al., 2021		0.707743		3.43	-3.46	Preserved
BP-290.1		BP-31b	Sakmarian	Bianping section	China		290.802	0.24996	290.802	0.24996	Parachoristites					Wang et al., 2021		0.707775		3.7	-3.7	Preserved
AU-15-WH-B-1	89	Au-38a	Sakmarian	Wasp Head	Australia		291.254	0.370092	290.76	0.370092	Sulciplica	This study	9.58	0.3	5.80013	Garbelli et al. 2019				5.7	-1.18
ru2		ru2	Artinskian	Southern Urals	Russia		290.744	0.184347	290.744	0.184347						Korte et al. 2006 Veizer et al. 1999	0.70749	0.707498	8e-06	2.12	-4.1
OM-48		OM48-11	Sakmarian-Artinskian		Oman		290.667	0.298117	290.667	0.298117	Subansiria cf. anti					Angiolini et al. 2008		0.707806	1.4e-05	5.4	-1.4
OM-48		OM48-4	Sakmarian-Artinskian		Oman		290.667	0.298117	290.667	0.298117	Punctocyrtella spinosa					Angiolini et al. 2008		0.707794	1.4e-05	4.6	-2.2
OM-48		OM48-7	Sakmarian-Artinskian		Oman		290.667	0.298117	290.667	0.298117	Neospirifer (Quadrospira) aff. hardmani					Angiolini et al. 2008		0.707775	1.4e-05	4.5	-0.5
ru22		ru22	Sakmarian	Southern Urals	Russia		290.563	0.214952	290.563	0.214952						Korte et al. 2006 / Korte et al. 2005		0.707626	2.5e-05	0.96	-4.71
AU-15-WH-B-2		Au-50	Sakmarian-Artinskian		Australia		290.519	0.417375	290.519	0.417375						Garbelli et al. 2019	0.70753	0.70753	5e-06	4.79	-0.84
BP-314.1		BP-36a	Sakmarian	Bianping section	China		290.458	0.200715	290.458	0.200715	unknown					Wang et al., 2021		0.707715		4.46	-3.68	Preserved
BP-314.1		BP-36c	Sakmarian	Bianping section	China		290.458	0.200715	290.458	0.200715	unknown					Wang et al., 2021				4.16	-3.76
BP-314.1		BP-36d	Sakmarian	Bianping section	China		290.458	0.200715	290.458	0.200715	unknown					Wang et al., 2021				4.21	-3.86
BP-314.1		BP-36b	Sakmarian	Bianping section	China		290.458	0.200715	290.458	0.200715	unknown					Wang et al., 2021		0.707707		4.1	-3.43	Preserved
ru3		ru3	Artinskian	Southern Urals	Russia		290.393	0.132283	290.393	0.132283						Korte et al. 2006 Veizer et al. 1999	0.70748	0.707463	6e-06	3.5	-3.43	C and O data from sample ru4 (same age)
AU-15-WH-B-4	85	Au-42a	Artinskian	Wasp Head	Australia		289.754	0.367317	289.754	0.367317	?Trigonotreta	This study	11.91	0.3	8.81241	Garbelli et al. 2019				6.37	-0.45
AU-15-WH-B-4	86	Au-42c	Artinskian	Wasp Head	Australia		289.754	0.367317	289.754	0.367317	?Trigonotreta	This study	10.88	0.3	7.4808	Garbelli et al. 2019	0.707518	0.707518	5e-06	6.83	-0.67
AU-15-WH-B-4		Au-42b	Artinskian		Australia		289.754	0.367317	289.754	0.367317						Garbelli et al. 2019	0.70752	0.707538	5e-06	6.83	-0.67
NL-1		Af-27-NL-1	Sakmarian-Artiskian	Afghanistan			288.201	1.91312	288.201	1.91312	Neospirifer					Popp et al. 1986	0.707278	0.707385	2.6e-05	-2.33	5.23
BP-337.5		BP-1a	Artinskian	Bianping section	China		288.087	0.734799	288.087	0.734799	Parachoristites					Wang et al., 2021		0.70745		6.42	-3.68	Preserved
BP-337.5		BP-1b	Artinskian	Bianping section	China		288.087	0.734799	288.087	0.734799	Parachoristites					Wang et al., 2021		0.707432		6.33	-3.64	Preserved
sb-Nor-4		sb-Nor-4	Artinskian	Gipshuken,-Svalbard			286.833	1.11565	286.833	1.11565						Korte et al. 2006 / Korte et al. 2005		0.70762	7e-06	4.24	-1.84
AU-15-SP-B-1	87	Au-33a	Kungurian	Snapper Point	Australia		282.899	0.860468	283.02	0.860468	Trigonotreta	This study	8.94	0.3	4.97272	Garbelli et al. 2019				6.92	-0.04
AU-15-SP-B-1	88	Au-33c	Kungurian	Snapper Point	Australia		282.899	0.860468	283.02	0.860468		This study	8.95	0.3	4.98565	Garbelli et al. 2019				6.4	0.13
AU-15-SP-B-1	80	Au-22a	Kungurian	Snapper Point	Australia		282.899	0.860468	282.899	0.860468	?Ingelarella	This study	9.52	0.3	5.72256	Garbelli et al. 2019	0.707247	0.707247	5e-06	6.83	0.05
AU-15-SP-B-1		Au-33b	Kungurian		Australia		282.899	0.860468	282.899	0.860468						Garbelli et al. 2019	0.70727	0.707271	5e-06	6.9	0.26
Ch-Sh-7		9a	Kungurian	Chisia-Shangsi section	China		282.175	0.734297	282.175	0.734297	Permocryptospirifer omeishanensis					Wang et al., 2021		0.70715		5.66	-3.89	Preserved
Ch-Sh-7		9b	Kungurian	Chisia-Shangsi section	China		282.175	0.734297	282.175	0.734297	Permocryptospirifer omeishanensis					Wang et al., 2021				6.21	-3.79
Ch-Sh-7		9c	Kungurian	Chisia-Shangsi section	China		282.175	0.734297	282.175	0.734297	Permocryptospirifer omeishanensis					Wang et al., 2021		0.707143		4.79	-4.08	Preserved
AU-15-SP-B-3		Au-39	Kungurian		Australia		281.134	0.952756	281.134	0.952756						Garbelli et al. 2019	0.70707	0.707074	4e-06	6.32	-2.37
Ch-Sh-6		10a	Kungurian	Chisia-Shangsi section	China		280.81	0.932784	280.81	0.932784	Permocryptospirifer omeishanensis					Wang et al., 2021				7.17	-3.69	Preserved
Ch-Sh-6		10c	Kungurian	Chisia-Shangsi section	China		280.81	0.932784	280.81	0.932784	Permocryptospirifer omeishanensis					Wang et al., 2021				8.26	-4.02
Ch-Sh-6		10d	Kungurian	Chisia-Shangsi section	China		280.81	0.932784	280.81	0.932784	Permocryptospirifer omeishanensis					Wang et al., 2021		0.707125		6.87	-3.99	Preserved
Ch-Sh-5		13a	Kungurian	Chisia-Shangsi section	China		279.553	1.04323	279.553	1.04323						Wang et al., 2021				6.84	-3.31
Ch-Sh-5		13b	Kungurian	Chisia-Shangsi section	China		279.553	1.04323	279.553	1.04323						Wang et al., 2021		0.707106		6.82	-3.15	Preserved
Ch-Sh-5		13c	Kungurian	Chisia-Shangsi section	China		279.553	1.04323	279.553	1.04323						Wang et al., 2021		0.707174		7.44	-3.67	Preserved
UNE-L1050	90	Au-61a	Kungurian	Snapper Point	Australia		279.427	0.830119	279.498	0.830119	?Ingelarella	This study	10.49	0.3	6.9766	Garbelli et al. 2019				8.6	-1.1
UNE-L1050	91	Au-61b	Kungurian	Snapper Point	Australia		279.427	0.830119	279.498	0.830119	?Ingelarella	This study	10.64	0.3	7.17052	Garbelli et al. 2019	0.707053	0.707053	5e-06	8.45	-0.88
UNE-L1050		AU-58b	Kungurian				279.427	0.830119	279.427	0.830119						Garbelli et al. 2019	0.70708	0.707078	5e-06	6.5	-2.3
UNE-L1050		AU-61b	Kungurian				279.427	0.830119	279.427	0.830119						Garbelli et al. 2019	0.70705	0.707053	5e-06	8.45	-0.88
AU-15-WW-B-5		Au-46b	Kungurian		Australia		279.375	0.790729	279.375	0.790729						Garbelli et al. 2019	0.70695	0.70695	5e-06	7.78	-0.28
AU-15-WW-B-6		Au-6	Kungurian		Australia		278.453	0.921581	278.453	0.921581						Garbelli et al. 2019	0.70696	0.706961	5e-06	6.94	0.41
Ch-Sh-4		7a	Kungurian	Chisia-Shangsi section	China		278.248	1.0867	278.248	1.0867	Permocryptospirifer omeishanensis					Wang et al., 2021				7.07	-3.88
Ch-Sh-4		7b	Kungurian	Chisia-Shangsi section	China		278.248	1.0867	278.248	1.0867	Permocryptospirifer omeishanensis					Wang et al., 2021		0.707113		8.46	-3.82	Preserved
Ch-Sh-4		7c	Kungurian	Chisia-Shangsi section	China		278.248	1.0867	278.248	1.0867	Permocryptospirifer omeishanensis					Wang et al., 2021		0.707111		7.7	-4.03	Preserved
NL-1		Ti-97-NL-1	Kungurian	Timor			277.958	1.77448	277.958	1.77448	C. purdoni					Popp et al. 1986	0.70687	0.706977	2.6e-05	-0.64	5.42
NL-1		Ti-83-NL-1	Kungurian	Timor			277.958	1.77448	277.958	1.77448	Martinia sp.					Popp et al. 1986	0.70687	0.706977	2.6e-05	0.09	6.06
AU-15-WW-B-1	70	Au-14a	Kungurian	Wandrawandian	Australia		280.325	0.603935	277.461	0.603935	Trigonotreta	This study	10.51	0.3	7.00246	Garbelli et al. 2019				7.57
AU-15-WW-B-1	71	Au-14b	Kungurian	Wandrawandian	Australia		280.325	0.603935	277.461	0.603935	Trigonotreta	This study				Garbelli et al. 2019	0.706946	0.706946	6e-06	7.3	-0.6
AU-15-WW-B-1	72	Au-14c	Kungurian	Wandrawandian	Australia		280.325	0.603935	277.461	0.603935	Trigonotreta	This study	10.76	0.3	7.32566	Garbelli et al. 2019				6.85	-0.57
AU-15-WW-B-1	76	Au-18c	Kungurian				280.325	0.603935	277.461	0.603935		This study				Garbelli et al. 2019	0.706944	0.706944	5e-06	6.78	0.55
AU-15-WW-B-7		Au-11c	Kungurian		Australia		277.407	1.01607	277.407	1.01607						Garbelli et al. 2019	0.70697	0.706978	5e-06	6.88	0.1
Ch-Sh-3		3a	Kungurian	Chisia-Shangsi section	China		276.909	1.04707	276.909	1.04707						Wang et al., 2021		0.707061		6.84	-3.81	Preserved
Ch-Sh-3		3b	Kungurian	Chisia-Shangsi section	China		276.909	1.04707	276.909	1.04707						Wang et al., 2021				6.01	-3.94
AU-15-WW-B-8		Au-1a	Kungurian		Australia		276.363	1.13593	276.363	1.13593						Garbelli et al. 2019	0.70693	0.706936	5e-06	7.5	0.52
AU-15-WW-B-8		Au-23b	Kungurian		Australia		276.363	1.13593	276.363	1.13593						Garbelli et al. 2019	0.70697	0.706966	5e-06	6.7	-0.09
TXP001		TXP001	Kungurian			275.96			275.96		Composita	Legett et al. (2020)	12.45	3	9.51054	Legett et al. 2020				2.86	-1.04
TXP001		TXP001	Kungurian			275.96			275.96		Composita	Legett et al. (2020)	18.43	3	17.2416	Legett et al. 2020				2.86	-1.04	altered/contaminated; discarded previously
TXP003		TXP003	Kungurian			275.96			275.96		Composita	Legett et al. (2020)	10.36	3	6.80853	Legett et al. 2020				4.63	-2.61
TXP005		TXP005	Kungurian			275.96			275.96		Neospirifer	Legett et al. (2020)	11.41	3	8.166	Legett et al. 2020 / Grossman et al. 2008				3.9	-2.42
TXP005		TXP005	Kungurian			275.96			275.96		Neospirifer	Legett et al. (2020)	11.88	3	8.77363	Legett et al. 2020 / Grossman et al. 2008				3.9	-2.42
TXP005		TXP005	Kungurian			275.96			275.96		Neospirifer	Legett et al. (2020)	10.85	3	7.44202	Legett et al. 2020				3.9	-2.42
TXP006		TXP006	Kungurian			275.96			275.96		Neospirifer	Legett et al. (2020)	12.21	3	9.20026	Legett et al. 2020				4.12	-3.16
TXP007A		TXP007A	Kungurian			275.96			275.96		Neospirifer	Legett et al. (2020)	11.46	3	8.23064	Legett et al. 2020				4.25	-2.35
TXP007B		TXP007B	Kungurian			275.96			275.96		Neospirifer	Legett et al. (2020)	11.95	3	8.86412	Legett et al. 2020				4.25	-2.35
SS6-96-12		SS6-96-12	Kungurian			275.81			275.81		Stenoscisma mutabilis	Legett et al. (2020)	9.32	1.5	5.46399	Legett et al. 2020
Ch-Sh-2		4a	Kungurian	Chisia-Shangsi section	China		275.638	0.96229	275.638	0.96229	Titanothyris striata					Wang et al., 2021		0.707086		9.15	-3.61	Preserved
Ch-Sh-2		4b	Kungurian	Chisia-Shangsi section	China		275.638	0.96229	275.638	0.96229	Titanothyris striata					Wang et al., 2021		0.707079		9.15	-3.63	Preserved
Ch-Sh-2		4c	Kungurian	Chisia-Shangsi section	China		275.638	0.96229	275.638	0.96229	Titanothyris striata					Wang et al., 2021				8.43	-3.96
T-10-959.9		T-10-959.9	Kungurian				275.577	0.241708	275.577	0.241708						Morante 1999	0.70713	0.70712	1.1e-05	6.33	-0.96
AU-15-WW-B-9		Au-49	Kungurian		Australia		275.36	1.18314	275.36	1.18314						Garbelli et al. 2019	0.70695	0.706954	5e-06	7.71	-1.43
T-10-952.39		T-10-952.39	Kungurian				275.136	0.324221	275.136	0.324221						Morante 1999	0.70709	0.70708	1.1e-05	6.9	-1.4
E-5-1316.2		E-5-1316.2	Kungurian				275.099	0.454127	275.099	0.454127						Morante 1999	0.70719	0.70718	1.1e-05	5.5	-2.7
T-10-926.8		T-10-926.8	Kungurian				274.682	0.373262	274.682	0.373262						Morante 1999	0.7071	0.70709	1.1e-05	5.62	-0.08
AU-15-WW-B-10		Au-43b	Kungurian		Australia		274.408	1.23346	274.408	1.23346						Garbelli et al. 2019	0.70698	0.706983	6e-06	7.5	-0.81
Ch-Sh-1		12a	Kungurian	Chisia-Shangsi section	China		274.259	0.744512	274.259	0.744512						Wang et al., 2021		0.707029		7.75	-3.79	Preserved
Ch-Sh-1		12b	Kungurian	Chisia-Shangsi section	China		274.259	0.744512	274.259	0.744512						Wang et al., 2021		0.707047		8.21	-3.86	Preserved
T-10-897.2		T-10-897.2	Kungurian				274.196	0.406331	274.196	0.406331						Morante 1999	0.70706	0.70705	1.1e-05	6.96	-1.19
E-5-1219.3		E-5-1219.3	Kungurian				274.134	0.573868	274.134	0.573868						Morante 1999	0.70711	0.7071	1.1e-05	4.4	-2.5
T-10-884.4		T-10-884.4	Kungurian				273.737	0.425262	273.737	0.425262						Morante 1999	0.70706	0.70705	1.1e-05	6.9	0.3
AU-15-WW-B-12		Au-10	Kungurian		Australia		273.455	1.27231	273.455	1.27231						Garbelli et al. 2019	0.70696	0.706964	5e-06	8.05	-0.43
T-10-868.8		T-10-868.8	Kungurian				273.255	0.424014	273.255	0.424014						Morante 1999	0.70705	0.70704	1.1e-05	5.3	-2.4
E-5-1210.6		E-5-1210.6	Kungurian				273.231	0.554838	273.231	0.554838						Morante 1999	0.70709	0.70708	1.1e-05	6.52	-0.73
WKJ	18	WKJb-2	Kungurian-Roadian	Wadi Khawr al Jaramah	Oman		273.015	0.364265	273.015	0.364265	Callytharrella websteri	This study	12.9693	0.2	10.1819	This study	0.707304	0.707304	3.93486e-05	3.20324	-2.27282
WKJ	19	WKJb-2	Kungurian-Roadian	Wadi Khawr al Jaramah	Oman		273.015	0.364265	273.015	0.364265	Callytharrella websteri	This study	13.0826	0.2	10.3283	This study	0.707312	0.707312	1.6e-05
WKJ	20	WKJf-7	Kungurian-Roadian	Wadi Khawr al Jaramah	Oman		273.015	0.364265	273.015	0.364265	Aequalicosta sp.	This study				This study				4.07847	-2.59327
WKJ	21	WKJf-7	Kungurian-Roadian	Wadi Khawr al Jaramah	Oman		273.015	0.364265	273.015	0.364265	Aequalicosta sp.	This study				This study
WKJ	22	WKJe-55	Kungurian-Roadian	Wadi Khawr al Jaramah	Oman		273.015	0.364265	273.015	0.364265	Squamularia marcouxi	This study	13.3174	0.2	10.6319	This study	0.707277	0.707277	1.5e-05
WKJ	23	WKJf-11	Kungurian-Roadian	Wadi Khawr al Jaramah	Oman		273.015	0.364265	273.015	0.364265	Martinia sp.	This study	12.1636	0.2	9.14029	This study				5.07149	-1.54572
WKJ	24	WKJf-11	Kungurian-Roadian	Wadi Khawr al Jaramah	Oman		273.015	0.364265	273.015	0.364265	Martinia sp.	This study				This study
WKJ	25	WKJf-35	Kungurian-Roadian	Wadi Khawr al Jaramah	Oman		273.015	0.364265	273.015	0.364265	Cartorhium aff. multiradiatus	This study	14.2025	0.2	11.7762	This study	0.707268	0.707268	1.5e-05
WKJ	26	WKJf-35	Kungurian-Roadian	Wadi Khawr al Jaramah	Oman		273.015	0.364265	273.015	0.364265	Cartorhium aff. multiradiatus	This study	13.8898	0.2	11.372	This study	0.707268	0.707268	1.5e-05
JX	27	JX3-4	upper Kungurian-lower Roadian near the Cisuralian-Guadalupian boundary (Kungurian-Roadian), possibly going a bit into Roadian	Jebel X		274-272			273		Calliprotonia sp.	This study				This study				1.99231	-3.95277
JX	28	JX3-4	upper Kungurian-lower Roadian near the Cisuralian-Guadalupian boundary (Kungurian-Roadian), possibly going a bit into Roadian	Jebel X		274-272			273		Calliprotonia sp.	This study	12.4935	0.2	9.5668	This study
JX	29	JX3-4	upper Kungurian-lower Roadian near the Cisuralian-Guadalupian boundary (Kungurian-Roadian), possibly going a bit into Roadian	Jebel X		274-272			273		Calliprotonia sp.	This study	12.758	0.2	9.90877	This study
WKJ	30	WKJb-22	upper Kungurian-lower Roadian near the Cisuralian-Guadalupian boundary (Kungurian-Roadian), possibly going a bit into Roadian	Wadi Khawr al Jaramah	Oman	274-272			273		Transennatia insculpta	This study				This study
WKJ	31	WKJb-22	upper Kungurian-lower Roadian near the Cisuralian-Guadalupian boundary (Kungurian-Roadian), possibly going a bit into Roadian	Wadi Khawr al Jaramah	Oman	274-272			273		Transennatia insculpta	This study	12.6647	0.2	9.78815	This study
WKJ	32	WKJd-40	upper Kungurian-lower Roadian near the Cisuralian-Guadalupian boundary (Kungurian-Roadian), possibly going a bit into Roadian	Wadi Khawr al Jaramah	Oman	274-272			273		Cleiothyridina sp.	This study	12.6309	0.2	9.74441	This study				3.89259	-2.03116
WKJ	33	WKJd-56	upper Kungurian-lower Roadian near the Cisuralian-Guadalupian boundary (Kungurian-Roadian), possibly going a bit into Roadian	Wadi Khawr al Jaramah	Oman	274-272			273		Retimarginifera auricolata	This study	12.3762	0.2	9.41509	This study
WKJ	34	WKJd-56	upper Kungurian-lower Roadian near the Cisuralian-Guadalupian boundary (Kungurian-Roadian), possibly going a bit into Roadian	Wadi Khawr al Jaramah	Oman	274-272			273		Retimarginifera auricolata	This study				This study
WKJ	35	WKJd-6	upper Kungurian-lower Roadian near the Cisuralian-Guadalupian boundary (Kungurian-Roadian), possibly going a bit into Roadian	Wadi Khawr al Jaramah	Oman	274-272			273		Aequalicosta sp.	This study				This study
WKJ	36	WKJd-6	upper Kungurian-lower Roadian near the Cisuralian-Guadalupian boundary (Kungurian-Roadian), possibly going a bit into Roadian	Wadi Khawr al Jaramah	Oman	274-272			273		Aequalicosta sp.	This study				This study				3.93923	-1.81619
WKJ	37	WKJd-6	upper Kungurian-lower Roadian near the Cisuralian-Guadalupian boundary (Kungurian-Roadian), possibly going a bit into Roadian	Wadi Khawr al Jaramah	Oman	274-272			273		Aequalicosta sp.	This study				This study
WKJ	38	WKJd-8	upper Kungurian-lower Roadian near the Cisuralian-Guadalupian boundary (Kungurian-Roadian), possibly going a bit into Roadian	Wadi Khawr al Jaramah	Oman	274-272			273		Caricula sp.	This study	12.5154	0.2	9.59504	This study
WKJ	39	WKJd-8	upper Kungurian-lower Roadian near the Cisuralian-Guadalupian boundary (Kungurian-Roadian), possibly going a bit into Roadian	Wadi Khawr al Jaramah	Oman	274-272			273		Caricula sp.	This study				This study
WKJ	40	WKJf-3	upper Kungurian-lower Roadian near the Cisuralian-Guadalupian boundary (Kungurian-Roadian), possibly going a bit into Roadian	Wadi Khawr al Jaramah	Oman	274-272			273		Spiriferella posterosulcata	This study				This study				4.22277	-2.18068
WKJ	41	WKJf-3	upper Kungurian-lower Roadian near the Cisuralian-Guadalupian boundary (Kungurian-Roadian), possibly going a bit into Roadian	Wadi Khawr al Jaramah	Oman	274-272			273		Spiriferella posterosulcata	This study				This study				3.31123	-2.97217
WKJ	42	WKJf-36	upper Kungurian-lower Roadian near the Cisuralian-Guadalupian boundary (Kungurian-Roadian), possibly going a bit into Roadian	Wadi Khawr al Jaramah	Oman	274-272			273		Cartorhium aff. multiradiatus	This study	13.7309	0.2	11.1665	This study
WKJ	43	WKJf-36	upper Kungurian-lower Roadian near the Cisuralian-Guadalupian boundary (Kungurian-Roadian), possibly going a bit into Roadian	Wadi Khawr al Jaramah	Oman	274-272			273		Cartorhium aff. multiradiatus	This study	13.6038	0.2	11.0022	This study				4.1571	-1.53882
WKJ	44	WKJf-36	upper Kungurian-lower Roadian near the Cisuralian-Guadalupian boundary (Kungurian-Roadian), possibly going a bit into Roadian	Wadi Khawr al Jaramah	Oman	274-272			273		Cartorhium aff. multiradiatus	This study	13.983	0.2	11.4925	This study
WKJ	45	WKJf-36	upper Kungurian-lower Roadian near the Cisuralian-Guadalupian boundary (Kungurian-Roadian), possibly going a bit into Roadian	Wadi Khawr al Jaramah	Oman	274-272			273		Cartorhium aff. multiradiatus	This study				This study				3.93812	-2.10742
WKJ	46	WKJe-29B	upper Kungurian-lower Roadian near the Cisuralian-Guadalupian boundary (Kungurian-Roadian), possibly going a bit into Roadian	Wadi Khawr al Jaramah	Oman	274-272			273		Stenoscisma qararensis	This study	12.7622	0.2	9.91413	This study				4.07709	-2.87604
WKJ	47	WKJe-29B	upper Kungurian-lower Roadian near the Cisuralian-Guadalupian boundary (Kungurian-Roadian), possibly going a bit into Roadian	Wadi Khawr al Jaramah	Oman	274-272			273		Stenoscisma qararensis	This study				This study
E-1-947		E-1-947	Roadian						273							Morante 1999	0.70709	0.70708	1.1e-05	6.8	-1.6
E-1-937		E-1-937	Roadian				272.927	0.657097	272.927	0.657097						Morante 1999	0.7071	0.70709	1.1e-05	6.34	-1.76
T-10-845.25		T-10-845.25	Roadian				272.786	0.38996	272.786	0.38996						Morante 1999	0.70696	0.70695	1.1e-05	4.3	-2.8
AU-15-WW(HB)-B-14	81	Au-27a	Roadian	Wandrawandian	Australia		271.49	1.20534	272.718	1.20534	?Ingelarella	This study	11.22	0.3	7.92036	This study				6.93	0.95
AU-15-WW(HB)-B-14	82	Au-27b	Roadian	Wandrawandian	Australia		271.49	1.20534	272.718	1.20534	?Ingelarella	This study	10.99	0.3	7.62301	This study				6.67	0.88
AU-15-WW(HB)-B-14	83	Au-27c	Roadian	Wandrawandian	Australia		271.49	1.20534	272.718	1.20534	?Ingelarella	This study	11.35	0.3	8.08843	Garbelli et al. 2019	0.706914	0.706914	5e-06	6.57	0.71
AU-15-WW(HB)-B-13		Au-13a	Roadian		Australia		272.493	1.21536	272.493	1.21536						Garbelli et al. 2019	0.70687	0.706881	5e-06	5.96	-2.84
T-10-838.2		T-10-838.2	Roadian				272.306	0.339847	272.306	0.339847						Morante 1999	0.707	0.70699	1.1e-05	4.2	-1.3
E-5-1196.84		E-5-1196.84	Roadian				272.306	0.465809	272.306	0.465809						Morante 1999	0.70711	0.7071	1.1e-05	7.6	-1
T-10-831.25		T-10-831.25	Roadian				271.872	0.258253	271.872	0.258253						Morante 1999	0.70693	0.70692	1.1e-05	3.5	-3.4
GM-1		GM-1	Roadian				271.821	0.592989	271.821	0.592989						Korte et al. 2006 / Korte et al. 2005		0.707116	7e-06	2.65	-1.97
AU-15-WW(HB)-B-14		Au-9	Roadian		Australia		271.49	1.20534	271.49	1.20534						Garbelli et al. 2019	0.7069	0.706909	5e-06	6.09	0.5
E-5-972.59		E-5-972.59	Roadian				270.898	0.388514	270.898	0.388514						Morante 1999	0.70706	0.70705	1.1e-05	4.3	-1.2
UQ-L5124		UQ-L5124	Roadian				270.81	0.26421	270.81	0.26421						Morante 1999	0.70708	0.70707	1.1e-05	5.46	1.46
SC-60		SC-60	Roadian				270.607	0.747249	270.607	0.747249						Korte et al. 2006 / Korte et al. 2005		0.707142	7e-06	3.56	-1.93
AU-15-WW(CB)-15		Au-8	Roadian		Australia		270.471	1.12912	270.471	1.12912						Garbelli et al. 2019	0.70695	0.706952	5e-06	6.12	0.32
WSP370		WSP370	Roadian			270.2			270.2		Spiriferella polaris	Legett et al. (2020)	8.13	3	3.92553	Legett et al. 2020 / Mii et al. 1997				7.6	-4.5
WSP370		WSP370	Roadian			270.2			270.2		Spiriferella polaris	Legett et al. (2020)	8.4	3	4.2746	Legett et al. 2020 / Mii et al. 1997				7.6	-4.5
WSP370T		WSP370T	Roadian			270.2			270.2		Spiriferella polaris	Legett et al. (2020)	10.71	1.5	7.26102	Legett et al. 2020 / Mii et al. 1997				7.6	-4.5
UQ-L5129		UQ-L5129	Roadian				270.174	0.261139	270.174	0.261139						Morante 1999	0.70698	0.70697	1.1e-05	4.7	-0.51
AU-15-WW(CB)-16		Au-12b	Roadian		Australia		269.426	1.03865	269.426	1.03865						Garbelli et al. 2019	0.70692	0.706931	5e-06	6.67	-0.7
AU-15-WW(CB)-16		Au-2	Roadian		Australia		269.426	1.03865	269.426	1.03865						Garbelli et al. 2019	0.70692	0.706928	5e-06	6.33	0.3
AU-15-WW(CB)-16		Au-4	Roadian		Australia		269.426	1.03865	269.426	1.03865						Garbelli et al. 2019	0.70691	0.706912	5e-06	6.44	-1.17
upper-Cutoff		upper-Cutoff	Roadian				269.374	0.7558	269.374	0.7558						Korte et al. 2006 / Korte et al. 2005		0.707064	7e-06	2.9	-2.94
Ru15		Ru15	Roadian			269			269		Licharewia refulata	Legett et al. (2020)	9.77	3	6.04577	Legett et al. 2020 / Popp 1986				3.35	0.95	d11B error from Legett et al. 2020
Ru15 Popp		Ru15 Popp	Roadian			269			269		Licharewia refulata	Legett et al. (2020)	13.09	3	10.3379	Legett et al. 2020 / Popp 1986				3.35	0.95
NL-1		Ru-17-NL-1	Roadian, Kazanian	Russia (Kazan)			268.593	1.62536	268.593	1.62536	Licharawaregulata					Popp et al. 1986	0.70718	0.707287	2.6e-05	1.48	3.88
AU-15-WW(CB)-B-18		Au-40b	Roadian		Australia		268.42	0.961296	268.42	0.961296						Garbelli et al. 2019	0.70694	0.706939	5e-06	6.51	0.39
BC-12		BC-12	Roadian				268.11	0.593361	268.11	0.593361						Korte et al. 2006 / Korte et al. 2005		0.707102	8e-06	2.97	-2.06
AU-15-WW(CB)-B-19		Au-15a	Roadian		Australia		267.422	0.783719	267.422	0.783719						Garbelli et al. 2019	0.70691	0.706917	5e-06	7.14	-1.58
AU-15-WW(CB)-B-19		Au-32a	Roadian		Australia		267.422	0.783719	267.422	0.783719						Garbelli et al. 2019	0.70691	0.706913	5e-06	6.54	-1.37
UNE-L933	92	Au-62a	Roadian	Nowra Sandstone	Australia		267.305	0.250924	267.305	0.250924	Glendonia	This study	10.88	0.3	7.4808	This study				5.72	0.58
UNE-L933	93	Au-62b	Roadian	Nowra Sandstone	Australia		267.305	0.250924	267.305	0.250924	Glendonia	This study	10.74	0.3	7.29981	Garbelli et al. 2019	0.706951	0.706951	5e-06	5.66	0.47
UNE-L933		AU-63	Roadian				267.305	0.250924	267.305	0.250924						Garbelli et al. 2019	0.7069	0.706898	5e-06	6.7	-0.52
XK-840		Xk-175	Roadian	Yangshan-Wulipo	China		267.038	0.435362	267.038	0.435362	Permophricodothyris					Wang et al., 2021	0.707123	0.707123		4.66	-2.29	Preserved
XK-867		Xk-36a	Wordian	Yangshan-Wulipo	China	266.7			266.7		Monticuliferi					Wang et al., 2021	0.70709	0.70709		4.73	-1.97	Altered
XK-867		Xk-36b	Wordian	Yangshan-Wulipo	China	266.7			266.7		Monticuliferi					Wang et al., 2021				5.08	-1.56
XK-872		Xk-205	Wordian	Yangshan-Wulipo	China	266.65			266.65		Unknown					Wang et al., 2021				4.66	-1.75
JB-12	94	Au-67a	Wordian	Berry Siltstone	Australia		266.511	0.1741	266.511	0.1741	Trigonotreta	This study	12.24	0.3	9.23904	This study				5.06	-0.18
JB-12	95	Au-67b	Wordian	Berry Siltstone	Australia		266.511	0.1741	266.511	0.1741	Trigonotreta	This study	9.57883	0.3	5.79862	This study
JB-12	96	Au-67c	Wordian	Berry Siltstone	Australia		266.511	0.1741	266.511	0.1741	Trigonotreta	This study	10.97	0.3	7.59716	This study				4.49	0.23
JB-12		AU-67b	Wordian				266.511	0.1741	266.511	0.1741						Garbelli et al. 2019	0.70692	0.706924	5e-06	5.06	-0.48
JB-12		AU-68b	Wordian				266.511	0.1741	266.511	0.1741						Garbelli et al. 2019	0.70692	0.706923	5e-06	4.99	-1.19
JB-12		AU-69b	Wordian				266.511	0.1741	266.511	0.1741						Garbelli et al. 2019	0.70691	0.706907	5e-06	5.6	0.6
JB-12		AU-70b	Wordian				266.511	0.1741	266.511	0.1741						Garbelli et al. 2019	0.70688	0.706879	5e-06	5.57	-0.53
AU-15-WW-PH-B-20	84	Au-41b	Wordian	Wandrawandian	Australia		266.473	0.574684	266.473	0.574684	Large fragment-Unknown	This study	10.3	0.3	6.73096	This study				6.15	0.15
AU-15-WW-PH-B-20		Au-41c	Wordian				266.473	0.574684	266.473	0.574684						Garbelli et al. 2019	0.7069	0.706903	5e-06	5.96	0.03
XK-892		Xk-38	Wordian	Yangshan-Wulipo	China	266.3			266.3		Juxathyris					Wang et al., 2021				5.66	-2.09
XK-913		Xk-34	Wordian	Yangshan-Wulipo	China		266.062	0.433918	266.062	0.433918	Monticuliferi					Wang et al., 2021	0.707045	0.707045		3.56	-1.71	Preserved
XK-913		Xk-37a	Wordian	Yangshan-Wulipo	China		266.062	0.433918	266.062	0.433918	Monticuliferi					Wang et al., 2021	0.707059	0.707059		2.38	-2.17	Altered
XK-913		Xk-37b	Wordian	Yangshan-Wulipo	China		266.062	0.433918	266.062	0.433918	Monticuliferi					Wang et al., 2021				5.02	-1.06
GMN-15		GMN-15	Wordian				265.981	0.39093	265.981	0.39093						Korte et al. 2006 / Korte et al. 2005		0.707038	7e-06	5.43	-1.31
AU-15-BR(BH)-B-1		Au-37b	Wordian		Australia		265.805	0.104855	265.805	0.104855						Garbelli et al. 2019	0.70674	0.706745	5e-06	5.43	-0.33
AU-15-BR(BH)-B-2	77	Au-21a	Wordian	Broughton Formation	Australia		265.594	0.128478	265.594	0.128478	Ingelarella	This study	10.46	0.3	6.93782	This study				5.85	0.01
AU-15-BR(BH)-B-2	78	Au-21b	Wordian	Broughton Formation	Australia		265.594	0.128478	265.594	0.128478	Ingelarella	This study				This study				6.02	0.67
AU-15-BR(BH)-B-2	79	Au-21c	Wordian	Broughton Formation	Australia		265.594	0.128478	265.594	0.128478	Ingelarella	This study	10.34	0.3	6.78268	This study				5.17	0.71
AU-15-BR(BH)-B-2		Au-5b	Wordian		Australia		265.594	0.128478	265.594	0.128478						Garbelli et al. 2019	0.70684	0.706839	5e-06	5.63	0.83
AU-15-BR(BH)-B-3		Au-47c	Wordian		Australia		265.397	0.12486	265.397	0.12486						Garbelli et al. 2019	0.70685	0.706853	5e-06	6.13	-0.32
AU-15-BR(BH)-B-3		Au-7b	Wordian		Australia		265.397	0.12486	265.397	0.12486						Garbelli et al. 2019	0.70684	0.706846	5e-06	4.85	-1.06
AU-15-BR(BH)-B-4	73	Au-16a	Wordian	Broughton Formation	Australia		265.193	0.100225	265.193	0.100225	Ingelarella	This study				This study				5.33	-1.77
AU-15-BR(BH)-B-4	74	Au-16b	Wordian	Broughton Formation	Australia		265.193	0.100225	265.193	0.100225	Ingelarella	This study	10.12	0.3	6.49825	Garbelli et al. 2019	0.706858	0.706858	5e-06	6.12	-1
AU-15-BR(BH)-B-4	75	Au-16c	Wordian	Broughton Formation	Australia		265.193	0.100225	265.193	0.100225	Ingelarella	This study	10.41	0.3	6.87317	This study				6.2	-0.41
GMN-13		GMN-13	Wordian				265.15	0.384742	265.15	0.384742						Korte et al. 2006 / Korte et al. 2005		0.706985	1.7e-05	5.88	-1.89

## Sheet: data our samples
Supplementary Data to Jurikova et al. 'Rapid rise in atmospheric CO2 marked the end of the Late Palaeozoic Ice Age'. Data S1 Carboniferous-Permian geochemical data compilation. New brachiopod C, O, Sr and B measured in this study.																			(µmol/mol)	(µmol/mol)	(mmol/mol)	(mmol/mol)	(µmol/mol)	(µmol/mol)	(mmol/mol)	(µmol/mol)	(µmol/mol)	(nmol/mol)	(µmol/mol)
Horizon	Number	Sample	Stage	Formation	Country	Age_Ma (from stratigraphic position)	Age_Ma (from Sr model)	Age_90 confidence interval	Age_Ma combined (preferred Sr, where unavailable using stratigraphy)	Age_90 confidence interval	Species	Fabric	Preservation	Tertiary layer	Preservation	Silicification	d11B	d11B_excluded	Li/Ca	B/Ca	Mg/Ca	Sr/Ca	Ba/Ca	U/Ca	Na/Ca	Mn/Ca	Fe/Ca	Nd/Ca	Al/Ca	Comments on d11B and TE sample	Sr87_corr	SD	d13C	d18O
8	106	30AO2B/30AO2-Sr	late Visean	Pathhead Fm.	UK		334.29	0.36	334.29	0.36	?Orthida	?Columnar					16.7373													Unit 1 = Horizon 1, the youngest, numbers increase with age (from now on inverted)	0.707971	1.5e-05
8	107	30AO1-Sr-3	late Visean	Pathhead Fm.	UK		334.29	0.36	334.29	0.36	?Orthida	?Columnar																			0.707947	1.6e-05
8	108	30AO2/30AO21	late Visean	Pathhead Fm.	UK		334.29	0.36	334.29	0.36	?Orthida	?Columnar					16.4183		1.95873	134.292	5.11708	0.412149	1.52738	100.302	0.561804	177.403		0.826763	21.2999		0.707972	1.52726e-05
8	109	30AO22	late Visean	Pathhead Fm.	UK		334.29	0.36	334.29	0.36	?Orthida	?Columnar					16.57		1.50833	112.207	5.78603	0.392731	1.53849	17.1628	0.578585	175.552		0.120847	9.026
8	110	30AP11	late Visean	Pathhead Fm.	UK		334.29	0.36	334.29	0.36	Productus	Laminar					15.5528		4.56179	614.089	9.21788	1.17051	3.39709	159.07	1.84712	349.613		0.718751	115.083		0.707895	1.64292e-05
8	111	30AP1-Sr	late Visean	Pathhead Fm.	UK		334.29	0.36	334.29	0.36	Productus	Laminar																			0.707894	1.6e-05
8	112	30AC2-Sr	late Visean	Pathhead Fm.	UK		334.29	0.36	334.29	0.36	Camarotoechia	?Columnar																			0.707917	1.6e-05
8	113	30AC1-Sr-4	late Visean	Pathhead Fm.	UK		334.29	0.36	334.29	0.36	Camarotoechia	?Columnar																			0.707984	1.6e-05
8	114	30AO1-Sr	late Visean	Pathhead Fm.	UK		334.29	0.36	334.29	0.36	?Orthida	?Columnar																			0.707948	1.62712e-05
8	115	30AC1-Sr	late Visean	Pathhead Fm.	UK		334.29	0.36	334.29	0.36	Camarotoechia	?Columnar																			0.707985	1.6014e-05
8	116	30AC2-Sr	late Visean	Pathhead Fm.	UK		334.29	0.36	334.29	0.36	Camarotoechia	?Columnar																			0.707918	1.59472e-05
8	117	30AT1-Sr	late Visean	Pathhead Fm.	UK		334.29	0.36	334.29	0.36	Terebratulida	?Columnar																			0.708127	1.436e-05
8	118	30AT1-Sr	late Visean	Pathhead Fm.	UK		334.29	0.36	334.29	0.36	Terebratulida	?Columnar																			0.708133	1.59622e-05
8	119	TR1.1	late Visean	Pathhead Fm.	UK		334.29	0.36	334.29	0.36	Productus	Laminar	Good				16.3845		6.2124	554.779	6.28913	0.934917	6.14309	137.619	2.7567	346.192		3.03351	119.625
8	120	TR1.2	late Visean	Pathhead Fm.	UK		334.29	0.36	334.29	0.36	Productus	Laminar	Good				16.3267		8.95784	502.306	7.81152	0.935644	6.30424	236.787	3.32419	281.439		1.61872	50.3836		0.707884	2.37475e-05
8	121	TR1.3	late Visean	Pathhead Fm.	UK		334.29	0.36	334.29	0.36	Productus	Laminar	Good				16.2683		6.3805	575.835	6.67174	0.896361	5.27477	288.506	2.76728	381.601		2.32258	24.9147		0.707892	2.13432e-05
7	122	TR2.6	late Visean	Pathhead Fm.	UK		333.61	0.45	333.61	0.45	Rhynchonella	Fibrous	Altered to apparent aragonite						22.5973	244.453	4.72673	0.917467	0.93143	12.0843	3.6797	902.984		1.32246	17.3653		0.707848	2.88929e-05
7	123	TR2.7	late Visean	Pathhead Fm.	UK		333.61	0.45	333.61	0.45	Productus	Laminar	Pristine				16.2516		11.6904	1366.11	13.1796	1.7289	11.0595	15.3226	5.14875	990.952		2.89731	37.4907	Mn elevated	0.707827	2.13437e-05
7	124	TR2.16	late Visean	Pathhead Fm.	UK		333.61	0.45	333.61	0.45	Rhynchonella	Fibrous	Altered to apparent aragonite						29.4285	295.616	3.75578	1.20001	3.44745	35.3775	4.45066	355.117		3.45942	15.909		0.707836	2.23174e-05
7	125	TR2.11	late Visean	Pathhead Fm.	UK		333.61	0.45	333.61	0.45	Rhynchonella	Fibrous	Altered to apparent aragonite					17.6768	19.7287	158.181	2.80459	1.02535	2.75938	16.6708	3.01384	332.025		4.1031	11.1539	recrystallised
7	126	TR2.15	late Visean	Pathhead Fm.	UK		333.61	0.45	333.61	0.45		Fibrous	Altered to apparent aragonite					16.9789	20.4489	156.463	3.2039	1.04619	2.62516	11.5176	3.15124	290.748		2.49188	9.36469	recrystallised
7	127	TR2.3	late Visean	Lower Limestone Fm.	UK		333.61	0.45	333.61	0.45	Strophomenida	Fibrous	Altered to apparent aragonite					18.1332	18.8617	293.155	5.10124	1.17387	9.07169	13.3855	4.15129	726.326		3.26305	26.2803	recrystallised
7	128	TR2.8	late Visean	Lower Limestone Fm.	UK		333.61	0.45	333.61	0.45	Rhynchonella	Fibrous	Altered to apparent aragonite					17.353	21.2828	245.106	8.31121	0.979806	4.19705	34.6291	4.00092	1496.5		5.95819	41.1021	recrystallised
7	129	TR2.14	late Visean	Lower Limestone Fm.	UK		333.61	0.45	333.61	0.45	Rhynchonella	Fibrous	Altered to apparent aragonite					17.3321	20.0598	169.902	5.59444	1.03153	3.23216	40.172	3.48227	606.153		7.80777	43.0161	recrystallised
7	130	TR2.17	late Visean	Lower Limestone Fm.	UK		333.61	0.45	333.61	0.45	?Streptorhynchus	Fibrous	Altered to apparent aragonite					19.9894	15.0489	173.576	3.28217	0.97714	20.2969	23.6612	3.00611	741.835		2.30977	14.6332	recrystallised
7	123b	TR2.7	late Visean	Pathhead Fm.	UK		333.61	0.45	333.61	0.45	Productus	Laminar	Pristine				16.1282
7	129b	TR2.14	late Visean	Lower Limestone Fm.	UK		333.61	0.45	333.61	0.45	Rhynchonella	Fibrous	Altered to apparent aragonite					17.363	23.0026	228.305	8.9035	1.125	4.12759	53.7468	4.45454	624.249	3360.74	13.1025	81.5764	recrystallised
6	131	TR3.1	late Visean	Lower Limestone Fm.	UK		332.9	0.49	332.9	0.49	Productus	Laminar	Good				16.4737		11.3063	1398.4	9.43257	1.90238	9.40546	4.31746	5.97279	415.568		0.636629	7.8495		0.707857	2.31183e-05
6	132	TR3.7	late Visean	Lower Limestone Fm.	UK		332.9	0.49	332.9	0.49	Productus	Laminar	Good				15.8104		10.1606	1200.31	10.3883	1.80637	10.9214	41.0437	5.58207	1291.55		3.29429	38.7083	reatively co nsistent d11B across a range of Mn/Ca
6	133	TR3.9	late Visean	Lower Limestone Fm.	UK		332.9	0.49	332.9	0.49	Productus	Laminar	Good				16.2979		8.71799	1176.12	9.72381	1.63004	12.5223	86.9455	4.75136	1475.4		11.748	32.674	reatively co nsistent d11B across a range of Mn/Ca	0.707862	2.17069e-05
6	134	TR3.10	late Visean	Lower Limestone Fm.	UK		332.9	0.49	332.9	0.49	Productus	Laminar	Good				16.0981		10.5159	1451.5	11.0349	1.82083	10.3955	22.7016	5.70732	750.466		3.29799	13.9967	reatively co nsistent d11B across a range of Mn/Ca
6	135	TR3.6	late Visean	Lower Limestone Fm.	UK		332.9	0.49	332.9	0.49	Productus	Laminar	Good				15.9322		9.16423	1150.92	9.35873	1.63351	123.481	180.522	4.92906	2714.01		9.95543	130.608	reatively co nsistent d11B across a range of Mn/Ca
6	286	6.1_1A	late Visean	Lower Limestone Fm., Kinghorn-Kirkcaldy, First Abden	UK		332.9	0.49	332.9	0.49			Very good					17.8868	25.8015	319.007	7.19459	1.00902	0.972772	52.833	4.6165	372.255	270.589	0.524453	63.4881	?	0.707818	1.47595e-05
6	287	7.1_2A	late Visean	Lower Limestone Fm., Kinghorn-Kirkcaldy, Second Abden	UK		332.9	0.49	332.9	0.49			Very good				15.5932		6.1387	71.3905	15.684	0.837081	2.62097	127.704	1.75255	630.025	1130.11	2.60385	6.45572	Fe and Mn elevated but variable, other TE also variable but consistent d11B
6	288	9.1_1A	late Visean	Lower Limestone Fm., Kinghorn-Kirkcaldy, First Abden	UK		332.9	0.49	332.9	0.49			Very good				16.6739		26.0878	270.975	18.5717	1.12316	13.3683	197.215	6.01308	1083.42	1296.13	0.343484	47.156
6	289	9.2_1A	late Visean	Lower Limestone Fm., Kinghorn-Kirkcaldy, First Abden	UK		332.9	0.49	332.9	0.49			Very good						8.98581	617.011	7.87285	1.0397	4.05303	410.928	3.25415	2099.43	698.472	0.758641	105.647
6	290	10.1_2A	late Visean	Lower Limestone Fm., Kinghorn-Kirkcaldy, Second Abden	UK		332.9	0.49	332.9	0.49			Very good				15.8379		37.1882	516.346	16.9561	1.28161	1.59031	36.9223	7.65008	2014.43	1124.6	1.54755	26.0754	Fe and Mn elevated but variable, other TE also variable but consistent d11B
6	291	10.2_2A	late Visean	Lower Limestone Fm., Kinghorn-Kirkcaldy, Second Abden	UK		332.9	0.49	332.9	0.49			Acceptable						8.76345	1167.79	9.44776	1.60426	9.85013	23.0723	4.91289	1588.92	686.227	2.34584	6.89914
6	292	10.3_2A	late Visean	Lower Limestone Fm., Kinghorn-Kirkcaldy, Second Abden	UK		332.9	0.49	332.9	0.49			Acceptable						10.6993	2153.7	8.61811	1.77199	5.11177	12.3416	6.28016	718.284	647.74	0.799154	9.2484		0.707869	1.48214e-05
6	293	10.4_2A	late Visean	Lower Limestone Fm., Kinghorn-Kirkcaldy, Second Abden	UK		332.9	0.49	332.9	0.49			Acceptable						6.64712	1057.56	8.24609	1.58314	5.18416	18.4553	4.23367	1059.35	551.608	1.85262	8.40908
6	294	11.1_2A	late Visean	Lower Limestone Fm., Kinghorn-Kirkcaldy, Second Abden	UK		332.9	0.49	332.9	0.49			Very good				16.7406		35.3166	473.33	14.2974	1.22045	1.49152	38.9772	7.05368	1182.29	674.702	1.16913	32.3574
6	295	11.2_2A	late Visean	Lower Limestone Fm., Kinghorn-Kirkcaldy, Second Abden	UK		332.9	0.49	332.9	0.49			Very good						5.60014	815.72	10.1955	1.46633	4.70524	9.71568	3.52767	1524.93			39.0345
6	296	11.3_2A	late Visean	Lower Limestone Fm., Kinghorn-Kirkcaldy, Second Abden	UK		332.9	0.49	332.9	0.49			Very good						6.1762	895.831	9.44127	1.45988	5.74103	42.9003	3.81314	3637.11			36.171
6	297	11.4_2A	late Visean	Lower Limestone Fm., Kinghorn-Kirkcaldy, Second Abden	UK		332.9	0.49	332.9	0.49			Acceptable						15.3005	1392.79	12.9608	1.59357	3.67206	6.70458	6.43427	1337.1	448.108	2.76761	12.2266
6	298	12_2A	late Visean	Lower Limestone Fm., Kinghorn-Kirkcaldy, Second Abden	UK		332.9	0.49	332.9	0.49			Acceptable						10.3585	1224.5	7.25943	1.43842	3.94629	39.4683	5.11363	3074.43	272.481	0.318508	12.0178		0.707799	1.60003e-05
6	299	15_2AK	late Visean	Lower Limestone Fm., Kinghorn-Kirkcaldy, Second Abden	UK		332.9	0.49	332.9	0.49			Altered					30.02	78.6143	463.257	868.884	0.233077	11.4992	504.673	2.79585	5785.26	24281.5	12.9964	2327.96	poor preservation and Mg, Mn and Fe high, not well preserved
6	131b	TR3.1A	late Visean	Lower Limestone Fm.	UK		332.9	0.49	332.9	0.49	Productus	Laminar	Good				16.4939
6	135b	TR3.6	late Visean	Lower Limestone Fm.	UK		332.9	0.49	332.9	0.49	Productus	Laminar	Good				16.2387
IBL	12	IB001	late Visean	Ible	UK		332.455	0.248865	332.455	0.248865	Latibrachythyris cf. crassa	columnar layer					18.6182		5.25936	232.938	2.1957	0.945248	3.26382	43.5948	1.46488	40.7535		0.0977585	17.4804		0.707817	1.5e-05
IBL	13	IB060	late Visean	Ible	UK		332.455	0.248865	332.455	0.248865	Gigantoproductus okensis	columnar layer						19.2226	5.24486	109.053	8.53585	0.425247	3.36169	1625.39	1.00461	860.515		0.135507	3.59429	high U/Ca and Mn/Ca	0.707834	1.4e-05
IBL	14	IBL115	late Visean	Ible	UK		332.455	0.248865	332.455	0.248865	Latibrachythyris cf. crassa	Fibrous	Good, locally altered	yes	good		18.325		9.68271	244.452	3.33266	0.942577	0.383056	10.3825	2.2103	29.9589		0.0306648	6.24487		0.707822	1.4e-05
IBL	15	IBL116	late Visean	Ible	UK		332.455	0.248865	332.455	0.248865	Latibrachythyris cf. crassa	columnar layer					16.184		14.8623	577.859	5.44941	1.13229	0.428163	3.04726	3.2262	23.4561		0.00976936	1.90773		0.707832	1.5e-05
IBL	16	IBL122	late Visean	Ible	UK		332.455	0.248865	332.455	0.248865	Latibrachythyris cf. crassa	Fibrous	Good, locally altered	yes	good		16.3572		12.3388	890.391	6.74882	8.27149	4.2804	49.2286	6.74882	48.4991	32.1181	0.453502	29.4775		0.707821	1.5e-05	2.88058	-1.87654
IBL	17	IBL122	late Visean	Ible	UK		332.455	0.248865	332.455	0.248865	Latibrachythyris cf. crassa	Fibrous	Good, locally altered	yes	good			19.0922	5.14162	132.125	3.20284	0.862663	92.426	123.544	1.04338	70.8587		0.369909	335.309	dubious sampling
IBL	16b	IBL122	late Visean	Ible	UK		332.455	0.248865	332.455	0.248865	Latibrachythyris cf. crassa	Fibrous	Good, locally altered	yes	good																		2.22006	-4.19772
4	138	TR5.3	late Visean	Lower Limestone Fm.	UK		332.23	0.46	332.23	0.46	Productus	Laminar	Good				16.5616		11.9005	1031.79	14.3169	1.73455	10.1839	22.7935	5.32607	431.206		4.46565	18.1245		0.707888	2.16638e-05
4	139	TR5.1	late Visean	Lower Limestone Fm.	UK		332.23	0.46	332.23	0.46	Productus	Laminar	Good				16.2041		13.1516	1130.02	10.2481	1.81905	11.3738	6.55925	5.3842	283.062		2.74881	15.3436	?
4	140	TR5.2	late Visean	Lower Limestone Fm.	UK		332.23	0.46	332.23	0.46	Productus	Laminar	Good				16.6905		13.7266	975.155	11.1469	1.75049	7.95661	8.47328	5.51562	164.418		2.71209	50.9142
4	141	TR5.4	late Visean	Lower Limestone Fm.	UK		332.23	0.46	332.23	0.46	Productus	Laminar	Good				16.4842		14.0864	1008.61	12.951	1.74935	10.0709	20.7257	5.63936	633.446		5.57883	14.8774
OAW	7	OAW23-1	late Visean	Once a week	UK		331.934	0.289523	331.934	0.289523	Gigantoproductus elongatus	Laminar	Good	yes	good, locally altered	limited	16.1884		7.87748	288.233	8.06825	0.678171	3.00376	34.9471	1.87084	176.099		0.236251	0.72384		0.707904	1.5e-05
OAW	8	OAW23-2	late Visean	Once a week	UK		331.934	0.289523	331.934	0.289523	Gigantoproductus elongatus	Laminar	Good	yes	good, locally altered	limited															0.707844	1.4e-05
OAW	9	OAW23-3	late Visean	Once a week	UK		331.934	0.289523	331.934	0.289523	Gigantoproductus elongatus	Laminar	Good	yes	good, locally altered	limited															0.707875	1.5e-05
OAW	10	OAW203-1	late Visean	Once a week	UK		331.934	0.289523	331.934	0.289523	Gigantoproductus elongatus	columnar layer	Good				16.67		18.2607	627.402	12.9915	1.23682	1.62137	2.91641	4.55788	12.0891		0.033878	1.30685		0.707858	1.6e-05
OAW	11	OAW203-2	late Visean	Once a week	UK		331.934	0.289523	331.934	0.289523	Gigantoproductus elongatus	columnar layer	Good																		0.707856	1.5e-05
3	272	3.2_BS	late Visean	Lower Limestone Fm., Fife Quarries, Roscobie	UK		331.56	0.35	331.56	0.35			Acceptable				16.2942		2.18005	1742.52	7.4086	1.79964	17.0862	33.3842	5.9458	366.511	443.284	0.62911	109.565		0.707879	1.50114e-05
3	273	3.2_WP	late Visean	Lower Limestone Fm., Fife Quarries, Roscobie	UK		331.56	0.35	331.56	0.35			Acceptable						2.86257	1020.86	12.6753	1.1582	17.4552	15.1956	3.0141	1683.37			27.1697
3	274	3.2_FL	late Visean	Lower Limestone Fm., Fife Quarries, Roscobie	UK		331.56	0.35	331.56	0.35			Acceptable						3.17505	1348.18	13.4317	1.49349	21.5058	39.2912	4.50348	1086.53			137.326
3	275	3.3SR	late Visean	Lower Limestone Fm., Fife Quarries, Roscobie	UK		331.56	0.35	331.56	0.35			Acceptable				16.4165		15.9681	3767.18	26.4936	0.129529	87.1889	193.017	102.875	274.544	4985.02	0.661744	10560.5	consistent d11B across a range of TE	0.707901	1.39955e-05
3	276	3.3.4R	late Visean	Lower Limestone Fm., Fife Quarries, Roscobie	UK		331.56	0.35	331.56	0.35			Acceptable				16.4187		2.88908	1259.12	9.23834	1.63443	17.9023	31.8213	5.0578	697.061			65.8169	consistent d11B across a range of TE
3	277	5.1_1H1	late Visean	Lower Limestone Fm., Ayrshire Quarries, Hessilhead	UK		331.56	0.35	331.56	0.35			Exceptional				16.4283		5.87819	778.729	15.3429	1.3092	2.44614	73.1861	4.5534	991.848			27.4932	consistent d11B across a range of TE
3	278	5.1_1H2	late Visean	Lower Limestone Fm., Ayrshire Quarries, Hessilhead	UK		331.56	0.35	331.56	0.35			Acceptable						5.71964	1818.74	15.5243	1.58706	5.86001	53.3996	5.26081	991.301			43.5844
3	279	5.1_2H	late Visean	Lower Limestone Fm., Ayrshire Quarries, Hessilhead	UK		331.56	0.35	331.56	0.35			Very good				16.4611		5.52362	694.164	13.7065	1.29647	5.54783	16.0256	4.22815	383.144	918.508	0.0645709	20.455		0.707851	1.5323e-05
3	280	5.1_3H	late Visean	Lower Limestone Fm., Ayrshire Quarries, Hessilhead	UK		331.56	0.35	331.56	0.35			Acceptable						8.09155	1124.59	12.0072	1.48032	2.72309	10.063	6.15815	414.67			10.6901
3	281	5.1_7H	late Visean	Lower Limestone Fm., Ayrshire Quarries, Hessilhead	UK		331.56	0.35	331.56	0.35			Acceptable						5.61298	1638.67	11.9502	1.64657	7.5875	34.7369	6.19806	855.455			29.0276
3	282	5.1_8H	late Visean	Lower Limestone Fm., Ayrshire Quarries, Hessilhead	UK		331.56	0.35	331.56	0.35			Acceptable						3.72825	1290.82	8.94427	1.57129	5.88026	20.8693	5.39481	708.838	1019.09	0.500674	8.74332		0.70785	1.53566e-05
3	283	5.1_9H	late Visean	Lower Limestone Fm., Ayrshire Quarries, Hessilhead	UK		331.56	0.35	331.56	0.35			Acceptable						6.11712	1902.45	12.0745	1.76242	7.35281	44.9653	6.29741	304.32			158.406
3	284	5.2_T1	late Visean	Lower Limestone Fm., Ayrshire Quarries, Trearne	UK		331.56	0.35	331.56	0.35			Very good					17.7108	20.6149	283.585	6.64812	0.961709	1.16519	6.89065	5.01448	220.302	548.362	0.129587	6.82712	?	0.707853	1.46368e-05
3	285	5.2_T2	late Visean	Lower Limestone Fm., Ayrshire Quarries, Trearne	UK		331.56	0.35	331.56	0.35			Very good					17.7397	22.0292	369.083	6.93989	1.02748	1.23009	7.6007	5.34296	198.163			8.61997	?
RCK	1	RCK21b	late Visean	Ricklow	UK		331.431	0.252874	331.431	0.252874	Angiospirifer sp.	Fibrous	Good	yes	good		16.784		3.21376	28.7853	3.23219	0.644528	1.20523	23.6799	0.787457	13.7507		0.119265	23.0701		0.70782	1.4e-05
RCK	2	RCK28	late Visean	Ricklow	UK		331.431	0.252874	331.431	0.252874	Gigantoproductus inflatus	Laminar	Good	yes	good	limited	17.3751		16.5968	525.022	4.54281	19.4151	2.4743	2.92182	4.54281	10.5053	6.86479	0.0061635	0.618165		0.707849	2.44468e-05	3.4131	-2.98667
RCK	3	RCK28	late Visean	Ricklow	UK		331.431	0.252874	331.431	0.252874	Gigantoproductus inflatus	Laminar	Good	yes	good	limited	17.4967		12.7884	488.426	19.5707	1.26372	1.72331	4.78333	3.73225	15.3502		0.00873991	911.365	high Al/Ca, but does not not translate to variable B/Ca and d11B	0.707849	1.5e-05
RCK	4	RCK42c	late Visean	Ricklow	UK		331.431	0.252874	331.431	0.252874	Angiospirifer sp.	Fibrous	Good	yes	good		17.4927		3.70991	43.6348	1.383	3.33998	1.05332	294.161	1.383	16.5078	6.29164	0.133771	2.03612		0.707861	1.18633e-05	3.41067	-3.45091
RCK	5	RCK42c	late Visean	Ricklow	UK		331.431	0.252874	331.431	0.252874	Angiospirifer sp.	Fibrous	Good	yes	good			15.6879	4.32771	20.2232	11.8284	0.638891	1.81899	1387.81	0.111407	151.526		0.729651	36.7255	high U/Ca	0.707851	1.6e-05
RCK	6	RCK221	late Visean	Ricklow	UK		331.431	0.252874	331.431	0.252874	Gigantoproductus inflatus	columnar layer	Good				16.6571		17.3593	636.088	15.3164	1.30321	1.72485	5.02841	4.58214	11.7265		0.174483	46.0759		0.707854	1.6e-05
CAR	65	CAR5-3	upper Visean-Serpukhovian age	Tonka Fm., Carlin Canyon, Nevada	USA				330.9		Marginatia sp						15.8458		4.12926	1402.98	3.74737	7.84166	84.7716	180.711	3.74737	16.4375	182.192	0.224719	16.3067		0.707691	8.71058e-06	2.27767	-2.25778
CAR	66	CAR5-26	upper Visean-Serpukhovian age	Tonka Fm., Carlin Canyon, Nevada	USA				330.9		Anthracospirifer shawi shawi						15.6282		24.4961	1038.53	5.15771	7.68627	132.045	73.6822	5.15771	49.5313	309.248	0.172459	4.28733		0.707708	7.89983e-06	2.36615	-2.19103
IR501-8	Ptextended-261	IR501-8	Serpukhovian	Dozdehband	Iran	330-327	328.505	0.529807	328.505	0.529807	Frechella sp.	fibrous	good	yes	good	no	15.8717		22.4258	431.908	3.95644	1.16223	0.707221	29.9393	6.33286	46.5704	718.273	0.0739912	15.9907		0.707891	1.10622e-05	2.74874	-0.8038
IR502-1	Ptextended-266	IR502-1	Serpukhovian	Dozdehband	Iran	330-327	328.505	0.529807	328.505	0.529807	?Frechella sp.	fibrous	locally altered	yes	good	no	14.5385		19.4885	478.758	4.45828	1.63102	77.1	10.7413	8.49376	35.2402	582.581	0.0901319	16.9969		0.707902	9.14312e-06
IR502-33	Ptextended-267	IR502-33	Serpukhovian	Dozdehband	Iran	330-327	328.505	0.529807	328.505	0.529807	Echinoconchus sp.	laminar	locally altered	yes	good	no	17.8864		9.26272	273.594	30.6262	1.37585	112.141	9.3278	3.3357	38.2271	575.733	0.102005	3.54567		0.707936	1.48782e-05
IR502-24	Ptextended-268	IR502-24	Serpukhovian	Dozdehband	Iran	330-327	328.505	0.529807	328.505	0.529807	Echinoconchus sp.	laminar	good	yes	good	no	16.0262		5.47124	967.778	9.53125	1.66545	7.83598	27.6645	5.22408	111.028	1518.2	1.19188	14.7618		0.707933	8.51812e-06
IR502-20	Ptextended-269	IR502-20	Serpukhovian	Dozdehband	Iran	330-327	328.505	0.529807	328.505	0.529807	Frechella sp.	fibrous	locally altered	yes	good	no	13.9287		10.3189	372.966	5.05595	1.91995	15.465	34.1502	7.02187	86.7493	1120.61	0.361047	35.4027		0.707922	9.36093e-06	2.12499	-2.71014
IR501-9	Ptextended-270	IR501-9	Serpukhovian	Dozdehband	Iran	330-327	328.505	0.529807	328.505	0.529807	?Rhynchotetra sp.	fibrous	good	yes	good	no	16.3932		7.13384	42.4935	2.99782	0.685378	0.406685	11.5436	1.95879	18.9884	157.114	0.282003	32.6886		0.707877	9.92741e-06	2.22446	-0.87732
IR517-8	Ptextended-262	IR517-8	early Moscovian	Qezelqaleh	Iran	315-311	313.599	0.573867	313.599	0.573867	Derbyia sp.	laminar					14.4323		3.41853	176.712	19.4066	0.474571	2.10967	458.399	1.92761	3534.81	1333.73	2.30838	91.9173		0.708462	1.21854e-05
IR517-6	Ptextended-264	IR517-6	early Moscovian	Qezelqaleh	Iran	315-311	313.599	0.573867	313.599	0.573867	?	?					15.4937		9.17166	357.241	2.28655	0.745689	1.04513	14.8253	3.52921	62.6894	140.89	0.163292	6.47267		0.708335	8.42713e-06
IR940-1	Ptextended-263	IR940-1	early Moscovian	Qezelqaleh	Iran	315-311	312.309	0.588631	312.309	0.588631	Choristites sp.	fibrous	good	yes	good	no	15.8748		4.82646	274.868	1.65017	0.660773	0.988572	7.13817	2.45295	31.367	119.581	0.0819069	0.949022		0.708338	9.82008e-06	4.23939	-1.23244
XK-82.4	67	Xk-28c	Moscovian	from Yangshan to Wulipo	China				311.028	1.51486	Choristites	columnar					16.3		0.83244	13.0764	2.68548	0.516854	0.785355	0.00985535	0.249215	3.67493	75.019	45.4587	161.085		0.708271
AJ	48	AJ39b-12	Moscovian	Jandaq Fm.	Iran	307-315			310		Choristites aff. mosquensis	Fibrous	Heavily altered	?	\	No		7.7035	0.640478	183.992	3.18942	1.77608	126.737	0.886529	0.754675	154.517	63.6548	0.327377	1.30438	altered
AJ	49	AJ58-37	Moscovian	Jandaq Fm.	Iran	307-315			310		?Choristites sp.	Fibrous	Altered	Yes	?	No		13.2607	0.263396	17.7456	2.35266	0.429121	0.907128	0.73692	0.958309	209.071	60.5131	0.0602217	3.09462	altered
AJ	50	AJ58-37	Moscovian	Jandaq Fm.	Iran	307-315			310		?Choristites sp.	Fibrous	Altered	Yes	?	No	16.1796		0.249035	22.3773	2.46938	0.457027	1.64547	1.06231	1.08489	219.107	86.6913	0.085646	1.68117				4.42752	-4.88283
AJ	51	AJ58-73	Moscovian	Jandaq Fm.	Iran	307-315			310			Fibrous	Locally altered	Yes	Very good	Limited to the secondary			0.24338	16.6869	2.18662	0.43407	0.784663	5.89373	0.854545	305.847	87.7699	0.156571	4.677		0.708207	1.51875e-05
AJ	52	AJ58-75	Moscovian	Jandaq Fm.	Iran	307-315			310			Fibrous, intercalated	Good	Yes	Very good	No	16.7768		0.32834	112.253	2.5119	0.524418	1.74788	2.46555	1.49094	197.262	83.7274	0.169509	10.7054		0.708254	1.21612e-05	3.93093	-6.38156
AJ	53	AJ58-85	Moscovian	Jandaq Fm.	Iran	307-315			310			Fibrous	Good	Yes	Good	No	16.4326		0.290521	23.1312	2.3153	0.462623	0.606111	3.07109	1.00875	197.13	99.2784	0.101427	-1.30606		0.708226	9.11201e-06
AJ	54	AJ58-93	Moscovian	Jandaq Fm.	Iran	307-315			310		Choristites aff. mosquensis	Fibrous	Altered	Yes	Good	No	16.1832		0.278972	24.7149	2.67596	0.458766	2.77894	1.61475	1.1817	107.435	46.0281	0.0537528	1.36192
AJ	55	AJ58-93	Moscovian	Jandaq Fm.	Iran	307-315			310		Choristites aff. mosquensis	Fibrous	Altered	Yes	Good	No	15.6388		0.224136	18.672	2.61423	0.421872	1.09078	1.72066	0.970346	134.804	50.1101	0.0707399	3.22531
AJ	56	AJ77-8	Moscovian	Jandaq Fm.	Iran	307-315			310		?Choristites sp.	\	\	Yes	Good	No	15.4538		0.291077	18.0196	2.93721	0.460314	1.61252	3.89392	1.04459	266.948	111.477	0.206441	2.52507
IR946-6	Ptextended-271	IR946-6	Gzhelian	Toyeh	Iran	303-300	301.504	0.528238	301.504	0.528238	Neospirifer sp.	fibrous	practically absent	yes	overall good	no	15.7775		13.774	239.719	8.54935	0.58031	2.91517	57.3235	4.46089	7579.43	825.72	4.05209	51.3172		0.708487	9.8455e-06	4.52356	1.63811
XK-189.3	68	Xk-43c	Asselian	from Yangshan to Wulipo	China				296.185	0.745329	Spiriferida	columnar					17.01		0.481039	14.4036	3.07216	0.397435	0.465368	0.00356063	0.322617	8.12431	34.1085	40.5866	35.5929		0.707807
IR52-128	Ptextended-265	IR52-128	middle Asselian	Emarat	Iran	295-297	295.981	0.366846	295.981	0.366846	Larispirifer fantinisestinii	fibrous	locally altered	yes	good	limited	14.5317		2.18308	67.6335	11.1282	0.621286	1.91937	451.876	0.518495	546.025	7779.94	1.22312	31.6625		0.708138	9.30373e-06
XK-200.4	69	Xk-40c	Asselian	from Yangshan to Wulipo	China				294.861	0.633259	Spiriferida	columnar							0.428547	15.605	3.81799	0.366944	0.309018	0.00430996	0.495703	4.24387	33.3744	40.2825	59.81		0.707814
OL-14	103	OL14-1	Sakmarian	Saiwan Fm.	Oman				292.924	0.301233	Pachycyrtella omanensis						12.41		45.4144	789.221	4.61211	0.911477	1.68687	0.00814023	6.62543	125.542	116.071	233.149	175.858
OL-14	104	OL14-30	Sakmarian	Saiwan Fm.	Oman				292.924	0.301233	Pachycyrtella omanensis						12.28		38.8496	1151.47	4.22704	0.952083	1.85582	0.00541823	6.56126	76.8484	47.1638	109.809	11.056
OL-14	105	OL14-K	Sakmarian	Saiwan Fm.	Oman				292.924	0.301233	Pachycyrtella omanensis								25.7874	249.759	4.83457	1.13746	9.536	0.0111537	3.22142	394.959	388.874	2841.33	1291.72
OM-34	99	OM34-19	Sakmarian	Saiwan Fm.	Oman				292.56	0.36	Cyrtella sp.						13.08		41.1017	860.071	4.51187	0.826863	1.04659	0.00575775	6.02863	103.272	156.325	231.84	91.7253
OM-34	100	OM34-31	Sakmarian	Saiwan Fm.	Oman				292.56	0.36	Subansiria cf. anti						12.7		52.1705	898.733	5.73262	0.914815	1.39723	0.00846445	7.5514	295.596	303.126	531.52	159.01
OM-35	101	OM35-18	Sakmarian	Saiwan Fm.	Oman				292.376	0.379215	Pachycyrtella sp.						12.79		49.0101	693.839	6.47532	0.829376	2.94049	0.00885475	7.27248	99.3065	256.412	184.714	408.719
OM-35	102	OM35-24	Sakmarian	Saiwan Fm.	Oman				292.376	0.379215	Cyrtella sp.						12.61		55.942	879.197	6.244	0.870028	1.71169	0.00826421	7.86911	100.659	149.553	49.943	15.7117
OM-27bis	97	OM27bis31	Sakmarian	Saiwan Fm.	Oman				292.276	0.3	Pachycyrtella sp.						11.69		53.1285	1228.26	9.60039	0.993299	1.17372	0.0114708	8.40049	78.6851	127.885	65.9345	22.7814
OM-27bis	98	OM27bis32	Sakmarian	Saiwan Fm.	Oman				292.276	0.38	Pachycyrtella sp.						12.87		48.8114	797.994	6.77715	0.838959	0.683132	0.00654807	7.32368	57.8869	125.931	9.03221	14.2332
AU-15-WH-B-1	89	Au-38a	Sakmarian	Wasp Head	Australia				290.76	0.370092	Sulciplica	Columnar					9.58		5.31748	649.533	2.80001	1.76096	19.6291	0.00420541	5.74686	20.7103	274.63	29.8468	86.2017
AU-15-WH-B-4	85	Au-42a	Artinskian	Wasp Head	Australia				289.754	0.367317	?Trigonotreta	Fibrous					11.91		5.43407	704.876	5.60864	1.10895	3983.63	0.123275	8.327	82.0549	288.368	2350.3	274.33
AU-15-WH-B-4	86	Au-42c	Artinskian	Wasp Head	Australia				289.754	0.367317	?Trigonotreta	Columnar					10.88		10.3653	656.405	3.38877	1.35569	1554.74	0.00601724	4.57582	20.9292	163.314	114.45	207.449		0.707518	5e-06
AU-15-SP-B-1	87	Au-33a	Kungurian	Snapper Point	Australia				283.02	0.860468	Trigonotreta	Columnar					8.94		8.6558	993.39	2.1196	1.27762	1.94645	0.00159073	4.69563	24.7617	85.1058	11.3018	45.8542
AU-15-SP-B-1	88	Au-33c	Kungurian	Snapper Point	Australia				283.02	0.860468							8.95		15.998	966.23	3.12152	1.24554	2.50274	0.0499653	5.04016	91.5977	294.258	37.2451	62.9384
AU-15-SP-B-1	80	Au-22a	Kungurian	Snapper Point	Australia				282.899	0.860468	?Ingelarella	Columnar					9.52		10.6566	847.124	3.23507	1.1832	3.02076	0.18472	4.02272	23.3289	334.726	125.415	289.081		0.707247	5e-06
UNE-L1050	90	Au-61a	Kungurian	Snapper Point	Australia				279.498	0.830119	?Ingelarella	Columnar					10.49		11.8102	877.374	2.66964	0.845248	4.67609	0.0633749	4.14545	29.6235	233.082	336.208	492.778
UNE-L1050	91	Au-61b	Kungurian	Snapper Point	Australia				279.498	0.830119	?Ingelarella	Columnar					10.64		14.5103	1043.24	2.16252	0.869562	2.35333	0.0188829	3.85711	24.8574	117.683	141.876	120.152		0.707053	5e-06
AU-15-WW-B-1	70	Au-14a	Kungurian	Wandrawandian	Australia				277.461	0.603935	Trigonotreta	Fibrous					10.51		14.0564	411.663	2.78061	0.80287	2.18869	0.0052397	4.74682	54.8905	643.099	203.794	807.963
AU-15-WW-B-1	71	Au-14b	Kungurian	Wandrawandian	Australia				277.461	0.603935	Trigonotreta	Columnar						11.06	19.9912	601.815	3.03539	1.00437	169.867	0.018077	4.42795	27.4571	1379.24	908.78	1594.54	high Fe/Ca and Al/Ca	0.706946	6e-06
AU-15-WW-B-1	72	Au-14c	Kungurian	Wandrawandian	Australia				277.461	0.603935	Trigonotreta	Columnar					10.76		4.76773	465.541	1.96484	1.08982	3.12768	0.00348115	4.17017	29.8372	96.6716	89.6061	60.9855
AU-15-WW-B-1	76	Au-18c	Kungurian						277.461	0.603935																					0.706944	5e-06
WKJ	18	WKJb-2	Kungurian-Roadian	Wadi Khawr al Jaramah	Oman		273.015	0.364265	273.015	0.364265	Callytharrella websteri	Laminar	Good	yes	good	Heavy	12.9693		16.3567	746.863	4.60946	10.1665	32.2857	87.8296	4.60946	630.417	1813.59	2.68634	674.744		0.707304	3.93486e-05	3.20324	-2.27282
WKJ	19	WKJb-2	Kungurian-Roadian	Wadi Khawr al Jaramah	Oman		273.015	0.364265	273.015	0.364265	Callytharrella websteri	Laminar	Good	yes	good	Heavy	13.0826		22.4162	758.519	13.8334	0.935476	3.27275	77.6148	5.21494	197.221		1.19584	855.987	Al/Ca and Mn/Ca, but does not translate to variable B/Ca and d11B	0.707312	1.6e-05
WKJ	20	WKJf-7	Kungurian-Roadian	Wadi Khawr al Jaramah	Oman		273.015	0.364265	273.015	0.364265	Aequalicosta sp.	NA	Heavily altered						10.2013	16.4668	0.589463	16.9116	83.9221	356.394	0.589463	1611.94	8360.05	6.96891	1556.34				4.07847	-2.59327
WKJ	21	WKJf-7	Kungurian-Roadian	Wadi Khawr al Jaramah	Oman		273.015	0.364265	273.015	0.364265	Aequalicosta sp.	NA	Heavily altered					12.049	209.418	547.078	27.5294	1.2888	2110.04	573.329	10.9601	17113.9		22.3253	19262.8	high Mn/Ca and Al/Ca
WKJ	22	WKJe-55	Kungurian-Roadian	Wadi Khawr al Jaramah	Oman		273.015	0.364265	273.015	0.364265	Squamularia marcouxi	Fibrous	Locally altered	yes	good	limited	13.3174		8.48784	40.4998	4.32245	0.439417	6.71811	64.9385	1.37094	136.778		0.623645	212.817		0.707277	1.5e-05
WKJ	23	WKJf-11	Kungurian-Roadian	Wadi Khawr al Jaramah	Oman		273.015	0.364265	273.015	0.364265	Martinia sp.	Fibrous	Good	yes	good	Heavy	12.1636		12.7658	27.0883	1.80303	2.3958	12.866	68.9549	1.80303	192.591	381.492	0.567425	254.678				5.07149	-1.54572
WKJ	24	WKJf-11	Kungurian-Roadian	Wadi Khawr al Jaramah	Oman		273.015	0.364265	273.015	0.364265	Martinia sp.	Fibrous	Good	yes	good	Heavy		10.6602	9.54271	9.52045	14.8694	0.490594	1.61714	631.945	0.270927	428.067		9.66404	480.221	U/Ca and Mn/Ca
WKJ	25	WKJf-35	Kungurian-Roadian	Wadi Khawr al Jaramah	Oman		273.015	0.364265	273.015	0.364265	Cartorhium aff. multiradiatus	Fibrous	Good	yes	good	Heavy	14.2025		6.58137	31.9033	2.89478	0.396512	0.281016	5.10656	1.05862	7.56109		0.0366105	6.01859		0.707268	1.5e-05
WKJ	26	WKJf-35	Kungurian-Roadian	Wadi Khawr al Jaramah	Oman		273.015	0.364265	273.015	0.364265	Cartorhium aff. multiradiatus	Fibrous	Good	yes	good	Heavy	13.8898		32.1274	152.244	5.55273	0.621476	0.974734	39.2509	4.22248	74.6284		0.114579	42.6194		0.707268	1.5e-05
JX	27	JX3-4	upper Kungurian-lower Roadian near the Cisuralian-Guadalupian boundary (Kungurian-Roadian), possibly going a bit into Roadian	Jebel X	Oman	274-272			273		Calliprotonia sp.	Laminar	Good	Very limited	good	Very limited		11.6879	113.814	1093.15	10.4911	1.03177	1.77689	180.662	11.4554	127.807	644.731	0.707986	239.981	small sample measured, dubious sampling, altered shell			1.99231	-3.95277
JX	28	JX3-4	upper Kungurian-lower Roadian near the Cisuralian-Guadalupian boundary (Kungurian-Roadian), possibly going a bit into Roadian	Jebel X	Oman	274-272			273		Calliprotonia sp.	Laminar	Good	Very limited	good	Very limited	12.4935		2.57442	1551.7	10.0724	1.20779	5.99203	11.1679	5.299	909.492	1246.23	1.24638	4.76424	consistent d11B despite high Mn/Ca and Fe/Ca
JX	29	JX3-4	upper Kungurian-lower Roadian near the Cisuralian-Guadalupian boundary (Kungurian-Roadian), possibly going a bit into Roadian	Jebel X	Oman	274-272			273		Calliprotonia sp.	Laminar	Good	Very limited	good	Very limited	12.758		1.91423	1452.46	9.30093	1.29501	6.43252	8.80489	5.04543	870.376	1527.43	1.03453	10.1673	consistent d11B despite high Mn/Ca and Fe/Ca
WKJ	30	WKJb-22	upper Kungurian-lower Roadian near the Cisuralian-Guadalupian boundary (Kungurian-Roadian), possibly going a bit into Roadian	Wadi Khawr al Jaramah	Oman	274-272			273		Transennatia insculpta	Laminar	Good, locally altered	yes	altered	heavy			18.4404	380.919	17.6726	0.701827	5.17983	547.678	3.19598	540.893	5747.82	2.83816	138.163
WKJ	31	WKJb-22	upper Kungurian-lower Roadian near the Cisuralian-Guadalupian boundary (Kungurian-Roadian), possibly going a bit into Roadian	Wadi Khawr al Jaramah	Oman	274-272			273		Transennatia insculpta	Laminar	Good, locally altered	yes	altered	heavy	12.6647		36.8962	981.754	12.2162	1.08017	7.56681	276.037	7.96718	433.926	2138.73	2.93079	203.861	consistent d11B despite high Mn/Ca and Fe/Ca
WKJ	32	WKJd-40	upper Kungurian-lower Roadian near the Cisuralian-Guadalupian boundary (Kungurian-Roadian), possibly going a bit into Roadian	Wadi Khawr al Jaramah	Oman	274-272			273		Cleiothyridina sp.	Fibrous	Good	yes	good	heavy	12.6309		67.807	627.655	9.89286	1.00345	4.81964	168.566	8.62813	192.152	1477.36	1.06287	111.058	consistent d11B despite high Mn/Ca and Fe/Ca			3.89259	-2.03116
WKJ	33	WKJd-56	upper Kungurian-lower Roadian near the Cisuralian-Guadalupian boundary (Kungurian-Roadian), possibly going a bit into Roadian	Wadi Khawr al Jaramah	Oman	274-272			273		Retimarginifera auricolata	Laminar	Good	?		heavy	12.3762		38.4203	1557.96	9.98899	1.17388	2.63148	76.4375	9.33536	204.149	700.008	1.24037	35.9621	OK
WKJ	34	WKJd-56	upper Kungurian-lower Roadian near the Cisuralian-Guadalupian boundary (Kungurian-Roadian), possibly going a bit into Roadian	Wadi Khawr al Jaramah	Oman	274-272			273		Retimarginifera auricolata	Laminar	Good	?		heavy			44.852	1315.8	10.9858	1.12237	2.18059	74.2061	9.81202	209.752	834.132	1.27108	235.393
WKJ	35	WKJd-6	upper Kungurian-lower Roadian near the Cisuralian-Guadalupian boundary (Kungurian-Roadian), possibly going a bit into Roadian	Wadi Khawr al Jaramah	Oman	274-272			273		Aequalicosta sp.	Fibrous	Heavily altered					11.5543	7.07816	16.5561	14.8256	0.412314	0.743927	428.277	0.49854	459.034	12869.1	3.08966	32.6216	U/Ca and Fe/Ca
WKJ	36	WKJd-6	upper Kungurian-lower Roadian near the Cisuralian-Guadalupian boundary (Kungurian-Roadian), possibly going a bit into Roadian	Wadi Khawr al Jaramah	Oman	274-272			273		Aequalicosta sp.	Fibrous	Heavily altered						31.8066	229.236	12.8278	0.657444	9.90566	383.441	4.21281	350.486	4926.12	4.31319	253.498				3.93923	-1.81619
WKJ	37	WKJd-6	upper Kungurian-lower Roadian near the Cisuralian-Guadalupian boundary (Kungurian-Roadian), possibly going a bit into Roadian	Wadi Khawr al Jaramah	Oman	274-272			273		Aequalicosta sp.	Fibrous	Heavily altered						30.2065	232.252	10.1758	0.634042	14.7916	306.496	3.90481	394.775	3819.37	3.7604	310.505
WKJ	38	WKJd-8	upper Kungurian-lower Roadian near the Cisuralian-Guadalupian boundary (Kungurian-Roadian), possibly going a bit into Roadian	Wadi Khawr al Jaramah	Oman	274-272			273		Caricula sp.	Laminar	good	yes	good	no	12.5154		47.112	2292.79	12.3812	1.30329	2.44102	24.0653	11.7538	237.155	639.135	0.985902	6.61128
WKJ	39	WKJd-8	upper Kungurian-lower Roadian near the Cisuralian-Guadalupian boundary (Kungurian-Roadian), possibly going a bit into Roadian	Wadi Khawr al Jaramah	Oman	274-272			273		Caricula sp.	Laminar	good	yes	good	no			44.0069	2005.99	13.0145	1.17808	2.24536	81.0787	10.2518	260.39	2720.39	1.15077	5.28625
WKJ	40	WKJf-3	upper Kungurian-lower Roadian near the Cisuralian-Guadalupian boundary (Kungurian-Roadian), possibly going a bit into Roadian	Wadi Khawr al Jaramah	Oman	274-272			273		Spiriferella posterosulcata	Fibrous	Good	yes	good,locally altered	heavy		9.86291	36.8485	721.144	6.19695	1.23415	1.26821	4.60828	8.57888	7.55132	62.8285	0.0306795	4.35494	Altered shell part used for boron?			4.22277	-2.18068
WKJ	41	WKJf-3	upper Kungurian-lower Roadian near the Cisuralian-Guadalupian boundary (Kungurian-Roadian), possibly going a bit into Roadian	Wadi Khawr al Jaramah	Oman	274-272			273		Spiriferella posterosulcata	Fibrous	Good	yes	good,locally altered	heavy		11.1351	11.428	64.5191	13.2692	0.45122	0.904367	693.176	1.11093	652.387	13972.3	9.23692	95.5907	Variable B/Ca, Mn/Ca and Fe/Ca			3.31123	-2.97217
WKJ	42	WKJf-36	upper Kungurian-lower Roadian near the Cisuralian-Guadalupian boundary (Kungurian-Roadian), possibly going a bit into Roadian	Wadi Khawr al Jaramah	Oman	274-272			273		Cartorhium aff. multiradiatus	Fibrous	Good, locally altered	yes	locally altered	limited	13.7309		9.82611	41.9532	3.26261	0.425752	0.850633	39.346	1.621	60.3056	343.59	0.347094	24.4004
WKJ	43	WKJf-36	upper Kungurian-lower Roadian near the Cisuralian-Guadalupian boundary (Kungurian-Roadian), possibly going a bit into Roadian	Wadi Khawr al Jaramah	Oman	274-272			273		Cartorhium aff. multiradiatus	Fibrous	Good, locally altered	yes	locally altered	limited	13.6038		52.9809	372.74	5.26485	0.773433	7.39106	108.855	6.62689	233.206	683.458	0.839774	96.0659	consistent d11B despite high Mn/Ca and Fe/Ca			4.1571	-1.53882
WKJ	44	WKJf-36	upper Kungurian-lower Roadian near the Cisuralian-Guadalupian boundary (Kungurian-Roadian), possibly going a bit into Roadian	Wadi Khawr al Jaramah	Oman	274-272			273		Cartorhium aff. multiradiatus	Fibrous	Good, locally altered	yes	locally altered	limited	13.983		7.17075	16.6864	2.67459	0.397413	0.203981	15.3655	1.27393	26.0418	102.974	0.0894893	2.27978
WKJ	45	WKJf-36	upper Kungurian-lower Roadian near the Cisuralian-Guadalupian boundary (Kungurian-Roadian), possibly going a bit into Roadian	Wadi Khawr al Jaramah	Oman	274-272			273		Cartorhium aff. multiradiatus	Fibrous	Good, locally altered	yes	locally altered	limited			34.4533	177.788	6.13851	0.600102	118.72	87.2781	4.13562	1196.88	501.315	1.44368	390.154				3.93812	-2.10742
WKJ	46	WKJe-29B	upper Kungurian-lower Roadian near the Cisuralian-Guadalupian boundary (Kungurian-Roadian), possibly going a bit into Roadian	Wadi Khawr al Jaramah	Oman	274-272			273		Stenoscisma qararensis	Fibrous	limited	yes	good	heavy	12.7622		10.1435	32.5857	1.74575	0.395392	0.330572	4.83817	1.49736	6.61273	42.3524	0.0541839	1.90329				4.07709	-2.87604
WKJ	47	WKJe-29B	upper Kungurian-lower Roadian near the Cisuralian-Guadalupian boundary (Kungurian-Roadian), possibly going a bit into Roadian	Wadi Khawr al Jaramah	Oman	274-272			273		Stenoscisma qararensis	Fibrous	limited	yes	good	heavy			14.1123	90.5691	4.15424	0.4812	2.10877	138.746	1.95431	209.622	1879.39	2.96839	29.7953
AU-15-WW(HB)-B-14	81	Au-27a	Roadian	Wandrawandian	Australia				272.718	1.20534	?Ingelarella	Columnar					11.22		2.66834	557.009	1.65681	0.794721	1.37573	0.00157791	3.0501	11.5	266.931	209.583	273.859
AU-15-WW(HB)-B-14	82	Au-27b	Roadian	Wandrawandian	Australia				272.718	1.20534	?Ingelarella	Columnar					10.99		2.28328	756.484	1.47998	0.836019	1.29013	0.00205953	3.33941	21.8894	219.928	65.7809	331.492
AU-15-WW(HB)-B-14	83	Au-27c	Roadian	Wandrawandian	Australia				272.718	1.20534	?Ingelarella	Columnar					11.35		0.926586	586.837	1.36726	0.734195	0.940201	0.000954223	3.02443	21.4235	80.3159	22.5717	96.3861		0.706914	5e-06
UNE-L933	92	Au-62a	Roadian	Nowra Sandstone	Australia				267.305	0.250924	Glendonia	Columnar					10.88		2.71607	637.846	1.27308	0.913196	1.19608	0.00139784	2.9812	29.733	88.3373	849.511	164.28
UNE-L933	93	Au-62b	Roadian	Nowra Sandstone	Australia				267.305	0.250924	Glendonia	Columnar					10.74		3.25132	787.635	1.38811	0.901094	1.83522	0.00182261	3.31186	38.4988	210.955	505.446	279.434		0.706951	5e-06
JB-12	94	Au-67a	Wordian	Berry Siltstone	Australia				266.511	0.1741	Trigonotreta	Columnar					12.24		8.36678	512.679	4.50267	0.971125	2.26608	0.011236	6.27896	94.5955	238.275	837.452	250.022
JB-12	95	Au-67b	Wordian	Berry Siltstone	Australia				266.511	0.1741	Trigonotreta	Columnar					9.57883		7.34642	631.764	2.95822	1.3204	3.16401	0.00196132	5.52994	5.63723	250.088	81.3077	813.668
JB-12	96	Au-67c	Wordian	Berry Siltstone	Australia				266.511	0.1741	Trigonotreta	Columnar					10.97		7.00123	425.536	2.73996	1.09409	1.88702	0.00148229	3.87049	20.0926	298.613	38.6896	217.845
AU-15-WW-PH-B-20	84	Au-41b	Wordian	Wandrawandian	Australia				266.473	0.574684	Large fragment-Unknown	Columnar					10.3		0.640745	820.611	1.89675	0.93794	1.59523	0.00205914	3.91322	11.8706	13.5914	10.0008	48.9764
AU-15-BR(BH)-B-2	77	Au-21a	Wordian	Broughton Formation	Australia				265.594	0.128478	Ingelarella	Columnar					10.46		1.47468	614.394	2.87628	0.870543	1.34578	0.0153398	4.12398	68.1788	230.627	1211.19	221.93
AU-15-BR(BH)-B-2	78	Au-21b	Wordian	Broughton Formation	Australia				265.594	0.128478	Ingelarella	Columnar						9.70712	4.37548	780.522	3.36056	1.02537	1.6057	0.00563081	3.57191	26.6013	1041.05	205.776	2349.98	high Fe/Ca and Al/Ca
AU-15-BR(BH)-B-2	79	Au-21c	Wordian	Broughton Formation	Australia				265.594	0.128478	Ingelarella	Columnar					10.34		1.52144	939.236	2.24487	1.058	1.09115	0.00180847	4.36791	12.2085	37.8862	9.41837	64.0406
AU-15-BR(BH)-B-4	73	Au-16a	Wordian	Broughton Formation	Australia				265.193	0.100225	Ingelarella	Fibrous						11.2861	5.0881	502.751	3.57	1.08718	1.93604	0.0051715	4.67217	173.294	1424.37	139.391	990.38	high Fe/Ca and Al/Ca
AU-15-BR(BH)-B-4	74	Au-16b	Wordian	Broughton Formation	Australia				265.193	0.100225	Ingelarella	Columnar					10.12		3.52494	764.201	1.82336	1.25273	2.20127	0.00239168	5.16096	37.8715	233.51	20.0872	183.164		0.706858	5e-06
AU-15-BR(BH)-B-4	75	Au-16c	Wordian	Broughton Formation	Australia				265.193	0.100225	Ingelarella	Columnar					10.41		4.51124	796.383	1.94563	1.29874	2.39946	0.00251835	4.74534	32.6176	256.562	27.1267	484.651
