# Supplementary material for: Rapid rise in atmospheric CO2 marked the end of the Late Palaeozoic Ice Age
Source: Nat Geosci. 2025 Jan 6;18(1):91–7. doi: 10.1038/s41561-024-01610-2 (PMC11732749; doi:10.1038/s41561-024-01610-2)
Supplement: Supplementary file 3 — Interpolated records (including pH and CO2) paired to δ11B samples, main scenario. [file 41561_2024_1610_MOESM3_ESM.xlsx]

## Sheet: description
Supplementary Data to Jurikova et al. 'Rapid rise in atmospheric CO2 marked the end of the Late Palaeozoic Ice Age'
Data S2	Interpolated records (including pH, CO2) paired to d11B samples, main scenario (assuming constant d18Osw)
	All interpolations provided with mean values and 5, 16, 50, 84, and 95 % confidence intervals
tab	description
d11B4	d11B borate (‰), calibrated using new brachiopod calibration, see Supplementary Information
d11Bm	d11B measured = d11B brachiopod (‰)
d11Bsw	d11B seawater (‰) reconstructed
pH	pH
CO2	CO2 (ppm)
dic	dissolved inorganic carbon (μmol/kg)
alkalinity	alkalinity (μmol/kg)
saturation_state	calcite saturation state
strontium	87Sr/86Sr
d18O	d18O (‰)
d13C	d13C (‰)

## Sheet: d11B4
	age	mean	5	16	50	84	95
103	265.193	8.65283	8.24384	8.3809	8.62939	8.92311	9.10351
102	265.594	8.71661	8.32222	8.45559	8.69578	8.97607	9.15439
101	266.473	8.8225	8.42142	8.55094	8.81013	9.08082	9.24889
100	266.511	8.82685	8.42465	8.55475	8.81344	9.08344	9.25267
99	267.305	8.89156	8.44743	8.5958	8.88319	9.17852	9.34675
98	269	8.96926	8.43513	8.61503	8.95743	9.30719	9.5331
97	269	8.96935	8.43484	8.61683	8.95679	9.30914	9.53566
96	270.2	9.0099	8.42791	8.63144	8.9903	9.38415	9.62143
95	270.2	9.01034	8.4265	8.63333	8.98852	9.38601	9.62489
94	271.49	9.06088	8.43184	8.65208	9.04968	9.45749	9.69412
93	273	9.12965	8.42568	8.68642	9.14395	9.53499	9.77143
92	273	9.12751	8.42229	8.68456	9.14286	9.53118	9.76861
91	273.015	9.12816	8.42619	8.68583	9.14386	9.5324	9.77184
90	275.81	9.06331	8.41126	8.64154	9.06685	9.43597	9.75787
84	275.96	9.04129	8.4	8.62245	9.0414	9.40872	9.73613
85	275.96	9.04167	8.39825	8.62299	9.04343	9.41238	9.7352
87	275.96	9.04216	8.40308	8.62436	9.04337	9.40896	9.74068
89	275.96	9.04208	8.40209	8.62571	9.04186	9.41337	9.73548
86	275.96	9.04242	8.40104	8.62453	9.04135	9.41399	9.73704
88	275.96	9.04164	8.40308	8.62326	9.04271	9.40855	9.7337
83	279.427	8.0061	7.56171	7.71987	7.99447	8.27836	8.47057
82	280.325	7.61978	7.18959	7.33759	7.62316	7.8724	8.04253
81	282.899	6.6157	6.20205	6.32992	6.60325	6.87253	7.07171
80	289.754	6.66912	6.39491	6.48067	6.65519	6.84957	6.97722
79	291.254	7.66288	7.30969	7.44071	7.65084	7.8805	8.02632
78	292.276	8.65133	8.21454	8.38785	8.64534	8.91392	9.0663
74	292.31	8.68671	8.24364	8.42099	8.67867	8.95472	9.10085
76	292.31	8.68749	8.24667	8.42158	8.67897	8.95571	9.1026
77	292.31	8.68734	8.24474	8.42227	8.67899	8.95437	9.1009
75	292.31	8.68649	8.24399	8.41967	8.67881	8.95393	9.10341
73	292.376	8.76044	8.3166	8.49192	8.75503	9.02727	9.17972
72	292.376	8.76037	8.31828	8.49225	8.7543	9.02867	9.17969
71	292.56	8.96771	8.51235	8.69258	8.96181	9.24389	9.39452
70	292.924	9.40245	8.92094	9.11243	9.40202	9.6859	9.85313
69	293	9.49729	9.01298	9.20526	9.49527	9.78378	9.9519
68	293.52	10.1668	9.65313	9.85788	10.1673	10.4639	10.6371
67	294.15	11.0243	10.5073	10.7149	11.0268	11.3268	11.4978
66	294.63	11.6922	11.1707	11.3889	11.6935	11.9911	12.1684
65	294.87	12.0253	11.5126	11.7238	12.0259	12.3252	12.4968
64	296.185	13.6896	13.203	13.3911	13.6803	13.9815	14.1731
63	296.21	13.7203	13.2256	13.4158	13.7117	14.0124	14.1982
62	296.53	14.0567	13.551	13.7447	14.0497	14.3573	14.544
61	296.65	14.1765	13.6683	13.8588	14.1721	14.4758	14.6661
60	296.65	14.1749	13.6652	13.8589	14.1712	14.4724	14.6686
59	299.09	15.4349	14.826	15.0716	15.4485	15.7768	15.9845
58	299.25	15.4469	14.8383	15.0843	15.4634	15.7837	15.9954
57	299.25	15.4463	14.8374	15.0859	15.4634	15.7841	15.9901
56	299.25	15.4447	14.8297	15.0835	15.4605	15.7818	15.9926
55	299.25	15.4466	14.8361	15.0842	15.4632	15.7837	15.9909
54	299.32	15.4495	14.8453	15.0913	15.4682	15.7859	15.994
53	299.32	15.4508	14.8374	15.0893	15.4677	15.7886	15.9977
52	299.32	15.4503	14.8375	15.0933	15.468	15.7855	15.9968
51	299.35	15.4499	14.841	15.0892	15.4687	15.7848	15.9955
49	299.35	15.4517	14.8443	15.0968	15.4684	15.7866	15.9949
50	299.35	15.4498	14.8351	15.0874	15.4677	15.7884	15.9979
48	299.4	15.4502	14.8367	15.0886	15.4676	15.7878	15.9997
47	300	15.4207	14.8133	15.0542	15.4411	15.762	15.9777
46	300	15.4208	14.8099	15.0542	15.4419	15.7618	15.9753
45	300	15.4198	14.8084	15.0511	15.4405	15.7615	15.9746
44	300	15.4167	14.8087	15.0515	15.438	15.7545	15.9693
43	300	15.4185	14.8087	15.0515	15.4385	15.7582	15.9737
42	300.5	15.3398	14.7285	14.9694	15.3561	15.6825	15.8972
41	300.5	15.3393	14.7301	14.969	15.3556	15.6825	15.8946
40	300.5	15.3398	14.7304	14.9706	15.356	15.6823	15.8937
39	300.5	15.3431	14.7356	14.9722	15.3581	15.685	15.8986
38	302.33	14.8924	14.2779	14.5422	14.8765	15.237	15.5083
36	303.12	14.7037	14.1078	14.3475	14.6864	15.0468	15.3247
37	303.12	14.7027	14.1045	14.3448	14.6846	15.0466	15.3322
35	303.47	14.6309	14.0395	14.2704	14.6154	14.9679	15.2584
34	303.7	14.5875	14.0006	14.2274	14.5721	14.9229	15.2163
33	303.7	14.588	14.0028	14.2257	14.5739	14.9261	15.2181
32	303.7	14.5902	14.0045	14.2292	14.5765	14.9273	15.2211
31	303.87	14.5568	13.971	14.1918	14.5425	14.8926	15.1855
30	304.17	14.5101	13.9243	14.143	14.4954	14.8517	15.1417
29	304.17	14.5108	13.9249	14.1415	14.4954	14.853	15.1404
28	304.39	14.4784	13.8972	14.1067	14.4621	14.8209	15.1
27	304.46	14.4686	13.8833	14.0981	14.4518	14.8085	15.0913
26	304.46	14.4726	13.8922	14.0998	14.4551	14.8148	15.0938
25	304.64	14.4454	13.8627	14.0758	14.4273	14.7889	15.0713
24	305.17	14.3951	13.8099	14.0239	14.3735	14.7494	15.0241
23	305.35	14.3814	13.7964	14.0103	14.3579	14.738	15.0069
22	305.5	14.3704	13.7778	14.0008	14.349	14.7304	14.9967
21	305.5	14.3724	13.7816	14.0036	14.3499	14.7308	15.0011
20	307	14.3438	13.7414	13.9667	14.324	14.7075	15.0006
19	307.38	14.3525	13.7479	13.9776	14.3349	14.7126	15.0062
18	307.38	14.3551	13.7496	13.9796	14.3382	14.7155	15.0078
17	307.4	14.3532	13.747	13.9772	14.3362	14.714	15.0052
16	307.7	14.3643	13.7582	13.9955	14.3493	14.7264	15.011
15	308.3	14.3959	13.8031	14.0343	14.3807	14.7528	15.027
14	308.8	14.4328	13.8367	14.0815	14.4139	14.7857	15.0585
13	310	14.535	13.9869	14.2023	14.5114	14.8799	15.1139
12	311.028	14.6318	14.1213	14.2956	14.6045	14.9712	15.1921
11	311.1	14.6369	14.1272	14.3006	14.6091	14.9757	15.1943
10	311.1	14.6365	14.1268	14.301	14.6079	14.9779	15.1944
9	312.8	14.781	14.2138	14.3973	14.7549	15.1718	15.4269
8	314	14.8395	14.1607	14.3881	14.8318	15.2741	15.5757
7	320.2	14.1337	13.2479	13.5873	14.1105	14.6876	15.0647
6	320.2	14.1345	13.2486	13.5872	14.1122	14.6875	15.0687
5	331.362	14.9166	14.2862	14.5299	14.9198	15.2942	15.5746
4	331.395	14.9303	14.3068	14.5488	14.9317	15.3019	15.588
3	331.919	15.1761	14.6021	14.8266	15.173	15.5119	15.8087
2	331.993	15.2134	14.639	14.8664	15.2095	15.5499	15.8387
1	332.454	15.4549	14.8701	15.1186	15.4389	15.8101	16.0817
0	333.317	15.9612	15.3028	15.5562	15.935	16.374	16.7118

## Sheet: d11Bm
	age	mean	5	16	50	84	95
103	265.193	11.7866	11.4631	11.573	11.7684	11.9931	12.138
102	265.594	11.8359	11.5254	11.6313	11.8174	12.04	12.1728
101	266.473	11.9178	11.6093	11.709	11.9072	12.1168	12.2518
100	266.511	11.9212	11.6108	11.7123	11.9092	12.1224	12.2546
99	267.305	11.9712	11.6232	11.7358	11.9631	12.1909	12.3249
98	269	12.0313	11.618	11.7535	12.0225	12.2929	12.4694
97	269	12.0313	11.6168	11.7531	12.0224	12.2921	12.4698
96	270.2	12.0628	11.6105	11.7673	12.0466	12.355	12.5373
95	270.2	12.0631	11.6109	11.7693	12.0453	12.3563	12.5388
94	271.49	12.1022	11.6154	11.7842	12.0947	12.4057	12.5928
93	273	12.1554	11.6108	11.812	12.1656	12.4691	12.6534
92	273	12.1538	11.6096	11.8103	12.1651	12.4657	12.6506
91	273.015	12.1542	11.6108	11.8113	12.1648	12.467	12.6531
90	275.81	12.1041	11.6004	11.7756	12.1058	12.3885	12.6377
84	275.96	12.087	11.587	11.7591	12.0848	12.3747	12.6251
85	275.96	12.0873	11.5848	11.7596	12.0859	12.3747	12.6234
87	275.96	12.0877	11.5882	11.7602	12.085	12.3751	12.6261
89	275.96	12.0876	11.5863	11.7609	12.0843	12.3763	12.6233
86	275.96	12.0879	11.5868	11.761	12.0848	12.3757	12.6267
88	275.96	12.0873	11.5895	11.7604	12.0852	12.376	12.6225
83	279.427	11.2863	10.9397	11.0587	11.2743	11.4957	11.6487
82	280.325	10.9875	10.6498	10.765	10.9901	11.1822	11.311
81	282.899	10.2109	9.88638	9.99101	10.2	10.407	10.567
80	289.754	10.2522	10.0244	10.1075	10.2394	10.3896	10.4893
79	291.254	11.0208	10.7391	10.8437	11.0091	11.1883	11.2976
78	292.276	11.7854	11.4408	11.5771	11.7777	11.9865	12.1065
74	292.31	11.8128	11.467	11.6071	11.8058	12.0184	12.1406
76	292.31	11.8134	11.4687	11.608	11.8051	12.0201	12.1425
77	292.31	11.8132	11.4693	11.6073	11.8062	12.0187	12.1416
75	292.31	11.8126	11.4666	11.6064	11.8061	12.0182	12.1426
73	292.376	11.8697	11.5202	11.6554	11.8636	12.077	12.1928
72	292.376	11.8697	11.5216	11.6557	11.8632	12.0765	12.1932
71	292.56	12.0301	11.6735	11.8147	12.0254	12.2453	12.3661
70	292.924	12.3664	11.9966	12.1367	12.3613	12.5849	12.7105
69	293	12.4397	12.0582	12.2113	12.437	12.6641	12.7882
68	293.52	12.9576	12.5551	12.7189	12.9576	13.1853	13.3197
67	294.15	13.6209	13.2154	13.376	13.6217	13.857	13.9886
66	294.63	14.1375	13.7295	13.9023	14.1381	14.3696	14.5024
65	294.87	14.3952	14.0007	14.1567	14.3951	14.6273	14.7664
64	296.185	15.6825	15.3029	15.4455	15.6749	15.9061	16.0578
63	296.21	15.7063	15.3182	15.4701	15.6966	15.9351	16.0826
62	296.53	15.9665	15.5732	15.7245	15.9599	16.1939	16.3469
61	296.65	16.0591	15.6609	15.8136	16.0558	16.2888	16.4414
60	296.65	16.0579	15.6584	15.8129	16.0545	16.2866	16.4405
59	299.09	17.0325	16.5593	16.7475	17.0415	17.2926	17.4635
58	299.25	17.0417	16.5695	16.757	17.0529	17.299	17.4729
57	299.25	17.0413	16.569	16.7578	17.0535	17.2994	17.4677
56	299.25	17.0401	16.5626	16.7556	17.0518	17.299	17.4695
55	299.25	17.0416	16.5686	16.7582	17.0529	17.2991	17.4687
54	299.32	17.0439	16.5711	16.7599	17.0566	17.3006	17.4726
53	299.32	17.0447	16.5684	16.7597	17.0563	17.3029	17.4736
52	299.32	17.0445	16.5664	16.7605	17.0571	17.2998	17.4738
51	299.35	17.0441	16.5686	16.7594	17.0573	17.3006	17.4729
49	299.35	17.0455	16.5697	16.7635	17.0574	17.3008	17.4737
50	299.35	17.044	16.5648	16.7588	17.0562	17.306	17.4742
48	299.4	17.0444	16.5657	16.758	17.0565	17.304	17.4748
47	300	17.0215	16.5449	16.734	17.0361	17.2842	17.4565
46	300	17.0216	16.5417	16.7336	17.0361	17.2845	17.4542
45	300	17.0208	16.5428	16.7328	17.0359	17.2845	17.4517
44	300	17.0183	16.5416	16.7324	17.0342	17.2807	17.4509
43	300	17.0198	16.5413	16.7327	17.034	17.2824	17.4522
42	300.5	16.9591	16.4877	16.6686	16.9697	17.2225	17.389
41	300.5	16.9585	16.4903	16.6675	16.9697	17.2215	17.3891
40	300.5	16.9589	16.4867	16.669	16.9703	17.2224	17.3893
39	300.5	16.9615	16.494	16.6701	16.9722	17.2262	17.393
38	302.33	16.6129	16.1364	16.3393	16.5992	16.8811	17.0864
36	303.12	16.4668	16.0038	16.1904	16.4539	16.7321	16.95
37	303.12	16.4662	16.0025	16.1874	16.4525	16.7319	16.9535
35	303.47	16.4106	15.9513	16.13	16.3984	16.6725	16.8919
34	303.7	16.377	15.9208	16.0996	16.3631	16.6404	16.8635
33	303.7	16.3774	15.9221	16.0974	16.3642	16.6408	16.8639
32	303.7	16.3791	15.9221	16.1007	16.3662	16.6422	16.8646
31	303.87	16.3533	15.9033	16.0661	16.3408	16.614	16.8421
30	304.17	16.3172	15.859	16.0318	16.3051	16.5808	16.8
29	304.17	16.3177	15.8592	16.0317	16.3047	16.5818	16.8009
28	304.39	16.2927	15.8363	16.0043	16.2789	16.5581	16.777
27	304.46	16.2851	15.8291	15.9976	16.2714	16.5509	16.7695
26	304.46	16.2881	15.8333	15.999	16.2736	16.5544	16.7721
25	304.64	16.2672	15.816	15.9795	16.2515	16.5328	16.7525
24	305.17	16.2282	15.7673	15.9379	16.2103	16.5012	16.7123
23	305.35	16.2176	15.7571	15.9279	16.1981	16.4906	16.7014
22	305.5	16.2092	15.7446	15.9197	16.1913	16.4834	16.6944
21	305.5	16.2107	15.7489	15.9213	16.1913	16.4867	16.6966
20	307	16.1886	15.7205	15.8993	16.1722	16.4708	16.695
19	307.38	16.1953	15.7257	15.9055	16.1804	16.4752	16.6968
18	307.38	16.1973	15.7253	15.9061	16.1834	16.4777	16.6994
17	307.4	16.1958	15.7255	15.9046	16.1809	16.4765	16.7005
16	307.7	16.2044	15.7302	15.9145	16.1919	16.4839	16.7037
15	308.3	16.2288	15.7584	15.9455	16.2147	16.5014	16.7163
14	308.8	16.2574	15.8014	15.9834	16.2405	16.5324	16.7404
13	310	16.3364	15.9118	16.072	16.3174	16.6004	16.7875
12	311.028	16.4113	16.0142	16.145	16.3889	16.675	16.8453
11	311.1	16.4152	16.0195	16.1496	16.3932	16.6781	16.849
10	311.1	16.4149	16.0183	16.1491	16.3912	16.6781	16.8506
9	312.8	16.5267	16.0822	16.2264	16.506	16.8268	17.0272
8	314	16.572	16.0402	16.2195	16.5654	16.9067	17.142
7	320.2	16.026	15.3372	15.602	16.0073	16.4575	16.7491
6	320.2	16.0266	15.3372	15.6024	16.0083	16.4574	16.7522
5	331.362	16.6316	16.1376	16.331	16.6326	16.9258	17.1426
4	331.395	16.6422	16.1552	16.3457	16.6418	16.9335	17.1519
3	331.919	16.8323	16.3908	16.5595	16.8292	17.0911	17.3252
2	331.993	16.8611	16.4173	16.5952	16.8559	17.1225	17.3477
1	332.454	17.048	16.5996	16.786	17.0345	17.3236	17.5347
0	333.317	17.4396	16.9229	17.1238	17.4181	17.7587	18.0203

## Sheet: d11Bsw
	age	mean	5	16	50	84	95
103	265.193	27.3064	25.8714	26.41	27.229	28.3032	28.8333
102	265.594	27.4725	26.057	26.5873	27.4006	28.453	28.977
101	266.473	27.7732	26.3879	26.9103	27.7045	28.7235	29.238
100	266.511	27.7842	26.3986	26.9236	27.7148	28.7314	29.2469
99	267.305	27.9822	26.6128	27.1399	27.9154	28.9159	29.4231
98	269	28.2132	26.8637	27.3905	28.1515	29.1209	29.6239
97	269	28.2132	26.8637	27.3905	28.1515	29.1209	29.6239
96	270.2	28.2569	26.9175	27.4353	28.1977	29.1596	29.6621
95	270.2	28.2569	26.9175	27.4353	28.1977	29.1596	29.6621
94	271.49	28.2384	26.8932	27.4157	28.1775	29.1421	29.6481
93	273	28.1882	26.8389	27.361	28.1249	29.1004	29.6018
92	273	28.1882	26.8389	27.361	28.1249	29.1004	29.6018
91	273.015	28.1877	26.8386	27.3604	28.1242	29.0996	29.6018
90	275.81	28.1962	26.845	27.3723	28.1326	29.1085	29.6088
84	275.96	28.2037	26.8531	27.3791	28.1412	29.1134	29.6149
85	275.96	28.2037	26.8531	27.3791	28.1412	29.1134	29.6149
87	275.96	28.2037	26.8531	27.3791	28.1412	29.1134	29.6149
89	275.96	28.2037	26.8531	27.3791	28.1412	29.1134	29.6149
86	275.96	28.2037	26.8531	27.3791	28.1412	29.1134	29.6149
88	275.96	28.2037	26.8531	27.3791	28.1412	29.1134	29.6149
83	279.427	28.5839	27.2701	27.7899	28.5294	29.4555	29.9512
82	280.325	28.728	27.4344	27.9416	28.6763	29.5833	30.0765
81	282.899	29.1584	27.9022	28.4063	29.1143	29.9733	30.4572
80	289.754	30.4346	29.2563	29.7606	30.413	31.1386	31.5925
79	291.254	30.9202	29.7667	30.2679	30.9111	31.593	32.0315
78	292.276	31.319	30.1874	30.6819	31.3241	31.9715	32.3906
74	292.31	31.3329	30.1966	30.6982	31.3363	31.9833	32.4015
76	292.31	31.3329	30.1966	30.6982	31.3363	31.9833	32.4015
77	292.31	31.3329	30.1966	30.6982	31.3363	31.9833	32.4015
75	292.31	31.3329	30.1966	30.6982	31.3363	31.9833	32.4015
73	292.376	31.3607	30.2277	30.7256	31.3644	32.0085	32.4347
72	292.376	31.3607	30.2277	30.7256	31.3644	32.0085	32.4347
71	292.56	31.4386	30.3077	30.8058	31.4448	32.0853	32.4995
70	292.924	31.5972	30.4694	30.9664	31.6101	32.2372	32.6512
69	293	31.6311	30.5091	31.0027	31.6433	32.2706	32.6787
68	293.52	31.8681	30.7526	31.2432	31.8873	32.4969	32.9006
67	294.15	32.1662	31.0601	31.5427	32.1882	32.788	33.1739
66	294.63	32.3991	31.3012	31.7774	32.4224	33.015	33.3929
65	294.87	32.5167	31.4184	31.896	32.5402	33.1319	33.4987
64	296.185	33.1603	32.0735	32.5273	33.1906	33.772	34.1063
63	296.21	33.1722	32.0852	32.5409	33.2027	33.7832	34.119
62	296.53	33.325	32.2329	32.6913	33.3547	33.9395	34.2679
61	296.65	33.3817	32.2956	32.7437	33.4109	33.9935	34.3193
60	296.65	33.3817	32.2956	32.7437	33.4109	33.9935	34.3193
59	299.09	34.3988	33.2891	33.7368	34.4296	35.0517	35.323
58	299.25	34.4538	33.3445	33.7919	34.4851	35.1091	35.376
57	299.25	34.4538	33.3445	33.7919	34.4851	35.1091	35.376
56	299.25	34.4538	33.3445	33.7919	34.4851	35.1091	35.376
55	299.25	34.4538	33.3445	33.7919	34.4851	35.1091	35.376
54	299.32	34.4773	33.3667	33.8124	34.5085	35.1335	35.4016
53	299.32	34.4773	33.3667	33.8124	34.5085	35.1335	35.4016
52	299.32	34.4773	33.3667	33.8124	34.5085	35.1335	35.4016
51	299.35	34.4872	33.3722	33.822	34.5193	35.1441	35.411
49	299.35	34.4872	33.3722	33.822	34.5193	35.1441	35.411
50	299.35	34.4872	33.3722	33.822	34.5193	35.1441	35.411
48	299.4	34.5038	33.3871	33.8378	34.5338	35.1628	35.428
47	300	34.688	33.5665	34.0192	34.7187	35.3554	35.6158
46	300	34.688	33.5665	34.0192	34.7187	35.3554	35.6158
45	300	34.688	33.5665	34.0192	34.7187	35.3554	35.6158
44	300	34.688	33.5665	34.0192	34.7187	35.3554	35.6158
43	300	34.688	33.5665	34.0192	34.7187	35.3554	35.6158
42	300.5	34.8223	33.7006	34.1468	34.8562	35.4962	35.7547
41	300.5	34.8223	33.7006	34.1468	34.8562	35.4962	35.7547
40	300.5	34.8223	33.7006	34.1468	34.8562	35.4962	35.7547
39	300.5	34.8223	33.7006	34.1468	34.8562	35.4962	35.7547
38	302.33	35.1661	34.0329	34.4803	35.2027	35.8533	36.111
36	303.12	35.2502	34.111	34.5606	35.284	35.9426	36.198
37	303.12	35.2502	34.111	34.5606	35.284	35.9426	36.198
35	303.47	35.2773	34.1413	34.5884	35.3128	35.9705	36.2249
34	303.7	35.2921	34.1516	34.6061	35.3277	35.9862	36.2418
33	303.7	35.2921	34.1516	34.6061	35.3277	35.9862	36.2418
32	303.7	35.2921	34.1516	34.6061	35.3277	35.9862	36.2418
31	303.87	35.3017	34.1599	34.6137	35.3375	35.9989	36.2532
30	304.17	35.3159	34.1735	34.6264	35.3513	36.012	36.2694
29	304.17	35.3159	34.1735	34.6264	35.3513	36.012	36.2694
28	304.39	35.3245	34.1796	34.6338	35.3602	36.0211	36.2788
27	304.46	35.327	34.1814	34.637	35.3624	36.024	36.2813
26	304.46	35.327	34.1814	34.637	35.3624	36.024	36.2813
25	304.64	35.3326	34.1849	34.6418	35.3674	36.0292	36.2878
24	305.17	35.3449	34.2036	34.6533	35.3786	36.0409	36.2989
23	305.35	35.3478	34.2048	34.6561	35.3818	36.0443	36.3003
22	305.5	35.3499	34.2066	34.6578	35.3839	36.0464	36.3013
21	305.5	35.3499	34.2066	34.6578	35.3839	36.0464	36.3013
20	307	35.3656	34.2238	34.6715	35.4023	36.0643	36.3186
19	307.38	35.3712	34.2294	34.677	35.4073	36.0701	36.3251
18	307.38	35.3712	34.2294	34.677	35.4073	36.0701	36.3251
17	307.4	35.3715	34.2296	34.6773	35.4076	36.0706	36.3253
16	307.7	35.3772	34.2352	34.6845	35.4125	36.0768	36.3321
15	308.3	35.3929	34.2487	34.7039	35.4288	36.0928	36.3497
14	308.8	35.411	34.2644	34.7176	35.4476	36.1112	36.3707
13	310	35.4742	34.3295	34.7769	35.5112	36.1789	36.4359
12	311.028	35.5481	34.3928	34.847	35.5825	36.2551	36.5132
11	311.1	35.5537	34.398	34.853	35.5881	36.26	36.5205
10	311.1	35.5537	34.398	34.853	35.5881	36.26	36.5205
9	312.8	35.6911	34.5302	34.9863	35.7271	36.4057	36.6673
8	314	35.7694	34.6065	35.0622	35.8064	36.4886	36.7515
7	320.2	35.0788	33.949	34.3975	35.1137	35.7615	36.0197
6	320.2	35.0788	33.949	34.3975	35.1137	35.7615	36.0197
5	331.362	32.8462	31.7531	32.2197	32.8723	33.4567	33.8059
4	331.395	32.8562	31.7662	32.2293	32.8827	33.4648	33.818
3	331.919	33.0371	31.9452	32.4085	33.0657	33.6476	33.989
2	331.993	33.0657	31.9759	32.435	33.0951	33.677	34.0187
1	332.454	33.2605	32.1741	32.6271	33.2924	33.8728	34.2031
0	333.317	33.7018	32.6085	33.0581	33.7325	34.3262	34.6315

## Sheet: pH
	age	mean	5	16	50	84	95
103	265.193	8.21342	8.08602	8.13854	8.21649	8.28143	8.32959
102	265.594	8.20552	8.07786	8.12945	8.20886	8.274	8.32159
101	266.473	8.19026	8.06274	8.11328	8.1943	8.2597	8.30464
100	266.511	8.18974	8.0623	8.11283	8.1938	8.25946	8.30455
99	267.305	8.17909	8.05106	8.10115	8.18341	8.25049	8.29338
98	269	8.16655	8.0404	8.08529	8.17081	8.2412	8.28351
97	269	8.16655	8.04037	8.08534	8.17054	8.24154	8.28377
96	270.2	8.16622	8.04053	8.08479	8.16936	8.24109	8.28523
95	270.2	8.16625	8.04073	8.08495	8.16934	8.2412	8.28546
94	271.49	8.17188	8.04897	8.09405	8.17364	8.24615	8.28891
93	273	8.18166	8.06316	8.10854	8.18232	8.25325	8.29318
92	273	8.1815	8.06299	8.10874	8.18206	8.25271	8.29217
91	273.015	8.18158	8.06356	8.10877	8.18208	8.25293	8.29205
90	275.81	8.17614	8.06616	8.10946	8.17783	8.24075	8.27901
84	275.96	8.17375	8.06377	8.10706	8.1757	8.23833	8.27697
85	275.96	8.17378	8.06355	8.1068	8.17567	8.23809	8.27693
87	275.96	8.17382	8.06363	8.10714	8.17584	8.23834	8.27703
89	275.96	8.17382	8.06349	8.10703	8.17582	8.23836	8.27678
86	275.96	8.17383	8.0633	8.10671	8.1758	8.23826	8.27735
88	275.96	8.17378	8.06344	8.107	8.17581	8.23816	8.27691
83	279.427	8.0509	7.92056	7.97483	8.05548	8.1244	8.16442
82	280.325	7.99943	7.85878	7.91761	8.00451	8.07853	8.12297
81	282.899	7.83784	7.66933	7.73695	7.84253	7.93465	7.99853
80	289.754	7.6632	7.47455	7.55409	7.67011	7.76938	7.82787
79	291.254	7.74666	7.57844	7.64685	7.75228	7.84443	7.89392
78	292.276	7.82992	7.68015	7.73964	7.83463	7.91845	7.96338
74	292.31	7.83273	7.68269	7.7428	7.83765	7.92026	7.96548
76	292.31	7.83284	7.68282	7.74309	7.83767	7.92021	7.96596
77	292.31	7.83282	7.68314	7.74295	7.83775	7.92014	7.96552
75	292.31	7.83269	7.6828	7.74266	7.83742	7.92046	7.96585
73	292.376	7.83873	7.69054	7.74959	7.84349	7.92615	7.96995
72	292.376	7.83873	7.69063	7.74968	7.84329	7.92616	7.96984
71	292.56	7.85532	7.71031	7.76814	7.85981	7.94016	7.9844
70	292.924	7.88927	7.75127	7.80625	7.89341	7.97032	8.01257
69	293	7.89653	7.76101	7.81445	7.90058	7.97655	8.01842
68	293.52	7.94585	7.82135	7.87014	7.94901	8.01917	8.0595
67	294.15	8.00475	7.89353	7.93665	8.0069	8.07024	8.1088
66	294.63	8.04745	7.94599	7.98541	8.04898	8.10773	8.14378
65	294.87	8.06773	7.97163	8.00857	8.0683	8.12564	8.16118
64	296.185	8.15759	8.08398	8.11149	8.15597	8.20332	8.2353
63	296.21	8.15916	8.08598	8.11322	8.15755	8.20455	8.23662
62	296.53	8.17438	8.10452	8.13058	8.17237	8.21815	8.24889
61	296.65	8.17956	8.11128	8.13647	8.17742	8.22284	8.25356
60	296.65	8.17943	8.11124	8.13641	8.17709	8.22266	8.25341
59	299.09	8.19978	8.13643	8.15982	8.19633	8.2421	8.2674
58	299.25	8.19642	8.13306	8.15601	8.19293	8.2388	8.26445
57	299.25	8.19637	8.13327	8.1561	8.19289	8.23862	8.26457
56	299.25	8.19625	8.13303	8.15589	8.19282	8.23865	8.26459
55	299.25	8.19639	8.13307	8.15599	8.19298	8.23881	8.26455
54	299.32	8.19479	8.13153	8.15417	8.19131	8.23754	8.26301
53	299.32	8.19487	8.13169	8.15431	8.19146	8.23773	8.26312
52	299.32	8.19484	8.13141	8.15416	8.19132	8.23787	8.26324
51	299.35	8.19402	8.13064	8.15337	8.1906	8.23692	8.26268
49	299.35	8.19417	8.13095	8.15361	8.19069	8.23696	8.26272
50	299.35	8.194	8.13061	8.15321	8.19063	8.23698	8.26254
48	299.4	8.19274	8.12891	8.15209	8.18936	8.23581	8.26123
47	300	8.17571	8.11008	8.13384	8.17248	8.21961	8.24715
46	300	8.17572	8.11022	8.13388	8.1725	8.21949	8.24683
45	300	8.17564	8.10973	8.13365	8.17251	8.21945	8.2467
44	300	8.17539	8.10982	8.13335	8.17212	8.21937	8.24682
43	300	8.17554	8.11011	8.1337	8.17226	8.21933	8.24699
42	300.5	8.15823	8.09051	8.11498	8.1549	8.20341	8.23194
41	300.5	8.15819	8.09034	8.11506	8.15498	8.20316	8.23145
40	300.5	8.15822	8.0906	8.11496	8.15488	8.20335	8.23206
39	300.5	8.1585	8.09062	8.11532	8.1551	8.20362	8.23238
38	302.33	8.09063	8.01632	8.04231	8.08656	8.14094	8.1734
36	303.12	8.06589	7.98845	8.01506	8.06145	8.11862	8.15335
37	303.12	8.0658	7.98843	8.01488	8.06147	8.11872	8.15352
35	303.47	8.05661	7.97827	8.00484	8.05203	8.11008	8.14566
34	303.7	8.05114	7.97177	7.99916	8.04656	8.1053	8.14153
33	303.7	8.05118	7.9717	7.99923	8.04658	8.10542	8.14186
32	303.7	8.0514	7.97179	7.99944	8.04692	8.10566	8.14138
31	303.87	8.04731	7.96702	7.99473	8.04254	8.10201	8.1382
30	304.17	8.04149	7.96024	7.98841	8.03682	8.09691	8.13344
29	304.17	8.04154	7.96036	7.98848	8.03682	8.09702	8.134
28	304.39	8.03758	7.95527	7.98391	8.03297	8.09346	8.13055
27	304.46	8.0364	7.95395	7.98257	8.03199	8.09233	8.12929
26	304.46	8.03678	7.95426	7.98295	8.03224	8.09262	8.12996
25	304.64	8.03359	7.95055	7.97955	8.02939	8.08997	8.12789
24	305.17	8.02734	7.94183	7.97187	8.0235	8.08507	8.12466
23	305.35	8.02567	7.93962	7.96998	8.02189	8.08367	8.12357
22	305.5	8.02432	7.93745	7.96816	8.02036	8.08246	8.12271
21	305.5	8.02451	7.93771	7.96845	8.02073	8.08268	8.12265
20	307	8.01943	7.92709	7.96073	8.01488	8.08052	8.12012
19	307.38	8.01953	7.92642	7.96067	8.01492	8.08095	8.12099
18	307.38	8.01978	7.92663	7.96083	8.01517	8.08125	8.1214
17	307.4	8.01956	7.92647	7.96034	8.01489	8.08118	8.12094
16	307.7	8.01992	7.92639	7.96076	8.01523	8.08172	8.1217
15	308.3	8.02122	7.92936	7.9623	8.01651	8.08234	8.12282
14	308.8	8.02283	7.93176	7.96408	8.01832	8.08376	8.12425
13	310	8.02616	7.93854	7.96991	8.02134	8.08491	8.12532
12	311.028	8.02799	7.9422	7.97294	8.02301	8.08521	8.12447
11	311.1	8.02792	7.94205	7.97287	8.02295	8.08489	8.12396
10	311.1	8.02787	7.9425	7.97292	8.02275	8.08479	8.12383
9	312.8	8.02769	7.93286	7.97013	8.02562	8.08653	8.12292
8	314	8.02493	7.91916	7.96469	8.02315	8.08831	8.12568
7	320.2	8.01774	7.89303	7.94215	8.01809	8.09111	8.13675
6	320.2	8.01781	7.89302	7.94214	8.0183	8.09148	8.13693
5	331.362	8.26213	8.19401	8.22411	8.26097	8.30103	8.33322
4	331.395	8.26242	8.1948	8.22438	8.26118	8.30154	8.33361
3	331.919	8.26737	8.20173	8.23033	8.26566	8.30614	8.33738
2	331.993	8.26804	8.20236	8.23098	8.26629	8.30654	8.33806
1	332.454	8.27165	8.2055	8.2332	8.26967	8.31051	8.34188
0	333.317	8.27679	8.2064	8.235	8.2745	8.31885	8.35194

## Sheet: co2
	age	mean	5	16	50	84	95
103	265.193	197.204	64.3533	94.937	186.732	299.649	365.072
102	265.594	201.765	65.0498	96.3612	190.274	307.965	378.257
101	266.473	210.763	66.6187	99.3913	198.091	323.667	403.176
100	266.511	211.075	66.6787	99.4236	198.377	324.206	404.39
99	267.305	217.804	67.6172	101.095	204.272	335.659	426.753
98	269	226.201	68.3794	102.831	212.906	347.222	451.273
97	269	226.175	68.4064	102.9	212.893	347.411	450
96	270.2	226.895	67.9273	102.745	213.929	347.791	448.493
95	270.2	226.81	67.8986	102.727	213.856	347.63	447.945
94	271.49	223.661	67.2982	101.483	211.393	344.741	432.754
93	273	218.218	66.2667	100.162	206.364	339.034	416.842
92	273	218.268	66.3211	100.356	206.466	338.743	416.375
91	273.015	218.184	66.3636	100.323	206.357	338.757	416.353
90	275.81	223.063	67.8277	102.056	209.476	344.067	445.303
84	275.96	224.565	68.2422	102.724	210.726	346.333	448.769
85	275.96	224.558	68.3794	102.715	210.637	346.622	448.983
87	275.96	224.543	68.3137	102.664	210.633	346.118	448.889
89	275.96	224.551	68.3794	102.793	210.665	346.093	449.655
86	275.96	224.511	68.3858	102.561	210.66	346.309	448.548
88	275.96	224.505	68.2879	102.74	210.815	346.282	448.966
83	279.427	315.537	82.4686	132.434	274.31	512.785	686
82	280.325	362.194	88.3784	146.703	307.5	600	812.5
81	282.899	550.977	106.855	194.928	445	944.375	1334.55
80	289.754	860.645	135.673	262.333	664.487	1500	2214
79	291.254	700.091	121.913	228.125	545.921	1217.5	1752.67
78	292.276	566.957	110	199.921	448.947	980.303	1367.5
74	292.31	563.051	109.793	198.655	446.306	973.214	1359
76	292.31	562.74	109.861	198.655	446.296	972.069	1357.62
77	292.31	562.843	109.792	198.644	446.262	972.419	1356.67
75	292.31	563.106	109.86	198.655	446.667	973.065	1358.57
73	292.376	554.316	109.161	196.746	439.47	956.034	1334
72	292.376	554.144	109.021	196.772	439.683	956.481	1330.48
71	292.56	531.201	106.821	191.812	423.333	914.237	1265.88
70	292.924	486.6	102.333	181.197	391.286	832.535	1141.36
69	293	477.494	101.4	179.044	384.786	815.238	1115
68	293.52	419.322	95.5932	164	343.967	708.267	948.75
67	294.15	358.267	88.8718	146.842	302.054	593.981	778.667
66	294.63	319.024	84.2995	135.789	275.529	521.058	671.364
65	294.87	301.698	82.3182	130.644	263.493	489.32	625.714
64	296.185	234.285	72.7757	108.972	217.011	364.909	450.938
63	296.21	233.286	72.5746	108.589	216.213	363.22	448.642
62	296.53	223.218	71.0753	105.337	209.266	343.689	422.843
61	296.65	219.87	70.3559	104.278	207.273	336.978	413.945
60	296.65	219.98	70.4286	104.338	207.409	337.304	414.261
59	299.09	206.641	68.0078	101.282	200.804	310.136	377.533
58	299.25	208.461	68.4064	102.169	202.136	313	381.391
57	299.25	208.574	68.419	102.188	202.211	313.144	381.933
56	299.25	208.642	68.4524	102.179	202.313	313.568	382.48
55	299.25	208.61	68.4585	102.126	202.128	313.467	382.619
54	299.32	209.536	68.7449	102.477	202.676	314.421	384.918
53	299.32	209.406	68.6345	102.34	202.702	314.553	384.361
52	299.32	209.497	68.7045	102.394	202.535	314.554	384.926
51	299.35	209.933	68.8259	102.643	203.014	314.823	385.489
49	299.35	209.856	68.7449	102.575	203.018	315.207	385.294
50	299.35	209.957	68.8115	102.576	203.229	315.188	385.42
48	299.4	210.674	68.9516	102.76	203.843	316.17	387.133
47	300	221.159	70.8333	106.623	211.551	334.876	413.107
46	300	221.133	70.7576	106.623	211.76	334.634	411.98
45	300	221.181	70.7985	106.525	211.7	334.577	412.667
44	300	221.31	70.8429	106.732	211.807	334.627	413.238
43	300	221.244	70.8745	106.667	211.557	334.802	412.897
42	300.5	232.309	72.8814	109.814	219.919	356.364	439.286
41	300.5	232.321	72.8452	109.664	219.72	356.425	438.435
40	300.5	232.329	72.8452	109.696	219.718	356.591	439.908
39	300.5	232.16	72.8452	109.721	219.753	356.384	439.138
38	302.33	280.136	81.0698	125.462	252.581	450	555.536
36	303.12	299.649	83.9583	132.183	265.193	487.143	606.271
37	303.12	299.725	84	132.191	265.405	487.153	606.508
35	303.47	307.18	85.1309	134.5	270.155	501.417	625.301
34	303.7	311.53	85.9341	136.008	272.895	510	636.706
33	303.7	311.569	85.8696	136	272.896	510.403	636.538
32	303.7	311.375	85.7527	135.992	272.678	510	636.437
31	303.87	314.815	86.2842	137.076	274.525	516.239	646.216
30	304.17	319.546	86.978	138.423	277.551	524.571	659.194
29	304.17	319.542	86.978	138.395	277.565	524.495	659.231
28	304.39	322.795	87.4586	139.826	280.44	530.924	668.814
27	304.46	323.734	87.6836	140.132	280.611	532.101	672.532
26	304.46	323.475	87.6404	140.088	280.663	531.721	671.974
25	304.64	326.15	88.0791	141.255	282.283	536.667	679.31
24	305.17	331.263	88.8108	143.216	285.568	545.66	693.462
23	305.35	332.517	89.0217	143.767	286.578	547.264	698.235
22	305.5	333.546	88.9785	144.155	287.027	549.388	701.695
21	305.5	333.426	89.027	144.072	287.318	549.239	700.984
20	307	336.615	90.4455	146.78	289.372	552.644	720.256
19	307.38	336.211	90.5769	147.164	288.664	551.828	721.707
18	307.38	336.027	90.534	146.961	288.505	551.685	720
17	307.4	336.216	90.4878	147.015	288.66	551.685	722
16	307.7	335.66	90.7177	147.164	288.054	550.909	720.714
15	308.3	334.042	90.8019	146.798	286.103	545.949	718.367
14	308.8	332.65	90.7834	146.197	284.327	543.733	717.561
13	310	329.824	90.4955	144.756	279.665	541.935	710.784
12	311.028	329.065	90.4889	143.017	278.238	541.714	718.308
11	311.1	329.058	90.6278	143.045	277.992	541.644	718.983
10	311.1	329.196	90.5752	142.851	278.204	541.714	719.355
9	312.8	331.664	90.2913	139.669	278.778	544.146	733.077
8	314	335.833	90.3846	138.92	281.437	550	743.077
7	320.2	341.67	95.0595	142.259	293.51	552.267	750.732
6	320.2	341.651	95.0296	142.201	293.355	552.436	749.444
5	331.362	173.31	59.0476	86.6667	168.093	258.312	316.855
4	331.395	173.124	58.9048	86.6216	167.899	258.182	316.387
3	331.919	170.916	57.5983	85.5263	166.712	255.568	308.443
2	331.993	170.5	57.3391	85.3396	166.57	254.799	306.393
1	332.454	168.935	56.2753	84.4091	166.164	253.027	299.56
0	333.317	166.885	54.5455	82.7615	166.424	249.51	290

## Sheet: dic
	age	mean	5	16	50	84	95
103	265.193	1539.16	534.815	802.5	1517.27	2304.68	2596.4
102	265.594	1542.75	532.963	797.907	1514.17	2316.94	2623.67
101	266.473	1548.92	528.333	792.432	1509.32	2343.86	2676.88
100	266.511	1549.2	528.056	792	1508.5	2344.29	2680.29
99	267.305	1553.58	525.385	789.062	1501.64	2364.86	2719.05
98	269	1557.68	521.842	783.095	1489.33	2387.02	2763.68
97	269	1557.58	521.944	782.727	1489.33	2386.67	2763.33
96	270.2	1557.78	523.59	782.727	1483.19	2393.33	2773.18
95	270.2	1557.31	523.59	783.333	1482.34	2392.82	2771.9
94	271.49	1555.49	526.279	786.667	1479.41	2396.59	2762.5
93	273	1553.61	527.879	788.125	1482.89	2395.43	2742.5
92	273	1553.58	527.941	788.065	1482.89	2395.43	2743.44
91	273.015	1553.55	527.5	787.879	1482.34	2395.83	2743.03
90	275.81	1562.14	522.903	779.429	1486.98	2424.55	2765.71
84	275.96	1563	523.333	778.824	1486.11	2430.29	2773.57
85	275.96	1563.08	522.727	778.889	1485.68	2430.33	2774.44
87	275.96	1563.16	522.647	779.118	1486.15	2430.98	2773
89	275.96	1563.16	522.647	778.649	1486.32	2430.3	2771.88
86	275.96	1562.99	522.121	778.649	1486.41	2429.5	2773.33
88	275.96	1563.04	522.667	778.684	1486.11	2429.71	2771.87
83	279.427	1602.31	481.875	720.2	1425.22	2671.61	3114.5
82	280.325	1613.53	463.913	693.158	1390	2750.74	3230.56
81	282.899	1640.3	405.51	618.667	1343.78	2936.15	3531.43
80	289.754	1661.74	352.222	550	1313.8	3059.33	3766
79	291.254	1653.76	376.182	578.393	1325	3007.27	3669.29
78	292.276	1643.79	401.22	614.8	1342	2941.33	3553.64
74	292.31	1643.46	401.795	615.814	1342.55	2940	3550
76	292.31	1643.39	401.75	616.047	1342.4	2938	3548.75
77	292.31	1643.47	402.143	616.047	1342.61	2938.75	3548.46
75	292.31	1643.52	402.195	615.909	1342.65	2939	3551
73	292.376	1642.62	403.59	620	1343.7	2932.86	3540
72	292.376	1642.54	403.421	619.643	1343.6	2933.08	3540
71	292.56	1640.4	408.81	626.19	1347.75	2919.23	3513.64
70	292.924	1635.34	418.947	641.333	1354.35	2885.26	3457.86
69	293	1634.28	421.111	645.294	1355.71	2877	3447.86
68	293.52	1625.81	438.571	666	1369.33	2821.43	3358
67	294.15	1614.23	459.024	696.486	1391.76	2745	3228.95
66	294.63	1604.81	473.519	713.721	1415.83	2674.76	3128.57
65	294.87	1599.88	480.909	717.857	1434.17	2634.8	3084.67
64	296.185	1574.67	509.75	745.429	1507.35	2437.14	2859.29
63	296.21	1574.23	510.732	745.952	1509.36	2432.97	2854.38
62	296.53	1569.3	514.25	750.256	1522.67	2393.44	2811.43
61	296.65	1567.49	515.455	753.913	1527.41	2379.72	2795.71
60	296.65	1567.75	515.484	753.778	1527.31	2379.71	2796.5
59	299.09	1561.5	517.727	757.222	1553.93	2332.17	2725.77
58	299.25	1562.19	515.4	754.706	1550.24	2335.75	2736.25
57	299.25	1562.53	515.769	755.294	1550.68	2337.25	2737.14
56	299.25	1562.48	515.962	755.405	1551.04	2337.11	2736.96
55	299.25	1562.8	515.686	754.865	1551.09	2337.63	2738.7
54	299.32	1563.33	515.51	754.167	1549.46	2339.74	2744.23
53	299.32	1562.81	515.306	754.286	1548.89	2339.23	2741.48
52	299.32	1563.24	515.306	754.054	1549.41	2340	2743.93
51	299.35	1563.35	515.306	753.143	1548.89	2340.29	2746.15
49	299.35	1563.3	515.4	753.889	1548.79	2340.88	2745.36
50	299.35	1563.33	515	753.056	1549.04	2339.77	2744.29
48	299.4	1563.53	515.306	752.857	1548.3	2342.19	2748.75
47	300	1570.15	507.059	744.167	1536.22	2378.71	2804.74
46	300	1570.19	507	744.359	1536	2379.68	2802.73
45	300	1570.2	506.809	744.211	1536.5	2380	2803.64
44	300	1570.16	506.863	744.211	1536.89	2379.2	2805.45
43	300	1570.19	506.863	743.75	1536.44	2379.37	2804
42	300.5	1576.16	500	735.897	1526.96	2414.35	2849.52
41	300.5	1576.18	500	735.641	1526.83	2414.35	2848.64
40	300.5	1576.15	500	735.714	1527.02	2414.09	2850.83
39	300.5	1576.12	499.792	735.789	1527.17	2415	2850.83
38	302.33	1596.22	473.023	713.333	1475.95	2560.71	3048.75
36	303.12	1602.51	464.884	707.714	1458.06	2613.46	3120.77
37	303.12	1602.42	465	707.222	1457.11	2612.8	3119.23
35	303.47	1604.42	461.111	703.25	1448.61	2631.43	3145.56
34	303.7	1605.31	458.333	701.463	1443.43	2638.42	3157.78
33	303.7	1605.45	458.333	701.628	1443.75	2637.78	3157.22
32	303.7	1605.35	458.511	701.667	1444.12	2637.78	3157.65
31	303.87	1606.17	457.292	699.73	1440.51	2644	3168.75
30	304.17	1607.12	454.894	697.714	1436.32	2650	3184.74
29	304.17	1607.11	455.306	697.838	1435.95	2650.56	3184.44
28	304.39	1607.77	453.878	696.25	1432.5	2654.5	3193.33
27	304.46	1607.77	453.261	695.625	1430.97	2655	3197.5
26	304.46	1607.86	453.478	695.882	1431.76	2656	3195.29
25	304.64	1608.26	452.391	694.103	1428.21	2660	3202.73
24	305.17	1608.83	449.756	691.29	1423.41	2661.88	3214.44
23	305.35	1608.78	448.837	690.909	1423.27	2659.52	3216.43
22	305.5	1608.73	448.222	691.053	1422.27	2660.71	3217.5
21	305.5	1608.77	448.14	691.053	1422.08	2660.71	3217.89
20	307	1606.99	445.111	685.278	1417.37	2656.25	3240.56
19	307.38	1606.29	444.186	684.474	1415.79	2655.36	3241.33
18	307.38	1606.39	444.667	684	1415.24	2655	3240.56
17	307.4	1606.42	444.545	684.324	1415.5	2654.62	3241.43
16	307.7	1605.88	444.348	683.824	1414.88	2653.91	3240
15	308.3	1604.86	444.255	682.778	1414.15	2653	3235.45
14	308.8	1604.45	445.102	682.571	1412.11	2653.48	3234.29
13	310	1603.74	442.708	683.235	1410.75	2655.19	3237.14
12	311.028	1604.3	439.25	684.375	1407.92	2658.33	3247.86
11	311.1	1604.16	439.143	684.545	1408.12	2656.67	3247.86
10	311.1	1604.24	439.189	684.375	1407.78	2655.91	3248.46
9	312.8	1606.42	434.762	687.222	1406.51	2659	3260.77
8	314	1608.8	430.286	687.647	1408.16	2662.78	3267
7	320.2	1613.16	423.953	689.394	1431.58	2655	3248.89
6	320.2	1613.19	423.953	689.677	1432.05	2656	3250
5	331.362	1550.29	524.186	786.944	1595.27	2293	2578.57
4	331.395	1550.07	524.419	787.297	1595.08	2293.33	2575.22
3	331.919	1550.91	528.286	790.976	1596.1	2289.42	2553.23
2	331.993	1550.06	528.438	792.045	1596.72	2287.95	2547
1	332.454	1550.25	531.333	796.216	1597.12	2287.11	2530
0	333.317	1549.85	533.714	803.111	1594.65	2278.36	2508.97

## Sheet: alkalinity
	age	mean	5	16	50	84	95
103	265.193	1800.6	696.129	988.333	1781.88	2645	2961.67
102	265.594	1801.5	691.538	981.892	1772.55	2657.71	2981.11
101	266.473	1802.81	685.938	971.316	1754.35	2678.75	3032.92
100	266.511	1802.99	685.294	971.081	1753.26	2680.29	3036.3
99	267.305	1804.62	680	963.793	1742	2702.08	3067.08
98	269	1807.85	675	956.757	1725.66	2726.34	3111.43
97	269	1807.76	674.706	956.216	1725.85	2726.96	3111.9
96	270.2	1811.46	679.2	961.053	1723.66	2737.07	3122.38
95	270.2	1810.95	678.8	961.579	1722.82	2736.82	3121.36
94	271.49	1815.73	685.862	969.5	1729.32	2749.43	3131.07
93	273	1823.06	693.214	979.167	1744.04	2762.07	3129.5
92	273	1822.94	692.963	978.378	1744.29	2761.43	3131.21
91	273.015	1823	693.333	979.118	1743.66	2762.07	3128.75
90	275.81	1835.7	690.938	974.118	1751.8	2794.39	3157.37
84	275.96	1835.61	690.294	973.077	1748.48	2800	3165.33
85	275.96	1835.73	690.303	973.25	1748.04	2800.54	3164.71
87	275.96	1835.84	690.294	973.421	1748.81	2798.42	3164.29
89	275.96	1835.84	689.444	972.632	1748.26	2798.86	3164.5
86	275.96	1835.68	690	972.778	1748.48	2798.48	3164.44
88	275.96	1835.7	690.588	972.941	1748.12	2798.38	3164.38
83	279.427	1819.67	612.609	865	1625.9	2963.75	3459.38
82	280.325	1808.64	581.702	821.19	1567.91	3020.56	3553.64
81	282.899	1773.89	492.326	703.333	1462.79	3115	3766.25
80	289.754	1742.53	412.281	606.429	1385.76	3163.33	3910.83
79	291.254	1761.55	451.429	647.869	1423.56	3149.41	3868
78	292.276	1781.04	491	701.75	1468.33	3126.11	3803.33
74	292.31	1781.74	492.558	704.615	1469.71	3125.29	3802.22
76	292.31	1781.73	492.444	704.634	1469.72	3125.29	3800.62
77	292.31	1781.78	492.667	704.872	1469.72	3125.29	3802.35
75	292.31	1781.78	492.5	704.634	1469.43	3125.29	3801.76
73	292.376	1783.15	495.172	707.955	1471.33	3123.68	3795
72	292.376	1783.08	495	708.095	1470.65	3123.33	3795.83
71	292.56	1787.22	502.581	719.778	1480.28	3118.82	3779.33
70	292.924	1795.48	520.698	743.725	1501.4	3104.37	3743.12
69	293	1797.35	523.143	749.4	1505.64	3100	3735.24
68	293.52	1809.52	550.833	788.421	1538.29	3072.17	3669.47
67	294.15	1824.42	584.39	835	1584	3032.67	3581.54
66	294.63	1835.54	608.2	866.098	1631.67	2991.43	3507.86
65	294.87	1840.77	620.789	880.303	1660.24	2967.89	3469
64	296.185	1863.83	676.667	942.222	1789.11	2817.6	3285.88
63	296.21	1864.25	678.125	942.778	1791.67	2815.65	3282
62	296.53	1868.06	686.216	954.889	1818.96	2787.2	3244.37
61	296.65	1869.24	688.125	960.357	1828.91	2776.92	3230.63
60	296.65	1869.44	688.235	959.778	1828.86	2777.6	3234.78
59	299.09	1875.17	696.316	969.302	1870.85	2748.8	3176.67
58	299.25	1873.85	692.857	965.909	1863.51	2749.39	3186.92
57	299.25	1874.17	693.421	965.75	1864.71	2750	3187.39
56	299.25	1874.03	694.103	965.61	1864.67	2751.25	3187.39
55	299.25	1874.49	693.947	965.854	1865	2751.03	3188.33
54	299.32	1874.05	691.667	963.846	1861.29	2751.11	3191.82
53	299.32	1873.52	691.765	963.81	1862.37	2751.38	3189.66
52	299.32	1873.99	691.622	963.158	1862.57	2751.43	3192.31
51	299.35	1873.6	690.882	962.222	1860.51	2752.14	3193.7
49	299.35	1873.63	690.833	962.703	1860.61	2752.41	3192.76
50	299.35	1873.55	691.111	962.162	1860.24	2752.22	3192.22
48	299.4	1872.98	690.571	962	1858.46	2753.23	3196.4
47	300	1869.67	677.381	945.806	1836.21	2771.54	3239.55
46	300	1869.71	677.561	946.129	1836	2772.59	3239.05
45	300	1869.67	677.179	945.667	1836.41	2772.5	3240
44	300	1869.5	677.317	945.161	1836.55	2771.25	3239.58
43	300	1869.6	677.436	945.938	1836.18	2771.54	3238.4
42	300.5	1865.6	663.75	930.612	1815.25	2800.63	3280.95
41	300.5	1865.59	663.846	930.6	1815	2801	3279.57
40	300.5	1865.58	664.359	930.196	1814.88	2799.35	3281.43
39	300.5	1865.7	664	930.6	1815.5	2800	3281.74
38	302.33	1848.39	614.75	874.375	1719.21	2900.71	3445.71
36	303.12	1841.71	599.375	858.387	1685.56	2940	3498.95
37	303.12	1841.57	599.375	858.056	1685.2	2941	3498.33
35	303.47	1838.84	592.5	851.944	1671.91	2950.95	3518.67
34	303.7	1836.97	587.805	848.182	1662.25	2958	3530.63
33	303.7	1837.12	587.727	848.065	1663.16	2957	3530
32	303.7	1837.13	588.333	848.438	1663.49	2957.78	3530.63
31	303.87	1835.86	585.526	846.552	1657.59	2961.18	3540.56
30	304.17	1833.92	581.143	842.593	1650.6	2965.79	3548.75
29	304.17	1833.91	581.944	843	1650.62	2967.33	3549.29
28	304.39	1832.62	578.947	841.111	1645.33	2969.37	3556.67
27	304.46	1832.01	578.438	840	1643.64	2970.45	3559.41
26	304.46	1832.29	578.571	840.541	1644.26	2970.91	3559.47
25	304.64	1831.09	576.765	838	1638.46	2972.5	3560.71
24	305.17	1828.59	570	831.071	1631.18	2975.38	3574.12
23	305.35	1827.73	569.167	829.31	1630.29	2974.62	3575.71
22	305.5	1827.06	568.511	828.333	1629.21	2975.38	3580
21	305.5	1827.17	568.636	828	1629.44	2975.38	3578.57
20	307	1822.97	564.906	817.857	1622.05	2968.5	3580
19	307.38	1822.34	564.043	816.8	1620.71	2965.63	3580.91
18	307.38	1822.56	564.545	817.917	1620.5	2966.67	3581.67
17	307.4	1822.48	564	816.4	1620.48	2966.32	3581.43
16	307.7	1822.16	563.83	816.071	1619.09	2962.67	3580.71
15	308.3	1821.82	562.632	816.571	1618.24	2959.41	3572.86
14	308.8	1822.2	564.324	817.419	1618.28	2960	3569.44
13	310	1823.28	563.125	820	1615.13	2962.5	3578.57
12	311.028	1825.03	560.476	824.516	1614.77	2965	3590
11	311.1	1824.91	559.024	825	1614	2965.38	3590
10	311.1	1824.93	559.744	825.152	1614.52	2964.44	3591.67
9	312.8	1828.12	550.968	833.667	1615.25	2967.65	3605.88
8	314	1830.58	546.667	836.897	1616.53	2972	3615.45
7	320.2	1846.66	537.742	840.93	1650.8	2990.43	3622.67
6	320.2	1846.74	537.667	840.714	1651.37	2990.38	3622.86
5	331.362	1983.69	764	1077.58	2042.5	2853.41	3162.67
4	331.395	1983.82	764.8	1078.75	2042.44	2852.16	3161.33
3	331.919	1990.88	774.545	1090.65	2046.97	2858.7	3153.24
2	331.993	1990.7	775.652	1091.6	2047.69	2858.43	3149.39
1	332.454	1995.54	784	1101.94	2046.84	2863.75	3142.19
0	333.317	2002	794.483	1116.05	2049.25	2866.03	3128.33

## Sheet: saturation_state
	age	mean	5	16	50	84	95
103	265.193	5.24496	1.87	2.74167	5.15526	7.91917	9.13556
102	265.594	5.20138	1.847	2.70762	5.071	7.86385	9.13071
101	266.473	5.12616	1.81364	2.63545	4.93467	7.79	9.13875
100	266.511	5.12516	1.81286	2.63	4.93	7.79333	9.14091
99	267.305	5.08949	1.79588	2.58471	4.88	7.729	9.19444
98	269	5.10981	1.80529	2.56813	4.84971	7.78375	9.38
97	269	5.10956	1.80429	2.56533	4.8625	7.78333	9.36895
96	270.2	5.20545	1.85077	2.61917	4.94316	7.92222	9.56571
95	270.2	5.20395	1.84833	2.61957	4.93444	7.92304	9.57
94	271.49	5.36447	1.90462	2.73762	5.09	8.17667	9.78571
93	273	5.58757	2.00227	2.89385	5.30524	8.47	10.025
92	273	5.58574	2.00174	2.89267	5.30423	8.469	10.025
91	273.015	5.58823	2.0024	2.89429	5.305	8.47222	10.0244
90	275.81	5.76207	2.02654	2.98952	5.44562	8.69929	10.36
84	275.96	5.74767	2.0225	2.97933	5.4175	8.68875	10.3621
85	275.96	5.74848	2.022	2.97875	5.42	8.685	10.3623
87	275.96	5.7495	2.02304	2.97875	5.42	8.68833	10.3654
89	275.96	5.7495	2.02167	2.97812	5.42357	8.69	10.365
86	275.96	5.74952	2.0212	2.97765	5.42	8.69083	10.3662
88	275.96	5.7492	2.02136	2.97762	5.42	8.691	10.3633
83	279.427	4.74712	1.55565	2.1536	4.17389	7.62	9.52
82	280.325	4.3271	1.37826	1.875	3.73632	7.07222	9.0275
81	282.899	3.19621	0.90697	1.19205	2.62857	5.48	7.332
80	289.754	2.35357	0.568721	0.78381	1.87455	4.184	5.75
79	291.254	2.85122	0.759143	1.01395	2.321	5.004	6.766
78	292.276	3.42807	0.971034	1.30703	2.84909	5.92909	7.8725
74	292.31	3.44872	0.980323	1.31854	2.87	5.96286	7.905
76	292.31	3.4502	0.978889	1.3185	2.8735	5.97273	7.91333
77	292.31	3.44951	0.980323	1.31846	2.87235	5.96833	7.9025
75	292.31	3.44856	0.980323	1.31811	2.8705	5.9625	7.90333
73	292.376	3.4946	0.995152	1.344	2.91609	6.036	7.9825
72	292.376	3.49477	0.996061	1.34412	2.91611	6.04111	7.99
71	292.56	3.62252	1.04342	1.42179	3.02667	6.225	8.21333
70	292.924	3.89713	1.13483	1.57778	3.27977	6.63565	8.678
69	293	3.9588	1.16615	1.61174	3.35167	6.73429	8.78
68	293.52	4.39644	1.33579	1.86522	3.77424	7.37375	9.48
67	294.15	4.9719	1.56267	2.2	4.34034	8.17111	10.32
66	294.63	5.42833	1.74	2.4675	4.83375	8.77778	10.9188
65	294.87	5.65724	1.82692	2.60067	5.09852	9.03929	11.184
64	296.185	6.77222	2.2705	3.29625	6.53875	10.34	12.33
63	296.21	6.79208	2.27524	3.31429	6.55893	10.3522	12.3467
62	296.53	7.00109	2.36286	3.45333	6.8419	10.5843	12.51
61	296.65	7.07303	2.39571	3.50154	6.94	10.6522	12.5625
60	296.65	7.0722	2.396	3.50042	6.93667	10.66	12.5629
59	299.09	7.43714	2.502	3.65125	7.432	11.1106	12.85
58	299.25	7.39654	2.47833	3.612	7.38	11.07	12.8389
57	299.25	7.39613	2.48167	3.6175	7.38154	11.066	12.84
56	299.25	7.39409	2.48286	3.61615	7.3805	11.0727	12.84
55	299.25	7.39769	2.48222	3.61556	7.3819	11.076	12.8362
54	299.32	7.37829	2.47	3.6	7.34781	11.0517	12.832
53	299.32	7.37737	2.47	3.60222	7.34682	11.0575	12.8317
52	299.32	7.37879	2.47	3.6	7.3625	11.055	12.8233
51	299.35	7.36828	2.45923	3.59462	7.3432	11.0392	12.8275
49	299.35	7.3699	2.4675	3.595	7.34391	11.0363	12.8311
50	299.35	7.36768	2.46286	3.59167	7.34056	11.0369	12.83
48	299.4	7.35098	2.458	3.58455	7.30958	11.0233	12.8275
47	300	7.14513	2.364	3.41556	7.03231	10.81	12.6925
46	300	7.14575	2.365	3.42	7.034	10.8137	12.6946
45	300	7.14468	2.36333	3.42	7.01826	10.8129	12.6955
44	300	7.14147	2.3625	3.40909	7.031	10.8057	12.695
43	300	7.14317	2.3625	3.41778	7.03375	10.8087	12.6946
42	300.5	6.93165	2.24944	3.25208	6.73091	10.6124	12.53
41	300.5	6.93108	2.2475	3.25367	6.72889	10.6107	12.5367
40	300.5	6.93108	2.25053	3.25296	6.73111	10.6085	12.5273
39	300.5	6.93486	2.25111	3.25273	6.73688	10.6139	12.532
38	302.33	6.13564	1.88818	2.73	5.61625	9.83667	11.7175
36	303.12	5.86314	1.79286	2.54704	5.28429	9.52667	11.4
37	303.12	5.86152	1.79462	2.54792	5.28462	9.527	11.4029
35	303.47	5.76357	1.75333	2.49667	5.171	9.4075	11.2686
34	303.7	5.70739	1.72812	2.45923	5.09933	9.34667	11.1944
33	303.7	5.7077	1.728	2.46067	5.11308	9.34429	11.1938
32	303.7	5.71005	1.72765	2.46167	5.11125	9.346	11.1938
31	303.87	5.66736	1.71167	2.43824	5.05545	9.28722	11.1425
30	304.17	5.61005	1.68429	2.40714	5.0025	9.22571	11.084
29	304.17	5.60999	1.68737	2.405	5.00667	9.22714	11.0829
28	304.39	5.57206	1.65737	2.38357	4.956	9.18154	11.032
27	304.46	5.55996	1.64944	2.37556	4.94571	9.16667	11.024
26	304.46	5.56446	1.65182	2.378	4.95231	9.17333	11.0233
25	304.64	5.53282	1.63952	2.35833	4.91833	9.1325	10.9967
24	305.17	5.47846	1.62372	2.31917	4.87	9.07667	10.9433
23	305.35	5.46525	1.61708	2.29815	4.862	9.06429	10.94
22	305.5	5.45533	1.61	2.29292	4.84938	9.03875	10.93
21	305.5	5.45709	1.61136	2.29333	4.84833	9.03917	10.93
20	307	5.44609	1.58167	2.25391	4.869	9.0335	10.9
19	307.38	5.45909	1.58	2.25	4.88444	9.062	10.906
18	307.38	5.46228	1.58133	2.25364	4.89077	9.06583	10.9171
17	307.4	5.4606	1.58158	2.25	4.888	9.06231	10.914
16	307.7	5.47465	1.58	2.255	4.89727	9.08	10.941
15	308.3	5.50916	1.578	2.27522	4.937	9.13143	10.9933
14	308.8	5.54308	1.58667	2.29536	4.966	9.1725	11.052
13	310	5.62304	1.59857	2.36133	5.01833	9.28636	11.1667
12	311.028	5.68473	1.5775	2.42364	5.07167	9.36933	11.245
11	311.1	5.68758	1.57	2.42857	5.06	9.38444	11.255
10	311.1	5.68591	1.57588	2.426	5.05783	9.36786	11.2475
9	312.8	5.76959	1.51375	2.509	5.13455	9.46167	11.366
8	314	5.81855	1.48182	2.57143	5.178	9.51	11.47
7	320.2	6.40307	1.534	2.725	5.76941	10.4425	12.8367
6	320.2	6.40417	1.53375	2.72333	5.78083	10.4455	12.8425
5	331.362	12.6444	4.394	6.495	13.076	18.7117	20.3586
4	331.395	12.6574	4.402	6.50571	13.0825	18.735	20.3683
3	331.919	12.8915	4.55833	6.702	13.235	19.0629	20.6875
2	331.993	12.9162	4.5775	6.735	13.25	19.0967	20.7167
1	332.454	13.0972	4.69667	6.89	13.4025	19.3477	20.9614
0	333.317	13.3788	4.9	7.14	13.57	19.6988	21.2825

## Sheet: strontium
	age	mean	5	16	50	84	95
103	265.193	0.706817	0.706811	0.706812	0.706815	0.706819	0.706823
102	265.594	0.706847	0.706841	0.706842	0.706845	0.706849	0.70685
101	266.473	0.706901	0.706893	0.706899	0.706904	0.706908	0.706909
100	266.511	0.706903	0.7069	0.706902	0.706905	0.706908	0.706909
99	267.305	0.706939	0.706931	0.706932	0.706936	0.706939	0.706945
98	269	0.70698	0.706971	0.706973	0.706981	0.706987	0.706989
97	269	0.70698	0.706971	0.706973	0.706981	0.706987	0.706989
96	270.2	0.706988	0.706981	0.706982	0.706985	0.706989	0.706992
95	270.2	0.706988	0.706981	0.706982	0.706985	0.706989	0.706992
94	271.49	0.706985	0.70698	0.706982	0.706985	0.706988	0.706989
93	273	0.706976	0.70697	0.706972	0.706975	0.706978	0.706979
92	273	0.706976	0.70697	0.706972	0.706975	0.706978	0.706979
91	273.015	0.706976	0.70697	0.706972	0.706975	0.706978	0.706979
90	275.81	0.706977	0.706971	0.706972	0.706975	0.706979	0.70698
84	275.96	0.706978	0.706971	0.706972	0.706976	0.70698	0.706986
85	275.96	0.706978	0.706971	0.706972	0.706976	0.70698	0.706986
87	275.96	0.706978	0.706971	0.706972	0.706976	0.70698	0.706986
89	275.96	0.706978	0.706971	0.706972	0.706976	0.70698	0.706986
86	275.96	0.706978	0.706971	0.706972	0.706976	0.70698	0.706986
88	275.96	0.706978	0.706971	0.706972	0.706976	0.70698	0.706986
83	279.427	0.707047	0.707041	0.707042	0.707045	0.707048	0.70705
82	280.325	0.707073	0.70707	0.707071	0.707075	0.707078	0.707079
81	282.899	0.70715	0.707141	0.707143	0.707149	0.707157	0.707159
80	289.754	0.707379	0.707371	0.707372	0.707376	0.70738	0.707387
79	291.254	0.707466	0.70746	0.707462	0.707465	0.707468	0.707469
78	292.276	0.707538	0.70753	0.707532	0.707535	0.707538	0.707539
74	292.31	0.70754	0.707539	0.707541	0.707545	0.707548	0.707549
76	292.31	0.70754	0.707539	0.707541	0.707545	0.707548	0.707549
77	292.31	0.70754	0.707539	0.707541	0.707545	0.707548	0.707549
75	292.31	0.70754	0.707539	0.707541	0.707545	0.707548	0.707549
73	292.376	0.707545	0.70754	0.707542	0.707545	0.707548	0.707549
72	292.376	0.707545	0.70754	0.707542	0.707545	0.707548	0.707549
71	292.56	0.707559	0.707551	0.707552	0.707555	0.707559	0.70756
70	292.924	0.707588	0.70758	0.707582	0.707585	0.707588	0.707589
69	293	0.707594	0.70759	0.707592	0.707595	0.707598	0.707599
68	293.52	0.707636	0.70763	0.707632	0.707635	0.707638	0.707639
67	294.15	0.70769	0.707681	0.707683	0.707689	0.707696	0.707699
66	294.63	0.707732	0.70773	0.707731	0.707735	0.707738	0.707739
65	294.87	0.707753	0.70775	0.707752	0.707755	0.707758	0.707759
64	296.185	0.707868	0.707861	0.707862	0.707866	0.707869	0.707875
63	296.21	0.707871	0.707862	0.707865	0.707873	0.707878	0.707879
62	296.53	0.707898	0.707891	0.707892	0.707895	0.707899	0.707902
61	296.65	0.707908	0.707901	0.707902	0.707905	0.707909	0.707913
60	296.65	0.707908	0.707901	0.707902	0.707905	0.707909	0.707913
59	299.09	0.708091	0.708082	0.708088	0.708094	0.708098	0.708099
58	299.25	0.708101	0.708092	0.708097	0.708104	0.708108	0.708109
57	299.25	0.708101	0.708092	0.708097	0.708104	0.708108	0.708109
56	299.25	0.708101	0.708092	0.708097	0.708104	0.708108	0.708109
55	299.25	0.708101	0.708092	0.708097	0.708104	0.708108	0.708109
54	299.32	0.708105	0.7081	0.708102	0.708105	0.708108	0.708109
53	299.32	0.708105	0.7081	0.708102	0.708105	0.708108	0.708109
52	299.32	0.708105	0.7081	0.708102	0.708105	0.708108	0.708109
51	299.35	0.708107	0.7081	0.708102	0.708105	0.708108	0.708109
49	299.35	0.708107	0.7081	0.708102	0.708105	0.708108	0.708109
50	299.35	0.708107	0.7081	0.708102	0.708105	0.708108	0.708109
48	299.4	0.70811	0.708101	0.708102	0.708108	0.708116	0.708119
47	300	0.708143	0.70814	0.708142	0.708145	0.708148	0.708149
46	300	0.708143	0.70814	0.708142	0.708145	0.708148	0.708149
45	300	0.708143	0.70814	0.708142	0.708145	0.708148	0.708149
44	300	0.708143	0.70814	0.708142	0.708145	0.708148	0.708149
43	300	0.708143	0.70814	0.708142	0.708145	0.708148	0.708149
42	300.5	0.708167	0.70816	0.708162	0.708165	0.708168	0.708169
41	300.5	0.708167	0.70816	0.708162	0.708165	0.708168	0.708169
40	300.5	0.708167	0.70816	0.708162	0.708165	0.708168	0.708169
39	300.5	0.708167	0.70816	0.708162	0.708165	0.708168	0.708169
38	302.33	0.708229	0.70822	0.708222	0.708225	0.708228	0.708229
36	303.12	0.708244	0.70824	0.708242	0.708245	0.708248	0.708249
37	303.12	0.708244	0.70824	0.708242	0.708245	0.708248	0.708249
35	303.47	0.708249	0.70824	0.708242	0.708245	0.708248	0.708249
34	303.7	0.708251	0.70825	0.708252	0.708255	0.708258	0.708259
33	303.7	0.708251	0.70825	0.708252	0.708255	0.708258	0.708259
32	303.7	0.708251	0.70825	0.708252	0.708255	0.708258	0.708259
31	303.87	0.708253	0.70825	0.708252	0.708255	0.708258	0.708259
30	304.17	0.708256	0.70825	0.708252	0.708255	0.708258	0.708259
29	304.17	0.708256	0.70825	0.708252	0.708255	0.708258	0.708259
28	304.39	0.708257	0.70825	0.708252	0.708255	0.708258	0.708259
27	304.46	0.708258	0.70825	0.708252	0.708255	0.708258	0.708259
26	304.46	0.708258	0.70825	0.708252	0.708255	0.708258	0.708259
25	304.64	0.708259	0.70825	0.708252	0.708255	0.708258	0.708259
24	305.17	0.708261	0.70826	0.708262	0.708265	0.708268	0.708269
23	305.35	0.708261	0.70826	0.708262	0.708265	0.708268	0.708269
22	305.5	0.708262	0.70826	0.708262	0.708265	0.708268	0.708269
21	305.5	0.708262	0.70826	0.708262	0.708265	0.708268	0.708269
20	307	0.708265	0.70826	0.708262	0.708265	0.708268	0.708269
19	307.38	0.708266	0.70826	0.708262	0.708265	0.708268	0.708269
18	307.38	0.708266	0.70826	0.708262	0.708265	0.708268	0.708269
17	307.4	0.708266	0.70826	0.708262	0.708265	0.708268	0.708269
16	307.7	0.708267	0.70826	0.708262	0.708265	0.708268	0.708269
15	308.3	0.708269	0.708261	0.708262	0.708265	0.708268	0.70827
14	308.8	0.708273	0.70827	0.708272	0.708275	0.708278	0.708279
13	310	0.708284	0.70828	0.708282	0.708285	0.708288	0.708289
12	311.028	0.708297	0.708291	0.708292	0.708295	0.708299	0.7083
11	311.1	0.708298	0.708291	0.708292	0.708296	0.7083	0.708306
10	311.1	0.708298	0.708291	0.708292	0.708296	0.7083	0.708306
9	312.8	0.708323	0.708314	0.70832	0.708324	0.708328	0.708329
8	314	0.708337	0.70833	0.708332	0.708336	0.708342	0.708347
7	320.2	0.708213	0.708194	0.708202	0.708213	0.708224	0.70823
6	320.2	0.708213	0.708194	0.708202	0.708213	0.708224	0.70823
5	331.362	0.707812	0.707802	0.707805	0.707813	0.707818	0.70782
4	331.395	0.707814	0.707803	0.707808	0.707814	0.707819	0.707822
3	331.919	0.707846	0.70784	0.707842	0.707846	0.70785	0.707856
2	331.993	0.707852	0.707841	0.707845	0.707852	0.707858	0.707859
1	332.454	0.707886	0.70788	0.707882	0.707886	0.70789	0.707896
0	333.317	0.707966	0.707956	0.707961	0.707965	0.70797	0.707977

[truncated: 2 more sheets: d18O, d13C]
