# Supplementary material for: Rapid rise in atmospheric CO2 marked the end of the Late Palaeozoic Ice Age
Source: Nat Geosci. 2025 Jan 6;18(1):91–7. doi: 10.1038/s41561-024-01610-2 (PMC11732749; doi:10.1038/s41561-024-01610-2)
Supplement: Supplementary file 4 — Interpolated records (including pH and CO2) at 100 kyr resolution, main scenario. [file 41561_2024_1610_MOESM4_ESM.xlsx]

## Sheet: description
Supplementary Data to Jurikova et al. 'Rapid rise in atmospheric CO2 marked the end of the Late Palaeozoic Ice Age'
Data S3	Interpolated records (including pH, CO2) at 100 kyr resolution, main scenario (assuming constant d18Osw)
	All interpolations provided with mean values and 5, 16, 50, 84, and 95 % confidence intervals
tab	description
d11B4	d11B borate (‰), calibrated using new brachiopod calibration, see Supplementary Information
d11Bm	d11B measured = d11B brachiopod (‰)
d11Bsw	d11B seawater (‰) reconstructed
pH	pH
CO2	CO2 (ppm)
dic	dissolved inorganic carbon (μmol/kg)
alkalinity	alkalinity (μmol/kg)
saturation_state	calcite saturation state
strontium	87Sr/86Sr
d18O	d18O (‰)
d13C	d13C (‰)

## Sheet: d11B4
	age	mean	5	16	50	84	95
750	265	8.62024	8.20305	8.33423	8.59671	8.89667	9.08735
749	265.1	8.63926	8.22415	8.36083	8.61507	8.91145	9.09724
748	265.2	8.65373	8.24225	8.38044	8.62929	8.92668	9.10274
747	265.3	8.67269	8.27197	8.40822	8.64962	8.93721	9.11419
746	265.4	8.68612	8.2914	8.42226	8.66222	8.94971	9.12747
745	265.5	8.70492	8.31209	8.44428	8.68362	8.96585	9.14194
744	265.6	8.71658	8.32757	8.45852	8.69558	8.97351	9.15205
743	265.7	8.73073	8.3405	8.47726	8.70785	8.98327	9.16053
742	265.8	8.74719	8.35432	8.49617	8.7221	9.00118	9.17543
741	265.9	8.75807	8.36543	8.50517	8.73636	9.01234	9.18457
740	266	8.77189	8.37775	8.51422	8.75154	9.0267	9.19453
739	266.1	8.78372	8.39807	8.52285	8.76436	9.03884	9.19696
738	266.2	8.7953	8.40602	8.5322	8.77912	9.05233	9.21502
737	266.3	8.80727	8.41604	8.54286	8.79152	9.06176	9.22848
736	266.4	8.81481	8.42295	8.54952	8.79978	9.07072	9.235
735	266.5	8.82546	8.42293	8.55184	8.81175	9.08442	9.25442
734	266.6	8.83724	8.42696	8.55853	8.82494	9.09721	9.26587
733	266.7	8.84454	8.43377	8.56864	8.83092	9.10269	9.27434
732	266.8	8.85565	8.43693	8.57455	8.84455	9.12376	9.28436
731	266.9	8.8618	8.4375	8.57939	8.85075	9.1312	9.2998
730	267	8.87114	8.44106	8.58395	8.85989	9.14669	9.31358
729	267.1	8.87679	8.43894	8.58483	8.86493	9.15917	9.32873
728	267.2	8.88374	8.4465	8.59513	8.87443	9.16407	9.33359
727	267.3	8.88942	8.44435	8.59201	8.88068	9.17822	9.34331
726	267.4	8.89706	8.45041	8.59651	8.88867	9.18847	9.35981
725	267.5	8.90151	8.44526	8.59648	8.89407	9.19794	9.37062
724	267.6	8.91095	8.45021	8.60278	8.90318	9.21128	9.38276
723	267.7	8.91333	8.44742	8.60162	8.90697	9.2165	9.38779
722	267.8	8.9195	8.44784	8.60363	8.91296	9.2276	9.39871
721	267.9	8.92592	8.44393	8.60413	8.92104	9.23896	9.41365
720	268	8.92974	8.445	8.60615	8.92222	9.24717	9.42714
719	268.1	8.93415	8.44304	8.60538	8.9283	9.25265	9.44103
718	268.2	8.93887	8.43922	8.606	8.93296	9.26154	9.45237
717	268.3	8.94459	8.43864	8.6106	8.93831	9.2693	9.4635
716	268.4	8.94734	8.44026	8.60971	8.94022	9.2735	9.4756
715	268.5	8.95128	8.43786	8.61017	8.94291	9.27891	9.48697
714	268.6	8.95804	8.44161	8.61226	8.94867	9.28922	9.49654
713	268.7	8.95749	8.4344	8.60969	8.94854	9.28744	9.50146
712	268.8	8.96595	8.4389	8.6167	8.95369	9.2987	9.51767
711	268.9	8.96533	8.43593	8.61542	8.95299	9.30101	9.52415
710	269	8.96866	8.43362	8.61573	8.95613	9.31005	9.5299
709	269.1	8.97308	8.42962	8.61489	8.96024	9.31932	9.54912
708	269.2	8.97623	8.42962	8.61607	8.96342	9.32397	9.55725
707	269.3	8.9799	8.4287	8.61877	8.96583	9.32953	9.56387
706	269.4	8.98317	8.43103	8.61869	8.96714	9.34006	9.56698
705	269.5	8.98562	8.42381	8.62015	8.97184	9.3435	9.57083
704	269.6	8.98868	8.4267	8.62157	8.97379	9.34854	9.57868
703	269.7	8.99294	8.42382	8.62312	8.97803	9.3584	9.58667
702	269.8	8.99499	8.42354	8.62355	8.97898	9.3637	9.59305
701	269.9	8.99887	8.42626	8.62742	8.98179	9.36864	9.59775
700	270	9.0039	8.42761	8.62982	8.98555	9.37261	9.60588
699	270.1	9.0054	8.42712	8.63248	8.98421	9.37709	9.61348
698	270.2	9.01014	8.42873	8.634	8.99183	9.38364	9.61897
697	270.3	9.01321	8.42493	8.63311	8.99221	9.38997	9.62634
696	270.4	9.01559	8.42397	8.63476	8.99486	9.3917	9.6302
695	270.5	9.02034	8.42376	8.63818	8.99843	9.39844	9.64048
694	270.6	9.02621	8.42849	8.64128	9.00483	9.40881	9.65127
693	270.7	9.02809	8.42797	8.64278	9.00827	9.40842	9.65037
692	270.8	9.03292	8.42943	8.64623	9.01261	9.41527	9.66022
691	270.9	9.03684	8.42873	8.64769	9.01601	9.42305	9.66519
690	271	9.04114	8.43144	8.64708	9.02134	9.42992	9.67682
689	271.1	9.04533	8.43361	8.65315	9.02782	9.43518	9.68103
688	271.2	9.04738	8.43389	8.65113	9.0306	9.43539	9.67925
687	271.3	9.05405	8.43003	8.65459	9.04066	9.44652	9.68935
686	271.4	9.05649	8.4317	8.65257	9.04401	9.44992	9.68825
685	271.5	9.06155	8.43286	8.65478	9.05005	9.45655	9.69592
684	271.6	9.06516	8.4339	8.65282	9.05774	9.46038	9.69645
683	271.7	9.0717	8.43473	8.65394	9.06637	9.46922	9.70267
682	271.8	9.07848	8.43592	8.65915	9.07546	9.47672	9.70971
681	271.9	9.08012	8.4323	8.65793	9.07981	9.47726	9.71415
680	272	9.0838	8.43382	8.66136	9.08333	9.47991	9.72194
679	272.1	9.08645	8.42923	8.65878	9.08789	9.48212	9.72863
678	272.2	9.09305	8.43203	8.66346	9.09789	9.49082	9.73491
677	272.3	9.10084	8.43391	8.66756	9.10555	9.4996	9.74403
676	272.4	9.1015	8.42639	8.66288	9.10942	9.50353	9.73893
675	272.5	9.10604	8.42477	8.66667	9.11608	9.50791	9.74508
674	272.6	9.11233	8.42917	8.6719	9.12208	9.51431	9.75455
673	272.7	9.11528	8.42697	8.67303	9.1262	9.51922	9.75773
672	272.8	9.12271	8.43025	8.68132	9.13598	9.5266	9.7617
671	272.9	9.12478	8.42579	8.6822	9.1411	9.52592	9.76294
670	273	9.12912	8.42546	8.68459	9.1449	9.53566	9.77211
669	273.1	9.13229	8.42456	8.68994	9.14803	9.53662	9.77446
668	273.2	9.13617	8.42574	8.6945	9.1506	9.5421	9.78351
667	273.3	9.14174	8.42623	8.69704	9.15855	9.54696	9.78905
666	273.4	9.14263	8.42418	8.69639	9.15965	9.54945	9.79258
665	273.5	9.14542	8.42688	8.70432	9.16144	9.54986	9.79304
664	273.6	9.14988	8.4271	8.70942	9.16576	9.55543	9.80679
663	273.7	9.15221	8.42677	8.71318	9.16867	9.55681	9.80766
662	273.8	9.15281	8.42684	8.71497	9.17112	9.55759	9.80607
661	273.9	9.15192	8.42293	8.71159	9.1694	9.55827	9.81013
660	274	9.15281	8.4259	8.71489	9.17148	9.55859	9.80991
659	274.1	9.1515	8.41887	8.7119	9.17295	9.55622	9.808
658	274.2	9.15455	8.43226	8.71614	9.17143	9.55649	9.81283
657	274.3	9.1526	8.42509	8.71134	9.17152	9.55666	9.81239
656	274.4	9.15263	8.42914	8.71402	9.17157	9.55134	9.813
655	274.5	9.15178	8.43381	8.71442	9.17157	9.54885	9.81233
654	274.6	9.14911	8.43466	8.71281	9.16643	9.54423	9.80991
653	274.7	9.14367	8.43425	8.70787	9.15981	9.53781	9.80415
652	274.8	9.13909	8.43088	8.70098	9.15421	9.53328	9.8005
651	274.9	9.13694	8.43114	8.70126	9.15164	9.52382	9.802
650	275	9.13268	8.43263	8.69276	9.14705	9.52114	9.8045
649	275.1	9.12624	8.4355	8.69144	9.14052	9.51019	9.7951
648	275.2	9.11844	8.4293	8.68143	9.13059	9.5022	9.79531
647	275.3	9.11149	8.43394	8.6819	9.12486	9.48955	9.79036
646	275.4	9.10421	8.42904	8.67366	9.11486	9.48562	9.79274
645	275.5	9.09537	8.42419	8.66757	9.10539	9.4727	9.77877
644	275.6	9.08501	8.41915	8.65864	9.09128	9.46525	9.77681
643	275.7	9.07496	8.41534	8.65057	9.08088	9.44983	9.765
642	275.8	9.0611	8.40777	8.6353	9.066	9.43792	9.74873
641	275.9	9.05027	8.40615	8.62819	9.0507	9.42248	9.7456
640	276	9.03739	8.39698	8.62022	9.03742	9.40361	9.73111
639	276.1	9.02022	8.39048	8.60947	9.01622	9.38452	9.71486
638	276.2	9.0054	8.37821	8.59438	8.99948	9.37163	9.69907
637	276.3	8.98949	8.36053	8.57954	8.98349	9.35398	9.68524
636	276.4	8.97265	8.35144	8.56452	8.96463	9.33472	9.66415
635	276.5	8.95423	8.33962	8.55199	8.94245	9.31082	9.64974
634	276.6	8.93344	8.32448	8.53596	8.91909	9.29031	9.62406
633	276.7	8.91372	8.31433	8.52326	8.89911	9.27066	9.59868
632	276.8	8.89093	8.3005	8.5057	8.87268	9.24654	9.58
631	276.9	8.86982	8.29255	8.48968	8.85073	9.21957	9.55588
630	277	8.84484	8.26981	8.46479	8.82585	9.19201	9.52759
629	277.1	8.82139	8.24884	8.44587	8.80191	9.16667	9.49537
628	277.2	8.79513	8.23228	8.42772	8.77215	9.13882	9.46667
627	277.3	8.76849	8.2155	8.40656	8.7452	9.10818	9.43066
626	277.4	8.73995	8.19802	8.381	8.71814	9.07529	9.39407
625	277.5	8.7101	8.17361	8.35479	8.68659	9.04563	9.35658
624	277.6	8.68188	8.15074	8.3308	8.65734	9.00962	9.3184
623	277.7	8.65094	8.12629	8.30696	8.62805	8.97715	9.27294
622	277.8	8.6199	8.10788	8.28171	8.59411	8.94085	9.23578
621	277.9	8.58748	8.08225	8.2495	8.5597	8.9093	9.19487
620	278	8.55415	8.05144	8.22247	8.52607	8.87257	9.15321
619	278.1	8.52159	8.0288	8.197	8.49441	8.83514	9.10386
618	278.2	8.48665	8.00627	8.16356	8.46006	8.79577	9.0679
617	278.3	8.45091	7.96562	8.13015	8.42231	8.76107	9.02543
616	278.4	8.41345	7.93674	8.09852	8.3854	8.71717	8.97252
615	278.5	8.37464	7.9084	8.06271	8.34716	8.67768	8.9235
614	278.6	8.3381	7.87	8.02788	8.31255	8.63815	8.87433
613	278.7	8.3013	7.83891	7.99649	8.27588	8.59665	8.83182
612	278.8	8.26017	7.80339	7.95846	8.23819	8.55511	8.77249
611	278.9	8.22181	7.76518	7.92057	8.19658	8.51508	8.73223
610	279	8.18051	7.72898	7.88679	8.15827	8.46784	8.67754
609	279.1	8.14052	7.69031	7.84591	8.12046	8.42783	8.63227
608	279.2	8.10085	7.6507	7.81022	8.08144	8.38317	8.58201
607	279.3	8.05738	7.6119	7.76517	8.04253	8.33776	8.53
606	279.4	8.01552	7.56498	7.72761	8.00413	8.28989	8.48039
605	279.5	7.97608	7.53221	7.68866	7.9645	8.25061	8.44012
604	279.6	7.93163	7.49109	7.6436	7.92431	8.19662	8.38568
603	279.7	7.89022	7.45	7.60623	7.88567	8.15834	8.34012
602	279.8	7.8468	7.40986	7.56038	7.84475	8.10387	8.28696
601	279.9	7.80431	7.36724	7.52122	7.80379	8.06578	8.24278
600	280	7.76102	7.32781	7.47528	7.76102	8.01976	8.19333
599	280.1	7.71796	7.28454	7.43398	7.72066	7.97357	8.1474
598	280.2	7.67444	7.24466	7.3903	7.67942	7.93098	8.09026
597	280.3	7.63072	7.20467	7.34697	7.63374	7.88231	8.05236
596	280.4	7.5875	7.15567	7.3062	7.59332	7.84242	7.99553
595	280.5	7.54385	7.11951	7.26315	7.54663	7.79373	7.95563
594	280.6	7.50205	7.07436	7.22254	7.50656	7.75669	7.90238
593	280.7	7.4578	7.03414	7.17869	7.45862	7.71064	7.86371
592	280.8	7.41511	6.99301	7.13889	7.41653	7.6697	7.81587
591	280.9	7.37446	6.94608	7.0975	7.37459	7.63114	7.77825
590	281	7.33084	6.9086	7.05195	7.32699	7.58843	7.74232
589	281.1	7.28978	6.86585	7.01729	7.28605	7.54745	7.69187
588	281.2	7.2476	6.82369	6.9726	7.24254	7.49925	7.6578
587	281.3	7.20644	6.77837	6.9299	7.19953	7.46527	7.62129
586	281.4	7.16425	6.73732	6.89167	7.15724	7.42242	7.58043
585	281.5	7.12591	6.70463	6.8492	7.11787	7.38169	7.54929
584	281.6	7.08617	6.65861	6.81072	7.07994	7.34609	7.51261
583	281.7	7.04446	6.6195	6.76925	7.03656	7.29882	7.4756
582	281.8	7.00607	6.58231	6.72803	6.99957	7.26602	7.43804
581	281.9	6.96957	6.54637	6.69704	6.9621	7.22778	7.39843
580	282	6.93063	6.50997	6.65223	6.92313	7.18598	7.37036
579	282.1	6.89206	6.46813	6.61367	6.88328	7.1524	7.33535
578	282.2	6.85676	6.43501	6.57833	6.84656	7.11597	7.29686
577	282.3	6.81938	6.40453	6.53832	6.81205	7.07627	7.26346
576	282.4	6.78472	6.36012	6.507	6.77497	7.04434	7.2291
575	282.5	6.7501	6.3258	6.46729	6.73922	7.00913	7.19614
574	282.6	6.71584	6.301	6.43109	6.70451	6.97419	7.1695
573	282.7	6.68014	6.25806	6.40075	6.66811	6.93911	7.13129
572	282.8	6.64855	6.22474	6.36357	6.63603	6.90334	7.09581
571	282.9	6.61441	6.20037	6.3296	6.60248	6.8715	7.06986
570	283	6.58277	6.16185	6.29989	6.56821	6.84	7.0404
569	283.1	6.55281	6.12922	6.26695	6.53651	6.80845	7.00956
568	283.2	6.52193	6.108	6.23764	6.50887	6.77818	6.98418
567	283.3	6.49219	6.07193	6.20709	6.47675	6.74964	6.95643
566	283.4	6.46496	6.03972	6.1783	6.4487	6.72092	6.92424
565	283.5	6.43426	6.01655	6.1514	6.42032	6.68476	6.89173
564	283.6	6.40811	6.00091	6.12439	6.39284	6.66297	6.87014
563	283.7	6.38024	5.96221	6.09787	6.36499	6.63533	6.84336
562	283.8	6.35592	5.93708	6.07243	6.34118	6.60329	6.81293
561	283.9	6.33	5.91843	6.04916	6.31741	6.57897	6.78862
560	284	6.3055	5.89597	6.02495	6.28943	6.55754	6.76928
559	284.1	6.28086	5.87002	6.00238	6.2661	6.53065	6.73883
558	284.2	6.25777	5.84444	5.97988	6.2448	6.50077	6.71116
557	284.3	6.2366	5.82785	5.96067	6.22296	6.47957	6.69396
556	284.4	6.21593	5.81138	5.9426	6.20321	6.46101	6.67071
555	284.5	6.1935	5.79463	5.92195	6.17832	6.43956	6.6495
554	284.6	6.17497	5.77358	5.9058	6.16134	6.41648	6.62452
553	284.7	6.15595	5.7538	5.8852	6.14275	6.39476	6.6
552	284.8	6.1369	5.73536	5.86819	6.12485	6.37529	6.58288
551	284.9	6.12211	5.72424	5.85545	6.11077	6.36154	6.57139
550	285	6.10373	5.71286	5.83917	6.09056	6.34145	6.55268
549	285.1	6.08973	5.70456	5.8294	6.07534	6.32378	6.53673
548	285.2	6.0731	5.68757	5.81195	6.06147	6.3057	6.51128
547	285.3	6.0607	5.67556	5.8041	6.04753	6.29124	6.49316
546	285.4	6.04706	5.65996	5.79031	6.03421	6.27961	6.48043
545	285.5	6.03569	5.65328	5.7813	6.02299	6.26705	6.46873
544	285.6	6.0253	5.64288	5.7709	6.01297	6.25682	6.4621
543	285.7	6.01522	5.63824	5.76342	6.00298	6.24423	6.44765
542	285.8	6.00594	5.63256	5.75623	5.99238	6.23542	6.43448
541	285.9	5.99831	5.62878	5.75004	5.98516	6.22601	6.41919
540	286	5.99233	5.62585	5.74611	5.97911	6.21602	6.40906
539	286.1	5.98507	5.62366	5.74189	5.97183	6.20316	6.399
538	286.2	5.97955	5.62241	5.73872	5.9662	6.19638	6.38995
537	286.3	5.97602	5.62027	5.73483	5.96267	6.19354	6.38534
536	286.4	5.97257	5.62056	5.73399	5.95869	6.18963	6.37483
535	286.5	5.97151	5.62138	5.73553	5.95643	6.18758	6.37548
534	286.6	5.97113	5.62351	5.73691	5.95609	6.18643	6.37016
533	286.7	5.97118	5.6263	5.73913	5.9566	6.1853	6.36301
532	286.8	5.97366	5.62914	5.74364	5.95737	6.18791	6.36567
531	286.9	5.9761	5.63438	5.74837	5.96134	6.18793	6.36455
530	287	5.97951	5.63946	5.75284	5.96474	6.18977	6.3644
529	287.1	5.98441	5.6473	5.76031	5.97055	6.19274	6.36253
528	287.2	5.99221	5.66063	5.77001	5.97754	6.19703	6.36732
527	287.3	5.99885	5.67212	5.77868	5.98543	6.20288	6.36864
526	287.4	6.00821	5.69308	5.79124	5.99458	6.21254	6.3749
525	287.5	6.01817	5.70649	5.80312	6.00508	6.22267	6.37914
524	287.6	6.02984	5.71516	5.81628	6.01648	6.23265	6.385
523	287.7	6.04321	5.72696	5.82992	6.02932	6.24532	6.39278
522	287.8	6.05797	5.74085	5.84743	6.04336	6.2574	6.4026
521	287.9	6.07412	5.76243	5.86547	6.05873	6.27123	6.41942
520	288	6.09168	5.79475	5.88495	6.07616	6.28611	6.43753
519	288.1	6.11056	5.81161	5.90767	6.09579	6.29986	6.45188
518	288.2	6.12978	5.82721	5.92756	6.11711	6.32022	6.46474
517	288.3	6.15218	5.84978	5.94974	6.1375	6.34316	6.4833
516	288.4	6.17593	5.88548	5.9771	6.16166	6.36491	6.49835
515	288.5	6.20128	5.91168	6.00513	6.18739	6.38539	6.52782
514	288.6	6.22832	5.93515	6.03074	6.21446	6.41112	6.55278
513	288.7	6.25765	5.96689	6.06043	6.24384	6.44345	6.57887
512	288.8	6.28739	6.00727	6.0932	6.27374	6.46935	6.59755
511	288.9	6.31839	6.03175	6.12525	6.3066	6.49484	6.63291
510	289	6.3538	6.06759	6.15732	6.33945	6.53598	6.66898
509	289.1	6.38825	6.11194	6.19889	6.37563	6.56848	6.69428
508	289.2	6.42664	6.14338	6.23569	6.41396	6.60267	6.73683
507	289.3	6.46593	6.19544	6.2737	6.45106	6.64533	6.77504
506	289.4	6.50679	6.2248	6.31828	6.49687	6.68232	6.80526
505	289.5	6.55007	6.26913	6.35757	6.53575	6.72864	6.86012
504	289.6	6.59476	6.31486	6.40817	6.5819	6.77386	6.89397
503	289.7	6.64282	6.3582	6.45198	6.62915	6.82098	6.95309
502	289.8	6.6926	6.41174	6.50788	6.67878	6.87285	6.99665
501	289.9	6.74396	6.4529	6.5509	6.73097	6.92489	7.05711
500	290	6.79766	6.51232	6.61053	6.78468	6.97835	7.10382
499	290.1	6.85342	6.55854	6.66081	6.83885	7.03723	7.16774
498	290.2	6.9111	6.61705	6.7192	6.89833	7.09244	7.22788
497	290.3	6.97011	6.67006	6.77757	6.95726	7.1572	7.28606
496	290.4	7.03572	6.7299	6.83704	7.02111	7.22517	7.36231
495	290.5	7.10053	6.80051	6.9064	7.08774	7.28862	7.42512
494	290.6	7.16606	6.85062	6.96416	7.1542	7.36056	7.49296
493	290.7	7.23317	6.91551	7.02782	7.22	7.43	7.56854
492	290.8	7.30694	6.98317	7.10507	7.29295	7.50382	7.65041
491	290.9	7.38089	7.04917	7.1717	7.36944	7.58093	7.72117
490	291	7.45706	7.11862	7.24268	7.44547	7.66337	7.79969
489	291.1	7.53524	7.19477	7.32012	7.52153	7.74826	7.88783
488	291.2	7.6173	7.26697	7.40265	7.60442	7.8337	7.97595
487	291.3	7.70302	7.34241	7.48255	7.6899	7.92097	8.06772
486	291.4	7.78841	7.42292	7.55942	7.77661	8.01147	8.15829
485	291.5	7.87661	7.50757	7.6447	7.86497	8.09925	8.25019
484	291.6	7.96782	7.58638	7.73118	7.95639	8.19725	8.3501
483	291.7	8.06201	7.67179	7.82303	8.05047	8.29619	8.44875
482	291.8	8.1584	7.75839	7.91598	8.14796	8.39678	8.54903
481	291.9	8.25903	7.84943	8.01254	8.24881	8.50319	8.65636
480	292	8.35807	7.94115	8.10798	8.3481	8.60861	8.76223
479	292.1	8.46325	8.03829	8.20846	8.45509	8.7191	8.87035
478	292.2	8.56622	8.13423	8.30762	8.55947	8.82716	8.97709
477	292.3	8.67624	8.23579	8.41287	8.6681	8.94296	9.09436
476	292.4	8.78669	8.33753	8.51734	8.77921	9.05882	9.20678
475	292.5	8.8995	8.44271	8.6249	8.89318	9.17252	9.32981
474	292.6	9.01342	8.55041	8.73417	9.00958	9.28622	9.44902
473	292.7	9.13168	8.66283	8.84788	9.12642	9.40824	9.57074
472	292.8	9.25101	8.77826	8.96402	9.24679	9.53379	9.69047
471	292.9	9.37112	8.89394	9.0815	9.36677	9.65753	9.81574
470	293	9.49742	9.01088	9.20534	9.49763	9.78395	9.95011
469	293.1	9.62042	9.12789	9.3241	9.62041	9.90621	10.0721
468	293.2	9.74851	9.24697	9.44723	9.74726	10.0402	10.2049
467	293.3	9.87788	9.37559	9.57577	9.87804	10.171	10.342
466	293.4	10.0094	9.50779	9.70569	10.0086	10.3008	10.4742
465	293.5	10.1389	9.62648	9.83157	10.1419	10.4343	10.599
464	293.6	10.2753	9.75531	9.96382	10.2753	10.5748	10.7479
463	293.7	10.4078	9.89511	10.1008	10.4087	10.7012	10.8798
462	293.8	10.5449	10.0258	10.2331	10.5472	10.8459	11.017
461	293.9	10.6801	10.1594	10.3656	10.6824	10.9789	11.1561
460	294	10.8174	10.2969	10.5072	10.819	11.12	11.2909
459	294.1	10.9535	10.4322	10.6417	10.9575	11.2544	11.4244
458	294.2	11.0937	10.5705	10.7825	11.0947	11.3941	11.57
457	294.3	11.2353	10.7136	10.9254	11.2393	11.5347	11.7048
456	294.4	11.3741	10.8531	11.0632	11.3753	11.6762	11.8522
455	294.5	11.5144	10.9962	11.2084	11.5191	11.8157	11.9854
454	294.6	11.6515	11.1295	11.343	11.6526	11.9532	12.1282
453	294.7	11.7891	11.2723	11.486	11.7902	12.0874	12.2653
452	294.8	11.9272	11.4104	11.6234	11.9289	12.2289	12.3986
451	294.9	12.0667	11.5468	11.7643	12.067	12.3667	12.5445
450	295	12.2009	11.6933	11.9063	12.2017	12.497	12.6731
449	295.1	12.3388	11.8264	12.0415	12.338	12.6355	12.8113
448	295.2	12.4699	11.9604	12.1773	12.4674	12.7676	12.9436
447	295.3	12.6031	12.0991	12.3126	12.6011	12.8982	13.0749
446	295.4	12.7347	12.2237	12.4393	12.7303	13.0331	13.207
445	295.5	12.8656	12.3631	12.5728	12.8591	13.1609	13.3395
444	295.6	12.9938	12.4974	12.7016	12.9862	13.2884	13.4721
443	295.7	13.1157	12.6175	12.823	13.1059	13.4087	13.5892
442	295.8	13.2391	12.7395	12.9437	13.2319	13.5326	13.7134
441	295.9	13.3605	12.8658	13.0647	13.3524	13.6537	13.8387
440	296	13.4807	12.986	13.184	13.4733	13.7738	13.961
439	296.1	13.5949	13.1044	13.2972	13.5846	13.8878	14.076
438	296.2	13.7087	13.2143	13.407	13.6991	13.9981	14.1884
437	296.3	13.8165	13.3187	13.513	13.8075	14.108	14.2959
436	296.4	13.9228	13.4246	13.6172	13.9167	14.2164	14.3996
435	296.5	14.0259	13.5247	13.7139	14.0218	14.3245	14.5081
434	296.6	14.1252	13.6164	13.8106	14.1232	14.4268	14.6119
433	296.7	14.2199	13.71	13.9019	14.217	14.5227	14.7092
432	296.8	14.3159	13.8015	13.9932	14.3149	14.6215	14.8073
431	296.9	14.4051	13.8897	14.0828	14.402	14.706	14.8983
430	297	14.4909	13.9647	14.1592	14.4924	14.794	14.9902
429	297.1	14.5731	14.0464	14.2401	14.5749	14.8823	15.0792
428	297.2	14.6512	14.1219	14.3168	14.6556	14.9623	15.1582
427	297.3	14.7264	14.1969	14.3911	14.7315	15.0406	15.2369
426	297.4	14.7947	14.2532	14.4534	14.8018	15.1019	15.3012
425	297.5	14.8629	14.3166	14.5193	14.8701	15.1755	15.378
424	297.6	14.9253	14.3773	14.5776	14.9336	15.2412	15.4446
423	297.7	14.9853	14.4281	14.6374	14.9969	15.2956	15.4966
422	297.8	15.0387	14.4774	14.685	15.0485	15.3596	15.5683
421	297.9	15.0908	14.5265	14.7376	15.1039	15.4041	15.6141
420	298	15.1407	14.5685	14.7846	15.1532	15.4645	15.6711
419	298.1	15.1828	14.6084	14.8296	15.1953	15.5003	15.7111
418	298.2	15.2241	14.6435	14.8654	15.2373	15.5484	15.7595
417	298.3	15.2612	14.6801	14.9007	15.2763	15.5858	15.7943
416	298.4	15.294	14.7103	14.9311	15.3067	15.6233	15.833
415	298.5	15.3248	14.733	14.9628	15.3393	15.6529	15.8628
414	298.6	15.3527	14.7548	14.9894	15.3671	15.6825	15.8902
413	298.7	15.3739	14.7749	15.0133	15.3868	15.7007	15.9172
412	298.8	15.3925	14.7978	15.0292	15.4062	15.724	15.9377
411	298.9	15.411	14.8137	15.0478	15.4259	15.7463	15.9584
410	299	15.4232	14.8173	15.0624	15.4389	15.759	15.9703
409	299.1	15.4353	14.8271	15.0718	15.4506	15.7724	15.9838
408	299.2	15.4423	14.834	15.0827	15.457	15.7792	15.9892
407	299.3	15.4476	14.8348	15.0876	15.4639	15.7848	15.9981
406	299.4	15.4516	14.8396	15.0934	15.4691	15.7894	15.9957
405	299.5	15.4496	14.8419	15.0867	15.468	15.7856	15.9984
404	299.6	15.4489	14.8341	15.0864	15.4687	15.7875	16.0008
403	299.7	15.4436	14.8308	15.081	15.4624	15.7834	15.9992
402	299.8	15.4383	14.8284	15.0737	15.4604	15.7771	15.9914
401	299.9	15.4293	14.8178	15.0627	15.4499	15.7689	15.9824
400	300	15.416	14.8094	15.0494	15.4377	15.755	15.9689
399	300.1	15.4053	14.8019	15.0377	15.4259	15.7464	15.9621
398	300.2	15.3916	14.7883	15.0247	15.4118	15.7322	15.9473
397	300.3	15.3767	14.7688	15.0135	15.3941	15.714	15.932
396	300.4	15.3613	14.7464	14.9953	15.3792	15.7009	15.9167
395	300.5	15.3416	14.7349	14.9714	15.3597	15.6827	15.8946
394	300.6	15.3226	14.7158	14.951	15.3375	15.6675	15.8839
393	300.7	15.2994	14.7005	14.9276	15.3119	15.6435	15.8616
392	300.8	15.2767	14.6693	14.9084	15.2868	15.6188	15.8436
391	300.9	15.2573	14.6503	14.8875	15.2661	15.5983	15.8252
390	301	15.2328	14.6225	14.86	15.2402	15.5806	15.8005
389	301.1	15.2098	14.6041	14.8383	15.217	15.5582	15.7845
388	301.2	15.1827	14.5767	14.815	15.1844	15.5328	15.7646
387	301.3	15.1578	14.5489	14.7911	15.156	15.5041	15.743
386	301.4	15.1341	14.5235	14.766	15.1327	15.4836	15.7203
385	301.5	15.1086	14.5032	14.744	15.1035	15.4593	15.6966
384	301.6	15.0828	14.4752	14.7195	15.0753	15.4314	15.6814
383	301.7	15.0584	14.4415	14.701	15.0503	15.4041	15.6643
382	301.8	15.0275	14.414	14.6697	15.0163	15.3761	15.637
381	301.9	15.0028	14.3867	14.6475	14.9917	15.3538	15.6088
380	302	14.9777	14.3648	14.6231	14.9653	15.324	15.5873
379	302.1	14.9524	14.3421	14.602	14.9378	15.2963	15.5667
378	302.2	14.9268	14.313	14.5787	14.9126	15.2747	15.5391
377	302.3	14.8982	14.2839	14.5484	14.8822	15.2458	15.5129
376	302.4	14.8763	14.2621	14.5262	14.8595	15.2211	15.4983
375	302.5	14.8506	14.2404	14.5058	14.8336	15.1936	15.4688
374	302.6	14.8257	14.2184	14.4767	14.8077	15.1719	15.4481
373	302.7	14.8004	14.1884	14.4507	14.7839	15.1462	15.428
372	302.8	14.7781	14.1721	14.4304	14.7619	15.12	15.3944
371	302.9	14.7538	14.1498	14.4037	14.7363	15.0947	15.3808
370	303	14.7314	14.129	14.3757	14.7154	15.0749	15.3567
369	303.1	14.71	14.1146	14.3567	14.6924	15.0511	15.3349
368	303.2	14.6863	14.0903	14.3294	14.6702	15.0272	15.3139
367	303.3	14.6668	14.0729	14.3088	14.6514	15.005	15.2932
366	303.4	14.6454	14.0517	14.2863	14.631	14.9824	15.2747
365	303.5	14.6253	14.0378	14.2654	14.6088	14.9631	15.2567
364	303.6	14.6076	14.0204	14.2446	14.5933	14.9447	15.2375
363	303.7	14.588	14.0011	14.2255	14.5746	14.9248	15.2202
362	303.8	14.5694	13.9829	14.208	14.5545	14.9051	15.1979
361	303.9	14.5511	13.9666	14.1883	14.5371	14.8865	15.1778
360	304	14.537	13.9522	14.1708	14.5217	14.8737	15.1622
359	304.1	14.5196	13.934	14.1543	14.5031	14.8573	15.1507
358	304.2	14.5076	13.9216	14.1362	14.4917	14.8503	15.1399
357	304.3	14.4914	13.9117	14.1204	14.4733	14.8322	15.112
356	304.4	14.4771	13.8968	14.1054	14.4596	14.821	15.0992
355	304.5	14.4646	13.8779	14.0908	14.4464	14.8074	15.0911
354	304.6	14.4525	13.869	14.0831	14.4353	14.7956	15.0741
353	304.7	14.4407	13.8554	14.0682	14.4237	14.788	15.063
352	304.8	14.4293	13.8417	14.0553	14.411	14.7798	15.0534
351	304.9	14.4208	13.8334	14.0463	14.4005	14.7719	15.0498
350	305	14.4079	13.8227	14.033	14.3877	14.7584	15.0346
349	305.1	14.4017	13.8157	14.0272	14.3805	14.7555	15.0326
348	305.2	14.3908	13.8058	14.0162	14.3685	14.7445	15.0233
347	305.3	14.3853	13.8022	14.0134	14.3632	14.7401	15.0108
346	305.4	14.3777	13.7879	14.0085	14.356	14.7329	15.0006
345	305.5	14.3728	13.7819	14.0044	14.3501	14.7321	15.0017
344	305.6	14.3661	13.774	13.9985	14.3426	14.7258	14.9976
343	305.7	14.3602	13.7656	13.9911	14.338	14.7208	14.9963
342	305.8	14.3569	13.7601	13.9847	14.333	14.7199	14.9982
341	305.9	14.3515	13.7547	13.9779	14.3282	14.7149	14.9961
340	306	14.35	13.7507	13.977	14.3263	14.715	14.9975
339	306.1	14.3465	13.7485	13.9747	14.3238	14.708	14.9921
338	306.2	14.3445	13.7435	13.9725	14.32	14.7073	14.9983
337	306.3	14.3425	13.7423	13.9667	14.32	14.7085	14.9932
336	306.4	14.3393	13.7387	13.9638	14.3162	14.7059	14.995
335	306.5	14.3383	13.7402	13.9617	14.3171	14.7054	14.9932
334	306.6	14.3401	13.745	13.9664	14.3172	14.703	14.9923
333	306.7	14.338	13.7384	13.9642	14.3176	14.7005	14.9921
332	306.8	14.3409	13.7387	13.9633	14.3209	14.7034	14.9979
331	306.9	14.3414	13.7411	13.9647	14.3213	14.7045	14.9957
330	307	14.3438	13.7431	13.9663	14.3239	14.7064	15.0017
329	307.1	14.3452	13.7383	13.9686	14.3261	14.7082	15.0011
328	307.2	14.3486	13.7445	13.9741	14.3304	14.7097	15.0054
327	307.3	14.3506	13.746	13.9755	14.3324	14.7114	15.0023
326	307.4	14.3554	13.749	13.9807	14.3378	14.7149	15.008
325	307.5	14.3587	13.7548	13.9834	14.3418	14.718	15.0063
324	307.6	14.3589	13.7519	13.9871	14.3442	14.7188	15.003
323	307.7	14.3659	13.7592	13.9957	14.3512	14.7257	15.0067
322	307.8	14.3702	13.7682	14.0037	14.3546	14.7276	15.0096
321	307.9	14.3755	13.7717	14.0083	14.3602	14.7366	15.016
320	308	14.3799	13.7792	14.0145	14.3652	14.7389	15.0189
319	308.1	14.3875	13.789	14.0234	14.3728	14.7479	15.0266
318	308.2	14.3928	13.7991	14.0291	14.3773	14.752	15.0298
317	308.3	14.3985	13.8027	14.0371	14.3824	14.7569	15.0328
316	308.4	14.4051	13.8111	14.0426	14.3889	14.7618	15.0366
315	308.5	14.4098	13.8133	14.0495	14.3923	14.7669	15.04
314	308.6	14.4183	13.8197	14.0606	14.4014	14.7749	15.0498
313	308.7	14.4231	13.8263	14.071	14.4041	14.7765	15.0483
312	308.8	14.4332	13.8373	14.0836	14.4133	14.7871	15.0555
311	308.9	14.4387	13.844	14.0889	14.4194	14.789	15.0587
310	309	14.4487	13.857	14.1024	14.4288	14.7947	15.0643
309	309.1	14.4557	13.8703	14.1089	14.4343	14.8002	15.0647
308	309.2	14.4628	13.8802	14.1155	14.4406	14.8133	15.0661
307	309.3	14.4722	13.9	14.1264	14.4502	14.8188	15.0723
306	309.4	14.4811	13.9072	14.1352	14.4586	14.8307	15.0789
305	309.5	14.489	13.9184	14.1438	14.4659	14.838	15.0857
304	309.6	14.4982	13.9281	14.1524	14.4764	14.8474	15.0879
303	309.7	14.5064	13.9429	14.1676	14.4858	14.8515	15.0888
302	309.8	14.5151	13.9519	14.1753	14.4937	14.8599	15.0924
301	309.9	14.5242	13.964	14.1871	14.5017	14.8686	15.1072
300	310	14.5348	13.9839	14.2017	14.5113	14.8789	15.114
299	310.1	14.5427	13.9989	14.2076	14.5202	14.8856	15.1154
298	310.2	14.5534	14.0114	14.2169	14.5288	14.8935	15.133
297	310.3	14.5621	14.0235	14.2279	14.5374	14.9007	15.136
296	310.4	14.5711	14.0351	14.2337	14.547	14.9117	15.1442
295	310.5	14.5818	14.0495	14.2451	14.5562	14.9236	15.1509
294	310.6	14.5899	14.0612	14.2547	14.5641	14.9296	15.1515
293	310.7	14.5985	14.0765	14.2621	14.5705	14.941	15.1633
292	310.8	14.6092	14.0933	14.2728	14.5804	14.9507	15.1721
291	310.9	14.6179	14.1081	14.2832	14.5894	14.9584	15.1762
290	311	14.6283	14.1174	14.2918	14.6004	14.9703	15.1887
289	311.1	14.6389	14.1286	14.3024	14.6124	14.9781	15.1944
288	311.2	14.6473	14.1372	14.3063	14.6186	14.9872	15.2032
287	311.3	14.6571	14.1436	14.3143	14.6278	14.9989	15.2163
286	311.4	14.6656	14.1508	14.3203	14.6364	15.0102	15.2301
285	311.5	14.6753	14.1631	14.3301	14.648	15.0208	15.2396
284	311.6	14.6828	14.1706	14.3353	14.6549	15.0338	15.2542
283	311.7	14.694	14.1754	14.3443	14.6655	15.0467	15.2713
282	311.8	14.7038	14.1928	14.3539	14.6756	15.0554	15.2823
281	311.9	14.7124	14.1955	14.3593	14.6825	15.0679	15.2967
280	312	14.7197	14.1986	14.3625	14.6886	15.0785	15.3155
279	312.1	14.7278	14.2015	14.3692	14.6964	15.0874	15.328
278	312.2	14.7369	14.2073	14.3783	14.7059	15.096	15.3395
277	312.3	14.7439	14.2087	14.3815	14.7119	15.1089	15.3544
276	312.4	14.7531	14.2107	14.387	14.7241	15.1238	15.3726
275	312.5	14.7605	14.2133	14.3911	14.7335	15.1346	15.3791
274	312.6	14.7673	14.2123	14.3937	14.7387	15.1474	15.3952
273	312.7	14.7766	14.2138	14.3986	14.7503	15.1622	15.4158
272	312.8	14.78	14.21	14.3951	14.7545	15.1703	15.4296
271	312.9	14.7864	14.2124	14.3993	14.762	15.1793	15.4413
270	313	14.7942	14.2107	14.4014	14.7719	15.1901	15.4523
269	313.1	14.8004	14.2111	14.4	14.7811	15.1983	15.4693
268	313.2	14.8054	14.2041	14.3992	14.7898	15.211	15.4758
267	313.3	14.8114	14.2038	14.4012	14.7976	15.2204	15.4899
266	313.4	14.8159	14.1949	14.4	14.8046	15.2295	15.5026
265	313.5	14.8226	14.1923	14.3986	14.8126	15.2381	15.5169
264	313.6	14.8255	14.1882	14.3949	14.8146	15.2456	15.5298
263	313.7	14.8296	14.1764	14.3927	14.8223	15.2517	15.5445
262	313.8	14.8341	14.1723	14.3932	14.8248	15.2623	15.5596
261	313.9	14.8375	14.1687	14.3932	14.8282	15.2681	15.5698
260	314	14.8396	14.1603	14.3884	14.8316	15.2726	15.5736
259	314.1	14.8416	14.1545	14.3849	14.8342	15.2784	15.5827
258	314.2	14.8438	14.1478	14.3833	14.8377	15.2837	15.5889
257	314.3	14.8463	14.139	14.3782	14.8426	15.2909	15.5973
256	314.4	14.8486	14.1307	14.3778	14.8449	15.2938	15.6082
255	314.5	14.848	14.1227	14.3711	14.8452	15.2995	15.6193
254	314.6	14.8475	14.1118	14.3641	14.8453	15.3007	15.6229
253	314.7	14.849	14.1081	14.3619	14.8484	15.306	15.6306
252	314.8	14.8462	14.0958	14.3555	14.8444	15.3055	15.6361
251	314.9	14.8455	14.0894	14.3527	14.8439	15.3104	15.639
250	315	14.8435	14.0774	14.3462	14.8431	15.3115	15.6443
249	315.1	14.84	14.0682	14.3399	14.8403	15.3089	15.6404
248	315.2	14.8393	14.0605	14.3372	14.8397	15.3107	15.6517
247	315.3	14.8348	14.0495	14.3315	14.8371	15.3083	15.6525
246	315.4	14.8337	14.0388	14.3272	14.8375	15.3103	15.6566
245	315.5	14.8283	14.0263	14.3211	14.8325	15.3054	15.6574
244	315.6	14.8245	14.0179	14.3161	14.8312	15.306	15.6565
243	315.7	14.8175	14.0029	14.3092	14.8253	15.3014	15.6563
242	315.8	14.8117	13.9913	14.3029	14.819	15.2949	15.6572
241	315.9	14.8062	13.981	14.2956	14.8141	15.2904	15.6562
240	316	14.7991	13.9591	14.2851	14.8063	15.2894	15.6575
239	316.1	14.7921	13.9513	14.2795	14.8011	15.2822	15.6522
238	316.2	14.784	13.9433	14.268	14.7903	15.2769	15.6519
237	316.3	14.7779	13.9289	14.2601	14.7867	15.2751	15.6472
236	316.4	14.7664	13.9204	14.2469	14.7741	15.2667	15.6364
235	316.5	14.7575	13.9035	14.2392	14.7669	15.2573	15.6299
234	316.6	14.7499	13.8912	14.2274	14.7596	15.2534	15.6256
233	316.7	14.7388	13.8777	14.2166	14.7473	15.2417	15.6145
232	316.8	14.7254	13.8628	14.2041	14.735	15.229	15.597
231	316.9	14.7159	13.8444	14.1927	14.7246	15.2228	15.5867
230	317	14.704	13.8268	14.1766	14.7131	15.2098	15.5815
229	317.1	14.6908	13.8136	14.1627	14.7005	15.1969	15.5703
228	317.2	14.6788	13.8079	14.1511	14.6877	15.1861	15.5511
227	317.3	14.6666	13.7906	14.14	14.6765	15.1746	15.5393
226	317.4	14.6522	13.7719	14.1278	14.6616	15.1616	15.5286
225	317.5	14.6376	13.7553	14.1109	14.6458	15.1462	15.5081
224	317.6	14.625	13.736	14.0973	14.6338	15.1351	15.4904
223	317.7	14.6098	13.7166	14.0815	14.6203	15.1152	15.4788
222	317.8	14.5936	13.7032	14.0666	14.6055	15.1002	15.4632
221	317.9	14.5773	13.6864	14.0489	14.5862	15.0844	15.4438
220	318	14.5606	13.6701	14.0334	14.5706	15.0709	15.4279
219	318.1	14.5431	13.6445	14.0191	14.5522	15.0555	15.4053
218	318.2	14.5271	13.6255	14.0025	14.5376	15.0393	15.3876
217	318.3	14.5072	13.607	13.9819	14.5168	15.0195	15.3647
216	318.4	14.4931	13.5929	13.9643	14.5027	15.0045	15.3429
215	318.5	14.4734	13.5737	13.9444	14.4854	14.9869	15.3145
214	318.6	14.4569	13.5541	13.9296	14.4661	14.9723	15.2974
213	318.7	14.4354	13.5329	13.9118	14.4434	14.9561	15.2795
212	318.8	14.42	13.5191	13.896	14.4246	14.9427	15.2636
211	318.9	14.3986	13.4966	13.8669	14.4046	14.9258	15.2476
210	319	14.3792	13.4779	13.8476	14.3829	14.9071	15.2293
209	319.1	14.3593	13.4583	13.8305	14.3615	14.887	15.2152
208	319.2	14.3399	13.4381	13.8109	14.3414	14.8699	15.1942
207	319.3	14.3191	13.4181	13.7836	14.3198	14.8488	15.1802
206	319.4	14.299	13.4069	13.7634	14.2987	14.8318	15.1695
205	319.5	14.2797	13.3878	13.7406	14.2774	14.8101	15.157
204	319.6	14.2583	13.3656	13.7213	14.2558	14.7893	15.1421
203	319.7	14.2373	13.3448	13.7014	14.2326	14.7733	15.1317
202	319.8	14.219	13.3282	13.6777	14.2089	14.7571	15.1194
201	319.9	14.1973	13.3031	13.6534	14.1843	14.7423	15.1082
200	320	14.1777	13.2885	13.6345	14.1622	14.7223	15.0933
199	320.1	14.1545	13.2706	13.6087	14.1361	14.6973	15.081
198	320.2	14.135	13.2489	13.5887	14.1129	14.6869	15.0652
197	320.3	14.1135	13.2297	13.5662	14.0883	14.6704	15.0477
196	320.4	14.0912	13.2045	13.5346	14.0642	14.6558	15.0321
195	320.5	14.0727	13.1906	13.5162	14.0427	14.6437	15.0179
194	320.6	14.0496	13.1638	13.4933	14.0153	14.6289	15.0013
193	320.7	14.0302	13.1407	13.4699	13.9964	14.6114	14.9852
192	320.8	14.0095	13.1183	13.4429	13.9716	14.5978	14.9789
191	320.9	13.9906	13.0967	13.4224	13.9473	14.5898	14.9677
190	321	13.9703	13.0689	13.4013	13.9271	14.5751	14.9544
189	321.1	13.9502	13.0483	13.374	13.9018	14.5605	14.9388
188	321.2	13.9309	13.0239	13.3488	13.8796	14.5497	14.927
187	321.3	13.9083	12.9933	13.324	13.8563	14.5325	14.918
186	321.4	13.8928	12.9753	13.3058	13.8365	14.5193	14.9091
185	321.5	13.8735	12.954	13.2804	13.8135	14.5044	14.9021
184	321.6	13.8522	12.925	13.2496	13.7904	14.4894	14.8892
183	321.7	13.8339	12.9047	13.2275	13.7714	14.476	14.8801
182	321.8	13.8162	12.878	13.2034	13.7515	14.4651	14.8736
181	321.9	13.7988	12.8503	13.1776	13.7308	14.4499	14.8689
180	322	13.7812	12.8243	13.1498	13.7127	14.4398	14.8652
179	322.1	13.763	12.7989	13.1253	13.6946	14.423	14.8536
178	322.2	13.7476	12.7774	13.1057	13.6774	14.4044	14.8515
177	322.3	13.7311	12.7488	13.0809	13.6605	14.3945	14.8457
176	322.4	13.7159	12.7298	13.0593	13.6458	14.3791	14.838
175	322.5	13.7016	12.7036	13.0348	13.6324	14.3684	14.836
174	322.6	13.6841	12.6813	13.0139	13.6144	14.352	14.8301
173	322.7	13.6711	12.6573	12.9956	13.6023	14.3463	14.8277
172	322.8	13.6561	12.6314	12.9732	13.5873	14.3343	14.8241
171	322.9	13.6435	12.609	12.9516	13.5746	14.3258	14.8276
170	323	13.6318	12.5942	12.936	13.5655	14.3141	14.8326
169	323.1	13.6175	12.5624	12.9144	13.5523	14.2983	14.8241
168	323.2	13.6071	12.5388	12.9002	13.5443	14.2928	14.8269
167	323.3	13.5962	12.5253	12.8823	13.5307	14.2853	14.8339
166	323.4	13.5852	12.5	12.8614	13.5231	14.277	14.8343
165	323.5	13.5779	12.483	12.8535	13.5168	14.2716	14.84
164	323.6	13.5661	12.4559	12.8352	13.5089	14.259	14.8337
163	323.7	13.5584	12.4413	12.8226	13.4987	14.254	14.842
162	323.8	13.5497	12.4272	12.8105	13.4946	14.2467	14.843
161	323.9	13.542	12.4117	12.7985	13.4856	14.2409	14.8439
160	324	13.5353	12.3889	12.786	13.4847	14.2354	14.8467
159	324.1	13.529	12.3814	12.7735	13.4751	14.2321	14.8495
158	324.2	13.5251	12.3637	12.7671	13.4733	14.2281	14.8556
157	324.3	13.5209	12.3555	12.7613	13.4704	14.2215	14.8568
156	324.4	13.5166	12.3406	12.7529	13.466	14.217	14.8677
155	324.5	13.5105	12.3288	12.7456	13.4609	14.2122	14.8687
154	324.6	13.5097	12.3114	12.7401	13.4627	14.2086	14.8771
153	324.7	13.5075	12.3047	12.7361	13.459	14.2053	14.8849
152	324.8	13.5066	12.2954	12.7278	13.4595	14.2076	14.901
151	324.9	13.5058	12.2818	12.7292	13.4608	14.2028	14.8946
150	325	13.508	12.2813	12.7304	13.4631	14.2044	14.908
149	325.1	13.5059	12.27	12.7261	13.463	14.2053	14.9033
148	325.2	13.5093	12.266	12.7302	13.4681	14.21	14.9053
147	325.3	13.5099	12.2633	12.7283	13.4685	14.2106	14.9163
146	325.4	13.515	12.2613	12.7331	13.4746	14.2168	14.9195
145	325.5	13.5168	12.2575	12.7362	13.4769	14.2224	14.9169
144	325.6	13.5248	12.258	12.7422	13.4859	14.2304	14.9383
143	325.7	13.5266	12.2601	12.7475	13.4871	14.2336	14.9329
142	325.8	13.5317	12.265	12.7527	13.4908	14.2389	14.9358
141	325.9	13.5384	12.2679	12.7619	13.4973	14.2453	14.9477
140	326	13.5454	12.2717	12.7691	13.5103	14.2491	14.9395
139	326.1	13.5539	12.2752	12.78	13.5195	14.2557	14.9477
138	326.2	13.5643	12.2905	12.7946	13.5326	14.2638	14.957
137	326.3	13.5729	12.3007	12.8044	13.5437	14.2662	14.9529
136	326.4	13.5817	12.3055	12.8154	13.5532	14.2733	14.9598
135	326.5	13.5949	12.3229	12.8298	13.5698	14.2862	14.96
134	326.6	13.6032	12.327	12.843	13.5788	14.2941	14.9659
133	326.7	13.6178	12.347	12.8631	13.5942	14.3057	14.9719
132	326.8	13.6305	12.3595	12.8799	13.6115	14.3181	14.9765
131	326.9	13.6408	12.3757	12.8945	13.6215	14.3292	14.976
130	327	13.6581	12.3924	12.9138	13.6436	14.3438	14.9838
129	327.1	13.6715	12.4102	12.9304	13.6613	14.354	14.9813
128	327.2	13.6886	12.4272	12.954	13.6797	14.3671	14.9876
127	327.3	13.7038	12.4458	12.9699	13.6941	14.3843	14.9935
126	327.4	13.7231	12.473	12.9977	13.7182	14.3992	15.0042
125	327.5	13.7369	12.4931	13.0142	13.7352	14.407	15.0061
124	327.6	13.755	12.5118	13.0345	13.755	14.4222	15.012
123	327.7	13.7741	12.5435	13.0627	13.7723	14.4364	15.0224
122	327.8	13.7941	12.5709	13.0839	13.7968	14.4522	15.0317
121	327.9	13.8142	12.6079	13.1093	13.8168	14.467	15.0356
120	328	13.8341	12.6274	13.1364	13.8417	14.4797	15.0421
119	328.1	13.8555	12.6575	13.1643	13.8641	14.4955	15.05
118	328.2	13.8757	12.6951	13.1909	13.8878	14.5097	15.0541
117	328.3	13.8988	12.7355	13.2208	13.9137	14.5214	15.0681
116	328.4	13.9247	12.7734	13.2526	13.9411	14.5432	15.0797
115	328.5	13.9473	12.8166	13.2809	13.9678	14.5596	15.0824
114	328.6	13.9721	12.8496	13.3114	13.9964	14.5763	15.0973
113	328.7	13.9955	12.8973	13.3407	14.0208	14.5898	15.102
112	328.8	14.021	12.942	13.3756	14.0472	14.6059	15.1146
111	328.9	14.0477	12.9925	13.406	14.077	14.6297	15.1249
110	329	14.0754	13.0319	13.4395	14.1079	14.6477	15.1309
109	329.1	14.1041	13.0844	13.4769	14.1372	14.667	15.1355
108	329.2	14.1322	13.1226	13.5131	14.1688	14.6892	15.1425
107	329.3	14.1615	13.1825	13.5501	14.1975	14.7066	15.1671
106	329.4	14.1898	13.2291	13.5842	14.2253	14.7299	15.1715
105	329.5	14.2197	13.2795	13.6264	14.2549	14.7532	15.1814
104	329.6	14.2503	13.3335	13.6673	14.2859	14.7744	15.1887
103	329.7	14.2841	13.3872	13.7126	14.3207	14.7969	15.1995
102	329.8	14.3144	13.4374	13.7538	14.346	14.8229	15.2054
101	329.9	14.3498	13.5008	13.8012	14.384	14.8484	15.2241
100	330	14.3835	13.5463	13.846	14.4154	14.8739	15.233
99	330.1	14.4165	13.6052	13.8933	14.4477	14.8996	15.2546
98	330.2	14.4519	13.6535	13.9343	14.4804	14.9272	15.2737
97	330.3	14.4881	13.7155	13.9881	14.5163	14.9568	15.2929
96	330.4	14.5221	13.7643	14.0309	14.5469	14.9814	15.3085
95	330.5	14.5622	13.8236	14.0848	14.5868	15.0098	15.3384
94	330.6	14.5995	13.8761	14.1352	14.6176	15.0406	15.3618
93	330.7	14.6368	13.9239	14.1815	14.6553	15.0679	15.3785
92	330.8	14.6777	13.9835	14.2335	14.6946	15.0964	15.401
91	330.9	14.7197	14.0372	14.2883	14.7288	15.1356	15.4296
90	331	14.7597	14.0879	14.3366	14.7686	15.1678	15.4542
89	331.1	14.8033	14.1406	14.392	14.8119	15.1995	15.4837
88	331.2	14.8433	14.1959	14.4452	14.8472	15.2344	15.5051
87	331.3	14.8889	14.2494	14.502	14.8919	15.2695	15.5521
86	331.4	14.9328	14.3086	14.5517	14.9355	15.3007	15.5868
85	331.5	14.9759	14.3612	14.6023	14.974	15.3396	15.627
84	331.6	15.0233	14.4196	14.6553	15.0231	15.3779	15.6667
83	331.7	15.0718	14.4817	14.7121	15.0728	15.4162	15.7073
82	331.8	15.1193	14.5318	14.7614	15.1176	15.4628	15.7563
81	331.9	15.1675	14.597	14.8179	15.1641	15.5038	15.8027
80	332	15.2188	14.6411	14.8707	15.2137	15.557	15.8489
79	332.1	15.2696	14.7029	14.9259	15.2618	15.6018	15.8956
78	332.2	15.3226	14.7442	14.9825	15.3131	15.6646	15.9552
77	332.3	15.3752	14.8015	15.0366	15.3628	15.7205	16.0008
76	332.4	15.4271	14.8474	15.0905	15.4125	15.7788	16.0586
75	332.5	15.4819	14.9015	15.1431	15.4648	15.8397	16.1105
74	332.6	15.5383	14.9406	15.2012	15.5172	15.9017	16.1711
73	332.7	15.5918	14.9832	15.2443	15.5684	15.9626	16.2287
72	332.8	15.6486	15.0318	15.2993	15.6262	16.0233	16.285
71	332.9	15.7095	15.0834	15.3471	15.6815	16.0968	16.368
70	333	15.7667	15.1362	15.399	15.7383	16.1594	16.4424
69	333.1	15.8251	15.1886	15.4451	15.7958	16.2211	16.5211
68	333.2	15.8907	15.2414	15.5033	15.8609	16.2935	16.6166
67	333.3	15.9531	15.2953	15.5482	15.9245	16.3678	16.7034
66	333.4	16.0168	15.3423	15.6062	15.9897	16.4361	16.7828
65	333.5	16.079	15.3985	15.6472	16.0517	16.5086	16.8693
64	333.6	16.1477	15.4427	15.7059	16.1217	16.5855	16.966
63	333.7	16.2138	15.5048	15.7525	16.1893	16.6661	17.0399
62	333.8	16.2808	15.5489	15.8076	16.2539	16.745	17.1275
61	333.9	16.349	15.602	15.861	16.3236	16.8199	17.2206
60	334	16.4153	15.6449	15.9101	16.3914	16.8953	17.3138
59	334.1	16.4858	15.7027	15.9623	16.4598	16.9808	17.413
58	334.2	16.5588	15.7532	16.0209	16.5285	17.0676	17.5139
57	334.3	16.6309	15.8071	16.0736	16.6017	17.1539	17.619
56	334.4	16.706	15.8546	16.1333	16.6746	17.2412	17.724
55	334.5	16.779	15.9113	16.1851	16.7488	17.332	17.8398
54	334.6	16.8562	15.9591	16.2462	16.8246	17.4168	17.9441
53	334.7	16.933	16.0102	16.3077	16.8983	17.5111	18.0578
52	334.8	17.0102	16.0643	16.3621	16.9728	17.6065	18.1648
51	334.9	17.0888	16.1172	16.4227	17.045	17.6997	18.2878
50	335	17.1696	16.168	16.4829	17.1231	17.7967	18.4064
49	335.1	17.2486	16.2223	16.5435	17.1962	17.8959	18.5317
48	335.2	17.3318	16.2742	16.6082	17.278	18.0056	18.651
47	335.3	17.4118	16.3268	16.6671	17.3501	18.0976	18.7667
46	335.4	17.4972	16.3847	16.729	17.4314	18.2052	18.8989
45	335.5	17.5819	16.4431	16.8016	17.5112	18.3072	19.0253
44	335.6	17.664	16.4896	16.8574	17.589	18.4147	19.1505
43	335.7	17.7546	16.5485	16.9269	17.6747	18.5366	19.2904
42	335.8	17.8399	16.6023	16.993	17.7587	18.6442	19.4152
41	335.9	17.9248	16.6511	17.0531	17.8405	18.7543	19.5469
40	336	18.0158	16.7136	17.1295	17.9273	18.8671	19.6713
39	336.1	18.1062	16.768	17.1982	18.014	18.9819	19.8106
38	336.2	18.1949	16.8235	17.263	18.0998	19.0991	19.9448
37	336.3	18.2877	16.8774	17.3302	18.1883	19.218	20.0793
36	336.4	18.3786	16.9338	17.4058	18.2675	19.3425	20.2194
35	336.5	18.4754	16.9971	17.4768	18.36	19.467	20.3536
34	336.6	18.5664	17.0503	17.5502	18.445	19.5806	20.4831
33	336.7	18.6586	17.1105	17.6199	18.5314	19.7093	20.6234
32	336.8	18.7532	17.1725	17.6917	18.6174	19.8246	20.7585
31	336.9	18.8521	17.2333	17.7719	18.7177	19.9494	20.9023
30	337	18.9498	17.2942	17.8489	18.8099	20.0784	21.0389
29	337.1	19.0468	17.3592	17.9234	18.9038	20.2054	21.1767
28	337.2	19.1453	17.4242	18.0019	18.9941	20.334	21.3145
27	337.3	19.2415	17.4858	18.0725	19.084	20.4651	21.4667
26	337.4	19.3436	17.5516	18.1553	19.1824	20.5992	21.6043
25	337.5	19.4402	17.62	18.2314	19.2708	20.7266	21.757
24	337.6	19.542	17.6713	18.3103	19.3688	20.8627	21.8914
23	337.7	19.6441	17.7443	18.3884	19.4658	20.991	22.0449
22	337.8	19.7443	17.8126	18.465	19.5591	21.1325	22.1871
21	337.9	19.8458	17.8707	18.5476	19.6568	21.2496	22.3348
20	338	19.9482	17.9427	18.6332	19.7528	21.3916	22.477
19	338.1	20.0532	18.0095	18.7162	19.8545	21.5231	22.6186
18	338.2	20.1536	18.0744	18.7942	19.9538	21.6541	22.7671
17	338.3	20.2595	18.1484	18.8789	20.0527	21.7894	22.9159
16	338.4	20.3619	18.2104	18.9594	20.149	21.9253	23.0566
15	338.5	20.4674	18.2852	19.046	20.2532	22.0637	23.1972
14	338.6	20.5734	18.3549	19.1374	20.3502	22.2	23.3507
13	338.7	20.677	18.4333	19.2243	20.451	22.343	23.4909
12	338.8	20.7809	18.5	19.3055	20.548	22.4734	23.6392
11	338.9	20.89	18.5769	19.3925	20.6536	22.6229	23.7862
10	339	20.9929	18.6528	19.4804	20.7495	22.7526	23.9268
9	339.1	21.0957	18.7308	19.5644	20.8454	22.8861	24.069
8	339.2	21.202	18.7983	19.6552	20.9506	23.0207	24.1988
7	339.3	21.307	18.8733	19.7387	21.0532	23.1573	24.3576
6	339.4	21.4163	18.9583	19.8236	21.1567	23.2939	24.4842
5	339.5	21.5204	19.0302	19.9137	21.2616	23.4188	24.6303
4	339.6	21.6288	19.1143	19.9979	21.3599	23.5638	24.7776
3	339.7	21.7356	19.1893	20.0897	21.4641	23.7011	24.9188
2	339.8	21.8397	19.2717	20.1708	21.5652	23.8314	25.0658
1	339.9	21.9435	19.353	20.2605	21.666	23.9551	25.1987
0	340	22.0533	19.4319	20.3506	21.7676	24.096	25.3457

## Sheet: d11Bm
	age	mean	5	16	50	84	95
750	265	11.7614	11.4276	11.537	11.7441	11.9767	12.1229
749	265.1	11.7761	11.446	11.5567	11.7572	11.9875	12.1332
748	265.2	11.7873	11.4626	11.5724	11.768	11.9958	12.1392
747	265.3	11.8019	11.4965	11.5979	11.7822	12.0056	12.1493
746	265.4	11.8123	11.5047	11.6084	11.792	12.016	12.16
745	265.5	11.8268	11.5175	11.6232	11.8088	12.029	12.1674
744	265.6	11.8359	11.5291	11.6327	11.8165	12.0365	12.1721
743	265.7	11.8468	11.5388	11.6437	11.8266	12.046	12.1784
742	265.8	11.8595	11.5483	11.6544	11.8412	12.0593	12.1892
741	265.9	11.8679	11.5577	11.6631	11.8504	12.067	12.194
740	266	11.8786	11.5656	11.6724	11.8631	12.078	12.204
739	266.1	11.8878	11.5811	11.6833	11.8727	12.0853	12.2089
738	266.2	11.8968	11.5956	11.6919	11.8835	12.094	12.2239
737	266.3	11.906	11.6037	11.7019	11.8928	12.1001	12.2364
736	266.4	11.9118	11.6095	11.7078	11.8992	12.109	12.2412
735	266.5	11.9201	11.6098	11.7099	11.9083	12.1223	12.2546
734	266.6	11.9292	11.6134	11.7139	11.9186	12.1365	12.2649
733	266.7	11.9348	11.6172	11.72	11.9232	12.1405	12.2694
732	266.8	11.9434	11.619	11.7232	11.9341	12.1537	12.2786
731	266.9	11.9482	11.6195	11.726	11.9388	12.1592	12.2879
730	267	11.9555	11.6211	11.7297	11.9459	12.1686	12.2966
729	267.1	11.9598	11.6197	11.73	11.9499	12.1784	12.3076
728	267.2	11.9651	11.6229	11.7337	11.9567	12.1814	12.3127
727	267.3	11.9696	11.622	11.7329	11.9609	12.1914	12.3232
726	267.4	11.9755	11.6256	11.7362	11.9678	12.1988	12.3346
725	267.5	11.979	11.6225	11.7357	11.9713	12.2086	12.3418
724	267.6	11.9862	11.6256	11.7413	11.9787	12.2194	12.3538
723	267.7	11.988	11.6242	11.7417	11.9824	12.2231	12.3594
722	267.8	11.9929	11.6237	11.7428	11.9864	12.2302	12.3707
721	267.9	11.9977	11.6225	11.7451	11.9927	12.2394	12.3773
720	268	12.0008	11.6217	11.7459	11.9947	12.2451	12.3865
719	268.1	12.0041	11.6228	11.747	12.0007	12.2505	12.3941
718	268.2	12.0078	11.619	11.7483	12.0026	12.257	12.3991
717	268.3	12.0122	11.6189	11.7496	12.0071	12.2631	12.4117
716	268.4	12.0143	11.6199	11.7483	12.0079	12.267	12.4239
715	268.5	12.0175	11.6189	11.7504	12.0107	12.2738	12.434
714	268.6	12.0226	11.6205	11.7525	12.0162	12.279	12.445
713	268.7	12.0222	11.6163	11.749	12.0159	12.2795	12.4487
712	268.8	12.0287	11.6211	11.7538	12.0212	12.286	12.4575
711	268.9	12.0283	11.6182	11.753	12.0187	12.2891	12.4616
710	269	12.0309	11.6164	11.7531	12.0216	12.2935	12.4653
709	269.1	12.0342	11.6132	11.7526	12.0243	12.2989	12.4796
708	269.2	12.0367	11.6137	11.7543	12.0263	12.3037	12.4859
707	269.3	12.0396	11.6124	11.7556	12.0285	12.3098	12.4904
706	269.4	12.0421	11.615	11.7568	12.0286	12.3163	12.4946
705	269.5	12.0439	11.6083	11.757	12.032	12.3194	12.4966
704	269.6	12.0464	11.6104	11.7593	12.0341	12.3255	12.4986
703	269.7	12.0496	11.6091	11.7591	12.0364	12.3315	12.5086
702	269.8	12.0512	11.6083	11.7597	12.0372	12.3359	12.5143
701	269.9	12.0542	11.6093	11.7628	12.0396	12.3395	12.5213
700	270	12.0581	11.6102	11.7646	12.043	12.3456	12.5268
699	270.1	12.0593	11.6099	11.7682	12.0428	12.349	12.531
698	270.2	12.0629	11.6111	11.7704	12.0463	12.3537	12.5346
697	270.3	12.0653	11.6102	11.7708	12.0479	12.3591	12.5439
696	270.4	12.0672	11.6096	11.7729	12.0515	12.3613	12.5443
695	270.5	12.0708	11.609	11.7751	12.0544	12.3658	12.5537
694	270.6	12.0754	11.6114	11.7778	12.0576	12.3722	12.5613
693	270.7	12.0768	11.6108	11.7794	12.061	12.372	12.5589
692	270.8	12.0806	11.6129	11.7825	12.0634	12.3784	12.5689
691	270.9	12.0836	11.6125	11.7826	12.0667	12.3821	12.5715
690	271	12.0869	11.6152	11.7844	12.072	12.3865	12.5799
689	271.1	12.0902	11.6153	11.7858	12.0758	12.3888	12.5824
688	271.2	12.0917	11.6162	11.7852	12.0788	12.3914	12.5821
687	271.3	12.0969	11.6135	11.786	12.0861	12.3989	12.5891
686	271.4	12.0988	11.6141	11.7842	12.0876	12.401	12.5894
685	271.5	12.1027	11.615	11.7855	12.0921	12.4045	12.5956
684	271.6	12.1055	11.6155	11.7855	12.0986	12.4098	12.5941
683	271.7	12.1105	11.6151	11.7863	12.1046	12.4158	12.5994
682	271.8	12.1158	11.6165	11.791	12.1123	12.4229	12.6021
681	271.9	12.1171	11.6148	11.7873	12.1171	12.4233	12.6036
680	272	12.1199	11.6157	11.7911	12.1198	12.4257	12.6125
679	272.1	12.122	11.6132	11.7889	12.1222	12.4283	12.6181
678	272.2	12.1271	11.6142	11.7932	12.1296	12.4366	12.6248
677	272.3	12.1332	11.6155	11.7963	12.1369	12.4434	12.6328
676	272.4	12.1336	11.6122	11.798	12.1389	12.4439	12.6283
675	272.5	12.1371	11.6085	11.8005	12.1439	12.4482	12.6337
674	272.6	12.142	11.6108	11.8027	12.1485	12.4538	12.641
673	272.7	12.1443	11.6112	11.8032	12.1522	12.4562	12.6442
672	272.8	12.15	11.6131	11.8101	12.1583	12.4625	12.6449
671	272.9	12.1516	11.611	11.8107	12.1625	12.4627	12.6463
670	273	12.1549	11.6099	11.8112	12.1651	12.4691	12.6547
669	273.1	12.1574	11.6108	11.8131	12.168	12.4694	12.6557
668	273.2	12.1604	11.6113	11.8162	12.1696	12.473	12.663
667	273.3	12.1648	11.6109	11.8193	12.1769	12.4773	12.667
666	273.4	12.1655	11.6089	11.8191	12.1772	12.4788	12.6726
665	273.5	12.1676	11.6115	11.824	12.1788	12.4791	12.6723
664	273.6	12.171	11.6128	11.8254	12.1818	12.4832	12.6784
663	273.7	12.1728	11.6126	11.8284	12.1843	12.4849	12.6801
662	273.8	12.1733	11.6119	11.8283	12.187	12.4857	12.6774
661	273.9	12.1726	11.6089	11.828	12.1841	12.4859	12.6807
660	274	12.1733	11.6097	11.8294	12.1864	12.4847	12.6789
659	274.1	12.1723	11.6053	11.8273	12.1869	12.483	12.6817
658	274.2	12.1746	11.6145	11.8319	12.1869	12.4835	12.686
657	274.3	12.1732	11.6094	11.8272	12.1856	12.4827	12.6835
656	274.4	12.1732	11.6117	11.829	12.186	12.4801	12.6818
655	274.5	12.1725	11.614	11.829	12.1861	12.4792	12.6809
654	274.6	12.1704	11.6153	11.8297	12.1837	12.4766	12.6813
653	274.7	12.1662	11.6147	11.8266	12.1787	12.4709	12.6799
652	274.8	12.1627	11.6117	11.8206	12.174	12.4691	12.6784
651	274.9	12.161	11.6127	11.8212	12.171	12.4642	12.6782
650	275	12.1577	11.6129	11.8156	12.1676	12.4625	12.6777
649	275.1	12.1527	11.6168	11.817	12.1622	12.4521	12.67
648	275.2	12.1467	11.6129	11.8097	12.1552	12.446	12.6708
647	275.3	12.1413	11.6157	11.8079	12.1484	12.4381	12.6639
646	275.4	12.1356	11.6138	11.8027	12.1424	12.4326	12.6663
645	275.5	12.1289	11.6093	11.7977	12.1355	12.4213	12.6572
644	275.6	12.1209	11.6065	11.79	12.1245	12.4148	12.6523
643	275.7	12.113	11.6028	11.7837	12.1175	12.3986	12.6416
642	275.8	12.1023	11.5965	11.7717	12.1065	12.3902	12.6319
641	275.9	12.094	11.5941	11.7662	12.0935	12.3815	12.6291
640	276	12.084	11.5813	11.7565	12.0815	12.373	12.6202
639	276.1	12.0708	11.579	11.7474	12.067	12.3563	12.6062
638	276.2	12.0593	11.5692	11.7359	12.0533	12.3446	12.5963
637	276.3	12.047	11.5554	11.7286	12.0403	12.3277	12.5833
636	276.4	12.034	11.5482	11.7212	12.0258	12.3102	12.5703
635	276.5	12.0196	11.5403	11.7113	12.0075	12.2949	12.5577
634	276.6	12.0036	11.5271	11.6971	11.9923	12.2815	12.5402
633	276.7	11.9884	11.5207	11.6854	11.9738	12.2654	12.5185
632	276.8	11.9707	11.5101	11.6663	11.9552	12.2462	12.5004
631	276.9	11.9545	11.5049	11.6548	11.9392	12.2262	12.4873
630	277	11.9351	11.4896	11.6392	11.9194	12.2024	12.4604
629	277.1	11.917	11.4734	11.6258	11.901	12.1828	12.4347
628	277.2	11.8966	11.4595	11.6117	11.8773	12.1628	12.4175
627	277.3	11.8761	11.4392	11.595	11.8558	12.1418	12.3865
626	277.4	11.854	11.4241	11.5736	11.8355	12.1116	12.3596
625	277.5	11.8308	11.4123	11.5535	11.8122	12.0873	12.3321
624	277.6	11.8091	11.4034	11.5342	11.7884	12.0644	12.2989
623	277.7	11.7851	11.3818	11.5169	11.7649	12.0375	12.2685
622	277.8	11.7611	11.3551	11.4985	11.7405	12.0084	12.24
621	277.9	11.736	11.3341	11.4756	11.7134	11.9855	12.2057
620	278	11.7103	11.319	11.4505	11.6862	11.956	12.1749
619	278.1	11.685	11.3069	11.4275	11.6637	11.9276	12.1394
618	278.2	11.658	11.2757	11.4079	11.6365	11.8962	12.1032
617	278.3	11.6305	11.2477	11.3824	11.6076	11.8715	12.0744
616	278.4	11.6014	11.2276	11.3537	11.5786	11.837	12.0333
615	278.5	11.5714	11.2083	11.3269	11.5494	11.8004	11.9948
614	278.6	11.5431	11.1786	11.3019	11.523	11.7768	11.9621
613	278.7	11.5146	11.1492	11.2777	11.4932	11.7443	11.9249
612	278.8	11.4829	11.123	11.2464	11.4636	11.7091	11.8793
611	278.9	11.4531	11.102	11.217	11.4356	11.6792	11.8516
610	279	11.4212	11.0654	11.1933	11.4027	11.6444	11.8014
609	279.1	11.3903	11.0376	11.1594	11.3721	11.612	11.7726
608	279.2	11.3596	11.0115	11.1305	11.3453	11.5789	11.7367
607	279.3	11.326	10.971	11.1023	11.3146	11.5445	11.6887
606	279.4	11.2936	10.943	11.0651	11.2826	11.5044	11.657
605	279.5	11.2631	10.9182	11.0361	11.2528	11.4753	11.6193
604	279.6	11.2286	10.8832	11.0078	11.2218	11.4395	11.5827
603	279.7	11.1967	10.8508	10.972	11.1915	11.3981	11.5457
602	279.8	11.1631	10.8233	10.9374	11.158	11.3682	11.499
601	279.9	11.1302	10.7914	10.9107	11.1286	11.3347	11.4701
600	280	11.0967	10.755	10.8729	11.096	11.2929	11.4363
599	280.1	11.0635	10.7266	10.8402	11.0644	11.2638	11.3915
598	280.2	11.0298	10.6972	10.8113	11.0299	11.2313	11.3595
597	280.3	10.9959	10.6582	10.7737	10.998	11.1892	11.3217
596	280.4	10.9625	10.6296	10.7412	10.9645	11.1612	11.2832
595	280.5	10.9288	10.6005	10.7124	10.9301	11.1269	11.2519
594	280.6	10.8965	10.5594	10.6769	10.8988	11.0908	11.2067
593	280.7	10.8623	10.5308	10.6441	10.8612	11.0597	11.1777
592	280.8	10.8291	10.5028	10.614	10.8283	11.0271	11.1483
591	280.9	10.7978	10.4611	10.5792	10.7999	10.9955	11.1066
590	281	10.764	10.4304	10.5457	10.759	10.9664	11.0832
589	281.1	10.7323	10.4063	10.5189	10.7283	10.9332	11.0521
588	281.2	10.6996	10.366	10.4858	10.6945	10.8955	11.0114
587	281.3	10.6678	10.3308	10.4506	10.6623	10.8678	10.9876
586	281.4	10.6352	10.307	10.4203	10.6284	10.837	10.9612
585	281.5	10.6055	10.2725	10.3934	10.5986	10.8011	10.936
584	281.6	10.5747	10.2382	10.3567	10.5681	10.7742	10.9
583	281.7	10.5425	10.2124	10.3257	10.5356	10.7453	10.8762
582	281.8	10.5128	10.1817	10.3013	10.507	10.7122	10.8509
581	281.9	10.4845	10.1515	10.2671	10.4767	10.6826	10.8202
580	282	10.4544	10.1233	10.2356	10.4462	10.6557	10.7913
579	282.1	10.4246	10.1015	10.2081	10.4168	10.6266	10.7696
578	282.2	10.3973	10.0653	10.18	10.389	10.5954	10.7441
577	282.3	10.3684	10.0351	10.1483	10.36	10.5683	10.7079
576	282.4	10.3416	10.0144	10.1221	10.3329	10.5439	10.6881
575	282.5	10.3148	9.98646	10.0988	10.3051	10.5161	10.6673
574	282.6	10.2884	9.95317	10.0656	10.2788	10.4871	10.6407
573	282.7	10.2606	9.92801	10.038	10.2488	10.4621	10.6045
572	282.8	10.2363	9.91066	10.0148	10.2256	10.4386	10.5865
571	282.9	10.2099	9.88297	9.9907	10.1989	10.4057	10.5652
570	283	10.1854	9.85127	9.96363	10.1723	10.3832	10.5413
569	283.1	10.1622	9.8293	9.93981	10.1488	10.3637	10.5195
568	283.2	10.1383	9.812	9.91675	10.1259	10.3395	10.4938
567	283.3	10.1153	9.79533	9.89262	10.1037	10.3125	10.4739
566	283.4	10.0943	9.75959	9.87206	10.0809	10.289	10.456
565	283.5	10.0705	9.73653	9.85	10.057	10.2688	10.4279
564	283.6	10.0502	9.72202	9.83072	10.0385	10.2511	10.4025
563	283.7	10.0287	9.70858	9.80922	10.0171	10.226	10.3862
562	283.8	10.0099	9.68825	9.7888	9.99593	10.1998	10.3709
561	283.9	9.98987	9.66283	9.77075	9.97564	10.1828	10.3492
560	284	9.97085	9.64104	9.75321	9.95778	10.1669	10.3307
559	284.1	9.95187	9.62708	9.73694	9.94079	10.1482	10.3011
558	284.2	9.93393	9.61384	9.71854	9.92363	10.128	10.2864
557	284.3	9.91764	9.60407	9.70288	9.90626	10.1061	10.2728
556	284.4	9.90161	9.58721	9.6865	9.88858	10.0884	10.2554
555	284.5	9.88424	9.56431	9.67094	9.87087	10.0734	10.2378
554	284.6	9.8699	9.55114	9.65984	9.85745	10.0601	10.2176
553	284.7	9.85519	9.53699	9.64585	9.84447	10.0468	10.1986
552	284.8	9.8405	9.52559	9.63296	9.82986	10.0287	10.1859
551	284.9	9.82907	9.5177	9.62264	9.81938	10.0115	10.1765
550	285	9.81481	9.51005	9.60999	9.8042	9.99481	10.1631
549	285.1	9.80401	9.50369	9.60184	9.79192	9.98543	10.1506
548	285.2	9.79121	9.49142	9.5854	9.77922	9.97424	10.1366
547	285.3	9.78152	9.48153	9.57831	9.77005	9.96472	10.1215
546	285.4	9.77098	9.46654	9.56895	9.75957	9.95375	10.1046
545	285.5	9.76224	9.46044	9.56155	9.75059	9.94333	10.0942
544	285.6	9.75415	9.45041	9.55435	9.74179	9.93529	10.0884
543	285.7	9.74639	9.4468	9.54922	9.73473	9.92325	10.0786
542	285.8	9.73918	9.44164	9.54377	9.72845	9.91232	10.068
541	285.9	9.73332	9.43738	9.539	9.72301	9.90286	10.061
540	286	9.72865	9.43491	9.53624	9.7185	9.89758	10.0547
539	286.1	9.72302	9.43313	9.53311	9.71285	9.89272	10.0466
538	286.2	9.71883	9.43138	9.53098	9.70913	9.8887	10.0377
537	286.3	9.71611	9.42899	9.52792	9.70692	9.88661	10.0344
536	286.4	9.71338	9.42999	9.5273	9.70365	9.88354	10.0255
535	286.5	9.71264	9.43134	9.52877	9.70262	9.88196	10.0233
534	286.6	9.71227	9.43265	9.52928	9.70251	9.88082	10.0183
533	286.7	9.71231	9.43524	9.53116	9.70254	9.87984	10.0136
532	286.8	9.71422	9.43859	9.53397	9.70363	9.88161	10.0138
531	286.9	9.71618	9.44227	9.53702	9.7057	9.88169	10.0146
530	287	9.71868	9.44653	9.54058	9.70747	9.88292	10.0155
529	287.1	9.72253	9.4536	9.54591	9.71118	9.8856	10.0109
528	287.2	9.72856	9.465	9.55416	9.71699	9.88907	10.0177
527	287.3	9.73374	9.47807	9.56098	9.72199	9.89247	10.0191
526	287.4	9.741	9.49637	9.56811	9.72871	9.89725	10.0271
525	287.5	9.74868	9.50555	9.57826	9.7368	9.90235	10.0315
524	287.6	9.75771	9.51176	9.59061	9.74536	9.91381	10.0358
523	287.7	9.76799	9.51922	9.60382	9.75478	9.92496	10.0447
522	287.8	9.77942	9.52778	9.6158	9.76579	9.93522	10.054
521	287.9	9.79197	9.53906	9.62737	9.77874	9.94689	10.0629
520	288	9.80552	9.55706	9.64045	9.79295	9.95964	10.0737
519	288.1	9.82015	9.58842	9.65773	9.80965	9.97139	10.0839
518	288.2	9.83496	9.60595	9.67557	9.82313	9.98261	10.0921
517	288.3	9.85239	9.61751	9.69746	9.83994	9.99505	10.1061
516	288.4	9.87069	9.6307	9.71548	9.85842	10.0153	10.1262
515	288.5	9.89031	9.65189	9.73225	9.87725	10.0378	10.146
514	288.6	9.91121	9.68674	9.7528	9.89908	10.0582	10.1663
513	288.7	9.93385	9.70978	9.77789	9.92173	10.0767	10.1841
512	288.8	9.95685	9.72663	9.80681	9.94441	10.0944	10.1973
511	288.9	9.9809	9.74869	9.82818	9.96981	10.1221	10.2242
510	289	10.0083	9.79013	9.8524	9.998	10.1523	10.2577
509	289.1	10.0349	9.81433	9.88227	10.0231	10.1756	10.2787
508	289.2	10.0646	9.83592	9.91648	10.0514	10.1994	10.2975
507	289.3	10.095	9.87233	9.94266	10.0847	10.2355	10.3369
506	289.4	10.1266	9.90992	9.97447	10.116	10.266	10.3693
505	289.5	10.1601	9.93204	10.0131	10.1473	10.2955	10.393
504	289.6	10.1947	9.972	10.0424	10.1841	10.3351	10.4353
503	289.7	10.2318	10.0113	10.0834	10.2206	10.3718	10.4758
502	289.8	10.2704	10.0391	10.1213	10.2576	10.4055	10.5028
501	289.9	10.3101	10.0901	10.156	10.2998	10.4534	10.5572
500	290	10.3516	10.121	10.2063	10.3386	10.4897	10.5905
499	290.1	10.3947	10.1593	10.2395	10.3841	10.5386	10.6411
498	290.2	10.4393	10.2101	10.293	10.4271	10.581	10.6842
497	290.3	10.485	10.2434	10.3296	10.4747	10.631	10.7355
496	290.4	10.5357	10.3039	10.3815	10.5235	10.6812	10.7871
495	290.5	10.5858	10.3381	10.4275	10.5754	10.737	10.8428
494	290.6	10.6365	10.3969	10.4778	10.6252	10.7848	10.8905
493	290.7	10.6885	10.4342	10.526	10.6781	10.8441	10.9519
492	290.8	10.7456	10.4979	10.5837	10.7355	10.8965	11.0063
491	290.9	10.8027	10.5392	10.6347	10.792	10.9636	11.0705
490	291	10.8617	10.6017	10.7003	10.8526	11.0231	11.1333
489	291.1	10.9221	10.6481	10.7487	10.9106	11.0838	11.1932
488	291.2	10.9856	10.7125	10.8154	10.9756	11.1554	11.2662
487	291.3	11.0519	10.7689	10.8757	11.0423	11.2222	11.3374
486	291.4	11.1179	10.8288	10.9361	11.1068	11.291	11.3988
485	291.5	11.1862	10.9006	11.0086	11.1768	11.3657	11.4754
484	291.6	11.2567	10.9535	11.0696	11.2478	11.4393	11.5549
483	291.7	11.3296	11.0245	11.1401	11.3201	11.5119	11.6299
482	291.8	11.4041	11.0982	11.2135	11.3949	11.5908	11.6994
481	291.9	11.482	11.1612	11.2883	11.4729	11.6758	11.7874
480	292	11.5586	11.2322	11.3568	11.5509	11.7569	11.872
479	292.1	11.6399	11.3112	11.4354	11.6324	11.8401	11.9597
478	292.2	11.7196	11.3842	11.5161	11.7124	11.9213	12.0426
477	292.3	11.8047	11.4603	11.6005	11.7965	12.0071	12.1327
476	292.4	11.89	11.5391	11.6773	11.883	12.0949	12.2195
475	292.5	11.9774	11.6206	11.7592	11.971	12.1852	12.3058
474	292.6	12.0654	11.7091	11.8445	12.06	12.279	12.397
473	292.7	12.157	11.8003	11.9336	12.1522	12.3744	12.4933
472	292.8	12.2492	11.881	12.0252	12.245	12.4686	12.5899
471	292.9	12.3422	11.9656	12.115	12.3393	12.5645	12.6868
470	293	12.4398	12.0582	12.2111	12.4379	12.6641	12.7877
469	293.1	12.535	12.1498	12.3058	12.5337	12.76	12.884
468	293.2	12.634	12.2424	12.4038	12.6339	12.8608	12.987
467	293.3	12.7341	12.3399	12.5009	12.7346	12.9622	13.0888
466	293.4	12.8358	12.4405	12.6006	12.8346	13.0662	13.1927
465	293.5	12.936	12.5363	12.7011	12.9374	13.1665	13.2915
464	293.6	13.0415	12.6371	12.8041	13.0418	13.2733	13.3995
463	293.7	13.144	12.7401	12.9054	13.1451	13.3745	13.5059
462	293.8	13.25	12.8434	13.0099	13.2512	13.4812	13.6148
461	293.9	13.3547	12.9479	13.1138	13.356	13.585	13.7198
460	294	13.4608	13.0509	13.2168	13.4628	13.6922	13.8283
459	294.1	13.5662	13.1562	13.3223	13.5673	13.7963	13.9344
458	294.2	13.6747	13.2672	13.4316	13.6756	13.9061	14.0452
457	294.3	13.7842	13.3798	13.5404	13.7851	14.0162	14.1533
456	294.4	13.8914	13.4921	13.6477	13.8914	14.1245	14.2626
455	294.5	14	13.5982	13.7569	14.0017	14.234	14.3693
454	294.6	14.1061	13.7032	13.8648	14.1061	14.3408	14.4763
453	294.7	14.2124	13.8117	13.9734	14.2125	14.4459	14.581
452	294.8	14.3193	13.9154	14.0816	14.3195	14.5526	14.6883
451	294.9	14.4273	14.0244	14.1958	14.4268	14.6596	14.7928
450	295	14.531	14.129	14.3024	14.5304	14.762	14.8933
449	295.1	14.6376	14.2339	14.4088	14.6355	14.8667	14.9996
448	295.2	14.7391	14.338	14.511	14.7364	14.9693	15.1
447	295.3	14.8422	14.4443	14.6147	14.8395	15.0706	15.2
446	295.4	14.9439	14.547	14.715	14.9396	15.1731	15.3077
445	295.5	15.0451	14.649	14.8158	15.0405	15.2737	15.4109
444	295.6	15.1443	14.7521	14.9152	15.1385	15.3733	15.508
443	295.7	15.2385	14.8485	15.0105	15.2321	15.4652	15.5988
442	295.8	15.3341	14.9436	15.1073	15.328	15.5594	15.6985
441	295.9	15.428	15.0388	15.2008	15.4203	15.6551	15.7955
440	296	15.5209	15.1288	15.2895	15.5129	15.7496	15.8906
439	296.1	15.6093	15.2204	15.375	15.6001	15.8396	15.9835
438	296.2	15.6973	15.3109	15.4604	15.6894	15.9252	16.0727
437	296.3	15.7806	15.4011	15.5397	15.7728	16.0051	16.1575
436	296.4	15.8629	15.4799	15.6228	15.8557	16.0889	16.2403
435	296.5	15.9427	15.5475	15.702	15.9381	16.1736	16.3165
434	296.6	16.0195	15.6217	15.7705	16.0167	16.2545	16.3957
433	296.7	16.0927	15.6971	15.8434	16.0875	16.329	16.4762
432	296.8	16.167	15.7604	15.9165	16.1662	16.398	16.5548
431	296.9	16.236	15.8351	15.9845	16.2339	16.4718	16.6198
430	297	16.3023	15.8945	16.043	16.3025	16.5436	16.6895
429	297.1	16.3658	15.9541	16.1076	16.3658	16.6024	16.7598
428	297.2	16.4264	16.0134	16.1658	16.4283	16.6676	16.8157
427	297.3	16.4845	16.0664	16.22	16.4867	16.7269	16.8815
426	297.4	16.5373	16.1168	16.2723	16.5413	16.7785	16.938
425	297.5	16.5901	16.1646	16.322	16.5951	16.8351	16.9885
424	297.6	16.6384	16.2138	16.3682	16.6427	16.8813	17.0439
423	297.7	16.6848	16.2465	16.4156	16.6911	16.9306	17.0847
422	297.8	16.726	16.293	16.4491	16.7322	16.9746	17.1388
421	297.9	16.7663	16.3267	16.4913	16.7752	17.0091	17.1744
420	298	16.805	16.3579	16.5289	16.8117	17.0574	17.2126
419	298.1	16.8375	16.3937	16.5588	16.8454	17.0873	17.2538
418	298.2	16.8695	16.4182	16.591	16.8793	17.1189	17.2824
417	298.3	16.8981	16.4425	16.6174	16.9066	17.1515	17.31
416	298.4	16.9235	16.4629	16.6407	16.932	17.1791	17.3424
415	298.5	16.9473	16.4921	16.6649	16.9576	17.1981	17.3653
414	298.6	16.9689	16.5099	16.6862	16.9788	17.2237	17.3861
413	298.7	16.9854	16.5191	16.7061	16.9938	17.2443	17.4019
412	298.8	16.9997	16.5315	16.7186	17.0089	17.2588	17.4213
411	298.9	17.014	16.5431	16.7292	17.0245	17.2741	17.4387
410	299	17.0234	16.55	16.7404	17.034	17.2819	17.4504
409	299.1	17.0328	16.5609	16.749	17.0429	17.2908	17.4621
408	299.2	17.0382	16.5652	16.7545	17.049	17.2964	17.4675
407	299.3	17.0423	16.5672	16.7584	17.0531	17.3003	17.4722
406	299.4	17.0455	16.5691	16.7614	17.0587	17.3055	17.4733
405	299.5	17.0439	16.572	16.7582	17.0562	17.3031	17.472
404	299.6	17.0433	16.5636	16.7565	17.0561	17.3032	17.4731
403	299.7	17.0393	16.5605	16.7536	17.0511	17.2998	17.4731
402	299.8	17.0351	16.5577	16.7469	17.0501	17.2949	17.4675
401	299.9	17.0281	16.5482	16.7414	17.042	17.29	17.4606
400	300	17.0179	16.542	16.7301	17.0334	17.2793	17.4496
399	300.1	17.0096	16.5348	16.7228	17.0237	17.2737	17.4421
398	300.2	16.999	16.5248	16.7141	17.0129	17.2639	17.4286
397	300.3	16.9875	16.5182	16.7062	16.9993	17.252	17.4182
396	300.4	16.9755	16.5021	16.6882	16.9876	17.2427	17.4022
395	300.5	16.9603	16.494	16.6682	16.9731	17.2235	17.3907
394	300.6	16.9457	16.4699	16.6539	16.955	17.2102	17.38
393	300.7	16.9277	16.4508	16.6393	16.9367	17.1906	17.3655
392	300.8	16.9101	16.4353	16.6234	16.9186	17.1773	17.3528
391	300.9	16.8951	16.4235	16.6093	16.901	17.1626	17.3394
390	301	16.8762	16.4055	16.5875	16.8797	17.146	17.322
389	301.1	16.8584	16.3861	16.5665	16.8613	17.1285	17.297
388	301.2	16.8375	16.363	16.5488	16.8378	17.1038	17.2858
387	301.3	16.8182	16.3423	16.5333	16.8164	17.0867	17.2705
386	301.4	16.7998	16.3237	16.5163	16.7964	17.0713	17.2553
385	301.5	16.7801	16.3097	16.4976	16.7748	17.0529	17.2398
384	301.6	16.7602	16.2895	16.4769	16.7536	17.031	17.2226
383	301.7	16.7412	16.2612	16.4604	16.7334	17.0095	17.2052
382	301.8	16.7174	16.2402	16.4383	16.7074	16.9868	17.1859
381	301.9	16.6983	16.2229	16.4206	16.6882	16.9698	17.1689
380	302	16.6789	16.2015	16.4032	16.6686	16.9508	17.1535
379	302.1	16.6593	16.1845	16.3865	16.6473	16.927	17.1331
378	302.2	16.6395	16.164	16.3653	16.6265	16.9032	17.1101
377	302.3	16.6174	16.1408	16.3442	16.6038	16.8849	17.0893
376	302.4	16.6004	16.124	16.3267	16.5863	16.8722	17.0812
375	302.5	16.5805	16.1063	16.3116	16.5673	16.8514	17.0609
374	302.6	16.5613	16.0875	16.2914	16.5476	16.8285	17.0477
373	302.7	16.5417	16.0693	16.2673	16.5268	16.8057	17.028
372	302.8	16.5245	16.055	16.2508	16.5094	16.788	17.0008
371	302.9	16.5057	16.0374	16.2308	16.4904	16.7723	16.9888
370	303	16.4884	16.0193	16.2124	16.475	16.7551	16.9746
369	303.1	16.4718	16.0091	16.1984	16.4587	16.7366	16.9553
368	303.2	16.4535	15.9904	16.1756	16.4401	16.716	16.9444
367	303.3	16.4383	15.9773	16.1598	16.4257	16.6981	16.9238
366	303.4	16.4217	15.9606	16.1424	16.408	16.6831	16.907
365	303.5	16.4063	15.9482	16.1251	16.3936	16.6686	16.8938
364	303.6	16.3926	15.9356	16.1114	16.381	16.6554	16.8793
363	303.7	16.3774	15.9206	16.097	16.3652	16.6406	16.8646
362	303.8	16.3631	15.9105	16.0781	16.3498	16.6238	16.8496
361	303.9	16.3489	15.9005	16.0631	16.3358	16.6066	16.8355
360	304	16.3379	15.8891	16.0519	16.3265	16.5965	16.8268
359	304.1	16.3245	15.8693	16.0398	16.3123	16.585	16.811
358	304.2	16.3152	15.8562	16.0273	16.3031	16.5806	16.8018
357	304.3	16.3027	15.8455	16.0149	16.2877	16.5688	16.7871
356	304.4	16.2916	15.8357	16.0028	16.278	16.557	16.7803
355	304.5	16.2819	15.8264	15.9912	16.2676	16.5492	16.77
354	304.6	16.2726	15.8204	15.9854	16.2572	16.5395	16.757
353	304.7	16.2634	15.8112	15.9738	16.2486	16.5318	16.7477
352	304.8	16.2546	15.8039	15.9635	16.2397	16.5245	16.7395
351	304.9	16.248	15.7955	15.9562	16.232	16.5181	16.7338
350	305	16.2381	15.7819	15.9467	16.2229	16.5063	16.7195
349	305.1	16.2333	15.7743	15.9419	16.2165	16.5033	16.7191
348	305.2	16.2248	15.7617	15.9331	16.2076	16.4988	16.7115
347	305.3	16.2206	15.7603	15.9297	16.2019	16.4946	16.7019
346	305.4	16.2148	15.7523	15.9259	16.1969	16.4884	16.6975
345	305.5	16.211	15.7487	15.9214	16.191	16.4868	16.6987
344	305.6	16.2058	15.742	15.9183	16.1854	16.4831	16.6954
343	305.7	16.2013	15.7366	15.9129	16.1813	16.4792	16.6933
342	305.8	16.1986	15.7333	15.9103	16.1777	16.4783	16.6945
341	305.9	16.1945	15.7293	15.9071	16.1736	16.4742	16.6933
340	306	16.1934	15.7274	15.9045	16.1727	16.4741	16.6939
339	306.1	16.1907	15.7271	15.903	16.171	16.4707	16.6913
338	306.2	16.1891	15.7238	15.9013	16.1699	16.4708	16.695
337	306.3	16.1876	15.7232	15.8982	16.1697	16.4709	16.6914
336	306.4	16.1851	15.7198	15.897	16.1669	16.4686	16.6934
335	306.5	16.1842	15.7196	15.8937	16.1674	16.4677	16.6907
334	306.6	16.1857	15.7223	15.8979	16.1682	16.4663	16.6911
333	306.7	16.184	15.7176	15.894	16.1665	16.4669	16.6909
332	306.8	16.1863	15.7184	15.8958	16.1697	16.4698	16.6939
331	306.9	16.1867	15.7197	15.8963	16.1703	16.4694	16.6931
330	307	16.1885	15.7212	15.8988	16.1724	16.4703	16.698
329	307.1	16.1896	15.7211	15.8999	16.1731	16.4719	16.6969
328	307.2	16.1922	15.7227	15.9022	16.176	16.4736	16.6991
327	307.3	16.1937	15.724	15.9035	16.1788	16.4736	16.6961
326	307.4	16.1975	15.7263	15.9069	16.1835	16.4776	16.7014
325	307.5	16.2	15.7287	15.9099	16.1874	16.4792	16.6992
324	307.6	16.2002	15.7277	15.911	16.1884	16.4796	16.6986
323	307.7	16.2057	15.7326	15.9158	16.1933	16.4837	16.7
322	307.8	16.209	15.7365	15.921	16.1953	16.4858	16.7015
321	307.9	16.2131	15.7395	15.9253	16.2001	16.4906	16.7047
320	308	16.2165	15.7436	15.9303	16.2049	16.4906	16.7083
319	308.1	16.2224	15.7492	15.9364	16.2086	16.4969	16.7133
318	308.2	16.2265	15.7549	15.9407	16.2127	16.5006	16.7195
317	308.3	16.2308	15.7593	15.9471	16.2168	16.5042	16.7218
316	308.4	16.236	15.767	15.9536	16.2205	16.5105	16.7258
315	308.5	16.2396	15.7711	15.9584	16.2247	16.5146	16.7302
314	308.6	16.2463	15.7787	15.967	16.2307	16.521	16.7379
313	308.7	16.2499	15.7879	15.9753	16.2341	16.5233	16.7335
312	308.8	16.2577	15.8012	15.985	16.241	16.5317	16.7386
311	308.9	16.2619	15.8061	15.9896	16.2456	16.5351	16.7415
310	309	16.2696	15.815	16.0005	16.253	16.5414	16.7453
309	309.1	16.275	15.8214	16.006	16.2578	16.5469	16.7486
308	309.2	16.2805	15.8268	16.0106	16.263	16.5531	16.7509
307	309.3	16.2878	15.8351	16.0178	16.2696	16.5575	16.7571
306	309.4	16.2947	15.8408	16.0246	16.2761	16.5661	16.7602
305	309.5	16.3008	15.8509	16.0309	16.2823	16.5717	16.7636
304	309.6	16.308	15.8601	16.0378	16.2899	16.5761	16.7679
303	309.7	16.3143	15.8744	16.0479	16.2964	16.5806	16.7697
302	309.8	16.321	15.885	16.0532	16.3029	16.5858	16.7745
301	309.9	16.3282	15.8994	16.061	16.3093	16.5931	16.7805
300	310	16.3363	15.91	16.0706	16.3174	16.6007	16.7874
299	310.1	16.3424	15.9164	16.0793	16.3239	16.6076	16.7872
298	310.2	16.3507	15.9242	16.0891	16.3313	16.6185	16.7959
297	310.3	16.3574	15.9358	16.1009	16.3377	16.6229	16.7991
296	310.4	16.3643	15.9456	16.1061	16.344	16.6303	16.8057
295	310.5	16.3726	15.9567	16.1117	16.3514	16.6387	16.8136
294	310.6	16.3788	15.9672	16.1182	16.3593	16.6443	16.8159
293	310.7	16.3855	15.9788	16.1245	16.3647	16.6506	16.8222
292	310.8	16.3939	15.9921	16.1307	16.3721	16.6591	16.829
291	310.9	16.4006	16.0048	16.1371	16.3769	16.6639	16.8311
290	311	16.4087	16.0123	16.143	16.3849	16.6734	16.8448
289	311.1	16.4168	16.0204	16.1511	16.3946	16.679	16.8506
288	311.2	16.4232	16.0261	16.155	16.3999	16.6862	16.8607
287	311.3	16.4308	16.0301	16.1606	16.4071	16.6948	16.8697
286	311.4	16.4374	16.0349	16.1662	16.4138	16.7016	16.8771
285	311.5	16.4449	16.0431	16.1739	16.4219	16.7109	16.8815
284	311.6	16.4507	16.0461	16.1792	16.4274	16.7205	16.889
283	311.7	16.4594	16.052	16.1872	16.4359	16.7313	16.9023
282	311.8	16.467	16.0628	16.1978	16.4448	16.7389	16.9119
281	311.9	16.4737	16.064	16.2016	16.4507	16.7499	16.9271
280	312	16.4793	16.0664	16.2039	16.4561	16.7567	16.942
279	312.1	16.4855	16.0675	16.2079	16.4625	16.7641	16.9499
278	312.2	16.4926	16.0747	16.2154	16.4691	16.7717	16.9603
277	312.3	16.4979	16.0755	16.2167	16.4729	16.782	16.9701
276	312.4	16.5052	16.0792	16.2185	16.4811	16.7919	16.9829
275	312.5	16.5109	16.0858	16.2217	16.4882	16.7983	16.9897
274	312.6	16.5161	16.0845	16.225	16.4925	16.8092	17
273	312.7	16.5233	16.0872	16.2274	16.501	16.8209	17.0189
272	312.8	16.5259	16.0793	16.2253	16.5061	16.8256	17.0286
271	312.9	16.5308	16.0814	16.2272	16.5121	16.8335	17.0377
270	313	16.5369	16.0828	16.2266	16.5205	16.8433	17.0472
269	313.1	16.5416	16.0813	16.2273	16.5269	16.8527	17.0605
268	313.2	16.5455	16.0719	16.2263	16.5327	16.8587	17.0682
267	313.3	16.5502	16.0718	16.2273	16.5366	16.8669	17.0792
266	313.4	16.5537	16.0669	16.2275	16.5401	16.8728	17.0861
265	313.5	16.5589	16.0638	16.2286	16.5469	16.8784	17.0931
264	313.6	16.5611	16.0601	16.2268	16.5499	16.8847	17.1004
263	313.7	16.5644	16.0537	16.2257	16.5548	16.8897	17.1115
262	313.8	16.5677	16.05	16.2241	16.5585	16.8961	17.1219
261	313.9	16.5704	16.0473	16.224	16.5617	16.8995	17.1358
260	314	16.572	16.041	16.2204	16.5662	16.9048	17.1375
259	314.1	16.5735	16.0359	16.2181	16.5676	16.9118	17.1487
258	314.2	16.5752	16.0314	16.2168	16.5709	16.9157	17.1541
257	314.3	16.5772	16.0257	16.2135	16.5737	16.9213	17.1595
256	314.4	16.579	16.02	16.2128	16.5767	16.9248	17.1668
255	314.5	16.5786	16.0151	16.2087	16.5749	16.9291	17.1751
254	314.6	16.5782	16.0077	16.2041	16.5772	16.9306	17.1777
253	314.7	16.5793	16.0051	16.203	16.5782	16.9353	17.1825
252	314.8	16.5771	15.9958	16.1975	16.5748	16.9353	17.1868
251	314.9	16.5766	15.9893	16.1934	16.5749	16.9392	17.1879
250	315	16.575	15.9802	16.1881	16.5751	16.9396	17.1911
249	315.1	16.5724	15.9711	16.184	16.5723	16.9388	17.1943
248	315.2	16.5718	15.9661	16.1827	16.5718	16.9397	17.1974
247	315.3	16.5683	15.9559	16.1775	16.5692	16.9373	17.199
246	315.4	16.5674	15.949	16.1747	16.5696	16.9366	17.2051
245	315.5	16.5633	15.9406	16.1704	16.5642	16.9342	17.2029
244	315.6	16.5604	15.9318	16.1645	16.5626	16.9329	17.2063
243	315.7	16.5549	15.9192	16.1561	16.5573	16.9322	17.2044
242	315.8	16.5505	15.9137	16.1526	16.5533	16.9265	17.2106
241	315.9	16.5462	15.9083	16.1474	16.549	16.925	17.206
240	316	16.5407	15.8983	16.1403	16.5442	16.9205	17.2089
239	316.1	16.5353	15.8871	16.1359	16.5396	16.9151	17.1984
238	316.2	16.529	15.874	16.1294	16.5325	16.9106	17.1952
237	316.3	16.5243	15.861	16.1226	16.5297	16.9075	17.1886
236	316.4	16.5154	15.8507	16.1133	16.5201	16.8984	17.1829
235	316.5	16.5085	15.8408	16.1076	16.5135	16.8925	17.1782
234	316.6	16.5027	15.8311	16.0974	16.508	16.89	17.1758
233	316.7	16.4941	15.8212	16.0878	16.4997	16.8831	17.1704
232	316.8	16.4837	15.8114	16.0767	16.489	16.8737	17.1616
231	316.9	16.4763	15.8042	16.0676	16.4817	16.8674	17.1534
230	317	16.4672	15.7937	16.0574	16.4733	16.8576	17.1481
229	317.1	16.457	15.7818	16.0469	16.4617	16.849	17.1373
228	317.2	16.4476	15.7714	16.0387	16.4523	16.8394	17.1231
227	317.3	16.4381	15.7536	16.0296	16.443	16.8313	17.1142
226	317.4	16.4271	15.7415	16.0196	16.4316	16.8196	17.1005
225	317.5	16.4158	15.7273	16.0073	16.4211	16.8055	17.0892
224	317.6	16.406	15.7148	15.9966	16.414	16.7978	17.0784
223	317.7	16.3943	15.7032	15.9835	16.4029	16.7874	17.068
222	317.8	16.3818	15.6928	15.9714	16.388	16.7756	17.0554
221	317.9	16.3691	15.6793	15.958	16.3748	16.7636	17.0411
220	318	16.3563	15.665	15.9459	16.3623	16.7521	17.027
219	318.1	16.3427	15.6454	15.9349	16.3482	16.7394	17.0096
218	318.2	16.3304	15.629	15.9214	16.3368	16.7242	16.996
217	318.3	16.3149	15.6164	15.9078	16.3207	16.7076	16.9775
216	318.4	16.3041	15.6055	15.8983	16.31	16.6985	16.9631
215	318.5	16.2888	15.5886	15.8782	16.2966	16.6854	16.9453
214	318.6	16.276	15.5768	15.8641	16.2829	16.6766	16.935
213	318.7	16.2594	15.5567	15.8495	16.2649	16.6626	16.9099
212	318.8	16.2475	15.549	15.8384	16.2518	16.6507	16.8978
211	318.9	16.2309	15.5293	15.8211	16.2334	16.6375	16.8877
210	319	16.2159	15.5164	15.8074	16.2177	16.6241	16.8736
209	319.1	16.2006	15.5029	15.7891	16.2025	16.6086	16.8614
208	319.2	16.1855	15.492	15.7686	16.1877	16.5934	16.85
207	319.3	16.1695	15.4717	15.7516	16.1719	16.5794	16.8367
206	319.4	16.1539	15.4595	15.7376	16.1524	16.5644	16.8241
205	319.5	16.139	15.442	15.7198	16.1368	16.5505	16.82
204	319.6	16.1223	15.4281	15.7072	16.1184	16.5324	16.8032
203	319.7	16.1062	15.4152	15.689	16.0992	16.52	16.7965
202	319.8	16.0919	15.4026	15.6702	16.0837	16.5062	16.7845
201	319.9	16.0753	15.3822	15.6511	16.0652	16.4941	16.7772
200	320	16.0601	15.3688	15.6365	16.0485	16.4817	16.7685
199	320.1	16.042	15.355	15.6181	16.0269	16.4669	16.7585
198	320.2	16.027	15.3378	15.6018	16.0087	16.4576	16.7506
197	320.3	16.0104	15.3235	15.5864	15.9899	16.4439	16.7333
196	320.4	15.9932	15.3047	15.5628	15.9712	16.4323	16.7198
195	320.5	15.9789	15.2959	15.5467	15.954	16.4215	16.7102
194	320.6	15.961	15.2752	15.5252	15.9331	16.4035	16.6962
193	320.7	15.9459	15.2534	15.5111	15.9179	16.393	16.6836
192	320.8	15.93	15.2386	15.4947	15.8991	16.3838	16.6788
191	320.9	15.9153	15.2174	15.4722	15.8808	16.3784	16.6722
190	321	15.8996	15.2041	15.4516	15.8647	16.3661	16.6624
189	321.1	15.8841	15.1854	15.4365	15.8464	16.3543	16.6527
188	321.2	15.8692	15.1632	15.4177	15.8295	16.3461	16.6453
187	321.3	15.8517	15.1412	15.4005	15.8094	16.3342	16.6356
186	321.4	15.8397	15.1292	15.3821	15.7962	16.3235	16.6253
185	321.5	15.8248	15.1091	15.3622	15.7779	16.3114	16.6174
184	321.6	15.8082	15.0933	15.3394	15.7599	16.2983	16.6103
183	321.7	15.7941	15.0694	15.3233	15.7459	16.2897	16.5992
182	321.8	15.7805	15.0469	15.3053	15.7286	16.2804	16.5979
181	321.9	15.7669	15.0288	15.2848	15.7126	16.2688	16.5896
180	322	15.7534	15.012	15.2644	15.6985	16.261	16.5884
179	322.1	15.7392	14.9919	15.2425	15.6839	16.2471	16.5827
178	322.2	15.7274	14.9744	15.2276	15.673	16.2368	16.5772
177	322.3	15.7146	14.9546	15.2103	15.6609	16.2287	16.5728
176	322.4	15.7028	14.9369	15.1956	15.6483	16.2148	16.569
175	322.5	15.6917	14.9167	15.1767	15.6383	16.2065	16.5684
174	322.6	15.6782	14.9006	15.1565	15.6252	16.1937	16.5636
173	322.7	15.6682	14.8803	15.1389	15.6151	16.1871	16.5613
172	322.8	15.6566	14.8607	15.1246	15.602	16.1781	16.5604
171	322.9	15.6469	14.8398	15.11	15.5919	16.1735	16.562
170	323	15.6378	14.8256	15.0975	15.5856	16.167	16.5646
169	323.1	15.6267	14.8138	15.0804	15.5756	16.1569	16.5582
168	323.2	15.6187	14.7962	15.0672	15.569	16.1504	16.5577
167	323.3	15.6103	14.7745	15.0554	15.5605	16.142	16.5669
166	323.4	15.6017	14.7569	15.04	15.5536	16.1358	16.5698
165	323.5	15.5962	14.7435	15.0322	15.5491	16.1288	16.569
164	323.6	15.587	14.7292	15.0189	15.5413	16.1201	16.5695
163	323.7	15.581	14.7158	15.0102	15.5344	16.1175	16.5741
162	323.8	15.5743	14.7055	15.0019	15.528	16.1134	16.5777
161	323.9	15.5683	14.6925	14.9913	15.5227	16.1069	16.5791
160	324	15.5631	14.6738	14.9819	15.5199	16.1019	16.5811
159	324.1	15.5583	14.6674	14.974	15.5151	16.0997	16.5839
158	324.2	15.5553	14.6543	14.9676	15.5135	16.0976	16.5891
157	324.3	15.552	14.6458	14.963	15.5113	16.0943	16.5883
156	324.4	15.5487	14.6379	14.9554	15.5077	16.0889	16.5936
155	324.5	15.544	14.6268	14.9506	15.5044	16.089	16.5956
154	324.6	15.5434	14.6151	14.9457	15.5038	16.0867	16.6009
153	324.7	15.5416	14.6079	14.9428	15.5038	16.0836	16.6057
152	324.8	15.5409	14.6018	14.9373	15.5014	16.0832	16.6164
151	324.9	15.5404	14.5947	14.9377	15.503	16.0815	16.6126
150	325	15.5421	14.593	14.9369	15.5057	16.0828	16.6183
149	325.1	15.5404	14.5824	14.9364	15.505	16.0827	16.6188
148	325.2	15.543	14.5801	14.9389	15.5062	16.087	16.6306
147	325.3	15.5436	14.5781	14.9375	15.5114	16.0859	16.6333
146	325.4	15.5474	14.5765	14.9415	15.5158	16.0886	16.6373
145	325.5	15.5489	14.5747	14.9441	15.5188	16.0889	16.639
144	325.6	15.555	14.5723	14.9494	15.5253	16.0957	16.6486
143	325.7	15.5564	14.5739	14.9526	15.5253	16.099	16.6427
142	325.8	15.5604	14.578	14.9558	15.5299	16.1071	16.6467
141	325.9	15.5656	14.5799	14.9606	15.5344	16.109	16.6545
140	326	15.5709	14.5846	14.9683	15.5411	16.1125	16.6504
139	326.1	15.5775	14.5893	14.9781	15.549	16.1197	16.6536
138	326.2	15.5856	14.6	14.9895	15.5582	16.1294	16.6624
137	326.3	15.5923	14.6042	14.998	15.5681	16.1333	16.6603
136	326.4	15.5991	14.6113	15.0051	15.5761	16.1385	16.6635
135	326.5	15.6093	14.6261	15.0162	15.5874	16.1469	16.6661
134	326.6	15.6157	14.6258	15.0226	15.5945	16.1519	16.6718
133	326.7	15.6269	14.6429	15.0393	15.6084	16.1619	16.6731
132	326.8	15.6367	14.6511	15.0534	15.621	16.169	16.678
131	326.9	15.6447	14.663	15.0669	15.6289	16.1757	16.6754
130	327	15.6581	14.6793	15.0813	15.6459	16.1855	16.6838
129	327.1	15.6685	14.6899	15.0942	15.6599	16.1942	16.6831
128	327.2	15.6817	14.709	15.1121	15.6735	16.204	16.6864
127	327.3	15.6935	14.7207	15.1244	15.6846	16.2187	16.6915
126	327.4	15.7084	14.7415	15.1427	15.7007	16.2304	16.6985
125	327.5	15.7191	14.7542	15.16	15.7159	16.2364	16.7009
124	327.6	15.7331	14.769	15.1763	15.7322	16.2476	16.7066
123	327.7	15.7478	14.7938	15.1962	15.7464	16.2603	16.7104
122	327.8	15.7633	14.8191	15.2136	15.7643	16.2716	16.7193
121	327.9	15.7789	14.839	15.2329	15.783	16.2836	16.7246
120	328	15.7943	14.8568	15.2532	15.7999	16.2933	16.7301
119	328.1	15.8109	14.885	15.2758	15.815	16.303	16.7376
118	328.2	15.8264	14.9144	15.2956	15.8325	16.3187	16.7411
117	328.3	15.8443	14.9403	15.3184	15.8547	16.3245	16.7455
116	328.4	15.8643	14.9712	15.3421	15.8765	16.3447	16.7526
115	328.5	15.8819	15.0038	15.3644	15.8964	16.3571	16.7556
114	328.6	15.9011	15.0322	15.3881	15.9169	16.3692	16.7675
113	328.7	15.9191	15.0642	15.413	15.9368	16.3792	16.7712
112	328.8	15.9389	15.1059	15.4362	15.9579	16.3899	16.7762
111	328.9	15.9595	15.1365	15.4614	15.9799	16.4066	16.7897
110	329	15.981	15.1721	15.4902	16.0054	16.4244	16.7976
109	329.1	16.0031	15.21	15.5171	16.0268	16.4382	16.8014
108	329.2	16.0249	15.2406	15.5431	16.05	16.4579	16.8039
107	329.3	16.0476	15.2911	15.5723	16.0713	16.4743	16.8248
106	329.4	16.0694	15.3228	15.601	16.0985	16.4863	16.8278
105	329.5	16.0926	15.3618	15.6308	16.1177	16.5035	16.8387
104	329.6	16.1162	15.4082	15.6642	16.1377	16.5203	16.8416
103	329.7	16.1423	15.4406	15.6991	16.1701	16.5426	16.85
102	329.8	16.1658	15.4858	15.7302	16.1929	16.5599	16.8575
101	329.9	16.1931	15.5262	15.7678	16.2165	16.58	16.871
100	330	16.2192	15.5698	15.8031	16.2421	16.5962	16.8782
99	330.1	16.2448	15.6125	15.8359	16.268	16.6171	16.8887
98	330.2	16.2722	15.6463	15.8733	16.2935	16.6407	16.9033
97	330.3	16.3002	15.7025	15.9101	16.3203	16.6618	16.9219
96	330.4	16.3264	15.7306	15.9454	16.3426	16.6806	16.9374
95	330.5	16.3575	15.7841	15.9865	16.3744	16.7016	16.9594
94	330.6	16.3863	15.8228	16.0257	16.4	16.7279	16.9734
93	330.7	16.4151	15.8572	16.0611	16.4267	16.7496	16.9863
92	330.8	16.4468	15.9083	16.1035	16.4579	16.7721	17.0057
91	330.9	16.4793	15.9444	16.1426	16.487	16.7958	17.0287
90	331	16.5102	15.99	16.1825	16.5149	16.8259	17.0487
89	331.1	16.544	16.026	16.2244	16.5466	16.8559	17.0714
88	331.2	16.5748	16.0683	16.2645	16.5766	16.8767	17.0894
87	331.3	16.6101	16.1159	16.3079	16.613	16.9042	17.1224
86	331.4	16.6441	16.1565	16.3477	16.6451	16.9324	17.1515
85	331.5	16.6774	16.2051	16.3871	16.6742	16.9597	17.1808
84	331.6	16.7142	16.2437	16.4274	16.7138	16.9886	17.2112
83	331.7	16.7516	16.295	16.4694	16.7506	17.0184	17.2467
82	331.8	16.7883	16.3278	16.5119	16.7861	17.056	17.2781
81	331.9	16.8256	16.3781	16.5521	16.8234	17.0861	17.3167
80	332	16.8654	16.4163	16.5965	16.8605	17.1287	17.3524
79	332.1	16.9046	16.4541	16.6366	16.8982	17.1658	17.3885
78	332.2	16.9456	16.5053	16.6794	16.9361	17.2069	17.434
77	332.3	16.9863	16.5334	16.7221	16.9751	17.2556	17.4724
76	332.4	17.0265	16.5763	16.759	17.0143	17.2968	17.5147
75	332.5	17.0688	16.6146	16.8069	17.0546	17.3448	17.5595
74	332.6	17.1125	16.6477	16.8435	17.0962	17.3911	17.5952
73	332.7	17.1538	16.682	16.8853	17.1364	17.4413	17.6514
72	332.8	17.1978	16.7182	16.9224	17.1786	17.4902	17.6887
71	332.9	17.2449	16.761	16.9619	17.2237	17.543	17.7588
70	333	17.2892	16.802	17.0035	17.2677	17.5919	17.8112
69	333.1	17.3343	16.8359	17.0376	17.3097	17.6434	17.8762
68	333.2	17.385	16.8842	17.0819	17.3605	17.6951	17.9468
67	333.3	17.4333	16.919	17.1172	17.4099	17.7542	18.0116
66	333.4	17.4826	16.9564	17.1586	17.4609	17.8032	18.0736
65	333.5	17.5307	17.0027	17.1981	17.5085	17.8642	18.1444
64	333.6	17.5838	17.0352	17.2362	17.5612	17.9254	18.2117
63	333.7	17.6349	17.0801	17.2779	17.6144	17.9833	18.2829
62	333.8	17.6868	17.1212	17.3188	17.6649	18.0461	18.3379
61	333.9	17.7395	17.1531	17.3584	17.7187	18.1012	18.4145
60	334	17.7908	17.2006	17.3985	17.7691	18.1673	18.4889
59	334.1	17.8454	17.2313	17.4376	17.8217	18.2282	18.5688
58	334.2	17.9018	17.278	17.4864	17.8788	18.2912	18.6428
57	334.3	17.9575	17.3159	17.5248	17.933	18.3631	18.7216
56	334.4	18.0157	17.3539	17.5689	17.9916	18.4283	18.8065
55	334.5	18.0721	17.4007	17.6124	18.0464	18.4967	18.8872
54	334.6	18.1319	17.4334	17.6579	18.1063	18.5668	18.9788
53	334.7	18.1912	17.4776	17.7066	18.162	18.6395	19.0596
52	334.8	18.2509	17.5156	17.747	18.2203	18.7104	19.1456
51	334.9	18.3119	17.5553	17.7958	18.2778	18.7849	19.2415
50	335	18.3743	17.6005	17.8372	18.3378	18.8638	19.3269
49	335.1	18.4354	17.635	17.8899	18.3941	18.9349	19.427
48	335.2	18.4998	17.6798	17.9351	18.4551	19.0175	19.522
47	335.3	18.5616	17.7191	17.9852	18.5131	19.0937	19.6161
46	335.4	18.6277	17.76	18.0318	18.576	19.1773	19.7136
45	335.5	18.6932	17.8122	18.0876	18.6396	19.2576	19.8083
44	335.6	18.7568	17.844	18.1326	18.6979	19.3378	19.9104
43	335.7	18.8268	17.8948	18.1873	18.7645	19.4308	20.0101
42	335.8	18.8927	17.9294	18.2352	18.831	19.5118	20.1116
41	335.9	18.9584	17.9713	18.2861	18.8915	19.5962	20.2091
40	336	19.0288	18.0182	18.3382	18.9593	19.6845	20.3061
39	336.1	19.0988	18.0606	18.395	19.026	19.7771	20.4113
38	336.2	19.1674	18.1067	18.4427	19.0933	19.8681	20.5209
37	336.3	19.2391	18.1443	18.5	19.1601	19.96	20.6273
36	336.4	19.3094	18.1915	18.5545	19.2227	20.0573	20.7317
35	336.5	19.3843	18.2406	18.6131	19.2926	20.1504	20.8377
34	336.6	19.4547	18.2832	18.6657	19.361	20.2384	20.9357
33	336.7	19.526	18.3262	18.7219	19.4283	20.3353	21.0416
32	336.8	19.5992	18.3727	18.777	19.493	20.4269	21.1517
31	336.9	19.6757	18.423	18.8406	19.5703	20.5244	21.2557
30	337	19.7513	18.4732	18.8971	19.6411	20.6219	21.367
29	337.1	19.8262	18.5202	18.9541	19.7142	20.7192	21.477
28	337.2	19.9025	18.5708	19.0164	19.7862	20.8232	21.577
27	337.3	19.9769	18.6182	19.0702	19.8541	20.9227	21.6961
26	337.4	20.0558	18.6689	19.1365	19.9253	21.0256	21.8033
25	337.5	20.1306	18.7178	19.1969	19.9971	21.1253	21.917
24	337.6	20.2093	18.7612	19.2531	20.0738	21.2242	22.028
23	337.7	20.2883	18.8198	19.3193	20.1487	21.3324	22.1485
22	337.8	20.3658	18.8631	19.3749	20.2225	21.437	22.2602
21	337.9	20.4444	18.9189	19.439	20.2936	21.5357	22.3712
20	338	20.5235	18.9663	19.5052	20.3693	21.641	22.4776
19	338.1	20.6047	19.0253	19.5669	20.4528	21.7416	22.5901
18	338.2	20.6824	19.0699	19.631	20.5207	21.8415	22.7012
17	338.3	20.7643	19.1323	19.6943	20.5987	21.9482	22.8169
16	338.4	20.8435	19.1734	19.7566	20.6778	22.0538	22.9264
15	338.5	20.9251	19.2359	19.8283	20.757	22.1608	23.0446
14	338.6	21.0072	19.2916	19.8949	20.8316	22.2676	23.1582
13	338.7	21.0873	19.3515	19.9586	20.9092	22.3739	23.2617
12	338.8	21.1676	19.403	20.0261	20.9843	22.4769	23.3727
11	338.9	21.252	19.4633	20.0918	21.0683	22.5917	23.4924
10	339	21.3316	19.5218	20.1609	21.1427	22.6969	23.6012
9	339.1	21.4111	19.5797	20.2251	21.2176	22.7961	23.7078
8	339.2	21.4933	19.6392	20.2927	21.3003	22.8952	23.8095
7	339.3	21.5746	19.6881	20.3593	21.3752	23.0017	23.9291
6	339.4	21.6591	19.7555	20.4284	21.4579	23.1088	24.0407
5	339.5	21.7396	19.8104	20.4949	21.539	23.2085	24.1478
4	339.6	21.8235	19.8779	20.5665	21.6161	23.3127	24.2602
3	339.7	21.9061	19.9387	20.6267	21.6932	23.4259	24.3704
2	339.8	21.9866	19.9971	20.6932	21.7719	23.5271	24.4794
1	339.9	22.0669	20.0607	20.7626	21.8492	23.621	24.5813
0	340	22.1519	20.1248	20.8345	21.9317	23.7252	24.6968

## Sheet: d11Bsw
	age	mean	5	16	50	84	95
750	265	27.2198	25.7771	26.313	27.1409	28.2236	28.7583
749	265.1	27.2651	25.8229	26.3619	27.1899	28.2681	28.7977
748	265.2	27.3094	25.8747	26.4127	27.2317	28.3063	28.8342
747	265.3	27.3524	25.9203	26.4551	27.2796	28.3458	28.873
746	265.4	27.3943	25.9715	26.5051	27.3188	28.3819	28.9094
745	265.5	27.4351	26.0092	26.5453	27.3607	28.4168	28.9445
744	265.6	27.4747	26.0596	26.5899	27.4035	28.4556	28.9797
743	265.7	27.5132	26.0924	26.6313	27.4389	28.4877	29.0156
742	265.8	27.5506	26.1394	26.6726	27.4795	28.5213	29.0439
741	265.9	27.5867	26.1809	26.7104	27.5149	28.5556	29.0742
740	266	27.6219	26.2166	26.7495	27.5492	28.5885	29.1132
739	266.1	27.6559	26.2592	26.7857	27.5859	28.6179	29.1364
738	266.2	27.6888	26.2924	26.8204	27.6192	28.6458	29.1638
737	266.3	27.7207	26.3234	26.8576	27.6508	28.6796	29.1938
736	266.4	27.7514	26.3651	26.8889	27.6836	28.7071	29.222
735	266.5	27.7811	26.3971	26.9194	27.7099	28.7294	29.2448
734	266.6	27.8097	26.4206	26.9531	27.7412	28.7562	29.27
733	266.7	27.8372	26.4541	26.9815	27.7689	28.7829	29.294
732	266.8	27.8638	26.4858	27.0085	27.7968	28.8098	29.321
731	266.9	27.8892	26.5103	27.041	27.8219	28.8258	29.3389
730	267	27.9137	26.536	27.067	27.8456	28.8472	29.3614
729	267.1	27.9371	26.5659	27.0877	27.8705	28.8706	29.3822
728	267.2	27.9596	26.5922	27.113	27.894	28.8945	29.4053
727	267.3	27.9812	26.612	27.1388	27.9147	28.9156	29.422
726	267.4	28.0017	26.6331	27.1597	27.9359	28.9274	29.44
725	267.5	28.0213	26.6545	27.1819	27.9546	28.945	29.4544
724	267.6	28.04	26.6779	27.199	27.976	28.9637	29.4752
723	267.7	28.0578	26.6993	27.2209	27.9946	28.9804	29.4902
722	267.8	28.0746	26.7136	27.2392	28.0093	28.9996	29.5027
721	267.9	28.0906	26.7326	27.2564	28.0273	29.0133	29.5159
720	268	28.1057	26.7462	27.2734	28.0399	29.0228	29.5294
719	268.1	28.1201	26.7615	27.2894	28.0551	29.0341	29.5437
718	268.2	28.1334	26.7799	27.3032	28.0707	29.045	29.5529
717	268.3	28.1461	26.7944	27.3148	28.0834	29.0599	29.564
716	268.4	28.1579	26.8067	27.3285	28.0967	29.0701	29.5755
715	268.5	28.169	26.8189	27.3408	28.1065	29.0817	29.5896
714	268.6	28.1793	26.8293	27.3507	28.1155	29.0929	29.5978
713	268.7	28.1888	26.8392	27.362	28.1256	29.1007	29.6018
712	268.8	28.1976	26.8473	27.3737	28.1346	29.1093	29.6098
711	268.9	28.2057	26.8561	27.3821	28.1431	29.1141	29.6171
710	269	28.2132	26.8637	27.3905	28.1515	29.1209	29.6239
709	269.1	28.22	26.8724	27.3976	28.1575	29.1257	29.6279
708	269.2	28.2261	26.8788	27.4041	28.1651	29.13	29.6366
707	269.3	28.2317	26.8873	27.4093	28.1713	29.1355	29.6427
706	269.4	28.2366	26.8899	27.4146	28.1752	29.1392	29.6461
705	269.5	28.241	26.8953	27.4184	28.1805	29.1445	29.6492
704	269.6	28.2447	26.9037	27.421	28.1839	29.1478	29.6508
703	269.7	28.248	26.9094	27.4244	28.187	29.1508	29.6537
702	269.8	28.2507	26.9111	27.4272	28.1899	29.1533	29.657
701	269.9	28.2529	26.9138	27.4312	28.1924	29.1553	29.6587
700	270	28.2547	26.9169	27.4336	28.1948	29.1571	29.6607
699	270.1	28.256	26.9171	27.4345	28.1965	29.1585	29.6617
698	270.2	28.2569	26.9175	27.4353	28.1977	29.1596	29.6621
697	270.3	28.2573	26.9176	27.4357	28.1981	29.1601	29.6629
696	270.4	28.2574	26.9176	27.4359	28.1981	29.1601	29.6629
695	270.5	28.257	26.9176	27.4354	28.1979	29.1596	29.6629
694	270.6	28.2564	26.9174	27.4349	28.1969	29.1588	29.6617
693	270.7	28.2553	26.9169	27.4343	28.1958	29.1575	29.6614
692	270.8	28.254	26.9163	27.4326	28.1937	29.1563	29.6597
691	270.9	28.2524	26.9137	27.4305	28.1919	29.1547	29.6584
690	271	28.2506	26.9111	27.4272	28.1899	29.1531	29.6566
689	271.1	28.2485	26.9096	27.425	28.1878	29.152	29.654
688	271.2	28.2462	26.9072	27.4222	28.1847	29.1492	29.6522
687	271.3	28.2436	26.9015	27.4199	28.183	29.1466	29.6504
686	271.4	28.2409	26.8953	27.4184	28.1805	29.1445	29.6492
685	271.5	28.2381	26.8907	27.4156	28.1773	29.1411	29.6481
684	271.6	28.235	26.889	27.4127	28.1742	29.138	29.6444
683	271.7	28.2319	26.8873	27.4096	28.1713	29.1358	29.6427
682	271.8	28.2286	26.8843	27.407	28.1681	29.1324	29.6395
681	271.9	28.2253	26.8788	27.4032	28.1637	29.1295	29.6358
680	272	28.2219	26.8745	27.3993	28.1596	29.1273	29.6309
679	272.1	28.2184	26.8699	27.3959	28.156	29.125	29.6267
678	272.2	28.215	26.8672	27.3912	28.1531	29.1213	29.6246
677	272.3	28.2115	26.861	27.389	28.1489	29.1182	29.6226
676	272.4	28.2079	26.8578	27.3846	28.1448	29.1162	29.62
675	272.5	28.2045	26.8538	27.3806	28.1417	29.1138	29.6164
674	272.6	28.2011	26.8508	27.3767	28.1384	29.1109	29.6125
673	272.7	28.1977	26.8473	27.3737	28.1346	29.1093	29.6098
672	272.8	28.1944	26.8432	27.3695	28.1304	29.1065	29.6078
671	272.9	28.1913	26.8411	27.365	28.1285	29.1019	29.6027
670	273	28.1882	26.8389	27.361	28.1249	29.1004	29.6018
669	273.1	28.1852	26.8368	27.3577	28.1214	29.0979	29.5993
668	273.2	28.1824	26.8343	27.3548	28.118	29.0954	29.5993
667	273.3	28.1798	26.8308	27.3511	28.1159	29.094	29.5979
666	273.4	28.1772	26.8274	27.3489	28.1138	29.09	29.5942
665	273.5	28.1749	26.8246	27.3466	28.1121	29.0867	29.5941
664	273.6	28.1727	26.8224	27.3438	28.1096	29.0851	29.5926
663	273.7	28.1709	26.8209	27.3428	28.1083	29.0829	29.5911
662	273.8	28.1691	26.8189	27.341	28.1065	29.082	29.5896
661	273.9	28.1677	26.818	27.3397	28.1055	29.081	29.5886
660	274	28.1665	26.8172	27.3378	28.1051	29.0805	29.5863
659	274.1	28.1655	26.8172	27.3362	28.104	29.0788	29.5837
658	274.2	28.1648	26.8162	27.3354	28.1038	29.0778	29.5831
657	274.3	28.1643	26.8161	27.3351	28.1032	29.0774	29.5825
656	274.4	28.1642	26.8159	27.3349	28.1032	29.0774	29.5825
655	274.5	28.1643	26.8161	27.3351	28.1032	29.0774	29.5825
654	274.6	28.1647	26.8162	27.3354	28.1038	29.0778	29.5831
653	274.7	28.1655	26.8172	27.3362	28.104	29.0788	29.5837
652	274.8	28.1665	26.8172	27.3378	28.1051	29.0805	29.5876
651	274.9	28.168	26.818	27.3399	28.1057	29.0811	29.5887
650	275	28.1696	26.8195	27.3414	28.1069	29.0821	29.5898
649	275.1	28.1717	26.8215	27.3435	28.1089	29.0843	29.5919
648	275.2	28.174	26.8243	27.3453	28.1109	29.0852	29.594
647	275.3	28.1767	26.8261	27.3485	28.1135	29.0896	29.5942
646	275.4	28.1799	26.8308	27.3518	28.1159	29.0941	29.5979
645	275.5	28.1833	26.8353	27.3558	28.1188	29.0967	29.5993
644	275.6	28.187	26.8377	27.3589	28.1233	29.0992	29.6009
643	275.7	28.1912	26.8411	27.365	28.1279	29.1019	29.6027
642	275.8	28.1957	26.8446	27.3715	28.1321	29.1082	29.6088
641	275.9	28.2006	26.8504	27.376	28.1378	29.1105	29.6116
640	276	28.2058	26.8561	27.3824	28.1431	29.1141	29.6171
639	276.1	28.2114	26.861	27.389	28.1489	29.1182	29.6226
638	276.2	28.2173	26.8699	27.3942	28.1546	29.1242	29.6267
637	276.3	28.2237	26.8759	27.4022	28.162	29.1286	29.6341
636	276.4	28.2304	26.8855	27.408	28.1699	29.1346	29.6408
635	276.5	28.2375	26.89	27.4149	28.1765	29.1402	29.6469
634	276.6	28.2448	26.9044	27.421	28.1839	29.1478	29.6508
633	276.7	28.2526	26.9137	27.4305	28.1922	29.1551	29.6587
632	276.8	28.2607	26.9216	27.4396	28.2006	29.1623	29.6657
631	276.9	28.2692	26.9288	27.4474	28.2079	29.1705	29.6723
630	277	28.2781	26.9377	27.4584	28.2167	29.1805	29.6837
629	277.1	28.2872	26.9467	27.4691	28.2255	29.1888	29.6901
628	277.2	28.2967	26.9564	27.4808	28.2351	29.1951	29.6958
627	277.3	28.3066	26.9645	27.4919	28.2457	29.2047	29.7067
626	277.4	28.3168	26.9773	27.5028	28.2574	29.2139	29.7154
625	277.5	28.3272	26.9912	27.5122	28.268	29.2219	29.7231
624	277.6	28.3381	27.0031	27.5235	28.2792	29.2309	29.7354
623	277.7	28.3493	27.0173	27.535	28.2909	29.2414	29.7452
622	277.8	28.3607	27.0304	27.5474	28.3011	29.2544	29.754
621	277.9	28.3724	27.0414	27.5611	28.3129	29.2649	29.7631
620	278	28.3845	27.0522	27.5741	28.3254	29.2759	29.7764
619	278.1	28.3969	27.0679	27.5897	28.3386	29.2866	29.787
618	278.2	28.4095	27.079	27.6024	28.3516	29.2967	29.794
617	278.3	28.4224	27.0985	27.6168	28.3643	29.3059	29.8089
616	278.4	28.4355	27.1104	27.6282	28.3783	29.3191	29.8183
615	278.5	28.449	27.1284	27.6417	28.3903	29.3315	29.8346
614	278.6	28.4626	27.14	27.6577	28.4056	29.3458	29.8449
613	278.7	28.4765	27.155	27.6729	28.4191	29.3579	29.8567
612	278.8	28.4906	27.1702	27.6895	28.4353	29.3719	29.8704
611	278.9	28.505	27.185	27.7055	28.4474	29.3829	29.88
610	279	28.5195	27.1985	27.7204	28.4639	29.3964	29.8932
609	279.1	28.5343	27.2218	27.7353	28.4787	29.4063	29.904
608	279.2	28.5492	27.2346	27.7503	28.4936	29.4203	29.9194
607	279.3	28.5645	27.2545	27.7676	28.5103	29.4345	29.9357
606	279.4	28.5797	27.2672	27.7847	28.5261	29.451	29.9492
605	279.5	28.5952	27.2848	27.8042	28.5398	29.465	29.9642
604	279.6	28.6108	27.2985	27.8188	28.556	29.4795	29.9738
603	279.7	28.6266	27.3215	27.8344	28.5733	29.4929	29.9845
602	279.8	28.6425	27.3397	27.85	28.5898	29.5051	30
601	279.9	28.6586	27.3534	27.8684	28.6074	29.5193	30.0167
600	280	28.6747	27.371	27.8885	28.6225	29.5331	30.0313
599	280.1	28.691	27.3878	27.907	28.6368	29.5502	30.0454
598	280.2	28.7074	27.4067	27.9224	28.6541	29.5668	30.0623
597	280.3	28.7239	27.4285	27.9371	28.6718	29.5795	30.0726
596	280.4	28.7404	27.4456	27.9572	28.6892	29.5966	30.0879
595	280.5	28.757	27.4595	27.9746	28.7089	29.6086	30.1032
594	280.6	28.7737	27.481	27.9946	28.7236	29.6231	30.1188
593	280.7	28.7904	27.4976	28.0139	28.7383	29.6354	30.1353
592	280.8	28.8073	27.5162	28.0265	28.755	29.6559	30.1485
591	280.9	28.824	27.5385	28.0451	28.7737	29.6695	30.164
590	281	28.8409	27.5523	28.0643	28.7942	29.6862	30.1757
589	281.1	28.8577	27.5694	28.0839	28.8096	29.7017	30.1904
588	281.2	28.8747	27.5949	28.1019	28.8259	29.7151	30.2105
587	281.3	28.8916	27.6102	28.1204	28.8405	29.727	30.2246
586	281.4	28.9085	27.6279	28.1366	28.8582	29.744	30.2413
585	281.5	28.9254	27.646	28.1535	28.8773	29.7611	30.2514
584	281.6	28.9423	27.662	28.1762	28.8977	29.7778	30.2664
583	281.7	28.9591	27.6838	28.1938	28.9128	29.7924	30.2792
582	281.8	28.976	27.7057	28.2096	28.9284	29.8056	30.2957
581	281.9	28.9928	27.719	28.2295	28.9437	29.8202	30.3153
580	282	29.0096	27.7372	28.2442	28.9609	29.8357	30.3302
579	282.1	29.0263	27.7542	28.2629	28.9804	29.8502	30.3426
578	282.2	29.043	27.7741	28.2817	28.9976	29.8679	30.3555
577	282.3	29.0596	27.7955	28.2997	29.0151	29.8846	30.3669
576	282.4	29.0763	27.8101	28.3187	29.0295	29.8973	30.3842
575	282.5	29.0929	27.8248	28.3357	29.0449	29.9101	30.4023
574	282.6	29.1093	27.8439	28.3511	29.063	29.9274	30.4144
573	282.7	29.1257	27.8637	28.3702	29.081	29.9416	30.4329
572	282.8	29.1422	27.882	28.386	29.0977	29.9561	30.4444
571	282.9	29.1585	27.9022	28.4071	29.1146	29.9733	30.4572
570	283	29.1747	27.9163	28.4256	29.1304	29.9873	30.4701
569	283.1	29.1909	27.9284	28.4409	29.1457	29.9993	30.4884
568	283.2	29.2071	27.9491	28.4562	29.1622	30.0147	30.5
567	283.3	29.2231	27.9712	28.4745	29.1792	30.0303	30.5194
566	283.4	29.2391	27.988	28.4924	29.1978	30.044	30.5326
565	283.5	29.255	28.0067	28.509	29.2111	30.0577	30.5439
564	283.6	29.2709	28.0179	28.5274	29.2285	30.0744	30.5552
563	283.7	29.2868	28.0311	28.5433	29.2432	30.0891	30.5712
562	283.8	29.3025	28.0519	28.5574	29.26	30.1007	30.5875
561	283.9	29.3183	28.0733	28.5766	29.2746	30.1163	30.6
560	284	29.334	28.0889	28.5946	29.2932	30.1302	30.6161
559	284.1	29.3495	28.1076	28.6089	29.3069	30.1441	30.6295
558	284.2	29.3652	28.1204	28.6274	29.3223	30.1583	30.6434
557	284.3	29.3807	28.1343	28.642	29.3387	30.1729	30.651
556	284.4	29.3962	28.152	28.658	29.3541	30.1872	30.6699
555	284.5	29.4117	28.172	28.6762	29.3702	30.2003	30.6848
554	284.6	29.4272	28.1906	28.6972	29.3875	30.2169	30.6962
553	284.7	29.4427	28.2086	28.71	29.4033	30.2281	30.711
552	284.8	29.4582	28.218	28.7258	29.417	30.2435	30.7271
551	284.9	29.4736	28.2324	28.741	29.4317	30.2569	30.7372
550	285	29.4891	28.2505	28.7582	29.4486	30.2712	30.7503
549	285.1	29.5046	28.2687	28.7761	29.4654	30.2844	30.762
548	285.2	29.5201	28.2906	28.7938	29.4809	30.3	30.7813
547	285.3	29.5357	28.3034	28.8096	29.4982	30.3132	30.7948
546	285.4	29.5513	28.3155	28.8228	29.5118	30.3285	30.8075
545	285.5	29.5669	28.3337	28.84	29.5272	30.342	30.8213
544	285.6	29.5826	28.352	28.8582	29.5431	30.3569	30.8326
543	285.7	29.5984	28.3693	28.875	29.56	30.3718	30.8477
542	285.8	29.6143	28.3929	28.8931	29.5767	30.3846	30.86
541	285.9	29.6303	28.4034	28.91	29.5926	30.4	30.8755
540	286	29.6463	28.4167	28.9249	29.6091	30.414	30.8946
539	286.1	29.6625	28.4359	28.9424	29.6248	30.431	30.9075
538	286.2	29.6788	28.454	28.9606	29.6403	30.444	30.9229
537	286.3	29.6952	28.4728	28.9776	29.6578	30.4597	30.9336
536	286.4	29.7118	28.4936	28.9965	29.6777	30.4768	30.9471
535	286.5	29.7286	28.5056	29.0152	29.6926	30.489	30.9617
534	286.6	29.7455	28.521	29.032	29.709	30.5034	30.9801
533	286.7	29.7626	28.5406	29.0481	29.7259	30.5212	30.9955
532	286.8	29.7799	28.561	29.0676	29.7444	30.5376	31.0116
531	286.9	29.7974	28.5817	29.0875	29.7632	30.552	31.0259
530	287	29.8151	28.6	29.1058	29.7835	30.5673	31.0421
529	287.1	29.833	28.6144	29.1266	29.799	30.5851	31.0552
528	287.2	29.8513	28.6343	29.1446	29.8155	30.6003	31.0711
527	287.3	29.8698	28.6587	29.1602	29.8362	30.619	31.0891
526	287.4	29.8884	28.6783	29.1841	29.8547	30.6365	31.1079
525	287.5	29.9074	28.6973	29.2054	29.8779	30.6537	31.1227
524	287.6	29.9267	28.7165	29.2268	29.8957	30.6698	31.1406
523	287.7	29.9463	28.7352	29.2436	29.9124	30.6883	31.1563
522	287.8	29.9662	28.7624	29.2636	29.9346	30.7073	31.1734
521	287.9	29.9865	28.7808	29.2887	29.9561	30.7232	31.1915
520	288	30.007	28.8044	29.3115	29.9778	30.7452	31.2129
519	288.1	30.028	28.8226	29.3347	29.9973	30.7635	31.2301
518	288.2	30.0493	28.8473	29.3516	30.0175	30.7833	31.2511
517	288.3	30.0709	28.8713	29.3743	30.0404	30.802	31.2713
516	288.4	30.093	28.8946	29.4045	30.0645	30.8229	31.2871
515	288.5	30.1155	28.9191	29.4267	30.0883	30.843	31.3083
514	288.6	30.1383	28.9415	29.4494	30.11	30.8655	31.326
513	288.7	30.1616	28.9661	29.4687	30.1327	30.8864	31.3518
512	288.8	30.1853	28.9937	29.5013	30.1584	30.9061	31.3733
511	288.9	30.2094	29.0162	29.5249	30.1842	30.9271	31.3898
510	289	30.234	29.0422	29.5503	30.2075	30.9546	31.4094
509	289.1	30.259	29.0697	29.5747	30.233	30.9769	31.4383
508	289.2	30.2845	29.0982	29.6049	30.2588	30.9968	31.4649
507	289.3	30.3105	29.1218	29.6332	30.2877	31.0231	31.4837
506	289.4	30.3369	29.1527	29.6571	30.3136	31.0487	31.5008
505	289.5	30.3638	29.1837	29.6846	30.3415	31.0722	31.5271
504	289.6	30.3912	29.2073	29.7176	30.3689	31.0966	31.5606
503	289.7	30.4192	29.2409	29.7465	30.3989	31.1232	31.5816
502	289.8	30.4476	29.2712	29.7734	30.4249	31.1505	31.5989
501	289.9	30.4765	29.2982	29.8056	30.4567	31.1776	31.6289
500	290	30.506	29.33	29.8367	30.4866	31.2034	31.6625
499	290.1	30.536	29.3628	29.868	30.5156	31.2325	31.684
498	290.2	30.5665	29.3953	29.8994	30.5496	31.2602	31.7048
497	290.3	30.5975	29.4279	29.9326	30.5792	31.2886	31.7421
496	290.4	30.629	29.4626	29.9659	30.6108	31.3203	31.7727
495	290.5	30.6611	29.4926	30.0005	30.6461	31.3484	31.7936
494	290.6	30.6937	29.528	30.032	30.6772	31.3794	31.8236
493	290.7	30.7269	29.5641	30.068	30.7124	31.4119	31.861
492	290.8	30.7605	29.5991	30.1038	30.7478	31.4404	31.8856
491	290.9	30.7947	29.6356	30.1371	30.7808	31.4743	31.9188
490	291	30.8295	29.6726	30.1761	30.8176	31.509	31.9526
489	291.1	30.8648	29.7091	30.2102	30.8554	31.5386	31.9807
488	291.2	30.9007	29.7459	30.2493	30.8893	31.5733	32.0137
487	291.3	30.937	29.7855	30.2905	30.9285	31.6113	32.05
486	291.4	30.9739	29.8246	30.3245	30.9672	31.6429	32.0805
485	291.5	31.0113	29.8627	30.3626	31.0044	31.678	32.1154
484	291.6	31.0492	29.9035	30.4037	31.0433	31.7156	32.1528
483	291.7	31.0876	29.9425	30.4424	31.0835	31.7516	32.1834
482	291.8	31.1267	29.9851	30.483	31.1247	31.786	32.2194
481	291.9	31.1661	30.0266	30.5252	31.1635	31.8279	32.2584
480	292	31.2061	30.062	30.5638	31.2063	31.8642	32.2882
479	292.1	31.2465	30.1083	30.6085	31.2458	31.8995	32.3301
478	292.2	31.2875	30.1488	30.6469	31.2888	31.9437	32.3695
477	292.3	31.3288	30.1933	30.6925	31.3324	31.9797	32.3995
476	292.4	31.3707	30.2388	30.7357	31.3739	32.0186	32.4462
475	292.5	31.413	30.2835	30.7779	31.4198	32.0613	32.4805
474	292.6	31.4558	30.325	30.8237	31.4618	32.099	32.5212
473	292.7	31.499	30.3695	30.865	31.5086	32.1454	32.5624
472	292.8	31.5426	30.4119	30.9136	31.5512	32.184	32.5973
471	292.9	31.5866	30.4575	30.9548	31.598	32.2272	32.6413
470	293	31.6311	30.5091	31.0027	31.6433	32.2706	32.6787
469	293.1	31.6759	30.5526	31.0476	31.6893	32.3119	32.7217
468	293.2	31.7211	30.6059	31.0934	31.7369	32.3585	32.7652
467	293.3	31.7666	30.647	31.1412	31.7822	32.3974	32.8088
466	293.4	31.8126	30.6942	31.1854	31.83	32.4449	32.85
465	293.5	31.8588	30.7416	31.2337	31.876	32.4883	32.8893
464	293.6	31.9054	30.7885	31.28	31.9226	32.5345	32.9337
463	293.7	31.9522	30.8362	31.328	31.9714	32.5795	32.9755
462	293.8	31.9994	30.8866	31.3754	32.0193	32.624	33.0222
461	293.9	32.0467	30.9351	31.4242	32.0673	32.6718	33.0616
460	294	32.0943	30.9822	31.4733	32.1156	32.7163	33.1105
459	294.1	32.1422	31.0351	31.5205	32.1651	32.7638	33.1514
458	294.2	32.1903	31.0845	31.5671	32.2124	32.8094	33.197
457	294.3	32.2386	31.1368	31.6179	32.2619	32.8569	33.2414
456	294.4	32.287	31.1841	31.6631	32.3081	32.907	33.2876
455	294.5	32.3357	31.2355	31.7153	32.36	32.951	33.3309
454	294.6	32.3844	31.2835	31.7613	32.4063	33.0028	33.3775
453	294.7	32.4333	31.3353	31.8126	32.4582	33.0471	33.4211
452	294.8	32.4823	31.3826	31.8573	32.5064	33.0971	33.4712
451	294.9	32.5314	31.4342	31.91	32.5569	33.1448	33.5139
450	295	32.5805	31.4846	31.9553	32.6056	33.1912	33.5658
449	295.1	32.6297	31.5314	32.008	32.6556	33.2426	33.6039
448	295.2	32.6789	31.5846	32.0531	32.7056	33.2874	33.6579
447	295.3	32.7281	31.6314	32.1056	32.7546	33.3416	33.6966
446	295.4	32.7772	31.6837	32.1501	32.8046	33.3862	33.749
445	295.5	32.8264	31.7321	32.2037	32.8526	33.4381	33.7909
444	295.6	32.8754	31.7837	32.2472	32.9043	33.4842	33.8413
443	295.7	32.9244	31.8308	32.2994	32.9513	33.5354	33.8846
442	295.8	32.9733	31.8832	32.3434	33.0021	33.5833	33.9325
441	295.9	33.022	31.9281	32.3944	33.0502	33.6329	33.9792
440	296	33.0706	31.9809	32.4402	33.0991	33.6821	34.0239
439	296.1	33.1191	32.0248	32.4884	33.1479	33.7312	34.0698
438	296.2	33.1673	32.081	32.5356	33.1978	33.7801	34.1135
437	296.3	33.2154	32.1213	32.5825	33.2446	33.8259	34.1626
436	296.4	33.2633	32.1783	32.6287	33.2959	33.8762	34.2051
435	296.5	33.3108	32.2185	32.6756	33.3402	33.9246	34.2543
434	296.6	33.3582	32.2698	32.724	33.3895	33.9727	34.2925
433	296.7	33.4052	32.3127	32.7669	33.4358	34.0192	34.3462
432	296.8	33.4519	32.3617	32.8166	33.4835	34.0672	34.3846
431	296.9	33.4983	32.4071	32.8574	33.5282	34.1134	34.4349
430	297	33.5444	32.4528	32.9099	33.5751	34.1617	34.4763
429	297.1	33.5901	32.4993	32.9471	33.6183	34.2104	34.5194
428	297.2	33.6353	32.5421	32.9954	33.6659	34.2564	34.5667
427	297.3	33.6803	32.5913	33.0369	33.7075	34.3024	34.6057
426	297.4	33.7247	32.6273	33.083	33.7555	34.3475	34.6549
425	297.5	33.7689	32.6774	33.1238	33.7969	34.3951	34.6909
424	297.6	33.8125	32.7154	33.1678	33.8429	34.4415	34.7422
423	297.7	33.8557	32.7614	33.2085	33.8837	34.4843	34.7792
422	297.8	33.8982	32.8012	33.2487	33.9283	34.5298	34.8212
421	297.9	33.9404	32.8415	33.2922	33.971	34.5738	34.8662
420	298	33.9821	32.8848	33.3288	34.0122	34.616	34.9009
419	298.1	34.0232	32.9231	33.3719	34.0529	34.6585	34.9483
418	298.2	34.0638	32.9643	33.4105	34.0933	34.7025	34.9842
417	298.3	34.1038	33.0062	33.4486	34.1341	34.7431	35.0264
416	298.4	34.1432	33.0382	33.4878	34.1732	34.7831	35.0667
415	298.5	34.1821	33.0794	33.5258	34.2132	34.8252	35.1025
414	298.6	34.2204	33.1167	33.5636	34.2496	34.8642	35.1433
413	298.7	34.258	33.1515	33.6	34.2881	34.9056	35.1785
412	298.8	34.2951	33.1897	33.6364	34.3262	34.9423	35.2179
411	298.9	34.3314	33.2249	33.6713	34.3613	34.9803	35.2559
410	299	34.3673	33.2584	33.7051	34.3992	35.0191	35.2873
409	299.1	34.4024	33.2919	33.7406	34.4329	35.0551	35.3264
408	299.2	34.4368	33.3298	33.7742	34.4674	35.0923	35.3601
407	299.3	34.4706	33.3611	33.8072	34.5017	35.1261	35.3949
406	299.4	34.5038	33.3871	33.8378	34.5338	35.1628	35.428
405	299.5	34.5362	33.4277	33.8716	34.5687	35.1944	35.4603
404	299.6	34.568	33.4569	33.9035	34.6005	35.2287	35.4944
403	299.7	34.5991	33.4774	33.9295	34.6301	35.2627	35.5219
402	299.8	34.6294	33.5152	33.9612	34.6623	35.2922	35.5571
401	299.9	34.6591	33.5469	33.9927	34.6906	35.325	35.5866
400	300	34.688	33.5665	34.0192	34.7187	35.3554	35.6158
399	300.1	34.7163	33.5979	34.0438	34.7488	35.3847	35.6443
398	300.2	34.7439	33.6256	34.0728	34.7771	35.4134	35.6725
397	300.3	34.7707	33.6558	34.1013	34.8036	35.4412	35.7017
396	300.4	34.7969	33.6718	34.1231	34.8288	35.4693	35.729
395	300.5	34.8223	33.7006	34.1468	34.8562	35.4962	35.7547
394	300.6	34.847	33.7253	34.1717	34.8795	35.5204	35.7786
393	300.7	34.871	33.7519	34.1975	34.9051	35.5467	35.805
392	300.8	34.8944	33.7688	34.219	34.9266	35.571	35.829
391	300.9	34.9169	33.7893	34.2402	34.9511	35.5944	35.8513
390	301	34.9388	33.8144	34.2607	34.9735	35.6168	35.8728
389	301.1	34.96	33.8351	34.2811	34.9936	35.6392	35.8956
388	301.2	34.9805	33.8559	34.3038	35.0154	35.6598	35.9178
387	301.3	35.0003	33.872	34.3219	35.0334	35.6834	35.9373
386	301.4	35.0195	33.8877	34.3402	35.0544	35.7027	35.9564
385	301.5	35.038	33.9096	34.3571	35.072	35.7228	35.9771
384	301.6	35.0557	33.9268	34.3737	35.0896	35.7409	35.9935
383	301.7	35.0729	33.9456	34.3892	35.1086	35.7541	36.0147
382	301.8	35.0894	33.9615	34.4093	35.1232	35.7746	36.0307
381	301.9	35.1052	33.9723	34.4255	35.1394	35.7925	36.0452
380	302	35.1204	33.9864	34.4365	35.1561	35.8092	36.0626
379	302.1	35.135	34.0012	34.4509	35.1706	35.8243	36.0797
378	302.2	35.1489	34.0133	34.4629	35.1825	35.837	36.0925
377	302.3	35.1623	34.0273	34.4758	35.1975	35.8498	36.1059
376	302.4	35.175	34.043	34.4894	35.2102	35.8637	36.1202
375	302.5	35.1871	34.0544	34.5041	35.2222	35.876	36.1299
374	302.6	35.1987	34.0615	34.5156	35.2337	35.8889	36.1428
373	302.7	35.2098	34.0725	34.5256	35.2446	35.9021	36.1566
372	302.8	35.2203	34.0813	34.534	35.2556	35.9132	36.1692
371	302.9	35.2302	34.0908	34.5426	35.2654	35.9231	36.1801
370	303	35.2396	34.1053	34.5517	35.2746	35.9323	36.1883
369	303.1	35.2485	34.1092	34.559	35.2826	35.9409	36.1966
368	303.2	35.2569	34.118	34.5669	35.2917	35.9493	36.2049
367	303.3	35.2649	34.125	34.5751	35.3009	35.9579	36.2118
366	303.4	35.2723	34.1368	34.5822	35.3084	35.9662	36.2192
365	303.5	35.2794	34.1427	34.5929	35.3147	35.973	36.2271
364	303.6	35.2859	34.149	34.6003	35.3222	35.9802	36.2353
363	303.7	35.2921	34.1516	34.6061	35.3277	35.9862	36.2418
362	303.8	35.2979	34.1566	34.6104	35.3337	35.9942	36.2489
361	303.9	35.3033	34.161	34.6154	35.3386	36	36.2548
360	304	35.3082	34.1677	34.6191	35.3437	36.0051	36.2616
359	304.1	35.313	34.1713	34.6237	35.3489	36.0088	36.2668
358	304.2	35.3172	34.1737	34.6277	35.3523	36.014	36.271
357	304.3	35.3212	34.1765	34.631	35.3566	36.0174	36.2751
356	304.4	35.3249	34.1797	34.6342	35.3604	36.0215	36.2793
355	304.5	35.3283	34.1827	34.6381	35.3638	36.0248	36.2828
354	304.6	35.3314	34.1838	34.6408	35.3665	36.0283	36.287
353	304.7	35.3343	34.1897	34.6433	35.3687	36.031	36.2889
352	304.8	35.3369	34.1947	34.6448	35.3717	36.0348	36.2916
351	304.9	35.3394	34.198	34.6468	35.3735	36.0369	36.2936
350	305	35.3415	34.2	34.6489	35.3755	36.0381	36.2957
349	305.1	35.3435	34.2012	34.651	35.3772	36.0396	36.2976
348	305.2	35.3454	34.2036	34.6534	35.3794	36.042	36.2989
347	305.3	35.347	34.2047	34.6556	35.3812	36.0439	36.2997
346	305.4	35.3486	34.2054	34.6565	35.3823	36.0452	36.3007
345	305.5	35.3499	34.2066	34.6578	35.3839	36.0464	36.3013
344	305.6	35.3512	34.2067	34.6588	35.3848	36.0478	36.302
343	305.7	35.3524	34.2085	34.6594	35.3862	36.0489	36.3033
342	305.8	35.3535	34.2087	34.6604	35.3876	36.0506	36.3046
341	305.9	35.3546	34.2106	34.6609	35.3888	36.052	36.3065
340	306	35.3555	34.2117	34.6618	35.3902	36.0536	36.3071
339	306.1	35.3565	34.2137	34.6631	35.3915	36.0544	36.3087
338	306.2	35.3574	34.2143	34.6642	35.3928	36.0551	36.3096
337	306.3	35.3584	34.2155	34.6645	35.3942	36.0559	36.3108
336	306.4	35.3593	34.2161	34.6648	35.3949	36.0563	36.3115
335	306.5	35.3603	34.2163	34.6653	35.3958	36.0574	36.3115
334	306.6	35.3612	34.2167	34.666	35.3967	36.0581	36.3127
333	306.7	35.3623	34.2194	34.6669	35.398	36.06	36.3142
332	306.8	35.3633	34.22	34.6681	35.3998	36.0613	36.316
331	306.9	35.3645	34.2224	34.6693	35.4016	36.0627	36.3176
330	307	35.3656	34.2238	34.6715	35.4023	36.0643	36.3186
329	307.1	35.3669	34.2264	34.6725	35.4039	36.0654	36.3201
328	307.2	35.3684	34.2288	34.6745	35.4056	36.0666	36.322
327	307.3	35.3699	34.229	34.6762	35.4064	36.0687	36.3243
326	307.4	35.3715	34.2296	34.6773	35.4076	36.0706	36.3253
325	307.5	35.3734	34.2327	34.6805	35.409	36.0723	36.3278
324	307.6	35.3752	34.2331	34.683	35.4103	36.0749	36.3291
323	307.7	35.3772	34.2352	34.6845	35.4125	36.0768	36.3321
322	307.8	35.3794	34.2384	34.6881	35.4156	36.0787	36.3347
321	307.9	35.3818	34.239	34.6909	35.4184	36.0816	36.3371
320	308	35.3843	34.242	34.6938	35.4203	36.0837	36.3399
319	308.1	35.387	34.2442	34.697	35.4234	36.0873	36.3428
318	308.2	35.3898	34.2457	34.7013	35.4262	36.0898	36.3458
317	308.3	35.3929	34.2487	34.7039	35.4288	36.0928	36.3497
316	308.4	35.3962	34.2503	34.7054	35.4316	36.0961	36.3527
315	308.5	35.3995	34.2533	34.7079	35.4361	36.0994	36.3562
314	308.6	35.4031	34.2567	34.7109	35.4397	36.1023	36.3615
313	308.7	35.407	34.2617	34.7142	35.4432	36.1065	36.3655
312	308.8	35.411	34.2644	34.7176	35.4476	36.1112	36.3707
311	308.9	35.4151	34.2675	34.7204	35.451	36.1154	36.3739
310	309	35.4196	34.2717	34.7249	35.4561	36.1211	36.3775
309	309.1	35.4241	34.2769	34.7295	35.4601	36.1266	36.3827
308	309.2	35.429	34.2804	34.7339	35.4643	36.1307	36.3879
307	309.3	35.4339	34.2826	34.7393	35.468	36.1352	36.3915
306	309.4	35.4391	34.2895	34.7441	35.4723	36.1394	36.3966
305	309.5	35.4445	34.2954	34.7474	35.4777	36.1448	36.4023
304	309.6	35.4501	34.3012	34.7529	35.4846	36.1526	36.4095
303	309.7	35.4558	34.3069	34.7583	35.4907	36.157	36.4153
302	309.8	35.4618	34.3115	34.764	35.4978	36.1641	36.4239
301	309.9	35.468	34.3211	34.7709	35.5035	36.1717	36.4285
300	310	35.4742	34.3295	34.7769	35.5112	36.1789	36.4359
299	310.1	35.4808	34.3354	34.7856	35.5185	36.1852	36.4429
298	310.2	35.4874	34.3395	34.7928	35.5242	36.1924	36.4507
297	310.3	35.4942	34.3426	34.801	35.5308	36.1981	36.4576
296	310.4	35.5012	34.3512	34.8051	35.5385	36.207	36.4641
295	310.5	35.5083	34.3574	34.8118	35.5446	36.213	36.4721
294	310.6	35.5156	34.3636	34.8173	35.5511	36.2225	36.4777
293	310.7	35.523	34.3704	34.8236	35.5572	36.2297	36.4854
292	310.8	35.5305	34.3752	34.8308	35.5648	36.235	36.4948
291	310.9	35.5381	34.3825	34.8391	35.5729	36.2432	36.502
290	311	35.546	34.3922	34.8448	35.5807	36.2532	36.5113
289	311.1	35.5537	34.398	34.853	35.5881	36.26	36.5205
288	311.2	35.5616	34.4079	34.8604	35.5966	36.2685	36.5284
287	311.3	35.5697	34.4176	34.8688	35.6072	36.2776	36.5389
286	311.4	35.5778	34.4275	34.8775	35.6144	36.2861	36.5479
285	311.5	35.5859	34.4325	34.8876	35.6235	36.2951	36.5559
284	311.6	35.5941	34.4374	34.8952	35.6301	36.3058	36.5629
283	311.7	35.6023	34.445	34.9016	35.639	36.3132	36.5702
282	311.8	35.6106	34.4548	34.9099	35.6457	36.321	36.5796
281	311.9	35.6188	34.4624	34.9172	35.6533	36.3292	36.588
280	312	35.627	34.4683	34.9232	35.6612	36.3378	36.5971
279	312.1	35.6352	34.4733	34.9299	35.67	36.3459	36.6045
278	312.2	35.6434	34.4828	34.9381	35.6786	36.3531	36.6152
277	312.3	35.6516	34.491	34.946	35.688	36.3621	36.6248
276	312.4	35.6597	34.5006	34.9556	35.6959	36.3722	36.6337
275	312.5	35.6676	34.5089	34.9648	35.704	36.381	36.6426
274	312.6	35.6756	34.5183	34.971	35.7123	36.3902	36.6515
273	312.7	35.6833	34.5263	34.9783	35.7195	36.4	36.6593
272	312.8	35.6911	34.5302	34.9863	35.7271	36.4057	36.6673
271	312.9	35.6987	34.5368	34.994	35.7347	36.412	36.675
270	313	35.7061	34.5406	35.0023	35.7425	36.4194	36.6834
269	313.1	35.7134	34.5503	35.0086	35.7492	36.4284	36.6902
268	313.2	35.7206	34.557	35.014	35.7553	36.4369	36.6978
267	313.3	35.7275	34.564	35.0194	35.762	36.4416	36.7028
266	313.4	35.7342	34.5692	35.0228	35.7695	36.4493	36.7132
265	313.5	35.7407	34.5741	35.0284	35.7766	36.4577	36.7183
264	313.6	35.747	34.5807	35.0363	35.783	36.4644	36.7256
263	313.7	35.753	34.5881	35.0423	35.7887	36.4711	36.7327
262	313.8	35.7587	34.593	35.0488	35.7939	36.4773	36.7399
261	313.9	35.7643	34.6018	35.0575	35.8009	36.4836	36.7461
260	314	35.7694	34.6065	35.0622	35.8064	36.4886	36.7515
259	314.1	35.7743	34.6112	35.0664	35.8112	36.4941	36.757
258	314.2	35.7789	34.6147	35.0699	35.8154	36.4991	36.7635
257	314.3	35.7831	34.6193	35.0749	35.819	36.5035	36.767
256	314.4	35.787	34.6234	35.079	35.8226	36.5072	36.7713
255	314.5	35.7905	34.6254	35.0816	35.8257	36.5097	36.7755
254	314.6	35.7937	34.6273	35.0853	35.8291	36.5122	36.7781
253	314.7	35.7964	34.6295	35.0872	35.8319	36.5143	36.7801
252	314.8	35.7987	34.6311	35.0905	35.8354	36.517	36.7831
251	314.9	35.8006	34.6326	35.0918	35.8375	36.5178	36.7852
250	315	35.8022	34.6331	35.0936	35.839	36.5191	36.7883
249	315.1	35.8032	34.6339	35.0944	35.8402	36.5203	36.7896
248	315.2	35.8038	34.6343	35.0947	35.8405	36.5209	36.7907
247	315.3	35.8039	34.6343	35.0947	35.8405	36.5211	36.7908
246	315.4	35.8035	34.6341	35.0947	35.8403	36.5207	36.7904
245	315.5	35.8026	34.6331	35.094	35.8393	36.5196	36.7888
244	315.6	35.8013	34.633	35.093	35.8382	36.5179	36.7868
243	315.7	35.7994	34.6315	35.0914	35.8358	36.5172	36.784
242	315.8	35.7969	34.6295	35.0872	35.8329	36.5146	36.7808
241	315.9	35.794	34.6273	35.0857	35.8295	36.5124	36.7783
240	316	35.7904	34.6254	35.0816	35.8257	36.5097	36.7755
239	316.1	35.7864	34.6234	35.078	35.8222	36.5067	36.7706
238	316.2	35.7818	34.6192	35.0736	35.8174	36.5026	36.7654
237	316.3	35.7765	34.6114	35.0685	35.813	36.4969	36.7603
236	316.4	35.7708	34.6077	35.0637	35.8077	36.4903	36.7532
235	316.5	35.7644	34.6018	35.0575	35.8011	36.4836	36.7461
234	316.6	35.7574	34.5917	35.0471	35.793	36.4756	36.7385
233	316.7	35.7498	34.5839	35.0396	35.7863	36.4678	36.7287
232	316.8	35.7415	34.5747	35.0285	35.7771	36.4584	36.7189
231	316.9	35.7326	34.5676	35.0217	35.7679	36.4473	36.7114
230	317	35.7232	34.5607	35.0166	35.7574	36.4381	36.7007
229	317.1	35.7131	34.5503	35.0077	35.7489	36.4278	36.6899
228	317.2	35.7023	34.5386	34.9975	35.7382	36.415	36.6792
227	317.3	35.6909	34.5302	34.9861	35.7271	36.4057	36.6669
226	317.4	35.6789	34.5224	34.9753	35.7155	36.3941	36.6553
225	317.5	35.6662	34.5083	34.9631	35.7022	36.3796	36.6408
224	317.6	35.6529	34.4923	34.9476	35.6891	36.3638	36.6259
223	317.7	35.6389	34.478	34.9329	35.674	36.3498	36.609
222	317.8	35.6242	34.4663	34.9202	35.6589	36.3346	36.5957
221	317.9	35.6089	34.4527	34.9082	35.6445	36.3185	36.5779
220	318	35.5929	34.437	34.8951	35.6293	36.3045	36.5621
219	318.1	35.5762	34.4275	34.8752	35.6126	36.2845	36.5469
218	318.2	35.5589	34.4054	34.8574	35.5936	36.2657	36.5255
217	318.3	35.5409	34.386	34.8414	35.5766	36.2465	36.5054
216	318.4	35.5224	34.3691	34.823	35.5569	36.2294	36.4849
215	318.5	35.503	34.3521	34.8066	35.5404	36.2084	36.4665
214	318.6	35.4831	34.337	34.7883	35.5205	36.1872	36.445
213	318.7	35.4625	34.3127	34.7648	35.4983	36.1644	36.4239
212	318.8	35.4412	34.2908	34.7458	35.4739	36.1415	36.3992
211	318.9	35.4193	34.2713	34.7247	35.4558	36.1206	36.3775
210	319	35.3968	34.2507	34.7061	35.4329	36.0966	36.3533
209	319.1	35.3737	34.2327	34.6808	35.4093	36.0725	36.3279
208	319.2	35.3498	34.2066	34.6577	35.3837	36.0463	36.3013
207	319.3	35.3254	34.1797	34.635	35.361	36.0221	36.2795
206	319.4	35.3004	34.1583	34.6122	35.3362	35.9976	36.2517
205	319.5	35.2747	34.1388	34.5848	35.3108	35.9685	36.2229
204	319.6	35.2485	34.1092	34.559	35.2826	35.9409	36.1966
203	319.7	35.2216	34.0828	34.5346	35.2569	35.9146	36.171
202	319.8	35.1941	34.0584	34.5108	35.2291	35.8839	36.1381
201	319.9	35.1661	34.0329	34.4803	35.2027	35.8534	36.111
200	320	35.1376	34.0058	34.4539	35.1726	35.8265	36.0826
199	320.1	35.1084	33.9768	34.428	35.1425	35.7964	36.048
198	320.2	35.0788	33.949	34.3975	35.1137	35.7615	36.0197
197	320.3	35.0485	33.9172	34.3665	35.0825	35.7329	35.9898
196	320.4	35.0178	33.8862	34.3385	35.0527	35.7006	35.9552
195	320.5	34.9865	33.8625	34.3088	35.0213	35.6659	35.9247
194	320.6	34.9548	33.8304	34.2761	34.9886	35.6329	35.8917
193	320.7	34.9226	33.7933	34.2443	34.9562	35.6026	35.8567
192	320.8	34.8899	33.7658	34.2146	34.9233	35.5667	35.8226
191	320.9	34.8567	33.7357	34.184	34.8898	35.5303	35.7881
190	321	34.8231	33.7018	34.1476	34.8575	35.4973	35.755
189	321.1	34.7891	33.6682	34.1174	34.8217	35.4609	35.7195
188	321.2	34.7547	33.6389	34.084	34.7872	35.4239	35.683
187	321.3	34.7198	33.6006	34.0478	34.7526	35.3882	35.6489
186	321.4	34.6846	33.5646	34.0157	34.7153	35.3525	35.613
185	321.5	34.649	33.5362	33.9812	34.682	35.3153	35.5755
184	321.6	34.6131	33.4966	33.9444	34.6449	35.2771	35.5383
183	321.7	34.5769	33.4633	33.912	34.6089	35.238	35.504
182	321.8	34.5403	33.4309	33.8742	34.5726	35.2	35.4657
181	321.9	34.5035	33.3865	33.8375	34.5337	35.1624	35.4279
180	322	34.4664	33.3568	33.8017	34.4976	35.1222	35.3912
179	322.1	34.429	33.3224	33.7674	34.4592	35.0833	35.3519
178	322.2	34.3914	33.2804	33.7295	34.4228	35.0429	35.3136
177	322.3	34.3535	33.2467	33.6922	34.3843	35.0052	35.2757
176	322.4	34.3156	33.2092	33.6565	34.3461	34.9642	35.2375
175	322.5	34.2774	33.1719	33.6182	34.3094	34.9253	35.1983
174	322.6	34.239	33.135	33.58	34.2681	34.8828	35.1617
173	322.7	34.2005	33.0993	33.5429	34.2313	34.8437	35.1215
172	322.8	34.162	33.0597	33.5066	34.1924	34.8045	35.083
171	322.9	34.1233	33.0212	33.468	34.1527	34.7623	35.047
170	323	34.0846	32.985	33.4277	34.1153	34.7221	35.0005
169	323.1	34.0458	32.9459	33.3955	34.0754	34.6813	34.9699
168	323.2	34.007	32.9091	33.355	34.0369	34.6415	34.93
167	323.3	33.9682	32.871	33.3174	33.9959	34.6002	34.8872
166	323.4	33.9294	32.8305	33.2818	33.9594	34.5624	34.8557
165	323.5	33.8907	32.7936	33.2398	33.9203	34.5198	34.8132
164	323.6	33.8519	32.7588	33.2054	33.8803	34.4805	34.7747
163	323.7	33.8134	32.7154	33.1688	33.8438	34.4424	34.7428
162	323.8	33.7749	32.6811	33.1296	33.803	34.3993	34.6975
161	323.9	33.7365	32.6404	33.0921	33.7662	34.3605	34.6642
160	324	33.6984	32.6061	33.0539	33.7278	34.3238	34.6274
159	324.1	33.6604	32.5699	33.0183	33.6898	34.2826	34.5874
158	324.2	33.6226	32.5263	32.9819	33.6537	34.242	34.556
157	324.3	33.585	32.4956	32.9422	33.6116	34.2036	34.512
156	324.4	33.5477	32.4547	32.9128	33.5786	34.1653	34.4783
155	324.5	33.5107	32.4159	32.8707	33.5411	34.1296	34.4481
154	324.6	33.474	32.3874	32.8334	33.5019	34.0894	34.4041
153	324.7	33.4376	32.3465	32.8049	33.468	34.054	34.3743
152	324.8	33.4015	32.312	32.7623	33.4314	34.0158	34.3422
151	324.9	33.3658	32.2804	32.7299	33.3974	33.9798	34.301
150	325	33.3306	32.2385	32.6994	33.3607	33.9449	34.2721
149	325.1	33.2957	32.2061	32.6588	33.3238	33.9059	34.2398
148	325.2	33.2613	32.1754	32.6273	33.2932	33.8737	34.2036
147	325.3	33.2273	32.1352	32.5955	33.2571	33.8418	34.172
146	325.4	33.1939	32.1064	32.5601	33.2226	33.8024	34.1433
145	325.5	33.1609	32.0744	32.5273	33.1914	33.7729	34.1068
144	325.6	33.1285	32.0358	32.4997	33.1584	33.7399	34.0778
143	325.7	33.0967	32.0076	32.4654	33.1257	33.7043	34.0498
142	325.8	33.0654	31.9757	32.4349	33.0949	33.6765	34.0183
141	325.9	33.0349	31.9429	32.4061	33.0642	33.6458	33.9878
140	326	33.0048	31.9143	32.3754	33.0343	33.6164	33.9614
139	326.1	32.9754	31.8853	32.3461	33.004	33.5846	33.9349
138	326.2	32.9468	31.8544	32.3188	32.974	33.5564	33.9032
137	326.3	32.9188	31.8247	32.2918	32.9462	33.5295	33.8801
136	326.4	32.8916	31.8038	32.2633	32.9214	33.4996	33.8577
135	326.5	32.8651	31.7745	32.2366	32.8927	33.4746	33.8298
134	326.6	32.8394	31.748	32.2132	32.8652	33.4501	33.8005
133	326.7	32.8144	31.7178	32.1892	32.8411	33.428	33.7789
132	326.8	32.7903	31.6992	32.1637	32.8195	33.3992	33.7618
131	326.9	32.767	31.6759	32.1405	32.7932	33.3757	33.7386
130	327	32.7446	31.6517	32.1193	32.7687	33.3552	33.7137
129	327.1	32.723	31.628	32.101	32.7497	33.3363	33.6909
128	327.2	32.7023	31.607	32.0767	32.7286	33.314	33.6763
127	327.3	32.6826	31.5891	32.0567	32.7088	33.292	33.6623
126	327.4	32.6638	31.5704	32.0388	32.69	33.2755	33.6391
125	327.5	32.6459	31.5497	32.022	32.6701	33.2585	33.6218
124	327.6	32.629	31.5313	32.0073	32.6551	33.242	33.6017
123	327.7	32.6131	31.515	31.9898	32.6383	33.2264	33.5898
122	327.8	32.5982	31.503	31.9744	32.6234	33.211	33.5781
121	327.9	32.5843	31.4891	31.9596	32.6097	33.1962	33.5682
120	328	32.5716	31.4746	31.9467	32.5953	33.1818	33.5534
119	328.1	32.5598	31.4632	31.9368	32.5843	33.1716	33.5442
118	328.2	32.5492	31.4517	31.9254	32.5745	33.1631	33.5296
117	328.3	32.5396	31.443	31.9177	32.5663	33.1517	33.5206
116	328.4	32.5311	31.4335	31.9097	32.5568	33.1447	33.5137
115	328.5	32.5238	31.4253	31.904	32.549	33.1378	33.5047
114	328.6	32.5176	31.4185	31.8966	32.5414	33.1328	33.5006
113	328.7	32.5126	31.4146	31.8905	32.5365	33.127	33.4955
112	328.8	32.5088	31.4124	31.8867	32.5329	33.1236	33.4931
111	328.9	32.5061	31.4107	31.8843	32.5304	33.121	33.4904
110	329	32.5047	31.4084	31.8827	32.5283	33.1197	33.4899
109	329.1	32.5044	31.4084	31.882	32.5281	33.1197	33.4899
108	329.2	32.5055	31.4107	31.8835	32.5295	33.1208	33.4899
107	329.3	32.5077	31.4124	31.8855	32.5319	33.1225	33.4925
106	329.4	32.5112	31.4134	31.8884	32.535	33.1258	33.4941
105	329.5	32.5159	31.4176	31.8945	32.5395	33.1317	33.4982
104	329.6	32.522	31.4233	31.9024	32.5471	33.1363	33.504
103	329.7	32.5293	31.4316	31.9082	32.5553	33.1437	33.5112
102	329.8	32.5379	31.4409	31.9159	32.5637	33.15	33.519
101	329.9	32.5478	31.4497	31.9247	32.5734	33.1616	33.5272
100	330	32.5591	31.4615	31.9366	32.5835	33.1711	33.5436
99	330.1	32.5716	31.4746	31.9467	32.5953	33.1818	33.5534
98	330.2	32.5854	31.4898	31.9603	32.6107	33.1976	33.5696
97	330.3	32.6007	31.5048	31.977	32.6256	33.2135	33.5795
96	330.4	32.6173	31.5222	31.9954	32.6418	33.2319	33.5915
95	330.5	32.6352	31.5409	32.0134	32.6611	33.2486	33.6104
94	330.6	32.6545	31.5622	32.0298	32.6799	33.2651	33.6296
93	330.7	32.6751	31.5806	32.0493	32.7006	33.2837	33.6524
92	330.8	32.6971	31.6035	32.0712	32.723	33.3086	33.6723
91	330.9	32.7204	31.6252	32.0994	32.7472	33.3339	33.6884
90	331	32.7451	31.6524	32.1198	32.7695	33.3561	33.7137
89	331.1	32.7713	31.6806	32.1434	32.7983	33.3807	33.7424
88	331.2	32.7988	31.7074	32.1735	32.8263	33.4086	33.7681
87	331.3	32.8276	31.7335	32.2048	32.8538	33.4393	33.7915
86	331.4	32.8579	31.7674	32.2313	32.8847	33.4666	33.8207
85	331.5	32.8895	31.8021	32.2609	32.9188	33.498	33.8565
84	331.6	32.9225	31.829	32.2969	32.9494	33.5337	33.8837
83	331.7	32.9569	31.8672	32.3285	32.9838	33.5671	33.9134
82	331.8	32.9927	31.9057	32.3631	33.0214	33.6012	33.9519
81	331.9	33.0298	31.9369	32.4013	33.059	33.6405	33.9828
80	332	33.0684	31.9791	32.4375	33.0975	33.6808	34.0222
79	332.1	33.1082	32.0174	32.4767	33.1377	33.7188	34.0605
78	332.2	33.1494	32.0588	32.518	33.1795	33.7602	34.0983
77	332.3	33.192	32.1043	32.5584	33.2208	33.8012	34.1409
76	332.4	33.236	32.1449	32.6056	33.2658	33.849	34.1794
75	332.5	33.2813	32.1949	32.6478	33.311	33.8922	34.2238
74	332.6	33.328	32.236	32.6963	33.3579	33.9427	34.2703
73	332.7	33.376	32.2892	32.7386	33.4051	33.9881	34.3141
72	332.8	33.4254	32.3323	32.7903	33.4548	34.0425	34.3649
71	332.9	33.4761	32.3892	32.8353	33.5045	34.0915	34.4062
70	333	33.5281	32.4347	32.8908	33.5592	34.1473	34.4658
69	333.1	33.5815	32.4941	32.9394	33.6089	34.1994	34.5083
68	333.2	33.6361	32.5429	32.9963	33.6666	34.2568	34.5668
67	333.3	33.692	32.6	33.0475	33.7196	34.3161	34.62
66	333.4	33.7492	32.6554	33.1059	33.7786	34.374	34.675
65	333.5	33.8077	32.7122	33.1616	33.838	34.4363	34.735
64	333.6	33.8674	32.774	33.218	33.8949	34.4949	34.7908
63	333.7	33.9285	32.8293	33.2808	33.9589	34.5615	34.8554
62	333.8	33.9907	32.893	33.3372	34.0208	34.6253	34.9126
61	333.9	34.0542	32.9547	33.4019	34.0829	34.6915	34.9772
60	334	34.1188	33.0179	33.4647	34.1486	34.7582	35.0408
59	334.1	34.1846	33.0821	33.5282	34.2158	34.8281	35.1063
58	334.2	34.2517	33.1467	33.594	34.2822	34.8971	35.1742
57	334.3	34.3199	33.212	33.6617	34.3498	34.9695	35.2423
56	334.4	34.3893	33.2784	33.7281	34.4212	35.0407	35.3122
55	334.5	34.4598	33.3494	33.7972	34.4917	35.1164	35.3837
54	334.6	34.5314	33.4234	33.8665	34.5643	35.1885	35.4554
53	334.7	34.6042	33.4856	33.9347	34.6357	35.2678	35.5283
52	334.8	34.678	33.5617	34.0099	34.7086	35.3434	35.6063
51	334.9	34.753	33.6365	34.0819	34.7856	35.4225	35.6813
50	335	34.8288	33.7057	34.1554	34.8632	35.5019	35.7601
49	335.1	34.9059	33.7786	34.2297	34.9381	35.5837	35.8416
48	335.2	34.9839	33.8583	34.3064	35.0185	35.663	35.9217
47	335.3	35.0629	33.9318	34.3808	35.0971	35.7465	36
46	335.4	35.1429	34.0101	34.4588	35.1762	35.8314	36.0863
45	335.5	35.2238	34.0854	34.5364	35.2591	35.9166	36.1734
44	335.6	35.3056	34.1631	34.6177	35.3412	36.0013	36.2569
43	335.7	35.3885	34.2444	34.699	35.425	36.0879	36.3445
42	335.8	35.4722	34.3274	34.7754	35.5085	36.1768	36.4341
41	335.9	35.5568	34.4006	34.8558	35.5918	36.2635	36.5231
40	336	35.6421	34.4816	34.9364	35.6771	36.3522	36.6135
39	336.1	35.7284	34.5653	35.0198	35.7628	36.4423	36.7031
38	336.2	35.8154	34.6462	35.1048	35.8511	36.5334	36.7997
37	336.3	35.9033	34.7291	35.1899	35.9397	36.6259	36.894
36	336.4	35.9919	34.8153	35.2738	36.028	36.7212	36.9902
35	336.5	36.0811	34.9011	35.3561	36.1157	36.815	37.087
34	336.6	36.1712	34.9817	35.4384	36.2059	36.9069	37.1852
33	336.7	36.2619	35.0659	35.5265	36.2947	37.0021	37.2858
32	336.8	36.3533	35.1524	35.6151	36.3838	37.0984	37.386
31	336.9	36.4453	35.2392	35.7018	36.4758	37.1956	37.4897
30	337	36.5379	35.3243	35.7865	36.5673	37.2956	37.5923
29	337.1	36.6311	35.418	35.8747	36.6586	37.3935	37.6976
28	337.2	36.725	35.5049	35.9655	36.7499	37.4918	37.8041
27	337.3	36.8193	35.593	36.0528	36.8427	37.5923	37.9079
26	337.4	36.9141	35.6826	36.1418	36.9357	37.692	38.0139
25	337.5	37.0093	35.772	36.2294	37.0288	37.7919	38.1244
24	337.6	37.1051	35.8581	36.319	37.1231	37.8933	38.2305
23	337.7	37.2013	35.9481	36.4095	37.2175	37.9939	38.3385
22	337.8	37.2979	36.0396	36.4991	37.3119	38.0961	38.4478
21	337.9	37.3949	36.132	36.5904	37.4054	38.1963	38.5593
20	338	37.4922	36.224	36.6798	37.4988	38.2995	38.6743
19	338.1	37.5899	36.3145	36.771	37.5934	38.4029	38.7856
18	338.2	37.6877	36.4067	36.8615	37.6895	38.5063	38.8966
17	338.3	37.786	36.5	36.9549	37.7851	38.6087	39.0107
16	338.4	37.8844	36.5857	37.0466	37.8818	38.7128	39.1251
15	338.5	37.983	36.6771	37.1389	37.9802	38.8171	39.2385
14	338.6	38.082	36.7711	37.2306	38.077	38.9212	39.3532
13	338.7	38.1809	36.8592	37.3233	38.1717	39.026	39.4621
12	338.8	38.28	36.9491	37.4152	38.2692	39.1326	39.5727
11	338.9	38.3793	37.0417	37.5073	38.3659	39.2363	39.6896
10	339	38.4785	37.1341	37.6003	38.4633	39.3423	39.813
9	339.1	38.5778	37.2264	37.6912	38.5621	39.4479	39.9258
8	339.2	38.6772	37.3145	37.7847	38.659	39.5529	40.0368
7	339.3	38.7766	37.4	37.8769	38.7547	39.6561	40.1525
6	339.4	38.8758	37.489	37.9675	38.8498	39.7602	40.2673
5	339.5	38.975	37.5781	38.0576	38.9457	39.8665	40.3853
4	339.6	39.0742	37.6681	38.147	39.0427	39.9718	40.4944
3	339.7	39.1732	37.7596	38.2401	39.14	40.0762	40.6108
2	339.8	39.272	37.8481	38.3317	39.2355	40.18	40.7293
1	339.9	39.3707	37.9379	38.4255	39.3308	40.2846	40.8449
0	340	39.4692	38.0252	38.5174	39.4262	40.3907	40.9572

## Sheet: pH
	age	mean	5	16	50	84	95
750	265	8.21757	8.09057	8.14276	8.22044	8.28598	8.33446
749	265.1	8.21555	8.08806	8.14027	8.21859	8.28393	8.33155
748	265.2	8.21326	8.08553	8.13839	8.2165	8.28136	8.32946
747	265.3	8.21142	8.08441	8.13668	8.21471	8.27942	8.3277
746	265.4	8.20921	8.08233	8.13376	8.21245	8.27743	8.32566
745	265.5	8.20751	8.08012	8.13198	8.21083	8.27571	8.32338
744	265.6	8.20536	8.0784	8.1298	8.20871	8.27351	8.32
743	265.7	8.20347	8.07656	8.12812	8.20698	8.27131	8.31828
742	265.8	8.20184	8.07513	8.12612	8.20537	8.26948	8.31689
741	265.9	8.19986	8.07283	8.1235	8.20343	8.26837	8.31486
740	266	8.19818	8.07138	8.12188	8.20178	8.26721	8.31331
739	266.1	8.19645	8.07005	8.12019	8.20003	8.26529	8.31132
738	266.2	8.19477	8.06762	8.11828	8.19876	8.26399	8.30993
737	266.3	8.19321	8.06662	8.11693	8.19714	8.26211	8.30745
736	266.4	8.19139	8.06439	8.1148	8.19537	8.26083	8.30553
735	266.5	8.18987	8.0628	8.11262	8.19402	8.25982	8.3045
734	266.6	8.18853	8.06094	8.11131	8.19286	8.25864	8.30307
733	266.7	8.18693	8.05993	8.1103	8.19116	8.25705	8.30056
732	266.8	8.18571	8.05821	8.10838	8.19007	8.25601	8.29957
731	266.9	8.18417	8.05675	8.10687	8.18824	8.25463	8.29818
730	267	8.18295	8.05541	8.10535	8.18693	8.25381	8.29745
729	267.1	8.18151	8.05363	8.10376	8.18573	8.2527	8.29629
728	267.2	8.18028	8.05256	8.1025	8.1844	8.25161	8.29466
727	267.3	8.179	8.05105	8.10102	8.18322	8.25051	8.29318
726	267.4	8.17796	8.04977	8.1	8.18217	8.24958	8.29231
725	267.5	8.17673	8.04857	8.09824	8.18095	8.24874	8.29164
724	267.6	8.17599	8.04798	8.09725	8.18037	8.24834	8.29105
723	267.7	8.17474	8.04652	8.09576	8.17899	8.24708	8.28969
722	267.8	8.17386	8.04543	8.09446	8.17822	8.24663	8.28904
721	267.9	8.17308	8.04484	8.09352	8.17745	8.24593	8.28811
720	268	8.17216	8.04439	8.0926	8.17669	8.24536	8.28768
719	268.1	8.17136	8.04374	8.09203	8.17574	8.24511	8.28708
718	268.2	8.17063	8.04263	8.09086	8.17503	8.24451	8.28661
717	268.3	8.17007	8.04228	8.09015	8.17426	8.24405	8.28574
716	268.4	8.16932	8.04162	8.08899	8.17356	8.24332	8.28569
715	268.5	8.16874	8.04118	8.08845	8.1727	8.24296	8.28551
714	268.6	8.16844	8.04118	8.08786	8.17252	8.24271	8.28545
713	268.7	8.16761	8.04068	8.08695	8.17168	8.24189	8.28466
712	268.8	8.16755	8.04045	8.08657	8.17154	8.24213	8.28466
711	268.9	8.16684	8.04037	8.08604	8.17085	8.24128	8.28409
710	269	8.16649	8.04009	8.08519	8.17066	8.24147	8.28357
709	269.1	8.16629	8.04022	8.08465	8.1702	8.24151	8.28413
708	269.2	8.16603	8.03978	8.08448	8.16983	8.24136	8.2842
707	269.3	8.16588	8.04028	8.08433	8.16969	8.24086	8.28387
706	269.4	8.16573	8.03993	8.08412	8.16948	8.24086	8.28421
705	269.5	8.16557	8.03978	8.08371	8.1695	8.24051	8.28377
704	269.6	8.16551	8.03949	8.08381	8.16934	8.2403	8.28369
703	269.7	8.16558	8.04005	8.08365	8.16903	8.24034	8.28419
702	269.8	8.16552	8.03929	8.08392	8.16905	8.24024	8.28407
701	269.9	8.16565	8.04024	8.08412	8.16913	8.24064	8.28442
700	270	8.16591	8.04036	8.08433	8.16922	8.24121	8.28491
699	270.1	8.16593	8.04044	8.08483	8.16913	8.24075	8.2844
698	270.2	8.16625	8.04088	8.08529	8.16921	8.24093	8.28466
697	270.3	8.16645	8.0409	8.08549	8.16951	8.24152	8.28511
696	270.4	8.16665	8.04202	8.08594	8.16954	8.24152	8.28532
695	270.5	8.16705	8.04226	8.08656	8.1697	8.24201	8.28556
694	270.6	8.16758	8.04273	8.08715	8.17006	8.24277	8.28608
693	270.7	8.16782	8.04366	8.08815	8.17018	8.24272	8.2858
692	270.8	8.16833	8.04424	8.0887	8.17087	8.24346	8.28622
691	270.9	8.16876	8.04448	8.089	8.17122	8.24382	8.28663
690	271	8.16927	8.04517	8.08983	8.1716	8.24433	8.287
689	271.1	8.16979	8.04601	8.09054	8.17196	8.24461	8.2874
688	271.2	8.17014	8.04652	8.09145	8.1724	8.24474	8.28754
687	271.3	8.17089	8.04768	8.09236	8.17293	8.2457	8.28809
686	271.4	8.17132	8.04825	8.09337	8.17318	8.24581	8.28828
685	271.5	8.17196	8.0493	8.09404	8.17366	8.24647	8.28899
684	271.6	8.17252	8.05006	8.09512	8.17444	8.24677	8.28897
683	271.7	8.17329	8.05042	8.09571	8.17485	8.24757	8.28995
682	271.8	8.17413	8.05189	8.0972	8.17574	8.24819	8.29027
681	271.9	8.17454	8.0524	8.09826	8.17606	8.2483	8.29035
680	272	8.17511	8.05374	8.09951	8.17644	8.24864	8.29099
679	272.1	8.17562	8.05452	8.1001	8.17693	8.24917	8.29071
678	272.2	8.17645	8.05531	8.1007	8.17761	8.24969	8.29139
677	272.3	8.17737	8.05623	8.10182	8.17848	8.25088	8.29189
676	272.4	8.17771	8.05717	8.1027	8.17879	8.25093	8.29144
675	272.5	8.17838	8.05814	8.10402	8.1793	8.25101	8.29199
674	272.6	8.17917	8.06021	8.10526	8.17991	8.25187	8.29221
673	272.7	8.1797	8.06076	8.10607	8.1804	8.25207	8.29245
672	272.8	8.18058	8.06176	8.10713	8.1813	8.25231	8.29239
671	272.9	8.18101	8.06234	8.10796	8.18167	8.25236	8.29232
670	273	8.18161	8.06301	8.10856	8.18213	8.25321	8.2931
669	273.1	8.18213	8.06376	8.1096	8.18284	8.25311	8.29281
668	273.2	8.18267	8.0647	8.11031	8.18316	8.25335	8.29329
667	273.3	8.18336	8.06609	8.11139	8.18378	8.25373	8.29342
666	273.4	8.18365	8.0665	8.11195	8.18428	8.25381	8.29303
665	273.5	8.18408	8.06738	8.11268	8.18459	8.25402	8.2928
664	273.6	8.18461	8.06846	8.11328	8.18516	8.25422	8.29327
663	273.7	8.18498	8.06947	8.11398	8.1856	8.2542	8.29299
662	273.8	8.18518	8.07022	8.11464	8.18579	8.25411	8.29248
661	273.9	8.18523	8.07027	8.11493	8.18572	8.25377	8.2924
660	274	8.18543	8.07135	8.11525	8.18596	8.25363	8.29222
659	274.1	8.18543	8.07194	8.11545	8.18592	8.25356	8.29169
658	274.2	8.18574	8.0725	8.11601	8.18614	8.2534	8.29222
657	274.3	8.18564	8.07254	8.11639	8.18623	8.25311	8.29141
656	274.4	8.18567	8.07285	8.11666	8.18624	8.25309	8.29119
655	274.5	8.18561	8.0731	8.11681	8.18628	8.25274	8.29076
654	274.6	8.18538	8.07322	8.11687	8.18613	8.25235	8.2904
653	274.7	8.18491	8.07274	8.11651	8.18584	8.25183	8.29
652	274.8	8.18446	8.07278	8.11639	8.18527	8.25094	8.2892
651	274.9	8.1842	8.07227	8.11622	8.18509	8.25031	8.28845
650	275	8.18373	8.07191	8.11575	8.18464	8.24974	8.28812
649	275.1	8.18307	8.07202	8.11559	8.18412	8.2487	8.28676
648	275.2	8.18226	8.07099	8.11462	8.18353	8.24806	8.28594
647	275.3	8.18151	8.07093	8.11422	8.18283	8.24697	8.285
646	275.4	8.18069	8.06994	8.11365	8.18211	8.24601	8.28423
645	275.5	8.17971	8.06931	8.11227	8.18102	8.2451	8.28326
644	275.6	8.17858	8.06841	8.11134	8.18024	8.24353	8.28232
643	275.7	8.17744	8.06714	8.11046	8.17918	8.24242	8.28098
642	275.8	8.17598	8.06566	8.10912	8.17759	8.24083	8.27894
641	275.9	8.17472	8.0644	8.10791	8.17646	8.23939	8.27773
640	276	8.17327	8.06303	8.10654	8.17543	8.23764	8.2761
639	276.1	8.17144	8.06156	8.10484	8.17349	8.23555	8.27455
638	276.2	8.16976	8.05946	8.1032	8.17202	8.23353	8.27273
637	276.3	8.16796	8.05733	8.10144	8.17016	8.23191	8.27065
636	276.4	8.16604	8.0556	8.09945	8.16841	8.22971	8.26888
635	276.5	8.16397	8.05344	8.09722	8.16629	8.22797	8.26715
634	276.6	8.16167	8.05134	8.0948	8.16421	8.22532	8.26436
633	276.7	8.15941	8.04779	8.09272	8.162	8.22317	8.2624
632	276.8	8.15687	8.04524	8.09008	8.15952	8.22073	8.25937
631	276.9	8.15443	8.04301	8.08755	8.15732	8.21838	8.25699
630	277	8.15164	8.04028	8.0838	8.15465	8.2158	8.25489
629	277.1	8.14892	8.03595	8.08152	8.15189	8.21303	8.25194
628	277.2	8.14594	8.03297	8.07755	8.14923	8.21009	8.2489
627	277.3	8.1429	8.0302	8.07455	8.14635	8.20741	8.24578
626	277.4	8.13965	8.02564	8.07114	8.14318	8.20434	8.24306
625	277.5	8.13625	8.02193	8.06738	8.13991	8.20105	8.23895
624	277.6	8.13295	8.01782	8.06392	8.13681	8.19771	8.23592
623	277.7	8.12937	8.01343	8.06021	8.13339	8.19457	8.23307
622	277.8	8.12574	8.00964	8.05601	8.12963	8.19136	8.22937
621	277.9	8.12196	8.00479	8.05199	8.12599	8.18774	8.22591
620	278	8.11806	8.00022	8.0482	8.12211	8.18399	8.22222
619	278.1	8.11417	7.99584	8.04352	8.11813	8.18032	8.21822
618	278.2	8.11004	7.9909	8.03948	8.11434	8.17671	8.215
617	278.3	8.1058	7.98526	8.03448	8.11011	8.17309	8.21069
616	278.4	8.10135	7.98017	8.03014	8.10566	8.16872	8.20655
615	278.5	8.09675	7.97484	8.02508	8.10099	8.16462	8.20282
614	278.6	8.09228	7.96938	8.02024	8.09663	8.16085	8.19843
613	278.7	8.08777	7.96422	8.01517	8.09224	8.1569	8.19493
612	278.8	8.08279	7.95803	8.00996	8.08711	8.15247	8.19042
611	278.9	8.07804	7.9525	8.00421	8.08257	8.14838	8.18668
610	279	8.07298	7.94646	7.99921	8.07739	8.14355	8.18217
609	279.1	8.06797	7.94099	7.99359	8.07253	8.13946	8.17819
608	279.2	8.06293	7.93452	7.98809	8.06718	8.13499	8.17435
607	279.3	8.0575	7.92814	7.98177	8.06209	8.13028	8.16907
606	279.4	8.05217	7.92163	7.97593	8.0568	8.12564	8.1656
605	279.5	8.04699	7.91504	7.97028	8.05166	8.12114	8.16198
604	279.6	8.04132	7.90903	7.9639	8.04616	8.11591	8.15645
603	279.7	8.03587	7.90169	7.95797	8.04062	8.111	8.15199
602	279.8	8.03016	7.89526	7.95174	8.03495	8.10615	8.14776
601	279.9	8.02451	7.88852	7.94535	8.02942	8.10107	8.14291
600	280	8.0187	7.88167	7.93893	8.02356	8.09605	8.13836
599	280.1	8.01288	7.875	7.93264	8.01787	8.09061	8.13364
598	280.2	8.00695	7.86772	7.92593	8.012	8.08528	8.1285
597	280.3	8.00093	7.86102	7.91926	8.00609	8.08003	8.12415
596	280.4	7.99491	7.85319	7.91245	7.99994	8.07483	8.11909
595	280.5	7.9888	7.84606	7.90574	7.99416	8.06933	8.11459
594	280.6	7.98281	7.83933	7.89923	7.98816	8.06408	8.10975
593	280.7	7.97653	7.83223	7.89223	7.98171	8.05825	8.10482
592	280.8	7.97031	7.82475	7.88524	7.97565	8.05269	8.09974
591	280.9	7.96426	7.81765	7.87864	7.96951	8.04771	8.09531
590	281	7.95786	7.8104	7.87132	7.96315	8.04203	8.09068
589	281.1	7.95166	7.80264	7.86441	7.95709	8.03612	8.08537
588	281.2	7.94531	7.79559	7.8577	7.95075	8.03051	8.08075
587	281.3	7.93894	7.78771	7.85054	7.94433	8.02497	8.07608
586	281.4	7.93246	7.78017	7.84289	7.93806	8.01917	8.07093
585	281.5	7.92633	7.7731	7.836	7.93149	8.01355	8.06624
584	281.6	7.91997	7.7655	7.82892	7.92528	8.00779	8.06178
583	281.7	7.91337	7.75822	7.82147	7.91872	8.00167	8.05664
582	281.8	7.90706	7.75055	7.81414	7.91225	7.99585	8.05127
581	281.9	7.90092	7.74386	7.80733	7.90587	7.99043	8.04716
580	282	7.89442	7.73576	7.79974	7.89922	7.98487	8.0419
579	282.1	7.88792	7.72742	7.79239	7.8929	7.97895	8.03733
578	282.2	7.88177	7.72127	7.78597	7.88667	7.97351	8.03228
577	282.3	7.8753	7.71317	7.77814	7.88012	7.9679	8.02687
576	282.4	7.8691	7.70559	7.77174	7.87378	7.96249	8.02233
575	282.5	7.86285	7.69828	7.76467	7.86775	7.95685	8.01756
574	282.6	7.85659	7.69093	7.75742	7.86104	7.95087	8.01281
573	282.7	7.8501	7.68319	7.75082	7.85493	7.94517	8.00795
572	282.8	7.84405	7.67554	7.7439	7.8486	7.94042	8.00288
571	282.9	7.83768	7.6692	7.73695	7.84237	7.93427	7.99767
570	283	7.83155	7.66152	7.73043	7.83599	7.92879	7.9931
569	283.1	7.82554	7.65363	7.72392	7.83005	7.92336	7.98896
568	283.2	7.81941	7.64703	7.71658	7.82381	7.91777	7.98345
567	283.3	7.81338	7.63974	7.71063	7.8178	7.91264	7.97882
566	283.4	7.80761	7.63239	7.70422	7.81228	7.90711	7.9742
565	283.5	7.80134	7.62444	7.69733	7.80583	7.90181	7.96903
564	283.6	7.79567	7.61864	7.69171	7.80039	7.89626	7.96391
563	283.7	7.78968	7.61124	7.68505	7.79408	7.89078	7.95887
562	283.8	7.78413	7.60455	7.67877	7.78848	7.88617	7.955
561	283.9	7.77833	7.59719	7.67255	7.78269	7.88043	7.9498
560	284	7.77266	7.59012	7.66645	7.77679	7.87575	7.9453
559	284.1	7.76698	7.58478	7.66049	7.77148	7.87021	7.9399
558	284.2	7.76143	7.57837	7.65469	7.76548	7.86516	7.93549
557	284.3	7.75611	7.57172	7.64869	7.7603	7.86055	7.9303
556	284.4	7.75086	7.56536	7.64348	7.75518	7.85568	7.92637
555	284.5	7.74527	7.55925	7.63723	7.74907	7.85048	7.92129
554	284.6	7.74025	7.55341	7.63209	7.74442	7.84581	7.91684
553	284.7	7.73511	7.54787	7.62692	7.73913	7.84111	7.91153
552	284.8	7.72989	7.54143	7.62105	7.73416	7.83614	7.90817
551	284.9	7.72531	7.53598	7.61629	7.72917	7.83203	7.90372
550	285	7.72013	7.53043	7.61097	7.7242	7.82731	7.89956
549	285.1	7.7156	7.52476	7.60614	7.71939	7.82284	7.89541
548	285.2	7.71055	7.51866	7.60075	7.71451	7.81839	7.89125
547	285.3	7.70621	7.51353	7.5956	7.70992	7.81432	7.88696
546	285.4	7.7016	7.50881	7.59122	7.70536	7.81018	7.88237
545	285.5	7.69733	7.50317	7.5865	7.70096	7.80623	7.87865
544	285.6	7.69313	7.49831	7.58148	7.69701	7.80248	7.87522
543	285.7	7.68901	7.49373	7.57762	7.69281	7.79851	7.87126
542	285.8	7.68493	7.4891	7.57308	7.68841	7.79473	7.86708
541	285.9	7.6811	7.48458	7.56927	7.68472	7.79158	7.86365
540	286	7.67752	7.48057	7.56527	7.68107	7.78776	7.85971
539	286.1	7.67367	7.4758	7.5613	7.67759	7.78427	7.85623
538	286.2	7.67008	7.47211	7.5571	7.67388	7.781	7.85194
537	286.3	7.66676	7.46812	7.55364	7.67077	7.77816	7.84911
536	286.4	7.66343	7.4646	7.55043	7.66731	7.77514	7.84585
535	286.5	7.66045	7.46122	7.54683	7.66446	7.77162	7.84286
534	286.6	7.65754	7.45761	7.54411	7.6617	7.7692	7.84051
533	286.7	7.6547	7.45471	7.5413	7.65908	7.76693	7.83731
532	286.8	7.65219	7.45167	7.53844	7.65613	7.76413	7.83439
531	286.9	7.64967	7.44963	7.53561	7.65395	7.76212	7.83188
530	287	7.64722	7.44675	7.5334	7.6515	7.75988	7.82937
529	287.1	7.64509	7.44476	7.53171	7.64956	7.75714	7.82667
528	287.2	7.64333	7.44274	7.52945	7.64793	7.75576	7.82464
527	287.3	7.64133	7.44073	7.52739	7.64618	7.75393	7.82232
526	287.4	7.63979	7.43939	7.52574	7.6447	7.75206	7.81992
525	287.5	7.63831	7.43798	7.5247	7.64351	7.75104	7.81828
524	287.6	7.63707	7.43671	7.52362	7.64234	7.74966	7.81669
523	287.7	7.63602	7.43568	7.52257	7.64113	7.74844	7.81596
522	287.8	7.63527	7.43553	7.5217	7.64028	7.74742	7.81424
521	287.9	7.63465	7.435	7.52103	7.63994	7.74691	7.81314
520	288	7.63419	7.43429	7.52011	7.63949	7.7464	7.81284
519	288.1	7.63396	7.43403	7.52026	7.63956	7.74602	7.81165
518	288.2	7.63376	7.43416	7.5204	7.63941	7.74526	7.81057
517	288.3	7.63403	7.43507	7.52074	7.63957	7.74548	7.81022
516	288.4	7.63449	7.43574	7.52128	7.64032	7.74557	7.80975
515	288.5	7.63511	7.43698	7.52193	7.64093	7.74599	7.81011
514	288.6	7.63603	7.43829	7.52306	7.64168	7.7468	7.81022
513	288.7	7.63723	7.43986	7.52464	7.64302	7.74763	7.81115
512	288.8	7.63848	7.44114	7.52637	7.64448	7.74855	7.81156
511	288.9	7.6399	7.4444	7.52789	7.6459	7.74948	7.81275
510	289	7.64196	7.44672	7.5301	7.64812	7.75105	7.81448
509	289.1	7.64379	7.44917	7.53251	7.65021	7.75248	7.81513
508	289.2	7.64624	7.45211	7.53564	7.65268	7.7548	7.81626
507	289.3	7.64872	7.45634	7.5381	7.6552	7.75713	7.8178
506	289.4	7.65144	7.45959	7.54147	7.65811	7.75907	7.819
505	289.5	7.65442	7.46304	7.54428	7.6611	7.76189	7.82226
504	289.6	7.65761	7.46736	7.54839	7.66418	7.76429	7.82425
503	289.7	7.66125	7.47129	7.55213	7.66796	7.76754	7.82626
502	289.8	7.66506	7.47703	7.5566	7.67191	7.77092	7.82922
501	289.9	7.66903	7.4817	7.56127	7.67548	7.77453	7.8325
500	290	7.67333	7.48744	7.5654	7.67976	7.77839	7.83551
499	290.1	7.67783	7.49301	7.57103	7.6846	7.78217	7.8385
498	290.2	7.68251	7.4992	7.57582	7.68891	7.78673	7.84233
497	290.3	7.6873	7.50488	7.58117	7.69372	7.79088	7.84606
496	290.4	7.69303	7.51148	7.58762	7.69947	7.79612	7.85054
495	290.5	7.69851	7.51892	7.5935	7.70479	7.80063	7.85511
494	290.6	7.70394	7.52533	7.59995	7.71015	7.80593	7.85849
493	290.7	7.70952	7.53221	7.60566	7.71565	7.81069	7.8638
492	290.8	7.71596	7.54	7.6127	7.72199	7.81705	7.86915
491	290.9	7.72234	7.54792	7.62	7.72826	7.82205	7.87384
490	291	7.72887	7.55638	7.62739	7.73493	7.82833	7.87948
489	291.1	7.73555	7.56448	7.63464	7.7413	7.83465	7.88482
488	291.2	7.7427	7.57358	7.6429	7.74844	7.84053	7.89023
487	291.3	7.75019	7.5827	7.65119	7.75574	7.84701	7.89654
486	291.4	7.75746	7.59176	7.65877	7.76295	7.85415	7.90284
485	291.5	7.76499	7.60116	7.66713	7.77049	7.86101	7.90889
484	291.6	7.77275	7.61052	7.67577	7.77823	7.86766	7.91512
483	291.7	7.78081	7.62082	7.68506	7.78605	7.87465	7.92237
482	291.8	7.78897	7.63034	7.69398	7.79406	7.88182	7.9288
481	291.9	7.79752	7.64042	7.70354	7.80253	7.8894	7.93631
480	292	7.80568	7.65071	7.71254	7.81075	7.89697	7.94316
479	292.1	7.81449	7.6613	7.72223	7.81937	7.90461	7.95049
478	292.2	7.82285	7.67137	7.732	7.82768	7.91173	7.95692
477	292.3	7.83192	7.68194	7.74217	7.83675	7.91969	7.96497
476	292.4	7.84084	7.69273	7.75196	7.84544	7.92792	7.97174
475	292.5	7.8499	7.70411	7.76202	7.85457	7.93596	7.97962
474	292.6	7.8589	7.71523	7.77198	7.86355	7.94361	7.98759
473	292.7	7.86827	7.72624	7.78257	7.87294	7.95172	7.99522
472	292.8	7.87758	7.73782	7.79296	7.882	7.95992	8.00262
471	292.9	7.88679	7.74905	7.80351	7.89104	7.96781	8.00995
470	293	7.89654	7.76072	7.81438	7.90061	7.97655	8.0184
469	293.1	7.90575	7.77215	7.82483	7.91002	7.98464	8.02648
468	293.2	7.91534	7.78302	7.8356	7.91923	7.99317	8.03438
467	293.3	7.92492	7.79521	7.84624	7.9287	8.00117	8.04193
466	293.4	7.93456	7.8075	7.8568	7.93809	8.00951	8.04986
465	293.5	7.9438	7.81845	7.86753	7.94712	8.01756	8.05807
464	293.6	7.95362	7.83082	7.8786	7.95686	8.02629	8.0668
463	293.7	7.96288	7.84199	7.88931	7.96597	8.03435	8.07413
462	293.8	7.97245	7.85321	7.89994	7.97543	8.04264	8.08216
461	293.9	7.98168	7.865	7.91044	7.98438	8.05035	8.08935
460	294	7.99097	7.87646	7.92107	7.99352	8.05877	8.09754
459	294.1	8.00002	7.88799	7.93155	8.00231	8.06659	8.10529
458	294.2	8.00932	7.89938	7.94208	8.01153	8.07485	8.11254
457	294.3	8.01864	7.91091	7.95269	8.02066	8.08263	8.11991
456	294.4	8.02753	7.92194	7.96292	8.02903	8.09011	8.12795
455	294.5	8.03645	7.93254	7.97289	8.03784	8.09814	8.13483
454	294.6	8.04495	7.9433	7.98288	8.04618	8.10565	8.14235
453	294.7	8.05341	7.9537	7.99238	8.05452	8.113	8.14932
452	294.8	8.06179	7.96378	8.00186	8.06286	8.11996	8.15632
451	294.9	8.07022	7.9746	8.01146	8.07124	8.12765	8.16288
450	295	8.07808	7.9846	8.02027	8.07845	8.13435	8.16942
449	295.1	8.08617	7.99439	8.02962	8.08639	8.14115	8.1766
448	295.2	8.09358	8.00352	8.03809	8.09376	8.14773	8.18271
447	295.3	8.10111	8.013	8.04657	8.10124	8.15422	8.18818
446	295.4	8.10842	8.022	8.05498	8.10848	8.16012	8.19524
445	295.5	8.11562	8.03118	8.06327	8.11508	8.1667	8.20066
444	295.6	8.12253	8.04022	8.07143	8.12207	8.17256	8.20668
443	295.7	8.12885	8.04833	8.07871	8.12816	8.17804	8.2117
442	295.8	8.13527	8.05604	8.08559	8.13429	8.18382	8.21719
441	295.9	8.14149	8.06401	8.09295	8.14052	8.18895	8.22183
440	296	8.14755	8.07152	8.09981	8.14626	8.19452	8.22688
439	296.1	8.15311	8.07836	8.10581	8.15194	8.1994	8.2312
438	296.2	8.15859	8.08508	8.11245	8.15689	8.20412	8.23627
437	296.3	8.16357	8.09131	8.1179	8.16183	8.20839	8.23996
436	296.4	8.16843	8.09733	8.12359	8.16658	8.21269	8.24417
435	296.5	8.17302	8.10296	8.12873	8.17089	8.21671	8.24789
434	296.6	8.17728	8.10806	8.13358	8.17505	8.22071	8.25138
433	296.7	8.18119	8.11281	8.13828	8.17872	8.22431	8.25496
432	296.8	8.18521	8.11774	8.14275	8.18271	8.2279	8.25799
431	296.9	8.18869	8.12212	8.14654	8.186	8.23102	8.26089
430	297	8.19191	8.12557	8.15056	8.18903	8.23434	8.26398
429	297.1	8.19486	8.12929	8.15372	8.19192	8.23681	8.26605
428	297.2	8.19753	8.1328	8.15696	8.19462	8.23899	8.2678
427	297.3	8.19996	8.13539	8.15974	8.19678	8.2416	8.26997
426	297.4	8.20188	8.13793	8.1621	8.19888	8.24336	8.27148
425	297.5	8.20383	8.14059	8.16401	8.20078	8.24524	8.2731
424	297.6	8.20535	8.14201	8.1657	8.20202	8.24674	8.27442
423	297.7	8.20672	8.14401	8.16757	8.2034	8.24793	8.2754
422	297.8	8.20759	8.14504	8.16865	8.20407	8.249	8.27598
421	297.9	8.20841	8.14608	8.16957	8.20483	8.24976	8.27633
420	298	8.20909	8.14678	8.17036	8.20551	8.25033	8.2767
419	298.1	8.20921	8.14721	8.17065	8.20563	8.25047	8.27688
418	298.2	8.2093	8.14733	8.17056	8.20565	8.25075	8.27676
417	298.3	8.2091	8.14698	8.17028	8.20543	8.25037	8.27634
416	298.4	8.20862	8.14653	8.16988	8.2048	8.24997	8.27564
415	298.5	8.20801	8.14596	8.16888	8.20424	8.24935	8.27513
414	298.6	8.20722	8.14484	8.16788	8.20352	8.24865	8.27413
413	298.7	8.20596	8.14321	8.16637	8.2023	8.24798	8.27348
412	298.8	8.20455	8.14214	8.16511	8.20081	8.24655	8.27164
411	298.9	8.20316	8.14102	8.1633	8.19939	8.24549	8.26978
410	299	8.20133	8.13905	8.16165	8.19772	8.24337	8.2683
409	299.1	8.19953	8.13612	8.15974	8.19609	8.24184	8.26725
408	299.2	8.19738	8.13405	8.15717	8.19397	8.23943	8.26523
407	299.3	8.19514	8.1319	8.15459	8.19172	8.2379	8.26342
406	299.4	8.19286	8.12935	8.15214	8.18949	8.23603	8.26155
405	299.5	8.19015	8.12602	8.14961	8.18693	8.23306	8.25885
404	299.6	8.18756	8.12302	8.14649	8.18452	8.23043	8.2567
403	299.7	8.18467	8.12032	8.14331	8.18134	8.22811	8.2546
402	299.8	8.18182	8.1162	8.14072	8.17868	8.22539	8.25194
401	299.9	8.17872	8.1129	8.13689	8.17556	8.2225	8.24925
400	300	8.17534	8.10996	8.1335	8.17213	8.2192	8.24656
399	300.1	8.17219	8.10554	8.13034	8.169	8.21631	8.24382
398	300.2	8.16886	8.10198	8.12657	8.16553	8.21335	8.24095
397	300.3	8.16546	8.09842	8.12278	8.16229	8.20972	8.23784
396	300.4	8.16207	8.09386	8.11935	8.15896	8.20686	8.23522
395	300.5	8.15838	8.09038	8.11517	8.15502	8.20353	8.23194
394	300.6	8.15477	8.0861	8.11145	8.15152	8.20018	8.22853
393	300.7	8.15088	8.08212	8.10744	8.14736	8.1965	8.22529
392	300.8	8.14706	8.07778	8.10324	8.14367	8.19293	8.22213
391	300.9	8.14356	8.07367	8.09957	8.14024	8.18975	8.21912
390	301	8.13968	8.07015	8.09531	8.13601	8.18623	8.21574
389	301.1	8.13596	8.0652	8.09113	8.1324	8.18286	8.21218
388	301.2	8.13194	8.06118	8.08683	8.12831	8.17882	8.20888
387	301.3	8.12815	8.05726	8.0829	8.12458	8.17546	8.20579
386	301.4	8.12449	8.05278	8.07884	8.12062	8.17238	8.20252
385	301.5	8.12073	8.04989	8.075	8.11713	8.16868	8.19934
384	301.6	8.11698	8.04458	8.07059	8.11304	8.16558	8.19615
383	301.7	8.11339	8.04092	8.06694	8.10953	8.16205	8.1932
382	301.8	8.10929	8.03642	8.06243	8.10545	8.15837	8.18938
381	301.9	8.10574	8.03283	8.05874	8.10175	8.15521	8.18658
380	302	8.10222	8.0287	8.05464	8.0983	8.15186	8.18337
379	302.1	8.09872	8.02515	8.05123	8.09464	8.14851	8.18062
378	302.2	8.09521	8.02093	8.04746	8.09138	8.1455	8.17762
377	302.3	8.0915	8.01763	8.04329	8.08744	8.14199	8.17416
376	302.4	8.0884	8.01328	8.03977	8.08445	8.13896	8.17162
375	302.5	8.08501	8.01015	8.03614	8.081	8.13604	8.16938
374	302.6	8.08173	8.00624	8.03245	8.07758	8.13336	8.16668
373	302.7	8.07844	8.00258	8.02882	8.07441	8.12983	8.16335
372	302.8	8.07547	7.99995	8.02569	8.07136	8.12719	8.16114
371	302.9	8.07233	7.99535	8.02207	8.06832	8.12483	8.15864
370	303	8.06943	7.99233	8.0189	8.06518	8.12205	8.1564
369	303.1	8.06665	7.9897	8.0159	8.06205	8.11932	8.15397
368	303.2	8.06367	7.98583	8.01257	8.05948	8.1169	8.1517
367	303.3	8.06111	7.98301	8.00994	8.05685	8.11486	8.14972
366	303.4	8.05843	7.98043	8.00679	8.05381	8.11218	8.14732
365	303.5	8.0559	7.97736	8.00405	8.0513	8.10976	8.14458
364	303.6	8.05362	7.97437	8.00176	8.04903	8.10809	8.14353
363	303.7	8.05119	7.97162	7.99921	8.04665	8.10542	8.14153
362	303.8	8.0489	7.9696	7.99646	8.04426	8.10332	8.13916
361	303.9	8.04664	7.96618	7.994	8.04185	8.10151	8.13781
360	304	8.0448	7.96401	7.99231	8.04003	8.09963	8.13627
359	304.1	8.0427	7.96185	7.99007	8.03812	8.09798	8.13447
358	304.2	8.0411	7.95926	7.98781	8.03648	8.09658	8.13361
357	304.3	8.03917	7.95742	7.98582	8.03457	8.09457	8.13167
356	304.4	8.03743	7.95496	7.98361	8.03284	8.0934	8.1306
355	304.5	8.03587	7.95304	7.98181	8.0314	8.09208	8.12942
354	304.6	8.03437	7.95131	7.98021	8.02989	8.09068	8.12856
353	304.7	8.03295	7.94936	7.97855	8.02872	8.08948	8.12744
352	304.8	8.03155	7.94764	7.97679	8.02741	8.08852	8.12713
351	304.9	8.03047	7.94636	7.97548	8.02625	8.08751	8.12667
350	305	8.02898	7.94426	7.97373	8.02487	8.08641	8.12546
349	305.1	8.02814	7.94286	7.97294	8.024	8.08575	8.12503
348	305.2	8.02687	7.9412	7.97134	8.02304	8.08452	8.1241
347	305.3	8.02614	7.94049	7.9704	8.02209	8.08403	8.12391
346	305.4	8.02522	7.93913	7.96942	8.02146	8.08319	8.12304
345	305.5	8.02455	7.93766	7.96831	8.02058	8.08296	8.1227
344	305.6	8.02373	7.93653	7.96732	8.01993	8.08207	8.12218
343	305.7	8.02299	7.93522	7.96651	8.01928	8.08132	8.12158
342	305.8	8.0225	7.9342	7.9656	8.0188	8.08107	8.12127
341	305.9	8.02183	7.93322	7.9647	8.01814	8.08071	8.12104
340	306	8.02153	7.93261	7.96446	8.01777	8.08053	8.12056
339	306.1	8.02106	7.93167	7.96378	8.01711	8.08039	8.12018
338	306.2	8.02072	7.9311	7.96323	8.01673	8.08036	8.12
337	306.3	8.02038	7.93044	7.96282	8.01631	8.08023	8.11977
336	306.4	8.01992	7.92902	7.96235	8.01583	8.07992	8.11964
335	306.5	8.01968	7.92856	7.96172	8.01546	8.07987	8.11995
334	306.6	8.01972	7.92829	7.96177	8.01544	8.08009	8.11942
333	306.7	8.01936	7.92787	7.96113	8.01495	8.08012	8.11962
332	306.8	8.01948	7.92777	7.96109	8.01498	8.08032	8.12025
331	306.9	8.01936	7.92712	7.96072	8.01486	8.08036	8.12019
330	307	8.01942	7.92696	7.96079	8.01475	8.08051	8.11995
329	307.1	8.01937	7.92687	7.96058	8.01481	8.0804	8.12063
328	307.2	8.01952	7.92663	7.96042	8.01492	8.08049	8.12096
327	307.3	8.01951	7.92642	7.96046	8.01499	8.0806	8.12058
326	307.4	8.01978	7.92677	7.9607	8.01505	8.08136	8.12116
325	307.5	8.01988	7.92672	7.96073	8.01518	8.08138	8.12153
324	307.6	8.01966	7.92631	7.96053	8.01497	8.0812	8.12147
323	307.7	8.02009	7.92668	7.96108	8.01549	8.08151	8.12179
322	307.8	8.02025	7.9274	7.96109	8.01559	8.0818	8.12168
321	307.9	8.02048	7.928	7.96118	8.0157	8.0819	8.12233
320	308	8.02062	7.92785	7.96151	8.01589	8.082	8.12244
319	308.1	8.02106	7.9283	7.96188	8.01631	8.08238	8.1229
318	308.2	8.02126	7.92915	7.96204	8.01665	8.08252	8.12291
317	308.3	8.02147	7.92966	7.96236	8.01698	8.08241	8.12304
316	308.4	8.02174	7.93	7.96273	8.01713	8.08279	8.12354
315	308.5	8.02183	7.93031	7.9627	8.01724	8.0827	8.12347
314	308.6	8.02226	7.93071	7.96318	8.01781	8.08291	8.12393
313	308.7	8.02232	7.93096	7.96353	8.01772	8.08322	8.12378
312	308.8	8.02286	7.93151	7.96414	8.01838	8.08373	8.1242
311	308.9	8.02295	7.93165	7.96411	8.01857	8.08409	8.1244
310	309	8.02346	7.93298	7.96502	8.01909	8.08414	8.12438
309	309.1	8.02366	7.93321	7.96537	8.0193	8.08415	8.12433
308	309.2	8.02384	7.93376	7.96569	8.01956	8.08409	8.12429
307	309.3	8.02424	7.93451	7.96608	8.01964	8.08464	8.12472
306	309.4	8.02455	7.93464	7.96655	8.01986	8.08473	8.12492
305	309.5	8.02476	7.93519	7.96714	8.0202	8.08465	8.12505
304	309.6	8.02508	7.93603	7.96783	8.0203	8.08469	8.12513
303	309.7	8.02529	7.93695	7.96826	8.02059	8.08447	8.12515
302	309.8	8.02551	7.93718	7.96865	8.02097	8.08473	8.12553
301	309.9	8.02576	7.9375	7.96919	8.02103	8.08483	8.12543
300	310	8.02613	7.93821	7.96989	8.02112	8.08509	8.1257
299	310.1	8.02623	7.93854	7.97035	8.02125	8.0851	8.12545
298	310.2	8.02659	7.93933	7.97098	8.02132	8.08514	8.12576
297	310.3	8.02674	7.93964	7.97128	8.02164	8.08515	8.12495
296	310.4	8.02689	7.94015	7.9716	8.02169	8.08536	8.12492
295	310.5	8.02721	7.9405	7.97211	8.02213	8.08517	8.1249
294	310.6	8.02726	7.94093	7.97224	8.02219	8.08503	8.12473
293	310.7	8.02734	7.9413	7.97259	8.02215	8.08483	8.12438
292	310.8	8.02761	7.94175	7.97288	8.02246	8.08508	8.12436
291	310.9	8.02767	7.94206	7.97275	8.02262	8.0848	8.12414
290	311	8.02789	7.94219	7.97298	8.02286	8.08509	8.12447
289	311.1	8.02811	7.94251	7.97311	8.02307	8.08544	8.12441
288	311.2	8.02811	7.94245	7.97302	8.02307	8.08501	8.12398
287	311.3	8.02823	7.9423	7.97291	8.02344	8.08517	8.12357
286	311.4	8.02823	7.94221	7.97288	8.02351	8.08515	8.12313
285	311.5	8.02834	7.94192	7.97278	8.02375	8.08525	8.1232
284	311.6	8.02823	7.94164	7.97243	8.02368	8.08494	8.12284
283	311.7	8.02847	7.94157	7.97263	8.02401	8.08541	8.12326
282	311.8	8.02858	7.94146	7.97265	8.02428	8.08553	8.12324
281	311.9	8.02857	7.94066	7.97255	8.02443	8.08552	8.12326
280	312	8.02842	7.93964	7.97226	8.02459	8.08535	8.12272
279	312.1	8.02835	7.93913	7.97217	8.02469	8.08549	8.1223
278	312.2	8.02839	7.93837	7.9719	8.02507	8.08574	8.12281
277	312.3	8.02822	7.93733	7.97176	8.02516	8.08569	8.12246
276	312.4	8.02828	7.93635	7.9714	8.02531	8.08595	8.12316
275	312.5	8.02817	7.93593	7.97131	8.0253	8.08597	8.12311
274	312.6	8.02799	7.93497	7.97096	8.02544	8.0862	8.12288
273	312.7	8.02806	7.93434	7.97073	8.0257	8.0865	8.12301
272	312.8	8.02759	7.93275	7.96989	8.0254	8.08651	8.12276
271	312.9	8.0274	7.93212	7.96965	8.02518	8.08682	8.12257
270	313	8.02738	7.93111	7.96942	8.02542	8.08694	8.12309
269	313.1	8.0272	7.93066	7.96929	8.02509	8.08702	8.12356
268	313.2	8.02694	7.92915	7.96859	8.0252	8.08698	8.12361
267	313.3	8.02678	7.92839	7.96805	8.02508	8.08707	8.12385
266	313.4	8.0265	7.92697	7.96771	8.02475	8.08738	8.12408
265	313.5	8.02644	7.92603	7.96721	8.02468	8.08791	8.12479
264	313.6	8.02604	7.92488	7.96664	8.02421	8.0878	8.12481
263	313.7	8.02579	7.92372	7.96636	8.02417	8.08798	8.12505
262	313.8	8.02559	7.92223	7.96601	8.02391	8.08823	8.12548
261	313.9	8.02531	7.92101	7.96533	8.02345	8.08855	8.12608
260	314	8.02494	7.92	7.96456	8.02315	8.08827	8.12576
259	314.1	8.02459	7.9178	7.96419	8.02294	8.08841	8.12591
258	314.2	8.02427	7.91692	7.96353	8.02271	8.08847	8.12621
257	314.3	8.02403	7.91568	7.96311	8.02267	8.08846	8.12655
256	314.4	8.0238	7.9143	7.96274	8.02236	8.08864	8.12704
255	314.5	8.02332	7.91287	7.96168	8.02195	8.08861	8.12701
254	314.6	8.02289	7.91202	7.96087	8.02172	8.08867	8.12693
253	314.7	8.0227	7.91114	7.96031	8.02147	8.08877	8.12709
252	314.8	8.02209	7.90977	7.95939	8.02131	8.08857	8.12736
251	314.9	8.02177	7.909	7.95879	8.02104	8.08852	8.12724
250	315	8.02134	7.90697	7.95784	8.02049	8.08883	8.12783
249	315.1	8.02082	7.90541	7.95671	8.02018	8.08856	8.12792
248	315.2	8.02062	7.90466	7.95621	8.02005	8.08887	8.12807
247	315.3	8.0201	7.9041	7.95559	8.01947	8.08863	8.12817
246	315.4	8.01994	7.90331	7.95503	8.01964	8.0886	8.1281
245	315.5	8.01942	7.90165	7.95398	8.01928	8.08847	8.128
244	315.6	8.01909	7.90108	7.95316	8.019	8.08867	8.12856
243	315.7	8.01851	7.89927	7.95224	8.01842	8.08828	8.12818
242	315.8	8.0181	7.89867	7.95188	8.018	8.08823	8.1278
241	315.9	8.01777	7.89771	7.95117	8.01774	8.08816	8.12783
240	316	8.01733	7.896	7.95026	8.0173	8.08827	8.12832
239	316.1	8.01697	7.89577	7.94898	8.01685	8.08798	8.12805
238	316.2	8.01655	7.89463	7.94816	8.01641	8.08765	8.12814
237	316.3	8.01638	7.8941	7.94758	8.01626	8.08799	8.12846
236	316.4	8.01574	7.89336	7.94689	8.01581	8.08722	8.12813
235	316.5	8.01541	7.8924	7.94627	8.01574	8.0871	8.12768
234	316.6	8.01526	7.89158	7.94552	8.01596	8.08722	8.12792
233	316.7	8.01484	7.89083	7.945	8.01534	8.08694	8.12796
232	316.8	8.01426	7.89	7.94411	8.01515	8.08652	8.12786
231	316.9	8.0141	7.88989	7.94363	8.01494	8.08657	8.1279
230	317	8.01377	7.8882	7.94287	8.0148	8.08628	8.12766
229	317.1	8.0134	7.88796	7.94229	8.0147	8.08598	8.12801
228	317.2	8.01319	7.88718	7.94196	8.01474	8.08613	8.12777
227	317.3	8.01301	7.88694	7.94146	8.01458	8.0859	8.12787
226	317.4	8.0127	7.88654	7.94092	8.01449	8.08554	8.12786
225	317.5	8.01243	7.88621	7.94016	8.01451	8.08529	8.12753
224	317.6	8.01241	7.8854	7.9401	8.01453	8.0853	8.12743
223	317.7	8.0122	7.88524	7.93986	8.01438	8.08518	8.12751
222	317.8	8.01196	7.88446	7.93932	8.01424	8.08479	8.12725
221	317.9	8.01176	7.88456	7.93897	8.01415	8.08465	8.12734
220	318	8.01161	7.88455	7.93855	8.01418	8.08439	8.1271
219	318.1	8.01144	7.88402	7.93801	8.01416	8.08402	8.12717
218	318.2	8.01148	7.88395	7.93791	8.01424	8.08405	8.12712
217	318.3	8.01119	7.88352	7.93739	8.01397	8.08358	8.12702
216	318.4	8.01154	7.88439	7.93731	8.01429	8.08402	8.1272
215	318.5	8.01141	7.88425	7.93716	8.01443	8.0841	8.12689
214	318.6	8.01164	7.88472	7.93723	8.01458	8.08436	8.12764
213	318.7	8.01145	7.88426	7.93699	8.01432	8.0841	8.12753
212	318.8	8.01193	7.88508	7.93745	8.01466	8.08466	8.12787
211	318.9	8.01187	7.88485	7.93705	8.01463	8.08483	8.12802
210	319	8.01207	7.88526	7.93762	8.01468	8.0849	8.12814
209	319.1	8.01229	7.88555	7.93763	8.01466	8.08552	8.12874
208	319.2	8.0126	7.88608	7.93795	8.01502	8.08589	8.12874
207	319.3	8.01285	7.88603	7.93793	8.01512	8.08619	8.12899
206	319.4	8.01323	7.88723	7.93812	8.01517	8.08663	8.1296
205	319.5	8.01374	7.88829	7.93838	8.01569	8.08721	8.12983
204	319.6	8.01409	7.88835	7.93904	8.01584	8.08752	8.1309
203	319.7	8.01455	7.88925	7.93931	8.01612	8.08809	8.13131
202	319.8	8.01532	7.89045	7.93997	8.01648	8.08856	8.1322
201	319.9	8.01581	7.89105	7.94033	8.01697	8.08957	8.13355
200	320	8.01657	7.89146	7.94101	8.01763	8.09003	8.13406
199	320.1	8.01701	7.89229	7.94122	8.01768	8.09025	8.13538
198	320.2	8.01788	7.89329	7.9424	8.01845	8.09108	8.13667
197	320.3	8.0186	7.89412	7.94335	8.01849	8.09215	8.1379
196	320.4	8.01928	7.89424	7.94363	8.01919	8.09342	8.13944
195	320.5	8.02039	7.89643	7.94472	8.01986	8.09472	8.14106
194	320.6	8.02109	7.89723	7.94555	8.02045	8.09559	8.14142
193	320.7	8.0222	7.89881	7.94658	8.02133	8.09676	8.14298
192	320.8	8.02322	7.89992	7.94758	8.02221	8.09805	8.14483
191	320.9	8.02444	7.9015	7.94836	8.0234	8.09939	8.14635
190	321	8.02558	7.90263	7.94978	8.02411	8.10056	8.14766
189	321.1	8.02678	7.90463	7.95123	8.02509	8.10221	8.1491
188	321.2	8.02809	7.90628	7.95231	8.02617	8.10357	8.15153
187	321.3	8.0291	7.90725	7.95287	8.02717	8.10519	8.15336
186	321.4	8.03086	7.90969	7.95476	8.02891	8.10683	8.15535
185	321.5	8.03226	7.91142	7.95625	8.03024	8.10841	8.15704
184	321.6	8.03349	7.91293	7.95752	8.03105	8.10974	8.15866
183	321.7	8.03504	7.9146	7.9588	8.03279	8.11146	8.16091
182	321.8	8.03669	7.91636	7.96042	8.03446	8.11334	8.16323
181	321.9	8.03837	7.91838	7.96207	8.03612	8.11513	8.16484
180	322	8.04006	7.92012	7.96377	8.03764	8.11673	8.16706
179	322.1	8.0417	7.9214	7.9655	8.03937	8.11878	8.16866
178	322.2	8.04365	7.92397	7.96764	8.04132	8.12076	8.1704
177	322.3	8.0455	7.92561	7.96908	8.043	8.12264	8.17278
176	322.4	8.04747	7.92733	7.97132	8.04464	8.12455	8.17517
175	322.5	8.04952	7.92922	7.97293	8.04684	8.12657	8.17691
174	322.6	8.05134	7.93152	7.97539	8.04836	8.1282	8.17938
173	322.7	8.05353	7.93358	7.97779	8.05051	8.13042	8.1819
172	322.8	8.05557	7.93536	7.97997	8.05233	8.13249	8.1837
171	322.9	8.0578	7.9376	7.98206	8.05433	8.13529	8.18618
170	323	8.06015	7.94035	7.98481	8.05701	8.13711	8.18835
169	323.1	8.06225	7.94182	7.98696	8.05891	8.13892	8.19017
168	323.2	8.06471	7.94407	7.99003	8.06139	8.14162	8.19294
167	323.3	8.0671	7.94703	7.99228	8.06382	8.14391	8.19533
166	323.4	8.06946	7.94932	7.99468	8.06607	8.14593	8.19763
165	323.5	8.07219	7.95233	7.9978	8.06844	8.14816	8.19983
164	323.6	8.07447	7.954	7.99991	8.07096	8.15071	8.20207
163	323.7	8.07711	7.95701	8.00293	8.07329	8.15316	8.20461
162	323.8	8.07964	7.95975	8.00577	8.07598	8.15529	8.20693
161	323.9	8.08224	7.96279	8.00865	8.07856	8.15741	8.20912
160	324	8.08492	7.96521	8.01129	8.08127	8.15991	8.21158
159	324.1	8.08761	7.9681	8.01445	8.08371	8.16233	8.21412
158	324.2	8.09047	7.97146	8.01737	8.08689	8.16487	8.2175
157	324.3	8.0933	7.97463	8.02074	8.08978	8.16691	8.21919
156	324.4	8.09608	7.97788	8.02356	8.09253	8.16961	8.22212
155	324.5	8.09866	7.98109	8.02628	8.09519	8.17195	8.22456
154	324.6	8.10168	7.98342	8.02985	8.09828	8.17451	8.22643
153	324.7	8.10454	7.98699	8.03274	8.10131	8.17697	8.22877
152	324.8	8.10745	7.99037	8.0357	8.10415	8.17972	8.23221
151	324.9	8.11038	7.99341	8.03916	8.10728	8.1817	8.23426
150	325	8.1135	7.99737	8.04279	8.11051	8.18432	8.23664
149	325.1	8.1162	8.00032	8.04535	8.11345	8.18686	8.23831
148	325.2	8.11933	8.00386	8.0491	8.11648	8.18945	8.24131
147	325.3	8.12218	8.00754	8.05258	8.1195	8.19159	8.24388
146	325.4	8.12536	8.011	8.05579	8.12284	8.19451	8.24577
145	325.5	8.12821	8.01407	8.05936	8.1259	8.1971	8.24786
144	325.6	8.13151	8.01809	8.06285	8.12939	8.19965	8.25029
143	325.7	8.13426	8.02137	8.0657	8.1322	8.20214	8.25223
142	325.8	8.13723	8.02479	8.06938	8.1352	8.20471	8.25471
141	325.9	8.14026	8.02821	8.07257	8.13863	8.20692	8.25718
140	326	8.14326	8.03194	8.07604	8.14184	8.20944	8.25866
139	326.1	8.14633	8.03542	8.07944	8.14496	8.21217	8.26067
138	326.2	8.14948	8.03946	8.08264	8.14846	8.21482	8.26425
137	326.3	8.15244	8.0425	8.08615	8.15147	8.21684	8.26557
136	326.4	8.15533	8.04655	8.09004	8.15465	8.21894	8.26759
135	326.5	8.15852	8.04991	8.09336	8.15805	8.22188	8.26925
134	326.6	8.16122	8.05333	8.09646	8.16083	8.22421	8.27169
133	326.7	8.16439	8.05755	8.10041	8.16411	8.22671	8.27339
132	326.8	8.16731	8.06076	8.10363	8.16731	8.22905	8.27624
131	326.9	8.16998	8.06421	8.1069	8.17008	8.23097	8.27774
130	327	8.17313	8.06811	8.11044	8.17335	8.23352	8.27981
129	327.1	8.1759	8.07103	8.11351	8.17624	8.23562	8.28164
128	327.2	8.17889	8.07571	8.11746	8.17939	8.23798	8.28297
127	327.3	8.18162	8.07874	8.12055	8.18202	8.24021	8.28503
126	327.4	8.18463	8.08242	8.12375	8.18518	8.24306	8.28709
125	327.5	8.18711	8.08596	8.12701	8.1877	8.24474	8.28937
124	327.6	8.18984	8.08908	8.13021	8.19062	8.24681	8.29079
123	327.7	8.19257	8.09268	8.13342	8.19338	8.24872	8.29247
122	327.8	8.1953	8.0965	8.1372	8.19591	8.2512	8.29397
121	327.9	8.19793	8.10079	8.14021	8.19854	8.25317	8.29534
120	328	8.20047	8.10309	8.14368	8.20121	8.25487	8.29606
119	328.1	8.20304	8.10706	8.14682	8.20368	8.25705	8.2976
118	328.2	8.20543	8.11038	8.14995	8.20625	8.25853	8.29867
117	328.3	8.20796	8.11395	8.1531	8.20878	8.25992	8.29977
116	328.4	8.21061	8.1179	8.15654	8.21164	8.26266	8.30083
115	328.5	8.21291	8.12069	8.15954	8.21368	8.26441	8.30153
114	328.6	8.21528	8.12392	8.16238	8.21625	8.26639	8.30321
113	328.7	8.21747	8.12727	8.16537	8.21838	8.26822	8.30422
112	328.8	8.21973	8.13109	8.16838	8.22072	8.26954	8.30521
111	328.9	8.22198	8.13351	8.17094	8.22304	8.27122	8.30615
110	329	8.2242	8.13694	8.17393	8.22496	8.27323	8.3073
109	329.1	8.22641	8.14029	8.17706	8.22696	8.27484	8.30822
108	329.2	8.22848	8.14257	8.18019	8.22922	8.27633	8.30909
107	329.3	8.23054	8.14582	8.18224	8.23088	8.27786	8.31066
106	329.4	8.23242	8.14922	8.18482	8.23281	8.27917	8.3117
105	329.5	8.23434	8.15157	8.18744	8.23477	8.28019	8.31298
104	329.6	8.23621	8.15481	8.19016	8.2368	8.28126	8.31399
103	329.7	8.23822	8.15755	8.19243	8.23859	8.2832	8.31531
102	329.8	8.23986	8.16066	8.1946	8.2402	8.28396	8.31614
101	329.9	8.2418	8.16339	8.19712	8.24207	8.28528	8.31721
100	330	8.2435	8.16576	8.19993	8.2438	8.2867	8.31836
99	330.1	8.24505	8.16891	8.2018	8.24535	8.28735	8.31913
98	330.2	8.24668	8.17094	8.20353	8.24662	8.28866	8.32069
97	330.3	8.24827	8.17293	8.20576	8.24818	8.28943	8.32159
96	330.4	8.24959	8.17518	8.20776	8.24941	8.29011	8.32321
95	330.5	8.25127	8.1781	8.21021	8.25106	8.29171	8.32453
94	330.6	8.25263	8.18043	8.2119	8.25214	8.29265	8.32548
93	330.7	8.2539	8.18161	8.2134	8.25342	8.29337	8.32612
92	330.8	8.25532	8.18417	8.21523	8.25484	8.29439	8.32718
91	330.9	8.25674	8.18637	8.21693	8.25592	8.29598	8.32826
90	331	8.2579	8.18804	8.21848	8.257	8.29702	8.32911
89	331.1	8.25922	8.19	8.22033	8.25819	8.29813	8.33
88	331.2	8.26017	8.19167	8.2217	8.25926	8.29897	8.33068
87	331.3	8.26144	8.19328	8.22294	8.26036	8.29998	8.33289
86	331.4	8.26248	8.19497	8.22434	8.2612	8.30146	8.33347
85	331.5	8.26336	8.19646	8.22556	8.26189	8.30225	8.33436
84	331.6	8.26446	8.19826	8.22685	8.26285	8.30334	8.33491
83	331.7	8.26552	8.19986	8.22862	8.26394	8.30429	8.33579
82	331.8	8.26642	8.20079	8.22917	8.26487	8.30533	8.33659
81	331.9	8.26727	8.20172	8.23003	8.2655	8.30608	8.33758
80	332	8.26825	8.2028	8.23106	8.26643	8.307	8.33846
79	332.1	8.26909	8.20333	8.23156	8.26727	8.30806	8.33914
78	332.2	8.26998	8.20403	8.23228	8.26794	8.3087	8.34
77	332.3	8.27076	8.20505	8.23274	8.26875	8.30922	8.34046
76	332.4	8.27139	8.20542	8.23297	8.26923	8.31049	8.34166
75	332.5	8.27211	8.20603	8.23354	8.26989	8.31116	8.34283
74	332.6	8.27286	8.20645	8.23402	8.2708	8.31251	8.34401
73	332.7	8.27331	8.20626	8.23408	8.27139	8.31345	8.34529
72	332.8	8.2739	8.20651	8.2345	8.2719	8.3141	8.34609
71	332.9	8.27469	8.2068	8.23485	8.27248	8.31521	8.34718
70	333	8.27511	8.20725	8.23481	8.27277	8.31597	8.34849
69	333.1	8.27553	8.20649	8.23482	8.27326	8.31677	8.34884
68	333.2	8.27638	8.20689	8.23531	8.274	8.31804	8.35006
67	333.3	8.2769	8.20649	8.23517	8.27458	8.31905	8.35171
66	333.4	8.27742	8.20665	8.23523	8.27489	8.31985	8.35366
65	333.5	8.27775	8.20586	8.23472	8.2753	8.32102	8.35416
64	333.6	8.27843	8.20573	8.23506	8.2759	8.3224	8.35618
63	333.7	8.27886	8.20555	8.23481	8.27632	8.32338	8.35682
62	333.8	8.27926	8.20551	8.23458	8.27646	8.32433	8.35819
61	333.9	8.27966	8.20533	8.23435	8.27695	8.3255	8.35914
60	334	8.27982	8.20461	8.23372	8.27731	8.3263	8.35996
59	334.1	8.28022	8.20447	8.23321	8.27771	8.32713	8.3613
58	334.2	8.2807	8.20438	8.23326	8.27832	8.32807	8.36239
57	334.3	8.28103	8.20379	8.23272	8.27861	8.32897	8.36393
56	334.4	8.2815	8.20376	8.23243	8.27921	8.33007	8.365
55	334.5	8.28173	8.20308	8.23159	8.27928	8.33128	8.36605
54	334.6	8.28219	8.20285	8.23153	8.27962	8.33275	8.36733
53	334.7	8.28254	8.20243	8.23073	8.28019	8.33369	8.36833
52	334.8	8.28285	8.20172	8.23012	8.28055	8.33498	8.36959
51	334.9	8.28318	8.20137	8.22938	8.2807	8.33642	8.37137
50	335	8.28357	8.20026	8.22848	8.28108	8.33769	8.37315
49	335.1	8.28378	8.19985	8.22833	8.281	8.33836	8.37462
48	335.2	8.28421	8.19819	8.2274	8.28161	8.34	8.37609
47	335.3	8.28435	8.19722	8.2268	8.28181	8.34111	8.37694
46	335.4	8.2848	8.19606	8.2264	8.28241	8.34246	8.37842
45	335.5	8.28514	8.19508	8.22614	8.28267	8.34341	8.37973
44	335.6	8.28522	8.19376	8.22541	8.28266	8.3444	8.38103
43	335.7	8.28583	8.19306	8.22512	8.28307	8.34627	8.38326
42	335.8	8.28601	8.19154	8.22448	8.28334	8.34729	8.38448
41	335.9	8.2861	8.19016	8.22381	8.28344	8.34814	8.38558
40	336	8.28657	8.18919	8.22377	8.28392	8.34925	8.38697
39	336.1	8.28694	8.1878	8.22344	8.28421	8.35066	8.38816
38	336.2	8.28713	8.18634	8.22293	8.28409	8.35207	8.38995
37	336.3	8.28754	8.18516	8.22229	8.28446	8.35362	8.39181
36	336.4	8.28777	8.18394	8.22166	8.28447	8.35512	8.39405
35	336.5	8.28838	8.18323	8.22155	8.28502	8.35672	8.39617
34	336.6	8.28853	8.18232	8.22097	8.28516	8.35765	8.39746
33	336.7	8.28868	8.18109	8.2204	8.28518	8.3592	8.39936
32	336.8	8.28899	8.18027	8.22003	8.28522	8.36025	8.40199
31	336.9	8.28957	8.17904	8.21994	8.28598	8.36138	8.40397
30	337	8.28999	8.17771	8.21929	8.28625	8.36323	8.40604
29	337.1	8.29034	8.17705	8.21862	8.28655	8.36449	8.40808
28	337.2	8.29075	8.17579	8.21817	8.28697	8.36592	8.41007
27	337.3	8.29095	8.17462	8.21747	8.28686	8.36714	8.41275
26	337.4	8.29155	8.17371	8.21719	8.28742	8.36863	8.4154
25	337.5	8.29172	8.17272	8.21684	8.28752	8.36955	8.41701
24	337.6	8.29223	8.17163	8.21588	8.28818	8.37082	8.41897
23	337.7	8.29272	8.17107	8.21579	8.28879	8.37255	8.42184
22	337.8	8.29307	8.16967	8.2154	8.28933	8.37376	8.42406
21	337.9	8.29347	8.16871	8.21506	8.28951	8.37524	8.42593
20	338	8.29391	8.16811	8.2146	8.28978	8.37656	8.42776
19	338.1	8.29453	8.16737	8.21464	8.29028	8.37814	8.42983
18	338.2	8.29479	8.16622	8.21371	8.29042	8.37927	8.43265
17	338.3	8.29543	8.166	8.2139	8.29098	8.38075	8.43481
16	338.4	8.29579	8.165	8.21344	8.29127	8.38223	8.43669
15	338.5	8.29637	8.16449	8.21332	8.29168	8.38327	8.43876
14	338.6	8.29696	8.164	8.21283	8.29193	8.38532	8.4417
13	338.7	8.29738	8.16354	8.21269	8.2923	8.38644	8.4434
12	338.8	8.29781	8.16281	8.21223	8.29275	8.38799	8.44571
11	338.9	8.2986	8.16236	8.21247	8.29323	8.38993	8.44816
10	339	8.29896	8.1618	8.21195	8.29313	8.39131	8.45052
9	339.1	8.2993	8.16168	8.21157	8.29338	8.39224	8.45192
8	339.2	8.29989	8.16096	8.21162	8.29386	8.39397	8.45329
7	339.3	8.30039	8.16069	8.21116	8.29405	8.39565	8.45521
6	339.4	8.3012	8.16073	8.2112	8.2947	8.39743	8.45694
5	339.5	8.30165	8.16032	8.21111	8.29532	8.39872	8.45832
4	339.6	8.30242	8.16061	8.21088	8.29545	8.40039	8.46048
3	339.7	8.30307	8.1599	8.21075	8.296	8.40212	8.46266
2	339.8	8.30354	8.15971	8.21059	8.29635	8.40366	8.46444
1	339.9	8.30402	8.15952	8.21062	8.29619	8.40476	8.46549
0	340	8.30492	8.15969	8.21121	8.29665	8.40676	8.4675

## Sheet: co2
	age	mean	5	16	50	84	95
750	265	194.876	64.0729	94.2327	184.873	295.419	359.72
749	265.1	196.012	64.2415	94.4963	185.782	297.371	362.72
748	265.2	197.283	64.375	95.038	186.806	299.538	365.357
747	265.3	198.286	64.5141	95.2699	187.68	301.77	368.605
746	265.4	199.626	64.7134	95.7447	188.74	303.948	372.344
745	265.5	200.512	64.8701	96.1394	189.563	305.446	374.138
744	265.6	201.774	65.0495	96.3784	190.578	307.675	378.495
743	265.7	202.906	65.2824	96.612	191.601	310.212	380.55
742	265.8	203.839	65.4209	96.9293	192.456	311.485	383.4
741	265.9	205.065	65.596	97.2951	193.475	313.904	386.635
740	266	206.026	65.8644	97.6257	194.16	315.656	390
739	266.1	207.085	66.0627	97.8431	194.889	317.604	393.093
738	266.2	208.124	66.2369	98.3954	195.652	319.299	396.344
737	266.3	208.981	66.4516	98.7931	196.471	320.813	398.537
736	266.4	210.085	66.5233	99.2353	197.361	323.148	400.952
735	266.5	210.992	66.6426	99.4509	198.205	324.402	404.302
734	266.6	211.817	66.7399	99.6812	199.201	325.071	407.564
733	266.7	212.792	66.9259	99.8847	199.799	327.228	410
732	266.8	213.594	67.0149	99.9443	200.597	328.724	412.941
731	266.9	214.547	67.1536	100.161	201.196	330.881	415.584
730	267	215.261	67.2901	100.265	201.887	331.644	418.514
729	267.1	216.226	67.3946	100.565	202.824	333.318	422.278
728	267.2	217.058	67.4131	100.85	203.601	334.903	424.211
727	267.3	217.776	67.5781	101.068	204.286	335.743	426.447
726	267.4	218.405	67.7381	101.228	204.935	336.618	428.395
725	267.5	219.267	67.7165	101.449	205.631	338.159	431.143
724	267.6	219.778	67.7075	101.486	206.178	339.01	433.143
723	267.7	220.579	67.9216	101.685	206.821	340.628	435.467
722	267.8	221.174	67.9762	101.864	207.395	341.212	437.568
721	267.9	221.653	67.9051	101.978	208.013	341.589	438.333
720	268	222.279	68.1275	102.255	208.35	342.431	440.333
719	268.1	222.847	68.1673	102.271	209.223	343.206	442.647
718	268.2	223.287	68.2591	102.374	209.709	344.346	443.485
717	268.3	223.667	68.2591	102.528	209.968	344.63	444.091
716	268.4	224.204	68.2661	102.416	210.667	345.143	446.212
715	268.5	224.602	68.247	102.519	211.093	345.519	447.101
714	268.6	224.855	68.3936	102.639	211.564	345.913	447.576
713	268.7	225.453	68.4064	102.878	211.922	346.377	449.672
712	268.8	225.495	68.3936	102.784	211.975	346.816	449.194
711	268.9	225.905	68.4127	102.894	212.58	346.847	449.855
710	269	226.246	68.3794	102.959	213.016	347.374	451.273
709	269.1	226.473	68.3794	102.857	213.099	347.979	451.321
708	269.2	226.529	68.3399	102.967	213.257	347.717	450.69
707	269.3	226.749	68.3399	103.06	213.421	348.045	452.031
706	269.4	226.785	68.3794	102.932	213.681	348.09	451.148
705	269.5	226.97	68.3203	102.966	213.808	348.343	451.343
704	269.6	227.057	68.2879	103.042	214.013	348.118	451.27
703	269.7	227.049	68.2443	102.943	214.078	348.506	450.597
702	269.8	227.05	68.1273	102.984	214.04	348.103	450
701	269.9	227.107	68.0899	102.879	214.118	348.571	449.846
700	270	226.929	68.0669	102.868	214.051	347.778	448.615
699	270.1	226.873	68.0741	102.824	214.091	347.829	448.462
698	270.2	226.725	67.8623	102.784	213.981	347.574	447.746
697	270.3	226.728	67.8261	102.745	213.907	347.341	447.429
696	270.4	226.547	67.7899	102.59	213.902	347.33	445.821
695	270.5	226.343	67.7338	102.54	213.579	347.234	444.576
694	270.6	226.141	67.6429	102.41	213.29	347.097	444.127
693	270.7	225.946	67.6344	102.24	213.355	346.944	442.273
692	270.8	225.719	67.6978	102.177	212.993	346.685	442.394
691	270.9	225.46	67.4296	102.302	213	346.071	440.896
690	271	225.067	67.4296	102.103	212.662	346.154	439.508
689	271.1	224.768	67.4296	101.905	212.414	345.786	438.065
688	271.2	224.631	67.4113	101.853	212.265	345.741	437.188
687	271.3	224.215	67.3498	101.523	212.027	344.837	436.167
686	271.4	223.985	67.3852	101.538	211.601	344.832	435
685	271.5	223.573	67.2727	101.45	211.439	344.861	432.394
684	271.6	223.268	67.2982	101.527	211.091	344.296	431.781
683	271.7	222.872	67.1034	101.475	210.766	343.873	430
682	271.8	222.31	67.1331	101.484	210.109	343.267	427.606
681	271.9	222.208	67.0847	101.268	209.78	343.061	427.2
680	272	221.945	66.936	101.127	209.487	343.567	426.471
679	272.1	221.6	66.8013	101.181	209.246	343.154	424.462
678	272.2	221.13	66.7797	101.103	208.833	342.55	423.559
677	272.3	220.58	66.7698	100.878	208.519	342.013	421.509
676	272.4	220.38	66.7235	100.909	208.367	342.284	420.37
675	272.5	219.983	66.6441	100.764	207.98	341.455	419.556
674	272.6	219.642	66.5306	100.625	207.592	340.958	419.167
673	272.7	219.262	66.6096	100.617	207.279	340.118	418.023
672	272.8	218.784	66.4094	100.513	206.78	339.708	417.204
671	272.9	218.618	66.3176	100.289	206.61	339.657	417.229
670	273	218.29	66.2876	100.257	206.469	339.153	416.744
669	273.1	217.973	66.2667	100.098	206.282	338.508	416
668	273.2	217.61	66.1967	100.065	205.83	337.789	415.584
667	273.3	217.319	66.1364	99.9071	205.387	337.717	415.342
666	273.4	217.146	66.2171	99.8758	205.217	337.021	415.513
665	273.5	216.946	66.1967	99.8462	205.166	336.957	415.6
664	273.6	216.701	66.1564	99.7846	204.804	336.576	415.513
663	273.7	216.533	66.1184	99.6951	204.529	335.806	415.844
662	273.8	216.448	66.1716	99.7568	204.504	335.81	416.25
661	273.9	216.602	66.1311	99.697	204.433	336.333	417.463
660	274	216.384	66.1238	99.6667	204.229	335.955	417.302
659	274.1	216.383	66.1564	99.5796	204.317	335.801	417.846
658	274.2	216.294	66.0912	99.5549	203.887	335.281	418.769
657	274.3	216.436	66.1765	99.5495	204.036	335.607	419.444
656	274.4	216.534	66.1716	99.6364	204.27	335.359	421.111
655	274.5	216.567	66.1921	99.6687	204.306	335.088	420.909
654	274.6	216.689	66.3087	99.7345	204.332	335.2	421.833
653	274.7	217.107	66.4068	99.8525	204.74	335.632	423.857
652	274.8	217.351	66.4966	99.8827	205.119	335.943	424.375
651	274.9	217.519	66.6667	100.033	205.188	335.943	426.667
650	275	217.999	66.6553	100.101	205.238	337.076	428.088
649	275.1	218.311	66.8385	100.471	205.627	337.022	428.841
648	275.2	218.934	67.028	100.759	206.042	337.882	430.82
647	275.3	219.503	67.0877	100.963	206.456	338.678	433.279
646	275.4	220.012	67.2535	101.212	206.942	338.895	435.152
645	275.5	220.628	67.2982	101.463	207.619	339.942	436.866
644	275.6	221.442	67.5	101.65	208.175	341.103	440
643	275.7	222.135	67.5912	101.849	208.577	342.432	442.308
642	275.8	223.155	67.9245	102.133	209.549	344.268	444.839
641	275.9	223.922	68.0228	102.421	210.163	345.253	446.774
640	276	224.919	68.3794	102.897	210.86	346.821	450
639	276.1	226.118	68.7398	103.403	211.429	349.11	453.167
638	276.2	227.146	68.9024	103.711	212.574	350.318	455.789
637	276.3	228.434	69.102	104.075	213.144	352.6	459.464
636	276.4	229.699	69.4142	104.523	213.893	354.126	463.962
635	276.5	231.084	69.7863	105.089	214.837	356.978	468.043
634	276.6	232.548	70	105.516	215.92	359.155	470.769
633	276.7	234.056	70.2473	106.014	217.1	361.959	475.577
632	276.8	235.739	70.6071	106.39	218.033	364.104	479.048
631	276.9	237.397	70.8929	107.106	219.34	367.211	483.462
630	277	239.345	71.3718	107.553	220.881	370.336	489.167
629	277.1	241.175	71.6423	108.185	221.953	374.366	494
628	277.2	243.17	71.9065	108.754	223.345	376.818	499.63
627	277.3	245.302	72.2878	109.355	224.93	380.574	504.63
626	277.4	247.509	72.6568	109.728	226.606	385.306	510.909
625	277.5	249.866	73.1136	110.619	228.095	388.936	516.923
624	277.6	252.194	73.4457	111.422	229.451	393.721	522.885
623	277.7	254.674	73.7218	112.222	231.19	398.346	529.565
622	277.8	257.392	74.0541	113.194	232.93	403.089	537.5
621	277.9	260.061	74.5455	114.247	235.287	407.92	543.404
620	278	262.843	75.121	115.045	237.452	413.534	550.2
619	278.1	265.705	75.4435	116.234	239.316	418.85	557.317
618	278.2	268.744	75.743	116.94	241.498	424.359	565.476
617	278.3	271.909	76.2602	117.953	243.6	429.593	574.118
616	278.4	275.294	76.6116	119.008	246.04	436.961	580.968
615	278.5	278.774	77.1008	119.96	248.589	443.434	590.345
614	278.6	282.153	77.619	121.674	251.25	449.817	597.895
613	278.7	285.569	78.1385	122.615	253.487	455.934	607.097
612	278.8	289.558	78.658	124.126	255.926	463.75	618.333
611	278.9	293.26	79.3304	125.265	258.797	470.426	627.419
610	279	297.327	79.8649	126.471	261.804	478.901	638
609	279.1	301.428	80.4918	127.656	264.365	486.395	649.118
608	279.2	305.524	81.2749	129.327	267.12	494.074	659.375
607	279.3	310.081	81.7073	130.826	270.482	502.4	670.769
606	279.4	314.593	82.2785	132.222	273.724	510.909	683.462
605	279.5	319.008	82.6891	133.568	276.21	520.349	695.714
604	279.6	323.904	83.3043	135.044	279.707	529.861	708.462
603	279.7	328.554	83.8053	136.588	283.645	537.778	722.222
602	279.8	333.683	84.3868	137.931	286.804	547.143	735.455
601	279.9	338.747	85	139.635	290.603	556.747	748.75
600	280	344.003	85.4726	141.471	294.545	566.622	762.857
599	280.1	349.325	86.3918	143.242	297.95	576.053	778
598	280.2	354.929	87.1739	144.49	302.111	586.25	793.214
597	280.3	360.645	88.232	146.277	306.17	596.79	807.576
596	280.4	366.479	88.8601	147.514	309.855	607.308	824.667
595	280.5	372.368	89.4118	149.708	315.163	617.692	840.303
594	280.6	378.521	90.0481	151.229	319.081	630.694	857.714
593	280.7	384.657	90.6	152.857	323.97	641.711	873.158
592	280.8	390.938	91.1579	154.497	328.268	653.239	889.444
591	280.9	397.382	91.6667	156.286	332.905	664.783	908.621
590	281	404.053	92.3295	157.892	337.919	677.231	926.087
589	281.1	410.662	93.253	159.205	342.732	689.848	945
588	281.2	417.352	93.9881	161.081	347.516	700.959	963.333
587	281.3	424.528	94.625	163.077	352.791	714.375	983.478
586	281.4	431.602	95.2976	165.27	357.922	726.711	1003.48
585	281.5	438.577	96.1453	167.415	363.101	740.533	1023.46
584	281.6	445.929	96.6667	168.938	367.961	753.875	1044.8
583	281.7	453.613	97.3889	170.812	373.758	766.438	1065.52
582	281.8	460.951	98.0925	172.517	380	781.268	1084.23
581	281.9	468.519	98.908	174.565	384.255	795.806	1106.21
580	282	476.44	99.5954	176.786	391.074	809.016	1131.07
579	282.1	484.485	100	179.137	396.357	823.75	1151.94
578	282.2	492.19	100.958	180.738	401.923	837.5	1172.69
577	282.3	500.262	101.667	182.695	407.591	851.346	1195.2
576	282.4	508.421	102.644	184.643	413.841	867	1218.57
575	282.5	516.681	103.593	187.203	419.692	882.105	1241.29
574	282.6	525.294	104.654	188.493	425.583	897.273	1265
573	282.7	533.862	105.247	190.511	432.056	914.34	1286.32
572	282.8	542.136	105.963	192.806	438.583	928.824	1308.95
571	282.9	551.023	106.938	195.248	445	944.565	1333.16
570	283	559.821	107.516	197.234	450.614	960.714	1359.5
569	283.1	568.563	108.354	199.034	457.706	975.778	1385
568	283.2	577.361	109.108	200.855	463.879	991.633	1407
567	283.3	586.325	110.065	203.2	471.63	1007.05	1432.5
566	283.4	594.867	111.132	205.702	476.053	1022.5	1456.67
565	283.5	604.578	111.776	207.75	483.717	1040	1482.94
564	283.6	613.164	112.632	210.472	489.902	1054.53	1506.67
563	283.7	622.714	113.548	212.231	496.606	1071.43	1535.29
562	283.8	631.602	114.125	213.934	503.519	1088.18	1560.53
561	283.9	640.749	114.72	216.161	509.364	1103.33	1583.53
560	284	650.077	115.438	218.932	516.168	1118.41	1611.43
559	284.1	659.504	116.497	220.275	523.107	1136.59	1639.41
558	284.2	668.666	117.467	222.772	529.8	1152.97	1664.62
557	284.3	678.124	118.219	224.857	536.292	1169.17	1693.57
556	284.4	686.893	119.407	226.571	543.229	1185.28	1713.64
555	284.5	696.627	120.214	228.435	550.636	1202.19	1743.53
554	284.6	705.161	120.876	230.833	556.437	1218.89	1765.38
553	284.7	714.673	121.278	233.069	562.857	1234.87	1792
552	284.8	724.221	121.985	235	569.892	1252.86	1819.23
551	284.9	732.495	122.598	236.636	575.698	1267.5	1840.77
550	285	742.005	123.759	238.85	583.023	1286.21	1868.18
549	285.1	750.439	124.697	240.549	588.696	1299.21	1891.67
548	285.2	759.978	125.906	242.885	595.444	1315.59	1919.23
547	285.3	768.469	126.692	245.051	601.86	1331.82	1945.83
546	285.4	777.348	127.444	247.732	607.841	1347.19	1967.37
545	285.5	785.899	127.941	249.01	613.778	1362.14	1992.94
544	285.6	794.056	128.731	250.449	619.082	1377.1	2016.43
543	285.7	802.448	129.385	252.826	625.641	1392.41	2041.33
542	285.8	810.663	130.248	254.526	630.725	1407.59	2062.14
541	285.9	818.606	131.083	256.211	636.951	1419.14	2088.33
540	286	825.521	131.193	257.755	642.976	1432.86	2107
539	286.1	833.759	132.124	259.479	647.229	1447.41	2131.87
538	286.2	841.299	132.719	260.93	653.793	1461.47	2154
537	286.3	848.144	133.565	262.024	658.605	1473.33	2173.89
536	286.4	855.438	133.964	264.118	664.324	1485.93	2192.22
535	286.5	862.285	134.53	265.275	668.242	1497.78	2216
534	286.6	868.532	135.221	266.522	672.464	1508.67	2233.33
533	286.7	874.545	135.752	267.917	677.241	1519.26	2250.71
532	286.8	880.073	136.207	268.571	682.785	1528.33	2263.75
531	286.9	885.957	136.583	269.231	685.789	1538.89	2283
530	287	891.263	137.119	270.39	689.351	1548.62	2300.83
529	287.1	896.049	137.5	271.081	693	1557.14	2311.11
528	287.2	899.833	137.881	272.125	696.711	1563.33	2320.83
527	287.3	904.362	138.22	273.412	700	1572.08	2333
526	287.4	908.043	138.707	274.396	702.754	1578.13	2343
525	287.5	911.643	139.076	275.106	704.937	1585.6	2354.62
524	287.6	914.547	139.478	275.591	706.667	1592	2363.33
523	287.7	917.074	139.561	276.186	709.692	1594.83	2372.86
522	287.8	918.948	139.655	276.452	710.758	1598	2380.91
521	287.9	920.442	140	276.8	711.692	1601	2387
520	288	921.77	139.828	277.03	712.5	1603.48	2388
519	288.1	922.641	139.912	276.667	712.121	1605.56	2392
518	288.2	922.849	140	277.03	712.381	1607	2395
517	288.3	922.554	139.828	276.509	712.424	1605.17	2390
516	288.4	921.519	140	276.538	711.343	1603.21	2390
515	288.5	920.559	139.913	276.19	710.58	1601.6	2386.67
514	288.6	918.4	139.483	276.1	708.732	1598.75	2380
513	288.7	916.056	139.298	275.208	706.613	1596.57	2373.75
512	288.8	913.293	139.459	274.681	704.545	1590.37	2371.82
511	288.9	910.222	139.196	273.511	701.528	1585.29	2360
510	289	905.707	138.85	272.444	698.732	1578.61	2345
509	289.1	901.843	138.661	271.461	695.882	1572.19	2337
508	289.2	896.56	138.23	270.435	691.765	1562.86	2323.33
507	289.3	891.132	138.148	268.962	687.531	1553.44	2302.22
506	289.4	885.291	137.885	267.921	683	1543.82	2289.23
505	289.5	879.416	137.157	266.389	678.125	1533	2268.33
504	289.6	872.532	136.635	265.405	672.973	1521.52	2249.23
503	289.7	864.72	135.943	263.474	667.733	1506.67	2225.71
502	289.8	856.752	135.14	261.739	661.622	1493.14	2199.23
501	289.9	848.453	134.5	259.802	655.526	1478	2177.14
500	290	839.536	133.558	258.571	649.221	1463.57	2151.67
499	290.1	830.378	132.952	256.353	642.4	1447.04	2126.43
498	290.2	820.86	132.243	253.78	635.263	1430.34	2096
497	290.3	811.222	131.887	252	628.286	1414.4	2070
496	290.4	799.928	130.583	250.098	620.732	1393.61	2033.33
495	290.5	789.102	129.652	247.727	612.133	1373.66	2006.15
494	290.6	778.514	128.983	244.667	604.306	1356.49	1976
493	290.7	767.947	127.797	242.626	596.712	1338.42	1945
492	290.8	755.816	126.667	239.714	587.671	1315.79	1915
491	290.9	743.781	125.794	236.818	578.514	1296	1878.18
490	291	732.111	124.724	234.898	569.583	1274.73	1847.86
489	291.1	719.918	123.77	232	561.034	1253.33	1810
488	291.2	706.798	122.689	228.689	551.184	1229.02	1770.63
487	291.3	693.976	120.935	226.607	541.5	1207.56	1735.33
486	291.4	681.283	120.088	224.175	532.051	1183.47	1698
485	291.5	668.729	119.147	220.707	522.051	1161.19	1662.5
484	291.6	655.849	118.231	217.907	512.326	1138.96	1625
483	291.7	642.486	116.87	215.25	503.404	1114.23	1585.45
482	291.8	629.327	115.693	213.077	493.776	1090.2	1546.88
481	291.9	616.027	114.46	210	484.369	1067.25	1509.38
480	292	603.298	113.172	207.025	474.955	1045.23	1471.25
479	292.1	589.921	111.942	203.761	465.566	1020.62	1435.71
478	292.2	577.271	110.929	201.624	456.832	998	1397.73
477	292.3	564.256	109.862	199.316	447.13	974.808	1363.18
476	292.4	551.408	108.741	196.016	438.167	951.129	1323.5
475	292.5	538.811	107.551	193.206	428.519	929.111	1287.37
474	292.6	526.315	106.184	190.915	419.583	905.2	1253.04
473	292.7	513.765	104.967	188	410.517	882.581	1216.52
472	292.8	501.433	103.667	184.762	402.283	860.667	1182.4
471	292.9	489.692	102.667	182.045	393.796	837.742	1146.96
470	293	477.35	101.4	179.062	385.036	814.93	1113.81
469	293.1	465.983	100.449	176.719	376.913	794.286	1082.4
468	293.2	454.639	98.8757	173.113	368.447	773.133	1051.43
467	293.3	443.152	97.6301	170.819	360.145	752.5	1016.15
466	293.4	432.123	96.6102	167.297	352.619	731.481	984.412
465	293.5	421.755	95.7143	164.452	345.574	712.152	956.857
464	293.6	410.943	94.8876	161.287	337.749	692.048	926.486
463	293.7	400.866	93.8333	158.621	331.04	673.708	897.429
462	293.8	390.734	92.5137	155.856	323.955	654.742	870.263
461	293.9	381.262	91.2644	153.444	317.181	636.848	843.684
460	294	371.82	90.1639	150.576	311.27	619.674	817.75
459	294.1	363.02	89.3367	147.794	305.301	603.673	793.243
458	294.2	353.925	88.6082	145.604	299.231	586.538	767.045
457	294.3	345.079	87.7249	143.269	293.141	570.28	742.955
456	294.4	336.849	86.5152	140.512	287.754	554.804	720
455	294.5	328.924	85.4146	138.465	281.91	540	699.75
454	294.6	321.324	84.466	136.306	276.804	525.446	679.211
453	294.7	313.799	83.8164	134.315	271.644	511.456	658.649
452	294.8	306.706	83	132.143	266.889	498.367	640
451	294.9	299.737	82.1875	130	261.913	485.319	620.612
450	295	293.097	81.5584	128.255	257.531	473.1	601.957
449	295.1	286.625	80.6531	125.813	253	461.495	585.455
448	295.2	280.781	79.7525	123.9	248.664	450.1	569.167
447	295.3	275.038	78.8208	122.357	244.797	440.536	554.211
446	295.4	269.535	78.2243	120.038	241.44	430.593	541.231
445	295.5	264.072	77.0404	118.513	237.331	420.323	527.193
444	295.6	258.858	76.4979	116.957	233.78	410.73	512.881
443	295.7	254.252	75.8635	115.3	230.407	402.5	501.176
442	295.8	249.682	75.3725	113.755	227.462	393.609	490.241
441	295.9	245.412	74.6304	112.268	224.449	385.839	479.067
440	296	241.121	73.9147	111.134	221.445	377.658	468.451
439	296.1	237.311	73.3459	110.033	219.17	370.419	458.312
438	296.2	233.598	72.6415	108.777	216.341	363.722	449.884
437	296.3	230.33	72.3162	107.559	214.149	357.366	440.729
436	296.4	227.073	71.6606	106.696	212.1	351.217	432.581
435	296.5	224.126	71.3074	105.605	210.073	345.411	425
434	296.6	221.297	70.6835	104.728	208.255	340.144	417.353
433	296.7	218.734	70.2817	104.017	206.605	335.193	411.226
432	296.8	216.282	69.5781	103.181	205.019	329.839	405
431	296.9	214.065	69.0083	102.58	203.062	326.333	400.435
430	297	212.061	68.7449	102.045	201.848	323.117	394.375
429	297.1	210.278	68.3858	101.354	200.83	319.788	390.522
428	297.2	208.578	68.0859	100.789	199.846	316.598	385.455
427	297.3	207.097	67.8988	100.366	199.088	313.957	382.083
426	297.4	205.874	67.7011	100.056	198.66	311.491	378.22
425	297.5	204.691	67.4717	99.7568	197.673	309.672	375.2
424	297.6	203.755	67.2348	99.3386	197.138	308.089	372.667
423	297.7	202.864	66.9888	99.3407	196.918	306.098	370.084
422	297.8	202.356	66.9373	99.1209	196.487	304.918	368.689
421	297.9	201.82	66.875	98.9106	196.316	303.571	366.984
420	298	201.423	66.7766	98.8089	195.943	302.731	366.136
419	298.1	201.274	66.8266	98.9888	196.031	302.456	365.926
418	298.2	201.216	66.8132	98.9356	195.962	302.203	365.263
417	298.3	201.266	66.8914	99.0756	196.151	302.176	364.697
416	298.4	201.559	66.8914	99.3466	196.422	302.582	365.714
415	298.5	201.925	66.9403	99.4118	196.688	303.165	366.462
414	298.6	202.272	67.0301	99.6286	197.249	303.487	367.114
413	298.7	203.073	67.1429	100.054	197.873	304.655	368.933
412	298.8	203.787	67.4144	100.464	198.364	305.277	370.248
411	298.9	204.609	67.6245	100.563	198.981	306.555	372.901
410	299	205.647	67.7778	100.836	200.237	308.178	374.934
409	299.1	206.734	68.0709	101.391	200.833	309.922	377.6
408	299.2	207.995	68.2283	101.898	201.725	312.252	381.311
407	299.3	209.333	68.6	102.324	202.561	314.286	384.462
406	299.4	210.609	68.9796	102.827	203.838	316.453	386.831
405	299.5	212.292	69.2562	103.375	205.316	319.024	391.217
404	299.6	213.768	69.5378	103.891	206.374	321.206	394.553
403	299.7	215.617	69.7881	104.495	207.662	325.138	399.098
402	299.8	217.449	70.1128	105.065	208.967	328	404.234
401	299.9	219.276	70.5166	105.742	210.083	331.71	407.983
400	300	221.375	70.8779	106.677	211.713	335.294	413.396
399	300.1	223.351	71.1197	107.32	213.412	338.792	417.75
398	300.2	225.538	71.6929	107.818	215.171	342.582	423.762
397	300.3	227.662	72.0565	108.312	216.484	347.194	428.462
396	300.4	229.809	72.5	108.947	218.32	351.08	433.398
395	300.5	232.333	72.8452	109.781	219.676	356.477	440.455
394	300.6	234.622	73.2773	110.276	221.325	360.872	445.536
393	300.7	237.112	73.786	111.515	223.289	365.517	451.01
392	300.8	239.723	74.2437	112.302	225.33	371	457.905
391	300.9	242.159	74.9153	113.027	226.624	375.581	464.124
390	301	244.709	75.4077	113.937	228.319	380.705	468.929
389	301.1	247.255	75.974	115.039	230.419	385.6	475.455
388	301.2	250.073	76.3596	116.175	232.113	391.29	482.073
387	301.3	252.744	76.9643	116.98	233.767	396.824	487.57
386	301.4	255.345	77.1861	117.722	235.305	402.119	495.426
385	301.5	258.088	77.5111	118.561	237.053	407.252	501.159
384	301.6	260.805	77.8855	119.384	238.922	412.895	508.454
383	301.7	263.265	78.3857	120.041	240.842	417	514.198
382	301.8	266.312	78.9252	121.111	243.131	422.917	521.389
381	301.9	268.927	79.381	121.909	245.368	428.254	528.571
380	302	271.583	79.6635	122.881	247.016	433.034	534.928
379	302.1	274.151	80	123.617	248.548	438.788	541.918
378	302.2	276.745	80.4933	124.477	250.219	443.467	548.235
377	302.3	279.537	80.9813	125.25	252.174	448.712	553.77
376	302.4	281.965	81.3084	126.032	253.55	453.154	561.471
375	302.5	284.554	81.7972	127.126	255.417	458.79	567.593
374	302.6	287.175	81.9811	127.924	257.562	463.878	574.118
373	302.7	289.667	82.5121	129.123	259.123	467.91	580
372	302.8	291.923	82.8431	129.831	260.541	472.671	586.897
371	302.9	294.55	83.1343	130.292	261.953	477.305	592.879
370	303	296.817	83.5	131.331	263.388	481.825	599.077
369	303.1	299.094	83.8974	131.953	264.783	485.882	605.156
368	303.2	301.377	84.3523	132.52	266.573	489.71	610.303
367	303.3	303.473	84.5026	133.239	267.929	495.037	616.176
366	303.4	305.752	84.8705	133.878	269.401	499.206	622.639
365	303.5	307.634	85.2406	134.735	270.816	502.52	626.22
364	303.6	309.55	85.5135	135.372	271.53	506.475	631.818
363	303.7	311.539	85.8378	136.082	273.048	510.476	636.883
362	303.8	313.489	86.1111	136.667	273.911	513.805	642.424
361	303.9	315.325	86.3536	137.393	274.866	517.981	646.667
360	304	316.848	86.5934	137.595	275.885	520	651.017
359	304.1	318.506	86.8333	138.099	276.842	522.931	656.301
358	304.2	319.931	87.0109	138.583	277.755	525.521	660.448
357	304.3	321.598	87.1823	138.921	279.219	529.333	664.521
356	304.4	322.903	87.4444	139.957	280.333	531.167	668.966
355	304.5	324.204	87.8409	140.558	280.852	533.246	672.949
354	304.6	325.43	88.0682	141.181	281.818	534.904	677.288
353	304.7	326.652	88.2682	141.525	282.143	537.748	681.286
352	304.8	327.911	88.4444	142.042	283.202	540.179	684.286
351	304.9	328.624	88.6188	142.446	284.074	540.707	685.472
350	305	329.844	88.8827	142.731	284.863	543.204	690.822
349	305.1	330.499	88.9011	143.128	285.254	543.883	691.429
348	305.2	331.589	89.0055	143.378	285.879	545.596	695
347	305.3	332.178	89.0608	143.733	286.099	547.041	697.091
346	305.4	332.868	89.1257	143.864	286.739	548.3	699.778
345	305.5	333.487	88.9785	144.009	286.906	549.785	702.281
344	305.6	334.076	89.027	144.326	287.722	550	704.035
343	305.7	334.715	89.2308	144.455	287.826	551.963	706.327
342	305.8	335.088	89.2391	144.72	288.367	551.765	708.163
341	305.9	335.569	89.3989	144.953	288.377	552.553	710.192
340	306	335.657	89.5082	145.308	288.832	552.9	710
339	306.1	335.923	89.7778	145.314	289.119	553.1	711.111
338	306.2	336.2	89.7778	145.561	289.021	553.474	714.259
337	306.3	336.43	89.7253	145.64	289.167	553.511	714.737
336	306.4	336.746	89.7826	145.924	289.163	553.978	716.667
335	306.5	336.958	89.8396	146.103	289.257	554.421	717.778
334	306.6	336.759	90	146.25	289.043	554.167	718.154
333	306.7	336.923	90.101	146.538	289.217	554.02	718.571
332	306.8	336.788	90.201	146.716	289.163	554.211	718.906
331	306.9	336.775	90.35	146.731	289.151	553.548	719.344
330	307	336.669	90.4478	146.866	289.312	553.261	719.836
329	307.1	336.529	90.4455	146.845	289.147	553.222	720.769
328	307.2	336.387	90.3465	146.763	288.802	552.289	721.22
327	307.3	336.243	90.5366	147.039	288.952	551.325	721
326	307.4	335.919	90.628	146.845	288.43	550.698	720.488
325	307.5	335.777	90.625	146.931	288.551	550.595	719.483
324	307.6	335.934	90.7246	147.15	288.091	551.071	722.222
323	307.7	335.427	90.7619	147.192	287.848	549.875	721.163
322	307.8	335.302	90.7547	147.01	287.762	548.851	720.488
321	307.9	335.033	90.7512	146.946	287.442	548.313	720.75
320	308	334.796	90.7981	147.065	286.948	547.857	719.091
319	308.1	334.355	90.7143	146.716	286.7	546.977	719.423
318	308.2	334.15	90.7477	146.667	286.305	546.329	718.868
317	308.3	333.908	90.7981	146.731	285.833	545.679	718.2
316	308.4	333.573	90.8019	146.555	285.622	544.94	717.5
315	308.5	333.533	90.7981	146.473	285.522	545	717.917
314	308.6	333.048	90.8372	146.54	284.745	543.75	716.735
313	308.7	333.028	90.7944	146.415	284.683	544.429	716.809
312	308.8	332.504	90.8257	146.14	284.095	543.803	716.5
311	308.9	332.473	90.8295	146.204	283.702	543.117	717.674
310	309	331.964	90.7306	146.091	283.383	542.879	714.615
309	309.1	331.849	90.7306	146.065	282.947	542.097	715.385
308	309.2	331.556	90.8036	145.972	282.77	541.94	714.474
307	309.3	331.166	90.8772	145.773	282.361	541.587	712.895
306	309.4	330.946	90.9211	145.753	281.784	541.587	713.846
305	309.5	330.85	90.837	145.631	281.594	541.228	713.333
304	309.6	330.505	90.6637	145.333	281.495	540.877	712.391
303	309.7	330.402	90.7111	145.249	281.063	540.968	712.549
302	309.8	330.299	90.5405	144.956	280.892	541.587	710.851
301	309.9	330.075	90.4525	144.933	279.918	541.639	710.6
300	310	329.813	90.583	144.779	279.751	541.639	710.8
299	310.1	329.85	90.5405	144.758	279.498	542.462	711.923
298	310.2	329.557	90.5752	144.513	279.522	542.222	710.784
297	310.3	329.429	90.6926	144.474	279.818	541.579	711.2
296	310.4	329.358	90.6987	144.342	279.863	541.053	711.961
295	310.5	329.161	90.614	143.982	279.491	540.909	712.632
294	310.6	329.272	90.6114	143.965	279.318	542.069	714.355
293	310.7	329.131	90.4889	143.578	279.273	541.475	714.219
292	310.8	329.123	90.5286	143.333	278.584	541.935	714.34
291	310.9	329.144	90.5263	143.377	278.523	541.27	715.909
290	311	329.086	90.4933	143.125	278.313	542.027	717.097
289	311.1	328.875	90.5804	143.017	277.934	541.728	717.903
288	311.2	328.965	90.5856	142.857	277.76	542.532	718.75
287	311.3	329.087	90.5	142.532	278.074	542.051	718.889
286	311.4	329.229	90.4091	142.458	277.778	541.795	721.2
285	311.5	329.228	90.411	142.194	277.649	541.667	722.128
284	311.6	329.488	90.4525	141.907	277.52	542.222	722.5
283	311.7	329.385	90.411	141.83	277.628	540.976	722.667
282	311.8	329.498	90.2765	141.429	277.737	541.528	722.826
281	311.9	329.599	90.2315	141.14	277.846	541.184	723.81
280	312	329.706	90.1435	141.35	277.992	540.27	724.808
279	312.1	330.025	90.1914	141.149	277.925	540.988	726.863
278	312.2	330.128	90.2885	140.783	277.893	540.658	726.667
277	312.3	330.558	90.2404	140.647	277.942	541.948	729.048
276	312.4	330.569	90.1456	140.596	278.043	541.646	729.333
275	312.5	330.835	90.1478	140.174	278.008	542.222	730
274	312.6	331.051	90.2913	140.087	278.108	542.439	731.489
273	312.7	331.168	90.1923	139.833	278.282	542.8	731.395
272	312.8	331.718	90.3828	139.669	278.829	543.544	732.979
271	312.9	332.064	90.1951	139.627	278.869	544.321	734.318
270	313	332.175	90.3465	139.426	278.832	544.205	735.51
269	313.1	332.565	90.2475	139.292	278.744	545.584	736.977
268	313.2	333.014	90.203	139.328	278.986	546.711	738.529
267	313.3	333.137	90.303	139.215	279.124	545.833	738.158
266	313.4	333.57	90.3553	139.106	279.63	546.282	738.78
265	313.5	333.825	90.1579	139.136	279.762	547.949	738.723
264	313.6	334.314	90.2128	138.996	280.244	547.75	739.535
263	313.7	334.678	90.2688	139.095	280.76	548.046	742.051
262	313.8	334.878	90.3867	138.984	280.819	548.795	741.351
261	313.9	335.293	90.3804	138.862	281.257	548.916	742.821
260	314	335.744	90.3867	139.073	281.744	550.137	742.632
259	314.1	336.173	90.4865	138.911	282.045	549.737	743
258	314.2	336.448	90.5946	139.184	282.597	550.423	743.846
257	314.3	336.78	90.6557	139.102	282.872	550.161	744.75
256	314.4	337.351	90.6011	139.083	282.903	551.642	746.744
255	314.5	337.679	90.7143	139.25	283.386	551.857	746.364
254	314.6	338.214	90.7263	139.046	283.892	552.432	747.447
253	314.7	338.386	90.8475	138.98	284.171	553.077	748
252	314.8	339.168	91.0112	139.05	284.615	552.933	750.588
251	314.9	339.453	91.0112	139.069	285.082	554.026	750.303
250	315	340.017	91.0674	139.051	285.585	554.675	752.571
249	315.1	340.321	91.25	138.992	286.12	554.81	752.647
248	315.2	340.623	91.3889	139.194	286.324	554.878	755
247	315.3	341.206	91.3714	139.116	287.029	556.222	755.152
246	315.4	341.432	91.3636	139.069	287.151	556.421	756
245	315.5	341.91	91.5429	139.277	287.661	556.585	758.148
244	315.6	342.293	91.5789	139.465	288	557.692	760.333
243	315.7	342.708	91.8343	139.444	288.453	557.5	760.345
242	315.8	343.168	91.8343	139.459	288.977	558.929	762.174
241	315.9	343.399	92.0359	139.62	289.337	558.902	763
240	316	343.949	92.1765	139.658	289.11	560.37	762.5
239	316.1	344.11	92.2156	139.846	289.534	559.886	763.478
238	316.2	344.627	92.2619	139.885	289.897	561.558	764.545
237	316.3	344.83	92.303	139.885	289.844	560.897	764.615
236	316.4	345.302	92.4096	140.262	290.424	562.532	765.769
235	316.5	345.578	92.7059	140.542	290.848	562.716	766
234	316.6	345.698	92.7219	140.684	291.124	562.192	766.364
233	316.7	346.055	93.0357	140.815	291.205	563.974	766.129
232	316.8	346.547	93.0539	140.996	291.941	565.119	766.333
231	316.9	346.795	93.2738	141.083	291.716	565.889	766.552
230	317	347.044	93.3133	141.203	292.416	566.129	766.8
229	317.1	347.277	93.6145	141.417	292.442	566.25	765.862
228	317.2	347.447	93.7267	141.548	292.644	566.31	767.727
227	317.3	347.613	93.8415	141.488	292.938	567.333	767.5
226	317.4	348.002	94.0361	141.667	292.921	567.439	769
225	317.5	348.123	94.1463	141.818	293.258	568.056	768.947
224	317.6	348.046	94.2771	141.977	293.296	568.028	768.148
223	317.7	348.213	94.2945	142.054	293.611	567.857	769.13
222	317.8	348.392	94.3558	142.276	293.672	567.59	768.966
221	317.9	348.546	94.5342	142.268	293.653	568.09	768.824
220	318	348.576	94.5062	142.383	294.253	568.247	769.259
219	318.1	348.636	94.6626	142.482	294.201	567.692	769.231
218	318.2	348.447	94.6707	142.652	294.311	566.364	769.565
217	318.3	348.781	94.6667	142.662	294.601	567.8	770.455
216	318.4	348.254	94.759	142.847	294.41	566.667	768
215	318.5	348.458	94.8171	142.724	294.695	566.701	769.048
214	318.6	348.098	94.9057	142.714	294.724	566.625	770
213	318.7	348.198	95	142.892	295.029	566.4	769.048
212	318.8	347.738	94.939	142.837	294.855	565.904	767.778
211	318.9	347.682	95.0617	142.73	295.146	565.25	768.667
210	319	347.467	95.0625	142.954	295.439	564.545	767.273
209	319.1	347.25	95.0307	142.842	295.422	564.359	766.207
208	319.2	346.867	95.1572	142.76	295.399	562.632	765.161
207	319.3	346.627	95.125	142.786	295.312	562.135	763.667
206	319.4	346.175	95.283	142.887	295	561.515	762.692
205	319.5	345.615	95.1553	142.714	295.342	560	759.032
204	319.6	345.351	95.2201	142.708	295.066	560.12	759.412
203	319.7	344.836	95.1572	142.77	294.843	559.176	758.438
202	319.8	343.976	95.0633	142.796	294.671	557.5	754.545
201	319.9	343.49	95.1235	142.806	294.268	556.757	754.242
200	320	342.829	95.061	142.482	293.926	555.352	751.613
199	320.1	342.342	95.1829	142.435	293.896	554.11	749.429
198	320.2	341.582	95	142.148	293.487	552.133	749.722
197	320.3	340.934	94.9425	142.151	293	551.351	748.182
196	320.4	340.17	94.8864	142.125	292.813	548.421	746.944
195	320.5	339.197	94.8295	141.891	292.244	546.585	746.129
194	320.6	338.505	94.5614	141.752	291.655	545.584	744.412
193	320.7	337.514	94.3429	141.423	291.233	544.217	742.812
192	320.8	336.525	94.1808	141.328	290.643	542.059	739.615
191	320.9	335.507	93.8983	141.074	289.818	539.867	739.6
190	321	334.447	93.7989	140.873	289.542	537.564	735.455
189	321.1	333.257	93.6464	140.458	289.301	534.308	732.941
188	321.2	332.242	93.4783	139.962	288.169	533.099	730
187	321.3	331.381	93.5484	139.663	287.926	530.896	729.167
186	321.4	329.733	93.4392	139.225	286.769	527.701	725.2
185	321.5	328.396	93.3508	138.841	285.704	525.814	721.538
184	321.6	327.404	93.1795	138.592	284.834	524.494	719.6
183	321.7	326.034	93.0808	138.266	284.161	521.867	716.429
182	321.8	324.772	92.7941	137.899	282.805	519.747	715.357
181	321.9	323.324	92.6108	137.365	281.462	517.123	712.143
180	322	321.863	92.4286	137.014	280.349	514.459	709.459
179	322.1	320.483	92.2749	136.303	279.016	512.429	706.286
178	322.2	318.764	92.0465	136.029	278.046	508.919	703.548
177	322.3	317.251	91.7727	135.54	276.727	505.823	700.588
176	322.4	315.587	91.6518	134.933	275.176	502.949	698.049
175	322.5	313.829	91.1765	134.5	273.743	499.167	695.714
174	322.6	312.369	90.837	134.038	272.804	497.253	692.5
173	322.7	310.727	90.4783	133.42	271.3	494.767	690
172	322.8	308.902	90.3433	132.957	270.242	491.647	686.667
171	322.9	307.049	90.1245	132.516	268.913	488	683.611
170	323	305.06	89.8171	131.897	267.472	484.396	678.889
169	323.1	303.46	89.521	131.242	266.033	482.135	676.25
168	323.2	301.531	89.1176	130.583	264.394	478.039	672.857
167	323.3	299.602	88.4831	129.846	262.85	474.943	669.211
166	323.4	297.719	88.0328	128.938	261.531	471.039	663.947
165	323.5	295.554	87.6316	128.29	259.907	467.374	659.75
164	323.6	293.745	87.0854	127.553	258.774	464.253	655.385
163	323.7	291.685	86.6667	126.632	256.971	459.474	651.463
162	323.8	289.805	86.3415	125.868	255.291	457.647	645.833
161	323.9	287.746	85.9524	125.085	253.737	453.673	641.087
160	324	285.683	85.6279	124.316	251.649	449.277	635.581
159	324.1	283.623	85.1364	123.614	250.302	445.789	630.263
158	324.2	281.396	84.8052	123.038	248.816	441.4	624.146
157	324.3	279.351	84.5106	122.203	247.089	437.935	619.048
156	324.4	277.196	84.0164	121.37	245.647	434	613.023
155	324.5	275.269	83.6905	120.85	244.591	430.385	608.14
154	324.6	273.102	83.1373	120.268	243.012	426.204	602.25
153	324.7	271.002	82.8897	119.59	240.972	422.222	597.073
152	324.8	268.84	82.5283	118.6	238.655	417.611	591.053
151	324.9	266.696	81.9549	117.875	237.32	413.667	584.865
150	325	264.398	81.6854	116.997	235.585	409.811	577.561
149	325.1	262.563	81.2088	116.007	234.476	406.602	573.902
148	325.2	260.304	80.5861	115.415	232.633	401.61	567.692
147	325.3	258.175	80.2491	114.673	230.946	397.759	560.938
146	325.4	255.982	79.5735	114.026	229.067	393.217	555.714
145	325.5	253.914	79.1589	113.333	227.573	388.75	549.268
144	325.6	251.622	78.4581	112.476	225.879	385.229	543.415
143	325.7	249.843	78.2251	112.063	224.332	382.404	538.605
142	325.8	247.698	77.7637	111.46	223.04	377.983	531.667
141	325.9	245.708	77.3577	110.489	221.355	374.667	527.25
140	326	243.564	77.0902	110	219.968	369.912	520.769
139	326.1	241.583	76.7339	109.288	218.371	366.585	515.897
138	326.2	239.376	76.25	108.779	216.783	363.894	508.039
137	326.3	237.381	75.7937	107.937	215.29	359.375	503.095
136	326.4	235.531	75.3668	107.296	213.976	356.071	497
135	326.5	233.367	75.019	106.888	212.33	352.991	490
134	326.6	231.613	74.6388	106.358	210.678	350.088	485.098
133	326.7	229.52	74.1065	105.652	209.36	346.355	479.508
132	326.8	227.62	73.6531	105.082	207.778	343.306	474.444
131	326.9	226.027	73.1227	104.477	206.593	340.403	470
130	327	223.935	72.8044	103.925	205.013	337.48	463.273
129	327.1	222.23	72.381	103.386	203.636	335	458.75
128	327.2	220.283	71.828	102.799	202.19	330.985	453
127	327.3	218.643	71.3732	102.402	200.848	328.333	449.375
126	327.4	216.69	71.0135	101.986	199.574	325.617	443.077
125	327.5	215.233	70.6623	101.494	198.501	323.688	439.583
124	327.6	213.598	70.1623	100.907	196.917	321.169	434.429
123	327.7	211.887	69.7863	100.376	195.955	318.323	429.667
122	327.8	210.202	69.359	99.8172	194.599	315.517	424.348
121	327.9	208.599	69.0041	99.084	193.507	313.373	419.583
120	328	207.113	68.2787	98.5787	192.494	310.373	415.429
119	328.1	205.511	67.8629	98.1704	191.158	307.901	410.159
118	328.2	204.106	67.561	97.6019	190.283	305.657	406.711
117	328.3	202.601	67.2874	97.0698	189.32	303.032	401.475
116	328.4	201.11	66.7729	96.3825	188.182	301.323	398.025
115	328.5	199.701	66.5882	95.9909	186.992	298.75	394.179
114	328.6	198.442	66.2548	95.4091	186.152	296.869	390.87
113	328.7	197.101	65.8621	95.137	185.275	294.95	386.667
112	328.8	195.821	65.6154	94.6714	184.293	292.762	382.987
111	328.9	194.59	65.1953	94.2588	183.66	290.376	380.253
110	329	193.332	64.6988	93.9202	182.624	288.592	375.843
109	329.1	192.013	64.28	93.293	181.853	286.98	371.711
108	329.2	190.952	63.9921	92.7924	181.411	285.16	369.31
107	329.3	189.852	63.7692	92.5	180.721	283.656	366.556
106	329.4	188.775	63.3969	92.2118	179.975	281.823	362.842
105	329.5	187.804	63.1203	91.7661	179.219	280.355	361.398
104	329.6	186.741	62.9889	91.5777	177.957	279.14	357.416
103	329.7	185.586	62.7076	91.2925	177.084	277.317	354.783
102	329.8	184.746	62.3024	90.9502	176.345	275.911	351.707
101	329.9	183.681	62.1284	90.6473	175.388	274.474	347.925
100	330	182.844	61.9142	90.274	174.731	273.348	345.568
99	330.1	182.032	61.6447	90.0928	173.96	271.937	343.78
98	330.2	181.102	61.4381	89.7477	173.37	270.143	340
97	330.3	180.297	61.1039	89.6226	172.851	269.228	338.105
96	330.4	179.548	60.9325	89.2254	172.464	268.032	336.129
95	330.5	178.775	60.8025	88.8194	171.925	266.772	334
94	330.6	178.052	60.581	88.6215	171.242	265.738	330.9
93	330.7	177.432	60.6087	88.5211	170.754	264.708	330.089
92	330.8	176.666	60.3448	88.1818	170.576	263.542	327.453
91	330.9	175.965	60.142	87.9215	170.109	262.402	325.149
90	331	175.476	59.6209	87.7103	169.709	261.897	324.196
89	331.1	174.758	59.6135	87.2912	169.405	260.044	321.026
88	331.2	174.302	59.4231	87.1236	168.789	259.56	319.921
87	331.3	173.686	59.1429	86.7929	168.355	258.806	318.244
86	331.4	173.208	58.8942	86.5446	167.938	258.264	316.364
85	331.5	172.72	58.7143	86.3927	167.675	257.814	314.921
84	331.6	172.289	58.5377	86.1343	167.273	257.465	313.307
83	331.7	171.65	58.1651	85.8411	166.967	256.446	311.007
82	331.8	171.354	57.7974	85.6235	166.839	255.893	310.303
81	331.9	170.916	57.6991	85.4333	166.699	255.511	308.197
80	332	170.484	57.2961	85.3271	166.325	255.221	306.774
79	332.1	170.097	57.0339	85.034	166.369	254.659	304.874
78	332.2	169.647	56.8803	84.8853	166.321	253.717	302.88
77	332.3	169.305	56.569	84.6453	166.172	253.478	301.875
76	332.4	169.04	56.4706	84.5045	166.321	252.753	299.867
75	332.5	168.738	56.3265	84.3111	166.14	252.491	299.524
74	332.6	168.459	56.0956	84.0535	166.168	252.425	297.669
73	332.7	168.249	55.8893	83.9825	166.208	252.033	296.503
72	332.8	168.007	55.5859	83.8852	166.371	251.509	295.556
71	332.9	167.678	55.3516	83.5824	166.111	251.486	294.43
70	333	167.53	55.1984	83.4681	166.235	251.199	293.312
69	333.1	167.372	55.0988	83.1915	166.302	250.644	292.516
68	333.2	166.959	54.697	82.9536	166.23	249.854	290.909
67	333.3	166.803	54.6008	82.7615	166.33	249.185	289.854
66	333.4	166.597	54.5038	82.6004	166.38	248.681	288.995
65	333.5	166.462	54.4275	82.438	166.693	248.403	288.333
64	333.6	166.202	53.9474	82.1622	166.714	247.841	288.533
63	333.7	166.1	53.8346	82.0204	166.846	247.627	288.187
62	333.8	165.919	53.829	81.8902	166.793	247.403	287.486
61	333.9	165.844	53.8148	81.8913	166.937	247.286	287.989
60	334	165.874	53.5766	81.6867	167.204	247.018	287.633
59	334.1	165.744	53.2601	81.5538	167.152	246.994	287.963
58	334.2	165.508	52.9078	81.2623	166.996	246.489	287.256
57	334.3	165.477	52.6207	80.9804	167.073	246.435	287.697
56	334.4	165.333	52.3667	80.9249	167.085	246.081	287.423
55	334.5	165.356	52.1927	80.7573	167.152	245.672	287.47
54	334.6	165.115	52.0724	80.415	167.111	245.128	287.133
53	334.7	165.076	51.8506	80.2947	167.232	244.88	287.468
52	334.8	165.041	51.8065	80.1172	167.212	244.66	288.092
51	334.9	164.964	51.5556	79.8661	167.291	244.603	287.959
50	335	164.912	51.5123	79.755	167.243	244.214	289.021
49	335.1	164.865	51.2812	79.6214	167.277	244.103	288.792
48	335.2	164.799	51.0736	79.1342	167.136	243.857	289.11
47	335.3	164.812	51.0366	79.1593	167.187	244.007	289.195
46	335.4	164.683	50.8358	78.8816	167.031	244.106	289.441
45	335.5	164.598	50.7143	78.6637	167.205	244.046	290.526
44	335.6	164.638	50.3939	78.4547	167.195	244.139	290.598
43	335.7	164.529	50.0308	78.2135	167.114	244.068	291.29
42	335.8	164.498	49.7845	77.9701	167.111	244.186	291.21
41	335.9	164.553	49.5299	77.8448	166.811	244.548	291.24
40	336	164.457	49.3162	77.6242	166.865	244.522	291.805
39	336.1	164.361	48.9873	77.381	166.96	244.396	291.618
38	336.2	164.403	48.7705	77.2903	166.79	244.794	291.654
37	336.3	164.351	48.4739	76.9214	166.612	245.305	292.105
36	336.4	164.344	48.189	76.8387	166.621	245.669	292.897
35	336.5	164.108	47.8824	76.5458	166.133	245.621	292.621
34	336.6	164.236	47.5591	76.2971	166.167	246.234	293.356
33	336.7	164.323	47.2619	76.046	165.984	246.678	294.218
32	336.8	164.228	47.2332	75.9459	165.612	246.656	294.416
31	336.9	164.081	46.9141	75.654	165.293	247.09	294.533
30	337	163.972	46.6667	75.4298	164.801	247.484	294.631
29	337.1	163.885	46.5116	75.2192	164.462	247.627	294.834
28	337.2	163.838	46.2692	74.9592	163.959	247.76	295.22
27	337.3	163.933	46	74.7368	163.727	248.511	295.951
26	337.4	163.751	45.7414	74.413	163.055	248.494	295.939
25	337.5	163.759	45.5472	74.2799	162.758	248.44	295.89
24	337.6	163.614	45.3788	74.0283	162.182	248.502	296.184
23	337.7	163.483	45.1737	73.9235	161.818	248.78	296.164
22	337.8	163.379	44.8855	73.8323	161.196	248.812	296.957
21	337.9	163.289	44.7126	73.5913	160.809	248.879	296.763
20	338	163.236	44.542	73.3661	160.224	249.373	297.464
19	338.1	162.961	44.3382	73.2411	159.763	249.146	296.866
18	338.2	162.98	44.0377	73.002	159.661	249.323	297.385
17	338.3	162.807	44.0226	72.6654	159.171	249.469	297.239
16	338.4	162.726	43.829	72.4272	158.901	249.905	297.287
15	338.5	162.538	43.6059	72.2308	158.392	249.785	297.226
14	338.6	162.43	43.2364	71.9231	158.157	249.517	297.293
13	338.7	162.215	43.0961	71.7954	157.871	249.483	297
12	338.8	162.117	42.9181	71.6441	157.596	249.491	297.08
11	338.9	161.822	42.6715	71.3178	157.224	249.583	296.589
10	339	161.798	42.5532	71.1479	157.017	249.94	296.957
9	339.1	161.72	42.4476	71.0659	156.826	250.136	297.114
8	339.2	161.446	42.2109	70.6977	156.396	250	297.222
7	339.3	161.311	42.1122	70.4873	156.139	250.1	297.075
6	339.4	160.975	41.9094	70.2896	155.385	250.033	297.338
5	339.5	160.82	41.7981	70.0388	155.291	249.968	297.218
4	339.6	160.458	41.4953	69.7585	154.985	249.488	297.05
3	339.7	160.235	41.358	69.4903	154.463	249.817	297.111
2	339.8	160.099	41.1526	69.1787	154.354	249.758	297.246
1	339.9	159.936	41.1012	68.7678	154.092	249.665	297.313
0	340	159.577	40.8036	68.5106	153.665	249.408	297.231

## Sheet: dic
	age	mean	5	16	50	84	95
750	265	1537.33	535.517	803.864	1520.69	2294.9	2584
749	265.1	1538.07	535.6	803.111	1519.24	2300.59	2588.71
748	265.2	1539.32	535	802.727	1517.94	2304.39	2595.71
747	265.3	1539.78	534.286	800.93	1516.98	2307.35	2604.29
746	265.4	1541.23	533.462	800.952	1516.35	2312.94	2610.67
745	265.5	1541.44	533.448	799.048	1514.44	2313.5	2616.15
744	265.6	1542.67	532.581	798.049	1514.38	2316.88	2623.1
743	265.7	1543.61	532.424	796.923	1513.16	2320.54	2629
742	265.8	1544.24	532.069	796.25	1512.45	2321.75	2635.33
741	265.9	1545.06	531.935	795.897	1511.56	2325	2643.04
740	266	1545.67	530.968	794.167	1512.22	2327.3	2647.08
739	266.1	1546.5	529.73	794	1511.48	2331.08	2653.33
738	266.2	1547.42	528.919	793.714	1510.98	2335	2660
737	266.3	1547.81	528.857	794.118	1510.41	2337.06	2664.86
736	266.4	1548.65	528.286	792.647	1510.32	2340	2670.69
735	266.5	1548.97	528.158	792.571	1509.09	2343.96	2677.89
734	266.6	1549.55	527.838	792.5	1507.61	2345.58	2683.33
733	266.7	1550.25	527.105	791.579	1507.03	2350.2	2690
732	266.8	1550.82	527.368	791.111	1506.35	2352.17	2694.09
731	266.9	1551.17	526.579	791.22	1505.32	2354.21	2699.31
730	267	1551.63	526.389	791.333	1504.35	2356.47	2703.08
729	267.1	1552.33	525.833	790.909	1503.04	2358.79	2707.43
728	267.2	1553.15	525.429	790	1502.18	2363.16	2715
727	267.3	1553.25	525	788.75	1500.93	2364.29	2718.1
726	267.4	1553.39	524.878	788.387	1500.54	2366.32	2720.5
725	267.5	1554.18	524.286	787.188	1501.02	2367.86	2725
724	267.6	1554.57	524.651	786.471	1500.49	2369.27	2727.1
723	267.7	1555.12	524.103	785.172	1499.39	2373.87	2732.96
722	267.8	1555.21	523.784	785.484	1497.14	2374.12	2736.92
721	267.9	1555.51	524.054	785.161	1497	2377.14	2738.08
720	268	1555.87	523.529	785.294	1495.42	2378.93	2741.3
719	268.1	1556.17	522.812	784.359	1494.89	2380	2745
718	268.2	1556.18	522.571	783.947	1494.44	2380.5	2747.39
717	268.3	1556.46	522.286	783.784	1494.47	2381.46	2750.4
716	268.4	1556.79	521.842	783.333	1493.12	2383.51	2751.76
715	268.5	1556.74	521.622	783.514	1491.4	2383.33	2754.35
714	268.6	1557.13	521.351	783.659	1491.82	2384.38	2755.24
713	268.7	1557.62	521.351	782.973	1490.75	2386.39	2758.62
712	268.8	1557.36	521.579	782.821	1490	2385.85	2759.2
711	268.9	1557.33	521.579	783.023	1489.77	2386.09	2761.5
710	269	1557.67	522.308	782.5	1489.13	2387.44	2763.6
709	269.1	1557.84	522.162	782.683	1488.72	2388.57	2765.65
708	269.2	1557.51	522.973	782.564	1487.61	2387.78	2764.55
707	269.3	1557.85	522.564	782.895	1486.9	2388.54	2767.14
706	269.4	1557.58	522.75	782.381	1486.14	2388.05	2767.37
705	269.5	1557.81	523.095	781.892	1485.11	2389.59	2768
704	269.6	1557.81	523.171	782.059	1485.23	2390	2769.09
703	269.7	1557.77	523.171	782.188	1484.76	2391.25	2771.36
702	269.8	1557.47	522.821	782.105	1484.09	2392.62	2770.5
701	269.9	1557.84	523.095	782.941	1484.19	2392.22	2770.48
700	270	1557.44	523.721	783.03	1484.09	2392.68	2770.83
699	270.1	1557.26	523.415	782.857	1482.83	2392.5	2772
698	270.2	1557.16	523.684	783.143	1482.4	2394	2771.3
697	270.3	1557.52	523.684	783.684	1482.08	2394.29	2771.67
696	270.4	1557.04	523.947	783.158	1481.96	2392.78	2770.83
695	270.5	1557.09	523.947	783.333	1481.5	2393.75	2770
694	270.6	1557.17	524.545	784.211	1481.54	2393.49	2769.41
693	270.7	1556.77	524.571	783.429	1480.77	2394.57	2768.33
692	270.8	1556.75	524.737	784.474	1480.79	2393.78	2768.5
691	270.9	1556.77	525	784.444	1482.05	2394.29	2768.42
690	271	1556.09	525.349	785.385	1480.7	2394.59	2766.5
689	271.1	1555.95	525.116	785.789	1480.5	2394.88	2765
688	271.2	1556.13	525.333	785.882	1480.73	2395.35	2765.19
687	271.3	1555.8	525.682	786.111	1480.56	2395.22	2764.14
686	271.4	1555.74	525.682	786.364	1480.51	2395.96	2764.23
685	271.5	1555.36	525.952	786.875	1479.8	2395.96	2762.08
684	271.6	1555.39	526.585	786.944	1479.8	2395.11	2761.79
683	271.7	1555.29	526	787.576	1480.73	2396.98	2760
682	271.8	1554.74	526.41	787.222	1480.28	2395.23	2757.1
681	271.9	1555.11	526.667	786.944	1481.03	2396.9	2758.24
680	272	1555.3	526.579	787.647	1482.09	2397.56	2758.46
679	272.1	1554.9	526.757	787.568	1482.14	2398.09	2756.87
678	272.2	1554.68	527.027	788.108	1481.43	2397.66	2755
677	272.3	1554.3	527.436	788.333	1482.38	2397.02	2753.55
676	272.4	1554.29	526.765	787.632	1481.22	2397.44	2750.77
675	272.5	1554.06	526.857	787.949	1481.46	2397.32	2748
674	272.6	1554.17	527.429	787.25	1482.05	2396.86	2749.58
673	272.7	1553.9	527.273	787.632	1482.56	2396.67	2745.52
672	272.8	1553.75	527.879	787.714	1483.27	2395.29	2745.2
671	272.9	1553.96	527.941	787.941	1483.26	2396.17	2744.58
670	273	1553.76	528.438	788.485	1482.44	2395	2744.62
669	273.1	1553.68	528.438	788.71	1482.89	2395.83	2741.56
668	273.2	1553.29	528.182	788.387	1483.04	2395.53	2739.64
667	273.3	1553.58	528.333	788.485	1483.47	2395	2738.85
666	273.4	1553.62	527.188	787.632	1483.45	2395.69	2737.5
665	273.5	1553.54	527.5	788.056	1484.29	2395.42	2734.17
664	273.6	1553.63	527.419	788.611	1484.2	2395.45	2734
663	273.7	1553.77	527.5	788.387	1484.9	2395.1	2731.25
662	273.8	1553.98	527.188	787.5	1485.31	2395.96	2733.23
661	273.9	1554.61	527.143	787.812	1485	2396.89	2734.55
660	274	1554.23	526.389	786.364	1485.59	2397.38	2732.78
659	274.1	1554.2	526.389	786.429	1485.61	2397.56	2732.14
658	274.2	1554.51	526.757	786.667	1485.96	2398.33	2731.21
657	274.3	1554.74	526.579	785.862	1485.33	2399.21	2731.54
656	274.4	1555.34	526.579	785.862	1486.6	2399.76	2733.33
655	274.5	1555.51	526.41	785.625	1487.71	2399.53	2732.5
654	274.6	1555.56	526	785.161	1487.06	2400.45	2732.81
653	274.7	1556.27	526.053	785	1487.66	2402.33	2735.31
652	274.8	1556.34	525.833	785.161	1488	2403.08	2734.29
651	274.9	1556.5	525.789	784.375	1488.09	2403.25	2736.3
650	275	1557.37	525.676	784.062	1487.71	2405.23	2741.54
649	275.1	1557.6	525.484	783.75	1487.17	2406.75	2740.45
648	275.2	1558.39	525.333	782.593	1486.84	2408.64	2743.81
647	275.3	1559.13	525.517	782.593	1486.91	2411.79	2748.15
646	275.4	1559.38	524	781.538	1486.38	2414.1	2749.6
645	275.5	1559.87	523.929	781.154	1486.67	2415.25	2753.04
644	275.6	1560.81	524	780.385	1486.86	2418.11	2757.27
643	275.7	1561.06	524.138	780	1486.04	2421.52	2759.6
642	275.8	1562.2	523.438	779.412	1487	2425.53	2766.32
641	275.9	1562.68	523.03	779.189	1486.34	2427.03	2768.64
640	276	1563.43	522.188	778.056	1485.9	2431.67	2774.29
639	276.1	1564.35	521.562	776.842	1485.81	2437.03	2780.63
638	276.2	1565.01	520.938	776.389	1485.11	2439.71	2785
637	276.3	1566	520.789	775.5	1484.2	2445.31	2793.18
636	276.4	1567.02	520.556	775.405	1484.29	2450.89	2797.73
635	276.5	1568	520.488	774.5	1484.19	2453.12	2805.22
634	276.6	1568.72	518.718	774.054	1483.54	2458.57	2812
633	276.7	1569.71	518	772.857	1482.89	2464.52	2820
632	276.8	1570.57	517.174	770.968	1480	2468.79	2827.14
631	276.9	1571.71	516.667	771.176	1479.79	2474.52	2832.86
630	277	1572.91	515.625	770.312	1479.75	2481.72	2844
629	277.1	1573.94	514.884	770	1479.02	2485.86	2851.5
628	277.2	1574.82	514.091	768.333	1477.8	2491.15	2861.85
627	277.3	1576.18	513.171	766.154	1476.11	2498	2868.95
626	277.4	1577.1	512.432	765.161	1475.19	2503.87	2878.42
625	277.5	1578.35	511.22	762.143	1474.29	2510.94	2888.75
624	277.6	1579.42	510.513	761.111	1472.35	2515.76	2896.32
623	277.7	1580.54	509.512	759.5	1471.4	2523.75	2905.45
622	277.8	1581.91	508.421	757.872	1470.81	2529.67	2913.85
621	277.9	1583.13	507.561	756.5	1468.64	2537.81	2924.4
620	278	1584.32	507.045	755.238	1464.57	2546.82	2934.14
619	278.1	1585.55	505.227	753.061	1462.73	2553.08	2945.38
618	278.2	1586.78	504.524	751.02	1460	2562.76	2957.37
617	278.3	1588.01	502.6	747.8	1459.56	2571.07	2969
616	278.4	1589.41	501.739	746.667	1457.11	2579.33	2980.56
615	278.5	1590.74	501.228	743.469	1454.09	2587.42	2994.44
614	278.6	1591.84	498.056	741.02	1452.05	2595.63	3004.29
613	278.7	1592.83	495.25	738.75	1448.37	2603.93	3016
612	278.8	1594.43	493.953	736.038	1445.35	2613.14	3033.08
611	278.9	1595.44	491.778	733.214	1442.86	2623.24	3044.35
610	279	1596.9	489.412	730.208	1441.02	2632.94	3057.06
609	279.1	1598.28	488.163	728.25	1437.17	2641.61	3069.05
608	279.2	1599.39	486.596	725.652	1434.29	2651.05	3081.67
607	279.3	1600.8	483.913	723.137	1430.62	2659.63	3097.37
606	279.4	1601.97	482.222	720.769	1425.91	2670.28	3111.76
605	279.5	1603.39	480.87	718	1422.22	2677.69	3122.31
604	279.6	1604.59	478.2	715.2	1416.03	2687.78	3136.11
603	279.7	1605.62	475.882	711.8	1411.09	2696.96	3147.2
602	279.8	1606.98	474.091	709.388	1407.14	2704.09	3161.82
601	279.9	1608.34	471.136	706.25	1403.6	2713.33	3173.16
600	280	1609.43	469.434	703.778	1399.25	2722.22	3186.32
599	280.1	1610.66	468	700.227	1396.27	2730.91	3198
598	280.2	1612	465.745	696.97	1394.67	2739.57	3214.09
597	280.3	1613.2	464.468	694	1391.23	2750	3226.09
596	280.4	1614.46	462.143	691.143	1388.39	2756.8	3238.42
595	280.5	1615.51	460.227	688.537	1386.9	2766.25	3250.59
594	280.6	1617.01	458.605	686.585	1383.83	2774.17	3264.62
593	280.7	1618.02	456.829	682.391	1380.43	2783.14	3276.15
592	280.8	1619.06	454.324	680	1377.32	2792.19	3287.06
591	280.9	1620.37	451.081	675.263	1373.4	2798.46	3302.22
590	281	1621.55	450.238	672.045	1371.06	2806.67	3313.53
589	281.1	1622.63	447.105	667.66	1369.32	2815.14	3326.36
588	281.2	1623.54	444	665.417	1367.14	2823.89	3337.5
587	281.3	1624.8	442.368	662.826	1364.55	2833.03	3347.86
586	281.4	1625.74	440.5	659.057	1362.93	2839.52	3359.17
585	281.5	1626.86	438.378	656.481	1359.56	2847.27	3371.43
584	281.6	1627.88	436.286	653.8	1358	2854.44	3383.57
583	281.7	1628.97	433.333	651.273	1356.17	2863.04	3394.62
582	281.8	1629.93	430.811	648	1355.37	2868.95	3407.27
581	281.9	1631.14	430	645.652	1354	2874.29	3418.75
580	282	1631.99	427.241	642.812	1352.73	2881.18	3430
579	282.1	1633.06	424.706	639.048	1350.73	2887.6	3442
578	282.2	1633.98	423.023	637.059	1348.91	2894.17	3454.62
577	282.3	1634.76	421.02	634.681	1349.11	2899.57	3464
576	282.4	1635.77	418.108	632.609	1348.97	2906.15	3477.14
575	282.5	1636.74	416	630	1347.63	2913.2	3489.09
574	282.6	1637.82	413.864	627.333	1349.03	2918.33	3500
573	282.7	1638.55	411.6	624.286	1346.74	2925	3510.91
572	282.8	1639.32	409.211	622.308	1344.34	2930.95	3519.23
571	282.9	1640.27	405.4	618.444	1343.49	2936.43	3530.67
570	283	1641.17	403.265	615.882	1341.71	2942.5	3540
569	283.1	1642.03	401.111	613.529	1339.52	2946.43	3550
568	283.2	1642.74	399.756	610	1337.8	2951.33	3558.75
567	283.3	1643.56	397.179	606.364	1337.06	2955.71	3566.15
566	283.4	1644.2	394.103	603.333	1335.37	2961.43	3575.38
565	283.5	1645.1	392.619	600.5	1334.42	2965	3585.83
564	283.6	1645.8	391.591	598.431	1333.41	2969	3589.17
563	283.7	1646.56	389.362	596.078	1331.14	2974.55	3599.09
562	283.8	1647.29	387.778	593.696	1328.94	2979.17	3608.75
561	283.9	1647.97	386.098	590.93	1328.97	2983.08	3616.67
560	284	1648.64	384.681	588.704	1328.42	2987.14	3622.86
559	284.1	1649.33	383.256	586.667	1328.18	2992.67	3630.91
558	284.2	1649.93	382	585.2	1327.22	2996.88	3638.33
557	284.3	1650.7	379.333	583.684	1326.94	2999.52	3645.71
556	284.4	1651.18	377.708	581.897	1325	3005.33	3652.5
555	284.5	1651.85	377.021	579.615	1323.86	3008.89	3659.17
554	284.6	1652.34	375.952	577.843	1322.22	3012.31	3665
553	284.7	1653	373.953	576.4	1321.43	3017.22	3670
552	284.8	1653.66	372.609	574.902	1320.83	3021.88	3678.33
551	284.9	1654.1	371.429	572.8	1320	3024.74	3685.38
550	285	1654.65	370	571.373	1319.15	3027.78	3690.83
549	285.1	1655.14	368.919	569.483	1318.48	3031	3696.67
548	285.2	1655.6	367.75	567.544	1318.2	3034.21	3702.67
547	285.3	1656.18	366.053	566.066	1318.04	3037.78	3710.53
546	285.4	1656.65	364.146	564	1316.98	3038.89	3715
545	285.5	1657.14	363.095	562.885	1316	3041.43	3721.11
544	285.6	1657.51	362.045	561.042	1315.65	3045	3723.57
543	285.7	1658	360.465	559.818	1315.23	3047.22	3730.5
542	285.8	1658.4	359.512	558.214	1315.24	3048.95	3733.75
541	285.9	1658.81	358.5	556.774	1315.35	3051.88	3739
540	286	1659.03	356.512	555.69	1314.75	3053.33	3741.54
539	286.1	1659.52	355.405	555.179	1314.21	3054	3746
538	286.2	1659.83	354.634	554.107	1313.9	3056.88	3749.17
537	286.3	1660.14	353.636	553.036	1313.59	3061.25	3751.54
536	286.4	1660.55	352.368	552.075	1313.06	3062.14	3755.71
535	286.5	1660.96	351.538	551.964	1312.86	3062.86	3760
534	286.6	1661.19	350.476	551.053	1312.7	3063.57	3762
533	286.7	1661.5	349.8	550.185	1312.29	3065.62	3766.15
532	286.8	1661.71	349.375	549.167	1312.11	3067.86	3767.69
531	286.9	1662.02	348.298	548.393	1311.67	3069.23	3770.63
530	287	1662.22	348.043	547.544	1310	3070	3773.57
529	287.1	1662.45	347.273	546.981	1310	3070.91	3775.63
528	287.2	1662.57	346.744	546.731	1310.3	3071.67	3776.88
527	287.3	1662.77	346.047	546.471	1310	3073.08	3779.38
526	287.4	1662.97	345.714	545.849	1309.41	3073.57	3781.54
525	287.5	1663.16	345.714	545.385	1308.42	3073.57	3783.57
524	287.6	1663.28	345.106	544.902	1308.46	3074.29	3783.57
523	287.7	1663.42	345.208	544.898	1308.25	3075	3785
522	287.8	1663.53	344.894	544.717	1308.29	3075.29	3787.33
521	287.9	1663.61	344.583	544.615	1308.1	3075.88	3787.86
520	288	1663.67	344.6	544.63	1308.1	3075.88	3788.46
519	288.1	1663.78	344.314	544.528	1308.1	3076.67	3789.33
518	288.2	1663.77	344.2	544.423	1308.1	3076	3789.29
517	288.3	1663.79	344.118	544.615	1307.67	3076.67	3790
516	288.4	1663.78	344.34	544.615	1308.33	3076	3790
515	288.5	1663.79	344.615	544.815	1308.1	3076	3790
514	288.6	1663.69	344.902	545	1308.25	3075.63	3788.46
513	288.7	1663.7	345.283	545.49	1308.41	3075.33	3790
512	288.8	1663.56	345.283	545.577	1308.44	3074.67	3789.09
511	288.9	1663.48	345.6	546.042	1308.51	3073.85	3787
510	289	1663.32	346.078	546.667	1309.13	3072.86	3785
509	289.1	1663.24	346.735	546.981	1309.52	3071.67	3783.57
508	289.2	1663.05	348	547.647	1309.75	3069.33	3782.35
507	289.3	1662.85	348.222	548.269	1310	3068.13	3780.56
506	289.4	1662.62	348.837	548.814	1310.57	3066.47	3780
505	289.5	1662.51	350	549.333	1311.54	3065.71	3774.38
504	289.6	1662.23	350.714	549.836	1311.79	3063.85	3772.86
503	289.7	1661.91	352.222	550.217	1313.4	3060.91	3769.17
502	289.8	1661.63	352.5	550.244	1314.17	3059.33	3764.67
501	289.9	1661.23	353.81	552.609	1314.69	3056.67	3760.63
500	290	1660.89	354.75	554.082	1314.9	3056.15	3756.43
499	290.1	1660.52	355.814	555.098	1315.22	3050.83	3752
498	290.2	1660.07	357.273	556.481	1315.32	3048.75	3746.15
497	290.3	1659.63	358.235	557.593	1316.22	3045.63	3740
496	290.4	1659.18	360.833	559.623	1316.89	3042.86	3735.38
495	290.5	1658.62	362.857	562.115	1317.75	3040.56	3728.46
494	290.6	1658.06	363.958	563.333	1318.05	3037.5	3721
493	290.7	1657.55	365.87	565.319	1319.05	3032.67	3717.5
492	290.8	1656.91	367.708	567.551	1320	3030.5	3708.46
491	290.9	1656.29	369.388	570	1321.22	3025	3701.88
490	291	1655.72	372.105	572.157	1322.56	3021.18	3692.5
489	291.1	1655	373.621	573.333	1323.7	3014.44	3685.45
488	291.2	1654.11	375.636	577.143	1324.22	3009	3675.71
487	291.3	1653.46	377.5	579.333	1325.71	3004.67	3666.92
486	291.4	1652.59	380.889	583.019	1327.11	2998.33	3657.14
485	291.5	1651.83	382.619	585.952	1328.04	2992.73	3647.69
484	291.6	1650.95	384.773	589.348	1329.56	2986.43	3636.25
483	291.7	1650.01	387.5	592.791	1332.16	2978.67	3626.25
482	291.8	1649	388.889	595.682	1333.12	2970	3616
481	291.9	1648.08	391.351	600.233	1335.37	2966.25	3604.67
480	292	1647	394.571	603.158	1336.75	2960.77	3592.67
479	292.1	1645.86	396.316	606.889	1338.21	2952.5	3580
478	292.2	1644.75	398.372	611.429	1340	2946.36	3566
477	292.3	1643.68	401.905	615.581	1342.39	2940	3552.22
476	292.4	1642.34	404.419	620.87	1344.04	2930.77	3535.45
475	292.5	1641.17	407.045	623.889	1346.25	2923.85	3523
474	292.6	1639.82	409.111	627.391	1348.68	2915	3506.92
473	292.7	1638.53	412.857	632.245	1350	2906.25	3491.25
472	292.8	1637.08	415.897	635.957	1352.29	2896.67	3478.18
471	292.9	1635.76	417.949	640.213	1354.26	2887.27	3461.25
470	293	1634.14	421.389	644.902	1355.75	2877.22	3447
469	293.1	1632.72	425.278	649.167	1357.33	2868.95	3432.73
468	293.2	1631.28	427.838	653.721	1359.78	2859.29	3416.67
467	293.3	1629.41	431.111	656.842	1363.03	2846.67	3396.84
466	293.4	1627.88	433.793	660.526	1366.18	2836	3381.25
465	293.5	1626.26	438.214	664.545	1368.14	2826	3363.33
464	293.6	1624.54	439.75	670	1372	2813.68	3343.64
463	293.7	1622.73	443.667	674.103	1374.52	2801.88	3324.62
462	293.8	1620.83	447.368	679.091	1377.5	2790.45	3303.33
461	293.9	1619.03	450	684.043	1380.59	2778.18	3283.89
460	294	1617.07	453.415	687.872	1385	2767.37	3262.11
459	294.1	1615.58	457.073	693.514	1390	2754	3241.11
458	294.2	1613.36	460.217	698.788	1392.77	2738.82	3219.44
457	294.3	1611.32	462.667	702.857	1396.67	2723.75	3197.14
456	294.4	1609.4	465.714	706.25	1402.56	2708.75	3179.17
455	294.5	1607.61	468.704	709.459	1408.54	2696.25	3158
454	294.6	1605.58	472.8	713	1414.23	2680.71	3137.5
453	294.7	1603.34	475.849	714.894	1421.63	2663.46	3118
452	294.8	1601.31	479.231	717.736	1429.05	2646.43	3100
451	294.9	1599.45	481.489	718.519	1437.18	2627.88	3081
450	295	1597.04	483.864	721.212	1443.9	2612.26	3057.86
449	295.1	1594.98	486.735	724.615	1452.69	2595.33	3040.71
448	295.2	1593.16	488.824	726.923	1458.39	2581.05	3022.35
447	295.3	1591.46	491.081	729.286	1466.04	2563.6	3005
446	295.4	1589.49	495.833	730.851	1470.93	2547.78	2987
445	295.5	1587.24	497.941	732.5	1476.6	2530	2969.44
444	295.6	1584.96	500.909	734.839	1480.7	2514.72	2951.43
443	295.7	1583.06	501.538	736.97	1485.83	2500.86	2935.38
442	295.8	1581.27	502.75	738.649	1489.78	2485.59	2920
441	295.9	1579.76	504.444	740.571	1491.88	2472.06	2904.17
440	296	1577.58	506.41	743.125	1497.14	2458.48	2886.67
439	296.1	1575.82	508.293	744.375	1502.55	2447.58	2870
438	296.2	1574.26	510.444	745.641	1508.54	2433.95	2855.71
437	296.3	1572.89	511.707	747.805	1514.17	2422.37	2843.48
436	296.4	1571.26	512.619	749.75	1517.84	2406.77	2827.78
435	296.5	1569.72	513.333	750.25	1522.18	2395.94	2815.83
434	296.6	1568.22	514.706	751.667	1525.56	2384.69	2803.75
433	296.7	1566.59	515.806	754.186	1528.03	2375.62	2789.05
432	296.8	1565.6	516.25	755.882	1531.9	2368.64	2778.26
431	296.9	1564.34	516.486	756.957	1535.27	2361.3	2766.52
430	297	1563.29	517.368	760.185	1540.17	2351.79	2755.6
429	297.1	1562.49	518.378	760.196	1542.46	2345.41	2746.96
428	297.2	1561.39	518.421	762	1545.83	2338.11	2737.69
427	297.3	1560.52	518.947	762.444	1547.92	2333.75	2730.5
426	297.4	1559.82	519.722	762.391	1549.46	2330.86	2723.91
425	297.5	1559.28	520.233	763.182	1550.21	2328.28	2716.15
424	297.6	1558.72	520.426	763.333	1552.78	2326.45	2711.94
423	297.7	1558.08	520.638	762.889	1554.21	2323.33	2707.31
422	297.8	1557.96	521.25	763.617	1554.49	2322.86	2702.67
421	297.9	1557.5	520.816	763.8	1555.53	2321.28	2700.31
420	298	1557.39	521.373	763.8	1556.22	2319.57	2696.4
419	298.1	1557.2	520.851	763.023	1556.75	2318.96	2695.22
418	298.2	1557.24	521.042	763.111	1557.06	2318.33	2692.5
417	298.3	1557.41	519.565	762.5	1557.5	2318.64	2692.07
416	298.4	1557.78	519.783	761.875	1557.69	2321.28	2694.62
415	298.5	1558.31	519.318	761.633	1558.37	2321.52	2696.9
414	298.6	1558.11	519.13	761.489	1556.83	2321.8	2700
413	298.7	1559.18	518.667	760.233	1556.4	2323.95	2704.83
412	298.8	1559.29	518.261	759.5	1555.37	2324.85	2709.05
411	298.9	1559.92	517.826	758.974	1554.91	2327.3	2714.14
410	299	1560.51	517.727	757.297	1554.81	2330.21	2719.55
409	299.1	1561.54	517.391	756.286	1554.39	2332.83	2726.67
408	299.2	1562.17	516.2	755	1552	2334.75	2734.4
407	299.3	1563.09	515.4	754.722	1549.3	2339.72	2741.74
406	299.4	1563.61	514.898	752.5	1548.49	2342.86	2749.2
405	299.5	1565.01	513.469	751.282	1546.54	2349.09	2758.26
404	299.6	1565.64	512.449	748.98	1544	2352.37	2765.77
403	299.7	1566.86	511.4	749.111	1543	2359.49	2777.62
402	299.8	1568.34	509.565	747.391	1540.36	2365.71	2785.83
401	299.9	1569.12	507.959	745.814	1538.8	2372.58	2794.55
400	300	1570.16	507	743.947	1536.05	2379.38	2804.76
399	300.1	1571.29	505.532	741.944	1534.69	2385	2812.35
398	300.2	1572.82	504.375	740.556	1533.53	2392.81	2824.29
397	300.3	1573.88	502.545	738.837	1531.48	2399.09	2831.87
396	300.4	1574.87	501.296	737.073	1530.19	2405.77	2838.95
395	300.5	1576.59	499.787	735.676	1527.14	2414.29	2852.31
394	300.6	1577.38	498	734.118	1525.09	2421.85	2860
393	300.7	1578.39	497.391	733.333	1522.5	2430	2871.67
392	300.8	1579.85	496.341	731.875	1521.06	2438	2883.68
391	300.9	1581.3	494.103	730.667	1518.89	2443.94	2896.11
390	301	1582.13	493.261	728.684	1515.42	2451.18	2907.06
389	301.1	1583.27	491.667	727.805	1512	2458.89	2917.22
388	301.2	1584.75	490.87	726.41	1508.95	2467.14	2929.38
387	301.3	1585.9	489.5	725	1505.95	2473.46	2940
386	301.4	1586.96	488.182	723.5	1502.89	2480.8	2951.11
385	301.5	1588.27	486.591	722	1500	2490.34	2963.75
384	301.6	1589.56	484.872	721.429	1497.45	2498.79	2972.31
383	301.7	1590.15	483.171	719.767	1494.58	2506.07	2982.73
382	301.8	1591.42	481.538	719.231	1489.76	2516.4	2995
381	301.9	1592.34	480	717.5	1487.27	2525	3004.62
380	302	1593.51	478.947	717.073	1484.71	2532.5	3017.22
379	302.1	1594.39	476.585	715.532	1480.81	2542.07	3028
378	302.2	1595.17	474.359	714.783	1477.83	2550.32	3037.22
377	302.3	1596.15	473.333	713.636	1476.67	2558.4	3045.45
376	302.4	1596.97	472.326	712.75	1474.76	2565	3056.47
375	302.5	1597.87	470.714	711.351	1472.6	2573.53	3065.71
374	302.6	1598.8	470.714	710.312	1470.41	2581.11	3073
373	302.7	1599.49	469.184	710.27	1467.04	2586.07	3082.5
372	302.8	1600.02	468.205	710	1464.29	2591.43	3091.82
371	302.9	1601.03	467.073	708.718	1462.33	2598.4	3100
370	303	1601.63	465.814	707.895	1459.74	2605.38	3109
369	303.1	1602.45	464.884	707.5	1458.53	2611.48	3118.18
368	303.2	1602.8	464.082	706.389	1454.76	2616.82	3125
367	303.3	1603.44	462.857	704.545	1453.04	2623	3131.67
366	303.4	1604.09	462.34	703.947	1450.61	2629.33	3140.53
365	303.5	1604.33	460.476	702.895	1447.71	2632.78	3144.09
364	303.6	1604.91	459.565	702.619	1446.49	2634.44	3153
363	303.7	1605.35	458.696	700.789	1443.68	2637.27	3157.86
362	303.8	1605.93	457.5	700	1441.28	2642.35	3165
361	303.9	1606.36	457.234	699.211	1440.5	2645.63	3168.82
360	304	1606.57	456.889	698.889	1438.29	2647.5	3174.67
359	304.1	1606.79	455.625	697.895	1437.3	2649.29	3182.5
358	304.2	1607.28	455	697.778	1436	2652	3184.74
357	304.3	1607.71	454.51	697.576	1433.82	2655	3190.56
356	304.4	1607.68	454	695.882	1432.81	2655.56	3193.81
355	304.5	1607.99	453.333	695.455	1430.94	2656.11	3195.88
354	304.6	1608.11	452.222	694.444	1428.29	2657.5	3201.82
353	304.7	1608.33	451.778	693.636	1428.33	2660.43	3203.5
352	304.8	1608.63	451.395	693.226	1427.5	2660.56	3207.06
351	304.9	1608.39	450.909	692.069	1426.15	2660	3206.87
350	305	1608.59	449.535	691.333	1424.44	2660	3208.1
349	305.1	1608.65	449.302	691.25	1424.26	2659	3209.44
348	305.2	1608.7	449.302	691.471	1423.12	2659.52	3214.12
347	305.3	1608.8	448.667	691.471	1423.2	2660	3215.26
346	305.4	1608.79	448.837	690.857	1422.27	2660.67	3217.5
345	305.5	1608.81	448	691.081	1422.22	2661.33	3217.89
344	305.6	1608.73	448.14	690.541	1421.28	2660	3218.57
343	305.7	1608.85	447.333	690.769	1420.8	2661.54	3224
342	305.8	1608.79	447.674	690.25	1420.96	2660.67	3225.45
341	305.9	1608.56	447.857	689.394	1420.21	2661.43	3228.57
340	306	1608.44	447.857	689.062	1420.55	2660.59	3228.89
339	306.1	1608.23	447.333	688.788	1420.54	2659.44	3228.5
338	306.2	1608.17	447.073	687.941	1418.78	2660	3229.44
337	306.3	1608.16	446.744	687.714	1419.02	2660.62	3231.82
336	306.4	1608.04	446.512	687.419	1418.6	2659.47	3233.85
335	306.5	1607.99	446.17	686.97	1418	2660	3235.88
334	306.6	1607.8	446	686.875	1418.22	2660	3238.33
333	306.7	1607.61	445.909	685.938	1417.8	2658.57	3240
332	306.8	1607.36	445.778	685.526	1417.5	2658.08	3240.53
331	306.9	1607.25	445.435	685.278	1417.18	2657.5	3242
330	307	1607.06	444.884	685.556	1417.44	2656.09	3241
329	307.1	1606.69	444.565	684.872	1416.67	2654.76	3241.33
328	307.2	1606.63	444.444	685	1416.49	2655.2	3241.25
327	307.3	1606.49	444.545	684.722	1415.61	2655	3241.58
326	307.4	1606.25	444.667	684.242	1415.38	2654.81	3240.83
325	307.5	1606.06	444.545	684.167	1415	2654.62	3240
324	307.6	1606	444.318	683.75	1415	2654.8	3241.43
323	307.7	1605.71	444	683.636	1415.41	2653.2	3239.09
322	307.8	1605.67	444.13	683.226	1415	2653.33	3240
321	307.9	1605.53	444.167	683.529	1414.63	2653.33	3240
320	308	1605.33	443.913	683.03	1414.55	2653.6	3237.78
319	308.1	1605.07	444.167	683.611	1414.32	2652.8	3237
318	308.2	1604.97	444.286	682.703	1414.05	2651.82	3236.36
317	308.3	1604.92	444.583	682.632	1414.05	2652.5	3236.36
316	308.4	1604.75	444.375	682.703	1413.81	2651.76	3236.15
315	308.5	1604.72	445	682.368	1413.66	2653.48	3237
314	308.6	1604.37	445.106	682.5	1413.75	2653.08	3235
313	308.7	1604.47	444.694	681.892	1412.82	2653.04	3234.62
312	308.8	1604.26	444.6	681.944	1412.11	2653.2	3233.75
311	308.9	1604.33	444.286	682.222	1411.84	2653.81	3234.62
310	309	1604.12	444.286	682.105	1411.32	2654.29	3232.31
309	309.1	1604.29	444.043	682.308	1412.16	2654.17	3232.73
308	309.2	1603.83	443.617	682.895	1411.67	2653.7	3231.82
307	309.3	1603.7	443.654	682.564	1411.36	2653.87	3229.5
306	309.4	1603.78	443.4	682.895	1412.45	2653.93	3232.31
305	309.5	1603.84	443.6	682.564	1412.34	2655	3235.56
304	309.6	1603.61	443.269	682.75	1412.05	2655	3235.71
303	309.7	1603.75	442.8	683.333	1411.71	2654.85	3236.67
302	309.8	1603.73	443.269	682.857	1411.28	2655.17	3240
301	309.9	1603.64	443.137	683.143	1410.91	2655.17	3237.27
300	310	1603.61	442.391	683.125	1410.73	2654.48	3237.5
299	310.1	1603.82	442.174	683.03	1411.03	2654.84	3239.33
298	310.2	1603.62	442.045	683.125	1410.27	2654.64	3239.29
297	310.3	1603.74	441.86	683	1409.56	2656.07	3240
296	310.4	1603.67	441.429	683.75	1409.35	2655.6	3241.67
295	310.5	1603.7	441.25	683.75	1408.57	2654.23	3240.91
294	310.6	1604.09	440.789	683.824	1408.43	2656.67	3242
293	310.7	1603.86	440	684.545	1408.51	2656.5	3242.14
292	310.8	1604.08	440	684.545	1408.12	2657.65	3243.64
291	310.9	1604.18	438.889	683.871	1407.84	2657.78	3244.29
290	311	1604.28	438.974	684.242	1408.43	2658.13	3247.33
289	311.1	1604.07	439.167	684.516	1407.92	2656.67	3247.33
288	311.2	1604.18	439.118	684.706	1407.6	2657.14	3247.86
287	311.3	1604.33	439.211	684.688	1407.08	2657.65	3249.23
286	311.4	1604.45	439.118	685.455	1407.33	2656.82	3251.67
285	311.5	1604.62	438.529	685.333	1407.95	2657.89	3252.73
284	311.6	1604.77	437.647	685.333	1407.38	2658.42	3251.88
283	311.7	1604.89	437.879	685.806	1407.44	2658.33	3252.5
282	311.8	1605.11	437.714	685.938	1406.96	2659.41	3254.12
281	311.9	1605.02	437.714	686.286	1407.14	2660	3255.56
280	312	1604.97	437.027	686	1407.75	2660.71	3255
279	312.1	1605.3	436.75	685.882	1408.06	2659.33	3256.47
278	312.2	1605.48	436.842	686.364	1407.8	2658.24	3255.71
277	312.3	1605.8	437.027	687	1407.56	2660.45	3257.86
276	312.4	1605.73	436.765	687.742	1407.32	2658.33	3257.65
275	312.5	1606.02	435.833	687.879	1407.75	2660	3257.86
274	312.6	1606.09	435.556	687.429	1407.69	2660	3258
273	312.7	1606.27	435.526	687.568	1407.25	2658.46	3258.57
272	312.8	1606.35	435	687.5	1406.92	2660	3259.23
271	312.9	1606.64	434.5	687.297	1406.9	2660	3262.5
270	313	1606.76	434.524	687.027	1406.19	2658.33	3260.83
269	313.1	1606.96	434.762	687.436	1406	2660	3262.73
268	313.2	1607.35	434.103	688.108	1406.58	2659.23	3263
267	313.3	1607.24	433.421	687.317	1406.92	2658.18	3262.22
266	313.4	1607.55	432.286	687.5	1407.18	2659.17	3262.73
265	313.5	1607.81	432.286	687.895	1407.07	2660	3262.22
264	313.6	1608.02	431.944	687.838	1406.9	2660.63	3263.33
263	313.7	1608.18	431.471	688.056	1407.44	2661.18	3264.55
262	313.8	1608.26	431.538	687.5	1407.07	2660.63	3265.83
261	313.9	1608.38	430.833	687.714	1407.37	2660.63	3265.56
260	314	1608.69	430.303	687.879	1407.5	2662.31	3266.36
259	314.1	1608.84	430	687.5	1408	2661.88	3266.67
258	314.2	1609.06	429.25	687.879	1408.33	2662.5	3266.67
257	314.3	1609.23	428.571	687.812	1409.09	2662.38	3266.67
256	314.4	1609.71	428.718	688.235	1409.15	2663.53	3267.69
255	314.5	1609.55	428.5	688.182	1409.36	2662.5	3266.67
254	314.6	1609.86	428.649	687.714	1410.41	2663.46	3266.5
253	314.7	1609.99	428.205	687.879	1410.8	2662.86	3266.47
252	314.8	1610.35	427.442	687.419	1411.22	2663.6	3268.82
251	314.9	1610.51	427.333	687.576	1412	2663.75	3267.5
250	315	1610.82	427.111	687.742	1412.04	2664	3268.82
249	315.1	1610.77	426.667	687.419	1411.52	2663.5	3268.75
248	315.2	1610.87	426.098	687.187	1411.63	2664.5	3268.67
247	315.3	1611.38	426.098	687.778	1412.45	2665.71	3269.17
246	315.4	1611.39	426	687.5	1411.86	2665.5	3269.09
245	315.5	1611.62	425.476	687.436	1412.39	2665.56	3268.33
244	315.6	1611.94	424.884	687	1412.56	2666.5	3269
243	315.7	1611.77	424.5	686.842	1411.84	2665.88	3271.43
242	315.8	1612.14	424.186	687.222	1412.2	2667.83	3272.35
241	315.9	1612.22	423.721	686.944	1413.19	2668.42	3270.71
240	316	1612.47	423.75	686.857	1412.86	2670	3272
239	316.1	1612.36	423.409	686.875	1413.33	2671.36	3270.63
238	316.2	1612.84	423.409	687.419	1414.26	2671.9	3270.77
237	316.3	1612.98	423.488	687	1414.67	2673.18	3270
236	316.4	1612.99	423.488	687.5	1414.44	2674.74	3266.67
235	316.5	1613.17	423.182	687.143	1414.67	2674.29	3268
234	316.6	1613.17	423.023	687.5	1415.26	2673.68	3265
233	316.7	1613.38	422.791	687.143	1416.1	2675	3266
232	316.8	1613.5	422.381	687.2	1415.95	2676	3264.29
231	316.9	1613.85	422.326	686.923	1416.59	2675.56	3265
230	317	1613.92	422.444	687.2	1416.9	2675.71	3264.29
229	317.1	1614	421.707	686.667	1417.38	2676.19	3264.29
228	317.2	1614.15	421.707	686.538	1417.44	2676.67	3263.33
227	317.3	1614.24	421.463	685.926	1417.61	2676.11	3262.67
226	317.4	1614.47	421.25	687.083	1418	2676.11	3263.08
225	317.5	1614.46	421.026	686.538	1418.33	2676.8	3262
224	317.6	1614.49	421.026	685.667	1419.05	2676.88	3259.09
223	317.7	1614.59	421	685.357	1419.76	2676.9	3260
222	317.8	1614.71	421.282	685.667	1420.8	2678.15	3260
221	317.9	1614.81	421.25	685.172	1420.83	2678.7	3257.78
220	318	1614.85	421.25	684.643	1421.09	2679.57	3255.83
219	318.1	1614.93	421	684.516	1421.28	2679.09	3255.45
218	318.2	1614.69	420.526	684.828	1421.82	2679.5	3255.38
217	318.3	1615.02	420.789	684.615	1421.71	2680.59	3255
216	318.4	1614.68	420.526	684.8	1422.67	2680.56	3254.44
215	318.5	1614.99	421.053	684.444	1423.4	2681.33	3254.44
214	318.6	1614.71	420.789	684.839	1423.75	2679.44	3254.44
213	318.7	1614.68	421.026	685.312	1423.91	2678.75	3254
212	318.8	1614.86	421.25	685.667	1424.68	2678.24	3255
211	318.9	1614.63	421	685.758	1424.77	2676.84	3254.29
210	319	1614.73	421.026	686.25	1425.61	2677.89	3254.17
209	319.1	1614.72	421.429	686.429	1426.15	2676.88	3255.71
208	319.2	1614.5	421.463	686.364	1426.92	2675.63	3253.75
207	319.3	1614.55	421.667	686.389	1426.9	2674.62	3252
206	319.4	1614.31	421.5	686.571	1426.73	2675	3253.33
205	319.5	1614.18	422.143	686.316	1427.23	2673.33	3251.67
204	319.6	1614.36	422.143	687.273	1427.8	2672.5	3252.5
203	319.7	1614.13	422.381	687.813	1428.7	2670.48	3251.25
202	319.8	1613.66	423	688.125	1428.37	2668.24	3248.75
201	319.9	1613.56	423.261	688.437	1428.04	2664.5	3250
200	320	1613.42	423.659	689.333	1429.59	2662.27	3248.33
199	320.1	1613.34	423.333	688.75	1430.81	2660.91	3246.25
198	320.2	1613.07	424.048	689.697	1431.03	2655.29	3250
197	320.3	1613.09	424.25	689.706	1432.89	2652.5	3250
196	320.4	1612.5	424.651	690	1433.78	2648.33	3248.89
195	320.5	1612.38	425.111	690.625	1435.13	2644.71	3250
194	320.6	1612.11	425.532	690.333	1435	2642.35	3248.75
193	320.7	1611.97	425.435	690.323	1436.47	2637.83	3247.14
192	320.8	1611.6	426.279	690.714	1437.44	2633.89	3248.89
191	320.9	1611.22	426.364	691.034	1438.61	2631.5	3248.33
190	321	1610.91	426.522	691.429	1439.71	2630.87	3245.83
189	321.1	1610.35	427.143	691.852	1440.64	2625.88	3246
188	321.2	1610.1	427.805	692.759	1441.14	2622.35	3243.33
187	321.3	1609.99	428	693.667	1442.27	2620	3244
186	321.4	1609.43	428.684	694.828	1443.92	2616.67	3239.17
185	321.5	1608.75	428.947	695.357	1444.42	2614.29	3237
184	321.6	1608.43	430	696.8	1444.58	2611.9	3235.56
183	321.7	1608.14	429.706	698.148	1445.21	2607.89	3232.86
182	321.8	1607.77	430.588	699.31	1445.56	2604.55	3230
181	321.9	1607.3	431.071	700	1446.51	2600.34	3230
180	322	1606.78	431.481	700.435	1446.38	2595	3226.67
179	322.1	1606.32	432.593	701.333	1446.36	2591.43	3223.64
178	322.2	1605.61	433.077	701.628	1447.38	2588.1	3220.83
177	322.3	1605.25	433.571	702.143	1448.1	2584.76	3214.44
176	322.4	1604.55	433.448	703.023	1448.97	2579	3211
175	322.5	1603.87	434	703.778	1451	2576.47	3205.63
174	322.6	1603.47	434.828	704.444	1452.5	2572.11	3201.82
173	322.7	1603.04	435.294	705	1453.68	2566.92	3196.15
172	322.8	1602.24	436	705.75	1454	2563.16	3192.63
171	322.9	1601.41	436.562	706.667	1455	2555.79	3186.36
170	323	1600.7	437.714	707.222	1455.22	2552.14	3177.27
169	323.1	1600.22	439.143	708.056	1457.91	2548.24	3175
168	323.2	1599.72	439.429	709	1460.22	2543.81	3168.24
167	323.3	1598.89	440.909	709.318	1460.45	2537.62	3165.63
166	323.4	1598.14	442.187	710.638	1461.67	2531.18	3159.23
165	323.5	1597.42	442.727	711.224	1463.1	2525	3154.38
164	323.6	1596.78	443.429	712	1464.59	2520	3150.67
163	323.7	1595.71	444.571	713.333	1465.12	2512	3143.57
162	323.8	1595.32	445.714	714.694	1466.08	2508.24	3140.59
161	323.9	1594.36	446.757	714.898	1467.06	2502.11	3131.67
160	324	1593.61	447.429	715.51	1467.96	2497.06	3124.29
159	324.1	1592.75	448.966	715.778	1469.36	2491.3	3116.67
158	324.2	1591.85	450	716.17	1471.56	2485.29	3108.12
157	324.3	1591.39	451.395	717.209	1473.48	2481.25	3103.13
156	324.4	1590.14	451.795	717.75	1475.68	2476.5	3095.62
155	324.5	1589.52	452.632	717.561	1477.23	2471.36	3087.65
154	324.6	1588.81	453.421	718.684	1478.33	2466.19	3080.77
153	324.7	1588.15	454.324	719.268	1482.17	2460.42	3075.63
152	324.8	1587.04	454.75	719.756	1483.54	2454.23	3066.67
151	324.9	1586.18	455.897	719.762	1486.04	2448.85	3057.22
150	325	1585.27	456.585	721.212	1488.51	2444.78	3050
149	325.1	1584.86	457.368	721.818	1490	2441.2	3044.17
148	325.2	1583.82	458.889	722.647	1492.11	2435.6	3034.35
147	325.3	1582.64	460	723.529	1494	2430.91	3026.32
146	325.4	1581.92	461.212	725.143	1497.33	2425.81	3019.33
145	325.5	1581	463.023	727.045	1499.53	2420.48	3008
144	325.6	1580.08	464.211	727.143	1501.84	2414.5	2999.41
143	325.7	1579.62	466.111	728.98	1504.12	2411.05	2992.35
142	325.8	1578.49	467.838	729.423	1506.73	2405.36	2983.68
141	325.9	1577.77	469.474	730.426	1508.37	2400.87	2976.47
140	326	1576.77	470.755	731.522	1510.43	2397.19	2969.38
139	326.1	1576.22	471.224	731.951	1513.64	2392.67	2961.05
138	326.2	1574.93	472.857	733.158	1514.35	2387.31	2950.53
137	326.3	1574.28	475.116	733.75	1515.78	2383.64	2940.48
136	326.4	1573.53	477.381	734.688	1516.11	2379.68	2931.18
135	326.5	1572.42	478.837	736.216	1520.22	2376.92	2922.5
134	326.6	1571.79	480	736.667	1522.16	2370.37	2913.13
133	326.7	1570.75	481.224	737.805	1523.04	2366.43	2901.82
132	326.8	1569.97	481.86	739.091	1524.88	2362.41	2894.67
131	326.9	1569.67	483.488	741.136	1526.09	2360	2885.88
130	327	1568.54	485	741.875	1528.1	2355.6	2875.29
129	327.1	1568.02	486.585	744.107	1530	2352.5	2866.84
128	327.2	1566.91	487.317	745.357	1530	2350.71	2856.67
127	327.3	1566.31	488.043	745.273	1531.82	2346.67	2847.65
126	327.4	1565.32	488.636	746.875	1533.85	2344.58	2836.88
125	327.5	1565.08	489.348	747.907	1534.15	2343.2	2830.67
124	327.6	1564.24	491	748.205	1534.17	2341.29	2822.5
123	327.7	1563.59	491.463	749.048	1533.94	2337.78	2813.75
122	327.8	1562.79	492.553	750	1535	2335.36	2804.5
121	327.9	1562.07	494.464	751.569	1535.69	2333.44	2795.83
120	328	1561.57	495.385	752.308	1536.92	2331	2790.43
119	328.1	1560.46	495.893	753.469	1540	2326.59	2780
118	328.2	1560.05	497.193	754.4	1541.41	2324.39	2771.58
117	328.3	1559.4	498.846	755.532	1541.96	2321.16	2762.5
116	328.4	1558.67	500.233	756.136	1544	2320.47	2755.26
115	328.5	1558.03	501.556	756.667	1546.14	2316.5	2747.06
114	328.6	1557.8	502.619	757.045	1547.84	2316.25	2739.38
113	328.7	1557.24	504.595	757.727	1551.25	2314.19	2730.67
112	328.8	1556.72	506	758.409	1552.3	2313.58	2724.29
111	328.9	1556.24	507.297	759.524	1553.21	2311.33	2717.83
110	329	1555.77	507.778	760.435	1555.56	2309.76	2711.3
109	329.1	1555.22	508.286	760.833	1556.73	2307.22	2703.64
108	329.2	1554.77	510	761.6	1558.64	2305.52	2696.47
107	329.3	1554.73	510.909	762.34	1560.78	2304.42	2692.27
106	329.4	1554.05	510.833	762.439	1563.02	2303.04	2684.55
105	329.5	1554.15	510.833	764.146	1565.93	2302.22	2678.5
104	329.6	1553.67	512	765	1567.59	2301.54	2671.88
103	329.7	1553.17	513.158	765.435	1569.68	2300.19	2663.75
102	329.8	1552.9	514.474	766.111	1571.6	2298.54	2658.64
101	329.9	1552.41	515.278	767.736	1574.21	2298.64	2652.61
100	330	1552.48	516.41	768.475	1576.74	2297.5	2645.19
99	330.1	1552.31	516.842	770.208	1577.96	2295.79	2641.5
98	330.2	1551.82	517.838	770.638	1578.87	2295.62	2634
97	330.3	1551.85	518.049	772.727	1580.98	2296.14	2628.7
96	330.4	1551.38	518.889	774.222	1581.84	2294.36	2624.78
95	330.5	1551.27	519.512	775.581	1581.6	2295	2618.7
94	330.6	1551.2	520.476	776.889	1583.8	2294.09	2613.67
93	330.7	1551.27	520.263	778.718	1585.54	2295.32	2609
92	330.8	1550.69	521.25	779.302	1585.66	2295.65	2603.2
91	330.9	1550.6	522.619	780	1587.46	2295	2599.29
90	331	1551.08	522.683	781.429	1588.93	2295.65	2597.1
89	331.1	1550.87	523.077	783.488	1590.74	2295.42	2591.25
88	331.2	1550.67	523.571	784.39	1591.51	2296.25	2585.77
87	331.3	1550.64	523.902	786.111	1593.91	2295.67	2582.61
86	331.4	1550.65	525	787.778	1596.04	2293.72	2577.5
85	331.5	1550.46	525.111	787.692	1595.49	2293.61	2573.1
84	331.6	1551.1	525.556	788.378	1596.23	2293.86	2568.4
83	331.7	1550.04	526.098	789.25	1595.67	2290	2559.71
82	331.8	1550.76	527.647	790.227	1596.29	2290.71	2557.42
81	331.9	1550.56	528	790.952	1596.21	2289.44	2553.61
80	332	1550.49	529.643	791.86	1596.56	2290	2548.79
79	332.1	1550.48	529.655	792.195	1596.21	2288.91	2542.86
78	332.2	1550.41	530.238	793.953	1596.67	2288.57	2538
77	332.3	1550.29	530.93	794.444	1597.2	2287.21	2535.17
76	332.4	1550.33	531.333	796.316	1597.04	2286.04	2530.91
75	332.5	1550.54	531.556	797.222	1597.54	2286.88	2529.12
74	332.6	1550.45	532.444	798.056	1598.54	2286.92	2526.77
73	332.7	1550.19	532.444	799.459	1597.96	2283.56	2521.25
72	332.8	1550.28	532.821	800.625	1597.87	2284.22	2520
71	332.9	1550.1	532.571	800.667	1596.09	2282.83	2518.79
70	333	1550.12	532.5	801.333	1596.04	2281.22	2516.47
69	333.1	1550.1	533.103	802.045	1595.21	2281.8	2513.75
68	333.2	1549.56	533.529	802.857	1594.26	2280	2508.68
67	333.3	1549.83	533.611	803.191	1593.86	2279	2507.35
66	333.4	1549.46	533.714	803.953	1594.9	2275.85	2503.48
65	333.5	1549.28	534.167	803.243	1594.77	2274.36	2500.91
64	333.6	1548.95	534.545	803.81	1595	2272.11	2497.65
63	333.7	1549.16	535.278	803.953	1595.95	2271	2495.64
62	333.8	1548.7	535.278	803.611	1595	2268.78	2492.09
61	333.9	1548.83	535.946	804	1594.39	2265.11	2490
60	334	1548.89	536.286	804	1595.14	2263.41	2487.35
59	334.1	1548.49	536.757	804.5	1594.15	2262.17	2485.33
58	334.2	1547.8	536.452	805.366	1593.81	2258.85	2483.14
57	334.3	1547.79	537.037	805.714	1593.66	2256.43	2480.88
56	334.4	1547.4	539	806.829	1593.02	2253.69	2478.24
55	334.5	1547.56	538.696	807.073	1594.15	2252.38	2477.1
54	334.6	1546.69	538.8	806.905	1592.93	2249.53	2474.33
53	334.7	1546.49	538.571	807.727	1592.8	2246.83	2474.62
52	334.8	1546.33	538.387	808.095	1592.5	2243.85	2473.33
51	334.9	1545.71	538.966	807.442	1590.23	2241.09	2472.29
50	335	1545.6	539.31	807.273	1591.25	2237	2471.71
49	335.1	1545	539.655	808.409	1589.5	2234.93	2470.3
48	335.2	1544.64	540	807.381	1588.64	2231.56	2469.46
47	335.3	1544.23	540	808.889	1588.26	2230.61	2470.25
46	335.4	1543.75	539.231	809.524	1587.27	2229.55	2468.28
45	335.5	1543.1	539.286	809.565	1586.25	2225.69	2466.79
44	335.6	1542.35	539.31	811.136	1585.38	2222.7	2463.89
43	335.7	1542.33	539.31	811.389	1585.78	2221.39	2463.26
42	335.8	1541.38	538.71	812.353	1584.42	2217.39	2460
41	335.9	1540.71	539.062	812.581	1582.93	2215.41	2459.76
40	336	1540.53	537.647	812.955	1583	2213.28	2459.76
39	336.1	1539.66	537.576	813.182	1583.33	2210.53	2458.71
38	336.2	1539.2	537.838	813.778	1581.95	2208.85	2457.65
37	336.3	1538.6	538	813.171	1582.09	2206.4	2456.07
36	336.4	1537.89	537.097	813.421	1581.36	2204.37	2455
35	336.5	1536.88	536.774	814.524	1578.86	2201.15	2453.08
34	336.6	1536.86	537.778	814.25	1578.57	2200.73	2454.32
33	336.7	1536.28	537.037	815.909	1578.05	2196.8	2454.24
32	336.8	1535.72	536.667	816.364	1577.39	2195.07	2452.63
31	336.9	1534.79	536.071	816.585	1576.73	2193.04	2451.25
30	337	1533.76	535.806	818	1574.8	2189.61	2447.89
29	337.1	1533.15	535.667	818.837	1573.83	2188.97	2448.71
28	337.2	1532.44	535.667	818.776	1572.39	2186.1	2446.79
27	337.3	1532.21	535.333	819.273	1570.93	2184.74	2447.03
26	337.4	1531.44	534.706	820	1570.71	2182.79	2445.56
25	337.5	1530.61	534.286	820.87	1570.77	2181.85	2443.64
24	337.6	1529.6	533.333	821.633	1569.42	2180.18	2441.33
23	337.7	1528.68	533.438	822.222	1570	2177.12	2440.29
22	337.8	1527.75	533.333	822.642	1569.07	2175.65	2436.49
21	337.9	1526.72	533.333	823.469	1568.65	2174.44	2436.88
20	338	1526.34	533.226	823.75	1566.81	2173.97	2438.57
19	338.1	1525.19	533.333	824.8	1565.5	2172.54	2435.68
18	338.2	1524.81	533.793	826.275	1564.05	2171.25	2436.25
17	338.3	1524.03	534.138	827.091	1563.26	2169.53	2435.29
16	338.4	1523.18	534.074	827.551	1561.86	2167.3	2435.45
15	338.5	1522.42	535.417	828.302	1560.98	2166.72	2435.6
14	338.6	1522.12	534.583	830.37	1561.06	2166	2434.23
13	338.7	1520.48	534.545	830.392	1559.8	2162.59	2431.2
12	338.8	1519.85	534.5	830.816	1559.77	2162.3	2430.42
11	338.9	1518.9	535.263	832.542	1559.33	2160.75	2429.66
10	339	1518.72	535.263	832.041	1560.38	2160.91	2429.33
9	339.1	1517.94	534.211	832.273	1559.53	2158.75	2430.95
8	339.2	1516.7	533.889	832.34	1559.56	2157.73	2427.78
7	339.3	1515.93	535.625	832.955	1556	2158	2429.2
6	339.4	1514.87	535	833.778	1554.91	2156.27	2429.26
5	339.5	1514.14	533.75	833.721	1553.28	2156.92	2430
4	339.6	1512.92	533.913	833.488	1552.46	2154.91	2429.23
3	339.7	1512.2	533	833.404	1551.48	2153.27	2428.33
2	339.8	1511.66	532.727	834.667	1550.43	2153.06	2430.69
1	339.9	1511.23	532	834.889	1551.21	2153.64	2431.6
0	340	1510.27	532.632	835.417	1551.07	2152.35	2433.23

## Sheet: alkalinity
	age	mean	5	16	50	84	95
750	265	1800.28	697.692	991.02	1786.61	2637.45	2952.08
749	265.1	1800.29	696.786	990.217	1783.79	2642.04	2954.4
748	265.2	1800.76	695.667	988.333	1782.22	2645.36	2959.26
747	265.3	1800.54	695.333	986.41	1778.57	2649.29	2968
746	265.4	1801.22	694.138	985.25	1776.67	2652.56	2971.11
745	265.5	1800.87	692.5	983.243	1774.92	2654.22	2975.67
744	265.6	1801.33	691.071	982.25	1771.9	2656.92	2981.29
743	265.7	1801.65	690.714	980.976	1768.91	2661.8	2987.19
742	265.8	1801.79	689.722	979.762	1767.37	2661.7	2990.37
741	265.9	1801.91	689.429	978.511	1765.54	2664.36	2997.31
740	266	1802.01	689	977.442	1764.46	2667.89	3002.59
739	266.1	1802.28	688	976	1762.5	2670.27	3009.06
738	266.2	1802.7	687.5	975	1760.19	2673.72	3016.67
737	266.3	1802.63	686.774	973.721	1757.41	2676.05	3023.71
736	266.4	1802.88	686.207	971.622	1755.49	2677.44	3029.63
735	266.5	1802.74	685.294	970.571	1753.64	2678.75	3034.8
734	266.6	1803	685	971	1752.14	2680.86	3038.24
733	266.7	1803.23	683.784	969.73	1750	2685.45	3044.48
732	266.8	1803.5	683.056	969.167	1749.07	2687.84	3049.6
731	266.9	1803.37	682.059	967	1747.78	2690.51	3053.91
730	267	1803.58	681.795	966.757	1746.1	2692.09	3056.09
729	267.1	1803.88	680.811	965.758	1743.67	2695.12	3059.23
728	267.2	1804.43	680.645	965.484	1742.68	2699.47	3064.5
727	267.3	1804.22	679.286	964.074	1740.93	2702.12	3066.36
726	267.4	1804.15	679.286	962.333	1739.77	2702.25	3068.97
725	267.5	1804.68	677.742	962.333	1738.2	2705.5	3073.53
724	267.6	1805	677.353	962	1737.66	2707.06	3077.06
723	267.7	1805.28	676.774	961.765	1736	2709.19	3079.62
722	267.8	1805.22	677.059	961.515	1734.53	2710.29	3082.73
721	267.9	1805.46	676.774	960.833	1734.36	2712.12	3087.06
720	268	1805.68	676.364	960.263	1733.39	2713.25	3090.63
719	268.1	1805.89	675.938	960.27	1732.81	2715.95	3093.33
718	268.2	1805.88	675.294	959.722	1732.63	2717.35	3096.15
717	268.3	1806.19	675.294	958.947	1732.12	2719.09	3097.5
716	268.4	1806.47	675.143	958.421	1730.2	2720.91	3101.11
715	268.5	1806.42	675.294	958.286	1728.3	2720.62	3102.5
714	268.6	1807	674.857	958.286	1728.98	2722.43	3104.67
713	268.7	1807.42	674.571	956.944	1727.02	2724.52	3108.12
712	268.8	1807.43	674.857	956.757	1726.92	2724.76	3106.88
711	268.9	1807.33	674.722	957.027	1725.8	2725.45	3110
710	269	1807.81	675	956.5	1725.83	2726.9	3112.78
709	269.1	1808.19	675	956.944	1725.4	2728.3	3113.2
708	269.2	1808.05	675.455	956.579	1726.25	2728.97	3112.5
707	269.3	1808.61	675.714	957.895	1725.32	2728.89	3114.76
706	269.4	1808.59	675.455	958.235	1724.51	2730.24	3115
705	269.5	1809.04	676	957.5	1723.78	2731.67	3117.06
704	269.6	1809.3	676.765	958.108	1723.66	2732.62	3118.33
703	269.7	1809.6	676.897	958.649	1723.81	2732.97	3119.5
702	269.8	1809.57	676.774	958.421	1723.5	2734.52	3119.44
701	269.9	1810.32	677.5	959.25	1723.64	2734.88	3118.4
700	270	1810.32	678.571	960.263	1723.33	2735.12	3119.6
699	270.1	1810.45	678.148	960.541	1723.33	2735.61	3121.9
698	270.2	1810.8	678.8	960.789	1723.33	2736.98	3123.33
697	270.3	1811.59	678.846	961.75	1724.15	2738.97	3123.81
696	270.4	1811.48	679.167	961.842	1723.42	2738.75	3123.68
695	270.5	1812.06	679.655	962.368	1724.72	2740.32	3121.54
694	270.6	1812.7	681.071	963.5	1725.88	2741.21	3124.71
693	270.7	1812.67	680.714	963.409	1724.72	2741.67	3126.36
692	270.8	1813.22	681.379	964.545	1725.59	2742.33	3126.84
691	270.9	1813.79	681.538	964.595	1726.67	2743.45	3127.37
690	271	1813.6	682.593	965.116	1726.1	2744.83	3130
689	271.1	1814.02	683.548	965.946	1726.6	2744.57	3128.64
688	271.2	1814.68	683.929	966.098	1727.83	2746.25	3128.75
687	271.3	1814.99	684.667	967.105	1728.68	2747.14	3130
686	271.4	1815.43	685.172	968.056	1728.94	2749.03	3131.14
685	271.5	1815.67	685.667	968.5	1730	2749.09	3130.37
684	271.6	1816.29	686	969.756	1730.38	2750	3129.13
683	271.7	1816.86	686.552	971.081	1731.4	2751	3130.42
682	271.8	1817.01	688	970.937	1732.22	2750.97	3127.5
681	271.9	1817.87	688.667	972.051	1731.89	2751.92	3129.55
680	272	1818.66	688.75	973.171	1733.89	2753.04	3131.6
679	272.1	1818.78	689.375	974.211	1733.41	2755	3130.48
678	272.2	1819.27	690	975.122	1735	2755.2	3130.83
677	272.3	1819.63	691.429	975.641	1737.57	2755.45	3129.55
676	272.4	1820.09	691.25	976	1737.5	2757.2	3130.43
675	272.5	1820.45	691.765	976.667	1739.71	2758.52	3129.58
674	272.6	1821.25	692.414	976.765	1740.41	2759.67	3131.48
673	272.7	1821.53	692.857	977.5	1741.15	2760	3128.57
672	272.8	1822.1	692.857	978.824	1741.84	2759.73	3128.7
671	272.9	1822.81	692.963	978.857	1743.4	2761.29	3130.36
670	273	1823.18	693.793	978.684	1744.32	2761.03	3130.37
669	273.1	1823.65	693.929	979.714	1744	2763.24	3128.64
668	273.2	1823.79	693.571	980.263	1745.2	2762.19	3128.33
667	273.3	1824.72	694.667	980.323	1746.34	2763.24	3128.5
666	273.4	1825.19	694.516	980.303	1747.5	2763.12	3126.32
665	273.5	1825.58	695	980	1748.84	2762.41	3124.35
664	273.6	1826.23	695	981.143	1749.57	2763.33	3123.91
663	273.7	1826.82	695.278	981.176	1750.89	2762.81	3119.63
662	273.8	1827.39	695.429	981.143	1751.03	2763.87	3122.63
661	273.9	1828.32	696.129	981.765	1751.54	2766.67	3122.86
660	274	1828.29	695.556	980.968	1753.26	2765.9	3122.78
659	274.1	1828.49	695.714	980.345	1753.41	2765.61	3122.5
658	274.2	1829.24	695.882	981.25	1754.62	2766.67	3123
657	274.3	1829.64	695.278	980.323	1754.42	2767.88	3125
656	274.4	1830.54	695.714	981.176	1755	2768.75	3124.4
655	274.5	1830.94	695.143	980.909	1755.9	2769.41	3125.19
654	274.6	1831.1	694.857	980.588	1756.11	2770.59	3126.43
653	274.7	1831.82	694.857	980.588	1756.67	2772.89	3129.58
652	274.8	1831.91	694.571	980.833	1755.68	2773.59	3131.67
651	274.9	1832.15	694.412	981.22	1756.25	2773.72	3132.69
650	275	1833.03	694.412	980.93	1756.29	2776.05	3137.89
649	275.1	1833.17	693.939	980.909	1755.64	2778.48	3137.14
648	275.2	1833.78	693.333	980.238	1755.41	2780.88	3138.7
647	275.3	1834.36	692.593	978.205	1753.81	2783.43	3144.09
646	275.4	1834.39	692.143	977.297	1753.17	2784.38	3144.35
645	275.5	1834.6	691.25	977.027	1753.26	2786.67	3146.84
644	275.6	1835.22	690.741	975.938	1752.77	2789.14	3152.38
643	275.7	1835.04	691.333	975.938	1751.46	2790	3154.12
642	275.8	1835.66	690.645	974.595	1750.44	2795.43	3158.82
641	275.9	1835.71	690.588	973.611	1750.55	2796.86	3160.56
640	276	1835.89	690.571	972.439	1748.05	2800	3167.5
639	276.1	1836.08	687.619	971.75	1747.27	2804.67	3173.16
638	276.2	1836.09	686.957	970.263	1745.68	2809.58	3175
637	276.3	1836.32	686.19	968.421	1744.29	2813.44	3180.56
636	276.4	1836.57	684.167	967.179	1742.5	2817.41	3184.37
635	276.5	1836.67	683.077	965.714	1740.23	2820.91	3191.11
634	276.6	1836.38	681.379	963.158	1740.2	2823.13	3196.67
633	276.7	1836.42	680.938	961.176	1737.8	2826.07	3204.12
632	276.8	1836.11	678.621	958.857	1734.68	2830	3211.18
631	276.9	1836.21	677.143	957.429	1733.11	2833.64	3218.33
630	277	1836.14	675.135	955	1731.28	2838.33	3226.11
629	277.1	1835.98	673.784	953.077	1728.33	2841.76	3232
628	277.2	1835.48	671.562	950.909	1725.85	2844.4	3240
627	277.3	1835.46	669.412	948.293	1722.79	2849.17	3246.8
626	277.4	1834.89	667.838	945.778	1719.76	2852	3256.15
625	277.5	1834.57	665.588	942.708	1717.65	2856.4	3265.45
624	277.6	1834.12	664.062	940.455	1713.26	2859.64	3272.61
623	277.7	1833.59	662	937.059	1709.52	2864.81	3281.36
622	277.8	1833.28	659.474	934.857	1705.38	2867.6	3290
621	277.9	1832.76	658.235	931.579	1700.75	2873.08	3300.45
620	278	1832.18	655.161	928.621	1696.75	2878.71	3308.1
619	278.1	1831.6	652.571	924.211	1692.37	2883	3317.22
618	278.2	1830.92	649.762	920.857	1688.78	2890.56	3326.67
617	278.3	1830.2	647.5	916.552	1685.75	2897.14	3336.92
616	278.4	1829.55	646.098	912.632	1681.09	2904	3346
615	278.5	1828.75	643.488	908.108	1675.26	2910.4	3358.46
614	278.6	1827.82	640.513	903.235	1670.91	2915.26	3366.88
613	278.7	1826.74	637.179	899.091	1665.76	2922.59	3376.32
612	278.8	1826.09	634.857	895	1659.12	2928.57	3389.13
611	278.9	1824.94	630.588	890.976	1655.12	2935	3399.5
610	279	1824.09	628.485	885.526	1648.6	2941	3412.86
609	279.1	1823.23	623.939	881.667	1644	2946.19	3423.57
608	279.2	1822.08	620.789	876.842	1639.51	2950.53	3435
607	279.3	1821.05	617	870.87	1634.29	2955.65	3445.62
606	279.4	1819.84	613.261	866.25	1627.89	2961.74	3456.43
605	279.5	1819	610.444	861.333	1622.34	2967.62	3470
604	279.6	1817.68	606.545	857.2	1612.75	2972.11	3481.33
603	279.7	1816.34	602.955	851.875	1605.41	2978.28	3493.13
602	279.8	1815.21	599.583	846.792	1597.83	2984.78	3504.29
601	279.9	1814.16	596.222	842.143	1593.18	2992.5	3512.67
600	280	1812.73	593.256	837.436	1586.38	3000	3524.67
599	280.1	1811.5	589.167	832.368	1581.03	3006.43	3534.12
598	280.2	1810.32	585.87	827.2	1575	3013.18	3542.86
597	280.3	1808.97	582.245	822.75	1569.5	3018.13	3551.88
596	280.4	1807.72	579.362	818.163	1564.9	3023.53	3562.78
595	280.5	1806.23	576.596	812.791	1559.18	3030.4	3571.76
594	280.6	1805.24	572.381	809	1554.19	3036.5	3582.63
593	280.7	1803.69	569.111	804.186	1549.5	3040	3592.67
592	280.8	1802.21	565.333	798.776	1544	3045	3602.14
591	280.9	1801.07	562.439	794.898	1539.32	3050	3610.83
590	281	1799.69	559.167	788.8	1533.82	3053.53	3620.67
589	281.1	1798.3	555.833	784.13	1531.4	3059.41	3630
588	281.2	1796.71	551.765	778.431	1526.19	3063.5	3636.87
587	281.3	1795.48	549.333	775.349	1520	3066.32	3645.33
586	281.4	1793.91	545	770.217	1515.12	3071.18	3653.57
585	281.5	1792.67	541.562	765.814	1511.09	3075	3664.29
584	281.6	1791.25	538.148	760.87	1506.17	3076.88	3673.85
583	281.7	1789.83	534.643	756.923	1501.78	3080	3682
582	281.8	1788.41	530.345	752.642	1497.95	3084.55	3690
581	281.9	1787.33	527.188	748.537	1494.63	3088.18	3696.15
580	282	1785.78	523.636	742.941	1492.44	3090	3703.53
579	282.1	1784.45	520.606	737.872	1488.86	3094.55	3710.67
578	282.2	1783.13	516.757	733.913	1484.86	3096.92	3716.67
577	282.3	1781.6	512.857	728.302	1481.79	3100	3724
576	282.4	1780.37	509.474	724.082	1478.44	3102.94	3730
575	282.5	1779.11	506.176	720.8	1474.22	3105.45	3738.67
574	282.6	1777.94	502.162	716.5	1471.35	3108.18	3744.74
573	282.7	1776.41	499.667	712.083	1468.92	3110.67	3751.88
572	282.8	1775.1	495.5	707.955	1465.33	3112.78	3757.62
571	282.9	1773.82	491.628	702.826	1462.27	3116	3767.69
570	283	1772.61	487.209	699.2	1459.03	3118.1	3773.33
569	283.1	1771.43	484.792	695	1455	3121	3781.54
568	283.2	1770.07	481.143	689.815	1451.89	3122.35	3786.67
567	283.3	1768.87	477.333	686.75	1448.93	3125	3792.86
566	283.4	1767.6	474.468	682.889	1444.12	3127.5	3796.67
565	283.5	1766.41	472.5	679.767	1440.94	3128.75	3802.22
564	283.6	1765.25	469.744	676.304	1438.89	3130.56	3808.33
563	283.7	1764.04	466.222	673.333	1435	3132.22	3810.91
562	283.8	1762.96	464.167	669.773	1432.93	3134.12	3816
561	283.9	1761.8	462.222	667.429	1430.71	3135.56	3821.67
560	284	1760.65	458.889	664.222	1427.11	3136.11	3824.67
559	284.1	1759.52	456.25	660.577	1425	3137.37	3827.27
558	284.2	1758.37	453.636	657.297	1423.19	3138.18	3830
557	284.3	1757.43	450.8	653.111	1421.02	3142.86	3836.67
556	284.4	1756.29	448.913	649.388	1418.42	3144	3838.33
555	284.5	1755.23	446.444	646.75	1415.11	3144.71	3843.33
554	284.6	1754.2	444.565	643.143	1413.54	3146.15	3847.5
553	284.7	1753.26	441.778	641.111	1411.09	3148.33	3849.23
552	284.8	1752.31	438.75	638.846	1409.02	3148.46	3856
551	284.9	1751.37	437.4	636.481	1407.27	3151.33	3860
550	285	1750.37	435	633.542	1405	3152.67	3860
549	285.1	1749.51	433.265	631.887	1402.94	3153.57	3870
548	285.2	1748.47	430.833	628.947	1400.88	3153.33	3870
547	285.3	1747.74	429.13	627.115	1398.75	3153.75	3870
546	285.4	1746.84	427.447	625.094	1397.08	3154.62	3877.5
545	285.5	1746.06	425.686	623.22	1396	3155	3880
544	285.6	1745.23	423.396	621.429	1395	3156.67	3884
543	285.7	1744.5	422.414	619.808	1393.03	3157.69	3886.67
542	285.8	1743.71	421.186	617.647	1390.32	3158.33	3888.33
541	285.9	1743.01	419.737	615.098	1389.8	3158.33	3892.5
540	286	1742.24	416.222	612.982	1388.91	3159.17	3894.29
539	286.1	1741.63	414.8	611.786	1387.5	3160	3896.67
538	286.2	1740.9	413.529	610.179	1386.67	3160	3900.83
537	286.3	1740.29	412.632	608.462	1385.53	3160	3901
536	286.4	1739.74	411.803	606.667	1383.86	3160	3901.25
535	286.5	1739.28	411.094	605.614	1383.18	3160.83	3903.33
534	286.6	1738.71	408.857	603.519	1382.55	3161.54	3906.67
533	286.7	1738.25	407.436	602.264	1381.74	3161.67	3907.27
532	286.8	1737.77	406.585	601.765	1380.47	3161	3907.27
531	286.9	1737.36	404.8	601.273	1379.55	3161	3908.33
530	287	1736.92	404.259	600.526	1378.3	3161	3910
529	287.1	1736.57	403.529	598.621	1377.5	3161.11	3911.11
528	287.2	1736.26	403.077	597.667	1377.55	3161.25	3912.22
527	287.3	1735.91	401.731	596.885	1377.11	3161.25	3913.75
526	287.4	1735.69	401.296	596.333	1377.02	3161.25	3914.44
525	287.5	1735.49	400.2	595.833	1376.33	3162.22	3915
524	287.6	1735.29	399.787	595.517	1376.25	3163	3916.25
523	287.7	1735.19	399.592	595.345	1375.74	3163.33	3920
522	287.8	1735.11	398.98	595.179	1375.21	3163.33	3920
521	287.9	1735.06	398.6	594.828	1374.89	3163.33	3920.83
520	288	1735.04	398.571	594.737	1374.69	3163.33	3920.77
519	288.1	1735.11	398.367	594.464	1374.89	3163.33	3920.83
518	288.2	1735.11	398.125	593.684	1375.1	3163.33	3920.71
517	288.3	1735.25	398.667	594.211	1375.31	3163.33	3920.67
516	288.4	1735.43	399.091	594.386	1375.62	3163.33	3920.67
515	288.5	1735.66	400	594.364	1375.62	3163.33	3920.67
514	288.6	1735.89	400.357	594.615	1375.51	3163.33	3920.67
513	288.7	1736.27	400.727	595.283	1376.33	3162.5	3920.67
512	288.8	1736.56	401.132	595.741	1376.89	3162.5	3920.67
511	288.9	1736.94	401.569	595.962	1377.83	3163.33	3920
510	289	1737.45	402.609	596.939	1378.84	3163.33	3920
509	289.1	1737.94	402.979	597.778	1379.76	3163.33	3918
508	289.2	1738.51	404.167	598.833	1380.4	3163.33	3915.71
507	289.3	1739.1	405.745	599.516	1380.82	3164.55	3914.29
506	289.4	1739.74	406.744	600.8	1381.46	3164.55	3914.29
505	289.5	1740.53	408.75	601.875	1382.55	3163.57	3911.43
504	289.6	1741.26	409.737	603.898	1384.5	3163.57	3911.11
503	289.7	1742.07	411.5	605.424	1385.47	3163.33	3910.91
502	289.8	1742.99	413.019	607.222	1386.19	3163.33	3910.83
501	289.9	1743.84	414.2	608.833	1387.24	3162.86	3910
500	290	1744.85	415.61	611.042	1389.04	3162.86	3905
499	290.1	1745.9	418.571	613.148	1391.67	3162.5	3903.64
498	290.2	1746.94	420	615.192	1393.48	3162.94	3901.82
497	290.3	1748.03	421.951	617.17	1395	3162.63	3900
496	290.4	1749.38	424.565	620	1397.55	3161.18	3897.14
495	290.5	1750.6	426.889	622.4	1400	3161.18	3893
494	290.6	1751.8	428.704	625.476	1403.41	3161.76	3891.11
493	290.7	1753.08	432.609	628.246	1406.05	3159.17	3888.57
492	290.8	1754.54	435.208	629.873	1409.51	3157.69	3884
491	290.9	1756	438.837	634.915	1413	3157.27	3881
490	291	1757.57	442.653	638.065	1416.25	3155.45	3878.57
489	291.1	1759.08	445.417	641.852	1419.21	3152.5	3872.5
488	291.2	1760.59	449.744	645.156	1421.86	3150.91	3869.09
487	291.3	1762.44	452.895	649.5	1425.41	3149.41	3862.86
486	291.4	1764.07	456.25	654.375	1428.78	3147.06	3859.17
485	291.5	1765.85	459.737	659.667	1432.79	3145.79	3855.45
484	291.6	1767.65	463.421	664.561	1437.11	3145.42	3852.31
483	291.7	1769.51	467.317	670.364	1441.54	3142.22	3846
482	291.8	1771.4	471.19	674.906	1445.43	3141	3842.35
481	291.9	1773.49	476.207	681.333	1450.95	3138	3833.64
480	292	1775.35	480	686.429	1455.33	3135	3830
479	292.1	1777.41	483.158	691.944	1460	3131.88	3820.67
478	292.2	1779.37	489.583	697.949	1463.78	3130	3811.43
477	292.3	1781.65	492.391	704.25	1469.71	3125.29	3802.5
476	292.4	1783.65	496.667	709.434	1473.24	3123.16	3792.67
475	292.5	1785.89	500.244	715.833	1477.69	3120	3784.71
474	292.6	1788.04	504.194	721.463	1483.24	3117.5	3774.74
473	292.7	1790.37	508.788	728.491	1488.11	3114.58	3765
472	292.8	1792.58	513.784	734.902	1493.75	3110.87	3754.12
471	292.9	1794.91	519.63	742.353	1500.24	3105.88	3745.26
470	293	1797.23	523.125	749.434	1505.64	3100	3734.71
469	293.1	1799.56	528.286	757.6	1511.79	3094.29	3723.33
468	293.2	1802.04	533.235	765.833	1516.86	3088.18	3712.94
467	293.3	1804.2	538.056	772.791	1523.16	3084.21	3698.57
466	293.4	1806.75	543.81	780.698	1530.24	3078.33	3685
465	293.5	1809.06	549.687	786.923	1536.36	3073.33	3673.33
464	293.6	1811.63	555.263	793.939	1543.02	3066.32	3657.5
463	293.7	1813.89	559.5	802.051	1550.19	3058	3645.26
462	293.8	1816.25	566.286	810.213	1556.75	3051.43	3631.33
461	293.9	1818.6	570.909	817.073	1563.08	3047.27	3618.82
460	294	1820.88	577	823.958	1571.22	3040.83	3604
459	294.1	1823.56	581.5	830.93	1580	3037.5	3590
458	294.2	1825.7	586.591	837.778	1588.92	3030	3573.33
457	294.3	1828.05	592.889	845.278	1597.44	3021.54	3558.42
456	294.4	1830.42	597.619	853.171	1606.75	3014	3543.57
455	294.5	1832.91	602.703	860.426	1617.39	3004.12	3527.69
454	294.6	1835.06	607.708	864.615	1628.64	2996.11	3512.67
453	294.7	1837.04	612.381	870.263	1640	2985.45	3496.32
452	294.8	1839.19	617.358	876.25	1650.98	2975	3479
451	294.9	1841.59	621.471	882.188	1664.52	2964.09	3464.44
450	295	1843.22	627.838	887.812	1675.68	2951.5	3447.37
449	295.1	1845.32	634.324	893.636	1688.6	2939.13	3433.53
448	295.2	1847.38	639.062	897.826	1699.74	2929.52	3419.33
447	295.3	1849.66	644.737	902.308	1711.35	2916.67	3405.38
446	295.4	1851.55	650.667	906.8	1722.27	2903.64	3391.58
445	295.5	1853.16	654.333	910.606	1732.61	2888.57	3377.27
444	295.6	1854.62	659	916.25	1742.65	2876.9	3361.33
443	295.7	1856.16	660.857	921.579	1751.78	2867.69	3350
442	295.8	1857.91	664.118	925.111	1761.37	2860	3336.5
441	295.9	1859.85	668.214	931.026	1769.53	2847.14	3323.64
440	296	1861.02	671.29	935.25	1776.5	2837.62	3309.38
439	296.1	1862.39	674.375	939.143	1783.64	2825.22	3295.26
438	296.2	1863.98	677.241	942.632	1790.71	2815.71	3282.86
437	296.3	1865.45	680.526	946.316	1800.49	2806.25	3270.71
436	296.4	1866.6	682.353	949.348	1808.84	2797.73	3258.42
435	296.5	1867.66	684.857	953.721	1817.21	2789.58	3246.25
434	296.6	1868.66	687.353	958.14	1824.79	2780	3238.1
433	296.7	1869.27	688.611	961.071	1831.37	2772.5	3227.62
432	296.8	1870.65	691.429	963.696	1838.54	2765.56	3219.63
431	296.9	1871.41	693.667	966.957	1844.36	2760	3210.67
430	297	1872.27	695.385	970.196	1850.85	2756.36	3201.56
429	297.1	1873.23	697.667	972.632	1856.75	2751.28	3195
428	297.2	1873.69	698.788	974.34	1860.24	2746.86	3188.15
427	297.3	1874.26	700	975.472	1864.21	2745	3181.79
426	297.4	1874.73	700.556	976.957	1869.58	2742.08	3175.79
425	297.5	1875.36	701.667	978.222	1872.33	2740	3170
424	297.6	1875.71	702.432	978.837	1874.81	2739.64	3164.17
423	297.7	1875.89	703.659	979.75	1877.1	2738.24	3160.37
422	297.8	1876.3	703.75	980.256	1877.58	2737.37	3156.96
421	297.9	1876.3	703.784	979.348	1877.67	2739.33	3154
420	298	1876.59	704.054	979.2	1879.46	2739.06	3152.07
419	298.1	1876.46	703.415	979.2	1880.24	2740.7	3150
418	298.2	1876.55	703.59	979.375	1879.53	2739.68	3149.26
417	298.3	1876.66	702.75	978.372	1879.49	2740.86	3149.31
416	298.4	1876.73	702.432	977.949	1880.24	2741.56	3151
415	298.5	1876.93	701.75	976.341	1880.48	2742.19	3153.33
414	298.6	1876.19	701.538	975.581	1878.97	2741.82	3155.65
413	298.7	1876.58	700	974.222	1877.5	2744.17	3160
412	298.8	1875.8	699.048	972.708	1875.71	2743.82	3162.4
411	298.9	1875.61	697.674	971.957	1873.55	2744.29	3168.26
410	299	1875.07	696.667	970.444	1872.5	2746.25	3170.83
409	299.1	1875.09	695.581	969.487	1870.62	2748.28	3177.24
408	299.2	1874.4	694.324	966.222	1865.62	2749.12	3185
407	299.3	1874	692.353	964.524	1862.12	2751.38	3191.94
406	299.4	1873.15	690	961.944	1858.15	2753.93	3196.67
405	299.5	1873	688.25	958.974	1855.78	2756.06	3203.04
404	299.6	1872.08	686.842	956.757	1850	2758.67	3208.97
403	299.7	1871.57	685	955.128	1847.56	2762.41	3217.92
402	299.8	1871.43	682	952.683	1843.45	2765	3225.2
401	299.9	1870.39	679.25	949.697	1840.5	2769.44	3232.33
400	300	1869.43	677.25	945.556	1835	2772.76	3240.83
399	300.1	1868.74	674.242	942.553	1831.54	2776.92	3247.6
398	300.2	1868.36	671.622	939.487	1828.85	2783.21	3256.15
397	300.3	1867.47	669.722	935.778	1824.25	2789.63	3265
396	300.4	1866.51	667.297	933.585	1819.74	2795.33	3272.61
395	300.5	1866.13	664	930.417	1815.48	2800.33	3282.61
394	300.6	1864.83	662.093	925.278	1811.03	2805.36	3288.67
393	300.7	1863.61	657.895	920.811	1804	2811.79	3300.42
392	300.8	1862.92	655.909	918.421	1799.39	2817.08	3311
391	300.9	1862.42	653	915.75	1793.16	2821	3321.11
390	301	1861.04	650.952	912.045	1786.46	2828.18	3328.7
389	301.1	1860.11	647.576	908.78	1782.27	2834.5	3337.5
388	301.2	1859.37	645.714	907.027	1776.89	2840	3350
387	301.3	1858.41	642.564	903.438	1772.14	2847.39	3357.89
386	301.4	1857.43	640.476	900.645	1766.46	2851.79	3368.13
385	301.5	1856.67	637.25	898.235	1761.35	2858.1	3380.91
384	301.6	1855.93	635	895.517	1756.75	2863.6	3389.09
383	301.7	1854.54	630.667	893.333	1750.26	2867.73	3396.67
382	301.8	1853.59	628.372	890.87	1745	2873.33	3405.38
381	301.9	1852.58	625.714	887.5	1739.76	2877.5	3412.86
380	302	1851.85	623.03	884.194	1735.48	2881.76	3422.14
379	302.1	1850.85	619.744	880.588	1730.79	2888.46	3430
378	302.2	1849.76	618.056	877.5	1726.67	2893.91	3440
377	302.3	1848.77	615.122	874.412	1720.56	2900.5	3443.75
376	302.4	1847.93	613.947	872.414	1716.05	2903.75	3453
375	302.5	1847.06	610.789	869.302	1711.3	2910.59	3459.41
374	302.6	1846.24	608.667	868.5	1706.73	2916.67	3467.14
373	302.7	1845.22	606.429	865.455	1703.19	2922.5	3471.67
372	302.8	1844.19	604.474	863.947	1699.49	2926.84	3480
371	302.9	1843.55	603.158	862.222	1695.28	2931.05	3486.67
370	303	1842.66	601.395	860.769	1691.43	2934.29	3492.38
369	303.1	1842.04	600	858.75	1686.3	2937.6	3497.65
368	303.2	1840.87	598.235	855.758	1682.39	2941.58	3503.33
367	303.3	1840.18	595.714	854.848	1678.57	2946.84	3510
366	303.4	1839.43	593.824	853.448	1674.29	2948.75	3515.38
365	303.5	1838.39	591.29	852.121	1670.68	2951.58	3521.33
364	303.6	1837.81	589.565	850.857	1666.28	2953.64	3526.36
363	303.7	1837.02	588.049	847.879	1662.5	2957.22	3530
362	303.8	1836.44	586	847.333	1659.22	2960	3536.25
361	303.9	1835.74	584.878	845.769	1656.96	2961.25	3539.33
360	304	1835.01	584.474	844.8	1654.09	2965.29	3542.5
359	304.1	1834.18	582.895	843.333	1652.05	2966.11	3547.86
358	304.2	1833.88	581.351	842.593	1648.94	2967.65	3550
357	304.3	1833.32	580	841.111	1646.67	2970	3553.64
356	304.4	1832.43	578.974	840.606	1644.77	2970.45	3557.69
355	304.5	1831.99	577.941	839.6	1643.33	2971.18	3558.57
354	304.6	1831.38	576.286	838.636	1640.95	2972.67	3560.67
353	304.7	1830.86	575.312	836.667	1638.75	2972.86	3563.75
352	304.8	1830.46	573.871	835.833	1637.8	2973.08	3567.14
351	304.9	1829.7	573.333	834.231	1635.75	2973.57	3567.08
350	305	1829.18	571.071	831.923	1633.43	2974.17	3570
349	305.1	1828.82	570.69	831.111	1632.75	2974.17	3570
348	305.2	1828.22	570	830.385	1630.81	2974.67	3573.33
347	305.3	1827.97	569.375	829.355	1630.3	2974.67	3574.62
346	305.4	1827.53	569.149	828.929	1629.23	2974.62	3576
345	305.5	1827.2	568.837	828	1628.97	2975.38	3580
344	305.6	1826.73	567.755	827.241	1627.56	2976	3580
343	305.7	1826.48	567.273	826.552	1627.17	2976.36	3581.18
342	305.8	1826.18	567.5	825.938	1626.47	2976	3580
341	305.9	1825.62	567.333	825.152	1625.87	2975.83	3580
340	306	1825.38	566.809	824.857	1625.2	2976.67	3579.17
339	306.1	1824.94	566.512	823.714	1624.6	2976	3578.57
338	306.2	1824.72	566.304	822.973	1624.29	2974.29	3580.77
337	306.3	1824.55	566	822.571	1623.75	2973.85	3580
336	306.4	1824.21	565.417	821.176	1622.98	2973.75	3580
335	306.5	1824.04	565.625	820.606	1623.72	2973.16	3580
334	306.6	1823.88	565.294	819.655	1622.83	2972.35	3580
333	306.7	1823.55	565.192	819.259	1623.12	2971.05	3579.17
332	306.8	1823.33	565.094	819.259	1622.61	2971.05	3579.09
331	306.9	1823.2	564.717	817.692	1622.73	2969.47	3580
330	307	1823.02	564.706	818.846	1621.59	2968.57	3580
329	307.1	1822.63	564.681	816.774	1620.79	2968.33	3580
328	307.2	1822.66	564.255	816.897	1621.03	2967.22	3580.83
327	307.3	1822.54	564	816.923	1620.49	2966.19	3582
326	307.4	1822.44	564.186	817.2	1620	2965.79	3580
325	307.5	1822.29	564	816.786	1620.23	2964.21	3580.71
324	307.6	1822.13	563.617	816.538	1619.09	2964.44	3580.71
323	307.7	1822.07	563.409	816.071	1619.43	2962.31	3580.77
322	307.8	1822.08	563.256	816.129	1618.92	2962.5	3577.5
321	307.9	1822.08	563.864	816.562	1619.68	2961.33	3580
320	308	1821.96	563.488	815.938	1619.38	2961.43	3574.29
319	308.1	1821.91	563.056	816.176	1618.12	2960	3575.45
318	308.2	1821.91	563.143	816.667	1618.53	2959.47	3575
317	308.3	1821.98	563.158	816.471	1618.75	2960.71	3572
316	308.4	1821.98	563.243	816.97	1618.82	2959.29	3570
315	308.5	1821.98	563.143	816.97	1617.71	2960.67	3572
314	308.6	1821.85	563.125	816.667	1617.81	2959.41	3569.47
313	308.7	1821.98	563.077	816.471	1618.33	2960	3569.44
312	308.8	1822.06	563.947	817.143	1618.18	2959.29	3569.41
311	308.9	1822.19	563.415	817.333	1618.33	2958.67	3569
310	309	1822.21	563.659	817.667	1617.27	2960	3568.95
309	309.1	1822.5	563.333	816.97	1617.5	2960	3569.55
308	309.2	1822.13	563.488	818.333	1616.18	2961.25	3569
307	309.3	1822.22	563.333	817.742	1617.14	2961.67	3568.64
306	309.4	1822.48	563.333	818.125	1617.71	2961.58	3569.52
305	309.5	1822.65	564.13	818.387	1617.74	2961.58	3571.67
304	309.6	1822.58	563.6	818.276	1616.39	2962	3572.86
303	309.7	1822.84	563.2	818.966	1616.67	2961.05	3573.57
302	309.8	1822.93	563.542	818.929	1615.53	2960.59	3574.62
301	309.9	1822.98	563.333	819.643	1615.37	2961.5	3576
300	310	1823.15	563.617	819.655	1615.14	2960	3577.69
299	310.1	1823.43	562.75	820	1615.5	2961.67	3580
298	310.2	1823.4	562.75	820.625	1615.13	2960.71	3580.83
297	310.3	1823.64	561.842	820.909	1615.53	2961.88	3580.83
296	310.4	1823.68	561.795	821.471	1615.14	2960	3583.33
295	310.5	1823.89	561.75	821.944	1615.12	2961.88	3584
294	310.6	1824.35	561.795	822.121	1615.26	2962.78	3585.33
293	310.7	1824.2	561.316	822.759	1615.26	2962.86	3586
292	310.8	1824.55	561.081	822.903	1614.89	2963.13	3586.43
291	310.9	1824.72	560.789	823.939	1615	2964.71	3588.18
290	311	1824.96	560.27	824.062	1614.68	2965.33	3590
289	311.1	1824.92	560.488	825.152	1615.11	2964.67	3589.23
288	311.2	1825.07	559.487	825.161	1613.72	2964.71	3591.43
287	311.3	1825.28	560.238	826.667	1613.95	2965	3594
286	311.4	1825.44	559.714	826.667	1614.19	2965.29	3594
285	311.5	1825.73	559.167	826.97	1614.05	2965.62	3594.55
284	311.6	1825.86	559.143	827.5	1614.25	2966	3595.45
283	311.7	1826.18	558.158	828.182	1614.65	2966.67	3593
282	311.8	1826.48	556.75	829.091	1614.89	2966.84	3595.56
281	311.9	1826.45	557	829	1614.67	2965.79	3597.78
280	312	1826.41	555.952	828.71	1614.55	2966.32	3597.27
279	312.1	1826.76	555.641	829.143	1614.58	2966.11	3598
278	312.2	1827.04	554.884	830.732	1615.42	2966.11	3597.78
277	312.3	1827.32	554.773	831.22	1614.89	2967.5	3599.23
276	312.4	1827.37	554.545	831.053	1614.62	2967.33	3600
275	312.5	1827.68	553.846	831.842	1614.36	2967.06	3601.88
274	312.6	1827.77	552.162	832.647	1615.41	2966.47	3603
273	312.7	1828.06	552	833.548	1615	2967.33	3603.33
272	312.8	1828	551.212	833.75	1614.65	2967.06	3605.88
271	312.9	1828.31	549.783	834	1615.12	2967.65	3606.88
270	313	1828.52	548.889	833.939	1615	2967.22	3606.88
269	313.1	1828.71	549.318	835	1614.76	2967.89	3609.23
268	313.2	1829.08	550	835.938	1615.71	2968.24	3610
267	313.3	1829.02	549.375	835.758	1615.53	2967.22	3610
266	313.4	1829.32	548.71	836.25	1615.31	2967.5	3609.29
265	313.5	1829.66	549.615	836.429	1615.31	2968.5	3610
264	313.6	1829.8	548.889	836.071	1615.2	2968.95	3611.33
263	313.7	1829.96	548.065	836.071	1615.96	2968.89	3610.83
262	313.8	1830.1	547.812	836	1615.74	2969.47	3611.11
261	313.9	1830.21	547.027	836.154	1615.92	2969.47	3613.33
260	314	1830.48	546.757	836.538	1616.52	2972.67	3615
259	314.1	1830.6	546.667	837.037	1615.87	2971.54	3614.55
258	314.2	1830.85	545.61	836.786	1616.67	2972.86	3614.55
257	314.3	1831.05	545.61	836.774	1616.67	2973.08	3614
256	314.4	1831.55	545.385	837.273	1617.37	2975.33	3613.33
255	314.5	1831.32	544.878	837.188	1616.05	2973.75	3613.85
254	314.6	1831.59	544.048	836.774	1617	2975.29	3615.83
253	314.7	1831.81	544.211	838	1616.92	2975.33	3615.38
252	314.8	1832.02	543.421	837.931	1617.1	2975.88	3615.71
251	314.9	1832.22	542.703	836.97	1617.07	2976.25	3615.45
250	315	1832.5	542.105	837.419	1616.84	2977.5	3616.92
249	315.1	1832.41	541.765	836.429	1616.25	2977.65	3616.43
248	315.2	1832.59	541.389	837.037	1616.74	2977.78	3617.14
247	315.3	1833.05	540.909	837.308	1617.5	2979.44	3616.92
246	315.4	1833.13	541.351	837.308	1617.17	2980.59	3617.69
245	315.5	1833.33	540	837.037	1617.5	2981.67	3617.69
244	315.6	1833.7	539.394	835.926	1618.54	2983.16	3618
243	315.7	1833.45	539.333	835.652	1617.32	2983.16	3618.67
242	315.8	1833.84	539.286	836.667	1618.04	2984.12	3618.67
241	315.9	1834	539	836.154	1619.05	2984.38	3619.29
240	316	1834.21	538.788	835.862	1618.41	2985.79	3619.38
239	316.1	1834.16	538.438	835.862	1618.57	2985.63	3619.29
238	316.2	1834.66	538.333	836.452	1618.6	2987.86	3620
237	316.3	1834.94	537.931	836.071	1619	2987.5	3620
236	316.4	1834.84	536.667	836	1619.29	2987.86	3621.82
235	316.5	1835.12	536.667	835.484	1619.33	2987.33	3623.33
234	316.6	1835.28	536.071	835.484	1620.26	2987.5	3620
233	316.7	1835.51	535.385	835.714	1620.98	2987.5	3620
232	316.8	1835.58	535.357	835.152	1620.95	2989.23	3620
231	316.9	1836.1	535	834.857	1622	2990.53	3620
230	317	1836.25	534.815	834.857	1621.79	2990.53	3621.25
229	317.1	1836.42	533.704	833.889	1621.71	2991.05	3622
228	317.2	1836.72	534.138	834.324	1622.58	2991.05	3620
227	317.3	1836.97	534	834.595	1622.86	2991.18	3620
226	317.4	1837.27	533.793	834.857	1622.78	2991.11	3620
225	317.5	1837.39	533.226	834.211	1623.16	2991.5	3619.09
224	317.6	1837.68	532.667	834.054	1623.9	2991.5	3617.78
223	317.7	1837.95	532.812	833.889	1624.52	2991.58	3620
222	317.8	1838.23	532.727	834	1625	2992	3618.18
221	317.9	1838.49	532.632	834.118	1625.83	2991.67	3620
220	318	1838.73	532.895	833.784	1626.25	2992.63	3619.09
219	318.1	1839.03	532.895	833.333	1626.81	2993	3621.76
218	318.2	1839.07	532.895	833.889	1627.35	2992.94	3621.33
217	318.3	1839.56	532.286	833.143	1628.64	2993.53	3620.83
216	318.4	1839.66	532.571	833.75	1629.57	2993.53	3621.33
215	318.5	1840.17	532.5	833.226	1629.79	2995.63	3622.31
214	318.6	1840.29	532.188	833.333	1630.88	2994.71	3623.08
213	318.7	1840.44	532.187	833.448	1630.32	2994.74	3624.55
212	318.8	1841.17	532.647	834.4	1632.31	2994.5	3624.55
211	318.9	1841.2	532.222	834.615	1633.53	2993.68	3624.17
210	319	1841.69	533.158	835.185	1634	2993.89	3624.29
209	319.1	1842.09	532.895	835.217	1635.88	2993.57	3625
208	319.2	1842.32	533.333	835.652	1636.84	2993.08	3624.29
207	319.3	1842.79	534.211	835.926	1638.1	2993.57	3623.08
206	319.4	1843.03	533.889	836.522	1639.32	2993.33	3624
205	319.5	1843.47	534.722	836.538	1641.08	2994	3623
204	319.6	1844.14	534.706	837.6	1642.2	2993.48	3623.75
203	319.7	1844.45	535.278	837.391	1643.17	2994	3622.5
202	319.8	1844.66	535.882	837.391	1644.52	2992.38	3620
201	319.9	1845.14	535.833	838.571	1646.09	2992.96	3620.83
200	320	1845.68	537.419	840.227	1647.56	2992.59	3618.33
199	320.1	1846.16	536.774	840.488	1650.37	2992.22	3619.33
198	320.2	1846.6	537.667	841.163	1650.78	2991.15	3622.5
197	320.3	1847.33	539.259	840.952	1652.5	2990	3621.82
196	320.4	1847.43	539.286	841	1652.86	2990.37	3621.67
195	320.5	1848.19	540.541	841.351	1654.71	2988.12	3620
194	320.6	1848.6	541.081	842.105	1655.69	2988.24	3621.25
193	320.7	1849.37	541.944	841.765	1657.5	2988.13	3621
192	320.8	1849.85	542.571	843.243	1658.81	2984.71	3617.86
191	320.9	1850.42	543.333	843.143	1660.53	2983.33	3620
190	321	1851.04	543.871	843.889	1662.63	2982.17	3620.63
189	321.1	1851.42	544.828	845.405	1665.43	2979.29	3618.18
188	321.2	1852.15	546.071	846.757	1666.56	2976.43	3618
187	321.3	1852.96	546.774	846.579	1669.29	2974.17	3615.29
186	321.4	1853.64	548.125	848.158	1671.94	2970	3613
185	321.5	1854.05	548.378	848.947	1672.26	2968.89	3609.33
184	321.6	1854.7	549.459	850	1672.58	2966.67	3608.46
183	321.7	1855.59	552.059	850.345	1673.87	2964.44	3608.75
182	321.8	1856.41	553.448	852.727	1674.83	2963.1	3606.67
181	321.9	1857.17	554.848	853.846	1676.33	2959.17	3604.29
180	322	1857.91	556.061	856.207	1677.78	2956.11	3601.25
179	322.1	1858.67	556.97	857.692	1679.23	2954	3599.38
178	322.2	1859.35	559.286	858.293	1680.54	2953.13	3600
177	322.3	1860.34	561.316	860.571	1684.1	2951.18	3597
176	322.4	1861.06	562.791	862.308	1686.57	2947	3594.62
175	322.5	1861.85	563.333	864.412	1688.46	2944.74	3592.94
174	322.6	1862.78	564.211	866.364	1691.95	2943.68	3590
173	322.7	1863.88	566.129	867.25	1694.32	2942.17	3586.43
172	322.8	1864.59	567.667	868.919	1695.85	2940.4	3581
171	322.9	1865.35	570	871.795	1699.44	2934.67	3577.69
170	323	1866.32	571.515	873.25	1702.65	2932.73	3574.29
169	323.1	1867.33	573	874.545	1705.62	2930.56	3571.82
168	323.2	1868.58	574.483	876.97	1709.38	2928.24	3570
167	323.3	1869.45	576.552	879.444	1712.7	2926.25	3564.74
166	323.4	1870.39	578	880	1715.14	2922.17	3560
165	323.5	1871.57	580.606	883.902	1718.95	2919.57	3556.67
164	323.6	1872.62	581.765	885.278	1721.43	2917.14	3555
163	323.7	1873.37	583.846	888.108	1724.72	2914.62	3549.17
162	323.8	1874.83	585.833	889.412	1729.39	2912.8	3547
161	323.9	1875.7	588.182	892	1732.31	2909.63	3544.29
160	324	1876.89	589.583	894	1736.84	2907.5	3540.83
159	324.1	1877.95	590.645	896.765	1740	2904.33	3534.55
158	324.2	1879.11	591.935	898.966	1744.25	2900	3529.29
157	324.3	1880.68	595.357	901.622	1748.97	2900	3525.38
156	324.4	1881.4	596.552	903.235	1752.95	2896.5	3520
155	324.5	1882.72	598.621	904.848	1754.86	2893.18	3516.67
154	324.6	1884.17	599.722	909.091	1759.71	2890.91	3510.77
153	324.7	1885.63	602.593	910.976	1764.84	2890.74	3506.67
152	324.8	1886.63	604.8	912.308	1768.28	2886.88	3498.67
151	324.9	1887.89	608.696	913.056	1773.6	2883.5	3494.55
150	325	1889.29	611.053	915.143	1780	2880.8	3486.15
149	325.1	1890.92	612.903	917.353	1784.48	2877.83	3484.67
148	325.2	1892.16	615.312	920.857	1789.12	2873.85	3476.5
147	325.3	1893.12	617.714	922.059	1793.89	2871	3472.73
146	325.4	1894.75	620.93	924.286	1800.44	2868.75	3468.33
145	325.5	1896.01	622.326	927.742	1803.33	2866.36	3460
144	325.6	1897.55	624.722	930.571	1809.49	2862.8	3454.44
143	325.7	1899.2	627.368	932.432	1814.38	2860.83	3450
142	325.8	1900.32	630	934.444	1818.91	2857.69	3441.11
141	325.9	1901.9	632.703	937.105	1823.57	2856	3434.55
140	326	1903.22	636.667	939.474	1827.5	2853.48	3428.75
139	326.1	1905.06	638.421	942.162	1832.73	2850.56	3423.33
138	326.2	1906.17	642.162	945	1835.9	2847.14	3417.06
137	326.3	1907.87	645.676	947.941	1840.37	2846.33	3410
136	326.4	1909.38	648.571	950.4	1844.06	2845.22	3406
135	326.5	1910.73	651.75	953.5	1850	2843.2	3400
134	326.6	1912.32	654.255	957.727	1854.69	2842.33	3395.45
133	326.7	1913.74	657.826	960	1859.38	2841.25	3386.67
132	326.8	1915.3	661.132	961.333	1865.38	2840.31	3382.78
131	326.9	1917.23	664.694	963.429	1868.89	2838.33	3376.36
130	327	1918.62	666.809	965.625	1874.85	2834.62	3369.23
129	327.1	1920.38	668.864	969.355	1880.44	2834.09	3362.73
128	327.2	1921.65	672.647	972.5	1882.7	2833.78	3355.83
127	327.3	1923.32	675.429	974.595	1886.56	2833.82	3350
126	327.4	1924.81	677.568	977.778	1891.74	2833.33	3340
125	327.5	1926.73	680	981.053	1894.71	2834.19	3336.25
124	327.6	1928.17	683.182	983.529	1897.81	2833.23	3330
123	327.7	1929.86	685	985.938	1900	2834.75	3325.29
122	327.8	1931.36	687.5	988.824	1904	2834.37	3316.67
121	327.9	1932.9	690	992.571	1906.55	2832.81	3310.67
120	328	1934.62	692.727	994.706	1911.56	2832.42	3305.63
119	328.1	1935.69	695.278	996.774	1915.93	2831.75	3299.44
118	328.2	1937.43	697.949	1000.73	1921.39	2831.46	3296
117	328.3	1938.97	701.818	1002.07	1926.25	2829.5	3289.47
116	328.4	1940.49	705.152	1005.71	1930.28	2829.07	3284.12
115	328.5	1941.98	707.353	1006.97	1935.95	2829.71	3277.62
114	328.6	1943.9	710.476	1010.65	1940.87	2830.86	3271.25
113	328.7	1945.38	712.439	1012.42	1944.88	2832.05	3267.22
112	328.8	1946.92	715.854	1014.24	1947.76	2833.12	3262.5
111	328.9	1948.47	719.394	1017.06	1952.86	2832.31	3254.29
110	329	1950.08	721.429	1018.29	1961.03	2832.86	3247.73
109	329.1	1951.62	722.927	1021.18	1963.9	2833.18	3240.67
108	329.2	1953.04	725	1023.87	1968.84	2832.44	3235
107	329.3	1955.05	727.045	1026.56	1972.77	2833.02	3232.14
106	329.4	1956.16	729.091	1029.71	1976.67	2834.31	3228.57
105	329.5	1958.16	731.136	1032.86	1981.05	2835.48	3225.5
104	329.6	1959.52	735	1035.13	1986.85	2837.14	3220.59
103	329.7	1961	737.273	1036.74	1992	2836.18	3216.25
102	329.8	1962.36	739.714	1039.74	1996.44	2835.43	3211.18
101	329.9	1963.74	742.25	1042.67	1998.73	2835	3205.83
100	330	1965.58	744.242	1044.65	2004.26	2836.5	3201.11
99	330.1	1967.03	745.455	1047	2009.14	2837.45	3200
98	330.2	1968.25	746.857	1048.97	2012.3	2837.55	3191.11
97	330.3	1969.98	747.941	1051.88	2014.42	2839.57	3189.23
96	330.4	1970.93	749.459	1053.62	2017.35	2840.29	3185.22
95	330.5	1972.49	751.667	1056.81	2021.03	2844.39	3180.59
94	330.6	1973.96	753.429	1059.21	2023.88	2844.63	3178.18
93	330.7	1975.46	754.375	1062.05	2027.38	2848.67	3177.14
92	330.8	1976.35	755	1065.15	2031.08	2847.84	3173.89
91	330.9	1977.79	757.419	1066.5	2032.55	2849.7	3172.5
90	331	1979.68	758.378	1068.72	2034.57	2851.92	3172.61
89	331.1	1980.95	759.143	1071.22	2038.16	2853.33	3168.67
88	331.2	1981.88	760.87	1073.42	2039.29	2854.74	3166.07
87	331.3	1983.29	762.5	1077.22	2040.93	2854.63	3166.21
86	331.4	1984.52	764.583	1080.27	2042.93	2853.18	3162.35
85	331.5	1985.47	766.207	1082.22	2043.95	2853.66	3161.11
84	331.6	1987.51	768.519	1083.82	2044.47	2855.95	3159.71
83	331.7	1987.5	770	1085.56	2044.74	2854.78	3155
82	331.8	1989.45	772	1087.86	2046.13	2857.45	3155.48
81	331.9	1990.32	773.5	1089.5	2047.14	2858.25	3152.41
80	332	1991.37	776	1091.54	2047.25	2860.21	3150
79	332.1	1992.44	776.25	1093.93	2047.38	2861.4	3148.53
78	332.2	1993.51	779.6	1097.42	2046.74	2861.86	3146.84
77	332.3	1994.32	781.304	1098.29	2048.48	2863.7	3145.71
76	332.4	1995.25	783.333	1101.29	2047.14	2863.56	3141.82
75	332.5	1996.46	784.545	1103.06	2047.25	2865.45	3142.69
74	332.6	1997.26	786.4	1105.56	2048.29	2867.06	3142.19
73	332.7	1997.66	787.5	1107.3	2047.73	2866.49	3138.42
72	332.8	1998.59	789.333	1109.02	2048.92	2867.27	3138.06
71	332.9	1999.31	789.032	1110.65	2048.75	2867.14	3136.47
70	333	2000	790.968	1112.5	2048.92	2866.09	3133.12
69	333.1	2000.63	792	1113.81	2049.44	2866.94	3130.32
68	333.2	2001.01	792.857	1115.12	2047.11	2866.67	3129.62
67	333.3	2002.05	794.667	1116.36	2048.41	2866.81	3127.93
66	333.4	2002.3	795.714	1116.67	2048.81	2863.78	3125
65	333.5	2002.67	797.037	1117.03	2048.11	2863.67	3123.17
64	333.6	2003.07	798.889	1118.5	2049.46	2861.59	3120.81
63	333.7	2003.94	800.4	1119.75	2050	2860.5	3120
62	333.8	2004	800	1121.32	2051.11	2860.78	3115.83
61	333.9	2004.7	801.579	1122.31	2051.33	2858.26	3114.44
60	334	2005.12	804.783	1124.19	2051.67	2855.28	3112.2
59	334.1	2005.2	805.385	1124.65	2048.78	2854.8	3109.72
58	334.2	2005.01	806.154	1125	2050.45	2851.9	3106.41
57	334.3	2005.46	807.407	1125.43	2048.93	2850.98	3104.24
56	334.4	2005.53	808.214	1126.74	2047.78	2847.2	3101.58
55	334.5	2006.12	809.615	1127.08	2048.79	2846	3100.61
54	334.6	2005.68	811	1128.04	2047.33	2843.21	3100.28
53	334.7	2005.87	812.353	1130.24	2046.13	2839.56	3098.5
52	334.8	2006.09	814.091	1132	2046.18	2839.79	3095.26
51	334.9	2005.75	815.833	1132.63	2045.12	2836.25	3092.76
50	335	2006.1	817.273	1134.15	2045.12	2835.09	3092.31
49	335.1	2005.68	820.333	1136.83	2043.59	2832.13	3090.24
48	335.2	2005.68	819.444	1138.26	2041.62	2828.77	3090.26
47	335.3	2005.46	820.952	1140.22	2041.39	2826.53	3088.68
46	335.4	2005.38	820	1142.2	2043.11	2824.57	3086.67
45	335.5	2004.98	819.63	1143.33	2042	2821.48	3086.22
44	335.6	2004.22	821	1145.81	2040.73	2817.65	3083.14
43	335.7	2004.79	822.917	1147.33	2041.25	2815.83	3083.33
42	335.8	2003.88	823.846	1148.78	2041.25	2811.15	3079.29
41	335.9	2003.21	824.074	1151.19	2039.41	2808.52	3078.29
40	336	2003.46	825.185	1150.88	2039.31	2806.21	3077.75
39	336.1	2002.78	825.517	1153.41	2036.76	2802.08	3075.31
38	336.2	2002.43	825.556	1154.32	2036.67	2800.43	3073.23
37	336.3	2002.06	826.296	1156.67	2035.59	2796.8	3071.79
36	336.4	2001.43	827.6	1159.17	2034.86	2792.68	3066.79
35	336.5	2000.79	827.6	1160.45	2036.21	2788.59	3063.16
34	336.6	2000.87	827.857	1161.43	2035.38	2787.87	3064
33	336.7	2000.28	828.261	1164.05	2035.56	2783.67	3062.8
32	336.8	1999.95	829.2	1165.12	2035.56	2782.3	3060
31	336.9	1999.29	828.966	1165.71	2036.97	2780.98	3057.94
30	337	1998.4	827.812	1169.14	2036.92	2777.6	3054.4
29	337.1	1997.99	828.125	1171.45	2035.31	2775.45	3052
28	337.2	1997.43	828	1172.46	2035.41	2772.58	3050
27	337.3	1997.27	829.333	1173.75	2035.83	2770	3049.71
26	337.4	1996.83	829.31	1174.71	2036.32	2768.45	3049.29
25	337.5	1995.94	831	1176.38	2034.86	2763.75	3046.67
24	337.6	1995.14	830.37	1178.94	2032.93	2762.24	3043.46
23	337.7	1994.4	829.231	1180.61	2034.89	2758.28	3040.34
22	337.8	1993.57	829.231	1181.84	2036	2755.29	3037.33
21	337.9	1992.61	831.304	1184.23	2035.24	2752.5	3037.04
20	338	1992.45	831.739	1185.77	2036.14	2751.15	3038.33
19	338.1	1991.57	831.923	1187.63	2035.28	2748.7	3034.14
18	338.2	1991.27	831.154	1190	2036.05	2747.81	3033.81
17	338.3	1990.8	830.909	1192.29	2037.5	2744.93	3033.46
16	338.4	1990.01	831	1192.83	2036.38	2742.71	3031.67
15	338.5	1989.55	830.588	1195.08	2035.81	2740.93	3030.45
14	338.6	1989.6	831.053	1196.42	2037.18	2740.7	3028.57
13	338.7	1987.9	831.667	1196.3	2036.54	2738.04	3025.24
12	338.8	1987.43	832.308	1197.55	2036.49	2738.16	3024.78
11	338.9	1986.9	832.857	1198.41	2036.17	2739.07	3023.48
10	339	1986.88	833.871	1199.77	2035.34	2737.56	3021.9
9	339.1	1986.14	834	1200.91	2035.65	2736	3021.07
8	339.2	1985.09	834	1201.43	2034.48	2734.5	3018.89
7	339.3	1984.47	834.783	1202.57	2032.67	2733.4	3021.94
6	339.4	1983.79	835	1203.64	2033.39	2730.38	3019.19
5	339.5	1983.2	835.2	1206.11	2032.98	2730.39	3021.92
4	339.6	1982.28	835.6	1206.79	2033.02	2728.54	3019.64
3	339.7	1981.89	835.417	1206.79	2030.38	2726.4	3022
2	339.8	1981.54	835.833	1207.06	2030	2724.76	3021.36
1	339.9	1981.33	835.6	1208.06	2029.64	2725.11	3022.4
0	340	1980.82	835.238	1208.21	2028.97	2724.09	3023

## Sheet: saturation_state
	age	mean	5	16	50	84	95
750	265	5.26995	1.878	2.75593	5.19615	7.943	9.11944
749	265.1	5.25751	1.87286	2.75038	5.17467	7.9287	9.13417
748	265.2	5.24526	1.869	2.74353	5.15429	7.92348	9.13833
747	265.3	5.23339	1.86667	2.7345	5.12857	7.90417	9.13714
746	265.4	5.22178	1.86	2.72286	5.11471	7.88765	9.13143
745	265.5	5.21198	1.85273	2.71412	5.09488	7.872	9.13
744	265.6	5.19988	1.84769	2.70278	5.05919	7.84833	9.13083
743	265.7	5.19001	1.84538	2.695	5.04647	7.84333	9.13154
742	265.8	5.18251	1.84222	2.69118	5.03786	7.84286	9.13
741	265.9	5.17083	1.83778	2.685	5.01344	7.82556	9.11714
740	266	5.16332	1.83333	2.676	5.00267	7.80815	9.116
739	266.1	5.1545	1.82917	2.66867	4.98706	7.80522	9.11818
738	266.2	5.14748	1.82667	2.65762	4.97308	7.80333	9.11643
737	266.3	5.14042	1.82	2.65389	4.96	7.79933	9.11778
736	266.4	5.13121	1.81533	2.64059	4.94412	7.79231	9.11889
735	266.5	5.12431	1.811	2.63294	4.93143	7.78615	9.143
734	266.6	5.12031	1.81	2.62824	4.92632	7.78222	9.1525
733	266.7	5.11344	1.80611	2.61687	4.92053	7.764	9.156
732	266.8	5.10987	1.805	2.6125	4.9125	7.7628	9.16714
731	266.9	5.10251	1.80333	2.605	4.90083	7.752	9.17
730	267	5.10006	1.79929	2.60214	4.89375	7.75	9.18571
729	267.1	5.0946	1.79647	2.591	4.8925	7.736	9.185
728	267.2	5.09175	1.79937	2.58937	4.885	7.72857	9.191
727	267.3	5.08773	1.79471	2.5825	4.87462	7.73	9.19667
726	267.4	5.0853	1.78842	2.578	4.87133	7.731	9.19875
725	267.5	5.08287	1.78933	2.57769	4.86846	7.73	9.2225
724	267.6	5.08396	1.79133	2.57875	4.86467	7.734	9.22667
723	267.7	5.08117	1.78714	2.57267	4.84889	7.735	9.23333
722	267.8	5.07985	1.79	2.56944	4.84185	7.737	9.24167
721	267.9	5.08125	1.78923	2.56944	4.84306	7.74286	9.2575
720	268	5.08083	1.78846	2.5675	4.84038	7.7425	9.26571
719	268.1	5.08094	1.79143	2.56611	4.84	7.73833	9.28
718	268.2	5.08247	1.79214	2.56261	4.84043	7.74	9.285
717	268.3	5.08556	1.792	2.56188	4.84083	7.749	9.28917
716	268.4	5.08694	1.78929	2.54941	4.84194	7.74875	9.31143
715	268.5	5.08867	1.79545	2.55	4.84148	7.7525	9.31625
714	268.6	5.09504	1.79636	2.56435	4.84667	7.75875	9.33333
713	268.7	5.09606	1.798	2.56192	4.84762	7.76294	9.3425
712	268.8	5.10312	1.80154	2.56526	4.86227	7.76684	9.36
711	268.9	5.10384	1.80154	2.56429	4.84679	7.76857	9.36615
710	269	5.10888	1.80667	2.568	4.84935	7.78417	9.38
709	269.1	5.11524	1.80929	2.56937	4.86765	7.7875	9.3925
708	269.2	5.12109	1.81	2.57	4.87	7.80158	9.41333
707	269.3	5.1278	1.81375	2.57687	4.8725	7.80563	9.424
706	269.4	5.13468	1.81556	2.57882	4.88417	7.826	9.44067
705	269.5	5.14133	1.818	2.58294	4.89	7.83556	9.4475
704	269.6	5.14875	1.81929	2.58867	4.89091	7.84421	9.47333
703	269.7	5.1577	1.828	2.59222	4.90333	7.8485	9.48714
702	269.8	5.16486	1.8275	2.59385	4.91	7.86786	9.505
701	269.9	5.17501	1.835	2.60562	4.91857	7.88118	9.51833
700	270	5.18477	1.83923	2.6119	4.92818	7.88632	9.537
699	270.1	5.19306	1.84368	2.61611	4.93125	7.91	9.55
698	270.2	5.2038	1.85	2.62063	4.9375	7.92067	9.56667
697	270.3	5.21509	1.85278	2.62739	4.94143	7.9425	9.58667
696	270.4	5.22425	1.858	2.63529	4.94765	7.954	9.6
695	270.5	5.2375	1.86278	2.63818	4.95538	7.97667	9.61429
694	270.6	5.25075	1.87129	2.65211	4.96765	7.99429	9.63667
693	270.7	5.25987	1.87333	2.65875	4.9775	8.02083	9.656
692	270.8	5.27335	1.8724	2.67077	4.992	8.03	9.67
691	270.9	5.28742	1.87613	2.677	5.01	8.03941	9.68667
690	271	5.29876	1.88	2.68615	5.01208	8.07143	9.69778
689	271.1	5.31231	1.88393	2.69636	5.03143	8.095	9.72
688	271.2	5.32435	1.8875	2.70562	5.04176	8.11	9.735
687	271.3	5.33928	1.895	2.71526	5.054	8.135	9.755
686	271.4	5.35178	1.90158	2.72529	5.07222	8.15714	9.774
685	271.5	5.36625	1.907	2.73556	5.085	8.18	9.8
684	271.6	5.38038	1.92308	2.75	5.09424	8.202	9.81444
683	271.7	5.3964	1.93	2.75458	5.11625	8.225	9.83
682	271.8	5.41241	1.93286	2.77208	5.12923	8.24875	9.84667
681	271.9	5.42519	1.94077	2.77821	5.14083	8.26125	9.85714
680	272	5.43957	1.9475	2.79432	5.15818	8.2775	9.86571
679	272.1	5.45256	1.95462	2.79857	5.16867	8.3075	9.89333
678	272.2	5.46906	1.9605	2.81652	5.19083	8.32556	9.912
677	272.3	5.48623	1.96562	2.83	5.204	8.347	9.925
676	272.4	5.49842	1.96833	2.83529	5.21786	8.36227	9.93778
675	272.5	5.51281	1.9725	2.84643	5.23	8.3825	9.94643
674	272.6	5.52903	1.98143	2.85444	5.25077	8.39889	9.97125
673	272.7	5.54329	1.98556	2.86375	5.2625	8.421	9.985
672	272.8	5.55996	1.99	2.87429	5.284	8.43769	9.99917
671	272.9	5.57308	2.0004	2.88647	5.29556	8.45125	10.012
670	273	5.58704	2.0035	2.89714	5.305	8.46733	10.026
669	273.1	5.60091	2.00667	2.90571	5.32125	8.4925	10.0369
668	273.2	5.61394	2.00895	2.90937	5.3408	8.5025	10.0533
667	273.3	5.63	2.02261	2.925	5.36235	8.51833	10.0683
666	273.4	5.64208	2.02364	2.92333	5.37462	8.53267	10.0875
665	273.5	5.65391	2.0255	2.93444	5.38722	8.55	10.098
664	273.6	5.66812	2.02611	2.94	5.409	8.56667	10.1121
663	273.7	5.68027	2.041	2.95286	5.42053	8.58125	10.1192
662	273.8	5.69119	2.043	2.95833	5.43214	8.59909	10.1433
661	273.9	5.70057	2.04833	2.96937	5.44	8.61	10.1525
660	274	5.7102	2.05	2.96941	5.44714	8.61929	10.17
659	274.1	5.71794	2.054	2.97625	5.45556	8.64182	10.1875
658	274.2	5.72976	2.059	2.98444	5.47083	8.65	10.197
657	274.3	5.73625	2.062	2.992	5.46857	8.66222	10.2125
656	274.4	5.74618	2.06182	2.99923	5.47733	8.67143	10.2327
655	274.5	5.75429	2.062	3.00286	5.482	8.68333	10.2467
654	274.6	5.7597	2.06	3.00368	5.47833	8.691	10.267
653	274.7	5.76346	2.058	3.00516	5.49333	8.69	10.2717
652	274.8	5.76665	2.05625	3.00593	5.49167	8.695	10.2836
651	274.9	5.7719	2.055	3.00593	5.49417	8.69706	10.3118
650	275	5.77564	2.05538	3.0085	5.49632	8.71167	10.3156
649	275.1	5.77732	2.05364	3.00773	5.48778	8.72	10.329
648	275.2	5.77745	2.051	3.00792	5.48769	8.728	10.3375
647	275.3	5.77775	2.04867	3.00789	5.48538	8.73	10.3386
646	275.4	5.77675	2.04733	3.00577	5.47429	8.73444	10.352
645	275.5	5.77446	2.04556	3.005	5.46786	8.73091	10.3525
644	275.6	5.77189	2.04062	2.99889	5.45818	8.722	10.3575
643	275.7	5.76628	2.02909	2.99667	5.44937	8.71833	10.3625
642	275.8	5.75991	2.02593	2.98947	5.43857	8.69571	10.3586
641	275.9	5.7547	2.02348	2.98476	5.42909	8.6925	10.3658
640	276	5.74639	2.02143	2.97733	5.415	8.68333	10.3658
639	276.1	5.73513	2.00808	2.965	5.39533	8.67333	10.36
638	276.2	5.72584	2.00536	2.954	5.37667	8.66625	10.365
637	276.3	5.71393	2.00294	2.94333	5.34889	8.65571	10.3606
636	276.4	5.70238	1.99786	2.925	5.34125	8.64143	10.3592
635	276.5	5.68836	1.99	2.914	5.31	8.61913	10.3525
634	276.6	5.67104	1.9825	2.9	5.29938	8.60857	10.3523
633	276.7	5.65548	1.97444	2.88389	5.26727	8.59667	10.3478
632	276.8	5.63505	1.96526	2.87	5.24636	8.56778	10.3414
631	276.9	5.61766	1.95867	2.85556	5.21857	8.53812	10.3325
630	277	5.59573	1.94667	2.84062	5.19	8.523	10.32
629	277.1	5.57482	1.93786	2.81833	5.16286	8.50667	10.3011
628	277.2	5.55033	1.92923	2.79263	5.12286	8.48	10.285
627	277.3	5.52607	1.905	2.7725	5.09	8.4625	10.2718
626	277.4	5.49892	1.89318	2.75115	5.05	8.43714	10.2567
625	277.5	5.47108	1.87853	2.72381	5.01704	8.412	10.23
624	277.6	5.4433	1.87258	2.70476	4.98437	8.38727	10.1967
623	277.7	5.41324	1.86308	2.67714	4.946	8.35778	10.1775
622	277.8	5.38255	1.85176	2.65067	4.90857	8.326	10.156
621	277.9	5.35094	1.83364	2.62217	4.86778	8.28714	10.119
620	278	5.31816	1.81765	2.59824	4.82583	8.26167	10.104
619	278.1	5.28481	1.80571	2.56737	4.78529	8.22222	10.068
618	278.2	5.24963	1.78647	2.5295	4.74471	8.18625	10.0307
617	278.3	5.21356	1.76818	2.50412	4.70556	8.139	9.99833
616	278.4	5.17493	1.7525	2.48214	4.66	8.10833	9.97111
615	278.5	5.13512	1.73133	2.45	4.61375	8.06833	9.925
614	278.6	5.09751	1.71231	2.42	4.55971	8.03167	9.894
613	278.7	5.05844	1.69556	2.3908	4.51839	7.98333	9.858
612	278.8	5.01612	1.67556	2.35667	4.48059	7.9275	9.81333
611	278.9	4.97534	1.64353	2.3275	4.4325	7.88286	9.77143
610	279	4.93229	1.62789	2.29256	4.38857	7.834	9.7325
609	279.1	4.8902	1.61875	2.25742	4.34296	7.78	9.688
608	279.2	4.84742	1.59905	2.23263	4.295	7.73286	9.645
607	279.3	4.80144	1.58	2.19333	4.23571	7.67571	9.595
606	279.4	4.75637	1.56056	2.16227	4.18111	7.63	9.53333
605	279.5	4.71435	1.54105	2.13174	4.14111	7.5725	9.48
604	279.6	4.66612	1.523	2.0996	4.09	7.50857	9.435
603	279.7	4.62153	1.504	2.06667	4.04	7.462	9.386
602	279.8	4.57447	1.48611	2.02868	3.99727	7.38588	9.31667
601	279.9	4.5293	1.46632	2.00419	3.95267	7.335	9.265
600	280	4.4814	1.44706	1.97941	3.89643	7.269	9.21
599	280.1	4.43544	1.42632	1.94625	3.84941	7.22	9.15833
598	280.2	4.3877	1.39933	1.909	3.79719	7.156	9.11
597	280.3	4.33993	1.38133	1.87756	3.74905	7.09167	9.038
596	280.4	4.29268	1.37094	1.855	3.7	7.0175	8.992
595	280.5	4.24484	1.35375	1.82846	3.65091	6.96222	8.935
594	280.6	4.19811	1.33467	1.79864	3.604	6.88882	8.861
593	280.7	4.15005	1.31235	1.7703	3.54808	6.82923	8.78667
592	280.8	4.10288	1.29292	1.74241	3.50167	6.76053	8.71857
591	280.9	4.05744	1.27458	1.712	3.45667	6.69867	8.65143
590	281	4.00975	1.25421	1.68154	3.40667	6.6275	8.582
589	281.1	3.96332	1.23333	1.64269	3.367	6.55667	8.51
588	281.2	3.91703	1.21333	1.62155	3.31414	6.508	8.45
587	281.3	3.87075	1.19333	1.59187	3.27087	6.43941	8.366
586	281.4	3.82439	1.17259	1.563	3.22571	6.37636	8.32
585	281.5	3.78085	1.14227	1.533	3.18583	6.30615	8.245
584	281.6	3.73585	1.1275	1.50148	3.14294	6.25	8.176
583	281.7	3.68933	1.11444	1.47469	3.09	6.18563	8.11182
582	281.8	3.64607	1.09571	1.44906	3.04393	6.124	8.03583
581	281.9	3.60388	1.0775	1.42633	3.005	6.05571	7.97333
580	282	3.55988	1.0584	1.39061	2.97	6.00091	7.912
579	282.1	3.51632	1.03963	1.3725	2.92545	5.93643	7.84571
578	282.2	3.47553	1.0235	1.35094	2.88579	5.87909	7.79
577	282.3	3.4339	1.00391	1.3252	2.84625	5.82385	7.73
576	282.4	3.39329	0.989048	1.30088	2.79968	5.76429	7.6625
575	282.5	3.35318	0.9705	1.27707	2.77161	5.70667	7.5875
574	282.6	3.3128	0.9468	1.25488	2.74045	5.6475	7.51875
573	282.7	3.27221	0.9345	1.23294	2.69857	5.59	7.46
572	282.8	3.23499	0.922059	1.21182	2.66176	5.53364	7.4
571	282.9	3.19518	0.906389	1.19054	2.63091	5.47444	7.32667
570	283	3.15797	0.888485	1.17026	2.59687	5.41917	7.26111
569	283.1	3.12182	0.875238	1.14121	2.56333	5.36778	7.20667
568	283.2	3.08548	0.859118	1.12631	2.52513	5.30647	7.13625
567	283.3	3.04986	0.842667	1.11559	2.49824	5.26087	7.086
566	283.4	3.01705	0.818889	1.09923	2.46864	5.21143	7.0175
565	283.5	2.98013	0.811977	1.08043	2.43722	5.152	6.95333
564	283.6	2.94787	0.801163	1.06364	2.40692	5.09824	6.90286
563	283.7	2.91364	0.787451	1.04486	2.37417	5.04889	6.8375
562	283.8	2.88249	0.774634	1.02949	2.34562	5.00429	6.769
561	283.9	2.85113	0.761087	1.01275	2.31696	4.95556	6.72571
560	284	2.82003	0.748571	0.997179	2.291	4.90857	6.67375
559	284.1	2.78903	0.737778	0.98	2.258	4.84944	6.62
558	284.2	2.75919	0.725	0.965111	2.23929	4.80875	6.55556
557	284.3	2.73033	0.714211	0.941667	2.21353	4.76421	6.495
556	284.4	2.70323	0.693692	0.93425	2.18864	4.72833	6.46
555	284.5	2.67423	0.68596	0.924571	2.16273	4.68667	6.40333
554	284.6	2.649	0.680284	0.910652	2.13912	4.64667	6.34583
553	284.7	2.62203	0.671647	0.899556	2.11741	4.59556	6.29375
552	284.8	2.59585	0.662021	0.887111	2.09419	4.55609	6.24667
551	284.9	2.57325	0.652333	0.876522	2.07391	4.51708	6.19571
550	285	2.54757	0.64172	0.864865	2.05125	4.48538	6.15
549	285.1	2.52561	0.632021	0.855	2.02744	4.449	6.09429
548	285.2	2.50152	0.624043	0.843243	2.00617	4.41692	6.05556
547	285.3	2.4803	0.616263	0.824878	1.99571	4.38182	6.01
546	285.4	2.45832	0.608511	0.81716	1.97652	4.34294	5.966
545	285.5	2.43787	0.601442	0.81274	1.95833	4.30667	5.92429
544	285.6	2.41912	0.593367	0.806452	1.9428	4.28625	5.88333
543	285.7	2.39946	0.586481	0.799211	1.92538	4.25556	5.84333
542	285.8	2.38089	0.57	0.790889	1.8987	4.22111	5.80571
541	285.9	2.36374	0.567255	0.78325	1.88417	4.2	5.766
540	286	2.34838	0.564833	0.776	1.8751	4.17455	5.746
539	286.1	2.33102	0.560474	0.768333	1.86655	4.14429	5.7
538	286.2	2.31496	0.556791	0.763171	1.85207	4.12235	5.67143
537	286.3	2.30115	0.551495	0.756061	1.83957	4.09625	5.642
536	286.4	2.28636	0.547047	0.751351	1.82762	4.07	5.612
535	286.5	2.2733	0.542957	0.746923	1.81688	4.04429	5.58
534	286.6	2.26134	0.538402	0.74	1.80706	4.01833	5.55375
533	286.7	2.24974	0.535352	0.736316	1.79538	4.00923	5.53714
532	286.8	2.23954	0.531615	0.732353	1.78545	3.997	5.51091
531	286.9	2.22906	0.52801	0.727778	1.77643	3.97111	5.49
530	287	2.2198	0.525029	0.723542	1.7675	3.95333	5.47
529	287.1	2.21121	0.522386	0.72	1.7584	3.941	5.45
528	287.2	2.20544	0.519271	0.716613	1.75083	3.932	5.44
527	287.3	2.19802	0.516411	0.713654	1.74552	3.92143	5.41714
526	287.4	2.19232	0.515105	0.711739	1.73923	3.91222	5.414
525	287.5	2.18681	0.513463	0.699333	1.73583	3.90625	5.396
524	287.6	2.18307	0.511736	0.697931	1.73143	3.90333	5.39143
523	287.7	2.18038	0.511429	0.697321	1.7295	3.893	5.385
522	287.8	2.17844	0.511429	0.697167	1.7281	3.8925	5.38
521	287.9	2.17751	0.510049	0.696316	1.72727	3.89333	5.37333
520	288	2.17728	0.511441	0.697308	1.72292	3.89375	5.38
519	288.1	2.17769	0.512366	0.697955	1.726	3.89636	5.3725
518	288.2	2.179	0.51198	0.698	1.7275	3.9	5.38
517	288.3	2.18204	0.514491	0.699583	1.7296	3.90545	5.388
516	288.4	2.18632	0.515411	0.711522	1.73393	3.91143	5.397
515	288.5	2.19116	0.517064	0.713617	1.73727	3.91667	5.406
514	288.6	2.19753	0.51875	0.715686	1.7404	3.92857	5.41714
513	288.7	2.20465	0.522518	0.718393	1.74786	3.93571	5.43333
512	288.8	2.21293	0.525597	0.723095	1.75545	3.95333	5.44875
511	288.9	2.22153	0.527766	0.726923	1.76321	3.966	5.46625
510	289	2.23367	0.531984	0.731739	1.77345	3.98818	5.48875
509	289.1	2.24423	0.536552	0.736863	1.78292	4.00375	5.50857
508	289.2	2.25815	0.542054	0.743846	1.79571	4.01789	5.53636
507	289.3	2.27226	0.546058	0.7492	1.8075	4.04778	5.55929
506	289.4	2.28782	0.551495	0.755854	1.82	4.07143	5.59667
505	289.5	2.30399	0.557752	0.763333	1.83654	4.09667	5.64154
504	289.6	2.3219	0.562606	0.769792	1.8512	4.128	5.68375
503	289.7	2.34247	0.566376	0.779111	1.87019	4.162	5.726
502	289.8	2.36374	0.569957	0.788537	1.87904	4.19929	5.765
501	289.9	2.3863	0.588409	0.799032	1.89767	4.24	5.80889
500	290	2.41045	0.597209	0.810211	1.9288	4.26895	5.8725
499	290.1	2.43617	0.606456	0.814865	1.95192	4.32143	5.92
498	290.2	2.46311	0.616716	0.822174	1.97516	4.36571	5.974
497	290.3	2.49089	0.626491	0.843962	1.99962	4.41182	6.038
496	290.4	2.52363	0.639636	0.86	2.02349	4.46571	6.09643
495	290.5	2.5559	0.651	0.873636	2.05625	4.51571	6.17444
494	290.6	2.58833	0.662	0.888214	2.0855	4.58	6.24429
493	290.7	2.62119	0.674182	0.905333	2.11391	4.63417	6.30545
492	290.8	2.66014	0.684272	0.923235	2.15087	4.69667	6.38583
491	290.9	2.69896	0.691698	0.9365	2.18211	4.75833	6.47
490	291	2.73904	0.7164	0.961667	2.21897	4.82154	6.55
489	291.1	2.78077	0.731698	0.980889	2.25429	4.88824	6.63167
488	291.2	2.82616	0.748571	1.00149	2.29342	4.966	6.7225
487	291.3	2.87359	0.765833	1.02489	2.34118	5.04333	6.80875
486	291.4	2.92142	0.78225	1.0464	2.38833	5.11667	6.915
485	291.5	2.97018	0.802821	1.07194	2.43385	5.19533	7
484	291.6	3.02187	0.816267	1.09689	2.48353	5.28357	7.09563
483	291.7	3.07651	0.829756	1.12256	2.52641	5.36875	7.207
482	291.8	3.13282	0.860968	1.14405	2.5852	5.459	7.30722
481	291.9	3.19226	0.885172	1.18486	2.63828	5.55333	7.422
480	292	3.25027	0.906667	1.21258	2.69238	5.65	7.535
479	292.1	3.31379	0.930147	1.24615	2.74632	5.74857	7.65571
478	292.2	3.37532	0.943103	1.2775	2.79514	5.84385	7.76333
477	292.3	3.44273	0.976429	1.31607	2.8681	5.95429	7.88583
476	292.4	3.51027	1.00143	1.35559	2.92857	6.05615	8.01429
475	292.5	3.57962	1.02786	1.3875	2.99727	6.16	8.135
474	292.6	3.6511	1.05313	1.43465	3.05	6.26667	8.27
473	292.7	3.72543	1.082	1.4773	3.13056	6.38214	8.4
472	292.8	3.80129	1.11094	1.51917	3.19783	6.504	8.516
471	292.9	3.87699	1.12851	1.56533	3.25896	6.615	8.64667
470	293	3.95901	1.16654	1.61217	3.34857	6.74	8.78
469	293.1	4.03789	1.19611	1.6488	3.4275	6.86	8.92
468	293.2	4.1205	1.22833	1.70556	3.50379	6.975	9.03875
467	293.3	4.20575	1.26045	1.75423	3.589	7.09538	9.19
466	293.4	4.29252	1.29571	1.80296	3.6775	7.22	9.322
465	293.5	4.37668	1.32909	1.855	3.75412	7.34	9.44556
464	293.6	4.4686	1.36318	1.89437	3.84789	7.46769	9.585
463	293.7	4.55652	1.38667	1.95524	3.936	7.59529	9.69692
462	293.8	4.64882	1.4319	2.005	4.01767	7.73	9.848
461	293.9	4.73891	1.46667	2.06238	4.11333	7.84778	9.98333
460	294	4.83175	1.50526	2.11882	4.2075	7.982	10.1136
459	294.1	4.9235	1.54481	2.17526	4.29476	8.098	10.2517
458	294.2	5.01919	1.5825	2.22882	4.39182	8.2325	10.385
457	294.3	5.11654	1.61813	2.27687	4.49462	8.36231	10.518
456	294.4	5.2113	1.64526	2.33867	4.59579	8.49	10.64
455	294.5	5.30715	1.69312	2.39286	4.70909	8.6165	10.7617
454	294.6	5.40042	1.72765	2.44762	4.80115	8.74083	10.88
453	294.7	5.49515	1.76462	2.50217	4.91667	8.85375	10.998
452	294.8	5.58916	1.80111	2.55	5.01829	8.965	11.1136
451	294.9	5.68539	1.84	2.62	5.14455	9.075	11.216
450	295	5.7769	1.87308	2.676	5.25071	9.19182	11.326
449	295.1	5.87147	1.905	2.74	5.34969	9.304	11.44
448	295.2	5.96041	1.95071	2.77969	5.48733	9.4	11.536
447	295.3	6.05173	1.984	2.84923	5.595	9.49833	11.6173
446	295.4	6.14013	2.02087	2.90769	5.70467	9.608	11.7167
445	295.5	6.22879	2.061	2.95706	5.81	9.71	11.8125
444	295.6	6.31507	2.09538	3.00581	5.93143	9.825	11.9025
443	295.7	6.39529	2.12875	3.05	6.01941	9.92143	11.998
442	295.8	6.47783	2.16308	3.10947	6.131	10.0178	12.07
441	295.9	6.55838	2.19556	3.165	6.25417	10.1017	12.152
440	296	6.63707	2.225	3.221	6.34905	10.185	12.218
439	296.1	6.71044	2.24933	3.25955	6.45643	10.2745	12.2757
438	296.2	6.78519	2.27333	3.29842	6.5537	10.3522	12.335
437	296.3	6.85291	2.29522	3.35429	6.64	10.4171	12.395
436	296.4	6.91967	2.3275	3.39556	6.74636	10.495	12.4436
435	296.5	6.98156	2.35625	3.44154	6.81	10.561	12.4967
434	296.6	7.04192	2.37875	3.47909	6.88842	10.6171	12.5317
433	296.7	7.09567	2.405	3.50957	6.96273	10.6873	12.58
432	296.8	7.15311	2.42667	3.54565	7.03889	10.7518	12.6145
431	296.9	7.20292	2.44375	3.58667	7.098	10.817	12.6463
430	297	7.25016	2.464	3.61615	7.17778	10.8647	12.68
429	297.1	7.29407	2.48333	3.64455	7.24	10.9222	12.6988
428	297.2	7.33315	2.498	3.66308	7.287	10.9712	12.7357
427	297.3	7.36951	2.50688	3.68333	7.34059	11.0175	12.76
426	297.4	7.40018	2.52062	3.6895	7.38063	11.0538	12.7762
425	297.5	7.43121	2.52687	3.71143	7.418	11.1011	12.788
424	297.6	7.45567	2.54067	3.71857	7.455	11.1333	12.8167
423	297.7	7.47803	2.54538	3.7315	7.49429	11.1744	12.834
422	297.8	7.49433	2.54588	3.74182	7.51095	11.1775	12.8467
421	297.9	7.50837	2.55	3.74462	7.53429	11.1964	12.8586
420	298	7.52144	2.55	3.75217	7.55143	11.2275	12.88
419	298.1	7.52677	2.548	3.7512	7.5581	11.2278	12.8825
418	298.2	7.53154	2.54824	3.75391	7.56	11.235	12.888
417	298.3	7.53423	2.54538	3.74909	7.57667	11.24	12.89
416	298.4	7.53172	2.54438	3.74	7.57385	11.2375	12.8867
415	298.5	7.52852	2.54312	3.73538	7.578	11.2375	12.887
414	298.6	7.51921	2.52905	3.73231	7.55667	11.2175	12.885
413	298.7	7.50847	2.52625	3.72063	7.54333	11.1993	12.886
412	298.8	7.4911	2.52111	3.70333	7.51294	11.1792	12.8687
411	298.9	7.4759	2.50937	3.68727	7.49625	11.1633	12.8657
410	299	7.45376	2.50692	3.665	7.465	11.13	12.8571
409	299.1	7.43507	2.50091	3.64692	7.42818	11.1125	12.8517
408	299.2	7.4078	2.48778	3.62667	7.39	11.08	12.8425
407	299.3	7.38134	2.4725	3.6	7.36125	11.06	12.834
406	299.4	7.35348	2.45667	3.58308	7.32267	11.0271	12.83
405	299.5	7.32204	2.43875	3.56038	7.26905	10.9944	12.8071
404	299.6	7.29018	2.42167	3.52667	7.22667	10.9622	12.7833
403	299.7	7.25367	2.41308	3.5025	7.17455	10.9183	12.7725
402	299.8	7.22081	2.40125	3.48188	7.13042	10.8825	12.7425
401	299.9	7.18229	2.3825	3.44667	7.08111	10.84	12.725
400	300	7.13947	2.36455	3.41429	7.02	10.8045	12.6927
399	300.1	7.10124	2.34167	3.38091	6.9675	10.7786	12.675
398	300.2	7.06159	2.31556	3.34909	6.92429	10.7371	12.6344
397	300.3	7.02019	2.29235	3.31476	6.86769	10.6942	12.6
396	300.4	6.97873	2.26	3.27937	6.80091	10.6557	12.574
395	300.5	6.93438	2.2525	3.25143	6.74071	10.6119	12.5291
394	300.6	6.88926	2.23455	3.2225	6.66625	10.5682	12.51
393	300.7	6.84139	2.2075	3.185	6.592	10.53	12.4714
392	300.8	6.79552	2.19167	3.15143	6.53273	10.485	12.4171
391	300.9	6.75455	2.17	3.121	6.47636	10.4425	12.3833
390	301	6.70669	2.14667	3.08846	6.405	10.3956	12.34
389	301.1	6.66238	2.125	3.0492	6.34118	10.358	12.302
388	301.2	6.61511	2.10909	3.02773	6.266	10.314	12.252
387	301.3	6.56968	2.09222	3.00286	6.207	10.2729	12.195
386	301.4	6.52579	2.06929	2.976	6.152	10.2267	12.1525
385	301.5	6.48168	2.04929	2.95	6.09429	10.18	12.105
384	301.6	6.43868	2.02391	2.92429	6.04571	10.1475	12.06
383	301.7	6.39632	2.00524	2.8975	5.98111	10.1113	12.0233
382	301.8	6.3482	1.9925	2.86636	5.91286	10.0583	11.964
381	301.9	6.30682	1.97545	2.844	5.84882	10.0143	11.9171
380	302	6.26699	1.95636	2.8175	5.80385	9.96667	11.864
379	302.1	6.22699	1.94222	2.79	5.75083	9.93	11.8233
378	302.2	6.18733	1.91	2.75471	5.69143	9.88333	11.775
377	302.3	6.14542	1.89	2.73625	5.6325	9.84182	11.73
376	302.4	6.11024	1.88	2.71571	5.58182	9.80167	11.685
375	302.5	6.07269	1.87	2.69167	5.536	9.76	11.6375
374	302.6	6.03567	1.86091	2.67	5.48667	9.72333	11.6
373	302.7	5.99965	1.846	2.64625	5.43917	9.68833	11.5643
372	302.8	5.96683	1.83176	2.62833	5.404	9.646	11.5186
371	302.9	5.93221	1.82231	2.60111	5.37227	9.61	11.484
370	303	5.90117	1.805	2.57923	5.33286	9.57	11.4486
369	303.1	5.8712	1.79889	2.56071	5.295	9.533	11.415
368	303.2	5.83911	1.7825	2.54033	5.26071	9.49857	11.366
367	303.3	5.81192	1.77083	2.52242	5.23111	9.4675	11.3363
366	303.4	5.78244	1.76091	2.50414	5.18909	9.4275	11.2857
365	303.5	5.75639	1.74909	2.49143	5.16	9.4	11.266
364	303.6	5.73295	1.74	2.47333	5.13286	9.36733	11.23
363	303.7	5.70738	1.72889	2.4625	5.09833	9.34182	11.1947
362	303.8	5.68396	1.71737	2.44647	5.083	9.31091	11.1667
361	303.9	5.66143	1.70591	2.43214	5.05353	9.284	11.1429
360	304	5.64224	1.70071	2.42615	5.043	9.26429	11.114
359	304.1	5.62115	1.68833	2.41143	5.01437	9.23857	11.0983
358	304.2	5.60635	1.68333	2.40176	4.99714	9.2275	11.078
357	304.3	5.58672	1.67529	2.39364	4.978	9.19647	11.0567
356	304.4	5.57008	1.65733	2.37889	4.95846	9.17417	11.032
355	304.5	5.55589	1.64737	2.37	4.948	9.16	11.0225
354	304.6	5.54176	1.63913	2.35857	4.92875	9.14714	11
353	304.7	5.52782	1.63435	2.35235	4.91846	9.11867	10.9975
352	304.8	5.51484	1.63	2.345	4.90733	9.11091	10.99
351	304.9	5.50559	1.62919	2.33556	4.89714	9.11	10.9833
350	305	5.49228	1.624	2.32615	4.88571	9.08875	10.9667
349	305.1	5.48584	1.62293	2.32118	4.883	9.082	10.9629
348	305.2	5.47385	1.62184	2.31455	4.86818	9.06857	10.9467
347	305.3	5.46895	1.61905	2.29862	4.86615	9.06333	10.94
346	305.4	5.46191	1.615	2.29654	4.84773	9.056	10.94
345	305.5	5.45658	1.61095	2.2948	4.86045	9.03765	10.925
344	305.6	5.45066	1.60905	2.292	4.84696	9.035	10.9163
343	305.7	5.44529	1.60474	2.29222	4.84714	9.025	10.9086
342	305.8	5.44272	1.60526	2.27929	4.84412	9.02538	10.9033
341	305.9	5.43776	1.60059	2.27786	4.84217	9.01444	10.8917
340	306	5.43836	1.60136	2.27581	4.84345	9.01429	10.8938
339	306.1	5.43627	1.59471	2.2744	4.84056	9.015	10.8917
338	306.2	5.43517	1.592	2.27233	4.84333	9.01667	10.8817
337	306.3	5.43483	1.58789	2.27143	4.84348	9.018	10.8673
336	306.4	5.43272	1.58611	2.27038	4.84368	9.02222	10.88
335	306.5	5.43272	1.58563	2.2595	4.84733	9.01	10.868
334	306.6	5.43667	1.58375	2.25765	4.84895	9.015	10.8844
333	306.7	5.43652	1.58353	2.25625	4.84792	9.02714	10.89
332	306.8	5.44007	1.58333	2.25571	4.86455	9.02556	10.89
331	306.9	5.44261	1.58056	2.25476	4.86778	9.0336	10.895
330	307	5.44598	1.582	2.255	4.87167	9.03389	10.9025
329	307.1	5.44844	1.58053	2.25208	4.87222	9.03529	10.9057
328	307.2	5.45322	1.58059	2.25222	4.87833	9.0372	10.9075
327	307.3	5.45729	1.57857	2.25167	4.88231	9.06111	10.9114
326	307.4	5.46333	1.58125	2.25333	4.89	9.071	10.92
325	307.5	5.46746	1.58143	2.25368	4.89	9.073	10.9267
324	307.6	5.46809	1.58	2.2545	4.89154	9.0725	10.93
323	307.7	5.47643	1.578	2.25524	4.9	9.08556	10.938
322	307.8	5.481	1.58214	2.2575	4.90286	9.08545	10.9443
321	307.9	5.48721	1.58286	2.25875	4.90769	9.09429	10.9464
320	308	5.49223	1.58083	2.25864	4.91444	9.106	10.9683
319	308.1	5.49978	1.58333	2.27143	4.925	9.11412	10.9683
318	308.2	5.50532	1.58462	2.27304	4.92909	9.11706	10.98
317	308.3	5.51133	1.58	2.27429	4.94	9.1325	10.9925
316	308.4	5.5184	1.58167	2.27708	4.94385	9.1425	11.005
315	308.5	5.52224	1.58	2.27739	4.94538	9.15	11.0167
314	308.6	5.53029	1.57933	2.27862	4.95923	9.16875	11.0329
313	308.7	5.53451	1.581	2.29103	4.95812	9.164	11.0337
312	308.8	5.54398	1.584	2.29286	4.96923	9.17789	11.0533
311	308.9	5.54862	1.584	2.29516	4.97571	9.185	11.06
310	309	5.55717	1.588	2.29774	4.98	9.19438	11.08
309	309.1	5.56357	1.589	2.299	4.986	9.19643	11.0775
308	309.2	5.56847	1.58857	2.3155	4.98	9.22	11.1
307	309.3	5.57669	1.59048	2.31889	4.98455	9.22833	11.1113
306	309.4	5.5842	1.59	2.32333	4.99462	9.23833	11.115
305	309.5	5.58978	1.592	2.32933	4.99647	9.25	11.1178
304	309.6	5.59681	1.59333	2.335	5.00182	9.263	11.142
303	309.7	5.60266	1.5925	2.34333	5.005	9.26429	11.1517
302	309.8	5.60831	1.597	2.35133	5.01125	9.27	11.1567
301	309.9	5.61487	1.59545	2.35429	5.01615	9.28	11.1725
300	310	5.62281	1.6	2.3625	5.01583	9.28714	11.175
299	310.1	5.62779	1.59727	2.36909	5.0175	9.288	11.18
298	310.2	5.63499	1.59786	2.37714	5.03417	9.306	11.185
297	310.3	5.64138	1.59438	2.38187	5.037	9.31333	11.1914
296	310.4	5.64679	1.594	2.38692	5.04222	9.328	11.1936
295	310.5	5.65403	1.59286	2.39333	5.04	9.33571	11.2
294	310.6	5.65941	1.59263	2.39846	5.04286	9.335	11.2214
293	310.7	5.66445	1.58786	2.405	5.04545	9.344	11.232
292	310.8	5.67093	1.587	2.41353	5.04833	9.35167	11.238
291	310.9	5.67607	1.584	2.41583	5.05381	9.36083	11.238
290	311	5.68265	1.57941	2.42167	5.05773	9.36909	11.2386
289	311.1	5.68977	1.57375	2.42667	5.07077	9.38857	11.255
288	311.2	5.69394	1.57071	2.436	5.0592	9.39	11.2733
287	311.3	5.6988	1.57111	2.43909	5.07091	9.38375	11.28
286	311.4	5.70291	1.57	2.44455	5.072	9.3875	11.285
285	311.5	5.70935	1.5625	2.45231	5.085	9.39833	11.2857
284	311.6	5.71219	1.55833	2.45786	5.086	9.3975	11.286
283	311.7	5.72086	1.55333	2.463	5.09318	9.40833	11.3017
282	311.8	5.726	1.55364	2.474	5.09538	9.41111	11.3033
281	311.9	5.73008	1.555	2.477	5.0965	9.41	11.31
280	312	5.7344	1.54875	2.47615	5.09722	9.42429	11.32
279	312.1	5.7383	1.5435	2.482	5.09828	9.43	11.3229
278	312.2	5.74449	1.535	2.48583	5.115	9.43286	11.3375
277	312.3	5.74668	1.53444	2.49176	5.1175	9.4225	11.3386
276	312.4	5.75317	1.52778	2.49412	5.124	9.43125	11.354
275	312.5	5.75788	1.52538	2.50043	5.11667	9.442	11.36
274	312.6	5.76206	1.5175	2.5032	5.1225	9.44522	11.36
273	312.7	5.7684	1.518	2.50682	5.129	9.464	11.3637
272	312.8	5.76837	1.515	2.50813	5.13231	9.46545	11.364
271	312.9	5.77248	1.508	2.50952	5.13625	9.47111	11.3667
270	313	5.77885	1.505	2.525	5.1475	9.48	11.3933
269	313.1	5.78183	1.50667	2.53	5.15273	9.47714	11.4
268	313.2	5.78563	1.505	2.54056	5.15231	9.474	11.408
267	313.3	5.79081	1.502	2.54292	5.15533	9.481	11.4233
266	313.4	5.79429	1.4975	2.54682	5.16263	9.47875	11.425
265	313.5	5.80013	1.498	2.5625	5.164	9.48545	11.4275
264	313.6	5.80233	1.492	2.56273	5.15941	9.49	11.4433
263	313.7	5.80635	1.48909	2.56545	5.1625	9.49625	11.4457
262	313.8	5.81191	1.48385	2.56833	5.1675	9.50429	11.449
261	313.9	5.81528	1.48455	2.57091	5.175	9.50714	11.4725
260	314	5.81851	1.48286	2.57308	5.17364	9.50875	11.47
259	314.1	5.82201	1.479	2.57	5.175	9.5225	11.48
258	314.2	5.82729	1.47333	2.56929	5.18231	9.53217	11.485
257	314.3	5.83219	1.471	2.575	5.18625	9.53235	11.5025
256	314.4	5.83628	1.47111	2.582	5.18579	9.53313	11.5075
255	314.5	5.83919	1.46889	2.5825	5.19364	9.5375	11.5175
254	314.6	5.84194	1.47	2.58267	5.19556	9.53824	11.5183
253	314.7	5.84879	1.467	2.58308	5.20545	9.5395	11.535
252	314.8	5.84943	1.46714	2.584	5.20556	9.5387	11.5375
251	314.9	5.85477	1.46818	2.58385	5.20917	9.55583	11.57
250	315	5.85811	1.46429	2.5875	5.219	9.558	11.5667
249	315.1	5.86186	1.46556	2.58455	5.21294	9.56333	11.5833
248	315.2	5.86784	1.46462	2.585	5.2225	9.57125	11.5933
247	315.3	5.87134	1.46583	2.582	5.225	9.57571	11.6025
246	315.4	5.87706	1.46643	2.58875	5.23308	9.585	11.614
245	315.5	5.88128	1.46333	2.585	5.23417	9.6	11.6189
244	315.6	5.88724	1.4625	2.58667	5.24462	9.60778	11.63
243	315.7	5.88966	1.46111	2.57933	5.24591	9.61786	11.6475
242	315.8	5.89443	1.46143	2.58294	5.25273	9.63286	11.65
241	315.9	5.90105	1.46167	2.58231	5.25833	9.63875	11.682
240	316	5.90458	1.46545	2.58429	5.2608	9.6475	11.68
239	316.1	5.91049	1.465	2.57867	5.26143	9.66286	11.71
238	316.2	5.91566	1.46636	2.581	5.26636	9.65769	11.7267
237	316.3	5.92382	1.46545	2.57941	5.26818	9.675	11.7533
236	316.4	5.92598	1.467	2.57895	5.28083	9.68429	11.76
235	316.5	5.93265	1.47	2.58077	5.28571	9.69231	11.7783
234	316.6	5.94132	1.47167	2.58182	5.29091	9.71429	11.8125
233	316.7	5.94684	1.47167	2.58111	5.30083	9.7275	11.8367
232	316.8	5.9502	1.474	2.58421	5.3	9.73167	11.845
231	316.9	5.95903	1.47545	2.58444	5.30474	9.7425	11.8629
230	317	5.96567	1.48	2.59	5.30375	9.755	11.8838
229	317.1	5.9727	1.47636	2.586	5.30944	9.76667	11.905
228	317.2	5.98156	1.48	2.58571	5.30913	9.77889	11.924
227	317.3	5.9898	1.48111	2.586	5.32636	9.78556	11.9417
226	317.4	5.99621	1.485	2.59167	5.33364	9.78769	11.966
225	317.5	6.00419	1.48286	2.58875	5.335	9.80667	11.99
224	317.6	6.01577	1.48444	2.5875	5.34105	9.82	12.0255
223	317.7	6.02455	1.48143	2.58714	5.34684	9.8475	12.0367
222	317.8	6.03352	1.47923	2.595	5.36154	9.86455	12.066
221	317.9	6.04208	1.48667	2.6	5.36923	9.885	12.0917
220	318	6.05238	1.49	2.60167	5.38125	9.8975	12.115
219	318.1	6.06276	1.48091	2.60417	5.39364	9.90286	12.145
218	318.2	6.07453	1.484	2.61143	5.39778	9.93286	12.185
217	318.3	6.08318	1.4825	2.60889	5.412	9.94154	12.1983
216	318.4	6.09932	1.48	2.61417	5.43312	9.96875	12.242
215	318.5	6.10921	1.48125	2.615	5.44444	9.99167	12.2533
214	318.6	6.1237	1.48462	2.61875	5.46182	10.0125	12.2633
213	318.7	6.13321	1.481	2.61875	5.47846	10.0275	12.282
212	318.8	6.15206	1.48636	2.62833	5.499	10.0382	12.3217
211	318.9	6.16322	1.48429	2.628	5.5108	10.0725	12.3517
210	319	6.17831	1.49	2.63833	5.51929	10.0967	12.3683
209	319.1	6.19329	1.48667	2.64286	5.54714	10.1136	12.4075
208	319.2	6.2094	1.49	2.64667	5.55857	10.14	12.442
207	319.3	6.2251	1.49143	2.655	5.584	10.17	12.47
206	319.4	6.24203	1.49333	2.66417	5.59792	10.1906	12.52
205	319.5	6.26147	1.50083	2.67286	5.62636	10.2245	12.5725
204	319.6	6.27888	1.50273	2.67375	5.645	10.2536	12.5875
203	319.7	6.29757	1.50636	2.6775	5.67077	10.2808	12.635
202	319.8	6.31947	1.5125	2.682	5.68667	10.315	12.685
201	319.9	6.33945	1.51286	2.695	5.70818	10.35	12.71
200	320	6.36115	1.525	2.70455	5.726	10.3691	12.76
199	320.1	6.3811	1.526	2.708	5.74917	10.4129	12.7871
198	320.2	6.40354	1.535	2.73	5.78091	10.442	12.8417
197	320.3	6.42679	1.53917	2.74	5.80438	10.49	12.8686
196	320.4	6.44931	1.54667	2.75125	5.82889	10.5229	12.93
195	320.5	6.47662	1.55571	2.75692	5.86667	10.5622	12.9767
194	320.6	6.49914	1.56688	2.77167	5.882	10.5956	13.02
193	320.7	6.52731	1.57545	2.775	5.91167	10.6171	13.0633
192	320.8	6.55448	1.58778	2.794	5.93533	10.6671	13.105
191	320.9	6.58339	1.597	2.81222	5.96467	10.6973	13.1467
190	321	6.61234	1.60667	2.8275	6.005	10.7392	13.19
189	321.1	6.64147	1.61455	2.845	6.035	10.7827	13.2171
188	321.2	6.67149	1.62333	2.86364	6.05625	10.8233	13.2825
187	321.3	6.70028	1.62611	2.87364	6.09407	10.8625	13.335
186	321.4	6.73785	1.635	2.89294	6.13348	10.9267	13.41
185	321.5	6.77041	1.64667	2.9075	6.176	10.9678	13.46
184	321.6	6.80054	1.6575	2.92563	6.21	11.0033	13.52
183	321.7	6.83665	1.67909	2.94333	6.252	11.0544	13.57
182	321.8	6.87199	1.69429	2.96455	6.29071	11.1017	13.6525
181	321.9	6.9093	1.69917	2.984	6.32923	11.1533	13.73
180	322	6.94711	1.7125	3	6.36583	11.1988	13.7875
179	322.1	6.98396	1.724	3.0205	6.38806	11.2538	13.845
178	322.2	7.02495	1.73667	3.02895	6.43692	11.32	13.905
177	322.3	7.06592	1.747	3.04909	6.48059	11.3644	13.96
176	322.4	7.10744	1.76231	3.06762	6.51542	11.4322	14.024
175	322.5	7.15123	1.77364	3.09667	6.56	11.4887	14.092
174	322.6	7.1913	1.78909	3.12	6.59792	11.5353	14.16
173	322.7	7.23657	1.805	3.14778	6.655	11.5983	14.218
172	322.8	7.28105	1.815	3.169	6.69857	11.665	14.2871
171	322.9	7.32842	1.83125	3.19333	6.74	11.74	14.39
170	323	7.37781	1.844	3.21125	6.8	11.8	14.46
169	323.1	7.42249	1.86125	3.24	6.84267	11.8609	14.5175
168	323.2	7.47375	1.8755	3.25792	6.9075	11.9383	14.58
167	323.3	7.52407	1.89091	3.28	6.9625	12.015	14.64
166	323.4	7.57395	1.905	3.31292	7.014	12.088	14.7267
165	323.5	7.62971	1.93455	3.33917	7.08333	12.1643	14.7867
164	323.6	7.67994	1.949	3.366	7.13294	12.229	14.855
163	323.7	7.73291	1.97333	3.39667	7.188	12.31	14.935
162	323.8	7.78805	1.992	3.42143	7.24636	12.3677	14.9825
161	323.9	7.84194	2.00714	3.45	7.29875	12.4462	15.035
160	324	7.8994	2.02471	3.47571	7.364	12.5221	15.145
159	324.1	7.95594	2.05167	3.50875	7.435	12.6067	15.22
158	324.2	8.0168	2.07143	3.54286	7.51143	12.69	15.285
157	324.3	8.07681	2.1	3.56786	7.59	12.7629	15.3486
156	324.4	8.13468	2.124	3.608	7.64	12.85	15.44
155	324.5	8.1928	2.15	3.63	7.718	12.94	15.5033
154	324.6	8.25674	2.17667	3.665	7.79643	13.021	15.5767
153	324.7	8.31978	2.19833	3.70833	7.86471	13.11	15.64
152	324.8	8.38195	2.23	3.73875	7.9265	13.1875	15.72
151	324.9	8.44503	2.2525	3.77467	8.01556	13.254	15.7786
150	325	8.51317	2.27778	3.81154	8.092	13.33	15.8688
149	325.1	8.57485	2.314	3.85111	8.1675	13.4043	15.9475
148	325.2	8.64258	2.35	3.87833	8.246	13.4933	16.0333
147	325.3	8.70598	2.38	3.91	8.31875	13.5786	16.11
146	325.4	8.77612	2.40545	3.94333	8.4	13.674	16.192
145	325.5	8.84201	2.43571	3.97	8.47692	13.7708	16.266
144	325.6	8.91488	2.46889	4.01444	8.56667	13.855	16.3433
143	325.7	8.97919	2.50353	4.05571	8.63875	13.928	16.42
142	325.8	9.04659	2.52846	4.105	8.72571	13.9989	16.505
141	325.9	9.11557	2.5675	4.15429	8.78929	14.0767	16.5789
140	326	9.18574	2.5975	4.19143	8.86929	14.1667	16.6775
139	326.1	9.25859	2.625	4.224	8.96778	14.27	16.77
138	326.2	9.33047	2.66	4.25923	9.05833	14.3636	16.86
137	326.3	9.40164	2.70625	4.29667	9.13375	14.4675	16.94
136	326.4	9.47039	2.73714	4.33857	9.21667	14.5583	17.0225
135	326.5	9.54454	2.76	4.37882	9.31444	14.6625	17.118
134	326.6	9.61309	2.792	4.41667	9.39545	14.7511	17.1967
133	326.7	9.68769	2.83222	4.459	9.48	14.8257	17.28
132	326.8	9.75983	2.8675	4.495	9.56375	14.9122	17.35
131	326.9	9.82858	2.91286	4.55111	9.635	15.0075	17.4367
130	327	9.90563	2.945	4.59222	9.7375	15.1119	17.512
129	327.1	9.97612	2.97625	4.64	9.815	15.1867	17.575
128	327.2	10.0491	3.00714	4.695	9.88556	15.276	17.66
127	327.3	10.1196	3.04294	4.735	9.97833	15.3675	17.735
126	327.4	10.1958	3.08444	4.76833	10.0813	15.4625	17.8033
125	327.5	10.2646	3.11182	4.82167	10.1643	15.53	17.875
124	327.6	10.3347	3.145	4.8675	10.2425	15.6186	17.94
123	327.7	10.4084	3.17364	4.9125	10.3478	15.73	18.034
122	327.8	10.4803	3.21333	4.95	10.4333	15.845	18.108
121	327.9	10.5515	3.24714	4.98714	10.515	15.9383	18.17
120	328	10.6215	3.27417	5.04333	10.604	16.015	18.2325
119	328.1	10.6893	3.31167	5.09125	10.6888	16.0791	18.3211
118	328.2	10.7586	3.348	5.13	10.7809	16.175	18.39
117	328.3	10.8285	3.39167	5.178	10.87	16.2633	18.452
116	328.4	10.8989	3.43111	5.23714	10.98	16.3475	18.5183
115	328.5	10.9677	3.45875	5.27	11.0786	16.43	18.59
114	328.6	11.0365	3.495	5.32833	11.1575	16.502	18.672
113	328.7	11.1033	3.525	5.36429	11.26	16.579	18.7329
112	328.8	11.1697	3.54667	5.41455	11.3433	16.6783	18.8067
111	328.9	11.2355	3.5925	5.46571	11.43	16.762	18.8911
110	329	11.3032	3.625	5.49571	11.5215	16.8544	18.97
109	329.1	11.3717	3.65857	5.54	11.601	16.965	19.06
108	329.2	11.4327	3.706	5.59	11.68	17.0343	19.104
107	329.3	11.5004	3.742	5.64	11.7483	17.13	19.19
106	329.4	11.5595	3.77167	5.6825	11.8367	17.2057	19.2533
105	329.5	11.6237	3.8	5.736	11.9212	17.2889	19.321
104	329.6	11.6851	3.84	5.76833	12.01	17.3789	19.3775
103	329.7	11.7509	3.87	5.805	12.0943	17.4767	19.445
102	329.8	11.8058	3.89875	5.86429	12.1636	17.5357	19.5017
101	329.9	11.8682	3.93625	5.91	12.2443	17.63	19.5713
100	330	11.9287	3.9825	5.95429	12.3186	17.7067	19.625
99	330.1	11.9847	4.013	5.99143	12.3679	17.7786	19.6913
98	330.2	12.0428	4.03571	6.04	12.43	17.858	19.75
97	330.3	12.1018	4.05667	6.08333	12.4989	17.9567	19.7967
96	330.4	12.1517	4.096	6.11571	12.5544	18.0229	19.84
95	330.5	12.2084	4.135	6.1625	12.6318	18.104	19.8857
94	330.6	12.263	4.162	6.21	12.67	18.1743	19.9388
93	330.7	12.3143	4.186	6.24667	12.7287	18.2346	19.9869
92	330.8	12.3649	4.216	6.29333	12.7762	18.3236	20.055
91	330.9	12.4189	4.245	6.325	12.8367	18.389	20.1317
90	331	12.4707	4.26833	6.35	12.89	18.4727	20.1729
89	331.1	12.5239	4.3025	6.38667	12.9433	18.5489	20.235
88	331.2	12.5655	4.338	6.42778	12.9833	18.6	20.28
87	331.3	12.6171	4.375	6.468	13.032	18.6746	20.328
86	331.4	12.6624	4.40667	6.51538	13.085	18.7342	20.372
85	331.5	12.7051	4.44	6.55667	13.0983	18.8114	20.438
84	331.6	12.7572	4.46333	6.5975	13.1457	18.88	20.487
83	331.7	12.7951	4.486	6.63545	13.1682	18.9114	20.5413
82	331.8	12.8425	4.535	6.67	13.1936	18.9865	20.6217
81	331.9	12.8831	4.55333	6.695	13.2314	19.0538	20.6775
80	332	12.9252	4.585	6.744	13.2667	19.11	20.73
79	332.1	12.9661	4.6	6.78125	13.2792	19.1633	20.8011
78	332.2	13.0099	4.63333	6.81	13.3367	19.2357	20.866
77	332.3	13.0461	4.66	6.84611	13.382	19.2856	20.8982
76	332.4	13.0819	4.68667	6.88778	13.4025	19.3228	20.9233
75	332.5	13.1212	4.704	6.92	13.4212	19.3657	20.9843
74	332.6	13.156	4.73333	6.952	13.4611	19.3958	21.0263
73	332.7	13.1845	4.76143	6.9725	13.48	19.434	21.0444
72	332.8	13.2189	4.795	7	13.5	19.4813	21.0967
71	332.9	13.2542	4.80692	7.02	13.5209	19.5269	21.13
70	333	13.2828	4.83667	7.055	13.5247	19.5586	21.1667
69	333.1	13.3117	4.86143	7.084	13.53	19.6063	21.1986
68	333.2	13.3466	4.882	7.11875	13.5614	19.66	21.235
67	333.3	13.3796	4.90333	7.15083	13.575	19.706	21.2833
66	333.4	13.4057	4.94143	7.17	13.6017	19.7225	21.298
65	333.5	13.4308	4.946	7.18333	13.6013	19.7615	21.3213
64	333.6	13.4602	4.96667	7.20917	13.6156	19.7908	21.3488
63	333.7	13.4897	4.982	7.23778	13.6322	19.8241	21.3936
62	333.8	13.513	4.99333	7.25889	13.6433	19.8413	21.42
61	333.9	13.5391	5.01667	7.28714	13.652	19.8593	21.44
60	334	13.5582	5.05	7.30214	13.6529	19.8913	21.4633
59	334.1	13.5798	5.05538	7.322	13.655	19.915	21.506
58	334.2	13.6015	5.06	7.34571	13.6722	19.9231	21.515
57	334.3	13.6239	5.08714	7.37	13.68	19.9444	21.5383
56	334.4	13.6449	5.09923	7.38545	13.689	19.9625	21.545
55	334.5	13.6665	5.132	7.424	13.718	19.9782	21.5773
54	334.6	13.6859	5.15	7.446	13.7375	19.9867	21.6
53	334.7	13.7049	5.17333	7.465	13.7462	20.0033	21.6217
52	334.8	13.724	5.19333	7.49	13.765	20.0018	21.6356
51	334.9	13.7385	5.2025	7.51091	13.79	20.001	21.63
50	335	13.7603	5.23	7.536	13.8243	20.017	21.63
49	335.1	13.7723	5.25333	7.55684	13.8478	20.0086	21.6367
48	335.2	13.7903	5.265	7.59333	13.854	20.015	21.648
47	335.3	13.8021	5.26833	7.59812	13.8645	20.015	21.664
46	335.4	13.8215	5.28333	7.63211	13.885	20.0089	21.6675
45	335.5	13.8349	5.3	7.67182	13.9043	20.0057	21.68
44	335.6	13.8399	5.3025	7.68444	13.9186	19.976	21.6643
43	335.7	13.8658	5.33	7.711	13.93	19.9888	21.67
42	335.8	13.8723	5.33714	7.73	13.9433	19.9847	21.6625
41	335.9	13.8774	5.34143	7.758	13.947	19.96	21.6633
40	336	13.8984	5.34	7.7875	13.9743	19.98	21.691
39	336.1	13.9092	5.35	7.81	13.98	19.97	21.7
38	336.2	13.9186	5.365	7.84133	14.01	19.97	21.6943
37	336.3	13.9317	5.39	7.862	14.0337	19.949	21.7017
36	336.4	13.9395	5.398	7.90111	14.04	19.9533	21.6871
35	336.5	13.9557	5.42	7.92067	14.0829	19.9357	21.6944
34	336.6	13.9661	5.43	7.94333	14.1029	19.9543	21.678
33	336.7	13.9712	5.44	7.97286	14.1194	19.8971	21.66
32	336.8	13.9848	5.44714	7.9975	14.15	19.8969	21.668
31	336.9	13.9971	5.46167	8.025	14.1783	19.8979	21.6817
30	337	14.0061	5.4625	8.0575	14.1921	19.887	21.6725
29	337.1	14.0189	5.47333	8.09125	14.2262	19.89	21.6729
28	337.2	14.0288	5.48	8.12	14.2414	19.8667	21.648
27	337.3	14.0373	5.4975	8.158	14.2525	19.8467	21.649
26	337.4	14.0526	5.505	8.19857	14.2706	19.8471	21.6483
25	337.5	14.0562	5.51	8.23143	14.2727	19.816	21.646
24	337.6	14.0671	5.51111	8.26182	14.2768	19.802	21.664
23	337.7	14.0775	5.51286	8.28333	14.308	19.765	21.676
22	337.8	14.0861	5.51429	8.31	14.32	19.7633	21.68
21	337.9	14.0923	5.532	8.3325	14.3262	19.733	21.6733
20	338	14.1056	5.5375	8.35875	14.3322	19.72	21.672
19	338.1	14.119	5.54	8.384	14.3471	19.722	21.695
18	338.2	14.1284	5.54	8.40556	14.3617	19.7027	21.696
17	338.3	14.143	5.54857	8.435	14.395	19.6967	21.6883
16	338.4	14.1503	5.55556	8.4575	14.4108	19.6983	21.705
15	338.5	14.1654	5.55857	8.47667	14.425	19.7129	21.71
14	338.6	14.1826	5.56	8.4975	14.4618	19.715	21.702
13	338.7	14.1844	5.5825	8.52714	14.4663	19.7075	21.71
12	338.8	14.1951	5.592	8.536	14.47	19.685	21.715
11	338.9	14.2136	5.59778	8.565	14.478	19.7071	21.731
10	339	14.2262	5.615	8.58667	14.497	19.7067	21.736
9	339.1	14.2329	5.62333	8.60222	14.4971	19.702	21.7357
8	339.2	14.2431	5.626	8.61091	14.511	19.7164	21.7389
7	339.3	14.2537	5.63	8.61357	14.5238	19.7326	21.7525
6	339.4	14.2707	5.64286	8.61833	14.55	19.7336	21.7614
5	339.5	14.2813	5.65	8.635	14.568	19.7393	21.78
4	339.6	14.2956	5.654	8.64667	14.5808	19.7767	21.798
3	339.7	14.312	5.66571	8.66333	14.602	19.7933	21.81
2	339.8	14.3252	5.67	8.686	14.6191	19.8014	21.8414
1	339.9	14.3389	5.675	8.69556	14.6477	19.815	21.855
0	340	14.3588	5.68	8.715	14.67	19.844	21.898

## Sheet: strontium
	age	mean	5	16	50	84	95
750	265	0.706802	0.706792	0.706797	0.706803	0.706808	0.706809
749	265.1	0.70681	0.706801	0.706803	0.706809	0.706817	0.706819
748	265.2	0.706818	0.706811	0.706812	0.706816	0.706819	0.706826
747	265.3	0.706826	0.70682	0.706822	0.706825	0.706828	0.70683
746	265.4	0.706833	0.70683	0.706831	0.706835	0.706838	0.706839
745	265.5	0.70684	0.706831	0.706834	0.706842	0.706847	0.706849
744	265.6	0.706847	0.706841	0.706842	0.706845	0.706849	0.706851
743	265.7	0.706854	0.70685	0.706852	0.706855	0.706858	0.706859
742	265.8	0.706861	0.706852	0.706857	0.706863	0.706868	0.706869
741	265.9	0.706868	0.706861	0.706862	0.706865	0.706869	0.70687
740	266	0.706874	0.70687	0.706872	0.706875	0.706878	0.706879
739	266.1	0.70688	0.706871	0.706873	0.70688	0.706887	0.706889
738	266.2	0.706886	0.706881	0.706882	0.706885	0.706888	0.70689
737	266.3	0.706892	0.706885	0.706891	0.706894	0.706898	0.706899
736	266.4	0.706897	0.706891	0.706892	0.706895	0.706899	0.7069
735	266.5	0.706903	0.7069	0.706901	0.706905	0.706908	0.706909
734	266.6	0.706908	0.706901	0.706902	0.706905	0.706909	0.70691
733	266.7	0.706913	0.70691	0.706912	0.706915	0.706918	0.706919
732	266.8	0.706917	0.706911	0.706912	0.706915	0.706919	0.70692
731	266.9	0.706922	0.70692	0.706921	0.706925	0.706928	0.706929
730	267	0.706926	0.706921	0.706922	0.706925	0.706928	0.70693
729	267.1	0.706931	0.706922	0.706925	0.706933	0.706938	0.706939
728	267.2	0.706935	0.70693	0.706932	0.706935	0.706938	0.706939
727	267.3	0.706938	0.706931	0.706932	0.706936	0.706939	0.706945
726	267.4	0.706942	0.70694	0.706941	0.706945	0.706948	0.706949
725	267.5	0.706946	0.70694	0.706942	0.706945	0.706948	0.706949
724	267.6	0.706949	0.706941	0.706942	0.706946	0.706952	0.706958
723	267.7	0.706952	0.70695	0.706951	0.706955	0.706958	0.706959
722	267.8	0.706955	0.70695	0.706952	0.706955	0.706958	0.706959
721	267.9	0.706958	0.706951	0.706952	0.706955	0.706959	0.706963
720	268	0.706961	0.706952	0.706957	0.706963	0.706968	0.706969
719	268.1	0.706963	0.70696	0.706962	0.706965	0.706968	0.706969
718	268.2	0.706966	0.70696	0.706962	0.706965	0.706968	0.706969
717	268.3	0.706968	0.706961	0.706962	0.706965	0.706969	0.706973
716	268.4	0.70697	0.706961	0.706964	0.706971	0.706977	0.706979
715	268.5	0.706972	0.70697	0.706971	0.706975	0.706978	0.706979
714	268.6	0.706974	0.70697	0.706972	0.706975	0.706978	0.706979
713	268.7	0.706976	0.70697	0.706972	0.706975	0.706978	0.706979
712	268.8	0.706977	0.706971	0.706972	0.706975	0.706979	0.70698
711	268.9	0.706979	0.706971	0.706972	0.706976	0.706982	0.706987
710	269	0.70698	0.706971	0.706973	0.706981	0.706987	0.706989
709	269.1	0.706981	0.706973	0.70698	0.706984	0.706988	0.706989
708	269.2	0.706982	0.70698	0.706981	0.706985	0.706988	0.706989
707	269.3	0.706983	0.70698	0.706982	0.706985	0.706988	0.706989
706	269.4	0.706984	0.70698	0.706982	0.706985	0.706988	0.706989
705	269.5	0.706985	0.70698	0.706982	0.706985	0.706988	0.706989
704	269.6	0.706986	0.706981	0.706982	0.706985	0.706988	0.70699
703	269.7	0.706986	0.706981	0.706982	0.706985	0.706988	0.70699
702	269.8	0.706987	0.706981	0.706982	0.706985	0.706988	0.70699
701	269.9	0.706987	0.706981	0.706982	0.706985	0.706989	0.70699
700	270	0.706988	0.706981	0.706982	0.706985	0.706989	0.70699
699	270.1	0.706988	0.706981	0.706982	0.706985	0.706989	0.706991
698	270.2	0.706988	0.706981	0.706982	0.706985	0.706989	0.706993
697	270.3	0.706988	0.706981	0.706982	0.706985	0.706989	0.706993
696	270.4	0.706988	0.706981	0.706982	0.706985	0.706989	0.706993
695	270.5	0.706988	0.706981	0.706982	0.706985	0.706989	0.706992
694	270.6	0.706988	0.706981	0.706982	0.706985	0.706989	0.70699
693	270.7	0.706988	0.706981	0.706982	0.706985	0.706989	0.70699
692	270.8	0.706987	0.706981	0.706982	0.706985	0.706989	0.70699
691	270.9	0.706987	0.706981	0.706982	0.706985	0.706989	0.70699
690	271	0.706987	0.706981	0.706982	0.706985	0.706988	0.70699
689	271.1	0.706986	0.706981	0.706982	0.706985	0.706988	0.70699
688	271.2	0.706986	0.70698	0.706982	0.706985	0.706988	0.706989
687	271.3	0.706986	0.70698	0.706982	0.706985	0.706988	0.706989
686	271.4	0.706985	0.70698	0.706982	0.706985	0.706988	0.706989
685	271.5	0.706985	0.70698	0.706982	0.706985	0.706988	0.706989
684	271.6	0.706984	0.70698	0.706982	0.706985	0.706988	0.706989
683	271.7	0.706983	0.70698	0.706982	0.706985	0.706988	0.706989
682	271.8	0.706983	0.70698	0.706981	0.706985	0.706988	0.706989
681	271.9	0.706982	0.70698	0.706981	0.706985	0.706988	0.706989
680	272	0.706982	0.706975	0.706981	0.706984	0.706988	0.706989
679	272.1	0.706981	0.706972	0.706977	0.706984	0.706988	0.706989
678	272.2	0.70698	0.706971	0.706974	0.706982	0.706987	0.706989
677	272.3	0.70698	0.706971	0.706973	0.706979	0.706986	0.706989
676	272.4	0.706979	0.706971	0.706972	0.706977	0.706983	0.706988
675	272.5	0.706979	0.706971	0.706972	0.706976	0.706979	0.706985
674	272.6	0.706978	0.706971	0.706972	0.706975	0.706979	0.706981
673	272.7	0.706977	0.706971	0.706972	0.706975	0.706979	0.70698
672	272.8	0.706977	0.706971	0.706972	0.706975	0.706978	0.70698
671	272.9	0.706976	0.706971	0.706972	0.706975	0.706978	0.70698
670	273	0.706976	0.70697	0.706972	0.706975	0.706978	0.706979
669	273.1	0.706975	0.70697	0.706972	0.706975	0.706978	0.706979
668	273.2	0.706975	0.70697	0.706972	0.706975	0.706978	0.706979
667	273.3	0.706974	0.70697	0.706972	0.706975	0.706978	0.706979
666	273.4	0.706974	0.70697	0.706972	0.706975	0.706978	0.706979
665	273.5	0.706973	0.70697	0.706972	0.706975	0.706978	0.706979
664	273.6	0.706973	0.70697	0.706971	0.706975	0.706978	0.706979
663	273.7	0.706973	0.70697	0.706971	0.706975	0.706978	0.706979
662	273.8	0.706972	0.706969	0.706971	0.706975	0.706978	0.706979
661	273.9	0.706972	0.706966	0.706971	0.706975	0.706978	0.706979
660	274	0.706972	0.706965	0.706971	0.706974	0.706978	0.706979
659	274.1	0.706972	0.706964	0.70697	0.706974	0.706978	0.706979
658	274.2	0.706971	0.706963	0.70697	0.706974	0.706978	0.706979
657	274.3	0.706971	0.706963	0.70697	0.706974	0.706978	0.706979
656	274.4	0.706971	0.706963	0.706969	0.706974	0.706978	0.706979
655	274.5	0.706971	0.706963	0.706969	0.706974	0.706978	0.706979
654	274.6	0.706971	0.706963	0.70697	0.706974	0.706978	0.706979
653	274.7	0.706972	0.706964	0.70697	0.706974	0.706978	0.706979
652	274.8	0.706972	0.706965	0.706971	0.706974	0.706978	0.706979
651	274.9	0.706972	0.706966	0.706971	0.706975	0.706978	0.706979
650	275	0.706972	0.70697	0.706971	0.706975	0.706978	0.706979
649	275.1	0.706973	0.70697	0.706971	0.706975	0.706978	0.706979
648	275.2	0.706973	0.70697	0.706971	0.706975	0.706978	0.706979
647	275.3	0.706974	0.70697	0.706972	0.706975	0.706978	0.706979
646	275.4	0.706974	0.70697	0.706972	0.706975	0.706978	0.706979
645	275.5	0.706975	0.70697	0.706972	0.706975	0.706978	0.706979
644	275.6	0.706975	0.70697	0.706972	0.706975	0.706978	0.706979
643	275.7	0.706976	0.706971	0.706972	0.706975	0.706978	0.70698
642	275.8	0.706977	0.706971	0.706972	0.706975	0.706979	0.70698
641	275.9	0.706978	0.706971	0.706972	0.706975	0.706979	0.70698
640	276	0.706979	0.706971	0.706972	0.706976	0.70698	0.706987
639	276.1	0.70698	0.706971	0.706973	0.706979	0.706986	0.706989
638	276.2	0.706981	0.706972	0.706975	0.706983	0.706988	0.706989
637	276.3	0.706982	0.706976	0.706981	0.706985	0.706988	0.706989
636	276.4	0.706983	0.70698	0.706982	0.706985	0.706988	0.706989
635	276.5	0.706984	0.70698	0.706982	0.706985	0.706988	0.706989
634	276.6	0.706986	0.706981	0.706982	0.706985	0.706988	0.70699
633	276.7	0.706987	0.706981	0.706982	0.706985	0.706989	0.70699
632	276.8	0.706989	0.706981	0.706982	0.706986	0.70699	0.706996
631	276.9	0.70699	0.706981	0.706983	0.706991	0.706997	0.706999
630	277	0.706992	0.706984	0.70699	0.706994	0.706998	0.706999
629	277.1	0.706993	0.70699	0.706992	0.706995	0.706998	0.706999
628	277.2	0.706995	0.70699	0.706992	0.706995	0.706998	0.706999
627	277.3	0.706997	0.706991	0.706992	0.706995	0.706998	0.707
626	277.4	0.706999	0.706991	0.706992	0.706996	0.707	0.707007
625	277.5	0.707001	0.706991	0.706995	0.707002	0.707008	0.707009
624	277.6	0.707003	0.707	0.707001	0.707005	0.707008	0.707009
623	277.7	0.707005	0.707	0.707002	0.707005	0.707008	0.707009
622	277.8	0.707007	0.707001	0.707002	0.707005	0.707008	0.70701
621	277.9	0.707009	0.707001	0.707002	0.707006	0.70701	0.707017
620	278	0.707011	0.707002	0.707006	0.707013	0.707018	0.707019
619	278.1	0.707013	0.70701	0.707012	0.707015	0.707018	0.707019
618	278.2	0.707015	0.70701	0.707012	0.707015	0.707018	0.707019
617	278.3	0.707018	0.707011	0.707012	0.707015	0.707019	0.70702
616	278.4	0.70702	0.707011	0.707013	0.70702	0.707027	0.707029
615	278.5	0.707022	0.70702	0.707021	0.707025	0.707028	0.707029
614	278.6	0.707025	0.70702	0.707022	0.707025	0.707028	0.707029
613	278.7	0.707027	0.707021	0.707022	0.707025	0.707029	0.70703
612	278.8	0.70703	0.707021	0.707023	0.70703	0.707037	0.707039
611	278.9	0.707033	0.70703	0.707031	0.707035	0.707038	0.707039
610	279	0.707035	0.70703	0.707032	0.707035	0.707038	0.707039
609	279.1	0.707038	0.707031	0.707032	0.707035	0.707039	0.70704
608	279.2	0.70704	0.707031	0.707034	0.707042	0.707047	0.707049
607	279.3	0.707043	0.70704	0.707042	0.707045	0.707048	0.707049
606	279.4	0.707046	0.707041	0.707042	0.707045	0.707048	0.70705
605	279.5	0.707049	0.707041	0.707042	0.707046	0.70705	0.707057
604	279.6	0.707052	0.707043	0.70705	0.707054	0.707058	0.707059
603	279.7	0.707054	0.70705	0.707052	0.707055	0.707058	0.707059
602	279.8	0.707057	0.707051	0.707052	0.707055	0.707059	0.70706
601	279.9	0.70706	0.707051	0.707053	0.70706	0.707067	0.707069
600	280	0.707063	0.70706	0.707061	0.707065	0.707068	0.707069
599	280.1	0.707066	0.707061	0.707062	0.707065	0.707068	0.70707
598	280.2	0.707069	0.707061	0.707062	0.707066	0.707072	0.707077
597	280.3	0.707072	0.707065	0.707071	0.707074	0.707078	0.707079
596	280.4	0.707075	0.70707	0.707072	0.707075	0.707078	0.707079
595	280.5	0.707078	0.707071	0.707072	0.707075	0.707079	0.707082
594	280.6	0.707081	0.707072	0.707075	0.707083	0.707088	0.707089
593	280.7	0.707084	0.70708	0.707082	0.707085	0.707088	0.707089
592	280.8	0.707087	0.707081	0.707082	0.707085	0.707089	0.70709
591	280.9	0.70709	0.707081	0.707083	0.707089	0.707096	0.707099
590	281	0.707093	0.70709	0.707091	0.707095	0.707098	0.707099
589	281.1	0.707096	0.707091	0.707092	0.707095	0.707098	0.7071
588	281.2	0.707099	0.707091	0.707092	0.707096	0.707103	0.707108
587	281.3	0.707102	0.707095	0.707101	0.707104	0.707108	0.707109
586	281.4	0.707105	0.707101	0.707102	0.707105	0.707108	0.70711
585	281.5	0.707108	0.707101	0.707102	0.707106	0.707109	0.707115
584	281.6	0.707111	0.707102	0.707106	0.707113	0.707118	0.707119
583	281.7	0.707114	0.70711	0.707112	0.707115	0.707118	0.707119
582	281.8	0.707117	0.707111	0.707112	0.707115	0.707119	0.70712
581	281.9	0.70712	0.707111	0.707113	0.707121	0.707127	0.707129
580	282	0.707123	0.70712	0.707121	0.707125	0.707128	0.707129
579	282.1	0.707126	0.707121	0.707122	0.707125	0.707129	0.70713
578	282.2	0.707129	0.707121	0.707122	0.707127	0.707134	0.707138
577	282.3	0.707132	0.707125	0.707131	0.707134	0.707138	0.707139
576	282.4	0.707135	0.70713	0.707132	0.707135	0.707138	0.70714
575	282.5	0.707138	0.707131	0.707132	0.707136	0.70714	0.707146
574	282.6	0.707141	0.707132	0.707136	0.707143	0.707148	0.707149
573	282.7	0.707144	0.70714	0.707142	0.707145	0.707148	0.70715
572	282.8	0.707147	0.707141	0.707142	0.707145	0.707149	0.70715
571	282.9	0.70715	0.707141	0.707143	0.707149	0.707157	0.707159
570	283	0.707153	0.707148	0.707151	0.707155	0.707158	0.707159
569	283.1	0.707156	0.70715	0.707152	0.707155	0.707159	0.70716
568	283.2	0.707159	0.707151	0.707152	0.707156	0.707163	0.707168
567	283.3	0.707161	0.707152	0.707157	0.707164	0.707168	0.707169
566	283.4	0.707164	0.70716	0.707162	0.707165	0.707168	0.70717
565	283.5	0.707167	0.707161	0.707162	0.707165	0.707169	0.707174
564	283.6	0.70717	0.707161	0.707163	0.70717	0.707177	0.707179
563	283.7	0.707173	0.707169	0.707171	0.707175	0.707178	0.707179
562	283.8	0.707176	0.70717	0.707172	0.707175	0.707179	0.70718
561	283.9	0.707179	0.707171	0.707172	0.707177	0.707183	0.707188
560	284	0.707181	0.707172	0.707177	0.707183	0.707188	0.707189
559	284.1	0.707184	0.70718	0.707181	0.707185	0.707188	0.70719
558	284.2	0.707187	0.707181	0.707182	0.707185	0.707189	0.707193
557	284.3	0.70719	0.707181	0.707183	0.707189	0.707196	0.707199
556	284.4	0.707193	0.707186	0.707191	0.707195	0.707198	0.707199
555	284.5	0.707195	0.70719	0.707192	0.707195	0.707199	0.7072
554	284.6	0.707198	0.707191	0.707192	0.707196	0.707202	0.707207
553	284.7	0.707201	0.707192	0.707195	0.707203	0.707208	0.707209
552	284.8	0.707204	0.7072	0.707201	0.707205	0.707208	0.70721
551	284.9	0.707206	0.707201	0.707202	0.707205	0.707209	0.70721
550	285	0.707209	0.707201	0.707202	0.707208	0.707215	0.707219
549	285.1	0.707212	0.707204	0.70721	0.707214	0.707218	0.707219
548	285.2	0.707215	0.70721	0.707212	0.707215	0.707218	0.70722
547	285.3	0.707218	0.707211	0.707212	0.707216	0.70722	0.707226
546	285.4	0.70722	0.707211	0.707214	0.707221	0.707227	0.707229
545	285.5	0.707223	0.70722	0.707221	0.707225	0.707228	0.707229
544	285.6	0.707226	0.70722	0.707222	0.707225	0.707229	0.70723
543	285.7	0.707229	0.707221	0.707222	0.707227	0.707234	0.707238
542	285.8	0.707232	0.707223	0.707229	0.707234	0.707238	0.707239
541	285.9	0.707235	0.70723	0.707232	0.707235	0.707238	0.70724
540	286	0.707237	0.707231	0.707232	0.707236	0.707239	0.707245
539	286.1	0.70724	0.707231	0.707234	0.707241	0.707247	0.707249
538	286.2	0.707243	0.70724	0.707241	0.707245	0.707248	0.707249
537	286.3	0.707246	0.707241	0.707242	0.707245	0.707249	0.70725
536	286.4	0.707249	0.707241	0.707242	0.707248	0.707255	0.707259
535	286.5	0.707252	0.707245	0.707251	0.707254	0.707258	0.707259
534	286.6	0.707255	0.70725	0.707252	0.707255	0.707258	0.70726
533	286.7	0.707258	0.707251	0.707252	0.707256	0.707262	0.707267
532	286.8	0.707261	0.707252	0.707258	0.707264	0.707268	0.707269
531	286.9	0.707265	0.70726	0.707262	0.707265	0.707268	0.70727
530	287	0.707268	0.707261	0.707262	0.707266	0.70727	0.707276
529	287.1	0.707271	0.707262	0.707266	0.707273	0.707278	0.707279
528	287.2	0.707274	0.70727	0.707272	0.707275	0.707278	0.70728
527	287.3	0.707278	0.707271	0.707272	0.707276	0.707279	0.707285
526	287.4	0.707281	0.707272	0.707276	0.707283	0.707288	0.707289
525	287.5	0.707284	0.70728	0.707282	0.707285	0.707288	0.70729
524	287.6	0.707288	0.707281	0.707282	0.707286	0.707289	0.707295
523	287.7	0.707291	0.707283	0.707288	0.707294	0.707298	0.707299
522	287.8	0.707295	0.70729	0.707292	0.707295	0.707298	0.7073
521	287.9	0.707299	0.707291	0.707292	0.707296	0.707301	0.707307
520	288	0.707302	0.707298	0.707301	0.707305	0.707308	0.707309
519	288.1	0.707306	0.707301	0.707302	0.707305	0.707308	0.70731
518	288.2	0.70731	0.707301	0.707303	0.707309	0.707316	0.707319
517	288.3	0.707314	0.70731	0.707312	0.707315	0.707318	0.707319
516	288.4	0.707318	0.707311	0.707312	0.707315	0.707319	0.70732
515	288.5	0.707322	0.707315	0.707321	0.707324	0.707328	0.707329
514	288.6	0.707326	0.707321	0.707322	0.707325	0.707328	0.70733
513	288.7	0.70733	0.707321	0.707323	0.70733	0.707337	0.707339
512	288.8	0.707334	0.70733	0.707332	0.707335	0.707338	0.707339
511	288.9	0.707339	0.707331	0.707332	0.707336	0.70734	0.707346
510	289	0.707343	0.70734	0.707342	0.707345	0.707348	0.707349
509	289.1	0.707347	0.707341	0.707342	0.707345	0.707349	0.70735
508	289.2	0.707352	0.70735	0.707351	0.707355	0.707358	0.707359
507	289.3	0.707357	0.707351	0.707352	0.707355	0.707358	0.70736
506	289.4	0.707361	0.707357	0.707361	0.707365	0.707368	0.707369
505	289.5	0.707366	0.70736	0.707362	0.707365	0.707368	0.707369
504	289.6	0.707371	0.707365	0.707371	0.707374	0.707378	0.707379
503	289.7	0.707376	0.70737	0.707372	0.707375	0.707378	0.707379
502	289.8	0.707381	0.70738	0.707381	0.707385	0.707388	0.707389
501	289.9	0.707387	0.70738	0.707382	0.707385	0.707388	0.707389
500	290	0.707392	0.70739	0.707392	0.707395	0.707398	0.707399
499	290.1	0.707397	0.70739	0.707392	0.707395	0.707398	0.707399
498	290.2	0.707403	0.7074	0.707402	0.707405	0.707408	0.707409
497	290.3	0.707408	0.707401	0.707402	0.707405	0.707408	0.70741
496	290.4	0.707414	0.70741	0.707412	0.707415	0.707418	0.707419
495	290.5	0.70742	0.707411	0.707412	0.707417	0.707424	0.707428
494	290.6	0.707426	0.70742	0.707422	0.707425	0.707428	0.707429
493	290.7	0.707431	0.70743	0.707432	0.707435	0.707438	0.707439
492	290.8	0.707438	0.70743	0.707432	0.707435	0.707438	0.707439
491	290.9	0.707444	0.70744	0.707442	0.707445	0.707448	0.707449
490	291	0.70745	0.707441	0.707443	0.707449	0.707456	0.707459
489	291.1	0.707456	0.70745	0.707452	0.707455	0.707458	0.707459
488	291.2	0.707463	0.70746	0.707462	0.707465	0.707468	0.707469
487	291.3	0.707469	0.707461	0.707462	0.707465	0.707468	0.70747
486	291.4	0.707476	0.70747	0.707472	0.707475	0.707478	0.707479
485	291.5	0.707483	0.70748	0.707482	0.707485	0.707488	0.707489
484	291.6	0.707489	0.70748	0.707482	0.707485	0.707488	0.707489
483	291.7	0.707496	0.70749	0.707492	0.707495	0.707498	0.707499
482	291.8	0.707503	0.7075	0.707502	0.707505	0.707508	0.707509
481	291.9	0.70751	0.70751	0.707512	0.707515	0.707518	0.707519
480	292	0.707518	0.70751	0.707512	0.707515	0.707518	0.707519
479	292.1	0.707525	0.70752	0.707522	0.707525	0.707528	0.707529
478	292.2	0.707532	0.70753	0.707532	0.707535	0.707538	0.707539
477	292.3	0.70754	0.707531	0.707532	0.707535	0.707539	0.70754
476	292.4	0.707547	0.70754	0.707542	0.707545	0.707548	0.707549
475	292.5	0.707555	0.70755	0.707552	0.707555	0.707558	0.707559
474	292.6	0.707562	0.70756	0.707562	0.707565	0.707568	0.707569
473	292.7	0.70757	0.707561	0.707565	0.707572	0.707578	0.707579
472	292.8	0.707578	0.70757	0.707572	0.707575	0.707578	0.707579
471	292.9	0.707586	0.70758	0.707582	0.707585	0.707588	0.707589
470	293	0.707594	0.70759	0.707592	0.707595	0.707598	0.707599
469	293.1	0.707602	0.7076	0.707602	0.707605	0.707608	0.707609
468	293.2	0.70761	0.707601	0.707603	0.707611	0.707617	0.707619
467	293.3	0.707618	0.707611	0.707612	0.707615	0.707618	0.70762
466	293.4	0.707626	0.70762	0.707622	0.707625	0.707628	0.707629
465	293.5	0.707635	0.70763	0.707632	0.707635	0.707638	0.707639
464	293.6	0.707643	0.70764	0.707642	0.707645	0.707648	0.707649
463	293.7	0.707652	0.70765	0.707651	0.707655	0.707658	0.707659
462	293.8	0.70766	0.707651	0.707653	0.70766	0.707667	0.707669
461	293.9	0.707669	0.707661	0.707662	0.707665	0.707669	0.70767
460	294	0.707677	0.70767	0.707672	0.707675	0.707678	0.707679
459	294.1	0.707686	0.70768	0.707682	0.707685	0.707688	0.707689
458	294.2	0.707694	0.70769	0.707692	0.707695	0.707698	0.707699
457	294.3	0.707703	0.7077	0.707702	0.707705	0.707708	0.707709
456	294.4	0.707712	0.70771	0.707711	0.707715	0.707718	0.707719
455	294.5	0.70772	0.707711	0.707715	0.707722	0.707728	0.707729
454	294.6	0.707729	0.707721	0.707722	0.707726	0.707731	0.707737
453	294.7	0.707738	0.707731	0.707732	0.707735	0.707739	0.70774
452	294.8	0.707747	0.707741	0.707742	0.707745	0.707748	0.70775
451	294.9	0.707756	0.70775	0.707752	0.707755	0.707758	0.707759
450	295	0.707764	0.70776	0.707762	0.707765	0.707768	0.707769
449	295.1	0.707773	0.70777	0.707772	0.707775	0.707778	0.707779
448	295.2	0.707782	0.70778	0.707781	0.707785	0.707788	0.707789
447	295.3	0.707791	0.707782	0.707787	0.707794	0.707798	0.707799
446	295.4	0.7078	0.707791	0.707793	0.707798	0.707806	0.707809
445	295.5	0.707809	0.707801	0.707802	0.707806	0.707809	0.707815
444	295.6	0.707817	0.707811	0.707812	0.707815	0.707818	0.70782
443	295.7	0.707826	0.707821	0.707822	0.707825	0.707828	0.70783
442	295.8	0.707835	0.70783	0.707832	0.707835	0.707838	0.707839
441	295.9	0.707844	0.70784	0.707842	0.707845	0.707848	0.707849
440	296	0.707852	0.70785	0.707851	0.707855	0.707858	0.707859
439	296.1	0.707861	0.707853	0.707858	0.707864	0.707868	0.707869
438	296.2	0.70787	0.707861	0.707863	0.707869	0.707876	0.707879
437	296.3	0.707878	0.707871	0.707872	0.707876	0.707879	0.707885
436	296.4	0.707887	0.707881	0.707882	0.707885	0.707888	0.70789
435	296.5	0.707896	0.70789	0.707892	0.707895	0.707898	0.707899
434	296.6	0.707904	0.7079	0.707902	0.707905	0.707908	0.707909
433	296.7	0.707912	0.70791	0.707911	0.707915	0.707918	0.707919
432	296.8	0.707921	0.707912	0.707916	0.707923	0.707928	0.707929
431	296.9	0.707929	0.707921	0.707922	0.707927	0.707933	0.707938
430	297	0.707937	0.707931	0.707932	0.707935	0.707939	0.70794
429	297.1	0.707946	0.707941	0.707942	0.707945	0.707948	0.70795
428	297.2	0.707954	0.70795	0.707952	0.707955	0.707958	0.707959
427	297.3	0.707962	0.707958	0.707961	0.707965	0.707968	0.707969
426	297.4	0.70797	0.707961	0.707963	0.707969	0.707976	0.707979
425	297.5	0.707978	0.707971	0.707972	0.707975	0.707979	0.70798
424	297.6	0.707986	0.70798	0.707982	0.707985	0.707988	0.707989
423	297.7	0.707993	0.70799	0.707992	0.707995	0.707998	0.707999
422	297.8	0.708001	0.707992	0.707998	0.708004	0.708008	0.708009
421	297.9	0.708009	0.708001	0.708002	0.708006	0.70801	0.708016
420	298	0.708016	0.708011	0.708012	0.708015	0.708018	0.70802
419	298.1	0.708023	0.70802	0.708022	0.708025	0.708028	0.708029
418	298.2	0.708031	0.708022	0.708026	0.708033	0.708038	0.708039
417	298.3	0.708038	0.708031	0.708032	0.708035	0.708039	0.70804
416	298.4	0.708045	0.70804	0.708042	0.708045	0.708048	0.708049
415	298.5	0.708052	0.70805	0.708051	0.708055	0.708058	0.708059
414	298.6	0.708059	0.708051	0.708052	0.708056	0.70806	0.708067
413	298.7	0.708066	0.70806	0.708062	0.708065	0.708068	0.708069
412	298.8	0.708072	0.70807	0.708071	0.708075	0.708078	0.708079
411	298.9	0.708079	0.708071	0.708072	0.708076	0.70808	0.708086
410	299	0.708085	0.70808	0.708082	0.708085	0.708088	0.708089
409	299.1	0.708092	0.708087	0.708091	0.708095	0.708098	0.708099
408	299.2	0.708098	0.708091	0.708092	0.708095	0.708098	0.7081
407	299.3	0.708104	0.7081	0.708102	0.708105	0.708108	0.708109
406	299.4	0.70811	0.708101	0.708103	0.708108	0.708116	0.708119
405	299.5	0.708116	0.70811	0.708112	0.708115	0.708118	0.708119
404	299.6	0.708121	0.708115	0.708121	0.708124	0.708128	0.708129
403	299.7	0.708127	0.70812	0.708122	0.708125	0.708128	0.708129
402	299.8	0.708132	0.70813	0.708132	0.708135	0.708138	0.708139
401	299.9	0.708138	0.708131	0.708132	0.708135	0.708138	0.70814
400	300	0.708143	0.70814	0.708142	0.708145	0.708148	0.708149
399	300.1	0.708148	0.708141	0.708142	0.708145	0.708148	0.70815
398	300.2	0.708153	0.70815	0.708152	0.708155	0.708158	0.708159
397	300.3	0.708158	0.708151	0.708152	0.708155	0.708158	0.70816
396	300.4	0.708162	0.70816	0.708162	0.708165	0.708168	0.708169
395	300.5	0.708167	0.70816	0.708162	0.708165	0.708168	0.708169
394	300.6	0.708171	0.70817	0.708171	0.708175	0.708178	0.708179
393	300.7	0.708176	0.70817	0.708172	0.708175	0.708178	0.708179
392	300.8	0.70818	0.708171	0.708173	0.708179	0.708186	0.708189
391	300.9	0.708184	0.70818	0.708182	0.708185	0.708188	0.708189
390	301	0.708188	0.70818	0.708182	0.708185	0.708188	0.708189
389	301.1	0.708192	0.70819	0.708192	0.708195	0.708198	0.708199
388	301.2	0.708195	0.70819	0.708192	0.708195	0.708198	0.708199
387	301.3	0.708199	0.708191	0.708192	0.708195	0.708199	0.7082
386	301.4	0.708202	0.7082	0.708202	0.708205	0.708208	0.708209
385	301.5	0.708206	0.7082	0.708202	0.708205	0.708208	0.708209
384	301.6	0.708209	0.708201	0.708202	0.708205	0.708208	0.70821
383	301.7	0.708212	0.70821	0.708212	0.708215	0.708218	0.708219
382	301.8	0.708215	0.70821	0.708212	0.708215	0.708218	0.708219
381	301.9	0.708218	0.70821	0.708212	0.708215	0.708218	0.708219
380	302	0.70822	0.708214	0.70822	0.708224	0.708228	0.708229
379	302.1	0.708223	0.70822	0.708222	0.708225	0.708228	0.708229
378	302.2	0.708226	0.70822	0.708222	0.708225	0.708228	0.708229
377	302.3	0.708228	0.70822	0.708222	0.708225	0.708228	0.708229
376	302.4	0.70823	0.708223	0.708229	0.708234	0.708238	0.708239
375	302.5	0.708232	0.70823	0.708232	0.708235	0.708238	0.708239
374	302.6	0.708235	0.70823	0.708232	0.708235	0.708238	0.708239
373	302.7	0.708237	0.70823	0.708232	0.708235	0.708238	0.708239
372	302.8	0.708238	0.70823	0.708232	0.708235	0.708238	0.708239
371	302.9	0.70824	0.708233	0.708238	0.708244	0.708248	0.708249
370	303	0.708242	0.70824	0.708242	0.708245	0.708248	0.708249
369	303.1	0.708243	0.70824	0.708242	0.708245	0.708248	0.708249
368	303.2	0.708245	0.70824	0.708242	0.708245	0.708248	0.708249
367	303.3	0.708246	0.70824	0.708242	0.708245	0.708248	0.708249
366	303.4	0.708248	0.70824	0.708242	0.708245	0.708248	0.708249
365	303.5	0.708249	0.70824	0.708242	0.708245	0.708248	0.708249
364	303.6	0.70825	0.70825	0.708252	0.708255	0.708258	0.708259
363	303.7	0.708251	0.70825	0.708252	0.708255	0.708258	0.708259
362	303.8	0.708252	0.70825	0.708252	0.708255	0.708258	0.708259
361	303.9	0.708253	0.70825	0.708252	0.708255	0.708258	0.708259
360	304	0.708254	0.70825	0.708252	0.708255	0.708258	0.708259
359	304.1	0.708255	0.70825	0.708252	0.708255	0.708258	0.708259
358	304.2	0.708256	0.70825	0.708252	0.708255	0.708258	0.708259
357	304.3	0.708257	0.70825	0.708252	0.708255	0.708258	0.708259
356	304.4	0.708257	0.70825	0.708252	0.708255	0.708258	0.708259
355	304.5	0.708258	0.70825	0.708252	0.708255	0.708258	0.708259
354	304.6	0.708258	0.70825	0.708252	0.708255	0.708258	0.708259
353	304.7	0.708259	0.70825	0.708252	0.708255	0.708258	0.708259
352	304.8	0.708259	0.70825	0.708252	0.708255	0.708258	0.708259
351	304.9	0.70826	0.708251	0.708252	0.708255	0.708258	0.70826
350	305	0.70826	0.70826	0.708261	0.708265	0.708268	0.708269
349	305.1	0.708261	0.70826	0.708262	0.708265	0.708268	0.708269
348	305.2	0.708261	0.70826	0.708262	0.708265	0.708268	0.708269
347	305.3	0.708261	0.70826	0.708262	0.708265	0.708268	0.708269
346	305.4	0.708261	0.70826	0.708262	0.708265	0.708268	0.708269
345	305.5	0.708262	0.70826	0.708262	0.708265	0.708268	0.708269
344	305.6	0.708262	0.70826	0.708262	0.708265	0.708268	0.708269
343	305.7	0.708262	0.70826	0.708262	0.708265	0.708268	0.708269
342	305.8	0.708262	0.70826	0.708262	0.708265	0.708268	0.708269
341	305.9	0.708263	0.70826	0.708262	0.708265	0.708268	0.708269
340	306	0.708263	0.70826	0.708262	0.708265	0.708268	0.708269
339	306.1	0.708263	0.70826	0.708262	0.708265	0.708268	0.708269
338	306.2	0.708263	0.70826	0.708262	0.708265	0.708268	0.708269
337	306.3	0.708263	0.70826	0.708262	0.708265	0.708268	0.708269
336	306.4	0.708263	0.70826	0.708262	0.708265	0.708268	0.708269
335	306.5	0.708264	0.70826	0.708262	0.708265	0.708268	0.708269
334	306.6	0.708264	0.70826	0.708262	0.708265	0.708268	0.708269
333	306.7	0.708264	0.70826	0.708262	0.708265	0.708268	0.708269
332	306.8	0.708264	0.70826	0.708262	0.708265	0.708268	0.708269
331	306.9	0.708264	0.70826	0.708262	0.708265	0.708268	0.708269
330	307	0.708265	0.70826	0.708262	0.708265	0.708268	0.708269
329	307.1	0.708265	0.70826	0.708262	0.708265	0.708268	0.708269
328	307.2	0.708265	0.70826	0.708262	0.708265	0.708268	0.708269
327	307.3	0.708265	0.70826	0.708262	0.708265	0.708268	0.708269
326	307.4	0.708266	0.70826	0.708262	0.708265	0.708268	0.708269
325	307.5	0.708266	0.70826	0.708262	0.708265	0.708268	0.708269
324	307.6	0.708266	0.70826	0.708262	0.708265	0.708268	0.708269
323	307.7	0.708267	0.70826	0.708262	0.708265	0.708268	0.708269
322	307.8	0.708267	0.70826	0.708262	0.708265	0.708268	0.708269
321	307.9	0.708267	0.70826	0.708262	0.708265	0.708268	0.708269
320	308	0.708268	0.70826	0.708262	0.708265	0.708268	0.708269
319	308.1	0.708268	0.70826	0.708262	0.708265	0.708268	0.708269
318	308.2	0.708269	0.70826	0.708262	0.708265	0.708268	0.708269
317	308.3	0.708269	0.708261	0.708262	0.708265	0.708268	0.70827
316	308.4	0.70827	0.708261	0.708263	0.70827	0.708277	0.708279
315	308.5	0.708271	0.70827	0.708271	0.708275	0.708278	0.708279
314	308.6	0.708271	0.70827	0.708272	0.708275	0.708278	0.708279
313	308.7	0.708272	0.70827	0.708272	0.708275	0.708278	0.708279
312	308.8	0.708273	0.70827	0.708272	0.708275	0.708278	0.708279
311	308.9	0.708273	0.70827	0.708272	0.708275	0.708278	0.708279
310	309	0.708274	0.70827	0.708272	0.708275	0.708278	0.708279
309	309.1	0.708275	0.70827	0.708272	0.708275	0.708278	0.708279
308	309.2	0.708276	0.70827	0.708272	0.708275	0.708278	0.708279
307	309.3	0.708277	0.70827	0.708272	0.708275	0.708278	0.708279
306	309.4	0.708278	0.70827	0.708272	0.708275	0.708278	0.708279
305	309.5	0.708279	0.708271	0.708272	0.708275	0.708279	0.70828
304	309.6	0.70828	0.708271	0.708272	0.708277	0.708285	0.708288
303	309.7	0.708281	0.708273	0.70828	0.708284	0.708288	0.708289
302	309.8	0.708282	0.70828	0.708282	0.708285	0.708288	0.708289
301	309.9	0.708283	0.70828	0.708282	0.708285	0.708288	0.708289
300	310	0.708284	0.70828	0.708282	0.708285	0.708288	0.708289
299	310.1	0.708285	0.70828	0.708282	0.708285	0.708288	0.708289
298	310.2	0.708286	0.70828	0.708282	0.708285	0.708288	0.708289
297	310.3	0.708288	0.708281	0.708282	0.708285	0.708288	0.70829
296	310.4	0.708289	0.708281	0.708282	0.708286	0.70829	0.708296
295	310.5	0.70829	0.708281	0.708284	0.708291	0.708297	0.708299
294	310.6	0.708291	0.708285	0.708291	0.708294	0.708298	0.708299
293	310.7	0.708293	0.70829	0.708291	0.708295	0.708298	0.708299
292	310.8	0.708294	0.70829	0.708292	0.708295	0.708298	0.708299
291	310.9	0.708295	0.70829	0.708292	0.708295	0.708298	0.708299
290	311	0.708297	0.708291	0.708292	0.708295	0.708298	0.7083
289	311.1	0.708298	0.708291	0.708292	0.708296	0.7083	0.708306
288	311.2	0.7083	0.708291	0.708293	0.708299	0.708306	0.708309
287	311.3	0.708301	0.708292	0.708297	0.708304	0.708308	0.708309
286	311.4	0.708303	0.7083	0.708301	0.708305	0.708308	0.708309
285	311.5	0.708304	0.7083	0.708302	0.708305	0.708308	0.708309
284	311.6	0.708306	0.7083	0.708302	0.708305	0.708308	0.70831
283	311.7	0.708307	0.708301	0.708302	0.708305	0.708309	0.708311
282	311.8	0.708308	0.708301	0.708302	0.708307	0.708313	0.708318
281	311.9	0.70831	0.708301	0.708303	0.70831	0.708317	0.708319
280	312	0.708311	0.708302	0.708307	0.708314	0.708318	0.708319
279	312.1	0.708313	0.708308	0.708311	0.708315	0.708318	0.708319
278	312.2	0.708314	0.70831	0.708311	0.708315	0.708318	0.70832
277	312.3	0.708316	0.70831	0.708312	0.708315	0.708319	0.70832
276	312.4	0.708317	0.708311	0.708312	0.708316	0.70832	0.708326
275	312.5	0.708319	0.708311	0.708312	0.708317	0.708325	0.708328
274	312.6	0.70832	0.708311	0.708313	0.708321	0.708327	0.708329
273	312.7	0.708322	0.708312	0.708317	0.708323	0.708328	0.708329
272	312.8	0.708323	0.708314	0.708321	0.708324	0.708328	0.708329
271	312.9	0.708324	0.70832	0.708321	0.708325	0.708328	0.70833
270	313	0.708326	0.70832	0.708322	0.708325	0.708329	0.708332
269	313.1	0.708327	0.708321	0.708322	0.708326	0.70833	0.708337
268	313.2	0.708328	0.708321	0.708322	0.708327	0.708335	0.708338
267	313.3	0.708329	0.708321	0.708323	0.708329	0.708336	0.708339
266	313.4	0.708331	0.708321	0.708324	0.708332	0.708337	0.708339
265	313.5	0.708332	0.708322	0.708326	0.708333	0.708338	0.708339
264	313.6	0.708333	0.708323	0.70833	0.708334	0.708338	0.70834
263	313.7	0.708334	0.708325	0.708331	0.708335	0.708339	0.70834
262	313.8	0.708335	0.708328	0.708331	0.708335	0.708339	0.708344
261	313.9	0.708336	0.70833	0.708332	0.708336	0.70834	0.708347
260	314	0.708337	0.70833	0.708332	0.708336	0.708343	0.708348
259	314.1	0.708338	0.708331	0.708332	0.708337	0.708345	0.708348
258	314.2	0.708339	0.708331	0.708332	0.708338	0.708346	0.708349
257	314.3	0.708339	0.708331	0.708333	0.708339	0.708346	0.708349
256	314.4	0.70834	0.708331	0.708333	0.708341	0.708347	0.708349
255	314.5	0.708341	0.708331	0.708334	0.708342	0.708347	0.708349
254	314.6	0.708341	0.708331	0.708334	0.708342	0.708348	0.708349
253	314.7	0.708342	0.708332	0.708335	0.708343	0.708348	0.70835
252	314.8	0.708342	0.708332	0.708336	0.708343	0.708348	0.70835
251	314.9	0.708343	0.708332	0.708337	0.708344	0.708349	0.708351
250	315	0.708343	0.708332	0.708337	0.708344	0.708349	0.708352
249	315.1	0.708343	0.708332	0.708337	0.708344	0.708349	0.708354
248	315.2	0.708343	0.708332	0.708337	0.708344	0.708349	0.708354
247	315.3	0.708343	0.708332	0.708337	0.708344	0.708349	0.708355
246	315.4	0.708343	0.708332	0.708337	0.708344	0.708349	0.708355
245	315.5	0.708343	0.708332	0.708336	0.708344	0.708349	0.708355
244	315.6	0.708343	0.708332	0.708336	0.708344	0.708349	0.708355
243	315.7	0.708342	0.708331	0.708335	0.708343	0.708349	0.708354
242	315.8	0.708342	0.708331	0.708335	0.708343	0.708349	0.708353
241	315.9	0.708341	0.708331	0.708334	0.708342	0.708348	0.708352
240	316	0.708341	0.708331	0.708333	0.708341	0.708348	0.708351
239	316.1	0.70834	0.70833	0.708333	0.70834	0.708348	0.70835
238	316.2	0.708339	0.70833	0.708332	0.708339	0.708347	0.70835
237	316.3	0.708338	0.708328	0.708332	0.708338	0.708346	0.708349
236	316.4	0.708337	0.708325	0.708331	0.708337	0.708346	0.708349
235	316.5	0.708336	0.708324	0.70833	0.708336	0.708344	0.708349
234	316.6	0.708335	0.708322	0.708328	0.708335	0.708343	0.708348
233	316.7	0.708333	0.708321	0.708326	0.708334	0.708341	0.708347
232	316.8	0.708332	0.708321	0.708324	0.708333	0.708339	0.708346
231	316.9	0.70833	0.70832	0.708323	0.708331	0.708338	0.708345
230	317	0.708329	0.708316	0.708322	0.708329	0.708337	0.70834
229	317.1	0.708327	0.708314	0.708321	0.708327	0.708336	0.708339
228	317.2	0.708325	0.708312	0.708317	0.708325	0.708334	0.708339
227	317.3	0.708323	0.708311	0.708314	0.708323	0.708331	0.708337
226	317.4	0.708321	0.70831	0.708313	0.708321	0.708329	0.708336
225	317.5	0.708318	0.708305	0.708311	0.708318	0.708327	0.708333
224	317.6	0.708316	0.708302	0.708309	0.708316	0.708325	0.708329
223	317.7	0.708314	0.708301	0.708305	0.708314	0.708322	0.708328
222	317.8	0.708311	0.708299	0.708303	0.708311	0.708319	0.708327
221	317.9	0.708308	0.708294	0.708301	0.708308	0.708318	0.708324
220	318	0.708305	0.708292	0.708297	0.708306	0.708315	0.708319
219	318.1	0.708302	0.70829	0.708293	0.708303	0.708311	0.708318
218	318.2	0.708299	0.708284	0.708291	0.708299	0.708309	0.708316
217	318.3	0.708296	0.708282	0.708287	0.708296	0.708306	0.70831
216	318.4	0.708293	0.70828	0.708283	0.708293	0.708302	0.708308
215	318.5	0.708289	0.708274	0.708281	0.708289	0.708299	0.708306
214	318.6	0.708286	0.708271	0.708276	0.708286	0.708296	0.7083
213	318.7	0.708282	0.708268	0.708273	0.708282	0.708291	0.708298
212	318.8	0.708278	0.708263	0.70827	0.708278	0.708288	0.708296
211	318.9	0.708274	0.70826	0.708264	0.708275	0.708285	0.70829
210	319	0.70827	0.708254	0.708261	0.70827	0.70828	0.708288
209	319.1	0.708266	0.708251	0.708256	0.708266	0.708277	0.708283
208	319.2	0.708262	0.708246	0.708252	0.708262	0.708272	0.708279
207	319.3	0.708257	0.708242	0.708248	0.708257	0.708268	0.708276
206	319.4	0.708253	0.708237	0.708243	0.708253	0.708264	0.708269
205	319.5	0.708248	0.708232	0.708239	0.708248	0.708259	0.708267
204	319.6	0.708243	0.708228	0.708233	0.708244	0.708255	0.70826
203	319.7	0.708239	0.708222	0.70823	0.708238	0.708249	0.708257
202	319.8	0.708234	0.708217	0.708223	0.708234	0.708245	0.708251
201	319.9	0.708229	0.708212	0.708219	0.708228	0.708239	0.708247
200	320	0.708224	0.708206	0.708213	0.708224	0.708235	0.708242
199	320.1	0.708218	0.708202	0.708209	0.708218	0.708229	0.708237
198	320.2	0.708213	0.708196	0.708203	0.708213	0.708225	0.708231
197	320.3	0.708208	0.708191	0.708197	0.708208	0.708219	0.708227
196	320.4	0.708202	0.708184	0.708192	0.708202	0.708214	0.70822
195	320.5	0.708196	0.70818	0.708185	0.708196	0.708208	0.708216
194	320.6	0.708191	0.708173	0.708181	0.708191	0.708203	0.70821
193	320.7	0.708185	0.708167	0.708174	0.708185	0.708197	0.708205
192	320.8	0.708179	0.708162	0.708169	0.708179	0.708191	0.708199
191	320.9	0.708173	0.708154	0.708162	0.708173	0.708185	0.708193
190	321	0.708167	0.70815	0.708156	0.708167	0.708179	0.708188
189	321.1	0.708161	0.708143	0.70815	0.708161	0.708174	0.70818
188	321.2	0.708155	0.708136	0.708143	0.708155	0.708167	0.708176
187	321.3	0.708149	0.708131	0.708137	0.708148	0.708161	0.708169
186	321.4	0.708142	0.708123	0.708131	0.708143	0.708155	0.708163
185	321.5	0.708136	0.708117	0.708124	0.708136	0.708148	0.708157
184	321.6	0.708129	0.708111	0.708118	0.708129	0.708142	0.70815
183	321.7	0.708123	0.708103	0.708111	0.708123	0.708136	0.708144
182	321.8	0.708116	0.708097	0.708104	0.708116	0.708129	0.708137
181	321.9	0.70811	0.708091	0.708098	0.708109	0.708123	0.70813
180	322	0.708103	0.708083	0.708091	0.708103	0.708116	0.708125
179	322.1	0.708096	0.708077	0.708084	0.708096	0.708109	0.708118
178	322.2	0.70809	0.708071	0.708078	0.708089	0.708103	0.70811
177	322.3	0.708083	0.708063	0.708071	0.708083	0.708096	0.708104
176	322.4	0.708076	0.708056	0.708064	0.708076	0.708089	0.708098
175	322.5	0.708069	0.70805	0.708057	0.708069	0.708082	0.70809
174	322.6	0.708062	0.708042	0.70805	0.708062	0.708076	0.708084
173	322.7	0.708055	0.708035	0.708043	0.708055	0.708068	0.708077
172	322.8	0.708048	0.708029	0.708036	0.708048	0.708062	0.708069
171	322.9	0.708041	0.708022	0.708029	0.708042	0.708055	0.708063
170	323	0.708034	0.708014	0.708022	0.708035	0.708048	0.708057
169	323.1	0.708027	0.708007	0.708015	0.708027	0.708041	0.708049
168	323.2	0.708021	0.708	0.708008	0.708021	0.708034	0.708043
167	323.3	0.708014	0.707993	0.708001	0.708014	0.708027	0.708036
166	323.4	0.708007	0.707986	0.707994	0.708006	0.70802	0.708029
165	323.5	0.708	0.70798	0.707987	0.708	0.708013	0.708021
164	323.6	0.707993	0.707972	0.70798	0.707993	0.708006	0.708016
163	323.7	0.707986	0.707965	0.707973	0.707986	0.707999	0.708008
162	323.8	0.707979	0.707958	0.707966	0.707979	0.707992	0.708
161	323.9	0.707972	0.707952	0.70796	0.707972	0.707986	0.707995
160	324	0.707965	0.707944	0.707952	0.707965	0.707978	0.707988
159	324.1	0.707958	0.707937	0.707945	0.707958	0.707972	0.707979
158	324.2	0.707951	0.707931	0.707939	0.707952	0.707965	0.707975
157	324.3	0.707945	0.707923	0.707932	0.707945	0.707958	0.707968
156	324.4	0.707938	0.707917	0.707925	0.707938	0.707951	0.707959
155	324.5	0.707931	0.707911	0.707919	0.707932	0.707945	0.707954
154	324.6	0.707925	0.707904	0.707912	0.707925	0.707938	0.707948
153	324.7	0.707918	0.707898	0.707905	0.707918	0.707932	0.707939
152	324.8	0.707912	0.707891	0.707899	0.707912	0.707925	0.707934
151	324.9	0.707905	0.707884	0.707893	0.707905	0.707919	0.707928
150	325	0.707899	0.707879	0.707886	0.707899	0.707913	0.70792
149	325.1	0.707893	0.707872	0.707881	0.707893	0.707906	0.707915
148	325.2	0.707887	0.707865	0.707874	0.707886	0.7079	0.707909
147	325.3	0.707881	0.707861	0.707867	0.707881	0.707894	0.707902
146	325.4	0.707875	0.707853	0.707862	0.707875	0.707888	0.707897
145	325.5	0.707869	0.70785	0.707856	0.707869	0.707882	0.707889
144	325.6	0.707863	0.707842	0.707851	0.707863	0.707876	0.707885
143	325.7	0.707857	0.707837	0.707844	0.707857	0.70787	0.707879
142	325.8	0.707851	0.707832	0.70784	0.707852	0.707865	0.707873
141	325.9	0.707846	0.707825	0.707833	0.707846	0.707859	0.707868
140	326	0.707841	0.707821	0.707828	0.707841	0.707854	0.707861
139	326.1	0.707835	0.707815	0.707823	0.707835	0.707848	0.707857
138	326.2	0.70783	0.707811	0.707817	0.70783	0.707843	0.70785
137	326.3	0.707825	0.707805	0.707813	0.707825	0.707838	0.707847
136	326.4	0.70782	0.707801	0.707808	0.70782	0.707833	0.70784
135	326.5	0.707815	0.707795	0.707803	0.707815	0.707828	0.707837
134	326.6	0.707811	0.707792	0.707799	0.707811	0.707824	0.70783
133	326.7	0.707806	0.707788	0.707794	0.707806	0.707819	0.707827
132	326.8	0.707802	0.707782	0.70779	0.707802	0.707815	0.707822
131	326.9	0.707798	0.70778	0.707785	0.707798	0.707809	0.707818
130	327	0.707794	0.707774	0.707782	0.707794	0.707806	0.707814
129	327.1	0.70779	0.707771	0.707778	0.70779	0.707802	0.707809
128	327.2	0.707786	0.707769	0.707775	0.707786	0.707798	0.707807
127	327.3	0.707783	0.707764	0.707772	0.707783	0.707795	0.707802
126	327.4	0.707779	0.707761	0.707767	0.707779	0.707791	0.707799
125	327.5	0.707776	0.707759	0.707765	0.707776	0.707788	0.707796
124	327.6	0.707773	0.707754	0.707762	0.707773	0.707785	0.707791
123	327.7	0.70777	0.707752	0.707759	0.70777	0.707782	0.707789
122	327.8	0.707768	0.707751	0.707756	0.707767	0.707779	0.707787
121	327.9	0.707765	0.707749	0.707754	0.707765	0.707776	0.707783
120	328	0.707763	0.707745	0.707752	0.707763	0.707774	0.70778
119	328.1	0.707761	0.707743	0.70775	0.707761	0.707771	0.707779
118	328.2	0.707759	0.707742	0.707748	0.707758	0.707769	0.707777
117	328.3	0.707757	0.707741	0.707746	0.707757	0.707768	0.707775
116	328.4	0.707755	0.70774	0.707745	0.707756	0.707766	0.707773
115	328.5	0.707754	0.707739	0.707744	0.707754	0.707765	0.70777
114	328.6	0.707753	0.707737	0.707743	0.707753	0.707764	0.70777
113	328.7	0.707752	0.707736	0.707742	0.707752	0.707762	0.707769
112	328.8	0.707751	0.707735	0.707742	0.707752	0.707761	0.707768
111	328.9	0.707751	0.707735	0.707742	0.707751	0.70776	0.707768
110	329	0.707751	0.707735	0.707742	0.707751	0.70776	0.707767
109	329.1	0.707751	0.707735	0.707742	0.707751	0.707759	0.707767
108	329.2	0.707751	0.707736	0.707742	0.707751	0.707759	0.707767
107	329.3	0.707751	0.707736	0.707742	0.707752	0.707759	0.707767
106	329.4	0.707752	0.707738	0.707743	0.707752	0.70776	0.707767
105	329.5	0.707753	0.70774	0.707744	0.707753	0.707761	0.707768
104	329.6	0.707754	0.707741	0.707745	0.707754	0.707763	0.707768
103	329.7	0.707755	0.707742	0.707746	0.707755	0.707764	0.707769
102	329.8	0.707757	0.707742	0.707749	0.707756	0.707766	0.70777
101	329.9	0.707758	0.707744	0.707751	0.707758	0.707767	0.707771
100	330	0.707761	0.707749	0.707752	0.707761	0.707768	0.707774
99	330.1	0.707763	0.707751	0.707754	0.707763	0.70777	0.707777
98	330.2	0.707765	0.707752	0.707758	0.707765	0.707773	0.707778
97	330.3	0.707768	0.707755	0.707761	0.707768	0.707776	0.70778
96	330.4	0.707771	0.70776	0.707763	0.707771	0.707778	0.707783
95	330.5	0.707774	0.707762	0.707766	0.707774	0.70778	0.707787
94	330.6	0.707778	0.707766	0.707771	0.707777	0.707786	0.707789
93	330.7	0.707781	0.707771	0.707774	0.707782	0.707788	0.707791
92	330.8	0.707785	0.707773	0.70778	0.707785	0.707791	0.707798
91	330.9	0.707789	0.70778	0.707783	0.707789	0.707797	0.707799
90	331	0.707794	0.707782	0.707787	0.707794	0.707799	0.707805
89	331.1	0.707799	0.70779	0.707792	0.707798	0.707806	0.707809
88	331.2	0.707804	0.707792	0.707797	0.707804	0.707809	0.707813
87	331.3	0.707809	0.7078	0.707802	0.707808	0.707816	0.707819
86	331.4	0.707814	0.707803	0.70781	0.707814	0.707819	0.707823
85	331.5	0.70782	0.707811	0.707813	0.70782	0.707827	0.707829
84	331.6	0.707826	0.707817	0.707821	0.707825	0.70783	0.707836
83	331.7	0.707832	0.707822	0.707825	0.707833	0.707838	0.707839
82	331.8	0.707838	0.707831	0.707832	0.707837	0.707845	0.707849
81	331.9	0.707845	0.707837	0.707841	0.707845	0.707849	0.707853
80	332	0.707852	0.707842	0.707845	0.707853	0.707858	0.707859
79	332.1	0.707859	0.707851	0.707853	0.707858	0.707866	0.707869
78	332.2	0.707867	0.70786	0.707862	0.707866	0.70787	0.707876
77	332.3	0.707874	0.707865	0.707871	0.707875	0.707878	0.70788
76	332.4	0.707882	0.707872	0.707876	0.707883	0.707888	0.707889
75	332.5	0.70789	0.707881	0.707883	0.70789	0.707897	0.707899
74	332.6	0.707899	0.707891	0.707892	0.707897	0.707905	0.707908
73	332.7	0.707907	0.707901	0.707902	0.707906	0.707912	0.707917
72	332.8	0.707916	0.70791	0.707911	0.707916	0.70792	0.707926
71	332.9	0.707925	0.707918	0.707921	0.707925	0.707929	0.707933
70	333	0.707935	0.707925	0.707931	0.707935	0.707939	0.707941
69	333.1	0.707944	0.707934	0.70794	0.707944	0.707949	0.70795
68	333.2	0.707954	0.707943	0.70795	0.707954	0.707959	0.70796
67	333.3	0.707964	0.707953	0.707959	0.707964	0.707969	0.707972
66	333.4	0.707974	0.707963	0.70797	0.707974	0.707979	0.707984
65	333.5	0.707985	0.707974	0.70798	0.707985	0.707989	0.707995
64	333.6	0.707995	0.707984	0.707991	0.707995	0.708	0.708007
63	333.7	0.708006	0.707995	0.708001	0.708006	0.708013	0.708018
62	333.8	0.708018	0.708007	0.708011	0.708017	0.708025	0.708029
61	333.9	0.708029	0.70802	0.708022	0.708028	0.708036	0.708039
60	334	0.708041	0.70803	0.708033	0.708041	0.708048	0.70805
59	334.1	0.708052	0.708041	0.708044	0.708053	0.708059	0.708065
58	334.2	0.708064	0.708052	0.708057	0.708065	0.708071	0.708077
57	334.3	0.708077	0.708063	0.70807	0.708076	0.708085	0.708089
56	334.4	0.708089	0.708076	0.708082	0.708089	0.708097	0.708101
55	334.5	0.708102	0.70809	0.708093	0.708102	0.708109	0.708116
54	334.6	0.708115	0.708101	0.708106	0.708115	0.708123	0.708128
53	334.7	0.708128	0.708113	0.70812	0.708127	0.708137	0.708141
52	334.8	0.708141	0.708126	0.708132	0.708141	0.708149	0.708156
51	334.9	0.708154	0.70814	0.708145	0.708155	0.708164	0.708169
50	335	0.708168	0.708152	0.708159	0.708168	0.708178	0.708184
49	335.1	0.708182	0.708166	0.708172	0.708182	0.708191	0.708198
48	335.2	0.708196	0.70818	0.708186	0.708196	0.708206	0.708211
47	335.3	0.70821	0.708192	0.7082	0.70821	0.70822	0.708227
46	335.4	0.708225	0.708207	0.708214	0.708224	0.708235	0.708241
45	335.5	0.708239	0.708221	0.708228	0.708239	0.708249	0.708257
44	335.6	0.708254	0.708235	0.708243	0.708254	0.708265	0.708272
43	335.7	0.708269	0.70825	0.708257	0.708268	0.708279	0.708287
42	335.8	0.708284	0.708263	0.708272	0.708284	0.708295	0.708303
41	335.9	0.708299	0.70828	0.708286	0.708299	0.70831	0.708319
40	336	0.708314	0.708293	0.708302	0.708314	0.708327	0.708335
39	336.1	0.70833	0.70831	0.708317	0.70833	0.708342	0.70835
38	336.2	0.708345	0.708323	0.708333	0.708345	0.708358	0.708367
37	336.3	0.708361	0.70834	0.708348	0.708361	0.708374	0.708383
36	336.4	0.708377	0.708354	0.708363	0.708377	0.70839	0.708399
35	336.5	0.708393	0.708371	0.70838	0.708393	0.708407	0.708416
34	336.6	0.708409	0.708385	0.708395	0.708409	0.708423	0.708432
33	336.7	0.708425	0.708402	0.708411	0.708425	0.708439	0.708449
32	336.8	0.708442	0.708417	0.708427	0.708442	0.708457	0.708467
31	336.9	0.708458	0.708433	0.708443	0.708458	0.708474	0.708483
30	337	0.708475	0.70845	0.70846	0.708475	0.70849	0.7085
29	337.1	0.708492	0.708465	0.708476	0.708492	0.708508	0.708518
28	337.2	0.708509	0.708482	0.708493	0.708509	0.708525	0.708535
27	337.3	0.708526	0.708499	0.70851	0.708526	0.708541	0.708552
26	337.4	0.708543	0.708514	0.708525	0.708543	0.708559	0.708569
25	337.5	0.70856	0.708532	0.708543	0.70856	0.708577	0.708588
24	337.6	0.708577	0.708548	0.70856	0.708577	0.708594	0.708606
23	337.7	0.708594	0.708564	0.708576	0.708594	0.708612	0.708623
22	337.8	0.708611	0.708582	0.708594	0.708612	0.70863	0.70864
21	337.9	0.708629	0.708598	0.708611	0.708629	0.708647	0.708658
20	338	0.708646	0.708615	0.708628	0.708646	0.708665	0.708677
19	338.1	0.708664	0.708632	0.708645	0.708664	0.708683	0.708695
18	338.2	0.708682	0.70865	0.708662	0.708682	0.708701	0.708712
17	338.3	0.708699	0.708667	0.70868	0.708699	0.708719	0.70873
16	338.4	0.708717	0.708683	0.708697	0.708717	0.708737	0.708749
15	338.5	0.708735	0.708701	0.708715	0.708735	0.708755	0.708768
14	338.6	0.708752	0.708718	0.708732	0.708752	0.708774	0.708786
13	338.7	0.70877	0.708736	0.70875	0.70877	0.708791	0.708805
12	338.8	0.708788	0.708752	0.708767	0.708788	0.70881	0.708821
11	338.9	0.708806	0.70877	0.708785	0.708806	0.708828	0.708839
10	339	0.708823	0.708787	0.708802	0.708824	0.708846	0.708859
9	339.1	0.708841	0.708805	0.70882	0.708841	0.708864	0.708878
8	339.2	0.708859	0.708821	0.708837	0.708859	0.708883	0.708897
7	339.3	0.708877	0.708839	0.708855	0.708877	0.708901	0.708915
6	339.4	0.708895	0.708856	0.708872	0.708895	0.708919	0.708931
5	339.5	0.708913	0.708874	0.70889	0.708913	0.708937	0.708949
4	339.6	0.70893	0.708891	0.708907	0.70893	0.708955	0.708969
3	339.7	0.708948	0.708908	0.708925	0.708948	0.708974	0.708988
2	339.8	0.708966	0.708925	0.708942	0.708966	0.708991	0.709006
1	339.9	0.708984	0.708943	0.70896	0.708984	0.709009	0.709024
0	340	0.709001	0.708959	0.708977	0.709002	0.709027	0.709041

[truncated: 2 more sheets: d18O, d13C]
