# Supplementary material for: Rapid rise in atmospheric CO2 marked the end of the Late Palaeozoic Ice Age
Source: Nat Geosci. 2025 Jan 6;18(1):91–7. doi: 10.1038/s41561-024-01610-2 (PMC11732749; doi:10.1038/s41561-024-01610-2)
Supplement: Supplementary file 5 — Interpolated records (including pH and CO2) at 100 kyr resolution, second (temperature) scenario. [file 41561_2024_1610_MOESM5_ESM.xlsx]

## Sheet: description
Supplementary Data to Jurikova et al. 'Rapid rise in atmospheric CO2 marked the end of the Late Palaeozoic Ice Age'
Data S4	Interpolated records (including pH, CO2) at 100 kyr resolution, second scenario (assuming SST increase of ~9 °C from Late Carboniferous to Early Permian)
	All interpolations provided with mean values and 5, 16, 50, 84, and 95 % confidence intervals
tab	description
d11B4	d11B borate (‰), calibrated using new brachiopod calibration, see Supplementary Information
d11Bm	d11B measured = d11B brachiopod (‰)
d11Bsw	d11B seawater (‰) reconstructed
pH	pH
CO2	CO2 (ppm)
dic	dissolved inorganic carbon (μmol/kg)
alkalinity	alkalinity (μmol/kg)
saturation_state	calcite saturation state
strontium	87Sr/86Sr
d18O	d18O (‰)
d13C	d13C (‰)

## Sheet: d11B4
	age	mean	5	16	50	84	95
750	265	6.91778	6.50648	6.67224	6.92237	7.15583	7.28465
749	265.1	6.92897	6.53029	6.69294	6.9313	7.1598	7.28514
748	265.2	6.94126	6.55817	6.71061	6.94263	7.16359	7.28863
747	265.3	6.94927	6.57848	6.72458	6.9502	7.16322	7.28713
746	265.4	6.95893	6.60685	6.74098	6.95866	7.16527	7.28645
745	265.5	6.96768	6.62149	6.75197	6.96761	7.1675	7.29024
744	265.6	6.97353	6.6342	6.76824	6.97254	7.16682	7.28775
743	265.7	6.98176	6.64706	6.78128	6.98166	7.16911	7.2915
742	265.8	6.98668	6.65766	6.79194	6.98601	7.17285	7.28994
741	265.9	6.99282	6.67262	6.80249	6.99357	7.17505	7.28994
740	266	6.99672	6.67931	6.80615	6.99792	7.17746	7.29553
739	266.1	7.00047	6.68813	6.81063	7.00173	7.17649	7.29592
738	266.2	7.00385	6.69169	6.81501	7.00716	7.17919	7.29287
737	266.3	7.00719	6.69658	6.81672	7.01205	7.18168	7.29665
736	266.4	7.00688	6.69122	6.8157	7.01227	7.18123	7.29675
735	266.5	7.00919	6.69043	6.82031	7.01434	7.18405	7.29644
734	266.6	7.00792	6.6835	6.82033	7.01221	7.18304	7.29674
733	266.7	7.009	6.67712	6.82028	7.01236	7.1856	7.29798
732	266.8	7.00631	6.66854	6.81713	7.00893	7.18472	7.29774
731	266.9	7.00567	6.6659	6.81392	7.00692	7.18601	7.30138
730	267	7.00372	6.65854	6.81061	7.00454	7.18513	7.30777
729	267.1	7.00053	6.64821	6.80819	7.00156	7.1821	7.30947
728	267.2	6.99906	6.64861	6.80641	6.99784	7.18229	7.31569
727	267.3	6.99716	6.64011	6.80596	6.99468	7.18168	7.32065
726	267.4	6.99094	6.63158	6.79916	6.98907	7.1768	7.31254
725	267.5	6.98829	6.62603	6.79365	6.98618	7.17547	7.32165
724	267.6	6.98523	6.62192	6.78928	6.98396	7.17287	7.32138
723	267.7	6.9805	6.61663	6.78322	6.97763	7.17114	7.32452
722	267.8	6.97561	6.60799	6.77573	6.9728	7.16883	7.32654
721	267.9	6.96872	6.603	6.76453	6.96448	7.1625	7.32274
720	268	6.96333	6.59216	6.75498	6.95755	7.16063	7.33105
719	268.1	6.95682	6.58022	6.74775	6.95246	7.15428	7.32562
718	268.2	6.94974	6.5682	6.73904	6.94511	7.14947	7.32047
717	268.3	6.94777	6.56316	6.73589	6.94347	7.15076	7.32284
716	268.4	6.93836	6.55219	6.72677	6.93374	7.14254	7.31754
715	268.5	6.93309	6.53836	6.72114	6.93025	7.13898	7.31347
714	268.6	6.92722	6.53524	6.71353	6.92294	7.13666	7.31158
713	268.7	6.91796	6.52482	6.70428	6.91486	7.12769	7.30318
712	268.8	6.91143	6.516	6.69358	6.90646	7.12465	7.30241
711	268.9	6.90667	6.50791	6.68616	6.90057	7.12141	7.29888
710	269	6.8973	6.4973	6.669	6.89252	7.11434	7.29487
709	269.1	6.89256	6.49699	6.66225	6.88756	7.10805	7.28561
708	269.2	6.88576	6.48671	6.65097	6.8808	7.10423	7.28171
707	269.3	6.87766	6.47507	6.63561	6.87261	7.09968	7.27986
706	269.4	6.87429	6.47293	6.63181	6.86736	7.09942	7.27919
705	269.5	6.86663	6.45836	6.61741	6.86035	7.09706	7.275
704	269.6	6.85765	6.45065	6.60602	6.85189	7.09133	7.26623
703	269.7	6.85429	6.44537	6.60018	6.8494	7.09	7.26195
702	269.8	6.84607	6.43362	6.58719	6.84144	7.08619	7.25758
701	269.9	6.8409	6.42729	6.57759	6.83715	7.08494	7.25306
700	270	6.83738	6.42372	6.56869	6.8348	7.08326	7.24874
699	270.1	6.83252	6.41719	6.56175	6.83017	7.08259	7.24844
698	270.2	6.82681	6.41221	6.55308	6.82392	7.07972	7.2442
697	270.3	6.8215	6.40567	6.54723	6.81867	7.0754	7.2408
696	270.4	6.81767	6.39733	6.54094	6.81425	7.07588	7.24158
695	270.5	6.81181	6.38369	6.53138	6.81001	7.07387	7.23265
694	270.6	6.80985	6.37022	6.52657	6.80836	7.07722	7.23707
693	270.7	6.80556	6.36054	6.52002	6.80318	7.07602	7.23432
692	270.8	6.80231	6.34858	6.51124	6.80045	7.0773	7.23529
691	270.9	6.80006	6.34361	6.50576	6.80058	7.07792	7.23388
690	271	6.7964	6.33431	6.50127	6.79821	7.08045	7.23655
689	271.1	6.79433	6.32865	6.4941	6.79619	7.08328	7.23969
688	271.2	6.79142	6.31612	6.4863	6.79469	7.08367	7.23742
687	271.3	6.79032	6.31231	6.48214	6.79522	7.08641	7.24414
686	271.4	6.7876	6.30547	6.47628	6.79497	7.08822	7.24317
685	271.5	6.78864	6.30233	6.47332	6.79838	7.09205	7.24688
684	271.6	6.78645	6.29213	6.46737	6.79791	7.09342	7.24744
683	271.7	6.78779	6.27965	6.4657	6.79896	7.09989	7.25507
682	271.8	6.78907	6.27865	6.46481	6.80145	7.10468	7.26302
681	271.9	6.78835	6.26229	6.45799	6.80236	7.10822	7.26471
680	272	6.78789	6.25724	6.4548	6.80248	7.11078	7.2714
679	272.1	6.7897	6.25051	6.45372	6.80564	7.11436	7.27432
678	272.2	6.79235	6.24371	6.45226	6.80845	7.12051	7.28577
677	272.3	6.7935	6.23738	6.45033	6.80959	7.12513	7.29211
676	272.4	6.79637	6.23484	6.44803	6.8117	7.13146	7.2968
675	272.5	6.79689	6.23043	6.44452	6.81318	7.13519	7.30088
674	272.6	6.79987	6.22784	6.44544	6.81633	7.14157	7.31173
673	272.7	6.80172	6.22178	6.44284	6.81697	7.15	7.32437
672	272.8	6.80723	6.22516	6.44698	6.82209	7.1564	7.33062
671	272.9	6.80918	6.22132	6.44545	6.82243	7.16225	7.34065
670	273	6.81244	6.21982	6.44635	6.82578	7.17181	7.35108
669	273.1	6.81566	6.21864	6.44731	6.82795	7.17818	7.35649
668	273.2	6.82055	6.21667	6.44558	6.83286	7.18862	7.36434
667	273.3	6.82341	6.21737	6.44788	6.83315	7.19802	7.37132
666	273.4	6.82756	6.2174	6.45044	6.83825	7.20423	7.37416
665	273.5	6.82895	6.21574	6.45156	6.83727	7.20792	7.3823
664	273.6	6.83767	6.21716	6.45613	6.84525	7.22112	7.39583
663	273.7	6.84034	6.21843	6.45794	6.84809	7.22734	7.40033
662	273.8	6.84325	6.21515	6.46003	6.85069	7.23304	7.40978
661	273.9	6.84735	6.21829	6.46264	6.85293	7.23836	7.42479
660	274	6.85017	6.22073	6.46769	6.85514	7.24126	7.43208
659	274.1	6.85451	6.2245	6.47324	6.85683	7.24755	7.44231
658	274.2	6.85914	6.22606	6.47443	6.86187	7.25231	7.44951
657	274.3	6.86424	6.22888	6.48604	6.86354	7.25961	7.45991
656	274.4	6.86411	6.23067	6.48752	6.8623	7.26246	7.46127
655	274.5	6.87002	6.23209	6.49216	6.86776	7.26748	7.46957
654	274.6	6.8733	6.24019	6.50115	6.86885	7.27191	7.47427
653	274.7	6.87463	6.24356	6.50239	6.86835	7.27066	7.47698
652	274.8	6.878	6.24903	6.50766	6.86772	7.27647	7.48288
651	274.9	6.87991	6.25222	6.51071	6.87054	7.27666	7.48661
650	275	6.8808	6.25223	6.51199	6.8688	7.27822	7.48845
649	275.1	6.88328	6.25864	6.52019	6.87042	7.27619	7.48799
648	275.2	6.88372	6.25953	6.52163	6.86789	7.27878	7.49059
647	275.3	6.88436	6.26583	6.52513	6.86873	7.27546	7.4895
646	275.4	6.88569	6.27191	6.52727	6.86837	7.27695	7.48852
645	275.5	6.88532	6.27895	6.53316	6.86685	7.27182	7.48568
644	275.6	6.88408	6.28024	6.53346	6.86381	7.26918	7.48644
643	275.7	6.88378	6.28659	6.53611	6.86288	7.26624	7.48416
642	275.8	6.88019	6.29241	6.53667	6.85747	7.26071	7.47936
641	275.9	6.87679	6.29552	6.53686	6.85433	7.25207	7.46881
640	276	6.8742	6.29868	6.53853	6.85172	7.24631	7.46031
639	276.1	6.87092	6.30353	6.5378	6.84656	7.24236	7.45365
638	276.2	6.86522	6.30414	6.53496	6.84155	7.2316	7.44439
637	276.3	6.86059	6.30721	6.53469	6.83582	7.22236	7.43314
636	276.4	6.85381	6.30792	6.53066	6.83084	7.21206	7.42104
635	276.5	6.85066	6.3125	6.53097	6.82765	7.20335	7.40373
634	276.6	6.84169	6.30688	6.52567	6.81953	7.19108	7.3927
633	276.7	6.83418	6.30838	6.52053	6.81235	7.17978	7.37773
632	276.8	6.82773	6.30732	6.51709	6.80684	7.16953	7.36587
631	276.9	6.81643	6.30572	6.51224	6.79892	7.15127	7.34109
630	277	6.8072	6.30508	6.50832	6.78897	7.13821	7.32673
629	277.1	6.79854	6.30609	6.50018	6.78278	7.12444	7.31036
628	277.2	6.78664	6.30213	6.49172	6.77201	7.10555	7.28651
627	277.3	6.774	6.30273	6.47644	6.76222	7.09063	7.27291
626	277.4	6.76302	6.29087	6.4698	6.75065	7.07515	7.25725
625	277.5	6.74961	6.2928	6.46154	6.73788	7.0514	7.23192
624	277.6	6.73396	6.28007	6.44773	6.72278	7.03046	7.20818
623	277.7	6.72008	6.27317	6.43853	6.7086	7.01176	7.18874
622	277.8	6.70681	6.26875	6.42955	6.69494	6.99049	7.16712
621	277.9	6.69047	6.26109	6.41907	6.67911	6.97087	7.14521
620	278	6.67382	6.24704	6.40892	6.6652	6.94839	7.115
619	278.1	6.65766	6.23726	6.39523	6.65083	6.9278	7.08866
618	278.2	6.64148	6.2292	6.38016	6.6339	6.90239	7.06843
617	278.3	6.62258	6.21921	6.36331	6.61401	6.88255	7.03805
616	278.4	6.60358	6.21063	6.34887	6.59465	6.86143	7.00657
615	278.5	6.5836	6.20249	6.33484	6.57591	6.83644	6.9807
614	278.6	6.56443	6.18282	6.31864	6.55872	6.8127	6.96008
613	278.7	6.54477	6.16687	6.30524	6.53863	6.78876	6.92627
612	278.8	6.52566	6.15136	6.28784	6.52028	6.76586	6.89664
611	278.9	6.50395	6.13293	6.26661	6.49921	6.74064	6.87462
610	279	6.48356	6.12529	6.25162	6.47824	6.71105	6.84778
609	279.1	6.46326	6.1122	6.23264	6.45962	6.69085	6.81963
608	279.2	6.44102	6.10194	6.21642	6.43707	6.66693	6.79239
607	279.3	6.41568	6.0728	6.19479	6.41399	6.63275	6.76571
606	279.4	6.39505	6.04868	6.17078	6.39357	6.60394	6.73972
605	279.5	6.37386	6.03408	6.15291	6.37199	6.5837	6.70636
604	279.6	6.35035	6.01909	6.13349	6.34841	6.55988	6.68617
603	279.7	6.32703	6.00563	6.1179	6.32574	6.52772	6.65983
602	279.8	6.30352	5.97882	6.09641	6.30455	6.49646	6.62379
601	279.9	6.27997	5.95324	6.06986	6.27908	6.47487	6.59293
600	280	6.25776	5.93344	6.04947	6.25678	6.45105	6.57739
599	280.1	6.23267	5.91537	6.03074	6.231	6.4209	6.5501
598	280.2	6.21207	5.90267	6.0123	6.21232	6.39624	6.52022
597	280.3	6.18778	5.87566	5.99	6.18764	6.37163	6.48987
596	280.4	6.16462	5.84972	5.96471	6.16276	6.34696	6.46919
595	280.5	6.13962	5.82796	5.94337	6.13781	6.31546	6.44183
594	280.6	6.11887	5.81289	5.92797	6.11775	6.29163	6.41662
593	280.7	6.09505	5.79611	5.90741	6.09644	6.27021	6.38573
592	280.8	6.07061	5.76682	5.88068	6.06745	6.24639	6.36649
591	280.9	6.04934	5.74288	5.85937	6.04676	6.2193	6.34513
590	281	6.02644	5.72393	5.83837	6.02502	6.19195	6.31568
589	281.1	6.0045	5.70836	5.82042	6.00361	6.17338	6.28993
588	281.2	5.98156	5.68918	5.80087	5.97903	6.15331	6.26929
587	281.3	5.9609	5.65875	5.77488	5.95823	6.13077	6.25122
586	281.4	5.93853	5.63406	5.75213	5.93831	6.09943	6.22551
585	281.5	5.91713	5.61751	5.73347	5.91709	6.0829	6.19603
584	281.6	5.89624	5.60168	5.71451	5.89551	6.0665	6.17915
583	281.7	5.87603	5.57013	5.69415	5.87505	6.04734	6.16063
582	281.8	5.85543	5.54472	5.66934	5.85653	6.02453	6.13636
581	281.9	5.83518	5.52722	5.64759	5.83599	5.9999	6.10922
580	282	5.8172	5.51258	5.62905	5.81974	5.98643	6.09077
579	282.1	5.79683	5.48768	5.61124	5.79947	5.97114	6.07801
578	282.2	5.77879	5.45762	5.59017	5.78063	5.95547	6.06376
577	282.3	5.76094	5.43869	5.5664	5.76297	5.93767	6.04981
576	282.4	5.7426	5.42321	5.54811	5.748	5.91627	6.02216
575	282.5	5.72458	5.40666	5.52872	5.73028	5.89836	6.004
574	282.6	5.70808	5.38665	5.5106	5.7134	5.8869	5.99385
573	282.7	5.69056	5.35909	5.49337	5.69672	5.87158	5.98246
572	282.8	5.67491	5.3378	5.47358	5.67926	5.85875	5.97442
571	282.9	5.6601	5.32324	5.45583	5.66472	5.84511	5.96275
570	283	5.64231	5.30777	5.43559	5.64705	5.82931	5.94892
569	283.1	5.62941	5.29682	5.42177	5.63413	5.81817	5.93889
568	283.2	5.61461	5.26489	5.40806	5.62063	5.80051	5.92982
567	283.3	5.60126	5.24269	5.39488	5.60974	5.78827	5.91173
566	283.4	5.58789	5.22871	5.37793	5.59561	5.77959	5.90644
565	283.5	5.57637	5.21594	5.3626	5.58087	5.7724	5.89875
564	283.6	5.56358	5.20478	5.3464	5.56817	5.76121	5.89245
563	283.7	5.54987	5.18534	5.33272	5.55431	5.7505	5.88692
562	283.8	5.54146	5.16875	5.32305	5.54538	5.7451	5.88474
561	283.9	5.52871	5.15178	5.3122	5.53305	5.73054	5.87791
560	284	5.51926	5.13788	5.30203	5.5253	5.71983	5.87249
559	284.1	5.50963	5.12342	5.28647	5.51436	5.71193	5.86813
558	284.2	5.50033	5.11182	5.27432	5.50519	5.70198	5.86158
557	284.3	5.49214	5.10183	5.26251	5.49558	5.69911	5.85921
556	284.4	5.48343	5.08912	5.2522	5.48599	5.6924	5.85134
555	284.5	5.47639	5.07809	5.24463	5.47789	5.68953	5.84839
554	284.6	5.46784	5.06667	5.23563	5.47013	5.68323	5.84159
553	284.7	5.4618	5.06042	5.22861	5.46367	5.6797	5.83988
552	284.8	5.45667	5.04927	5.22252	5.45931	5.67586	5.83508
551	284.9	5.45216	5.0425	5.21685	5.45386	5.67313	5.83344
550	285	5.44632	5.03195	5.2122	5.44858	5.66792	5.82361
549	285.1	5.44286	5.02564	5.20726	5.44556	5.66633	5.824
548	285.2	5.43811	5.01901	5.20465	5.44113	5.66281	5.82
547	285.3	5.43564	5.01462	5.19827	5.4391	5.66159	5.82088
546	285.4	5.43302	5.01394	5.19802	5.43604	5.65868	5.81744
545	285.5	5.42958	5.00536	5.19192	5.43374	5.65616	5.81655
544	285.6	5.42813	5.0026	5.18889	5.43182	5.65465	5.81272
543	285.7	5.42904	4.99968	5.18993	5.43225	5.65708	5.81759
542	285.8	5.42981	5	5.19209	5.43184	5.65736	5.81951
541	285.9	5.42974	4.99843	5.1913	5.43157	5.65839	5.81954
540	286	5.43055	4.99969	5.19152	5.4319	5.65792	5.81782
539	286.1	5.4323	4.99783	5.19134	5.43367	5.66044	5.82006
538	286.2	5.43427	4.99969	5.19776	5.43584	5.66148	5.8212
537	286.3	5.43877	5.00551	5.20153	5.44066	5.66537	5.82233
536	286.4	5.44258	5.01045	5.20332	5.44624	5.66986	5.82439
535	286.5	5.4463	5.0084	5.20611	5.45148	5.6735	5.83132
534	286.6	5.45342	5.02054	5.21289	5.45647	5.68066	5.83514
533	286.7	5.46026	5.02692	5.21971	5.46406	5.68473	5.83889
532	286.8	5.4669	5.03431	5.22564	5.4705	5.69153	5.8441
531	286.9	5.47429	5.04481	5.23333	5.4778	5.69582	5.84578
530	287	5.48353	5.05241	5.24257	5.48683	5.70557	5.85328
529	287.1	5.49273	5.0596	5.25554	5.49629	5.71521	5.86125
528	287.2	5.50323	5.07287	5.2672	5.50828	5.72476	5.8694
527	287.3	5.51393	5.08726	5.28181	5.51922	5.73327	5.88042
526	287.4	5.52587	5.09916	5.29707	5.53108	5.74512	5.8871
525	287.5	5.53954	5.11648	5.31046	5.54463	5.75641	5.89572
524	287.6	5.55304	5.13222	5.32448	5.55868	5.76864	5.90417
523	287.7	5.56845	5.14853	5.34058	5.57497	5.77958	5.91703
522	287.8	5.58423	5.16422	5.35692	5.59137	5.79234	5.93243
521	287.9	5.60181	5.18698	5.38198	5.60916	5.80615	5.94556
520	288	5.62058	5.20992	5.40506	5.62695	5.82734	5.96123
519	288.1	5.63846	5.23169	5.42159	5.64446	5.8445	5.97646
518	288.2	5.65998	5.25267	5.44089	5.66663	5.86364	5.99159
517	288.3	5.68148	5.27769	5.46818	5.68903	5.88063	6.01064
516	288.4	5.70431	5.30991	5.50166	5.71337	5.89662	6.03163
515	288.5	5.72868	5.33373	5.52161	5.7355	5.92337	6.0541
514	288.6	5.75305	5.35991	5.54491	5.75847	5.94887	6.07368
513	288.7	5.77885	5.39856	5.57955	5.78629	5.97086	6.09093
512	288.8	5.80649	5.42404	5.6106	5.81491	5.99159	6.11658
511	288.9	5.83601	5.45864	5.6378	5.84185	6.01916	6.14628
510	289	5.86677	5.5	5.67787	5.8734	6.05231	6.17116
509	289.1	5.89868	5.53142	5.71141	5.9074	6.07816	6.19182
508	289.2	5.93168	5.57268	5.74112	5.93745	6.10311	6.22476
507	289.3	5.96422	5.61351	5.78466	5.96916	6.14164	6.25979
506	289.4	6.00098	5.64867	5.81994	6.00837	6.17457	6.28645
505	289.5	6.03826	5.69969	5.85732	6.04294	6.20282	6.31626
504	289.6	6.07639	5.73899	5.90568	6.08209	6.24687	6.36082
503	289.7	6.11781	5.7894	5.94138	6.12268	6.28265	6.39139
502	289.8	6.15865	5.83644	5.99764	6.16212	6.31913	6.42533
501	289.9	6.20162	5.88935	6.0322	6.20545	6.3647	6.47105
500	290	6.24703	5.9339	6.08659	6.25043	6.39789	6.5
499	290.1	6.2945	5.99531	6.12995	6.29673	6.45359	6.55598
498	290.2	6.34213	6.04836	6.19007	6.34349	6.49102	6.59233
497	290.3	6.39234	6.10679	6.23411	6.39268	6.54644	6.64516
496	290.4	6.44381	6.15805	6.29602	6.44362	6.59142	6.68812
495	290.5	6.4952	6.21771	6.34291	6.49441	6.64426	6.74107
494	290.6	6.55171	6.28739	6.40693	6.55016	6.69349	6.78786
493	290.7	6.60734	6.33877	6.46025	6.60572	6.75308	6.84878
492	290.8	6.66515	6.40705	6.52203	6.6626	6.80148	6.89171
491	290.9	6.72685	6.47707	6.5917	6.7255	6.86597	6.9596
490	291	6.78918	6.53278	6.64544	6.78572	6.92775	7.01263
489	291.1	6.85191	6.61085	6.71653	6.84883	6.9867	7.07612
488	291.2	6.91735	6.68	6.78383	6.91367	7.05261	7.14377
487	291.3	6.98363	6.74013	6.84245	6.97836	7.11588	7.19456
486	291.4	7.05294	6.81692	6.91914	7.04808	7.18468	7.27348
485	291.5	7.12257	6.89472	6.99482	7.11951	7.25532	7.34441
484	291.6	7.19615	6.96549	7.05949	7.18947	7.32917	7.39861
483	291.7	7.27004	7.03878	7.13286	7.26219	7.39895	7.48253
482	291.8	7.34517	7.11857	7.21306	7.3392	7.47607	7.56447
481	291.9	7.42338	7.20453	7.29681	7.41663	7.55688	7.64372
480	292	7.50238	7.27709	7.36622	7.49157	7.63802	7.71676
479	292.1	7.58411	7.3524	7.44335	7.57561	7.7177	7.79468
478	292.2	7.66791	7.43634	7.52654	7.66031	7.79922	7.88395
477	292.3	7.75097	7.52331	7.61362	7.74381	7.88357	7.97261
476	292.4	7.83656	7.61407	7.70215	7.82958	7.97083	8.062
475	292.5	7.9233	7.7055	7.78503	7.91673	8.05849	8.15
474	292.6	8.01395	7.79763	7.86901	8.00758	8.15092	8.23782
473	292.7	8.10385	7.87386	7.95376	8.09714	8.242	8.32611
472	292.8	8.19498	7.9585	8.04353	8.18844	8.33348	8.40575
471	292.9	8.28922	8.04583	8.13547	8.28381	8.42927	8.49955
470	293	8.3834	8.13926	8.22929	8.37809	8.52358	8.59725
469	293.1	8.47859	8.23121	8.32133	8.47464	8.61942	8.69518
468	293.2	8.57487	8.32534	8.41554	8.57171	8.71733	8.79388
467	293.3	8.67444	8.42196	8.51274	8.67182	8.81865	8.8952
466	293.4	8.77268	8.51711	8.60855	8.7694	8.91948	8.99738
465	293.5	8.87309	8.61557	8.70889	8.87002	9.02041	9.09893
464	293.6	8.97418	8.71103	8.80826	8.97086	9.12392	9.20611
463	293.7	9.07625	8.80852	8.9081	9.07282	9.22908	9.32162
462	293.8	9.17829	8.90487	9.00715	9.17522	9.33363	9.43184
461	293.9	9.28069	9.00111	9.10704	9.27793	9.43975	9.54517
460	294	9.38299	9.1006	9.20675	9.38005	9.54456	9.65359
459	294.1	9.48888	9.19512	9.30832	9.48661	9.65343	9.76918
458	294.2	9.59253	9.29512	9.41007	9.59058	9.75797	9.87311
457	294.3	9.69442	9.38818	9.5097	9.69396	9.86277	9.97836
456	294.4	9.79849	9.48471	9.6104	9.79741	9.96973	10.0876
455	294.5	9.90236	9.58482	9.71111	9.90057	10.0744	10.1933
454	294.6	10.008	9.68639	9.81355	10.0061	10.1844	10.3054
453	294.7	10.1124	9.78037	9.91349	10.1107	10.2916	10.4228
452	294.8	10.2122	9.87507	10.0113	10.2089	10.3942	10.5349
451	294.9	10.3161	9.96849	10.1104	10.3113	10.5041	10.6503
450	295	10.42	10.0657	10.211	10.4141	10.6158	10.7594
449	295.1	10.5191	10.1577	10.3063	10.5131	10.7209	10.8631
448	295.2	10.6196	10.2486	10.4047	10.6116	10.8276	10.9679
447	295.3	10.7194	10.3389	10.5004	10.7099	10.9348	11.0751
446	295.4	10.8155	10.4311	10.5913	10.8044	11.036	11.1767
445	295.5	10.9117	10.5206	10.677	10.9014	11.1391	11.2798
444	295.6	11.0101	10.6145	10.7709	10.9977	11.2443	11.3829
443	295.7	11.1027	10.7069	10.8608	11.0907	11.3403	11.4815
442	295.8	11.1942	10.7939	10.9475	11.1795	11.4391	11.5819
441	295.9	11.2844	10.8637	11.0343	11.2703	11.5359	11.6793
440	296	11.3758	10.9467	11.1186	11.3615	11.6343	11.782
439	296.1	11.4597	11.0287	11.2056	11.4455	11.721	11.8704
438	296.2	11.5439	11.1097	11.2793	11.5288	11.8116	11.9647
437	296.3	11.6257	11.1834	11.3576	11.6101	11.8948	12.0523
436	296.4	11.708	11.2553	11.4347	11.6902	11.9828	12.146
435	296.5	11.7868	11.3257	11.5125	11.7704	12.0669	12.2297
434	296.6	11.8615	11.396	11.5809	11.8461	12.145	12.3094
433	296.7	11.9356	11.4602	11.6489	11.919	12.2258	12.3917
432	296.8	12.007	11.5296	11.7184	11.9888	12.294	12.4697
431	296.9	12.0755	11.5979	11.7832	12.0586	12.3677	12.5467
430	297	12.1414	11.6555	11.843	12.1248	12.4378	12.6178
429	297.1	12.208	11.7213	11.9079	12.1889	12.5098	12.69
428	297.2	12.2664	11.7808	11.9615	12.248	12.5667	12.7555
427	297.3	12.3249	11.8345	12.0151	12.3052	12.6337	12.8215
426	297.4	12.3819	11.8886	12.0646	12.3648	12.691	12.8842
425	297.5	12.4356	11.9409	12.119	12.4159	12.7499	12.9419
424	297.6	12.4856	11.9935	12.1632	12.4676	12.7971	12.9918
423	297.7	12.5338	12.0383	12.2133	12.5162	12.8503	13.0451
422	297.8	12.5796	12.0833	12.2503	12.5626	12.8971	13.0951
421	297.9	12.6225	12.1266	12.293	12.6039	12.9455	13.1455
420	298	12.6622	12.1609	12.3297	12.647	12.9816	13.1817
419	298.1	12.6988	12.2046	12.3665	12.6798	13.0201	13.2297
418	298.2	12.7353	12.2361	12.4052	12.7184	13.0592	13.2659
417	298.3	12.7688	12.2661	12.4358	12.7517	13.088	13.2968
416	298.4	12.799	12.2997	12.4621	12.7822	13.1207	13.3337
415	298.5	12.8281	12.3292	12.4977	12.8109	13.1516	13.3665
414	298.6	12.8509	12.3501	12.5178	12.834	13.1726	13.3905
413	298.7	12.8774	12.3709	12.5419	12.8604	13.1977	13.4175
412	298.8	12.8962	12.3937	12.5587	12.8793	13.2176	13.4423
411	298.9	12.9162	12.4137	12.5812	12.8982	13.2377	13.4616
410	299	12.9319	12.4301	12.6011	12.9129	13.2537	13.4756
409	299.1	12.9501	12.4481	12.6195	12.9338	13.2684	13.4902
408	299.2	12.9626	12.4531	12.6282	12.9456	13.2826	13.5076
407	299.3	12.9724	12.4679	12.6402	12.9534	13.2914	13.5231
406	299.4	12.9818	12.4817	12.6525	12.9648	13.2942	13.5247
405	299.5	12.9889	12.4932	12.661	12.9727	13.2983	13.5279
404	299.6	12.9947	12.5007	12.6678	12.9765	13.3086	13.5405
403	299.7	12.9993	12.5071	12.6732	12.9834	13.3103	13.5383
402	299.8	13.0022	12.5039	12.6772	12.9866	13.3187	13.54
401	299.9	13.0054	12.5122	12.685	12.9898	13.3155	13.5392
400	300	13.0054	12.5096	12.6855	12.9911	13.3167	13.5386
399	300.1	13.0041	12.5077	12.6851	12.9901	13.3138	13.5363
398	300.2	12.9998	12.5066	12.6818	12.9879	13.3068	13.5256
397	300.3	12.9983	12.5038	12.6823	12.9845	13.3029	13.5186
396	300.4	12.9928	12.4994	12.6795	12.9819	13.2959	13.505
395	300.5	12.9898	12.5012	12.6755	12.9779	13.2909	13.4983
394	300.6	12.9812	12.4857	12.665	12.9712	13.2803	13.4865
393	300.7	12.9771	12.4821	12.6633	12.9687	13.275	13.4826
392	300.8	12.969	12.4758	12.655	12.9597	13.2671	13.4734
391	300.9	12.9614	12.4709	12.649	12.9519	13.2589	13.4669
390	301	12.9541	12.4624	12.6428	12.947	13.2507	13.4547
389	301.1	12.9432	12.4496	12.6313	12.9371	13.2401	13.4438
388	301.2	12.9358	12.4449	12.6263	12.9301	13.2284	13.432
387	301.3	12.9252	12.4329	12.6173	12.9172	13.2182	13.4206
386	301.4	12.9176	12.4248	12.611	12.9111	13.2092	13.4132
385	301.5	12.9075	12.4167	12.5999	12.901	13.198	13.3992
384	301.6	12.8952	12.4025	12.5829	12.8901	13.1884	13.3931
383	301.7	12.885	12.3908	12.5728	12.8787	13.1788	13.3872
382	301.8	12.8759	12.378	12.5617	12.8702	13.1724	13.3809
381	301.9	12.866	12.3623	12.5514	12.8601	13.1628	13.3724
380	302	12.8566	12.3524	12.5412	12.849	13.1518	13.3607
379	302.1	12.8468	12.347	12.5304	12.8362	13.1417	13.3494
378	302.2	12.8361	12.3311	12.5191	12.8269	13.1312	13.3444
377	302.3	12.8266	12.3213	12.5081	12.8181	13.1218	13.3389
376	302.4	12.8189	12.3118	12.5025	12.8086	13.1143	13.33
375	302.5	12.8075	12.3053	12.4873	12.7974	13.1028	13.3204
374	302.6	12.7993	12.2919	12.479	12.7901	13.0957	13.3105
373	302.7	12.791	12.2781	12.4675	12.7809	13.0897	13.3077
372	302.8	12.7844	12.2686	12.459	12.7765	13.0847	13.3013
371	302.9	12.7759	12.2584	12.4479	12.7685	13.0772	13.2966
370	303	12.7685	12.2489	12.4363	12.7625	13.0743	13.2947
369	303.1	12.7616	12.2421	12.429	12.7551	13.0671	13.289
368	303.2	12.7566	12.2375	12.422	12.7498	13.065	13.2852
367	303.3	12.7501	12.2277	12.4135	12.7441	13.0586	13.2818
366	303.4	12.747	12.2231	12.4063	12.7416	13.06	13.2779
365	303.5	12.7408	12.2152	12.3963	12.7359	13.0564	13.2765
364	303.6	12.7389	12.2098	12.3959	12.7328	13.0569	13.2756
363	303.7	12.7344	12.2035	12.3854	12.7306	13.0542	13.2735
362	303.8	12.7317	12.1984	12.3789	12.727	13.0532	13.2724
361	303.9	12.7299	12.192	12.3754	12.7262	13.0533	13.2746
360	304	12.7277	12.1846	12.3727	12.723	13.0541	13.2764
359	304.1	12.7283	12.1831	12.3741	12.7238	13.0557	13.2753
358	304.2	12.7272	12.1728	12.368	12.7235	13.059	13.2796
357	304.3	12.727	12.1666	12.366	12.7248	13.0624	13.282
356	304.4	12.7293	12.1687	12.3672	12.7272	13.0648	13.2862
355	304.5	12.7319	12.1638	12.3665	12.7292	13.0695	13.2924
354	304.6	12.7333	12.1657	12.3658	12.7295	13.0701	13.2953
353	304.7	12.7378	12.1657	12.3669	12.7346	13.0788	13.3049
352	304.8	12.7415	12.1694	12.3705	12.7391	13.0845	13.3099
351	304.9	12.7454	12.1709	12.3743	12.7438	13.0858	13.3198
350	305	12.7515	12.1739	12.3776	12.75	13.0964	13.3353
349	305.1	12.7552	12.1736	12.3801	12.7532	13.1025	13.3453
348	305.2	12.7639	12.1812	12.3879	12.7605	13.1174	13.3571
347	305.3	12.7711	12.1872	12.3943	12.7701	13.123	13.363
346	305.4	12.7782	12.1911	12.4007	12.7749	13.1373	13.3723
345	305.5	12.7856	12.1996	12.4028	12.7836	13.1456	13.381
344	305.6	12.7944	12.2056	12.4112	12.7914	13.1571	13.3907
343	305.7	12.8037	12.2087	12.4171	12.8024	13.1682	13.3988
342	305.8	12.8152	12.2171	12.4267	12.8121	13.1805	13.4221
341	305.9	12.826	12.2264	12.4363	12.8247	13.1918	13.432
340	306	12.8386	12.2355	12.4481	12.8352	13.2078	13.4483
339	306.1	12.8505	12.2446	12.4595	12.8483	13.2216	13.4576
338	306.2	12.8628	12.2548	12.4699	12.8598	13.236	13.4679
337	306.3	12.8757	12.2673	12.4821	12.8732	13.2519	13.4818
336	306.4	12.8891	12.2779	12.4962	12.8875	13.2649	13.4931
335	306.5	12.903	12.2938	12.5064	12.9047	13.2788	13.5128
334	306.6	12.9184	12.3081	12.5188	12.9197	13.2924	13.5269
333	306.7	12.9337	12.3181	12.5373	12.9344	13.3117	13.5426
332	306.8	12.9498	12.332	12.5508	12.9506	13.3276	13.5576
331	306.9	12.967	12.3416	12.5672	12.9695	13.3503	13.5712
330	307	12.9814	12.3588	12.584	12.9821	13.3619	13.5834
329	307.1	12.9994	12.3692	12.6042	13.0024	13.3772	13.5981
328	307.2	13.018	12.3966	12.6177	13.0189	13.3959	13.6241
327	307.3	13.0349	12.4088	12.6328	13.0373	13.4157	13.6368
326	307.4	13.0541	12.4241	12.6528	13.0565	13.4372	13.6524
325	307.5	13.0692	12.4348	12.6686	13.0704	13.4507	13.665
324	307.6	13.0913	12.4578	12.6953	13.092	13.4714	13.6837
323	307.7	13.1095	12.472	12.712	13.1119	13.488	13.6985
322	307.8	13.1326	12.5005	12.7337	13.133	13.5115	13.726
321	307.9	13.1515	12.5116	12.7555	13.1528	13.5318	13.7407
320	308	13.1722	12.5254	12.7779	13.1735	13.5551	13.7643
319	308.1	13.1931	12.5422	12.8039	13.1941	13.572	13.7831
318	308.2	13.2135	12.5658	12.8213	13.2141	13.5906	13.7955
317	308.3	13.233	12.5822	12.8412	13.2322	13.6116	13.8254
316	308.4	13.2539	12.6013	12.8645	13.2557	13.6348	13.8469
315	308.5	13.2751	12.6136	12.8866	13.2765	13.6543	13.8704
314	308.6	13.295	12.6301	12.9106	13.2981	13.6726	13.8876
313	308.7	13.3192	12.6568	12.9325	13.3216	13.6886	13.9102
312	308.8	13.3398	12.6784	12.9552	13.343	13.7126	13.9332
311	308.9	13.3621	12.6974	12.9764	13.3668	13.7382	13.9626
310	309	13.3857	12.7162	13.0009	13.3914	13.7618	13.9835
309	309.1	13.4054	12.7331	13.0205	13.4132	13.7795	13.9972
308	309.2	13.4298	12.7667	13.0414	13.4344	13.8027	14.0319
307	309.3	13.4512	12.7815	13.0643	13.4573	13.8248	14.0613
306	309.4	13.4727	12.8117	13.0895	13.4804	13.8459	14.0774
305	309.5	13.4945	12.8287	13.1106	13.5035	13.8695	14.1064
304	309.6	13.5175	12.8524	13.1315	13.5275	13.8915	14.1291
303	309.7	13.5394	12.8819	13.1558	13.5486	13.9103	14.1488
302	309.8	13.5624	12.9032	13.1783	13.5727	13.9389	14.1789
301	309.9	13.5809	12.9191	13.1969	13.5946	13.9574	14.1954
300	310	13.6037	12.9467	13.2222	13.6127	13.9776	14.2271
299	310.1	13.6246	12.9665	13.2406	13.6338	13.9959	14.2453
298	310.2	13.6462	12.9843	13.2614	13.6548	14.0196	14.262
297	310.3	13.6652	13.0012	13.2827	13.6719	14.0458	14.2852
296	310.4	13.6863	13.0263	13.3033	13.6925	14.0663	14.3081
295	310.5	13.7063	13.047	13.3183	13.7121	14.0868	14.3282
294	310.6	13.726	13.0592	13.333	13.7299	14.1089	14.3525
293	310.7	13.7465	13.0888	13.3543	13.7502	14.1323	14.369
292	310.8	13.7657	13.0965	13.3766	13.7664	14.1548	14.3916
291	310.9	13.7859	13.1132	13.3932	13.7873	14.178	14.4122
290	311	13.8011	13.1276	13.4054	13.8048	14.1942	14.4238
289	311.1	13.8197	13.1386	13.4202	13.8207	14.2182	14.4463
288	311.2	13.8371	13.1544	13.4379	13.8374	14.2373	14.4676
287	311.3	13.855	13.1654	13.4459	13.858	14.2601	14.4828
286	311.4	13.8722	13.1758	13.462	13.8734	14.2795	14.5013
285	311.5	13.8883	13.1917	13.4728	13.887	14.2956	14.5289
284	311.6	13.903	13.1987	13.4868	13.9002	14.3182	14.5485
283	311.7	13.9194	13.211	13.5011	13.9179	14.3371	14.571
282	311.8	13.9352	13.2264	13.5114	13.9348	14.3569	14.5843
281	311.9	13.9473	13.2314	13.515	13.9463	14.3708	14.6069
280	312	13.9597	13.2352	13.5241	13.9578	14.3869	14.627
279	312.1	13.9723	13.2477	13.5314	13.9715	14.4009	14.6458
278	312.2	13.9833	13.257	13.5404	13.9809	14.4173	14.6631
277	312.3	13.9955	13.2681	13.5483	13.9954	14.437	14.6793
276	312.4	14.0057	13.2694	13.5548	14.0067	14.4511	14.6935
275	312.5	14.0158	13.2798	13.56	14.016	14.4641	14.7153
274	312.6	14.0248	13.2884	13.5672	14.0228	14.4733	14.7376
273	312.7	14.0355	13.2916	13.5752	14.0328	14.484	14.7564
272	312.8	14.0413	13.2912	13.5785	14.038	14.4926	14.7734
271	312.9	14.0519	13.3003	13.5878	14.0495	14.5095	14.7867
270	313	14.0574	13.3043	13.588	14.0525	14.5154	14.8047
269	313.1	14.064	13.3052	13.5882	14.059	14.5294	14.8223
268	313.2	14.0668	13.3057	13.5867	14.0619	14.5361	14.8362
267	313.3	14.0721	13.3051	13.5888	14.0662	14.5435	14.85
266	313.4	14.0757	13.3015	13.5926	14.0691	14.5485	14.8592
265	313.5	14.0774	13.3	13.5898	14.0712	14.553	14.8674
264	313.6	14.0801	13.2929	13.5921	14.0743	14.5561	14.8774
263	313.7	14.0805	13.2935	13.5894	14.0755	14.5586	14.8861
262	313.8	14.0826	13.2885	13.5928	14.0763	14.5649	14.8927
261	313.9	14.0828	13.285	13.5929	14.0748	14.5653	14.8967
260	314	14.0799	13.2803	13.5886	14.0706	14.5643	14.8992
259	314.1	14.0772	13.2803	13.5872	14.0661	14.5665	14.8939
258	314.2	14.0754	13.2706	13.5833	14.0632	14.5669	14.8947
257	314.3	14.071	13.2642	13.5753	14.056	14.5658	14.9018
256	314.4	14.0659	13.2566	13.5682	14.0494	14.5608	14.9006
255	314.5	14.0638	13.2534	13.5628	14.0454	14.5641	14.9078
254	314.6	14.0549	13.2473	13.5552	14.0348	14.5555	14.8972
253	314.7	14.0494	13.2358	13.5456	14.0284	14.5541	14.8911
252	314.8	14.0439	13.2292	13.5402	14.02	14.5501	14.8926
251	314.9	14.035	13.2228	13.5322	14.0069	14.5446	14.8904
250	315	14.0277	13.2113	13.5219	14.001	14.5401	14.8845
249	315.1	14.0175	13.205	13.5117	13.9847	14.5324	14.8777
248	315.2	14.0098	13.2007	13.5012	13.9766	14.5272	14.876
247	315.3	13.9961	13.1918	13.4896	13.9619	14.5095	14.8563
246	315.4	13.9839	13.1728	13.4743	13.9478	14.4987	14.8494
245	315.5	13.9725	13.1624	13.4619	13.9344	14.489	14.8404
244	315.6	13.9606	13.1538	13.4511	13.9206	14.4765	14.8287
243	315.7	13.9468	13.1412	13.4353	13.9046	14.4641	14.8109
242	315.8	13.9332	13.1248	13.4229	13.8916	14.4508	14.7937
241	315.9	13.9197	13.1156	13.4111	13.8778	14.4379	14.784
240	316	13.9015	13.0975	13.3941	13.8609	14.4183	14.7723
239	316.1	13.8889	13.0873	13.3786	13.8498	14.4052	14.767
238	316.2	13.8715	13.0749	13.3633	13.8328	14.3821	14.7452
237	316.3	13.8546	13.0516	13.3454	13.8157	14.3691	14.731
236	316.4	13.8381	13.0331	13.3284	13.7983	14.3518	14.7187
235	316.5	13.8218	13.0165	13.3135	13.7856	14.3343	14.7012
234	316.6	13.8038	13.0085	13.2948	13.7652	14.3129	14.6847
233	316.7	13.7839	12.9813	13.2716	13.748	14.2941	14.6667
232	316.8	13.7658	12.9638	13.2549	13.7318	14.2757	14.643
231	316.9	13.748	12.9456	13.2392	13.7161	14.2575	14.625
230	317	13.7274	12.9234	13.2164	13.695	14.2385	14.6026
229	317.1	13.7072	12.9093	13.199	13.6753	14.2124	14.5843
228	317.2	13.6867	12.8875	13.1765	13.6578	14.1883	14.5668
227	317.3	13.6655	12.8688	13.1535	13.6382	14.1704	14.5436
226	317.4	13.6475	12.8437	13.1349	13.6189	14.152	14.5204
225	317.5	13.6271	12.8252	13.1125	13.6015	14.1299	14.5
224	317.6	13.6059	12.8046	13.0935	13.5809	14.11	14.4803
223	317.7	13.5823	12.7841	13.0712	13.5594	14.0826	14.4565
222	317.8	13.563	12.7586	13.049	13.5416	14.0651	14.4359
221	317.9	13.5411	12.7395	13.0256	13.521	14.0432	14.4065
220	318	13.5188	12.7217	13.0029	13.4976	14.0207	14.3826
219	318.1	13.4986	12.6971	12.9811	13.4783	13.9994	14.3624
218	318.2	13.4788	12.6763	12.9611	13.4593	13.983	14.338
217	318.3	13.4561	12.654	12.9375	13.4372	13.9618	14.3067
216	318.4	13.433	12.6347	12.9138	13.4155	13.9406	14.2826
215	318.5	13.413	12.6126	12.8908	13.3952	13.9222	14.2623
214	318.6	13.3911	12.5902	12.8674	13.3707	13.897	14.2422
213	318.7	13.3698	12.567	12.8457	13.3498	13.8802	14.2176
212	318.8	13.3443	12.5449	12.8213	13.3249	13.858	14.1875
211	318.9	13.3263	12.5257	12.8024	13.3068	13.8392	14.1688
210	319	13.3047	12.5048	12.7738	13.2843	13.8247	14.1545
209	319.1	13.2847	12.4818	12.7544	13.2644	13.805	14.1371
208	319.2	13.2649	12.4573	12.734	13.2471	13.7851	14.1219
207	319.3	13.2441	12.4362	12.7113	13.2257	13.767	14.1047
206	319.4	13.2229	12.4123	12.6863	13.2062	13.748	14.0865
205	319.5	13.202	12.3915	12.664	13.1862	13.727	14.0652
204	319.6	13.1827	12.3665	12.6434	13.1662	13.7078	14.0487
203	319.7	13.1638	12.3408	12.6198	13.1486	13.6902	14.0347
202	319.8	13.1437	12.3204	12.5992	13.1268	13.6763	14.018
201	319.9	13.1252	12.3012	12.5738	13.1082	13.6587	14.0021
200	320	13.1051	12.267	12.5521	13.0887	13.6419	13.9881
199	320.1	13.0872	12.2402	12.5348	13.073	13.6236	13.9814
198	320.2	13.0709	12.2196	12.5129	13.0568	13.61	13.9681
197	320.3	13.0503	12.1933	12.4871	13.0364	13.5928	13.9579
196	320.4	13.0329	12.1615	12.4641	13.0192	13.5802	13.9535
195	320.5	13.0163	12.1372	12.4424	13.0032	13.566	13.9429
194	320.6	12.9991	12.1176	12.4255	12.9858	13.5546	13.9363
193	320.7	12.9826	12.0843	12.402	12.9711	13.5432	13.9305
192	320.8	12.9669	12.0597	12.3773	12.9555	13.5277	13.9224
191	320.9	12.9507	12.0355	12.3547	12.9393	13.5182	13.9224
190	321	12.9371	12.0109	12.3348	12.9269	13.5128	13.9188
189	321.1	12.924	11.989	12.3135	12.9154	13.5009	13.9113
188	321.2	12.9066	11.9592	12.2911	12.8953	13.4899	13.9064
187	321.3	12.8942	11.9344	12.2685	12.883	13.4824	13.9021
186	321.4	12.881	11.9104	12.245	12.8717	13.4782	13.9028
185	321.5	12.8704	11.8871	12.2271	12.8603	13.4747	13.9062
184	321.6	12.857	11.8635	12.2056	12.8442	13.4701	13.9079
183	321.7	12.8438	11.8418	12.1853	12.8307	13.4632	13.9047
182	321.8	12.8324	11.8143	12.1665	12.8176	13.4607	13.9043
181	321.9	12.8225	11.79	12.1468	12.8116	13.4586	13.906
180	322	12.8113	11.7689	12.1297	12.799	13.4568	13.9174
179	322.1	12.8011	11.7482	12.1077	12.7863	13.4537	13.9159
178	322.2	12.7908	11.7296	12.0907	12.7759	13.4551	13.9188
177	322.3	12.782	11.7023	12.0729	12.7661	13.4538	13.9293
176	322.4	12.7734	11.6886	12.0586	12.7564	13.455	13.9341
175	322.5	12.7649	11.6658	12.0438	12.7449	13.458	13.9398
174	322.6	12.7575	11.6455	12.0237	12.7399	13.458	13.9493
173	322.7	12.7494	11.627	12.0036	12.731	13.4577	13.9635
172	322.8	12.7427	11.6137	11.9924	12.7236	13.4623	13.9628
171	322.9	12.735	11.5949	11.9788	12.7113	13.4653	13.9737
170	323	12.7289	11.575	11.9652	12.7064	13.465	13.9764
169	323.1	12.725	11.5636	11.9491	12.699	13.4731	13.992
168	323.2	12.7181	11.544	11.9337	12.6933	13.4744	13.997
167	323.3	12.7129	11.5293	11.9171	12.6863	13.4801	14.0071
166	323.4	12.7098	11.5185	11.9087	12.6837	13.485	14.0192
165	323.5	12.706	11.5	11.8963	12.6812	13.4939	14.0373
164	323.6	12.7007	11.4927	11.8854	12.6732	13.5016	14.041
163	323.7	12.6949	11.4732	11.8718	12.668	13.5012	14.0485
162	323.8	12.6946	11.4564	11.862	12.6682	13.5183	14.0639
161	323.9	12.6913	11.4419	11.8536	12.6647	13.5238	14.0764
160	324	12.6899	11.4304	11.8447	12.6643	13.5279	14.0886
159	324.1	12.6883	11.4151	11.8362	12.6612	13.5362	14.0981
158	324.2	12.6834	11.4107	11.83	12.6543	13.5399	14.1073
157	324.3	12.6844	11.4032	11.825	12.6531	13.5496	14.1192
156	324.4	12.683	11.3859	11.8188	12.6482	13.5517	14.1255
155	324.5	12.6814	11.3776	11.8112	12.6466	13.5573	14.1351
154	324.6	12.6841	11.3735	11.8139	12.6469	13.5669	14.1495
153	324.7	12.6816	11.3623	11.8042	12.6409	13.569	14.1509
152	324.8	12.6839	11.3519	11.8044	12.644	13.5741	14.1605
151	324.9	12.6851	11.3463	11.8071	12.639	13.5809	14.1667
150	325	12.6865	11.3425	11.8069	12.6386	13.588	14.1826
149	325.1	12.6868	11.3357	11.8041	12.6385	13.5888	14.1826
148	325.2	12.6875	11.3305	11.8031	12.6387	13.5913	14.1842
147	325.3	12.6901	11.3301	11.8078	12.6379	13.5991	14.1903
146	325.4	12.6907	11.3286	11.8098	12.6378	13.6018	14.1969
145	325.5	12.6966	11.3253	11.8134	12.6416	13.6116	14.2102
144	325.6	12.6968	11.3264	11.8154	12.6425	13.6088	14.1984
143	325.7	12.6984	11.3239	11.8185	12.6374	13.6202	14.2019
142	325.8	12.7041	11.3257	11.8271	12.6429	13.6215	14.2151
141	325.9	12.7081	11.3264	11.8272	12.6462	13.6275	14.2162
140	326	12.7115	11.3279	11.8317	12.6478	13.6293	14.2184
139	326.1	12.7152	11.332	11.838	12.6495	13.6304	14.224
138	326.2	12.7206	11.3385	11.8481	12.6552	13.633	14.2291
137	326.3	12.7241	11.3382	11.8544	12.6567	13.6377	14.2277
136	326.4	12.7294	11.3527	11.8641	12.6608	13.6452	14.2243
135	326.5	12.7306	11.3535	11.8715	12.6614	13.6419	14.2228
134	326.6	12.7404	11.3652	11.8805	12.668	13.6504	14.2233
133	326.7	12.7448	11.3705	11.8925	12.671	13.6534	14.2193
132	326.8	12.7496	11.38	11.9046	12.6724	13.6529	14.2176
131	326.9	12.7568	11.3873	11.9137	12.6787	13.6568	14.2135
130	327	12.764	11.4044	11.9257	12.6866	13.6563	14.2036
129	327.1	12.7709	11.4159	11.9365	12.6925	13.6567	14.1954
128	327.2	12.7775	11.4328	11.9488	12.6989	13.6617	14.1903
127	327.3	12.7843	11.4458	11.9675	12.7037	13.6603	14.1843
126	327.4	12.7905	11.4634	11.9806	12.7114	13.6581	14.1742
125	327.5	12.7984	11.4799	11.9972	12.7176	13.6536	14.1735
124	327.6	12.8074	11.4901	12.0109	12.727	13.6592	14.1598
123	327.7	12.8151	11.5131	12.0281	12.738	13.6597	14.1545
122	327.8	12.8238	11.537	12.0461	12.7496	13.6577	14.1414
121	327.9	12.8312	11.5591	12.0642	12.7571	13.6546	14.1374
120	328	12.8447	11.5846	12.0953	12.775	13.6537	14.1222
119	328.1	12.8519	11.6071	12.1074	12.7867	13.6507	14.1111
118	328.2	12.862	11.6346	12.1234	12.7991	13.6525	14.103
117	328.3	12.8713	11.6638	12.1436	12.8117	13.6514	14.095
116	328.4	12.885	11.6956	12.1759	12.8249	13.6509	14.0906
115	328.5	12.8937	11.7158	12.1895	12.8387	13.6506	14.0802
114	328.6	12.9041	11.7473	12.2119	12.8498	13.6499	14.0703
113	328.7	12.9177	11.7869	12.2395	12.8611	13.6542	14.0646
112	328.8	12.9323	11.816	12.2654	12.8813	13.651	14.0525
111	328.9	12.9435	11.8464	12.2892	12.8958	13.649	14.0406
110	329	12.9567	11.8893	12.3182	12.9108	13.646	14.0345
109	329.1	12.9725	11.9222	12.3409	12.9283	13.6455	14.0322
108	329.2	12.9869	11.9619	12.3756	12.9449	13.6446	14.019
107	329.3	13.0004	12.001	12.4057	12.9602	13.6446	14.0138
106	329.4	13.016	12.0418	12.4316	12.9806	13.6376	13.9985
105	329.5	13.034	12.0803	12.4601	12.9987	13.6455	13.9961
104	329.6	13.0465	12.1186	12.4932	13.012	13.6394	13.9855
103	329.7	13.0614	12.162	12.5236	13.0307	13.6285	13.9725
102	329.8	13.0822	12.2068	12.5576	13.0537	13.6311	13.9703
101	329.9	13.0977	12.2495	12.5906	13.0739	13.6249	13.9631
100	330	13.1176	12.2979	12.6264	13.0942	13.6272	13.9568
99	330.1	13.1341	12.3433	12.6557	13.1106	13.6241	13.9534
98	330.2	13.1545	12.395	12.6883	13.1322	13.6275	13.948
97	330.3	13.1729	12.4348	12.7215	13.1559	13.6268	13.9454
96	330.4	13.195	12.4931	12.7546	13.1774	13.6355	13.9439
95	330.5	13.2159	12.5358	12.7906	13.1985	13.6344	13.9403
94	330.6	13.238	12.5921	12.8291	13.2227	13.6395	13.94
93	330.7	13.2619	12.6374	12.8621	13.2477	13.6488	13.9432
92	330.8	13.2845	12.6934	12.9004	13.2691	13.6522	13.9358
91	330.9	13.3075	12.7362	12.9371	13.2921	13.6596	13.9349
90	331	13.3327	12.7909	12.9739	13.3161	13.6715	13.9382
89	331.1	13.3553	12.8281	13.0149	13.3391	13.6779	13.9369
88	331.2	13.3837	12.8756	13.0543	13.3667	13.6902	13.9471
87	331.3	13.408	12.916	13.0933	13.3897	13.7014	13.9489
86	331.4	13.4347	12.9599	13.1342	13.4181	13.7196	13.9584
85	331.5	13.4629	12.9981	13.1691	13.4448	13.7425	13.969
84	331.6	13.4924	13.038	13.2107	13.4753	13.7635	13.9775
83	331.7	13.5188	13.0747	13.2372	13.4999	13.7882	13.987
82	331.8	13.551	13.1104	13.275	13.5352	13.8217	14.0008
81	331.9	13.5811	13.1374	13.3107	13.5663	13.8501	14.0261
80	332	13.6106	13.1615	13.337	13.5986	13.881	14.0551
79	332.1	13.6441	13.2033	13.3672	13.634	13.9208	14.0856
78	332.2	13.6773	13.2181	13.4008	13.6664	13.9567	14.1232
77	332.3	13.7102	13.2363	13.4264	13.7008	13.993	14.1642
76	332.4	13.7435	13.257	13.4541	13.7367	14.0311	14.198
75	332.5	13.7781	13.2707	13.4793	13.7674	14.0768	14.262
74	332.6	13.8156	13.2869	13.5133	13.807	14.1269	14.3075
73	332.7	13.8507	13.3044	13.5382	13.8416	14.1669	14.3619
72	332.8	13.8869	13.3109	13.5661	13.8759	14.2156	14.4244
71	332.9	13.9284	13.3253	13.5983	13.9167	14.2723	14.4901
70	333	13.9642	13.3333	13.6192	13.9557	14.3192	14.5603
69	333.1	14.006	13.3422	13.6429	13.9968	14.3775	14.6277
68	333.2	14.0458	13.3542	13.6681	14.0398	14.4332	14.6987
67	333.3	14.0869	13.3654	13.6978	14.0837	14.4881	14.7663
66	333.4	14.1291	13.3767	13.7142	14.127	14.5526	14.8496
65	333.5	14.1731	13.3857	13.7346	14.1729	14.6132	14.9258
64	333.6	14.2149	13.4047	13.7568	14.2157	14.6716	14.9996
63	333.7	14.2624	13.4198	13.7818	14.2624	14.7356	15.0822
62	333.8	14.3062	13.4256	13.8035	14.308	14.7988	15.1597
61	333.9	14.3544	13.4339	13.8251	14.3562	14.8683	15.2465
60	334	14.4014	13.459	13.8507	14.4011	14.937	15.3307
59	334.1	14.4465	13.4771	13.8723	14.447	14.9956	15.4107
58	334.2	14.4956	13.4842	13.9012	14.4944	15.0683	15.4944
57	334.3	14.5459	13.5024	13.923	14.5453	15.1423	15.5861
56	334.4	14.597	13.525	13.9479	14.6015	15.211	15.6636
55	334.5	14.6471	13.5432	13.9738	14.6484	15.2827	15.7509
54	334.6	14.699	13.5693	14.0052	14.703	15.356	15.8403
53	334.7	14.7539	13.586	14.032	14.7565	15.4362	15.9268
52	334.8	14.8059	13.6086	14.059	14.8134	15.5056	16.0078
51	334.9	14.8617	13.6244	14.0872	14.8689	15.5884	16.0956
50	335	14.9156	13.646	14.1163	14.9247	15.6692	16.1836
49	335.1	14.97	13.6706	14.1403	14.9789	15.7482	16.2729
48	335.2	15.0266	13.6947	14.1725	15.0386	15.8301	16.3568
47	335.3	15.0833	13.7136	14.2026	15.0992	15.9153	16.4452
46	335.4	15.141	13.7451	14.2303	15.1557	15.9926	16.5364
45	335.5	15.2033	13.7695	14.2633	15.2198	16.0833	16.6331
44	335.6	15.2617	13.8053	14.2948	15.2805	16.1691	16.7187
43	335.7	15.3209	13.8303	14.3263	15.3399	16.2485	16.807
42	335.8	15.3841	13.8587	14.3581	15.4101	16.3358	16.9
41	335.9	15.4467	13.8983	14.3984	15.4703	16.4192	16.9969
40	336	15.5071	13.9283	14.4275	15.5316	16.5066	17.0872
39	336.1	15.5718	13.9607	14.4636	15.599	16.5925	17.1814
38	336.2	15.6372	13.9959	14.501	15.6663	16.6768	17.2667
37	336.3	15.7009	14.0283	14.5375	15.7294	16.7629	17.3582
36	336.4	15.765	14.0643	14.5781	15.7995	16.8489	17.4495
35	336.5	15.8303	14.0949	14.6104	15.8652	16.9371	17.548
34	336.6	15.8951	14.1263	14.6514	15.9339	17.0245	17.6474
33	336.7	15.9653	14.1636	14.7008	16.0036	17.1158	17.7348
32	336.8	16.0311	14.1972	14.7422	16.0705	17.2024	17.8333
31	336.9	16.1009	14.241	14.7839	16.1445	17.2935	17.9434
30	337	16.17	14.2783	14.8298	16.2158	17.387	18.0352
29	337.1	16.2374	14.3099	14.8628	16.2885	17.4753	18.1327
28	337.2	16.3104	14.3478	14.9164	16.3614	17.57	18.2327
27	337.3	16.3779	14.3815	14.9568	16.4321	17.6563	18.3354
26	337.4	16.4506	14.4172	15.0048	16.5122	17.7496	18.433
25	337.5	16.52	14.4551	15.0521	16.5779	17.8389	18.5418
24	337.6	16.5924	14.492	15.094	16.6552	17.9325	18.6403
23	337.7	16.6638	14.526	15.1465	16.7289	18.0235	18.7381
22	337.8	16.7384	14.568	15.1957	16.8047	18.114	18.8407
21	337.9	16.8091	14.5973	15.247	16.8819	18.207	18.9415
20	338	16.8805	14.637	15.2965	16.9562	18.3004	19.037
19	338.1	16.9578	14.6922	15.3544	17.0377	18.3955	19.1402
18	338.2	17.0313	14.7245	15.4061	17.1138	18.4863	19.2394
17	338.3	17.1048	14.768	15.456	17.1926	18.5724	19.3313
16	338.4	17.1807	14.8122	15.5091	17.2658	18.6673	19.4313
15	338.5	17.2537	14.8455	15.5574	17.3449	18.7601	19.5341
14	338.6	17.3282	14.8917	15.6197	17.4217	18.8488	19.6377
13	338.7	17.4032	14.9304	15.6648	17.5013	18.9452	19.7321
12	338.8	17.4785	14.9835	15.7239	17.5798	19.0363	19.8312
11	338.9	17.5528	15.0172	15.7706	17.652	19.1256	19.9405
10	339	17.6278	15.0582	15.828	17.7263	19.2235	20.0485
9	339.1	17.7042	15.1016	15.8772	17.8103	19.3133	20.1516
8	339.2	17.7809	15.1479	15.9346	17.887	19.4183	20.25
7	339.3	17.8553	15.1835	15.9862	17.9584	19.5082	20.3571
6	339.4	17.9256	15.2234	16.036	18.0318	19.6026	20.4452
5	339.5	18.0068	15.2789	16.0923	18.1116	19.7032	20.5557
4	339.6	18.0822	15.3313	16.157	18.1904	19.7972	20.6648
3	339.7	18.1572	15.3689	16.2076	18.2627	19.8927	20.7655
2	339.8	18.2318	15.4107	16.2536	18.3383	19.9858	20.8704
1	339.9	18.3098	15.4607	16.3152	18.4167	20.079	20.9685
0	340	18.3819	15.5048	16.3628	18.492	20.1658	21.0684

## Sheet: d11Bm
	age	mean	5	16	50	84	95
750	265	10.4446	10.1216	10.2499	10.4455	10.6293	10.7369
749	265.1	10.4532	10.1401	10.2666	10.452	10.6325	10.7377
748	265.2	10.4627	10.1625	10.2834	10.4614	10.6342	10.7404
747	265.3	10.4689	10.1786	10.2968	10.4673	10.6347	10.739
746	265.4	10.4763	10.2033	10.3088	10.4741	10.6364	10.7367
745	265.5	10.483	10.2137	10.3161	10.4818	10.6402	10.7396
744	265.6	10.4876	10.2224	10.3257	10.4854	10.6393	10.7356
743	265.7	10.494	10.2313	10.3354	10.4924	10.6431	10.7405
742	265.8	10.4978	10.2369	10.3407	10.4963	10.6448	10.7392
741	265.9	10.5025	10.2441	10.3479	10.5028	10.6469	10.7392
740	266	10.5056	10.2478	10.3506	10.5054	10.6493	10.7445
739	266.1	10.5084	10.2574	10.3559	10.5086	10.6495	10.7469
738	266.2	10.5111	10.2595	10.3598	10.5127	10.6516	10.7458
737	266.3	10.5137	10.2608	10.3617	10.5164	10.6539	10.7483
736	266.4	10.5135	10.2585	10.3607	10.517	10.6546	10.7509
735	266.5	10.5152	10.2568	10.3614	10.5187	10.6563	10.7515
734	266.6	10.5143	10.2553	10.3601	10.5175	10.6554	10.7508
733	266.7	10.5151	10.2523	10.361	10.5175	10.6573	10.7536
732	266.8	10.513	10.2477	10.3591	10.5146	10.657	10.7544
731	266.9	10.5125	10.2452	10.3585	10.5127	10.6567	10.7561
730	267	10.511	10.2375	10.3576	10.5118	10.6558	10.7567
729	267.1	10.5085	10.2314	10.3542	10.5094	10.6526	10.7555
728	267.2	10.5074	10.2291	10.3527	10.5067	10.6532	10.761
727	267.3	10.5059	10.2237	10.3507	10.5045	10.6529	10.7627
726	267.4	10.5011	10.2198	10.3444	10.4994	10.6474	10.7608
725	267.5	10.499	10.2161	10.341	10.4969	10.6468	10.7636
724	267.6	10.4967	10.2139	10.3371	10.4953	10.6435	10.764
723	267.7	10.493	10.2103	10.3331	10.4898	10.6407	10.7663
722	267.8	10.4892	10.2039	10.3275	10.4857	10.6389	10.7677
721	267.9	10.4839	10.2007	10.3224	10.4796	10.6334	10.7635
720	268	10.4798	10.1919	10.3176	10.4735	10.6334	10.7685
719	268.1	10.4746	10.1814	10.3144	10.4685	10.6252	10.7619
718	268.2	10.4693	10.1714	10.3088	10.4621	10.6233	10.76
717	268.3	10.4676	10.1672	10.3065	10.4612	10.6231	10.7612
716	268.4	10.4604	10.1572	10.3001	10.4534	10.6149	10.7541
715	268.5	10.4563	10.1464	10.2915	10.4499	10.6128	10.7523
714	268.6	10.4518	10.1443	10.2825	10.4446	10.612	10.7529
713	268.7	10.4446	10.1361	10.2705	10.4387	10.6034	10.7455
712	268.8	10.4397	10.1297	10.2623	10.4328	10.6005	10.7448
711	268.9	10.4359	10.1236	10.2564	10.428	10.5992	10.7442
710	269	10.4287	10.1131	10.2462	10.4225	10.5948	10.7389
709	269.1	10.425	10.1127	10.2406	10.4191	10.5925	10.7312
708	269.2	10.4198	10.1068	10.2337	10.4143	10.5911	10.7283
707	269.3	10.4134	10.1041	10.2239	10.4091	10.5884	10.7262
706	269.4	10.4109	10.102	10.221	10.4056	10.5879	10.7235
705	269.5	10.4049	10.0909	10.2105	10.4002	10.5857	10.7186
704	269.6	10.3979	10.0873	10.2022	10.3929	10.58	10.7098
703	269.7	10.3953	10.0813	10.1982	10.3907	10.5787	10.7055
702	269.8	10.389	10.0708	10.1872	10.3838	10.5755	10.6996
701	269.9	10.385	10.0625	10.1789	10.3795	10.5744	10.6977
700	270	10.3823	10.0551	10.1725	10.3775	10.575	10.6949
699	270.1	10.3785	10.0461	10.1666	10.3733	10.5735	10.6937
698	270.2	10.3741	10.0389	10.1604	10.3698	10.5716	10.6923
697	270.3	10.37	10.035	10.1558	10.3666	10.569	10.6905
696	270.4	10.367	10.0282	10.1492	10.3651	10.5696	10.6901
695	270.5	10.3626	10.0242	10.1435	10.3603	10.5673	10.6854
694	270.6	10.361	10.0186	10.1389	10.3593	10.5696	10.6877
693	270.7	10.3578	10.0137	10.1338	10.3571	10.5681	10.6859
692	270.8	10.3552	10.0061	10.1284	10.3547	10.5705	10.6851
691	270.9	10.3534	10.0035	10.1251	10.3539	10.5705	10.6857
690	271	10.3506	9.99386	10.1192	10.3509	10.571	10.6867
689	271.1	10.349	9.98892	10.115	10.3494	10.5724	10.6886
688	271.2	10.3468	9.97067	10.1097	10.3489	10.574	10.6883
687	271.3	10.3459	9.9674	10.1066	10.3485	10.5754	10.69
686	271.4	10.3439	9.95809	10.1033	10.3465	10.5763	10.6903
685	271.5	10.3446	9.95233	10.1002	10.3482	10.5793	10.6935
684	271.6	10.3429	9.94731	10.0953	10.347	10.5808	10.6955
683	271.7	10.344	9.9427	10.0937	10.3486	10.5844	10.6984
682	271.8	10.345	9.94051	10.0917	10.3497	10.5874	10.703
681	271.9	10.3444	9.9304	10.0873	10.3511	10.591	10.7085
680	272	10.3441	9.92704	10.0841	10.3515	10.593	10.7161
679	272.1	10.3455	9.92425	10.0856	10.3542	10.5937	10.7187
678	272.2	10.3474	9.92062	10.0814	10.3568	10.5984	10.7292
677	272.3	10.3484	9.91788	10.0803	10.3569	10.6011	10.7372
676	272.4	10.3505	9.916	10.0781	10.3597	10.607	10.7441
675	272.5	10.351	9.91302	10.0761	10.3595	10.609	10.7488
674	272.6	10.3534	9.91103	10.0757	10.3627	10.6145	10.7548
673	272.7	10.3548	9.90777	10.0734	10.3638	10.6233	10.7599
672	272.8	10.3589	9.90763	10.0773	10.3689	10.6295	10.7651
671	272.9	10.3605	9.90661	10.0761	10.3695	10.6349	10.7708
670	273	10.363	9.9039	10.0757	10.3719	10.6419	10.7774
669	273.1	10.3655	9.90465	10.079	10.374	10.6463	10.7806
668	273.2	10.3693	9.90324	10.0764	10.3779	10.6535	10.7856
667	273.3	10.3715	9.90344	10.0778	10.378	10.6597	10.7911
666	273.4	10.3747	9.90476	10.0796	10.3811	10.6635	10.7929
665	273.5	10.3759	9.901	10.0826	10.3815	10.6666	10.7984
664	273.6	10.3825	9.90417	10.0865	10.3881	10.6781	10.8187
663	273.7	10.3846	9.90326	10.0907	10.3899	10.6822	10.8268
662	273.8	10.3869	9.90361	10.0917	10.3917	10.6877	10.8319
661	273.9	10.39	9.90212	10.0941	10.3934	10.692	10.8415
660	274	10.3922	9.90366	10.0979	10.3954	10.6947	10.8474
659	274.1	10.3956	9.90769	10.1027	10.3963	10.7	10.8528
658	274.2	10.3992	9.91015	10.1051	10.4	10.7039	10.8586
657	274.3	10.4031	9.91199	10.1084	10.4028	10.7087	10.8658
656	274.4	10.403	9.91242	10.1092	10.4011	10.7088	10.8667
655	274.5	10.4076	9.91281	10.1117	10.405	10.7137	10.8721
654	274.6	10.4101	9.92	10.1151	10.4052	10.715	10.8762
653	274.7	10.4111	9.92128	10.1177	10.4055	10.7169	10.8782
652	274.8	10.4137	9.92512	10.1223	10.406	10.7184	10.8818
651	274.9	10.4153	9.92695	10.124	10.4062	10.7204	10.8851
650	275	10.4159	9.93021	10.127	10.4049	10.7192	10.8864
649	275.1	10.4178	9.93366	10.1321	10.4064	10.7189	10.8867
648	275.2	10.4182	9.93547	10.1345	10.4053	10.7197	10.8884
647	275.3	10.4186	9.93874	10.1357	10.4045	10.7178	10.8882
646	275.4	10.4197	9.94102	10.1374	10.4049	10.7195	10.8875
645	275.5	10.4194	9.94589	10.1433	10.4036	10.7135	10.8855
644	275.6	10.4184	9.94729	10.1421	10.4006	10.7133	10.8839
643	275.7	10.4182	9.95125	10.1447	10.3999	10.7119	10.8837
642	275.8	10.4154	9.95274	10.1448	10.3962	10.7074	10.8794
641	275.9	10.4128	9.95274	10.1457	10.3946	10.7005	10.8715
640	276	10.4107	9.95423	10.1465	10.3927	10.6975	10.8648
639	276.1	10.4083	9.96036	10.1462	10.3882	10.6935	10.8604
638	276.2	10.4039	9.96295	10.1442	10.3843	10.6876	10.8531
637	276.3	10.4003	9.9631	10.1441	10.3818	10.6797	10.845
636	276.4	10.395	9.96383	10.1409	10.3761	10.6725	10.8361
635	276.5	10.3926	9.96975	10.141	10.3733	10.6681	10.8236
634	276.6	10.3857	9.96543	10.1366	10.368	10.6592	10.8116
633	276.7	10.3798	9.96677	10.1331	10.3629	10.6495	10.7979
632	276.8	10.3748	9.96776	10.13	10.3592	10.6385	10.7903
631	276.9	10.3661	9.96424	10.1261	10.3522	10.624	10.7734
630	277	10.3589	9.96799	10.1235	10.344	10.6123	10.7649
629	277.1	10.3522	9.9616	10.117	10.3386	10.6032	10.7546
628	277.2	10.343	9.96083	10.1134	10.3305	10.591	10.7345
627	277.3	10.3333	9.95579	10.105	10.3212	10.5792	10.7199
626	277.4	10.3248	9.95352	10.1011	10.3122	10.5647	10.7008
625	277.5	10.3144	9.94975	10.0923	10.3029	10.548	10.6859
624	277.6	10.3023	9.94332	10.08	10.2915	10.5309	10.6725
623	277.7	10.2916	9.93835	10.0711	10.2824	10.5169	10.6595
622	277.8	10.2814	9.9358	10.0638	10.2726	10.4993	10.6384
621	277.9	10.2686	9.92996	10.0529	10.2602	10.4849	10.6165
620	278	10.2558	9.92318	10.044	10.2503	10.4685	10.5951
619	278.1	10.2433	9.91609	10.0356	10.2374	10.4541	10.5805
618	278.2	10.2308	9.91076	10.0266	10.2236	10.4373	10.5631
617	278.3	10.2161	9.90582	10.0173	10.2085	10.4172	10.5397
616	278.4	10.2015	9.9002	10.0068	10.194	10.3964	10.5162
615	278.5	10.186	9.88563	9.99428	10.1794	10.3806	10.4905
614	278.6	10.1712	9.86788	9.97661	10.1652	10.3654	10.4787
613	278.7	10.156	9.85553	9.96418	10.1503	10.3472	10.4589
612	278.8	10.1412	9.84381	9.95114	10.1365	10.3275	10.4401
611	278.9	10.1244	9.82975	9.93786	10.1207	10.3076	10.405
610	279	10.1087	9.82332	9.92722	10.1039	10.2876	10.3879
609	279.1	10.093	9.81415	9.914	10.0887	10.2723	10.3756
608	279.2	10.0757	9.80745	9.90293	10.07	10.2504	10.3567
607	279.3	10.0561	9.79674	9.87886	10.0523	10.2228	10.326
606	279.4	10.0402	9.77043	9.86232	10.0374	10.2003	10.2984
605	279.5	10.0237	9.75383	9.84892	10.0228	10.1861	10.2856
604	279.6	10.0056	9.73707	9.83427	10.0035	10.1702	10.2726
603	279.7	9.98758	9.72531	9.82263	9.9837	10.1463	10.248
602	279.8	9.96939	9.71328	9.80796	9.96688	10.1216	10.2182
601	279.9	9.95119	9.70394	9.78734	9.94889	10.0973	10.1932
600	280	9.93393	9.6816	9.76737	9.93154	10.0824	10.1824
599	280.1	9.9145	9.65956	9.75134	9.91328	10.063	10.1655
598	280.2	9.89862	9.64255	9.73831	9.89831	10.0471	10.1466
597	280.3	9.87983	9.62976	9.72539	9.8775	10.0223	10.1117
596	280.4	9.86192	9.61577	9.70978	9.85781	9.99773	10.0927
595	280.5	9.84258	9.60468	9.69055	9.83941	9.9813	10.0783
594	280.6	9.8266	9.59042	9.67136	9.82444	9.96688	10.0655
593	280.7	9.80808	9.56409	9.65409	9.80829	9.94796	10.0421
592	280.8	9.78923	9.54324	9.63814	9.78547	9.92619	10.0178
591	280.9	9.77272	9.5283	9.62553	9.76774	9.89892	9.99496
590	281	9.75503	9.5166	9.61121	9.75099	9.8842	9.98051
589	281.1	9.73807	9.506	9.594	9.73657	9.87175	9.96671
588	281.2	9.72034	9.49478	9.57234	9.71962	9.85674	9.94839
587	281.3	9.70439	9.4659	9.5554	9.70278	9.84038	9.9309
586	281.4	9.68706	9.44319	9.54054	9.68274	9.81636	9.90403
585	281.5	9.67061	9.42753	9.52612	9.66659	9.79611	9.88915
584	281.6	9.65434	9.41528	9.51188	9.65264	9.78385	9.87729
583	281.7	9.63872	9.40567	9.49733	9.63851	9.77225	9.86531
582	281.8	9.62278	9.38665	9.47607	9.62311	9.75806	9.84618
581	281.9	9.60718	9.35861	9.45701	9.6075	9.74368	9.82866
580	282	9.59322	9.342	9.44306	9.59353	9.7264	9.79993
579	282.1	9.57742	9.32672	9.42772	9.57578	9.70891	9.79124
578	282.2	9.56343	9.31653	9.41495	9.56369	9.69399	9.78338
577	282.3	9.54967	9.30621	9.4021	9.5506	9.68407	9.77576
576	282.4	9.53546	9.28852	9.38337	9.53842	9.67315	9.7643
575	282.5	9.52154	9.25888	9.36526	9.5251	9.66262	9.75332
574	282.6	9.50884	9.24364	9.35216	9.51198	9.65193	9.73923
573	282.7	9.49526	9.23001	9.33709	9.49863	9.63832	9.71816
572	282.8	9.48318	9.21953	9.32325	9.48482	9.62585	9.70363
571	282.9	9.47173	9.21124	9.31214	9.47328	9.61357	9.69653
570	283	9.45792	9.20189	9.30049	9.45906	9.5971	9.69124
569	283.1	9.44792	9.18154	9.28898	9.44907	9.58987	9.68667
568	283.2	9.43648	9.15733	9.27436	9.43853	9.58237	9.68231
567	283.3	9.4262	9.14332	9.25942	9.429	9.5748	9.67503
566	283.4	9.41575	9.13228	9.24667	9.41897	9.56761	9.67161
565	283.5	9.40688	9.12098	9.23704	9.41045	9.56184	9.66687
564	283.6	9.39704	9.11215	9.22696	9.40135	9.55319	9.65899
563	283.7	9.38643	9.10296	9.21745	9.38902	9.54402	9.65335
562	283.8	9.37994	9.09324	9.21084	9.38036	9.5393	9.64944
561	283.9	9.37008	9.07652	9.20265	9.37034	9.52735	9.64158
560	284	9.36276	9.06362	9.19087	9.3629	9.5177	9.63508
559	284.1	9.35529	9.05233	9.17819	9.35574	9.51158	9.63122
558	284.2	9.34813	9.04406	9.16932	9.34941	9.50321	9.62524
557	284.3	9.34176	9.03333	9.16032	9.34288	9.5004	9.62383
556	284.4	9.33508	9.02366	9.15309	9.33724	9.49525	9.61766
555	284.5	9.32957	9.01778	9.14736	9.33151	9.49342	9.61317
554	284.6	9.32299	9.00825	9.13996	9.32557	9.48895	9.60412
553	284.7	9.31824	9.00484	9.13535	9.32078	9.48626	9.60265
552	284.8	9.3143	8.99854	9.13057	9.31748	9.48372	9.59952
551	284.9	9.31085	8.99424	9.12593	9.31337	9.48216	9.59878
550	285	9.3063	8.98602	9.12069	9.30962	9.47837	9.5961
549	285.1	9.30363	8.98218	9.11767	9.30701	9.47721	9.59552
548	285.2	9.29991	8.97494	9.11547	9.30284	9.47433	9.59409
547	285.3	9.29806	8.96943	9.11234	9.30103	9.4736	9.5945
546	285.4	9.29599	8.9669	9.11166	9.29755	9.47079	9.59371
545	285.5	9.29338	8.9604	9.10827	9.29604	9.4693	9.59198
544	285.6	9.29228	8.95819	9.1073	9.29438	9.468	9.59091
543	285.7	9.29294	8.95819	9.10694	9.29435	9.46982	9.59246
542	285.8	9.29356	8.9592	9.10739	9.29483	9.47034	9.59321
541	285.9	9.2935	8.95708	9.10719	9.29495	9.47078	9.59163
540	286	9.29417	8.95742	9.10722	9.29537	9.47068	9.59078
539	286.1	9.29548	8.9563	9.10775	9.29739	9.47217	9.59085
538	286.2	9.29701	8.95835	9.11081	9.29864	9.47258	9.59042
537	286.3	9.30049	8.96309	9.11366	9.30158	9.47623	9.59338
536	286.4	9.3034	8.96588	9.1138	9.30564	9.47972	9.59457
535	286.5	9.30632	8.96525	9.11517	9.30881	9.48206	9.59877
534	286.6	9.31185	8.97317	9.12129	9.31307	9.48673	9.60405
533	286.7	9.31716	8.97883	9.12625	9.31912	9.48994	9.60552
532	286.8	9.32228	8.98528	9.13135	9.32488	9.49465	9.61316
531	286.9	9.32798	8.99335	9.13793	9.33079	9.49839	9.61768
530	287	9.33508	9.00017	9.14604	9.33731	9.5066	9.62324
529	287.1	9.34223	9.00749	9.15409	9.34453	9.51481	9.62929
528	287.2	9.35032	9.01707	9.1644	9.35269	9.52241	9.63442
527	287.3	9.35857	9.02857	9.17549	9.36064	9.52999	9.6412
526	287.4	9.36789	9.03681	9.18678	9.36977	9.53955	9.64644
525	287.5	9.37841	9.04764	9.2008	9.38129	9.54859	9.65673
524	287.6	9.38888	9.05816	9.2101	9.39198	9.55876	9.66611
523	287.7	9.40078	9.0716	9.22197	9.40541	9.56729	9.67518
522	287.8	9.41298	9.08482	9.2336	9.41703	9.57681	9.6855
521	287.9	9.4266	9.10671	9.24864	9.42998	9.58671	9.69397
520	288	9.44117	9.12252	9.26649	9.44442	9.5965	9.69981
519	288.1	9.45488	9.13625	9.28748	9.45864	9.61028	9.71286
518	288.2	9.47154	9.15284	9.30598	9.47555	9.63151	9.7332
517	288.3	9.48822	9.1723	9.31908	9.49271	9.6477	9.74921
516	288.4	9.5058	9.19953	9.33602	9.51179	9.66331	9.76316
515	288.5	9.52472	9.21899	9.35671	9.52915	9.67742	9.77845
514	288.6	9.54361	9.23586	9.38436	9.54711	9.69077	9.79069
513	288.7	9.56349	9.25816	9.40854	9.56596	9.70783	9.80127
512	288.8	9.58496	9.28953	9.4241	9.59005	9.73477	9.83012
511	288.9	9.60777	9.31554	9.44751	9.61403	9.75663	9.85237
510	289	9.63156	9.33606	9.48276	9.63532	9.77536	9.8722
509	289.1	9.65623	9.36932	9.50894	9.65854	9.79255	9.88789
508	289.2	9.68174	9.40444	9.52833	9.68557	9.81815	9.9
507	289.3	9.7069	9.42836	9.5572	9.71175	9.8481	9.93704
506	289.4	9.73538	9.45835	9.60022	9.73795	9.87269	9.96552
505	289.5	9.76424	9.50157	9.6198	9.76638	9.89258	9.9851
504	289.6	9.7937	9.52853	9.64984	9.79682	9.92479	10.0011
503	289.7	9.8258	9.56397	9.69545	9.82839	9.95957	10.0468
502	289.8	9.85732	9.60825	9.71947	9.85871	9.98396	10.0729
501	289.9	9.89061	9.63776	9.75437	9.89179	10.0115	10.0946
500	290	9.92568	9.68582	9.80216	9.92799	10.0534	10.1301
499	290.1	9.96236	9.72062	9.82908	9.9622	10.0834	10.1688
498	290.2	9.99925	9.76756	9.87536	9.99904	10.1174	10.1932
497	290.3	10.0381	9.81066	9.91403	10.0388	10.1603	10.2366
496	290.4	10.0779	9.84893	9.95182	10.0754	10.1919	10.2751
495	290.5	10.1176	9.90346	10.0033	10.1174	10.2357	10.2992
494	290.6	10.1614	9.94401	10.0394	10.1592	10.2757	10.3559
493	290.7	10.2044	10.0023	10.0931	10.202	10.3159	10.3866
492	290.8	10.2491	10.0384	10.1308	10.247	10.3619	10.4369
491	290.9	10.2969	10.1032	10.1887	10.2937	10.3996	10.4788
490	291	10.3451	10.1409	10.2287	10.3428	10.456	10.5247
489	291.1	10.3936	10.2053	10.2865	10.3889	10.4965	10.5745
488	291.2	10.4442	10.2468	10.329	10.4407	10.5521	10.6157
487	291.3	10.4955	10.3083	10.3936	10.4899	10.5964	10.674
486	291.4	10.549	10.358	10.4342	10.5455	10.6561	10.72
485	291.5	10.6029	10.4152	10.5029	10.5984	10.7013	10.7776
484	291.6	10.6598	10.478	10.5455	10.6545	10.7637	10.8322
483	291.7	10.717	10.53	10.6117	10.713	10.8225	10.8846
482	291.8	10.7751	10.6036	10.6652	10.7672	10.8776	10.9535
481	291.9	10.8356	10.6484	10.7238	10.8327	10.9423	10.9956
480	292	10.8968	10.717	10.7972	10.8867	10.9976	11.0731
479	292.1	10.9599	10.7828	10.8448	10.954	11.0648	11.135
478	292.2	11.0247	10.8373	10.9142	11.0186	11.1328	11.1909
477	292.3	11.0888	10.9123	10.9781	11.0798	11.1907	11.2686
476	292.4	11.1551	10.975	11.0383	11.1492	11.2613	11.3281
475	292.5	11.2223	11.0344	11.1118	11.2173	11.3295	11.3907
474	292.6	11.2924	11.1129	11.177	11.2852	11.3942	11.4736
473	292.7	11.362	11.1818	11.2409	11.3548	11.4698	11.5459
472	292.8	11.4324	11.239	11.3159	11.4276	11.5431	11.5958
471	292.9	11.5053	11.317	11.3858	11.5003	11.6129	11.6842
470	293	11.5782	11.4012	11.4527	11.5726	11.6852	11.7664
469	293.1	11.6518	11.4499	11.5271	11.6472	11.7631	11.8303
468	293.2	11.7263	11.5242	11.6026	11.7229	11.8417	11.8955
467	293.3	11.8033	11.6095	11.6738	11.7991	11.916	11.9863
466	293.4	11.8793	11.6761	11.7473	11.8745	11.9902	12.0744
465	293.5	11.9569	11.7422	11.8247	11.9531	12.0728	12.1542
464	293.6	12.0351	11.823	11.9054	12.0325	12.1553	12.2238
463	293.7	12.1142	11.9055	11.9796	12.1118	12.2356	12.2979
462	293.8	12.193	11.9685	12.0524	12.1898	12.3091	12.3906
461	293.9	12.2722	12.041	12.1299	12.2673	12.3904	12.482
460	294	12.3513	12.1212	12.2114	12.3473	12.475	12.5667
459	294.1	12.4331	12.2035	12.2913	12.4313	12.5626	12.6547
458	294.2	12.5135	12.2729	12.3647	12.5128	12.6444	12.7309
457	294.3	12.5923	12.3451	12.4409	12.5889	12.7213	12.8009
456	294.4	12.6727	12.4221	12.5215	12.6676	12.7989	12.894
455	294.5	12.7531	12.5054	12.6045	12.7493	12.8857	12.985
454	294.6	12.8348	12.5821	12.68	12.8313	12.9738	13.0769
453	294.7	12.9156	12.6467	12.7538	12.9142	13.0605	13.1663
452	294.8	12.9927	12.7219	12.8306	12.9883	13.1399	13.249
451	294.9	13.0732	12.8051	12.911	13.0668	13.2213	13.3324
450	295	13.1535	12.8805	12.9914	13.1469	13.3015	13.406
449	295.1	13.2301	12.9418	13.0576	13.2239	13.3849	13.492
448	295.2	13.3078	13.0176	13.134	13.3006	13.4691	13.5781
447	295.3	13.385	13.1011	13.2124	13.3772	13.5536	13.6686
446	295.4	13.4594	13.1593	13.2813	13.4497	13.6308	13.746
445	295.5	13.5338	13.2247	13.3482	13.5255	13.7058	13.8135
444	295.6	13.6099	13.3055	13.425	13.5987	13.7874	13.8933
443	295.7	13.6816	13.3655	13.4942	13.6704	13.8652	13.9802
442	295.8	13.7523	13.4315	13.5559	13.7412	13.9425	14.0613
441	295.9	13.822	13.5019	13.6261	13.8097	14.0164	14.1307
440	296	13.8929	13.5571	13.6915	13.8794	14.0898	14.1993
439	296.1	13.9576	13.6216	13.7521	13.9465	14.1568	14.279
438	296.2	14.0229	13.6845	13.8169	14.0105	14.2301	14.3522
437	296.3	14.086	13.7358	13.8761	14.0734	14.2929	14.4141
436	296.4	14.1497	13.8029	13.9346	14.1375	14.3606	14.4863
435	296.5	14.2107	13.8503	13.9986	14.196	14.4273	14.5572
434	296.6	14.2684	13.9066	14.0458	14.2559	14.4863	14.6163
433	296.7	14.3258	13.9561	14.1046	14.3119	14.5495	14.6815
432	296.8	14.381	14.0102	14.1524	14.3678	14.6035	14.7436
431	296.9	14.4341	14.0603	14.2072	14.421	14.6604	14.7937
430	297	14.485	14.1089	14.2485	14.4703	14.7155	14.8571
429	297.1	14.5365	14.1569	14.3035	14.5219	14.7692	14.9116
428	297.2	14.5817	14.2059	14.3427	14.5664	14.8159	14.9607
427	297.3	14.6269	14.2453	14.3823	14.6113	14.864	15.0113
426	297.4	14.671	14.2861	14.4276	14.6563	14.9113	15.0588
425	297.5	14.7126	14.3261	14.4599	14.6972	14.9562	15.0997
424	297.6	14.7513	14.3683	14.5046	14.7362	14.9911	15.1468
423	297.7	14.7885	14.4059	14.5378	14.7737	15.034	15.1808
422	297.8	14.8239	14.434	14.5655	14.808	15.0718	15.2284
421	297.9	14.8571	14.468	14.6031	14.8428	15.1019	15.2628
420	298	14.8878	14.5034	14.6294	14.8738	15.1398	15.2885
419	298.1	14.9162	14.5271	14.6563	14.9011	15.1641	15.3267
418	298.2	14.9443	14.5538	14.685	14.9303	15.1912	15.3605
417	298.3	14.9703	14.579	14.712	14.9564	15.2186	15.3813
416	298.4	14.9936	14.606	14.732	14.9788	15.2449	15.4024
415	298.5	15.0161	14.6282	14.7534	15.0017	15.2661	15.4308
414	298.6	15.0337	14.6409	14.7703	15.02	15.2832	15.4579
413	298.7	15.0543	14.6592	14.7946	15.0407	15.3004	15.4765
412	298.8	15.0689	14.6733	14.8096	15.0543	15.3181	15.4895
411	298.9	15.0843	14.6947	14.8258	15.0699	15.3332	15.4987
410	299	15.0964	14.7085	14.8368	15.0819	15.3459	15.5203
409	299.1	15.1105	14.7213	14.8501	15.0958	15.3587	15.5353
408	299.2	15.1202	14.7259	14.8583	15.1054	15.37	15.5498
407	299.3	15.1277	14.7361	14.8676	15.1115	15.3769	15.5553
406	299.4	15.1351	14.7435	14.8787	15.1214	15.3805	15.557
405	299.5	15.1405	14.7493	14.8859	15.1265	15.3824	15.5609
404	299.6	15.145	14.7509	14.8918	15.1295	15.3878	15.5671
403	299.7	15.1486	14.7553	14.8989	15.135	15.3888	15.565
402	299.8	15.1508	14.7535	14.9009	15.1376	15.3898	15.5671
401	299.9	15.1532	14.7623	14.9066	15.1403	15.3911	15.5667
400	300	15.1532	14.7589	14.9059	15.1417	15.3897	15.5634
399	300.1	15.1522	14.758	14.9063	15.1405	15.3905	15.5619
398	300.2	15.149	14.7562	14.9045	15.138	15.3853	15.5554
397	300.3	15.1478	14.7557	14.9034	15.1374	15.3838	15.555
396	300.4	15.1436	14.7544	14.9018	15.1343	15.3778	15.5441
395	300.5	15.1412	14.7545	14.9019	15.1316	15.3739	15.5379
394	300.6	15.1345	14.7458	14.8922	15.1276	15.3668	15.5292
393	300.7	15.1314	14.743	14.889	15.1242	15.3639	15.5239
392	300.8	15.1251	14.7397	14.8826	15.1178	15.3575	15.5146
391	300.9	15.1192	14.7351	14.8771	15.1122	15.3499	15.5102
390	301	15.1136	14.7301	14.8698	15.1063	15.3436	15.4983
389	301.1	15.1052	14.722	14.8606	15.0985	15.3351	15.4912
388	301.2	15.0995	14.7186	14.8562	15.0934	15.3258	15.4827
387	301.3	15.0913	14.7098	14.849	15.0848	15.3178	15.4765
386	301.4	15.0854	14.7056	14.8445	15.0796	15.3105	15.4713
385	301.5	15.0775	14.6962	14.8351	15.0719	15.3008	15.4645
384	301.6	15.068	14.6808	14.8244	15.0632	15.2932	15.4565
383	301.7	15.0602	14.6727	14.8185	15.0534	15.2872	15.449
382	301.8	15.0531	14.6636	14.8099	15.0462	15.2827	15.444
381	301.9	15.0455	14.6535	14.7994	15.0383	15.275	15.4342
380	302	15.0381	14.646	14.7906	15.0303	15.2674	15.4259
379	302.1	15.0306	14.6407	14.7849	15.0222	15.2598	15.4187
378	302.2	15.0223	14.6299	14.7751	15.0136	15.2528	15.4157
377	302.3	15.015	14.6203	14.7667	15.0069	15.2469	15.406
376	302.4	15.009	14.6135	14.759	14.9995	15.2411	15.3996
375	302.5	15.0002	14.6086	14.7496	14.992	15.2317	15.3956
374	302.6	14.9939	14.601	14.7433	14.9861	15.2255	15.3911
373	302.7	14.9875	14.5894	14.7346	14.9793	15.2191	15.3905
372	302.8	14.9824	14.5806	14.7286	14.976	15.2146	15.3861
371	302.9	14.9758	14.5723	14.7204	14.9689	15.2076	15.385
370	303	14.9701	14.5614	14.7115	14.9645	15.2028	15.3828
369	303.1	14.9647	14.5553	14.7062	14.9598	15.1967	15.376
368	303.2	14.9607	14.5526	14.7004	14.9547	15.1945	15.3721
367	303.3	14.9558	14.546	14.6935	14.9503	15.1914	15.3684
366	303.4	14.9534	14.5409	14.6884	14.9483	15.191	15.3677
365	303.5	14.9487	14.534	14.6795	14.944	15.1894	15.3653
364	303.6	14.9472	14.5311	14.6779	14.9419	15.1895	15.3663
363	303.7	14.9437	14.525	14.6706	14.9397	15.1875	15.364
362	303.8	14.9416	14.5213	14.6672	14.9374	15.1887	15.3646
361	303.9	14.9402	14.5171	14.6639	14.9363	15.1888	15.3654
360	304	14.9385	14.5152	14.6605	14.9341	15.1897	15.3661
359	304.1	14.9389	14.5125	14.661	14.9346	15.1897	15.3648
358	304.2	14.9381	14.5087	14.6578	14.9345	15.1913	15.3684
357	304.3	14.9379	14.5047	14.6552	14.9341	15.1925	15.369
356	304.4	14.9397	14.5055	14.6557	14.936	15.195	15.374
355	304.5	14.9418	14.5027	14.6559	14.9385	15.1984	15.3788
354	304.6	14.9427	14.5046	14.6553	14.939	15.1996	15.3807
353	304.7	14.9463	14.5042	14.6568	14.9428	15.2077	15.3891
352	304.8	14.9492	14.5055	14.66	14.9462	15.2134	15.391
351	304.9	14.9521	14.5069	14.6624	14.9481	15.2175	15.396
350	305	14.9569	14.508	14.6649	14.9543	15.2254	15.4062
349	305.1	14.9598	14.5097	14.6673	14.9557	15.2302	15.4111
348	305.2	14.9664	14.514	14.6708	14.9621	15.2405	15.4269
347	305.3	14.972	14.517	14.6756	14.9701	15.2466	15.432
346	305.4	14.9775	14.5189	14.6805	14.9742	15.2549	15.4414
345	305.5	14.9833	14.5235	14.6845	14.9801	15.2622	15.4481
344	305.6	14.9901	14.5274	14.6916	14.9856	15.2711	15.4571
343	305.7	14.9972	14.5316	14.6982	14.9943	15.2788	15.464
342	305.8	15.0062	14.5379	14.705	15.0023	15.2881	15.4744
341	305.9	15.0145	14.5438	14.7112	15.0115	15.2969	15.4814
340	306	15.0242	14.5531	14.7206	15.0198	15.3099	15.4906
339	306.1	15.0334	14.5611	14.7271	15.0301	15.3212	15.4996
338	306.2	15.043	14.5687	14.7365	15.0405	15.3318	15.5113
337	306.3	15.0529	14.5804	14.7452	15.0501	15.3447	15.525
336	306.4	15.0633	14.5907	14.7559	15.0609	15.3552	15.5349
335	306.5	15.0741	14.6027	14.7664	15.0717	15.3662	15.5468
334	306.6	15.0859	14.6107	14.778	15.0839	15.3763	15.5572
333	306.7	15.0978	14.6189	14.7898	15.098	15.3888	15.5672
332	306.8	15.1103	14.6285	14.8016	15.1099	15.399	15.5804
331	306.9	15.1236	14.6376	14.8127	15.1249	15.417	15.5878
330	307	15.1348	14.6485	14.8242	15.134	15.4298	15.5994
329	307.1	15.1486	14.658	14.8386	15.1502	15.4437	15.615
328	307.2	15.163	14.6736	14.8495	15.163	15.4581	15.6322
327	307.3	15.1762	14.686	14.8634	15.1761	15.471	15.6435
326	307.4	15.1909	14.7027	14.8787	15.191	15.4849	15.6547
325	307.5	15.2026	14.7123	14.8941	15.2033	15.4953	15.6653
324	307.6	15.2197	14.7271	14.9115	15.2187	15.5108	15.6807
323	307.7	15.2338	14.7374	14.9243	15.235	15.5301	15.6923
322	307.8	15.2518	14.7525	14.9401	15.2527	15.5472	15.7058
321	307.9	15.2662	14.7659	14.9562	15.266	15.5611	15.7201
320	308	15.2823	14.7818	14.9754	15.2823	15.579	15.741
319	308.1	15.2985	14.8012	14.9955	15.2979	15.5895	15.7585
318	308.2	15.3142	14.8114	15.0102	15.3139	15.6069	15.7719
317	308.3	15.3293	14.8217	15.0243	15.3281	15.6229	15.7851
316	308.4	15.3455	14.8378	15.0394	15.3454	15.641	15.7987
315	308.5	15.362	14.8493	15.0574	15.3643	15.6548	15.8231
314	308.6	15.3773	14.8611	15.0763	15.3793	15.6699	15.8375
313	308.7	15.3959	14.8836	15.0974	15.3998	15.6833	15.8582
312	308.8	15.412	14.8966	15.1129	15.4132	15.6964	15.872
311	308.9	15.4292	14.9112	15.1261	15.4312	15.7171	15.891
310	309	15.4475	14.9276	15.1451	15.4489	15.7379	15.9085
309	309.1	15.4627	14.9423	15.1618	15.4661	15.7527	15.9228
308	309.2	15.4815	14.9664	15.1808	15.4858	15.7706	15.9497
307	309.3	15.4982	14.9791	15.1996	15.5038	15.7872	15.971
306	309.4	15.5148	15.0014	15.2161	15.5198	15.8027	15.9824
305	309.5	15.5316	15.0156	15.2295	15.5369	15.8195	16.0034
304	309.6	15.5494	15.0331	15.2473	15.5552	15.84	16.0245
303	309.7	15.5663	15.0535	15.2673	15.5706	15.8559	16.0399
302	309.8	15.5841	15.07	15.2855	15.5925	15.8741	16.0623
301	309.9	15.5983	15.0865	15.3017	15.6073	15.8869	16.0775
300	310	15.616	15.1073	15.3181	15.6219	15.9026	16.0944
299	310.1	15.6322	15.1225	15.3319	15.6382	15.9204	16.1089
298	310.2	15.649	15.1388	15.3465	15.6537	15.9408	16.1268
297	310.3	15.6636	15.1498	15.3629	15.6678	15.9581	16.1448
296	310.4	15.68	15.1657	15.3798	15.6821	15.9742	16.1611
295	310.5	15.6954	15.1839	15.3973	15.6981	15.9893	16.1777
294	310.6	15.7106	15.1955	15.407	15.7141	16.0059	16.1934
293	310.7	15.7266	15.2129	15.4206	15.7287	16.0247	16.2071
292	310.8	15.7413	15.2166	15.4357	15.7418	16.0443	16.2252
291	310.9	15.757	15.2302	15.447	15.7568	16.0611	16.242
290	311	15.7688	15.2448	15.4578	15.7682	16.0731	16.2548
289	311.1	15.7831	15.2561	15.47	15.7829	16.0894	16.2707
288	311.2	15.7966	15.2662	15.4853	15.7948	16.1023	16.2843
287	311.3	15.8105	15.2743	15.497	15.8102	16.1243	16.2951
286	311.4	15.8237	15.2846	15.5081	15.823	16.1412	16.3148
285	311.5	15.8362	15.2971	15.5144	15.8363	16.1547	16.3337
284	311.6	15.8476	15.3009	15.5222	15.8455	16.1692	16.3508
283	311.7	15.8603	15.3106	15.5317	15.8587	16.1825	16.3648
282	311.8	15.8725	15.3232	15.5389	15.8715	16.1945	16.377
281	311.9	15.8819	15.3269	15.5444	15.879	16.2089	16.3901
280	312	15.8915	15.3295	15.5509	15.8891	16.2248	16.4045
279	312.1	15.9011	15.3389	15.5573	15.8999	16.2389	16.4248
278	312.2	15.9096	15.3459	15.5654	15.9073	16.2487	16.4388
277	312.3	15.9192	15.3535	15.5717	15.9176	16.26	16.4521
276	312.4	15.927	15.3566	15.5768	15.9253	16.2708	16.466
275	312.5	15.9348	15.3595	15.5818	15.9325	16.279	16.4778
274	312.6	15.9418	15.3659	15.5857	15.9384	16.2874	16.4885
273	312.7	15.9501	15.3707	15.594	15.9458	16.2959	16.499
272	312.8	15.9545	15.3697	15.5959	15.95	16.3007	16.5155
271	312.9	15.9628	15.3749	15.602	15.9579	16.3174	16.5322
270	313	15.9669	15.3782	15.6031	15.9608	16.3245	16.548
269	313.1	15.9722	15.3785	15.605	15.9661	16.3333	16.5619
268	313.2	15.9742	15.3751	15.6028	15.9685	16.3386	16.573
267	313.3	15.9784	15.378	15.6043	15.9725	16.3433	16.5798
266	313.4	15.9812	15.3771	15.6048	15.9752	16.3475	16.586
265	313.5	15.9824	15.3737	15.6023	15.9762	16.3513	16.5938
264	313.6	15.9846	15.3738	15.6038	15.9787	16.354	16.5994
263	313.7	15.9849	15.3718	15.6036	15.9799	16.355	16.6064
262	313.8	15.9865	15.3693	15.6035	15.9795	16.3586	16.6141
261	313.9	15.9867	15.3669	15.6045	15.9793	16.3596	16.6192
260	314	15.9844	15.3605	15.6021	15.9757	16.3598	16.6201
259	314.1	15.9823	15.3584	15.6014	15.9719	16.3608	16.6205
258	314.2	15.9809	15.3541	15.5994	15.9696	16.3605	16.6203
257	314.3	15.9775	15.3501	15.5939	15.9646	16.3588	16.6228
256	314.4	15.9736	15.3459	15.5888	15.9596	16.3562	16.6218
255	314.5	15.972	15.3432	15.5855	15.9555	16.3582	16.6282
254	314.6	15.9651	15.3381	15.5782	15.9481	16.3524	16.6184
253	314.7	15.9608	15.3305	15.5693	15.9429	16.3519	16.6192
252	314.8	15.9566	15.3251	15.5634	15.9385	16.348	16.6112
251	314.9	15.9496	15.3202	15.5553	15.9288	16.3438	16.6056
250	315	15.9441	15.3113	15.5492	15.9225	16.3402	16.5997
249	315.1	15.9361	15.305	15.5409	15.9113	16.3336	16.5963
248	315.2	15.9301	15.3016	15.5344	15.9023	16.3298	16.5966
247	315.3	15.9196	15.2956	15.5261	15.8902	16.3159	16.5837
246	315.4	15.9102	15.2819	15.5155	15.8811	16.3075	16.578
245	315.5	15.9014	15.2737	15.5057	15.8714	16.2981	16.5694
244	315.6	15.8921	15.2653	15.4988	15.8606	16.2887	16.5621
243	315.7	15.8815	15.2559	15.4856	15.8503	16.2816	16.5551
242	315.8	15.8709	15.2411	15.4743	15.8391	16.2705	16.5433
241	315.9	15.8605	15.2347	15.4645	15.8272	16.2609	16.5322
240	316	15.8464	15.2193	15.4477	15.8138	16.2456	16.5146
239	316.1	15.8367	15.2119	15.4376	15.8039	16.2358	16.5089
238	316.2	15.8232	15.2033	15.4277	15.7892	16.2224	16.4941
237	316.3	15.8102	15.19	15.4141	15.778	16.2073	16.4893
236	316.4	15.7974	15.175	15.4015	15.7652	16.1928	16.4805
235	316.5	15.7847	15.1591	15.3884	15.7547	16.1797	16.4591
234	316.6	15.7708	15.1488	15.3746	15.7422	16.1644	16.4479
233	316.7	15.7554	15.1312	15.3576	15.7272	16.1529	16.4397
232	316.8	15.7414	15.1213	15.3464	15.7146	16.1355	16.4218
231	316.9	15.7277	15.1085	15.332	15.7017	16.1188	16.4044
230	317	15.7118	15.092	15.3145	15.6865	16.1033	16.3885
229	317.1	15.6962	15.0768	15.3018	15.6711	16.0861	16.3776
228	317.2	15.6802	15.0589	15.2836	15.658	16.072	16.3615
227	317.3	15.6639	15.0395	15.2661	15.6418	16.0557	16.3457
226	317.4	15.6499	15.0246	15.2512	15.628	16.0389	16.3245
225	317.5	15.6342	15.0137	15.2354	15.6136	16.0222	16.3108
224	317.6	15.6177	14.9959	15.2166	15.5963	16.0073	16.2906
223	317.7	15.5996	14.9787	15.2008	15.5805	15.9851	16.2722
222	317.8	15.5846	14.958	15.1847	15.5662	15.9724	16.2585
221	317.9	15.5676	14.9444	15.1671	15.5496	15.9561	16.2394
220	318	15.5504	14.9312	15.1496	15.5334	15.9384	16.217
219	318.1	15.5348	14.916	15.1332	15.5192	15.9239	16.1972
218	318.2	15.5195	14.9	15.1181	15.5042	15.9091	16.185
217	318.3	15.5019	14.8799	15.1012	15.4864	15.8925	16.1647
216	318.4	15.484	14.8617	15.0803	15.4672	15.8766	16.1459
215	318.5	15.4686	14.8444	15.0637	15.4517	15.8615	16.1288
214	318.6	15.4516	14.8291	15.046	15.4354	15.8467	16.1117
213	318.7	15.4351	14.8138	15.0285	15.4206	15.8312	16.0878
212	318.8	15.4154	14.7983	15.0103	15.3978	15.814	16.0711
211	318.9	15.4015	14.779	14.9926	15.386	15.7971	16.0583
210	319	15.3848	14.7622	14.9731	15.3685	15.7843	16.0435
209	319.1	15.3692	14.7429	14.9571	15.3518	15.7704	16.0283
208	319.2	15.3541	14.7284	14.9405	15.3379	15.758	16.0169
207	319.3	15.338	14.7121	14.9232	15.3224	15.7429	16.002
206	319.4	15.3215	14.6939	14.9049	15.3072	15.7263	15.989
205	319.5	15.3054	14.6748	14.8877	15.2917	15.7111	15.9734
204	319.6	15.2904	14.6532	14.8713	15.2759	15.6966	15.9608
203	319.7	15.2757	14.6357	14.8536	15.2622	15.6831	15.9512
202	319.8	15.2602	14.6199	14.8376	15.2457	15.6704	15.9403
201	319.9	15.2458	14.6047	14.8219	15.2324	15.6575	15.9286
200	320	15.2304	14.58	14.8023	15.2156	15.6455	15.9132
199	320.1	15.2166	14.5577	14.786	15.2024	15.6322	15.9058
198	320.2	15.2039	14.5393	14.7685	15.1913	15.6232	15.8939
197	320.3	15.188	14.5223	14.7512	15.1747	15.6081	15.8855
196	320.4	15.1745	14.5037	14.7343	15.1617	15.5961	15.8851
195	320.5	15.1617	14.476	14.7188	15.1511	15.5865	15.8795
194	320.6	15.1484	14.4573	14.7031	15.1365	15.5761	15.8708
193	320.7	15.1356	14.4376	14.6812	15.1247	15.5696	15.8663
192	320.8	15.1235	14.4215	14.6653	15.1128	15.558	15.8614
191	320.9	15.1109	14.4016	14.648	15.1007	15.5484	15.8563
190	321	15.1005	14.3817	14.633	15.0903	15.5436	15.8573
189	321.1	15.0903	14.361	14.6165	15.0798	15.5391	15.8552
188	321.2	15.0769	14.3402	14.6004	15.0671	15.5272	15.8507
187	321.3	15.0673	14.3231	14.5834	15.0593	15.5227	15.8513
186	321.4	15.057	14.3051	14.565	15.0486	15.5161	15.8513
185	321.5	15.0488	14.2859	14.5501	15.0401	15.5123	15.851
184	321.6	15.0384	14.2651	14.5335	15.028	15.5098	15.8488
183	321.7	15.0283	14.2502	14.5186	15.0171	15.503	15.8495
182	321.8	15.0195	14.2334	14.5045	15.0084	15.502	15.8475
181	321.9	15.0118	14.2107	14.4837	15.0023	15.5028	15.853
180	322	15.0032	14.1935	14.4741	14.9918	15.5008	15.8579
179	322.1	14.9953	14.1755	14.4604	14.9832	15.4993	15.8622
178	322.2	14.9872	14.159	14.4464	14.9748	15.4978	15.8647
177	322.3	14.9805	14.1457	14.4327	14.9687	15.4984	15.867
176	322.4	14.9738	14.132	14.4204	14.9593	15.4971	15.8683
175	322.5	14.9672	14.1185	14.4061	14.9511	15.4984	15.8758
174	322.6	14.9615	14.1013	14.3902	14.9481	15.4973	15.8851
173	322.7	14.9552	14.0877	14.3795	14.9397	15.5014	15.8889
172	322.8	14.9501	14.0756	14.3698	14.9345	15.5031	15.892
171	322.9	14.9442	14.0594	14.3583	14.9251	15.5049	15.899
170	323	14.9394	14.0439	14.3445	14.9222	15.5064	15.9063
169	323.1	14.9364	14.0347	14.3329	14.9165	15.514	15.9168
168	323.2	14.931	14.0215	14.3213	14.9087	15.5158	15.9146
167	323.3	14.9271	14.0097	14.3096	14.9042	15.5222	15.9271
166	323.4	14.9246	14.0019	14.303	14.9037	15.5246	15.9401
165	323.5	14.9217	13.9871	14.2934	14.9027	15.5349	15.9503
164	323.6	14.9177	13.9784	14.2852	14.8959	15.5382	15.9568
163	323.7	14.913	13.9645	14.2742	14.8917	15.5409	15.9618
162	323.8	14.9128	13.9534	14.2668	14.8917	15.5496	15.9731
161	323.9	14.9104	13.9425	14.2606	14.8879	15.5531	15.9818
160	324	14.9092	13.9325	14.253	14.8892	15.5565	15.9899
159	324.1	14.9081	13.9219	14.2472	14.8875	15.5649	15.9986
158	324.2	14.9042	13.9153	14.2414	14.8801	15.5638	16.0061
157	324.3	14.9049	13.9093	14.2387	14.8794	15.5708	16.0135
156	324.4	14.9039	13.904	14.2341	14.8779	15.5755	16.0173
155	324.5	14.9026	13.8908	14.23	14.8736	15.5791	16.0263
154	324.6	14.9048	13.8876	14.2287	14.8738	15.5895	16.0375
153	324.7	14.9029	13.8781	14.2253	14.8694	15.5894	16.0409
152	324.8	14.9046	13.8714	14.2254	14.8726	15.5924	16.0472
151	324.9	14.9056	13.8686	14.2258	14.8698	15.597	16.0482
150	325	14.9066	13.8642	14.2243	14.8706	15.6013	16.06
149	325.1	14.9069	13.8568	14.2263	14.8701	15.6031	16.0659
148	325.2	14.9073	13.853	14.2233	14.8701	15.608	16.0673
147	325.3	14.9094	13.8559	14.2272	14.8699	15.6127	16.0719
146	325.4	14.9098	13.8544	14.2279	14.869	15.6145	16.0739
145	325.5	14.9144	13.8524	14.2295	14.8706	15.6234	16.0766
144	325.6	14.9145	13.8541	14.2296	14.8713	15.6195	16.0742
143	325.7	14.9158	13.8491	14.2311	14.8692	15.6268	16.082
142	325.8	14.9202	13.8497	14.2367	14.872	15.6279	16.0901
141	325.9	14.9233	13.8517	14.2391	14.8757	15.6321	16.0927
140	326	14.9259	13.8511	14.2422	14.8764	15.6358	16.0933
139	326.1	14.9288	13.8556	14.2475	14.8792	15.6365	16.0969
138	326.2	14.933	13.8607	14.2553	14.8815	15.6399	16.0974
137	326.3	14.9357	13.8619	14.2617	14.8823	15.6433	16.0962
136	326.4	14.9398	13.8727	14.2693	14.8858	15.6466	16.0919
135	326.5	14.9407	13.8726	14.274	14.8861	15.6441	16.0922
134	326.6	14.9483	13.8809	14.2824	14.8917	15.6511	16.0967
133	326.7	14.9517	13.8837	14.2906	14.8938	15.6531	16.0936
132	326.8	14.9554	13.8947	14.3008	14.8932	15.6526	16.0889
131	326.9	14.961	13.9005	14.3075	14.8996	15.6552	16.088
130	327	14.9666	13.9102	14.3159	14.9044	15.6557	16.0866
129	327.1	14.9719	13.922	14.3241	14.9112	15.6571	16.0738
128	327.2	14.977	13.9396	14.3347	14.9146	15.6606	16.0738
127	327.3	14.9823	13.9458	14.348	14.92	15.6591	16.0671
126	327.4	14.9871	13.958	14.3596	14.9269	15.6572	16.0578
125	327.5	14.9932	13.9737	14.3714	14.931	15.6547	16.0546
124	327.6	15.0002	13.984	14.3837	14.939	15.6584	16.0429
123	327.7	15.0061	13.994	14.3963	14.9472	15.6568	16.041
122	327.8	15.0128	14.0144	14.4098	14.9563	15.6567	16.0319
121	327.9	15.0185	14.0325	14.4197	14.9619	15.6563	16.0284
120	328	15.029	14.0577	14.4415	14.975	15.6559	16.0164
119	328.1	15.0345	14.0708	14.4541	14.9839	15.6516	16.0075
118	328.2	15.0424	14.089	14.4745	14.9938	15.656	16
117	328.3	15.0495	14.1109	14.4886	15.0015	15.6523	15.9958
116	328.4	15.0601	14.1388	14.5109	15.0132	15.6522	15.992
115	328.5	15.0668	14.1565	14.5207	15.0241	15.651	15.9844
114	328.6	15.0749	14.1788	14.5347	15.0341	15.6498	15.9775
113	328.7	15.0855	14.2074	14.5572	15.042	15.6544	15.9729
112	328.8	15.0967	14.2304	14.5793	15.0555	15.6523	15.9643
111	328.9	15.1053	14.2563	14.5991	15.0667	15.6511	15.9543
110	329	15.1156	14.2887	14.6202	15.0784	15.6483	15.9475
109	329.1	15.1279	14.3155	14.6388	15.0951	15.6485	15.9425
108	329.2	15.139	14.3429	14.662	15.1055	15.648	15.9377
107	329.3	15.1494	14.3746	14.6848	15.1171	15.6463	15.9347
106	329.4	15.1615	14.4049	14.7107	15.1323	15.6424	15.9218
105	329.5	15.1754	14.4337	14.7288	15.1467	15.6472	15.9236
104	329.6	15.1851	14.4643	14.7512	15.1593	15.6413	15.9137
103	329.7	15.1965	14.4965	14.7764	15.1747	15.6337	15.8984
102	329.8	15.2127	14.5354	14.8079	15.1922	15.6355	15.8951
101	329.9	15.2246	14.5659	14.8266	15.2029	15.6312	15.89
100	330	15.2401	14.6038	14.856	15.2201	15.6331	15.8872
99	330.1	15.2528	14.6381	14.8807	15.2335	15.6334	15.8863
98	330.2	15.2686	14.6749	14.9094	15.2514	15.6343	15.8843
97	330.3	15.2828	14.7111	14.9308	15.2688	15.6328	15.8829
96	330.4	15.3	14.7489	14.9554	15.2847	15.6372	15.8821
95	330.5	15.3161	14.7912	14.9846	15.3019	15.6389	15.8768
94	330.6	15.3332	14.8267	15.0169	15.32	15.6449	15.8753
93	330.7	15.3516	14.8637	15.0409	15.3394	15.6495	15.8779
92	330.8	15.3691	14.9091	15.0697	15.3563	15.6526	15.8735
91	330.9	15.387	14.9398	15.1005	15.3743	15.6591	15.8724
90	331	15.4065	14.9842	15.1291	15.3924	15.6674	15.8751
89	331.1	15.4239	15.0134	15.1568	15.4098	15.6725	15.8721
88	331.2	15.4458	15.0447	15.1859	15.4321	15.6832	15.8817
87	331.3	15.4647	15.085	15.2208	15.4504	15.6919	15.8842
86	331.4	15.4853	15.113	15.25	15.4702	15.7025	15.8884
85	331.5	15.5072	15.1397	15.2776	15.4917	15.7251	15.8944
84	331.6	15.5299	15.1803	15.3102	15.5144	15.7417	15.9015
83	331.7	15.5504	15.2051	15.3298	15.536	15.76	15.9075
82	331.8	15.5753	15.2262	15.3573	15.5619	15.7828	15.9283
81	331.9	15.5986	15.249	15.3883	15.5852	15.8045	15.9483
80	332	15.6214	15.2723	15.4086	15.6116	15.8326	15.9691
79	332.1	15.6474	15.3038	15.4299	15.6392	15.8596	15.9893
78	332.2	15.673	15.3145	15.4524	15.6635	15.8886	16.0182
77	332.3	15.6985	15.328	15.4748	15.6888	15.9151	16.0542
76	332.4	15.7242	15.345	15.5016	15.7178	15.9486	16.0836
75	332.5	15.7509	15.3571	15.5199	15.7431	15.981	16.1255
74	332.6	15.78	15.3702	15.5413	15.77	16.0206	16.1667
73	332.7	15.8071	15.3788	15.5623	15.7984	16.0536	16.1979
72	332.8	15.835	15.3874	15.5862	15.8268	16.0869	16.255
71	332.9	15.8673	15.4031	15.6093	15.8594	16.1338	16.2987
70	333	15.8948	15.4078	15.6236	15.8865	16.1696	16.3577
69	333.1	15.9272	15.4108	15.6431	15.9195	16.2119	16.4082
68	333.2	15.958	15.417	15.6617	15.9534	16.2614	16.464
67	333.3	15.9899	15.4288	15.6862	15.9862	16.2975	16.5138
66	333.4	16.0225	15.4364	15.7028	16.0201	16.3513	16.5807
65	333.5	16.0565	15.4416	15.7153	16.0544	16.3948	16.6389
64	333.6	16.0888	15.4545	15.7314	16.089	16.442	16.6963
63	333.7	16.1255	15.474	15.753	16.1244	16.4892	16.7577
62	333.8	16.1595	15.4786	15.7672	16.1604	16.5435	16.8181
61	333.9	16.1968	15.4877	15.7856	16.2	16.5924	16.8863
60	334	16.2332	15.5	15.8077	16.2321	16.6463	16.9508
59	334.1	16.268	15.5152	15.8249	16.2678	16.6921	17.0125
58	334.2	16.306	15.5259	15.8434	16.3042	16.7503	17.0772
57	334.3	16.3448	15.5397	15.8602	16.3424	16.8033	17.1475
56	334.4	16.3844	15.5545	15.8809	16.3858	16.8604	17.2094
55	334.5	16.4231	15.5667	15.9018	16.4245	16.9148	17.2763
54	334.6	16.4632	15.5856	15.9256	16.4629	16.9703	17.3438
53	334.7	16.5058	15.6011	15.9457	16.5086	17.0347	17.4161
52	334.8	16.546	15.6188	15.9666	16.5495	17.0887	17.4733
51	334.9	16.589	15.6309	15.9891	16.5918	17.1546	17.5464
50	335	16.6308	15.6503	16.0118	16.6382	17.2136	17.6172
49	335.1	16.6728	15.664	16.031	16.6783	17.272	17.6788
48	335.2	16.7166	15.6828	16.055	16.7258	17.338	17.7483
47	335.3	16.7605	15.6977	16.0754	16.7713	17.4011	17.815
46	335.4	16.8052	15.7261	16.1005	16.8167	17.4627	17.8778
45	335.5	16.8532	15.7451	16.1265	16.8653	17.5341	17.9547
44	335.6	16.8985	15.7635	16.1486	16.9134	17.5969	18.0259
43	335.7	16.9443	15.7905	16.1759	16.9581	17.6596	18.0905
42	335.8	16.9932	15.8161	16.1965	17.0118	17.7275	18.1643
41	335.9	17.0416	15.8413	16.2283	17.059	17.7945	18.2378
40	336	17.0884	15.8665	16.2514	17.106	17.8603	18.3088
39	336.1	17.1384	15.8917	16.2816	17.1586	17.9285	18.3829
38	336.2	17.189	15.9112	16.3094	17.2117	17.9922	18.4453
37	336.3	17.2383	15.9451	16.3385	17.26	18.0601	18.5203
36	336.4	17.2879	15.9702	16.3672	17.3139	18.1258	18.5877
35	336.5	17.3383	15.9953	16.3916	17.3644	18.1949	18.6681
34	336.6	17.3884	16.019	16.4242	17.4157	18.262	18.7433
33	336.7	17.4428	16.0522	16.4656	17.4731	18.331	18.8044
32	336.8	17.4936	16.0746	16.4942	17.5245	18.3975	18.8863
31	336.9	17.5476	16.1081	16.522	17.5781	18.4705	18.9686
30	337	17.6011	16.1335	16.5616	17.6357	18.5411	19.0432
29	337.1	17.6533	16.1555	16.5901	17.6912	18.6072	19.1202
28	337.2	17.7097	16.1929	16.6292	17.7473	18.6818	19.2
27	337.3	17.7618	16.2169	16.6606	17.8037	18.75	19.2785
26	337.4	17.8181	16.2426	16.7004	17.8644	18.8204	19.3493
25	337.5	17.8718	16.2732	16.7354	17.9182	18.8911	19.4365
24	337.6	17.9278	16.3023	16.7714	17.9752	18.9643	19.5137
23	337.7	17.9831	16.3251	16.8063	18.0313	19.0344	19.5891
22	337.8	18.0408	16.3595	16.8475	18.094	19.1041	19.6685
21	337.9	18.0954	16.3862	16.8842	18.1482	19.1785	19.742
20	338	18.1507	16.4148	16.9226	18.2082	19.2444	19.8168
19	338.1	18.2105	16.4476	16.9688	18.2684	19.3184	19.8952
18	338.2	18.2674	16.4834	17.0073	18.3285	19.3929	19.9758
17	338.3	18.3242	16.5172	17.0447	18.3901	19.4587	20.0509
16	338.4	18.3829	16.5483	17.0912	18.4475	19.5367	20.1219
15	338.5	18.4393	16.5723	17.1257	18.5114	19.5983	20.2042
14	338.6	18.497	16.6096	17.1726	18.5643	19.6718	20.2835
13	338.7	18.5549	16.6381	17.2129	18.6249	19.7494	20.357
12	338.8	18.6132	16.6824	17.2487	18.6925	19.8149	20.4344
11	338.9	18.6707	16.7107	17.2932	18.7447	19.8884	20.5163
10	339	18.7287	16.7399	17.3356	18.8056	19.9647	20.6
9	339.1	18.7878	16.7721	17.3716	18.869	20.0364	20.6733
8	339.2	18.8471	16.8072	17.4167	18.9237	20.1135	20.7573
7	339.3	18.9047	16.8439	17.4593	18.9862	20.1828	20.837
6	339.4	18.959	16.8673	17.4922	19.039	20.2577	20.9051
5	339.5	19.0218	16.907	17.5452	19.1053	20.3311	20.99
4	339.6	19.0802	16.9503	17.5907	19.1575	20.4051	21.077
3	339.7	19.1381	16.9824	17.6281	19.2202	20.478	21.1549
2	339.8	19.1959	17.0108	17.6635	19.2752	20.5514	21.2306
1	339.9	19.2563	17.048	17.712	19.3365	20.6184	21.3138
0	340	19.312	17.0848	17.7497	19.3946	20.6885	21.3887

## Sheet: d11Bsw
	age	mean	5	16	50	84	95
750	265	26.5368	23.7304	24.7411	26.6389	28.2333	28.8283
749	265.1	26.5741	23.772	24.7828	26.6752	28.2586	28.8609
748	265.2	26.6104	23.8189	24.8309	26.7124	28.2924	28.8892
747	265.3	26.6456	23.8614	24.8623	26.7445	28.319	28.9216
746	265.4	26.68	23.9069	24.912	26.7776	28.347	28.9495
745	265.5	26.7134	23.9495	24.9458	26.8118	28.3712	28.976
744	265.6	26.7459	23.9919	24.9823	26.8445	28.4011	29.01
743	265.7	26.7774	24.0301	25.0235	26.8732	28.4269	29.0341
742	265.8	26.808	24.066	25.0523	26.9046	28.4497	29.0564
741	265.9	26.8378	24.1057	25.0926	26.9308	28.4741	29.082
740	266	26.8666	24.1389	25.1256	26.9604	28.4945	29.1103
739	266.1	26.8945	24.1752	25.1517	26.9902	28.5192	29.1356
738	266.2	26.9214	24.2076	25.1897	27.0106	28.5425	29.1533
737	266.3	26.9476	24.2439	25.2208	27.0367	28.5627	29.176
736	266.4	26.9728	24.2723	25.2449	27.0622	28.5805	29.2013
735	266.5	26.9971	24.3073	25.2716	27.0898	28.5967	29.2213
734	266.6	27.0205	24.3355	25.3082	27.1081	28.6202	29.2418
733	266.7	27.0431	24.3602	25.3285	27.1283	28.6451	29.2593
732	266.8	27.0648	24.3865	25.3494	27.1498	28.6569	29.2759
731	266.9	27.0857	24.4142	25.3762	27.1721	28.6744	29.2981
730	267	27.1058	24.4425	25.4069	27.1936	28.6885	29.3178
729	267.1	27.1251	24.4653	25.423	27.2111	28.7013	29.3321
728	267.2	27.1435	24.4854	25.4421	27.2243	28.7227	29.3459
727	267.3	27.1611	24.5138	25.4595	27.2434	28.7379	29.3629
726	267.4	27.178	24.5304	25.4831	27.261	28.753	29.3742
725	267.5	27.194	24.5523	25.5076	27.2774	28.7624	29.3852
724	267.6	27.2093	24.5721	25.522	27.2936	28.7776	29.4046
723	267.7	27.2239	24.5874	25.5365	27.3066	28.7856	29.4178
722	267.8	27.2377	24.613	25.5484	27.3164	28.7958	29.4297
721	267.9	27.2509	24.6198	25.5665	27.3315	28.8062	29.4408
720	268	27.2633	24.6385	25.5831	27.3429	28.8191	29.4517
719	268.1	27.2749	24.6543	25.6	27.3554	28.8306	29.4605
718	268.2	27.2859	24.6663	25.6129	27.368	28.8422	29.4707
717	268.3	27.2963	24.6819	25.6224	27.3771	28.85	29.4769
716	268.4	27.306	24.6969	25.6325	27.3874	28.8568	29.4875
715	268.5	27.3151	24.7048	25.6399	27.3954	28.8638	29.4941
714	268.6	27.3235	24.7148	25.6481	27.4014	28.872	29.5014
713	268.7	27.3313	24.7217	25.6577	27.4086	28.8786	29.5083
712	268.8	27.3386	24.7355	25.6685	27.4154	28.8832	29.5129
711	268.9	27.3453	24.7419	25.6796	27.4229	28.8892	29.5204
710	269	27.3513	24.75	25.6865	27.4278	28.8924	29.5275
709	269.1	27.3569	24.759	25.6937	27.4329	28.8972	29.5338
708	269.2	27.362	24.7635	25.7012	27.4374	28.9024	29.5385
707	269.3	27.3665	24.7692	25.7048	27.4424	28.9042	29.5419
706	269.4	27.3706	24.7762	25.7121	27.4466	28.9072	29.5469
705	269.5	27.3741	24.778	25.714	27.4511	28.9101	29.549
704	269.6	27.3772	24.7854	25.7173	27.4536	28.9132	29.5521
703	269.7	27.3798	24.7907	25.7199	27.4565	28.9145	29.5541
702	269.8	27.3821	24.7938	25.7229	27.4598	28.9161	29.5559
701	269.9	27.3839	24.7969	25.7235	27.461	28.9174	29.5569
700	270	27.3853	24.7969	25.7262	27.4624	28.9188	29.5572
699	270.1	27.3864	24.798	25.7272	27.463	28.9194	29.5588
698	270.2	27.3871	24.798	25.7279	27.4633	28.9212	29.5593
697	270.3	27.3875	24.798	25.7279	27.464	28.9216	29.5593
696	270.4	27.3875	24.798	25.7279	27.464	28.9216	29.5593
695	270.5	27.3873	24.798	25.7279	27.4637	28.9212	29.5593
694	270.6	27.3867	24.798	25.7272	27.4633	28.9205	29.5588
693	270.7	27.3859	24.7979	25.7272	27.4627	28.9188	29.5588
692	270.8	27.3848	24.7969	25.7251	27.4623	28.9181	29.5569
691	270.9	27.3835	24.7959	25.7231	27.461	28.9174	29.5566
690	271	27.382	24.7938	25.7225	27.4595	28.9161	29.5559
689	271.1	27.3802	24.7927	25.72	27.4568	28.9149	29.5545
688	271.2	27.3783	24.7876	25.7192	27.4548	28.9142	29.5524
687	271.3	27.3762	24.7835	25.7152	27.4536	28.9126	29.5507
686	271.4	27.374	24.778	25.714	27.4511	28.9101	29.549
685	271.5	27.3717	24.7765	25.7126	27.4489	28.9078	29.5473
684	271.6	27.3692	24.774	25.7099	27.4451	28.9066	29.5458
683	271.7	27.3666	24.7692	25.7054	27.4424	28.9042	29.5423
682	271.8	27.3639	24.766	25.703	27.4398	28.903	29.5403
681	271.9	27.3613	24.7635	25.7	27.437	28.9024	29.537
680	272	27.3585	24.7604	25.6957	27.4346	28.8991	29.5354
679	272.1	27.3556	24.7571	25.6899	27.4322	28.8962	29.5314
678	272.2	27.3528	24.7532	25.6866	27.4288	28.8934	29.5283
677	272.3	27.3499	24.7482	25.6851	27.4259	28.8917	29.5263
676	272.4	27.347	24.7439	25.6815	27.4245	28.8902	29.5221
675	272.5	27.3442	24.7415	25.6785	27.4217	28.8891	29.5196
674	272.6	27.3414	24.7377	25.675	27.419	28.8862	29.5178
673	272.7	27.3386	24.7355	25.6685	27.4154	28.8832	29.5129
672	272.8	27.3359	24.7302	25.6644	27.4145	28.8814	29.5121
671	272.9	27.3334	24.7243	25.6613	27.4103	28.8801	29.5118
670	273	27.3308	24.7217	25.6573	27.4077	28.8784	29.5077
669	273.1	27.3284	24.719	25.6538	27.405	28.8772	29.5057
668	273.2	27.3261	24.7183	25.6506	27.4045	28.8738	29.5029
667	273.3	27.3239	24.715	25.6494	27.4014	28.8721	29.5014
666	273.4	27.3219	24.7131	25.6465	27.4005	28.8706	29.5
665	273.5	27.3199	24.7119	25.6436	27.3988	28.8688	29.5
664	273.6	27.3182	24.7102	25.6428	27.3976	28.8665	29.4962
663	273.7	27.3167	24.7085	25.6418	27.3967	28.8649	29.4948
662	273.8	27.3153	24.7049	25.6405	27.3955	28.864	29.4941
661	273.9	27.314	24.7037	25.6391	27.3946	28.8631	29.4928
660	274	27.313	24.7019	25.6383	27.3929	28.8626	29.4922
659	274.1	27.3122	24.7009	25.6373	27.3928	28.8622	29.4921
658	274.2	27.3116	24.7009	25.6366	27.3924	28.8616	29.4921
657	274.3	27.3112	24.7009	25.6366	27.3916	28.8611	29.4921
656	274.4	27.3111	24.7009	25.6366	27.3912	28.8611	29.4921
655	274.5	27.3112	24.7009	25.6366	27.3912	28.8611	29.4921
654	274.6	27.3116	24.7009	25.6366	27.3924	28.8616	29.4921
653	274.7	27.3122	24.7009	25.6373	27.3928	28.8622	29.4921
652	274.8	27.3131	24.7019	25.6383	27.3929	28.8626	29.4922
651	274.9	27.3142	24.7047	25.6391	27.3946	28.8631	29.4928
650	275	27.3157	24.7058	25.6408	27.3963	28.864	29.4941
649	275.1	27.3173	24.7102	25.6423	27.3968	28.8658	29.4949
648	275.2	27.3192	24.7103	25.6433	27.3984	28.8679	29.4968
647	275.3	27.3215	24.7131	25.6449	27.4	28.8693	29.5
646	275.4	27.324	24.715	25.6494	27.4018	28.8721	29.5014
645	275.5	27.3268	24.7185	25.6513	27.4045	28.8753	29.5036
644	275.6	27.3299	24.7198	25.657	27.4068	28.8779	29.507
643	275.7	27.3333	24.7243	25.6613	27.4099	28.8801	29.5112
642	275.8	27.337	24.7317	25.6647	27.4146	28.8822	29.5121
641	275.9	27.341	24.7377	25.6735	27.4186	28.8858	29.5167
640	276	27.3453	24.7419	25.6796	27.4229	28.8892	29.5204
639	276.1	27.3498	24.7477	25.6851	27.4259	28.8917	29.5263
638	276.2	27.3547	24.7556	25.6892	27.4314	28.8958	29.5309
637	276.3	27.36	24.761	25.6993	27.4364	28.9	29.5366
636	276.4	27.3654	24.7679	25.7042	27.4414	28.9036	29.5416
635	276.5	27.3712	24.7765	25.7126	27.448	28.9073	29.5473
634	276.6	27.3772	24.7854	25.7178	27.4536	28.9132	29.5521
633	276.7	27.3836	24.7959	25.7235	27.461	28.9174	29.5566
632	276.8	27.3903	24.8009	25.7296	27.4684	28.9241	29.5628
631	276.9	27.3973	24.8067	25.7364	27.4762	28.9309	29.5693
630	277	27.4045	24.8159	25.7433	27.4833	28.9367	29.5759
629	277.1	27.412	24.8257	25.7506	27.4903	28.9449	29.581
628	277.2	27.4198	24.8365	25.7597	27.4972	28.952	29.5868
627	277.3	27.4278	24.8477	25.7741	27.5045	28.9584	29.5936
626	277.4	27.4362	24.8598	25.7851	27.5128	28.9672	29.5988
625	277.5	27.4448	24.8682	25.7958	27.5183	28.9746	29.6052
624	277.6	27.4537	24.882	25.8064	27.5273	28.9807	29.6126
623	277.7	27.4629	24.8968	25.817	27.5363	28.9902	29.625
622	277.8	27.4722	24.9009	25.8233	27.5464	28.9966	29.6355
621	277.9	27.4819	24.9153	25.8335	27.5558	29.0018	29.6431
620	278	27.4918	24.9265	25.8456	27.5646	29.0098	29.65
619	278.1	27.5019	24.9406	25.8568	27.5763	29.0177	29.6612
618	278.2	27.5122	24.9541	25.8709	27.5879	29.0241	29.6721
617	278.3	27.5229	24.9682	25.8867	27.5977	29.0347	29.6793
616	278.4	27.5336	24.9824	25.8993	27.6084	29.0457	29.6863
615	278.5	27.5446	24.997	25.91	27.6149	29.0562	29.693
614	278.6	27.5559	25.0087	25.9216	27.6275	29.0674	29.7061
613	278.7	27.5672	25.0235	25.9319	27.6379	29.0776	29.7181
612	278.8	27.5788	25.0384	25.9461	27.6496	29.0882	29.7244
611	278.9	27.5906	25.0522	25.9612	27.6619	29.0975	29.7346
610	279	27.6024	25.0673	25.9768	27.6743	29.1045	29.7472
609	279.1	27.6146	25.084	25.9932	27.6878	29.1125	29.76
608	279.2	27.6268	25.1016	26.0073	27.6978	29.1218	29.7722
607	279.3	27.6392	25.1124	26.0187	27.7064	29.1324	29.7804
606	279.4	27.6518	25.1319	26.0294	27.722	29.1451	29.7903
605	279.5	27.6645	25.1459	26.0455	27.7319	29.1591	29.8016
604	279.6	27.6774	25.1607	26.0627	27.7476	29.1717	29.8133
603	279.7	27.6903	25.1768	26.08	27.7605	29.1821	29.8246
602	279.8	27.7034	25.1969	26.0952	27.7726	29.1896	29.8341
601	279.9	27.7165	25.2153	26.1097	27.7867	29.2005	29.8453
600	280	27.7298	25.2281	26.1224	27.7967	29.2123	29.8624
599	280.1	27.7431	25.247	26.1362	27.81	29.2207	29.8731
598	280.2	27.7565	25.2596	26.151	27.8209	29.2352	29.8839
597	280.3	27.77	25.2777	26.169	27.8365	29.2452	29.896
596	280.4	27.7836	25.296	26.1845	27.8519	29.2569	29.9099
595	280.5	27.7971	25.3169	26.2029	27.8668	29.2707	29.9185
594	280.6	27.8109	25.3303	26.216	27.8791	29.2825	29.9313
593	280.7	27.8246	25.3487	26.2307	27.8899	29.2928	29.9448
592	280.8	27.8384	25.3645	26.2439	27.9004	29.3043	29.9561
591	280.9	27.8521	25.3806	26.2615	27.9157	29.3157	29.9676
590	281	27.866	25.404	26.2811	27.9296	29.324	29.9806
589	281.1	27.8798	25.4203	26.2954	27.9455	29.338	29.9908
588	281.2	27.8937	25.4347	26.3111	27.9606	29.3489	30.004
587	281.3	27.9075	25.4526	26.3286	27.9729	29.3647	30.0188
586	281.4	27.9214	25.4664	26.3396	27.9855	29.3763	30.0309
585	281.5	27.9352	25.4913	26.3575	27.9974	29.3898	30.0434
584	281.6	27.949	25.5105	26.3755	28.0087	29.3995	30.0547
583	281.7	27.9629	25.5228	26.3919	28.0265	29.4098	30.0669
582	281.8	27.9767	25.5376	26.4073	28.0418	29.4197	30.0782
581	281.9	27.9904	25.5548	26.4243	28.0541	29.4317	30.0872
580	282	28.0042	25.5725	26.437	28.0679	29.4431	30.1032
579	282.1	28.018	25.599	26.4532	28.0802	29.456	30.1151
578	282.2	28.0316	25.6132	26.4697	28.0915	29.4698	30.1307
577	282.3	28.0453	25.627	26.486	28.1021	29.4844	30.1417
576	282.4	28.059	25.639	26.5018	28.1201	29.4949	30.1521
575	282.5	28.0725	25.6609	26.5174	28.136	29.5065	30.165
574	282.6	28.0861	25.6787	26.5313	28.1505	29.514	30.1748
573	282.7	28.0995	25.7	26.5472	28.1611	29.5262	30.1861
572	282.8	28.1129	25.7144	26.561	28.1733	29.5373	30.1993
571	282.9	28.1263	25.7283	26.5797	28.1856	29.5492	30.2122
570	283	28.1396	25.7414	26.5917	28.195	29.5617	30.2261
569	283.1	28.1529	25.7633	26.6093	28.2107	29.5755	30.237
568	283.2	28.1661	25.7781	26.6235	28.2276	29.5866	30.2486
567	283.3	28.1793	25.7981	26.6373	28.2413	29.5973	30.2583
566	283.4	28.1924	25.8134	26.6525	28.2527	29.6072	30.2691
565	283.5	28.2054	25.8287	26.6682	28.2639	29.6189	30.2822
564	283.6	28.2185	25.8429	26.6829	28.2765	29.6287	30.2951
563	283.7	28.2315	25.8623	26.7012	28.2872	29.6378	30.3053
562	283.8	28.2444	25.8779	26.7145	28.3	29.6537	30.3188
561	283.9	28.2572	25.8971	26.7287	28.3137	29.6662	30.3309
560	284	28.2702	25.9109	26.7418	28.3303	29.6799	30.3412
559	284.1	28.283	25.9229	26.7552	28.3429	29.6889	30.35
558	284.2	28.2957	25.9421	26.7713	28.3536	29.6982	30.3598
557	284.3	28.3085	25.96	26.7869	28.3641	29.7057	30.3731
556	284.4	28.3212	25.9776	26.8023	28.3782	29.7183	30.3862
555	284.5	28.3339	25.9925	26.816	28.3904	29.7285	30.3993
554	284.6	28.3466	26.0053	26.8304	28.3994	29.7398	30.4118
553	284.7	28.3593	26.0202	26.8423	28.4154	29.7537	30.4229
552	284.8	28.372	26.0365	26.8576	28.4299	29.7659	30.4331
551	284.9	28.3847	26.0545	26.8742	28.4412	29.7772	30.4402
550	285	28.3974	26.0748	26.8889	28.453	29.7881	30.4508
549	285.1	28.4101	26.0903	26.9024	28.4637	29.7987	30.4615
548	285.2	28.4228	26.103	26.9172	28.4782	29.81	30.4746
547	285.3	28.4356	26.1156	26.9323	28.4897	29.8181	30.4864
546	285.4	28.4484	26.1319	26.9452	28.5043	29.8282	30.5045
545	285.5	28.4612	26.1527	26.9613	28.5181	29.842	30.5159
544	285.6	28.474	26.1714	26.975	28.528	29.8535	30.5237
543	285.7	28.487	26.1898	26.9881	28.543	29.8628	30.5341
542	285.8	28.4999	26.2022	27.0061	28.5559	29.8768	30.545
541	285.9	28.5131	26.2133	27.0188	28.5671	29.8919	30.5523
540	286	28.5262	26.227	27.0352	28.5796	29.9	30.569
539	286.1	28.5395	26.2487	27.0515	28.593	29.9126	30.5774
538	286.2	28.5529	26.2707	27.0681	28.6062	29.9235	30.5927
537	286.3	28.5664	26.2906	27.0807	28.6209	29.9342	30.6073
536	286.4	28.58	26.3022	27.0946	28.6344	29.9445	30.621
535	286.5	28.5937	26.3146	27.1115	28.6482	29.9561	30.6306
534	286.6	28.6076	26.333	27.1286	28.6614	29.9716	30.6429
533	286.7	28.6216	26.3505	27.1431	28.6745	29.9863	30.6545
532	286.8	28.6358	26.3707	27.1636	28.6878	29.9981	30.6642
531	286.9	28.6501	26.3929	27.1778	28.7007	30.0096	30.6767
530	287	28.6646	26.4068	27.1927	28.7179	30.0214	30.6955
529	287.1	28.6794	26.4246	27.2086	28.7328	30.0327	30.7043
528	287.2	28.6942	26.4417	27.2255	28.7483	30.0449	30.7186
527	287.3	28.7094	26.4621	27.2466	28.7606	30.0613	30.7345
526	287.4	28.7248	26.4867	27.2658	28.7759	30.0751	30.7508
525	287.5	28.7403	26.5014	27.2805	28.7916	30.0877	30.7626
524	287.6	28.7562	26.523	27.2965	28.8093	30.1	30.775
523	287.7	28.7722	26.5373	27.3156	28.8249	30.1152	30.7886
522	287.8	28.7886	26.5619	27.3361	28.8384	30.1297	30.8073
521	287.9	28.8052	26.5851	27.3568	28.8564	30.1458	30.8191
520	288	28.822	26.6093	27.3774	28.8748	30.1561	30.836
519	288.1	28.8391	26.6248	27.3929	28.8898	30.1729	30.85
518	288.2	28.8566	26.647	27.4133	28.9065	30.1905	30.8694
517	288.3	28.8744	26.6679	27.4342	28.924	30.2043	30.8837
516	288.4	28.8925	26.6979	27.4581	28.942	30.2185	30.8991
515	288.5	28.9109	26.7191	27.4764	28.9614	30.2356	30.9174
514	288.6	28.9296	26.7368	27.4966	28.9822	30.2529	30.9322
513	288.7	28.9487	26.7603	27.52	28.9997	30.27	30.9471
512	288.8	28.9681	26.7907	27.5445	29.0186	30.2892	30.9664
511	288.9	28.9879	26.8147	27.5682	29.037	30.301	30.9889
510	289	29.008	26.8361	27.5898	29.0551	30.3194	31.005
509	289.1	29.0286	26.8616	27.6104	29.0799	30.339	31.0221
508	289.2	29.0495	26.8901	27.6378	29.0997	30.3586	31.0394
507	289.3	29.0708	26.9188	27.6641	29.1213	30.3788	31.0566
506	289.4	29.0925	26.9406	27.6851	29.1398	30.3937	31.0794
505	289.5	29.1145	26.9724	27.7073	29.1608	30.4136	31.1017
504	289.6	29.137	26.9991	27.7351	29.1849	30.4344	31.1202
503	289.7	29.1599	27.0282	27.7682	29.208	30.459	31.1374
502	289.8	29.1831	27.0549	27.7923	29.2319	30.478	31.1588
501	289.9	29.2069	27.0874	27.8191	29.2525	30.4977	31.1835
500	290	29.2311	27.1164	27.842	29.2768	30.5205	31.2035
499	290.1	29.2557	27.1453	27.876	29.3037	30.5428	31.2226
498	290.2	29.2806	27.1777	27.9021	29.3281	30.5667	31.2446
497	290.3	29.306	27.2113	27.93	29.3504	30.5865	31.2705
496	290.4	29.3319	27.2393	27.9615	29.3775	30.6127	31.2955
495	290.5	29.3582	27.2748	27.9926	29.4047	30.6365	31.315
494	290.6	29.3849	27.3098	28.0205	29.4306	30.657	31.3351
493	290.7	29.4121	27.3378	28.0508	29.4555	30.686	31.3657
492	290.8	29.4397	27.3756	28.0846	29.4832	30.7108	31.3876
491	290.9	29.4678	27.4121	28.1159	29.5116	30.7361	31.4107
490	291	29.4964	27.4444	28.1475	29.5404	30.7606	31.4393
489	291.1	29.5252	27.4787	28.1838	29.5649	30.7855	31.4651
488	291.2	29.5546	27.519	28.213	29.598	30.8161	31.4889
487	291.3	29.5845	27.5533	28.2469	29.6275	30.8402	31.5176
486	291.4	29.6146	27.5902	28.2856	29.655	30.8682	31.5437
485	291.5	29.6453	27.6336	28.3183	29.684	30.8949	31.575
484	291.6	29.6764	27.668	28.349	29.7179	30.9238	31.5972
483	291.7	29.708	27.7079	28.3902	29.7466	30.9536	31.625
482	291.8	29.7399	27.7463	28.4243	29.7779	30.9807	31.6573
481	291.9	29.7722	27.7849	28.4581	29.8111	31.0047	31.6849
480	292	29.805	27.8283	28.5025	29.8442	31.0431	31.7147
479	292.1	29.8381	27.8644	28.532	29.8755	31.0703	31.7443
478	292.2	29.8717	27.9093	28.5714	29.9083	31.0947	31.772
477	292.3	29.9056	27.9504	28.6147	29.942	31.1306	31.8032
476	292.4	29.9399	27.9887	28.6466	29.9756	31.1653	31.837
475	292.5	29.9747	28.0369	28.6888	30.0078	31.1896	31.8641
474	292.6	30.0097	28.0741	28.7277	30.0453	31.2269	31.899
473	292.7	30.0451	28.1203	28.7647	30.0771	31.2609	31.9293
472	292.8	30.0809	28.1614	28.8064	30.1131	31.2908	31.9624
471	292.9	30.117	28.2063	28.8449	30.1489	31.3277	31.9932
470	293	30.1534	28.2518	28.8866	30.1807	31.3588	32.0269
469	293.1	30.1902	28.3	28.9283	30.2219	31.3937	32.0604
468	293.2	30.2273	28.3408	28.9683	30.2521	31.4283	32.0916
467	293.3	30.2646	28.3896	29.0171	30.2906	31.4621	32.13
466	293.4	30.3022	28.4328	29.0515	30.3278	31.4988	32.1656
465	293.5	30.3401	28.4828	29.097	30.3637	31.5344	32.1896
464	293.6	30.3782	28.5248	29.1372	30.4013	31.5723	32.2359
463	293.7	30.4167	28.577	29.182	30.4364	31.6042	32.2735
462	293.8	30.4554	28.6205	29.2228	30.4742	31.6429	32.3
461	293.9	30.4941	28.669	29.2671	30.5131	31.6803	32.3473
460	294	30.5333	28.7147	29.3093	30.545	31.7138	32.3777
459	294.1	30.5725	28.7624	29.3545	30.5847	31.7563	32.4193
458	294.2	30.6119	28.8119	29.3987	30.6242	31.7904	32.4592
457	294.3	30.6515	28.8557	29.4372	30.6581	31.829	32.496
456	294.4	30.6913	28.9089	29.4848	30.6958	31.8692	32.5337
455	294.5	30.7311	28.9531	29.5248	30.7328	31.9048	32.575
454	294.6	30.7711	29.0038	29.5723	30.7703	31.9437	32.6094
453	294.7	30.8112	29.049	29.6143	30.8084	31.9788	32.6534
452	294.8	30.8513	29.1012	29.6619	30.8457	32.0149	32.6918
451	294.9	30.8915	29.1443	29.7043	30.8825	32.0563	32.7317
450	295	30.9318	29.1955	29.7511	30.9211	32.0924	32.7707
449	295.1	30.9721	29.2409	29.7919	30.9598	32.1351	32.8084
448	295.2	31.0124	29.2873	29.8392	30.995	32.1696	32.8506
447	295.3	31.0528	29.3353	29.8845	31.0317	32.2092	32.8913
446	295.4	31.0931	29.3836	29.9294	31.0711	32.249	32.928
445	295.5	31.1334	29.4311	29.9702	31.1109	32.28	32.9741
444	295.6	31.1736	29.4815	30.0198	31.1447	32.3234	33.0094
443	295.7	31.2137	29.5245	30.057	31.1866	32.3625	33.0532
442	295.8	31.2537	29.5768	30.1038	31.22	32.3975	33.0908
441	295.9	31.2938	29.6163	30.1462	31.2564	32.4384	33.1317
440	296	31.3336	29.6688	30.1874	31.2969	32.4754	33.1732
439	296.1	31.3733	29.7109	30.2325	31.3322	32.5136	33.2064
438	296.2	31.4129	29.759	30.2767	31.3686	32.5502	33.2544
437	296.3	31.4524	29.8038	30.3187	31.4062	32.5894	33.2894
436	296.4	31.4915	29.8474	30.3645	31.4382	32.627	33.3329
435	296.5	31.5305	29.8963	30.4024	31.4762	32.6613	33.3738
434	296.6	31.5693	29.9384	30.4476	31.5129	32.6991	33.4063
433	296.7	31.6079	29.9858	30.487	31.5466	32.7383	33.4487
432	296.8	31.6461	30.0273	30.5319	31.5843	32.7726	33.4893
431	296.9	31.6843	30.0727	30.5696	31.6176	32.8097	33.5237
430	297	31.722	30.1154	30.6159	31.651	32.8451	33.5667
429	297.1	31.7595	30.1611	30.6554	31.6866	32.8805	33.606
428	297.2	31.7966	30.2026	30.6951	31.7204	32.9162	33.6417
427	297.3	31.8335	30.2398	30.7333	31.7559	32.9506	33.6831
426	297.4	31.8699	30.2875	30.7767	31.7876	32.9864	33.7175
425	297.5	31.9061	30.3246	30.8123	31.8222	33.0199	33.7558
424	297.6	31.9418	30.3697	30.8556	31.8564	33.0509	33.791
423	297.7	31.9772	30.4086	30.8949	31.8865	33.0907	33.8267
422	297.8	32.0122	30.4452	30.9315	31.9228	33.1181	33.8674
421	297.9	32.0467	30.4902	30.9691	31.9529	33.1532	33.8967
420	298	32.0809	30.5212	31.0069	31.9849	33.1866	33.9356
419	298.1	32.1146	30.5653	31.0434	32.0155	33.2189	33.9734
418	298.2	32.1479	30.6012	31.0788	32.049	33.2475	34.0061
417	298.3	32.1807	30.6341	31.1138	32.0792	33.2766	34.0402
416	298.4	32.213	30.6737	31.1505	32.108	33.3161	34.0771
415	298.5	32.2449	30.7083	31.1831	32.1403	33.3417	34.1043
414	298.6	32.2763	30.7437	31.2165	32.1684	33.37	34.1396
413	298.7	32.3071	30.7759	31.248	32.1955	33.4045	34.1763
412	298.8	32.3375	30.8066	31.2845	32.226	33.4323	34.2031
411	298.9	32.3673	30.8419	31.316	32.2558	33.4591	34.236
410	299	32.3966	30.8759	31.3448	32.2824	33.4905	34.2685
409	299.1	32.4254	30.9039	31.3766	32.31	33.5194	34.297
408	299.2	32.4537	30.9359	31.4062	32.3386	33.5431	34.3253
407	299.3	32.4814	30.9669	31.4346	32.363	33.5716	34.3564
406	299.4	32.5085	30.9948	31.4649	32.3901	33.6029	34.3842
405	299.5	32.5351	31.0263	31.4907	32.4153	33.6239	34.4108
404	299.6	32.5612	31.0503	31.518	32.4401	33.6529	34.4396
403	299.7	32.5867	31.085	31.5449	32.4636	33.6761	34.4676
402	299.8	32.6116	31.1123	31.5741	32.489	33.7021	34.4946
401	299.9	32.6359	31.1312	31.6003	32.5123	33.7267	34.5146
400	300	32.6596	31.1609	31.6207	32.5335	33.7472	34.5434
399	300.1	32.6828	31.1913	31.6457	32.5553	33.7727	34.5667
398	300.2	32.7054	31.2133	31.6696	32.5772	33.794	34.5885
397	300.3	32.7274	31.233	31.6977	32.6	33.8168	34.6154
396	300.4	32.7489	31.2539	31.7163	32.6222	33.8377	34.637
395	300.5	32.7697	31.2792	31.7379	32.6403	33.8583	34.6588
394	300.6	32.79	31.3031	31.7579	32.6587	33.8816	34.6796
393	300.7	32.8096	31.3247	31.7781	32.6792	33.8988	34.7009
392	300.8	32.8288	31.3421	31.8003	32.6959	33.9158	34.7222
391	300.9	32.8473	31.3589	31.8213	32.7136	33.9376	34.7426
390	301	32.8653	31.38	31.8376	32.7333	33.9558	34.7596
389	301.1	32.8826	31.3988	31.8546	32.7516	33.9759	34.7741
388	301.2	32.8994	31.4225	31.8721	32.7693	33.9917	34.7913
387	301.3	32.9157	31.4366	31.8864	32.7819	34.0041	34.8087
386	301.4	32.9313	31.45	31.9073	32.7951	34.0174	34.8322
385	301.5	32.9466	31.4658	31.9222	32.8103	34.0362	34.8487
384	301.6	32.9611	31.4791	31.9355	32.8245	34.0518	34.8617
383	301.7	32.9751	31.4939	31.95	32.8396	34.0669	34.8706
382	301.8	32.9887	31.5124	31.9642	32.8551	34.0842	34.8822
381	301.9	33.0016	31.5281	31.9783	32.8675	34.0953	34.8981
380	302	33.0141	31.5426	31.9895	32.8805	34.1054	34.9181
379	302.1	33.026	31.5526	32.0016	32.892	34.1153	34.9296
378	302.2	33.0375	31.563	32.0146	32.9022	34.1282	34.9416
377	302.3	33.0484	31.5749	32.0257	32.9137	34.1409	34.9546
376	302.4	33.0588	31.5862	32.0363	32.9221	34.1527	34.9657
375	302.5	33.0688	31.5967	32.0459	32.9321	34.1639	34.971
374	302.6	33.0783	31.6061	32.0566	32.9422	34.1748	34.978
373	302.7	33.0874	31.6152	32.0666	32.9507	34.1852	34.9858
372	302.8	33.0959	31.6252	32.0754	32.9594	34.1909	34.9963
371	302.9	33.1041	31.6345	32.0855	32.9692	34.1966	35.0104
370	303	33.1118	31.643	32.0919	32.9776	34.2038	35.0237
369	303.1	33.1192	31.6515	32.096	32.9832	34.2119	35.0273
368	303.2	33.126	31.6575	32.104	32.9904	34.2194	35.0357
367	303.3	33.1325	31.665	32.1123	32.9971	34.2252	35.0398
366	303.4	33.1386	31.6714	32.1175	33.002	34.2311	35.0473
365	303.5	33.1444	31.6799	32.1244	33.0094	34.2419	35.0536
364	303.6	33.1498	31.6847	32.1289	33.014	34.2465	35.0598
363	303.7	33.1549	31.6874	32.134	33.0197	34.2532	35.0657
362	303.8	33.1596	31.6909	32.1403	33.024	34.258	35.0667
361	303.9	33.164	31.6968	32.1439	33.0293	34.2623	35.0709
360	304	33.1681	31.7018	32.1479	33.0327	34.2673	35.075
359	304.1	33.1719	31.7055	32.151	33.0372	34.2701	35.0793
358	304.2	33.1754	31.7096	32.1556	33.0403	34.2726	35.0817
357	304.3	33.1787	31.7128	32.1579	33.0438	34.2776	35.0867
356	304.4	33.1818	31.715	32.1602	33.0473	34.283	35.0888
355	304.5	33.1845	31.7178	32.1633	33.0496	34.285	35.0923
354	304.6	33.1871	31.7202	32.1653	33.0525	34.2871	35.0981
353	304.7	33.1895	31.7229	32.1684	33.0548	34.2874	35.099
352	304.8	33.1916	31.7241	32.1708	33.0564	34.2883	35.1008
351	304.9	33.1936	31.7278	32.1725	33.0576	34.29	35.1035
350	305	33.1954	31.7289	32.1739	33.0597	34.2919	35.1078
349	305.1	33.197	31.7292	32.1752	33.0612	34.2958	35.1094
348	305.2	33.1985	31.7305	32.1771	33.0632	34.2965	35.1103
347	305.3	33.1999	31.732	32.1787	33.0644	34.2973	35.1121
346	305.4	33.2011	31.7327	32.1795	33.0657	34.2987	35.1121
345	305.5	33.2023	31.7345	32.1815	33.0666	34.2993	35.1128
344	305.6	33.2033	31.7353	32.1821	33.0677	34.3006	35.1129
343	305.7	33.2043	31.7365	32.1834	33.069	34.3018	35.114
342	305.8	33.2053	31.7385	32.1846	33.0702	34.3042	35.1157
341	305.9	33.2061	31.7389	32.1853	33.0708	34.3042	35.1164
340	306	33.2069	31.7401	32.186	33.0718	34.3043	35.1164
339	306.1	33.2077	31.7408	32.1867	33.0722	34.3043	35.1181
338	306.2	33.2084	31.7421	32.1868	33.0729	34.3049	35.1191
337	306.3	33.2092	31.7428	32.1881	33.0736	34.305	35.1198
336	306.4	33.2099	31.7428	32.1887	33.0745	34.3051	35.1205
335	306.5	33.2107	31.744	32.1894	33.0747	34.3057	35.1207
334	306.6	33.2115	31.7445	32.1907	33.0755	34.3065	35.1231
333	306.7	33.2124	31.7455	32.1908	33.0767	34.3083	35.1244
332	306.8	33.2132	31.7468	32.1912	33.0775	34.3084	35.1244
331	306.9	33.2141	31.7484	32.1928	33.0792	34.3085	35.1254
330	307	33.2152	31.7495	32.1947	33.0801	34.3098	35.1265
329	307.1	33.2163	31.7503	32.1967	33.0809	34.3105	35.1287
328	307.2	33.2175	31.7537	32.198	33.0822	34.3106	35.1301
327	307.3	33.2187	31.755	32.2	33.0833	34.3112	35.1313
326	307.4	33.22	31.7559	32.2019	33.0845	34.3127	35.133
325	307.5	33.2214	31.7571	32.2032	33.0865	34.3142	35.1342
324	307.6	33.2229	31.759	32.2042	33.0884	34.3179	35.1358
323	307.7	33.2246	31.7622	32.2056	33.0903	34.3195	35.1376
322	307.8	33.2265	31.7635	32.2079	33.0912	34.3222	35.1402
321	307.9	33.2285	31.7667	32.2099	33.0931	34.3238	35.1402
320	308	33.2305	31.7674	32.2119	33.095	34.3263	35.1429
319	308.1	33.2326	31.7691	32.2143	33.0977	34.3303	35.1432
318	308.2	33.235	31.7723	32.2164	33.1004	34.3355	35.1455
317	308.3	33.2375	31.7734	32.219	33.1021	34.3381	35.1477
316	308.4	33.2402	31.7777	32.223	33.1046	34.3404	35.1514
315	308.5	33.2429	31.7801	32.2271	33.1078	34.3419	35.156
314	308.6	33.2459	31.7841	32.23	33.1122	34.3454	35.16
313	308.7	33.2491	31.7877	32.2338	33.1155	34.3503	35.1611
312	308.8	33.2523	31.7892	32.2357	33.1185	34.3529	35.1657
311	308.9	33.2557	31.7928	32.2396	33.1226	34.3571	35.1709
310	309	33.2594	31.7983	32.2426	33.1265	34.3623	35.1727
309	309.1	33.2631	31.8028	32.2457	33.13	34.3648	35.1766
308	309.2	33.2671	31.809	32.2492	33.1327	34.3688	35.1796
307	309.3	33.2711	31.8131	32.2525	33.1368	34.3725	35.1862
306	309.4	33.2754	31.8153	32.2571	33.1421	34.3796	35.19
305	309.5	33.2798	31.8178	32.2605	33.1453	34.3824	35.1972
304	309.6	33.2844	31.8211	32.2642	33.1495	34.389	35.2008
303	309.7	33.2891	31.825	32.2696	33.154	34.3907	35.2073
302	309.8	33.294	31.8316	32.2731	33.1584	34.3966	35.2111
301	309.9	33.299	31.8379	32.2775	33.1632	34.3986	35.2136
300	310	33.3042	31.8423	32.2825	33.1686	34.4037	35.2179
299	310.1	33.3095	31.8484	32.2875	33.1736	34.4088	35.2233
298	310.2	33.315	31.855	32.2931	33.179	34.414	35.2283
297	310.3	33.3206	31.859	32.2987	33.1852	34.42	35.2346
296	310.4	33.3263	31.8645	32.3053	33.1917	34.4282	35.2423
295	310.5	33.3321	31.8711	32.3125	33.2002	34.4338	35.2464
294	310.6	33.3381	31.8756	32.3209	33.2056	34.4393	35.2559
293	310.7	33.3441	31.8817	32.3268	33.2124	34.4493	35.2613
292	310.8	33.3503	31.8876	32.333	33.2191	34.4543	35.2725
291	310.9	33.3565	31.8977	32.3407	33.2245	34.4603	35.2791
290	311	33.3629	31.9045	32.3464	33.231	34.4687	35.2843
289	311.1	33.3694	31.9127	32.3529	33.2372	34.4745	35.2927
288	311.2	33.3759	31.9204	32.3606	33.2431	34.4829	35.2973
287	311.3	33.3825	31.9247	32.3672	33.25	34.4906	35.3047
286	311.4	33.389	31.9314	32.3729	33.2547	34.498	35.3091
285	311.5	33.3957	31.9389	32.3778	33.2618	34.5012	35.316
284	311.6	33.4024	31.9448	32.3834	33.2685	34.5066	35.3197
283	311.7	33.4092	31.9505	32.3898	33.2761	34.5116	35.325
282	311.8	33.4159	31.9576	32.3954	33.2835	34.5185	35.3306
281	311.9	33.4227	31.9634	32.4004	33.2918	34.5259	35.343
280	312	33.4294	31.9703	32.4084	33.2982	34.5344	35.3468
279	312.1	33.4362	31.9772	32.4172	33.3034	34.5424	35.3602
278	312.2	33.4429	31.9842	32.424	33.3108	34.5524	35.3691
277	312.3	33.4495	31.9898	32.4324	33.3185	34.5582	35.3777
276	312.4	33.4562	31.9977	32.4396	33.3239	34.5653	35.3856
275	312.5	33.4628	32.0069	32.4461	33.3309	34.5747	35.3922
274	312.6	33.4692	32.0126	32.454	33.3383	34.5844	35.3958
273	312.7	33.4757	32.0168	32.4611	33.3441	34.5882	35.4047
272	312.8	33.482	32.0269	32.4677	33.3505	34.5927	35.4073
271	312.9	33.4882	32.0335	32.4732	33.3573	34.5981	35.4085
270	313	33.4943	32.037	32.4774	33.3615	34.6012	35.4145
269	313.1	33.5003	32.0446	32.4838	33.3674	34.6067	35.4221
268	313.2	33.5061	32.0486	32.4892	33.3751	34.613	35.4267
267	313.3	33.5118	32.0572	32.4938	33.3827	34.6201	35.4316
266	313.4	33.5173	32.0619	32.4994	33.3875	34.6229	35.4398
265	313.5	33.5226	32.0676	32.5031	33.393	34.6303	35.45
264	313.6	33.5278	32.0713	32.5092	33.4	34.6378	35.4574
263	313.7	33.5327	32.0761	32.5131	33.4038	34.6416	35.4643
262	313.8	33.5375	32.0814	32.5186	33.4087	34.6484	35.4688
261	313.9	33.5419	32.0857	32.5219	33.4133	34.6539	35.4697
260	314	33.5462	32.088	32.5282	33.4169	34.6595	35.4775
259	314.1	33.5502	32.096	32.5354	33.4213	34.6648	35.4845
258	314.2	33.5539	32.1	32.5397	33.4259	34.6696	35.4881
257	314.3	33.5574	32.1016	32.5437	33.4289	34.6741	35.4917
256	314.4	33.5606	32.1038	32.5469	33.4315	34.6788	35.4942
255	314.5	33.5634	32.1071	32.5492	33.435	34.6812	35.4951
254	314.6	33.5661	32.1093	32.5517	33.4375	34.6837	35.4983
253	314.7	33.5684	32.112	32.5532	33.4398	34.6861	35.5008
252	314.8	33.5702	32.1135	32.5547	33.4411	34.688	35.5008
251	314.9	33.5718	32.1149	32.5557	33.4418	34.6886	35.5016
250	315	33.573	32.1152	32.5571	33.4427	34.6899	35.5048
249	315.1	33.5738	32.1167	32.5578	33.4434	34.6912	35.5048
248	315.2	33.5743	32.1171	32.5578	33.4438	34.6918	35.5048
247	315.3	33.5744	32.1171	32.5578	33.4439	34.6918	35.5048
246	315.4	33.5741	32.1167	32.5578	33.4435	34.6918	35.5048
245	315.5	33.5734	32.1157	32.5576	33.4431	34.6899	35.5048
244	315.6	33.5723	32.115	32.5563	33.4426	34.6893	35.5016
243	315.7	33.5707	32.1136	32.5548	33.4414	34.6886	35.5008
242	315.8	33.5688	32.112	32.5535	33.4398	34.6861	35.5008
241	315.9	33.5664	32.1099	32.5517	33.4378	34.6842	35.4983
240	316	33.5634	32.1071	32.5492	33.435	34.6812	35.4951
239	316.1	33.5601	32.1032	32.5468	33.4313	34.6763	35.4941
238	316.2	33.5563	32.1011	32.5419	33.4282	34.6729	35.4908
237	316.3	33.552	32.0977	32.5374	33.4235	34.6671	35.4856
236	316.4	33.5473	32.0912	32.5315	33.4177	34.6613	35.4806
235	316.5	33.542	32.0857	32.5219	33.4133	34.6539	35.4697
234	316.6	33.5364	32.0804	32.5172	33.408	34.6465	35.4685
233	316.7	33.5301	32.0742	32.5107	33.4016	34.64	35.4596
232	316.8	33.5234	32.0682	32.5038	33.3942	34.6316	35.4508
231	316.9	33.5161	32.0611	32.4987	33.3865	34.6215	35.4386
230	317	33.5083	32.0517	32.4909	33.3785	34.616	35.4297
229	317.1	33.5001	32.0444	32.4838	33.3674	34.6066	35.4221
228	317.2	33.4913	32.0346	32.4753	33.3595	34.6	35.4127
227	317.3	33.4818	32.0269	32.4674	33.3501	34.5921	35.4073
226	317.4	33.472	32.0134	32.4569	33.34	34.5866	35.4008
225	317.5	33.4616	32.0048	32.4444	33.3301	34.5728	35.3914
224	317.6	33.4506	31.9899	32.4342	33.319	34.559	35.3796
223	317.7	33.4391	31.9808	32.42	33.3062	34.547	35.3633
222	317.8	33.4271	31.9675	32.406	33.2955	34.5316	35.3451
221	317.9	33.4146	31.9563	32.3939	33.2817	34.5161	35.3297
220	318	33.4014	31.9446	32.3829	33.2676	34.5054	35.3197
219	318.1	33.3878	31.9309	32.3723	33.2539	34.496	35.3089
218	318.2	33.3736	31.9175	32.3571	33.2404	34.4795	35.2947
217	318.3	33.3589	31.9005	32.3425	33.2269	34.4627	35.2804
216	318.4	33.3436	31.8808	32.3258	33.2114	34.4473	35.2606
215	318.5	33.3278	31.8659	32.3067	33.1937	34.4314	35.2432
214	318.6	33.3114	31.8505	32.2893	33.1754	34.4101	35.2248
213	318.7	33.2946	31.8321	32.2737	33.1594	34.3966	35.2119
212	318.8	33.2772	31.8164	32.2582	33.1434	34.3803	35.1944
211	318.9	33.2592	31.7983	32.2426	33.1263	34.3619	35.1727
210	319	33.2408	31.7781	32.2241	33.1049	34.3406	35.1528
209	319.1	33.2217	31.7574	32.2033	33.0869	34.3143	35.1342
208	319.2	33.2022	31.7342	32.1814	33.0666	34.2993	35.1128
207	319.3	33.1822	31.7158	32.1605	33.0475	34.2831	35.0896
206	319.4	33.1617	31.6935	32.1421	33.0259	34.2605	35.0691
205	319.5	33.1406	31.6753	32.1194	33.004	34.2347	35.0495
204	319.6	33.1191	31.6513	32.096	32.9832	34.2119	35.0273
203	319.7	33.097	31.6275	32.0773	32.961	34.1923	35
202	319.8	33.0746	31.6029	32.0524	32.939	34.1694	34.9748
201	319.9	33.0516	31.5786	32.0293	32.9161	34.1433	34.9577
200	320	33.0282	31.5544	32.0035	32.8946	34.1167	34.9333
199	320.1	33.0043	31.5312	31.9814	32.8693	34.0993	34.9028
198	320.2	32.98	31.5025	31.9568	32.8457	34.0717	34.8743
197	320.3	32.9552	31.4745	31.9306	32.8188	34.0449	34.8562
196	320.4	32.93	31.4484	31.9054	32.7947	34.0155	34.8288
195	320.5	32.9044	31.4276	31.8755	32.7737	33.9974	34.798
194	320.6	32.8783	31.3919	31.85	32.7476	33.9731	34.77
193	320.7	32.8519	31.3638	31.8249	32.7185	33.9414	34.7455
192	320.8	32.8251	31.3392	31.7943	32.6924	33.9119	34.7165
191	320.9	32.7979	31.3119	31.7651	32.6674	33.8914	34.6843
190	321	32.7704	31.2792	31.7391	32.6407	33.8593	34.66
189	321.1	32.7425	31.247	31.7111	32.6163	33.8324	34.6294
188	321.2	32.7142	31.2208	31.6807	32.5871	33.8068	34.6
187	321.3	32.6857	31.1944	31.6478	32.557	33.7764	34.5688
186	321.4	32.6568	31.1562	31.6184	32.5313	33.7455	34.5406
185	321.5	32.6277	31.1238	31.5926	32.506	33.7182	34.5106
184	321.6	32.5982	31.0979	31.5601	32.4741	33.6871	34.4748
183	321.7	32.5685	31.0591	31.5258	32.4462	33.658	34.4481
182	321.8	32.5386	31.0295	31.4943	32.4191	33.627	34.4131
181	321.9	32.5083	30.9948	31.4649	32.3901	33.6024	34.3842
180	322	32.4779	30.9619	31.4318	32.3602	33.5688	34.3544
179	322.1	32.4473	30.9313	31.3978	32.3312	33.537	34.3184
178	322.2	32.4165	30.8946	31.3675	32.3015	33.5135	34.2889
177	322.3	32.3854	30.8618	31.3324	32.2718	33.4762	34.2548
176	322.4	32.3543	30.8281	31.3024	32.2446	33.4473	34.2216
175	322.5	32.3229	30.7945	31.2659	32.2115	33.4205	34.1916
174	322.6	32.2915	30.7591	31.2339	32.1844	33.3879	34.1579
173	322.7	32.26	30.7233	31.2014	32.1547	33.3549	34.1221
172	322.8	32.2284	30.6891	31.1681	32.1221	33.3295	34.0915
171	322.9	32.1966	30.6556	31.1317	32.094	33.2995	34.0609
170	323	32.1649	30.6184	31.0976	32.0661	33.2638	34.0225
169	323.1	32.1331	30.5836	31.0639	32.0339	33.2344	33.9892
168	323.2	32.1012	30.545	31.0259	32.0043	33.2073	33.9612
167	323.3	32.0695	30.513	30.9952	31.9746	33.1764	33.9256
166	323.4	32.0376	30.4795	30.959	31.9457	33.1418	33.8894
165	323.5	32.0059	30.4374	30.9232	31.916	33.1138	33.8635
164	323.6	31.9741	30.4056	30.8919	31.8851	33.0875	33.8259
163	323.7	31.9425	30.3699	30.8559	31.8564	33.0513	33.792
162	323.8	31.911	30.3265	30.8188	31.8272	33.0244	33.7631
161	323.9	31.8795	30.297	30.7877	31.7967	32.9963	33.7265
160	324	31.8482	30.2636	30.7504	31.7698	32.9656	33.6942
159	324.1	31.8171	30.22	30.7195	31.7389	32.9333	33.6671
158	324.2	31.7862	30.1898	30.6833	31.7102	32.9085	33.6273
157	324.3	31.7553	30.1534	30.6509	31.6815	32.8746	33.6012
156	324.4	31.7248	30.1178	30.6184	31.6543	32.8472	33.5699
155	324.5	31.6943	30.0825	30.5799	31.6252	32.8202	33.5355
154	324.6	31.6642	30.0496	30.5502	31.599	32.7888	33.505
153	324.7	31.6345	30.0128	30.5199	31.5717	32.761	33.4771
152	324.8	31.6049	29.9808	30.4826	31.5442	32.7354	33.4461
151	324.9	31.5756	29.9449	30.4557	31.5188	32.708	33.4165
150	325	31.5467	29.9132	30.4229	31.4922	32.678	33.3872
149	325.1	31.5181	29.8828	30.3905	31.4658	32.6494	33.3618
148	325.2	31.4899	29.8446	30.3618	31.4367	32.6253	33.3326
147	325.3	31.4621	29.8123	30.3289	31.4146	32.6013	33.2945
146	325.4	31.4346	29.788	30.2985	31.3896	32.5701	33.2769
145	325.5	31.4077	29.7514	30.2709	31.3641	32.544	33.2475
144	325.6	31.3811	29.7169	30.2424	31.3379	32.5211	33.219
143	325.7	31.355	29.6933	30.215	31.3148	32.4971	33.1897
142	325.8	31.3294	29.6629	30.1839	31.292	32.4716	33.1714
141	325.9	31.3043	29.6299	30.159	31.2669	32.4475	33.1439
140	326	31.2796	29.6007	30.133	31.2433	32.423	33.1154
139	326.1	31.2556	29.58	30.1059	31.2217	32.4013	33.093
138	326.2	31.2321	29.5476	30.0787	31.204	32.3761	33.0735
137	326.3	31.2092	29.5193	30.0518	31.1799	32.3589	33.0474
136	326.4	31.1869	29.4948	30.0329	31.158	32.3363	33.0213
135	326.5	31.1651	29.4723	30.0081	31.1368	32.3158	32.999
134	326.6	31.144	29.4439	29.9802	31.1189	32.289	32.9837
133	326.7	31.1236	29.42	29.9598	31.1025	32.2745	32.9646
132	326.8	31.1038	29.3962	29.9413	31.0815	32.2577	32.9418
131	326.9	31.0847	29.3743	29.9194	31.0641	32.2398	32.9238
130	327	31.0663	29.355	29.8947	31.0442	32.223	32.9013
129	327.1	31.0487	29.3315	29.8797	31.0284	32.2009	32.886
128	327.2	31.0317	29.312	29.8615	31.0142	32.1866	32.8728
127	327.3	31.0155	29.2894	29.8432	30.9997	32.1717	32.8538
126	327.4	31.0001	29.2729	29.8228	30.9851	32.1595	32.8398
125	327.5	30.9854	29.2558	29.8056	30.971	32.1466	32.8256
124	327.6	30.9715	29.2403	29.7915	30.959	32.1336	32.8083
123	327.7	30.9585	29.2256	29.7811	30.9467	32.1188	32.799
122	327.8	30.9463	29.2113	29.7684	30.9348	32.1055	32.7872
121	327.9	30.9349	29.2	29.7548	30.9245	32.0946	32.7765
120	328	30.9245	29.1859	29.7427	30.9122	32.0869	32.7622
119	328.1	30.9149	29.1725	29.7307	30.9021	32.0753	32.7541
118	328.2	30.9061	29.1621	29.7196	30.8947	32.069	32.7467
117	328.3	30.8982	29.1531	29.7091	30.8879	32.0623	32.7393
116	328.4	30.8913	29.1443	29.7043	30.8824	32.0563	32.7313
115	328.5	30.8853	29.1376	29.6959	30.8778	32.0522	32.725
114	328.6	30.8802	29.1321	29.6911	30.8735	32.0484	32.7189
113	328.7	30.8762	29.127	29.6849	30.8705	32.0434	32.7135
112	328.8	30.873	29.1245	29.6824	30.8685	32.0417	32.7121
111	328.9	30.8708	29.1209	29.6805	30.8662	32.0393	32.7118
110	329	30.8696	29.1183	29.6799	30.8651	32.0379	32.7118
109	329.1	30.8694	29.1178	29.6796	30.8649	32.0377	32.7118
108	329.2	30.8703	29.1204	29.6805	30.8656	32.0391	32.7118
107	329.3	30.8721	29.1234	29.6815	30.8673	32.0412	32.7118
106	329.4	30.875	29.1261	29.6833	30.8697	32.0428	32.7133
105	329.5	30.8789	29.131	29.6895	30.8727	32.0468	32.718
104	329.6	30.8838	29.1364	29.6935	30.8764	32.0516	32.7236
103	329.7	30.8898	29.1424	29.7022	30.8815	32.0556	32.7302
102	329.8	30.8969	29.1514	29.7065	30.8875	32.0605	32.7366
101	329.9	30.905	29.1606	29.7176	30.893	32.0676	32.7455
100	330	30.9142	29.1707	29.7303	30.9019	32.0744	32.7529
99	330.1	30.9245	29.1859	29.7427	30.9122	32.0869	32.7622
98	330.2	30.9359	29.2	29.7559	30.925	32.0955	32.7788
97	330.3	30.9484	29.2123	29.7715	30.9368	32.1081	32.7883
96	330.4	30.9619	29.2299	29.7834	30.9495	32.1243	32.799
95	330.5	30.9766	29.2455	29.7955	30.9631	32.1394	32.8129
94	330.6	30.9924	29.2671	29.8135	30.9784	32.1518	32.831
93	330.7	31.0093	29.284	29.8358	30.9929	32.1658	32.8481
92	330.8	31.0274	29.3098	29.8571	31.0101	32.1826	32.8679
91	330.9	31.0465	29.3289	29.877	31.0264	32.198	32.8851
90	331	31.0668	29.3559	29.8963	31.0448	32.2233	32.9013
89	331.1	31.0882	29.3779	29.9216	31.0671	32.2437	32.9259
88	331.2	31.1107	29.4033	29.9475	31.0894	32.2645	32.9468
87	331.3	31.1344	29.4329	29.9718	31.1114	32.2807	32.9762
86	331.4	31.1592	29.4631	29.9996	31.1317	32.3094	32.9967
85	331.5	31.1851	29.4926	30.0312	31.1552	32.3351	33.0189
84	331.6	31.2122	29.5216	30.0563	31.1854	32.3611	33.0526
83	331.7	31.2404	29.5586	30.0861	31.2103	32.3825	33.0793
82	331.8	31.2696	29.5899	30.1234	31.2356	32.4143	33.1027
81	331.9	31.3002	29.6243	30.1553	31.2624	32.444	33.138
80	332	31.3317	29.665	30.1858	31.295	32.4727	33.1718
79	332.1	31.3644	29.7007	30.2255	31.3237	32.5055	33.1957
78	332.2	31.3982	29.7412	30.2616	31.3538	32.5357	33.2369
77	332.3	31.4332	29.7864	30.297	31.3886	32.569	33.2744
76	332.4	31.4692	29.8225	30.3376	31.4212	32.6071	33.3
75	332.5	31.5064	29.8672	30.3778	31.4535	32.638	33.3468
74	332.6	31.5446	29.9123	30.4208	31.4893	32.6765	33.3867
73	332.7	31.5841	29.9536	30.4625	31.5254	32.7153	33.4237
72	332.8	31.6245	30.0051	30.5053	31.5615	32.7517	33.4667
71	332.9	31.666	30.0511	30.5521	31.5997	32.79	33.5085
70	333	31.7087	30.1007	30.5982	31.6402	32.8333	33.5519
69	333.1	31.7524	30.1508	30.6475	31.6794	32.8719	33.6
68	333.2	31.7972	30.2032	30.6958	31.7205	32.9167	33.643
67	333.3	31.8431	30.2579	30.7454	31.7651	32.9583	33.6928
66	333.4	31.8899	30.3073	30.7989	31.8061	33.005	33.7361
65	333.5	31.9379	30.3653	30.852	31.8534	33.048	33.787
64	333.6	31.9869	30.4166	30.9014	31.8966	33.0964	33.8372
63	333.7	32.0368	30.478	30.9579	31.9455	33.1414	33.8892
62	333.8	32.0878	30.5294	31.014	31.993	33.1923	33.9467
61	333.9	32.1399	30.5924	31.0702	32.0398	33.2401	33.9989
60	334	32.193	30.6511	31.1266	32.0901	33.2938	34.0559
59	334.1	32.2469	30.7101	31.1858	32.1422	33.3431	34.1093
58	334.2	32.3019	30.7705	31.2431	32.1927	33.399	34.1699
57	334.3	32.3578	30.8327	31.3041	32.2474	33.4486	34.2237
56	334.4	32.4147	30.8938	31.3649	32.2995	33.5122	34.2838
55	334.5	32.4725	30.9545	31.4261	32.3553	33.5624	34.3472
54	334.6	32.5313	31.0241	31.4874	32.4117	33.6208	34.407
53	334.7	32.5909	31.0879	31.5503	32.4667	33.6795	34.4692
52	334.8	32.6514	31.1481	31.6135	32.5266	33.7389	34.533
51	334.9	32.7128	31.2188	31.679	32.5858	33.8057	34.597
50	335	32.7751	31.2846	31.744	32.6449	33.8646	34.664
49	335.1	32.8382	31.3494	31.8102	32.7041	33.9247	34.7327
48	335.2	32.9022	31.4246	31.8737	32.7714	33.9955	34.7942
47	335.3	32.967	31.4881	31.9412	32.8311	34.0596	34.8642
46	335.4	33.0325	31.5582	32.0086	32.8981	34.123	34.9354
45	335.5	33.0989	31.6288	32.0801	32.9628	34.1937	35.0026
44	335.6	33.166	31.7	32.1453	33.0308	34.2642	35.0721
43	335.7	33.2338	31.7702	32.2154	33.0996	34.3322	35.1442
42	335.8	33.3025	31.8405	32.2814	33.1669	34.4024	35.2161
41	335.9	33.3719	31.9157	32.3558	33.2389	34.4786	35.2945
40	336	33.4418	31.9832	32.4235	33.3094	34.551	35.3673
39	336.1	33.5126	32.0577	32.4944	33.3829	34.6202	35.433
38	336.2	33.5839	32.1254	32.5686	33.4531	34.6987	35.5118
37	336.3	33.6559	32.2027	32.6422	33.5285	34.7741	35.5911
36	336.4	33.7285	32.2723	32.7153	33.6017	34.8488	35.6711
35	336.5	33.8018	32.3428	32.7911	33.6776	34.9239	35.7395
34	336.6	33.8756	32.4181	32.8618	33.7553	35.0029	35.8208
33	336.7	33.95	32.4864	32.9349	33.8297	35.0809	35.9031
32	336.8	34.0249	32.5601	33.0127	33.9067	35.1651	35.9805
31	336.9	34.1003	32.6336	33.0847	33.9853	35.2396	36.0543
30	337	34.1762	32.7037	33.1595	34.063	35.3167	36.138
29	337.1	34.2526	32.7813	33.2343	34.1408	35.4017	36.2213
28	337.2	34.3296	32.8497	33.3084	34.223	35.4821	36.2983
27	337.3	34.4069	32.9203	33.3834	34.302	35.5581	36.3797
26	337.4	34.4846	32.9985	33.4574	34.3767	35.6393	36.4609
25	337.5	34.5628	33.0701	33.5319	34.4547	35.7228	36.548
24	337.6	34.6412	33.1406	33.6027	34.5323	35.8073	36.6274
23	337.7	34.7201	33.2123	33.6818	34.6126	35.8908	36.7138
22	337.8	34.7993	33.29	33.7528	34.689	35.9737	36.8008
21	337.9	34.8788	33.362	33.8324	34.7681	36.0554	36.8871
20	338	34.9585	33.4333	33.9099	34.8476	36.1353	36.9684
19	338.1	35.0386	33.5014	33.9827	34.9229	36.221	37.048
18	338.2	35.1189	33.5783	34.0585	35.0037	36.3065	37.1384
17	338.3	35.1994	33.6485	34.1355	35.0889	36.391	37.2304
16	338.4	35.2801	33.7244	34.2098	35.1707	36.4733	37.3173
15	338.5	35.361	33.7926	34.2835	35.2525	36.555	37.4025
14	338.6	35.442	33.8656	34.3586	35.3315	36.6357	37.4872
13	338.7	35.5232	33.936	34.4323	35.4152	36.7245	37.5757
12	338.8	35.6044	34.0071	34.5069	35.5017	36.8103	37.6609
11	338.9	35.6859	34.0756	34.5736	35.5835	36.9007	37.7496
10	339	35.7672	34.1466	34.65	35.6607	36.9815	37.8391
9	339.1	35.8487	34.2169	34.7227	35.7442	37.0617	37.9288
8	339.2	35.9301	34.2832	34.7977	35.8241	37.1478	38.0125
7	339.3	36.0115	34.3534	34.8685	35.9057	37.2367	38.0967
6	339.4	36.0929	34.4131	34.941	35.9855	37.3194	38.1871
5	339.5	36.1742	34.4924	35.0147	36.0662	37.4062	38.2762
4	339.6	36.2555	34.5549	35.0833	36.148	37.4934	38.3628
3	339.7	36.3367	34.6203	35.1545	36.23	37.5817	38.4508
2	339.8	36.4177	34.6889	35.2277	36.311	37.6667	38.536
1	339.9	36.4986	34.7528	35.3021	36.3924	37.7547	38.6231
0	340	36.5794	34.817	35.3692	36.4738	37.8421	38.7056

## Sheet: pH
	age	mean	5	16	50	84	95
750	265	8.09218	7.93043	7.98386	8.08915	8.19919	8.26764
749	265.1	8.08984	7.92705	7.98107	8.08683	8.19718	8.26523
748	265.2	8.08764	7.92364	7.97882	8.0851	8.19555	8.26331
747	265.3	8.08513	7.9206	7.97612	8.08252	8.19329	8.26028
746	265.4	8.08285	7.91689	7.9734	8.08036	8.19168	8.25826
745	265.5	8.08057	7.91401	7.97122	8.07823	8.18918	8.25552
744	265.6	8.0781	7.91099	7.96858	8.07602	8.18699	8.25361
743	265.7	8.07596	7.90824	7.9664	8.07397	8.18432	8.25143
742	265.8	8.07353	7.90476	7.9635	8.0717	8.18253	8.24937
741	265.9	8.07135	7.90234	7.96165	8.06968	8.18034	8.24732
740	266	8.069	7.8996	7.95873	8.06749	8.17746	8.2459
739	266.1	8.06672	7.89616	7.95603	8.06525	8.17552	8.24395
738	266.2	8.06451	7.89365	7.95373	8.06322	8.17295	8.2419
737	266.3	8.06237	7.89145	7.95188	8.0609	8.1703	8.23987
736	266.4	8.05994	7.88923	7.94889	8.05924	8.16818	8.23797
735	266.5	8.05785	7.88661	7.94688	8.05694	8.16605	8.23636
734	266.6	8.05548	7.88351	7.9443	8.05469	8.164	8.23486
733	266.7	8.05342	7.8814	7.942	8.05268	8.16182	8.23363
732	266.8	8.05108	7.87824	7.93955	8.05074	8.1592	8.23054
731	266.9	8.04903	7.87571	7.93778	8.04823	8.15668	8.22928
730	267	8.04689	7.87303	7.93515	8.04606	8.15498	8.22774
729	267.1	8.04474	7.87113	7.93282	8.04403	8.15306	8.22591
728	267.2	8.04281	7.86862	7.93129	8.04198	8.15057	8.22442
727	267.3	8.0409	7.86651	7.92888	8.04021	8.14927	8.22253
726	267.4	8.03866	7.86409	7.9265	8.03818	8.14741	8.22013
725	267.5	8.03684	7.86174	7.925	8.03629	8.14572	8.21818
724	267.6	8.03505	7.86035	7.92298	8.03429	8.14362	8.21708
723	267.7	8.03317	7.85854	7.92105	8.03223	8.14217	8.21547
722	267.8	8.03131	7.857	7.91947	8.03056	8.13989	8.214
721	267.9	8.02936	7.85435	7.9175	8.02824	8.13846	8.21135
720	268	8.02761	7.85255	7.91593	8.02675	8.13689	8.20924
719	268.1	8.02579	7.85054	7.91357	8.025	8.13528	8.20803
718	268.2	8.02405	7.84991	7.91205	8.02293	8.13363	8.20592
717	268.3	8.02282	7.84842	7.91112	8.02116	8.13251	8.20437
716	268.4	8.02095	7.84648	7.90909	8.0193	8.13118	8.202
715	268.5	8.01951	7.84446	7.90762	8.01825	8.12938	8.20036
714	268.6	8.01809	7.84409	7.90631	8.01684	8.12841	8.1982
713	268.7	8.01639	7.84259	7.90477	8.01512	8.1265	8.19665
712	268.8	8.01503	7.8414	7.90327	8.01387	8.1257	8.19488
711	268.9	8.01388	7.84022	7.90216	8.01253	8.12503	8.1937
710	269	8.01235	7.83889	7.90077	8.01108	8.12385	8.19104
709	269.1	8.01134	7.83813	7.90017	8.01005	8.12259	8.18963
708	269.2	8.01017	7.83744	7.8993	8.00874	8.12138	8.18781
707	269.3	8.0089	7.83592	7.89798	8.00737	8.12025	8.18629
706	269.4	8.00815	7.83559	7.89718	8.00678	8.12041	8.18467
705	269.5	8.00702	7.83473	7.89659	8.00563	8.1193	8.18293
704	269.6	8.00583	7.83425	7.8954	8.00413	8.11855	8.18124
703	269.7	8.00524	7.83363	7.89479	8.00388	8.11733	8.17976
702	269.8	8.0042	7.83287	7.89371	8.00236	8.11695	8.17841
701	269.9	8.00351	7.83288	7.89333	8.00159	8.11616	8.17719
700	270	8.00303	7.83304	7.89319	8.00089	8.11584	8.17557
699	270.1	8.00244	7.83236	7.89271	8.00074	8.11508	8.17439
698	270.2	8.0018	7.8326	7.89233	7.99974	8.1151	8.17329
697	270.3	8.00125	7.83218	7.89189	7.99938	8.11462	8.17171
696	270.4	8.00089	7.8329	7.89181	7.99841	8.11465	8.17099
695	270.5	8.00033	7.83254	7.8915	7.99793	8.11414	8.17027
694	270.6	8.00019	7.83302	7.89172	7.99767	8.11422	8.16898
693	270.7	7.99986	7.83352	7.89155	7.99729	8.11393	8.16854
692	270.8	7.99968	7.83366	7.89179	7.99708	8.11336	8.16777
691	270.9	7.99959	7.83415	7.892	7.99681	8.11317	8.16716
690	271	7.99939	7.83419	7.89169	7.99679	8.11296	8.16667
689	271.1	7.99939	7.83478	7.89225	7.9965	8.11274	8.1662
688	271.2	7.9993	7.83537	7.89238	7.99643	8.11282	8.16589
687	271.3	7.99943	7.83635	7.89263	7.99641	8.11296	8.16547
686	271.4	7.9994	7.83658	7.89293	7.99647	8.1128	8.16552
685	271.5	7.99975	7.83795	7.89399	7.99651	8.11329	8.16583
684	271.6	7.99979	7.83821	7.89409	7.99679	8.11267	8.16517
683	271.7	8.00021	7.83946	7.89461	7.99729	8.11317	8.16552
682	271.8	8.00063	7.84024	7.89539	7.99739	8.11323	8.16599
681	271.9	8.00086	7.84101	7.89621	7.9974	8.11305	8.16561
680	272	8.0011	7.84184	7.89667	7.99756	8.11347	8.1658
679	272.1	8.00161	7.84311	7.89737	7.99792	8.11371	8.16544
678	272.2	8.00219	7.84464	7.89845	7.99833	8.11378	8.1661
677	272.3	8.00263	7.84573	7.89904	7.99865	8.11424	8.16615
676	272.4	8.00316	7.84634	7.89983	7.99918	8.11467	8.16697
675	272.5	8.00354	7.8474	7.90082	7.99979	8.11435	8.16733
674	272.6	8.00417	7.84817	7.9021	8.00032	8.11433	8.16671
673	272.7	8.00464	7.84988	7.90268	8.00075	8.11484	8.16693
672	272.8	8.00547	7.8514	7.90401	8.00152	8.11547	8.16767
671	272.9	8.00594	7.85145	7.9047	8.00178	8.11606	8.16806
670	273	8.00655	7.85258	7.90572	8.00216	8.11659	8.16814
669	273.1	8.00712	7.85305	7.90635	8.00285	8.11688	8.16822
668	273.2	8.00787	7.85464	7.90754	8.00323	8.11748	8.16856
667	273.3	8.00839	7.85519	7.90869	8.00371	8.11791	8.16885
666	273.4	8.00901	7.8559	7.90913	8.00416	8.11866	8.16949
665	273.5	8.00935	7.85587	7.90993	8.00428	8.11873	8.16973
664	273.6	8.01042	7.85798	7.91157	8.00501	8.11969	8.17087
663	273.7	8.01085	7.858	7.91264	8.00512	8.12033	8.1712
662	273.8	8.0113	7.8587	7.91316	8.00544	8.12102	8.17114
661	273.9	8.01183	7.85944	7.91387	8.00606	8.12161	8.17192
660	274	8.01223	7.86008	7.91444	8.00643	8.12171	8.17148
659	274.1	8.01274	7.86062	7.91521	8.00697	8.12235	8.1728
658	274.2	8.01326	7.86079	7.91612	8.00717	8.12291	8.173
657	274.3	8.01382	7.86149	7.91675	8.00774	8.12316	8.17327
656	274.4	8.01381	7.86099	7.91707	8.00757	8.12384	8.17348
655	274.5	8.01441	7.86212	7.91805	8.00797	8.12429	8.17367
654	274.6	8.01469	7.86203	7.91808	8.00834	8.12482	8.17424
653	274.7	8.01477	7.86223	7.91872	8.00819	8.12494	8.1739
652	274.8	8.01501	7.86184	7.9189	8.00834	8.12549	8.17389
651	274.9	8.01511	7.86224	7.9191	8.00804	8.12576	8.17403
650	275	8.01505	7.86172	7.91905	8.00821	8.12566	8.17395
649	275.1	8.01512	7.86157	7.91876	8.00816	8.12608	8.17391
648	275.2	8.01497	7.86112	7.91825	8.00801	8.12616	8.17396
647	275.3	8.0148	7.86088	7.91815	8.00792	8.12619	8.17375
646	275.4	8.01468	7.86085	7.9179	8.00779	8.12619	8.17393
645	275.5	8.01438	7.86016	7.91736	8.0074	8.12602	8.17381
644	275.6	8.01394	7.85916	7.91723	8.00697	8.12583	8.17296
643	275.7	8.01357	7.85885	7.91632	8.00642	8.12573	8.17333
642	275.8	8.01283	7.85716	7.91557	8.00575	8.12522	8.17246
641	275.9	8.01207	7.85645	7.91479	8.00509	8.12469	8.1716
640	276	8.01137	7.85602	7.91379	8.00465	8.12377	8.17131
639	276.1	8.01057	7.85458	7.91261	8.00405	8.12306	8.17051
638	276.2	8.00949	7.85319	7.91122	8.00288	8.12275	8.17036
637	276.3	8.0085	7.85237	7.91023	8.00174	8.12181	8.17014
636	276.4	8.00724	7.85071	7.90861	8.0004	8.12085	8.16887
635	276.5	8.00633	7.85	7.90689	8.00002	8.12	8.16831
634	276.6	8.00479	7.84726	7.90485	7.99858	8.11822	8.16704
633	276.7	8.00337	7.84545	7.90302	7.99742	8.11709	8.16586
632	276.8	8.00203	7.84333	7.90125	7.99631	8.11589	8.16469
631	276.9	8.00015	7.8409	7.8991	7.99492	8.11451	8.1629
630	277	7.99845	7.83905	7.89716	7.99317	8.11265	8.16163
629	277.1	7.99677	7.83705	7.89493	7.99193	8.11126	8.16029
628	277.2	7.99473	7.83422	7.89242	7.9899	8.1092	8.15871
627	277.3	7.9926	7.83135	7.89	7.98816	8.10674	8.15672
626	277.4	7.99056	7.82874	7.88739	7.98636	8.10566	8.15535
625	277.5	7.98826	7.82583	7.88447	7.98444	8.10335	8.15282
624	277.6	7.98567	7.82299	7.88167	7.98184	8.1008	8.15062
623	277.7	7.98325	7.82	7.87876	7.97956	8.09876	8.14906
622	277.8	7.98088	7.8175	7.87562	7.9773	8.09632	8.14713
621	277.9	7.9781	7.81416	7.87238	7.97478	8.09375	8.14454
620	278	7.97527	7.81083	7.86883	7.97204	8.09128	8.14255
619	278.1	7.97245	7.80722	7.86544	7.96931	8.08896	8.13988
618	278.2	7.96962	7.80385	7.86224	7.96678	8.08587	8.13748
617	278.3	7.96642	7.79951	7.85784	7.96372	8.08274	8.13472
616	278.4	7.96322	7.79538	7.85433	7.96059	8.07979	8.13212
615	278.5	7.95983	7.79165	7.8507	7.95727	8.07645	8.12948
614	278.6	7.95653	7.78725	7.84629	7.95382	8.07368	8.12689
613	278.7	7.95308	7.78281	7.84218	7.95083	8.07062	8.12376
612	278.8	7.94968	7.77958	7.83789	7.94724	8.06765	8.12119
611	278.9	7.94597	7.77449	7.83361	7.94337	8.06435	8.11849
610	279	7.94235	7.7703	7.82903	7.93974	8.0615	8.11497
609	279.1	7.93872	7.76524	7.82486	7.93633	8.05772	8.112
608	279.2	7.93479	7.76087	7.81934	7.93237	8.05443	8.10858
607	279.3	7.93055	7.7554	7.81523	7.92815	8.05064	8.10533
606	279.4	7.92673	7.75066	7.81015	7.9244	8.04759	8.10213
605	279.5	7.92284	7.74551	7.80643	7.91992	8.04365	8.09918
604	279.6	7.91862	7.7399	7.80069	7.91627	8.04004	8.09582
603	279.7	7.9144	7.7349	7.79573	7.91157	8.03671	8.09201
602	279.8	7.9101	7.72888	7.79074	7.9076	8.03295	8.08893
601	279.9	7.90579	7.72337	7.78568	7.90321	8.02886	8.0846
600	280	7.90156	7.71802	7.78072	7.89925	8.02529	8.08163
599	280.1	7.89696	7.71186	7.77531	7.89465	8.02129	8.07776
598	280.2	7.89287	7.70678	7.7707	7.89116	8.01773	8.07411
597	280.3	7.88829	7.70049	7.76492	7.88631	8.01389	8.07053
596	280.4	7.8838	7.69488	7.76055	7.88202	8.01039	8.06652
595	280.5	7.87904	7.68915	7.7545	7.87696	8.00582	8.06244
594	280.6	7.87478	7.68264	7.74959	7.87304	8.00245	8.05883
593	280.7	7.87012	7.67809	7.74408	7.86819	7.99851	8.05465
592	280.8	7.86531	7.67107	7.73834	7.86378	7.99402	8.05042
591	280.9	7.86086	7.66532	7.73337	7.85938	7.99071	8.04726
590	281	7.85618	7.65889	7.72777	7.8548	7.98685	8.04252
589	281.1	7.85161	7.65337	7.72227	7.85042	7.98249	8.03947
588	281.2	7.84681	7.64705	7.71667	7.84605	7.97904	8.03521
587	281.3	7.84232	7.64112	7.71135	7.84136	7.97524	8.03134
586	281.4	7.83756	7.6355	7.70566	7.83688	7.97151	8.02773
585	281.5	7.8329	7.62875	7.7	7.83222	7.96786	8.0235
584	281.6	7.82829	7.62346	7.69519	7.82767	7.96346	8.01928
583	281.7	7.82368	7.61716	7.68952	7.82346	7.96039	8.01627
582	281.8	7.81907	7.61223	7.68452	7.81874	7.95629	8.01179
581	281.9	7.81438	7.60486	7.67876	7.81451	7.95293	8.0087
580	282	7.81003	7.59948	7.67426	7.81035	7.94915	8.00528
579	282.1	7.80531	7.5937	7.66842	7.80554	7.94552	8.00061
578	282.2	7.80087	7.58755	7.6632	7.80123	7.94149	7.99848
577	282.3	7.79644	7.58257	7.65798	7.79691	7.93841	7.99573
576	282.4	7.79195	7.57633	7.65307	7.79259	7.93442	7.99149
575	282.5	7.78745	7.57092	7.64776	7.78811	7.93104	7.98866
574	282.6	7.78316	7.565	7.64274	7.78413	7.9275	7.9854
573	282.7	7.77869	7.56067	7.63794	7.77975	7.9233	7.9823
572	282.8	7.77445	7.55384	7.63319	7.77548	7.92069	7.97908
571	282.9	7.77034	7.55	7.62806	7.77207	7.91679	7.97627
570	283	7.76574	7.54302	7.62266	7.76708	7.91257	7.97279
569	283.1	7.76186	7.53896	7.61787	7.76349	7.90995	7.96977
568	283.2	7.75769	7.53341	7.61316	7.75908	7.90605	7.96615
567	283.3	7.75372	7.52903	7.60885	7.75536	7.90272	7.9628
566	283.4	7.74969	7.52361	7.60384	7.7514	7.89963	7.96008
565	283.5	7.74592	7.51896	7.59938	7.74752	7.89626	7.95773
564	283.6	7.74201	7.514	7.595	7.74356	7.89307	7.9541
563	283.7	7.73788	7.50905	7.58957	7.7391	7.88979	7.95088
562	283.8	7.7346	7.50474	7.58643	7.73641	7.88704	7.9483
561	283.9	7.7306	7.50036	7.58145	7.73256	7.88323	7.94495
560	284	7.72712	7.49574	7.57772	7.72881	7.8802	7.94162
559	284.1	7.72361	7.49208	7.5742	7.72538	7.87711	7.93906
558	284.2	7.72012	7.48773	7.56977	7.72185	7.87462	7.93648
557	284.3	7.7168	7.48417	7.56609	7.71852	7.87097	7.93387
556	284.4	7.71339	7.48035	7.56195	7.71489	7.86856	7.93157
555	284.5	7.71021	7.47618	7.55911	7.71164	7.86588	7.92867
554	284.6	7.7068	7.47203	7.55503	7.7086	7.86242	7.92533
553	284.7	7.70378	7.46882	7.55172	7.70584	7.8602	7.92327
552	284.8	7.70093	7.46553	7.5486	7.70296	7.85744	7.9212
551	284.9	7.69814	7.46222	7.54564	7.70014	7.85511	7.91829
550	285	7.69514	7.45987	7.54271	7.69688	7.85175	7.91546
549	285.1	7.69249	7.45612	7.53953	7.69434	7.84951	7.91356
548	285.2	7.68963	7.45266	7.53671	7.69186	7.84713	7.9111
547	285.3	7.68714	7.45068	7.53434	7.68896	7.84478	7.90859
546	285.4	7.68463	7.44825	7.53161	7.6867	7.84255	7.90612
545	285.5	7.68197	7.44476	7.52878	7.68379	7.83945	7.90406
544	285.6	7.67958	7.44287	7.52617	7.68151	7.83782	7.9023
543	285.7	7.67762	7.44098	7.52459	7.6795	7.83557	7.90008
542	285.8	7.6756	7.43835	7.5226	7.67724	7.83332	7.89822
541	285.9	7.67348	7.43634	7.52089	7.67541	7.83134	7.89561
540	286	7.67145	7.43444	7.51845	7.67327	7.82966	7.89418
539	286.1	7.66956	7.43271	7.5166	7.6715	7.82788	7.89229
538	286.2	7.6677	7.43148	7.51511	7.66947	7.82527	7.88956
537	286.3	7.66624	7.42929	7.51414	7.6679	7.82378	7.88795
536	286.4	7.66469	7.42807	7.51309	7.66644	7.82176	7.88625
535	286.5	7.66304	7.42679	7.5113	7.66451	7.8203	7.88483
534	286.6	7.66202	7.42631	7.51029	7.66353	7.81889	7.88302
533	286.7	7.66088	7.42563	7.50977	7.66268	7.81726	7.88219
532	286.8	7.65974	7.42476	7.50975	7.66147	7.81592	7.88008
531	286.9	7.65867	7.42432	7.50913	7.66054	7.8142	7.87858
530	287	7.65789	7.42397	7.50813	7.65952	7.81298	7.87669
529	287.1	7.65707	7.42346	7.50782	7.65871	7.81184	7.87571
528	287.2	7.65645	7.4237	7.50786	7.65775	7.811	7.87511
527	287.3	7.65582	7.42333	7.5075	7.65704	7.81014	7.8738
526	287.4	7.65542	7.4244	7.50788	7.65665	7.80955	7.87261
525	287.5	7.65523	7.42408	7.50811	7.65667	7.80822	7.87177
524	287.6	7.65508	7.42577	7.50934	7.65622	7.80765	7.87067
523	287.7	7.65515	7.42676	7.50982	7.65642	7.80719	7.86993
522	287.8	7.65522	7.42727	7.51101	7.65642	7.80689	7.86905
521	287.9	7.65559	7.42809	7.51188	7.65673	7.80661	7.86889
520	288	7.65614	7.43	7.51306	7.65735	7.80648	7.86847
519	288.1	7.65648	7.43122	7.5141	7.65782	7.80644	7.86788
518	288.2	7.65739	7.43238	7.51583	7.65865	7.80656	7.86797
517	288.3	7.65827	7.43443	7.51758	7.65939	7.80668	7.8685
516	288.4	7.65934	7.43667	7.52006	7.66024	7.8072	7.86839
515	288.5	7.66064	7.43894	7.52247	7.66144	7.80748	7.86827
514	288.6	7.66182	7.44089	7.52418	7.66262	7.808	7.8685
513	288.7	7.66319	7.44333	7.52619	7.66399	7.80898	7.86933
512	288.8	7.66488	7.44653	7.52904	7.66532	7.80979	7.87014
511	288.9	7.66682	7.44987	7.5323	7.6674	7.81092	7.87079
510	289	7.66893	7.45265	7.5359	7.66936	7.8118	7.87194
509	289.1	7.6711	7.45679	7.53891	7.6718	7.81313	7.8728
508	289.2	7.67341	7.46031	7.54199	7.67367	7.81445	7.87399
507	289.3	7.67555	7.46281	7.54503	7.67581	7.81584	7.87506
506	289.4	7.67838	7.46753	7.5497	7.67858	7.81761	7.87675
505	289.5	7.68121	7.472	7.55311	7.68133	7.81927	7.87833
504	289.6	7.6841	7.47592	7.55733	7.684	7.82117	7.87982
503	289.7	7.68744	7.48133	7.56178	7.68718	7.82373	7.88194
502	289.8	7.69061	7.48546	7.56609	7.6903	7.82567	7.88367
501	289.9	7.69406	7.49091	7.57077	7.69409	7.82816	7.88564
500	290	7.69782	7.49551	7.57575	7.69731	7.83059	7.88804
499	290.1	7.70185	7.50204	7.58124	7.70135	7.83322	7.8906
498	290.2	7.70578	7.50768	7.5862	7.70508	7.8361	7.89288
497	290.3	7.71001	7.5126	7.59154	7.70945	7.83918	7.89613
496	290.4	7.71439	7.51947	7.59732	7.71379	7.84245	7.89826
495	290.5	7.71861	7.52451	7.60219	7.71771	7.84545	7.90131
494	290.6	7.72356	7.53152	7.60856	7.72289	7.84896	7.90459
493	290.7	7.72827	7.53781	7.61459	7.7272	7.85293	7.90764
492	290.8	7.73321	7.54464	7.62089	7.73193	7.85633	7.91118
491	290.9	7.73865	7.55223	7.6272	7.7374	7.86059	7.91513
490	291	7.74405	7.55912	7.63398	7.74275	7.86516	7.91883
489	291.1	7.7494	7.56586	7.64029	7.7477	7.86895	7.9232
488	291.2	7.75503	7.57353	7.64758	7.75356	7.87329	7.92671
487	291.3	7.7607	7.58144	7.65431	7.75905	7.87786	7.93083
486	291.4	7.76666	7.5892	7.6615	7.765	7.88261	7.93556
485	291.5	7.77261	7.59691	7.6692	7.77085	7.8873	7.93922
484	291.6	7.77893	7.60513	7.67632	7.77695	7.89263	7.94472
483	291.7	7.78523	7.61364	7.6839	7.78334	7.89713	7.94905
482	291.8	7.79153	7.62149	7.69085	7.78943	7.90238	7.95437
481	291.9	7.79816	7.63016	7.6991	7.79614	7.90781	7.95913
480	292	7.80478	7.6386	7.70679	7.80277	7.91292	7.96435
479	292.1	7.81163	7.64774	7.71502	7.8093	7.91855	7.96883
478	292.2	7.8186	7.65636	7.72288	7.81621	7.9243	7.97576
477	292.3	7.82542	7.66547	7.73116	7.82308	7.92929	7.97982
476	292.4	7.83238	7.67422	7.73913	7.82985	7.93511	7.9858
475	292.5	7.8394	7.6838	7.74735	7.83645	7.94084	7.99145
474	292.6	7.84679	7.69338	7.75598	7.84405	7.94637	7.99714
473	292.7	7.85394	7.70222	7.76429	7.85103	7.95276	8.00292
472	292.8	7.86114	7.71178	7.77259	7.85795	7.95791	8.00832
471	292.9	7.86858	7.7212	7.78102	7.86544	7.96446	8.01465
470	293	7.8759	7.73038	7.78955	7.87287	7.97039	8.02023
469	293.1	7.88324	7.74031	7.79802	7.8797	7.97627	8.02656
468	293.2	7.89055	7.74967	7.80623	7.88688	7.98279	8.03207
467	293.3	7.89814	7.75853	7.81514	7.89463	7.98902	8.03808
466	293.4	7.90549	7.76846	7.82358	7.90188	7.99515	8.0436
465	293.5	7.91295	7.77803	7.83231	7.90894	8.00124	8.04975
464	293.6	7.92038	7.78715	7.84066	7.91646	8.00781	8.05563
463	293.7	7.92782	7.79629	7.84894	7.92398	8.01382	8.06081
462	293.8	7.93513	7.80531	7.8573	7.93099	8.01993	8.067
461	293.9	7.94238	7.81418	7.86525	7.93818	8.02653	8.07247
460	294	7.94952	7.82364	7.87309	7.94518	8.03252	8.07799
459	294.1	7.95694	7.83279	7.88165	7.95234	8.03896	8.08471
458	294.2	7.96407	7.84162	7.88993	7.95957	8.04425	8.089
457	294.3	7.97088	7.85	7.89719	7.96655	8.0509	8.09518
456	294.4	7.97785	7.85901	7.9047	7.97325	8.05653	8.1005
455	294.5	7.98469	7.86661	7.91218	7.98021	8.06277	8.10663
454	294.6	7.99166	7.87512	7.92041	7.98695	8.06864	8.1119
453	294.7	7.99841	7.88356	7.92759	7.99394	8.07434	8.11743
452	294.8	8.00463	7.89098	7.93427	8.00024	8.07968	8.12264
451	294.9	8.01121	7.89879	7.94188	8.00688	8.0853	8.12847
450	295	8.01771	7.90656	7.94894	8.01353	8.0908	8.1334
449	295.1	8.02368	7.91411	7.95567	8.0194	8.09617	8.13854
448	295.2	8.02974	7.92164	7.96265	8.02586	8.10105	8.14349
447	295.3	8.03566	7.92896	7.96929	8.03175	8.10586	8.14828
446	295.4	8.04119	7.93547	7.97548	8.03737	8.11049	8.15291
445	295.5	8.0467	7.9423	7.98186	8.04288	8.11495	8.15789
444	295.6	8.05237	7.94897	7.98825	8.04869	8.11997	8.16163
443	295.7	8.05746	7.95508	7.994	8.05389	8.12423	8.16657
442	295.8	8.06241	7.96178	7.99971	8.05887	8.12802	8.16982
441	295.9	8.06721	7.96704	8.00489	8.06372	8.13236	8.17455
440	296	8.07213	7.97279	8.01054	8.06879	8.13637	8.1782
439	296.1	8.07629	7.97828	8.01516	8.07313	8.13979	8.18181
438	296.2	8.08051	7.98355	8.02036	8.0775	8.14349	8.18538
437	296.3	8.08447	7.98798	8.02411	8.08166	8.14664	8.18873
436	296.4	8.08849	7.99279	8.02895	8.08582	8.15014	8.19172
435	296.5	8.09219	7.99709	8.03292	8.08957	8.15332	8.19486
434	296.6	8.09551	8.0011	8.03666	8.09317	8.15618	8.19736
433	296.7	8.09878	8.00514	8.04019	8.09646	8.15909	8.2002
432	296.8	8.10181	8.00894	8.04344	8.10004	8.16157	8.2027
431	296.9	8.10461	8.01157	8.04625	8.10254	8.16436	8.20554
430	297	8.10718	8.01436	8.04906	8.1051	8.16678	8.20703
429	297.1	8.10982	8.01806	8.05226	8.10842	8.16871	8.20916
428	297.2	8.11177	8.02082	8.05417	8.11015	8.17019	8.2106
427	297.3	8.11374	8.02224	8.05613	8.1121	8.17266	8.21218
426	297.4	8.11559	8.02436	8.05833	8.11388	8.17434	8.21344
425	297.5	8.11718	8.02586	8.05989	8.11562	8.17554	8.21475
424	297.6	8.11849	8.0273	8.06151	8.1167	8.17683	8.21538
423	297.7	8.11965	8.02861	8.06272	8.1182	8.17764	8.21665
422	297.8	8.12064	8.02962	8.06361	8.11906	8.17874	8.21729
421	297.9	8.12141	8.03046	8.06461	8.1198	8.17949	8.21746
420	298	8.12193	8.03068	8.06531	8.12043	8.17979	8.21805
419	298.1	8.1222	8.03125	8.06536	8.12102	8.17995	8.21757
418	298.2	8.12252	8.03107	8.06571	8.12101	8.18008	8.21778
417	298.3	8.12261	8.03124	8.06584	8.12141	8.17981	8.21732
416	298.4	8.12243	8.03073	8.06563	8.12127	8.18035	8.21697
415	298.5	8.12222	8.0301	8.0653	8.12101	8.17975	8.21658
414	298.6	8.12148	8.0291	8.0648	8.12023	8.17896	8.21582
413	298.7	8.12112	8.02848	8.06462	8.11992	8.17829	8.21527
412	298.8	8.12013	8.02741	8.06352	8.11898	8.17748	8.21422
411	298.9	8.11928	8.02608	8.06264	8.11807	8.1769	8.21335
410	299	8.11809	8.02448	8.06153	8.117	8.17558	8.21204
409	299.1	8.11717	8.0236	8.06091	8.11565	8.17468	8.21092
408	299.2	8.11579	8.02141	8.05938	8.11456	8.17336	8.20958
407	299.3	8.1142	8.02	8.05779	8.11277	8.17207	8.2085
406	299.4	8.11265	8.01766	8.05653	8.111	8.17013	8.20737
405	299.5	8.1109	8.01548	8.05474	8.10911	8.16826	8.20616
404	299.6	8.10911	8.0133	8.05294	8.10727	8.16674	8.20456
403	299.7	8.10725	8.01063	8.05119	8.10552	8.16502	8.20322
402	299.8	8.10528	8.00866	8.04893	8.10344	8.16292	8.20072
401	299.9	8.10338	8.00613	8.04684	8.10164	8.16103	8.19966
400	300	8.10124	8.00372	8.04474	8.09912	8.15903	8.19801
399	300.1	8.09905	8.00047	8.04238	8.097	8.15702	8.19644
398	300.2	8.0966	7.99793	8.04015	8.09426	8.15484	8.19439
397	300.3	8.09447	7.99576	8.03724	8.09201	8.15271	8.19319
396	300.4	8.09202	7.9927	8.03451	8.08946	8.14998	8.19124
395	300.5	8.08983	7.9902	8.03194	8.087	8.1481	8.18984
394	300.6	8.08718	7.98719	8.02928	8.08444	8.14564	8.18712
393	300.7	8.08498	7.98477	8.02664	8.08207	8.14375	8.18503
392	300.8	8.08247	7.98175	8.02399	8.07951	8.1408	8.18304
391	300.9	8.08004	7.9788	8.02113	8.07706	8.13886	8.18188
390	301	8.07768	7.9759	8.01836	8.07474	8.13684	8.18065
389	301.1	8.07505	7.97357	8.01521	8.07189	8.13468	8.17844
388	301.2	8.07276	7.97126	8.01269	8.0695	8.13237	8.17683
387	301.3	8.07025	7.96766	8.01004	8.06734	8.13	8.17448
386	301.4	8.06801	7.96493	8.00706	8.06489	8.12855	8.17346
385	301.5	8.06563	7.96274	8.00408	8.06265	8.12628	8.17132
384	301.6	8.06307	7.95963	8.00083	8.06033	8.12419	8.16884
383	301.7	8.06076	7.9569	7.99848	8.0578	8.12189	8.16738
382	301.8	8.05858	7.95404	7.99576	8.05567	8.11971	8.16623
381	301.9	8.05638	7.95166	7.99299	8.0537	8.11826	8.16504
380	302	8.05425	7.94896	7.99065	8.05167	8.11643	8.16268
379	302.1	8.05214	7.94609	7.98753	8.04962	8.11498	8.16106
378	302.2	8.05	7.94379	7.98524	8.04757	8.11272	8.15972
377	302.3	8.04798	7.94119	7.98281	8.04567	8.11116	8.15879
376	302.4	8.0462	7.93845	7.98045	8.04371	8.10995	8.1581
375	302.5	8.04409	7.93604	7.97801	8.04165	8.10824	8.1565
374	302.6	8.04234	7.93349	7.97595	8.04019	8.10691	8.15565
373	302.7	8.04063	7.93163	7.97379	8.03824	8.10546	8.15443
372	302.8	8.03911	7.92972	7.97203	8.03685	8.10395	8.15367
371	302.9	8.03743	7.9273	7.9701	8.0351	8.10301	8.15303
370	303	8.03592	7.92527	7.96802	8.0337	8.10154	8.15221
369	303.1	8.03449	7.92321	7.96619	8.03235	8.10061	8.1512
368	303.2	8.03327	7.92189	7.96459	8.03111	8.09947	8.15051
367	303.3	8.03195	7.92005	7.96307	8.02974	8.09854	8.1503
366	303.4	8.03098	7.91874	7.96174	8.02892	8.09802	8.14964
365	303.5	8.02977	7.91717	7.96033	8.02798	8.09683	8.14906
364	303.6	8.029	7.9158	7.95894	8.02744	8.09637	8.14947
363	303.7	8.028	7.91441	7.95805	8.02655	8.09552	8.14828
362	303.8	8.02722	7.91374	7.95655	8.02578	8.09483	8.1487
361	303.9	8.02656	7.91285	7.95586	8.02538	8.09444	8.14817
360	304	8.02589	7.91226	7.95485	8.02485	8.09406	8.14753
359	304.1	8.02552	7.91181	7.9545	8.02449	8.09379	8.14777
358	304.2	8.02502	7.91143	7.9538	8.02409	8.09318	8.14708
357	304.3	8.02461	7.91065	7.95326	8.02353	8.09331	8.14691
356	304.4	8.02449	7.91049	7.95301	8.02353	8.09289	8.1471
355	304.5	8.02441	7.91019	7.95258	8.02333	8.09307	8.14737
354	304.6	8.02426	7.91052	7.95264	8.0232	8.09269	8.14714
353	304.7	8.02443	7.91025	7.95257	8.02335	8.09297	8.14737
352	304.8	8.02453	7.91025	7.95254	8.02341	8.09315	8.14703
351	304.9	8.02467	7.91005	7.95257	8.0237	8.09305	8.14731
350	305	8.02504	7.91047	7.95309	8.02409	8.09371	8.14705
349	305.1	8.0252	7.91022	7.95298	8.02438	8.0941	8.14787
348	305.2	8.02585	7.91097	7.95386	8.02492	8.09466	8.14806
347	305.3	8.02638	7.91145	7.95467	8.02539	8.09513	8.14832
346	305.4	8.02692	7.91159	7.95515	8.0261	8.09576	8.14864
345	305.5	8.02751	7.91221	7.95599	8.02651	8.09636	8.1487
344	305.6	8.02821	7.91264	7.95648	8.02744	8.09697	8.14888
343	305.7	8.02898	7.91345	7.95735	8.02797	8.09773	8.14934
342	305.8	8.02997	7.91419	7.95841	8.02887	8.09878	8.15
341	305.9	8.03091	7.91548	7.95979	8.02979	8.0993	8.15041
340	306	8.03201	7.91643	7.96063	8.03088	8.10093	8.15155
339	306.1	8.03306	7.91838	7.96198	8.03199	8.1017	8.15274
338	306.2	8.03415	7.92017	7.96329	8.03298	8.10276	8.15384
337	306.3	8.03529	7.9208	7.96446	8.03425	8.10382	8.15463
336	306.4	8.03646	7.92202	7.9658	8.03551	8.10499	8.1556
335	306.5	8.03772	7.92353	7.96718	8.03659	8.10593	8.15625
334	306.6	8.03908	7.92503	7.96855	8.03811	8.10735	8.15713
333	306.7	8.04044	7.92635	7.97023	8.03936	8.10871	8.15803
332	306.8	8.04188	7.92782	7.9717	8.04091	8.11009	8.15932
331	306.9	8.04341	7.9297	7.97354	8.04265	8.11111	8.16073
330	307	8.04466	7.9317	7.97457	8.04375	8.11228	8.1621
329	307.1	8.04623	7.93329	7.97621	8.04543	8.11363	8.16302
328	307.2	8.04787	7.93488	7.97872	8.04714	8.11507	8.16411
327	307.3	8.04934	7.93669	7.98035	8.04868	8.11632	8.16533
326	307.4	8.05101	7.93868	7.98202	8.05045	8.11773	8.16644
325	307.5	8.05229	7.94104	7.9832	8.05168	8.11878	8.16712
324	307.6	8.0542	7.94292	7.98509	8.05356	8.12042	8.16863
323	307.7	8.05572	7.94435	7.98708	8.05522	8.12181	8.16965
322	307.8	8.0577	7.94678	7.98905	8.05722	8.12367	8.17127
321	307.9	8.05928	7.94952	7.99116	8.05862	8.12494	8.17254
320	308	8.061	7.95124	7.99284	8.0605	8.12665	8.17385
319	308.1	8.06272	7.95386	7.99503	8.06215	8.12801	8.17531
318	308.2	8.06437	7.95583	7.99694	8.06366	8.12927	8.17714
317	308.3	8.06594	7.95851	7.99844	8.06538	8.13066	8.17811
316	308.4	8.06761	7.96062	8.00049	8.06707	8.13245	8.17921
315	308.5	8.06929	7.96235	8.00205	8.06869	8.1341	8.17985
314	308.6	8.07083	7.96467	8.00391	8.06997	8.13536	8.18037
313	308.7	8.07274	7.96693	8.00613	8.07196	8.13728	8.1822
312	308.8	8.07432	7.96914	8.00806	8.07354	8.13857	8.18336
311	308.9	8.07604	7.97135	8.00997	8.07521	8.14008	8.18491
310	309	8.07784	7.97355	8.01175	8.07707	8.14205	8.18647
309	309.1	8.07927	7.97586	8.01341	8.07855	8.14292	8.18716
308	309.2	8.08109	7.97774	8.0152	8.0802	8.14453	8.1887
307	309.3	8.08266	7.98015	8.01732	8.08175	8.14584	8.18965
306	309.4	8.0842	7.9822	8.0192	8.08326	8.14693	8.19145
305	309.5	8.08574	7.98361	8.02053	8.0848	8.14866	8.19292
304	309.6	8.08739	7.98594	8.02255	8.08661	8.1497	8.19387
303	309.7	8.0889	7.9882	8.02415	8.08774	8.15097	8.19546
302	309.8	8.09051	7.99069	8.02587	8.08926	8.15261	8.19696
301	309.9	8.09169	7.99194	8.02708	8.0904	8.15383	8.19761
300	310	8.09325	7.99367	8.02924	8.09202	8.15489	8.19939
299	310.1	8.0946	7.99495	8.03069	8.0935	8.15622	8.19993
298	310.2	8.09601	7.99661	8.03194	8.09476	8.15741	8.20167
297	310.3	8.09717	7.9984	8.03297	8.09576	8.15845	8.20258
296	310.4	8.09852	8.00013	8.03455	8.09676	8.15992	8.20475
295	310.5	8.09973	8.00086	8.03572	8.09844	8.16042	8.20519
294	310.6	8.10091	8.00207	8.03695	8.09927	8.1618	8.20672
293	310.7	8.10216	8.00305	8.03838	8.10073	8.16291	8.20789
292	310.8	8.10329	8.00454	8.03967	8.10161	8.16374	8.20838
291	310.9	8.10446	8.00503	8.04038	8.10299	8.16509	8.2095
290	311	8.1052	8.00557	8.04131	8.10351	8.16569	8.21113
289	311.1	8.10623	8.00609	8.04215	8.10455	8.16666	8.21152
288	311.2	8.10716	8.00686	8.04328	8.10562	8.16721	8.21328
287	311.3	8.1081	8.00713	8.04376	8.10681	8.16837	8.21484
286	311.4	8.10899	8.00792	8.04457	8.1077	8.1692	8.21606
285	311.5	8.10976	8.00793	8.045	8.10863	8.16967	8.21685
284	311.6	8.11041	8.00838	8.04551	8.10943	8.17035	8.21767
283	311.7	8.11121	8.0089	8.04623	8.11025	8.17111	8.21868
282	311.8	8.11196	8.0097	8.04714	8.11082	8.17178	8.21959
281	311.9	8.11237	8.00958	8.04734	8.11122	8.17246	8.22087
280	312	8.11281	8.00915	8.04731	8.11204	8.17314	8.22202
279	312.1	8.11325	8.00915	8.04752	8.11241	8.17388	8.22323
278	312.2	8.11357	8.00885	8.04754	8.11292	8.17434	8.22434
277	312.3	8.11401	8.00912	8.04821	8.11346	8.17462	8.225
276	312.4	8.11427	8.00874	8.0479	8.11385	8.17492	8.22565
275	312.5	8.11452	8.00866	8.04744	8.11419	8.17572	8.22643
274	312.6	8.11467	8.00816	8.04717	8.11413	8.17592	8.22717
273	312.7	8.11497	8.00767	8.04711	8.11457	8.17643	8.22814
272	312.8	8.11486	8.00702	8.04638	8.11452	8.1767	8.22858
271	312.9	8.11519	8.00679	8.04634	8.11496	8.17749	8.22906
270	313	8.11504	8.00623	8.04594	8.11474	8.17775	8.22987
269	313.1	8.11506	8.00535	8.04566	8.11495	8.17805	8.23058
268	313.2	8.11471	8.0047	8.04491	8.11441	8.17834	8.23085
267	313.3	8.11462	8.00415	8.04463	8.11448	8.17837	8.23137
266	313.4	8.11438	8.00343	8.044	8.1142	8.17828	8.23136
265	313.5	8.114	8.00256	8.04318	8.11389	8.17885	8.23122
264	313.6	8.11371	8.00162	8.04271	8.11383	8.17886	8.23202
263	313.7	8.11324	8.00039	8.04199	8.11326	8.17891	8.23203
262	313.8	8.11295	7.99993	8.04142	8.11289	8.17898	8.23246
261	313.9	8.11249	7.99835	8.04073	8.11241	8.17904	8.23238
260	314	8.11177	7.99676	8.03945	8.11177	8.1789	8.23235
259	314.1	8.11114	7.99596	8.03899	8.11087	8.17817	8.2323
258	314.2	8.11056	7.99478	8.03804	8.11053	8.17809	8.23201
257	314.3	8.10981	7.99351	8.03696	8.10955	8.17743	8.23171
256	314.4	8.109	7.99219	8.036	8.10872	8.17706	8.23129
255	314.5	8.10849	7.99132	8.0353	8.10809	8.17704	8.23128
254	314.6	8.10739	7.9902	8.03405	8.10708	8.17633	8.23052
253	314.7	8.10662	7.98801	8.03279	8.10611	8.17606	8.2298
252	314.8	8.10591	7.98728	8.03184	8.1053	8.17571	8.22941
251	314.9	8.1049	7.98557	8.03112	8.10405	8.17506	8.22895
250	315	8.10407	7.98436	8.03035	8.10331	8.17451	8.22855
249	315.1	8.10301	7.9831	8.02918	8.10243	8.17354	8.22753
248	315.2	8.10221	7.98186	8.02824	8.10149	8.17293	8.22788
247	315.3	8.10092	7.98052	8.02678	8.09985	8.17205	8.22672
246	315.4	8.09978	7.97816	8.02527	8.09881	8.17131	8.22599
245	315.5	8.09875	7.97703	8.02423	8.09763	8.17038	8.22556
244	315.6	8.09769	7.97562	8.02289	8.09655	8.16982	8.22504
243	315.7	8.09653	7.97389	8.0219	8.0955	8.16916	8.22419
242	315.8	8.09539	7.97235	8.02075	8.09438	8.16836	8.22339
241	315.9	8.09434	7.97109	8.0196	8.09336	8.16739	8.2227
240	316	8.09289	7.96952	8.01801	8.09168	8.16642	8.22173
239	316.1	8.09196	7.96734	8.01668	8.09092	8.16583	8.22126
238	316.2	8.09066	7.96577	8.01529	8.08965	8.16456	8.22046
237	316.3	8.08944	7.96441	8.01375	8.08878	8.16375	8.21964
236	316.4	8.08827	7.96287	8.01252	8.08723	8.16284	8.21899
235	316.5	8.0872	7.96104	8.01185	8.08588	8.16233	8.21835
234	316.6	8.08603	7.95955	8.01076	8.08442	8.16148	8.21675
233	316.7	8.08469	7.95754	8.00886	8.08316	8.16049	8.21576
232	316.8	8.08356	7.9558	8.00753	8.08206	8.15954	8.21534
231	316.9	8.08252	7.95433	8.00632	8.08104	8.15898	8.21484
230	317	8.08127	7.95237	8.00466	8.0795	8.15815	8.2138
229	317.1	8.08009	7.95043	8.00323	8.07826	8.15723	8.21265
228	317.2	8.07894	7.94893	8.00204	8.07723	8.15648	8.21009
227	317.3	8.07777	7.94746	8.00039	8.076	8.15541	8.20977
226	317.4	8.07693	7.94575	7.99921	8.07517	8.15502	8.20866
225	317.5	8.07591	7.94425	7.99776	8.07431	8.15445	8.20836
224	317.6	8.07487	7.94262	7.99653	8.0733	8.1538	8.20744
223	317.7	8.0737	7.94122	7.99548	8.07207	8.15243	8.20697
222	317.8	8.07291	7.9391	7.99435	8.07131	8.15222	8.20628
221	317.9	8.07196	7.93788	7.99321	8.07032	8.15169	8.20576
220	318	8.07102	7.93654	7.99233	8.06954	8.15068	8.20477
219	318.1	8.07032	7.93532	7.99122	8.06917	8.15028	8.20397
218	318.2	8.0697	7.93411	7.99063	8.06832	8.14997	8.20362
217	318.3	8.06888	7.93333	7.98925	8.06773	8.14937	8.20256
216	318.4	8.06805	7.93215	7.98801	8.06683	8.14886	8.20158
215	318.5	8.06757	7.93056	7.98674	8.06652	8.14889	8.20107
214	318.6	8.06695	7.92959	7.98577	8.06614	8.14837	8.20065
213	318.7	8.06643	7.9285	7.98484	8.06579	8.14824	8.20026
212	318.8	8.06559	7.9281	7.98371	8.06475	8.14793	8.19935
211	318.9	8.06548	7.92746	7.98341	8.06487	8.14799	8.19893
210	319	8.06508	7.92681	7.98247	8.06446	8.14787	8.19905
209	319.1	8.06485	7.92573	7.98186	8.06435	8.14838	8.19937
208	319.2	8.06475	7.92554	7.9816	8.06443	8.1485	8.19916
207	319.3	8.06456	7.92419	7.98119	8.06442	8.14878	8.19877
206	319.4	8.06439	7.92408	7.98092	8.06434	8.14908	8.19883
205	319.5	8.0643	7.92353	7.98043	8.06416	8.14956	8.19922
204	319.6	8.06441	7.92323	7.98078	8.0644	8.14938	8.19911
203	319.7	8.06456	7.92293	7.98092	8.06454	8.14988	8.19975
202	319.8	8.06465	7.92215	7.98046	8.06495	8.15029	8.20036
201	319.9	8.06497	7.92118	7.98083	8.06528	8.15128	8.2
200	320	8.06515	7.92076	7.98111	8.06552	8.1517	8.20116
199	320.1	8.06561	7.92085	7.98131	8.06587	8.15216	8.20154
198	320.2	8.06622	7.92037	7.98181	8.06689	8.15324	8.20246
197	320.3	8.0665	7.92028	7.98207	8.06715	8.15382	8.20292
196	320.4	8.06709	7.92017	7.98269	8.06775	8.15477	8.2042
195	320.5	8.06781	7.91961	7.98299	8.06865	8.15552	8.20518
194	320.6	8.0685	7.92018	7.98381	8.06929	8.15665	8.20633
193	320.7	8.0693	7.91962	7.98421	8.07026	8.15757	8.20699
192	320.8	8.0702	7.92037	7.98511	8.07099	8.15869	8.20818
191	320.9	8.0711	7.92009	7.98618	8.07186	8.15938	8.20871
190	321	8.07226	7.92086	7.98713	8.07299	8.16096	8.21073
189	321.1	8.07349	7.92181	7.98822	8.07414	8.16277	8.21144
188	321.2	8.07437	7.92163	7.98919	8.07494	8.16415	8.21338
187	321.3	8.07571	7.92216	7.99033	8.07618	8.16597	8.21484
186	321.4	8.07701	7.92321	7.99155	8.07731	8.16714	8.21611
185	321.5	8.07857	7.92393	7.99298	8.07855	8.16924	8.21772
184	321.6	8.07993	7.92455	7.99419	8.08002	8.17068	8.21959
183	321.7	8.08131	7.92509	7.99579	8.08109	8.17197	8.22093
182	321.8	8.08288	7.926	7.9974	8.08282	8.17417	8.22226
181	321.9	8.08458	7.92696	7.99873	8.08465	8.17581	8.22415
180	322	8.0862	7.92787	8.00014	8.08635	8.17734	8.22569
179	322.1	8.08792	7.92917	8.00168	8.08782	8.17964	8.22746
178	322.2	8.08965	7.9303	8.00375	8.08942	8.18136	8.22899
177	322.3	8.09152	7.93121	8.00541	8.09125	8.18317	8.23105
176	322.4	8.09344	7.93292	8.00758	8.09331	8.18554	8.2327
175	322.5	8.09535	7.93491	8.00924	8.09516	8.18739	8.23461
174	322.6	8.09738	7.93625	8.01078	8.09697	8.18943	8.23683
173	322.7	8.09933	7.93776	8.01279	8.09898	8.1919	8.23872
172	322.8	8.10146	7.93937	8.01525	8.10071	8.194	8.24048
171	322.9	8.10346	7.94134	8.01683	8.10277	8.19617	8.24306
170	323	8.10562	7.9431	8.01973	8.10522	8.19802	8.24509
169	323.1	8.10797	7.94596	8.02176	8.10763	8.2	8.24704
168	323.2	8.11006	7.94784	8.02372	8.10989	8.20234	8.24875
167	323.3	8.11229	7.94922	8.02581	8.11204	8.20475	8.25169
166	323.4	8.11469	7.95236	8.02793	8.11471	8.20731	8.25448
165	323.5	8.11702	7.95372	8.03077	8.11724	8.20929	8.25686
164	323.6	8.11924	7.95673	8.03304	8.11939	8.21133	8.2586
163	323.7	8.12138	7.95867	8.03494	8.12191	8.21324	8.26083
162	323.8	8.12397	7.96132	8.03753	8.12433	8.21598	8.26441
161	323.9	8.12633	7.96379	8.04058	8.127	8.21813	8.26621
160	324	8.12883	7.9662	8.04287	8.12946	8.22028	8.26862
159	324.1	8.13127	7.96888	8.04526	8.13219	8.22276	8.27129
158	324.2	8.13343	7.97096	8.04818	8.13424	8.22497	8.27352
157	324.3	8.13607	7.97476	8.05135	8.13683	8.22728	8.27538
156	324.4	8.13846	7.97766	8.05338	8.13943	8.22924	8.27772
155	324.5	8.14082	7.97933	8.05589	8.14188	8.23144	8.27984
154	324.6	8.14355	7.98234	8.0593	8.14451	8.23409	8.28253
153	324.7	8.14579	7.98489	8.06184	8.1468	8.23648	8.28475
152	324.8	8.14841	7.98796	8.0643	8.15006	8.23845	8.28713
151	324.9	8.15091	7.99	8.06712	8.15214	8.24042	8.28916
150	325	8.15339	7.99381	8.07023	8.15457	8.24278	8.29151
149	325.1	8.15575	7.996	8.07256	8.15717	8.24464	8.29378
148	325.2	8.15809	7.99863	8.07541	8.15973	8.2468	8.2958
147	325.3	8.16059	8.00115	8.07833	8.16212	8.24903	8.29772
146	325.4	8.16287	8.00448	8.08096	8.16484	8.25033	8.29933
145	325.5	8.16554	8.00699	8.08347	8.16733	8.25253	8.3022
144	325.6	8.16773	8.01	8.08664	8.16958	8.25439	8.30331
143	325.7	8.16996	8.0126	8.08947	8.17189	8.25652	8.305
142	325.8	8.1725	8.01548	8.09219	8.17442	8.25852	8.30703
141	325.9	8.17486	8.01817	8.09444	8.17682	8.26024	8.30914
140	326	8.17711	8.02151	8.09729	8.17907	8.26189	8.31087
139	326.1	8.17934	8.02322	8.10008	8.18126	8.26409	8.31213
138	326.2	8.18169	8.02622	8.10289	8.18374	8.26546	8.31342
137	326.3	8.18379	8.02914	8.105	8.18572	8.26717	8.31497
136	326.4	8.18604	8.0317	8.10809	8.18784	8.26865	8.31596
135	326.5	8.18787	8.03396	8.11047	8.18976	8.26986	8.31718
134	326.6	8.19033	8.0372	8.11324	8.19223	8.27208	8.3191
133	326.7	8.19233	8.03921	8.11548	8.19453	8.27343	8.3198
132	326.8	8.19431	8.04324	8.1181	8.19609	8.27477	8.3207
131	326.9	8.19642	8.04588	8.12087	8.19817	8.27616	8.32265
130	327	8.19846	8.04847	8.12319	8.20052	8.2777	8.32361
129	327.1	8.20042	8.05143	8.12587	8.20238	8.27847	8.32438
128	327.2	8.2023	8.05491	8.12835	8.20406	8.28026	8.32559
127	327.3	8.20413	8.05706	8.1307	8.20616	8.28145	8.32649
126	327.4	8.20587	8.06022	8.1331	8.2076	8.28225	8.3268
125	327.5	8.20766	8.0626	8.13552	8.20909	8.2834	8.32815
124	327.6	8.20947	8.06531	8.13792	8.21152	8.28447	8.32861
123	327.7	8.21112	8.06771	8.14018	8.21293	8.28551	8.32964
122	327.8	8.21279	8.07099	8.14258	8.2147	8.28642	8.32959
121	327.9	8.21429	8.07383	8.1453	8.2161	8.28687	8.33012
120	328	8.2162	8.07773	8.14789	8.21808	8.28783	8.33131
119	328.1	8.21752	8.07952	8.14949	8.21945	8.28844	8.33168
118	328.2	8.21904	8.08337	8.15218	8.22101	8.28907	8.33215
117	328.3	8.22041	8.08635	8.15391	8.22233	8.28949	8.33222
116	328.4	8.22204	8.08916	8.15676	8.22413	8.29063	8.33227
115	328.5	8.22321	8.092	8.1587	8.22528	8.29097	8.3319
114	328.6	8.22445	8.09541	8.1607	8.22647	8.29145	8.33244
113	328.7	8.22586	8.09833	8.16282	8.22769	8.29187	8.33289
112	328.8	8.22727	8.10151	8.16489	8.22892	8.29254	8.33292
111	328.9	8.22833	8.1045	8.16653	8.23041	8.29279	8.33268
110	329	8.22949	8.10787	8.16839	8.23128	8.29348	8.33317
109	329.1	8.23076	8.11092	8.17057	8.23238	8.29412	8.33313
108	329.2	8.23184	8.11427	8.17228	8.23345	8.29427	8.33308
107	329.3	8.23279	8.11748	8.17415	8.23433	8.29429	8.33265
106	329.4	8.2338	8.12068	8.17557	8.23555	8.2944	8.33214
105	329.5	8.23491	8.12342	8.17741	8.23639	8.29507	8.33255
104	329.6	8.23553	8.12626	8.17821	8.23708	8.2951	8.33267
103	329.7	8.23626	8.13013	8.18044	8.23762	8.29514	8.33155
102	329.8	8.23737	8.13207	8.18215	8.23855	8.29563	8.33161
101	329.9	8.23796	8.13454	8.18317	8.2394	8.29539	8.33133
100	330	8.23881	8.13703	8.18431	8.24019	8.29551	8.33128
99	330.1	8.23933	8.13964	8.18563	8.24041	8.29525	8.33037
98	330.2	8.24006	8.14159	8.1866	8.24093	8.29567	8.33049
97	330.3	8.24055	8.14312	8.1876	8.24114	8.29556	8.32996
96	330.4	8.24124	8.14535	8.18876	8.24161	8.29597	8.3303
95	330.5	8.24175	8.14655	8.1896	8.24194	8.29585	8.33056
94	330.6	8.24227	8.14848	8.19046	8.24228	8.29566	8.33056
93	330.7	8.24284	8.15	8.19154	8.24261	8.29567	8.33096
92	330.8	8.24323	8.15048	8.19224	8.24291	8.29589	8.33165
91	330.9	8.24357	8.15096	8.19274	8.24313	8.29586	8.33186
90	331	8.24398	8.15188	8.19328	8.24339	8.29595	8.33209
89	331.1	8.2441	8.15297	8.19409	8.24355	8.2954	8.33112
88	331.2	8.24458	8.15377	8.19456	8.24391	8.29581	8.33243
87	331.3	8.24467	8.15432	8.1949	8.24394	8.29587	8.33258
86	331.4	8.24485	8.15511	8.19541	8.24414	8.29558	8.33295
85	331.5	8.24506	8.15536	8.19566	8.24419	8.29582	8.33377
84	331.6	8.24528	8.156	8.19597	8.24444	8.29578	8.33409
83	331.7	8.24518	8.15554	8.19556	8.2444	8.29583	8.33432
82	331.8	8.24543	8.15579	8.19562	8.24439	8.29601	8.33468
81	331.9	8.24544	8.15497	8.19562	8.2445	8.29635	8.33495
80	332	8.24531	8.15468	8.19503	8.2446	8.29583	8.33521
79	332.1	8.24541	8.15473	8.19464	8.24454	8.29639	8.33546
78	332.2	8.24538	8.15414	8.19418	8.24451	8.29681	8.33609
77	332.3	8.24527	8.15399	8.19381	8.24447	8.29685	8.33622
76	332.4	8.24509	8.15291	8.19329	8.24425	8.29725	8.33624
75	332.5	8.24492	8.15173	8.19232	8.24404	8.29756	8.33685
74	332.6	8.24489	8.15174	8.1922	8.24388	8.29802	8.3374
73	332.7	8.24461	8.15098	8.1914	8.24357	8.29819	8.33744
72	332.8	8.2443	8.15021	8.19002	8.24346	8.29819	8.33769
71	332.9	8.24434	8.14994	8.18967	8.24341	8.29916	8.33833
70	333	8.24384	8.14878	8.18809	8.24286	8.29903	8.33832
69	333.1	8.24373	8.14738	8.18756	8.24271	8.29966	8.33842
68	333.2	8.24339	8.14645	8.18649	8.24218	8.29985	8.33896
67	333.3	8.24305	8.14492	8.18578	8.24211	8.29993	8.33914
66	333.4	8.24274	8.14405	8.18462	8.24141	8.30061	8.33994
65	333.5	8.24247	8.1427	8.18346	8.24108	8.30127	8.34075
64	333.6	8.24194	8.14134	8.18228	8.24033	8.30156	8.34159
63	333.7	8.2418	8.14098	8.18136	8.24001	8.30223	8.34234
62	333.8	8.24128	8.13903	8.1801	8.23975	8.30246	8.34358
61	333.9	8.24103	8.13785	8.17892	8.23948	8.30305	8.34489
60	334	8.2406	8.13616	8.17769	8.23905	8.3036	8.34628
59	334.1	8.23995	8.13434	8.17612	8.23842	8.30357	8.34647
58	334.2	8.23955	8.13222	8.17478	8.23811	8.30396	8.34811
57	334.3	8.23915	8.13142	8.17379	8.23721	8.30432	8.34861
56	334.4	8.23875	8.1298	8.17272	8.2368	8.3048	8.34953
55	334.5	8.2382	8.12816	8.17145	8.2361	8.30499	8.35087
54	334.6	8.23773	8.1263	8.17005	8.23563	8.30535	8.35254
53	334.7	8.23741	8.12478	8.16884	8.23507	8.3059	8.35443
52	334.8	8.23679	8.12293	8.1674	8.23452	8.30604	8.35494
51	334.9	8.23641	8.12168	8.16598	8.23398	8.30662	8.35642
50	335	8.23581	8.12024	8.16439	8.23339	8.30678	8.35707
49	335.1	8.2352	8.11828	8.16289	8.23297	8.30682	8.35789
48	335.2	8.23469	8.11595	8.16139	8.23218	8.30717	8.35881
47	335.3	8.23412	8.1139	8.15965	8.23173	8.30728	8.36041
46	335.4	8.23355	8.11221	8.15854	8.23091	8.30744	8.361
45	335.5	8.2333	8.11111	8.15741	8.23071	8.30804	8.36267
44	335.6	8.23268	8.1094	8.15582	8.23	8.3083	8.3638
43	335.7	8.23207	8.10754	8.15422	8.22938	8.30844	8.3647
42	335.8	8.23172	8.10601	8.15312	8.22924	8.30863	8.36545
41	335.9	8.23126	8.10442	8.15191	8.22846	8.30908	8.36684
40	336	8.23058	8.10303	8.15056	8.22802	8.30856	8.36772
39	336.1	8.23018	8.10163	8.14911	8.22739	8.30923	8.36878
38	336.2	8.22978	8.1003	8.14787	8.22736	8.3092	8.36905
37	336.3	8.22922	8.09821	8.14666	8.22687	8.30925	8.37
36	336.4	8.22862	8.09634	8.14472	8.22631	8.30942	8.3711
35	336.5	8.22807	8.09534	8.14359	8.22574	8.30945	8.37113
34	336.6	8.22745	8.09353	8.14248	8.22477	8.30983	8.37191
33	336.7	8.22721	8.09265	8.14172	8.2247	8.31004	8.37241
32	336.8	8.22657	8.0913	8.13997	8.22391	8.31048	8.37273
31	336.9	8.22622	8.08931	8.13885	8.22332	8.31101	8.37429
30	337	8.22576	8.0887	8.13819	8.22298	8.31079	8.37457
29	337.1	8.22515	8.08651	8.13651	8.22229	8.31085	8.37531
28	337.2	8.22493	8.0852	8.13554	8.2222	8.31119	8.37613
27	337.3	8.22424	8.08408	8.13419	8.22156	8.31142	8.37639
26	337.4	8.22394	8.08223	8.13336	8.22148	8.31157	8.37702
25	337.5	8.22335	8.08109	8.1322	8.22076	8.31201	8.37743
24	337.6	8.22296	8.07993	8.13112	8.22043	8.31215	8.37852
23	337.7	8.22246	8.07826	8.13041	8.21982	8.31228	8.37899
22	337.8	8.22221	8.0776	8.12984	8.21951	8.31257	8.37966
21	337.9	8.2216	8.07586	8.12825	8.21867	8.31259	8.37992
20	338	8.22105	8.07503	8.12724	8.21816	8.31269	8.37922
19	338.1	8.22094	8.0742	8.12703	8.21818	8.31284	8.37992
18	338.2	8.2205	8.07312	8.1262	8.21741	8.31301	8.3805
17	338.3	8.22006	8.07248	8.1253	8.21689	8.31289	8.38062
16	338.4	8.21978	8.07157	8.12486	8.21649	8.31375	8.38132
15	338.5	8.21926	8.07026	8.12375	8.2159	8.31398	8.38159
14	338.6	8.21885	8.06932	8.12326	8.21552	8.31379	8.38136
13	338.7	8.21848	8.06852	8.12263	8.21508	8.31403	8.38162
12	338.8	8.21813	8.06847	8.12187	8.21474	8.31411	8.38143
11	338.9	8.21768	8.06737	8.1213	8.21406	8.31443	8.38204
10	339	8.21728	8.06578	8.12069	8.21354	8.31509	8.38179
9	339.1	8.21699	8.06556	8.12025	8.21304	8.3153	8.3817
8	339.2	8.21673	8.06475	8.11959	8.21256	8.31561	8.38207
7	339.3	8.2163	8.06413	8.1192	8.21223	8.31578	8.38213
6	339.4	8.21553	8.06291	8.11838	8.21124	8.31562	8.3824
5	339.5	8.21563	8.06299	8.11784	8.21118	8.31664	8.3834
4	339.6	8.21529	8.06254	8.1177	8.21066	8.31667	8.3833
3	339.7	8.2149	8.06162	8.11713	8.20984	8.31693	8.3834
2	339.8	8.21452	8.0609	8.11643	8.20932	8.317	8.38363
1	339.9	8.21442	8.06043	8.1166	8.209	8.31738	8.38353
0	340	8.21385	8.05991	8.1158	8.20813	8.31712	8.38376

## Sheet: co2
	age	mean	5	16	50	84	95
750	265	302.631	98.2564	139.519	263.049	476.846	644.364
749	265.1	304.713	99.3296	140.359	264.19	480	649.592
748	265.2	306.714	100.332	140.954	265.327	484.095	654.34
747	265.3	308.981	100.75	141.806	267.313	488.22	658.636
746	265.4	311.172	101.048	142.336	268.9	491.546	664.717
745	265.5	313.143	101.339	143.093	270.275	495.455	670.588
744	265.6	315.539	101.843	144.064	271.527	499.435	675.102
743	265.7	317.472	102.103	144.752	272.886	503.077	680
742	265.8	319.854	102.685	145.312	274.532	507.477	685.106
741	265.9	321.736	103.333	146.454	276.108	510.316	690.893
740	266	324.173	103.744	147.168	278.093	515.185	695.814
739	266.1	326.381	103.959	148.162	279.479	519.231	701.228
738	266.2	328.488	104.588	148.669	281.045	522.529	706.304
737	266.3	330.715	104.948	149.627	282.571	527.29	710.755
736	266.4	332.937	105.435	150.561	284.417	531.023	715.577
735	266.5	334.98	105.819	151.141	286.184	535.354	720.417
734	266.6	337.45	106.114	152	287.44	539.646	725.349
733	266.7	339.606	106.805	152.803	289.289	544.205	730.244
732	266.8	341.861	107.358	153.571	291.531	548.144	734.634
731	266.9	343.901	108.041	154.124	293.088	551.848	737.826
730	267	346.125	108.483	154.965	294.605	556.591	743.5
729	267.1	348.367	109.091	156.058	296.476	560.938	748.043
728	267.2	350.25	109.577	156.667	297.864	563.441	751.081
727	267.3	352.256	109.789	157.623	299.118	568.295	755.61
726	267.4	354.754	110.521	158.458	301.029	572.788	761.25
725	267.5	356.666	110.89	159.365	302.972	576.452	765.882
724	267.6	358.613	111.176	159.841	304.051	580.204	770.952
723	267.7	360.569	111.467	160.524	305.577	583.636	774.167
722	267.8	362.469	112.011	161.08	307.525	586.796	778.71
721	267.9	364.72	112.286	161.915	309.154	590.928	782.632
720	268	366.488	112.599	162.664	310.746	594.211	786.571
719	268.1	368.712	112.784	163.346	312.098	598.235	791.714
718	268.2	370.531	112.899	164.269	313.383	601.31	794.054
717	268.3	371.904	113.125	164.496	314.703	604.157	797.879
716	268.4	374.045	113.354	165.472	316.392	607.875	801.562
715	268.5	375.574	113.625	166.133	317.513	610.46	805.25
714	268.6	377.212	113.822	166.89	319.016	613.21	806.829
713	268.7	379.023	114.323	167.59	320.754	616.087	809.756
712	268.8	380.641	114.575	168.048	321.882	618.916	814.359
711	268.9	381.932	114.762	168.577	322.967	621.023	816.364
710	269	383.817	115.068	169.333	324.421	624.725	820.556
709	269.1	384.87	115.069	169.706	325.538	626.296	821.944
708	269.2	386.218	115.241	170.403	326.609	628	824.412
707	269.3	387.784	115.39	170.816	328.136	631.458	826.316
706	269.4	388.72	115.362	171.429	329.153	631.685	828.966
705	269.5	390.033	115.612	171.829	330.314	633.418	831.765
704	269.6	391.413	115.809	172.423	331.458	635.696	832.703
703	269.7	392.084	115.789	172.661	332.081	637.143	833.514
702	269.8	393.375	115.766	173.086	332.969	638.69	836
701	269.9	394.136	115.833	173.451	333.472	639.011	837
700	270	394.754	115.865	173.6	333.95	639.77	836.667
699	270.1	395.342	116	173.961	334.541	639.881	836.512
698	270.2	396.231	116.142	174.217	335.236	641.622	837.083
697	270.3	396.932	116.202	174.494	335.924	642.5	837.917
696	270.4	397.589	116.063	174.718	336.436	643.816	838.81
695	270.5	398	116.183	175.041	337.128	644.103	838.723
694	270.6	398.184	116.09	175.122	337.385	644	838.14
693	270.7	398.684	115.809	175.168	337.68	644.079	838.298
692	270.8	398.833	115.912	175.649	337.956	644.11	836.735
691	270.9	398.993	115.778	175.647	337.865	643.494	838.718
690	271	399.236	115.735	175.938	338.163	643.448	838.571
689	271.1	399.424	115.63	176	338.229	643.444	838
688	271.2	399.518	115.639	175.973	338.485	642.588	838
687	271.3	399.327	115.504	175.957	338.482	641.481	836.667
686	271.4	399.436	115.455	176.234	338.526	641.358	838.485
685	271.5	399.165	115.108	176.14	338.009	640.26	837.188
684	271.6	399.037	115.259	176.184	338.333	639.881	835.278
683	271.7	398.605	115.109	176.372	338.071	639.429	835.455
682	271.8	398.17	115	176.267	337.538	637.857	832.368
681	271.9	397.875	115.035	176.273	337.638	637.432	830.5
680	272	397.725	114.93	175.991	337.448	636.154	829.697
679	272.1	397.05	114.895	176	337.021	635	829.31
678	272.2	396.333	114.73	175.806	336.738	633.068	824.571
677	272.3	396.028	114.564	175.682	336.575	632.637	824.615
676	272.4	395.489	114.286	175.656	336.243	630.978	823.056
675	272.5	395.049	114.257	175.392	335.968	630.421	820.968
674	272.6	394.148	113.919	175.364	335.87	627.195	817.442
673	272.7	393.665	113.851	175.349	335.351	625.652	816.829
672	272.8	392.745	113.724	174.953	334.611	624.024	814.286
671	272.9	392.478	113.562	174.762	334.426	623.333	812.414
670	273	391.841	113.333	174.545	334	620.909	810.769
669	273.1	391.11	113.403	174.559	333.596	620	809.444
668	273.2	390.284	112.937	174.05	332.989	618.605	807.647
667	273.3	389.707	112.837	173.939	332.184	616.633	806.071
666	273.4	389.082	112.727	173.731	331.722	615.882	807.308
665	273.5	388.572	112.746	173.671	331.868	614.227	805.357
664	273.6	387.454	112.606	173.382	330.904	612.708	802.857
663	273.7	386.948	112.448	173.221	330.737	610.345	802.414
662	273.8	386.485	112.483	173.16	330.38	610.109	801.875
661	273.9	385.993	112.397	173.091	330	608.721	802.069
660	274	385.341	112.222	173.139	329.409	606.535	800.556
659	274.1	384.973	112.095	172.838	329.135	606.63	798.71
658	274.2	384.293	112.083	172.793	328.343	605.204	799.259
657	274.3	383.689	111.849	172.731	328.197	604.713	797.778
656	274.4	383.69	112	172.805	328.065	604.301	797.5
655	274.5	383.089	111.915	172.76	327.178	603.647	796.071
654	274.6	382.788	111.752	172.679	327.026	602.892	796.286
653	274.7	382.641	111.799	172.8	326.911	602.841	794.848
652	274.8	382.411	111.714	172.687	326.862	601.818	793.824
651	274.9	382.277	111.714	172.752	326.178	602.262	794.138
650	275	382.275	111.786	172.864	326.667	602.222	792.812
649	275.1	382.209	111.691	173.014	326.292	602.237	793.939
648	275.2	382.405	111.765	172.87	326.5	601.944	793.793
647	275.3	382.574	111.729	172.963	326.524	603.108	794.815
646	275.4	382.735	111.63	172.884	326.452	603	795.278
645	275.5	383.024	111.955	173.303	326.243	604.179	797.632
644	275.6	383.484	111.908	173.744	326.559	605.067	796.486
643	275.7	383.951	112.015	173.923	326.48	606.528	800.588
642	275.8	384.74	112.256	174.047	327.292	607.826	802.162
641	275.9	385.507	112.326	174.279	327.807	609.452	802.162
640	276	386.068	112.576	174.597	327.739	609.74	803.333
639	276.1	387.067	112.761	174.977	328.769	611.912	807.179
638	276.2	388.545	112.91	175.071	329.531	615.217	810.435
637	276.3	389.474	113.134	175.686	330.314	616.892	811.364
636	276.4	390.829	113.485	176.45	331.353	619.643	815.6
635	276.5	391.913	113.609	176.923	332.134	621.316	818.276
634	276.6	393.585	114.211	177.5	333.168	624.43	822.609
633	276.7	395.138	114.504	178.04	334.596	626.848	827.2
632	276.8	396.699	114.812	178.4	335.665	629.545	830.909
631	276.9	398.825	115.147	179	336.61	634.419	837.2
630	277	400.68	115.414	179.378	337.91	637.097	841.786
629	277.1	402.673	116.016	180.144	339.266	641.139	845.667
628	277.2	404.965	116.412	180.711	341.467	645.269	850
627	277.3	407.402	116.87	181.809	343.264	649.677	856.333
626	277.4	409.778	117.48	182.299	344.899	655.062	862.941
625	277.5	412.477	117.84	183.282	346.918	660.526	870.357
624	277.6	415.411	118.145	184.127	349.146	666.049	876.154
623	277.7	418.284	118.689	185.053	350.909	671.385	884.348
622	277.8	421.021	119.262	186.022	353.723	676.979	890
621	277.9	424.309	119.677	186.898	356.056	683.718	898.636
620	278	427.845	120.565	187.835	358.276	689.49	906.667
619	278.1	431.265	121.048	188.594	360.84	696.786	917.5
618	278.2	434.529	121.774	189.892	363.714	703.462	925.5
617	278.3	438.486	122.52	191.505	366.809	711.429	935.789
616	278.4	442.422	123.226	192.595	370.455	718.072	945.6
615	278.5	446.621	123.852	193.661	373.139	726.622	955.455
614	278.6	450.804	124.435	194.862	376.439	735	966.667
613	278.7	455.181	125.048	195.858	379.8	743.108	981.429
612	278.8	459.4	125.577	197.602	383.381	751.714	991
611	278.9	464.279	126.373	199.603	386.806	760.167	1002.67
610	279	468.933	127.872	200.553	390.909	769.452	1015.93
609	279.1	473.656	128.673	201.771	394.848	778	1026.15
608	279.2	479.014	129.694	203.122	398.662	789.552	1043.18
607	279.3	484.396	130.469	204.88	403.84	798.904	1055
606	279.4	489.675	131.083	206.062	406.746	808.533	1068.95
605	279.5	494.874	132.222	207.613	411.339	819.394	1084.78
604	279.6	500.745	132.957	209.351	415.82	831.207	1100.4
603	279.7	506.822	133.67	210.561	421.008	842.794	1118.33
602	279.8	512.717	134.904	211.765	425.161	854.5	1131.82
601	279.9	518.743	135.699	213.657	429.927	865.167	1147.6
600	280	524.849	136.905	214.88	435.333	877.143	1163.68
599	280.1	531.48	137.614	216.536	440.165	889.516	1181.82
598	280.2	537.529	138.69	218.158	444.561	900.167	1198.57
597	280.3	544.404	140.136	219.932	450.339	913.433	1215.56
596	280.4	551.158	141.151	221.492	455.086	927.778	1233.18
595	280.5	558.153	141.783	222.69	460.957	940.328	1254.09
594	280.6	564.774	142.124	224.172	466.033	952.679	1269.44
593	280.7	571.966	143.208	225.57	471.186	966.393	1289.47
592	280.8	579.439	144.04	227.436	477.874	981.143	1307.37
591	280.9	586.44	145	228.742	482.984	992.361	1326.67
590	281	594.098	145.93	230.405	489.068	1006.56	1348.89
589	281.1	601.521	146.988	231.701	494.766	1020	1365.65
588	281.2	609.541	148.293	233.356	500.345	1036.15	1389.47
587	281.3	616.939	149.467	235.105	505.635	1049.59	1409.44
586	281.4	625.032	150.09	236.835	512.478	1063.9	1431.33
585	281.5	632.949	150.566	238.509	518.611	1079.62	1454.67
584	281.6	640.743	151.386	240.149	524.685	1093.9	1473.04
583	281.7	649.038	152.617	242.313	530.545	1108.75	1498.1
582	281.8	656.97	153.5	244.228	536.316	1124.35	1520
581	281.9	665.523	154.356	245.683	542.925	1140.23	1543.68
580	282	673.154	154.848	247.985	548.661	1154.35	1564.09
579	282.1	682.052	155.638	250.132	555.364	1173.14	1584.74
578	282.2	690.105	156.211	251.348	561.058	1188.54	1608.57
577	282.3	698.257	157.222	253.467	567.9	1202.44	1631
576	282.4	706.914	158.202	254.859	574.095	1218.86	1656.15
575	282.5	715.541	159.375	256.691	580.882	1235	1678.46
574	282.6	723.797	160.753	258.248	586.86	1248.98	1700.63
573	282.7	732.432	161.753	260.368	593.131	1265.45	1725.33
572	282.8	740.811	162.577	261.985	599.574	1280.26	1747.33
571	282.9	748.693	163.158	264.519	605.816	1295.91	1770.67
570	283	758.186	164	266.028	612.706	1314.85	1799.17
569	283.1	766.063	164.615	267.63	618.462	1327.75	1818.24
568	283.2	774.573	165.595	269.118	625.943	1344.59	1841.43
567	283.3	782.631	166.962	271.148	631.556	1358.24	1863.33
566	283.4	791.175	167.439	272.846	638.113	1374.41	1885.45
565	283.5	799.284	167.927	274.32	644.409	1390	1908.33
564	283.6	807.608	168.588	276.279	651.17	1405.42	1931.67
563	283.7	816.611	170.225	278.231	657.327	1422.26	1957.33
562	283.8	823.865	170.723	279.597	663.371	1436.36	1975.33
561	283.9	832.414	172.022	281.304	669.479	1451.79	1996.92
560	284	839.854	172.727	282.569	675.806	1464.24	2016.92
559	284.1	847.892	173.864	284.653	682.68	1479.44	2036.47
558	284.2	855.877	174.217	286.422	688.571	1493.9	2062
557	284.3	863.39	174.831	288.571	694.556	1507.35	2079.44
556	284.4	870.817	175.882	289.914	700.471	1521.71	2098.24
555	284.5	878.36	177.073	290.857	706.047	1533.33	2120
554	284.6	886.428	178.052	292.308	712.466	1549.29	2145
553	284.7	893.076	178.608	293.854	717.564	1561.15	2160
552	284.8	899.69	178.902	295.9	723.735	1572	2180
551	284.9	906.409	179.61	297.642	728.095	1583.44	2198.89
550	285	913.128	180.8	299.091	734.625	1595.76	2212.86
549	285.1	919.84	181.37	300.099	739.342	1608	2231.11
548	285.2	926.472	182.4	301.444	744.737	1619.09	2250
547	285.3	932.492	183.378	303.191	749.75	1630	2264
546	285.4	938.296	184.143	304.95	754.861	1640	2284.44
545	285.5	944.822	184.93	306.429	760.139	1653.33	2302
544	285.6	950.515	185.479	307.308	765.278	1662.69	2318.89
543	285.7	955.182	186.456	308.077	768.873	1670.83	2331.43
542	285.8	960.163	186.901	309.4	773.175	1678.57	2343.75
541	285.9	965.239	187.397	310.667	776.885	1689.09	2355.38
540	286	970.142	188.133	312.68	781.692	1695	2365.63
539	286.1	974.873	189.028	313.814	785.075	1705.71	2375.83
538	286.2	979.331	189.571	314.536	789.643	1710.77	2386.92
537	286.3	983.136	190.423	315.667	791.905	1718.28	2395.83
536	286.4	986.529	191.429	316.556	795.156	1722.58	2402.5
535	286.5	990.818	191.923	317.753	799.516	1730	2409.17
534	286.6	992.94	192.468	318.571	801.406	1732.12	2414.44
533	286.7	995.756	192.987	319	803.667	1738.26	2419.29
532	286.8	998.383	193.333	319.882	805.625	1740.63	2421.54
531	286.9	1000.91	193.649	320.667	808.31	1744.84	2424.17
530	287	1002.82	193.889	321.136	809.571	1746.55	2428.18
529	287.1	1004.98	194.267	321.494	812.097	1750.71	2431
528	287.2	1006.29	194.4	322.174	812.985	1752.81	2430
527	287.3	1007.5	194.932	322.917	814.844	1754.62	2427.27
526	287.4	1008.4	195.205	322.99	816.795	1756.8	2426.67
525	287.5	1008.74	195.385	323.043	817.143	1756.09	2428.33
524	287.6	1008.54	195.584	323.158	818.333	1755.63	2420
523	287.7	1008.07	196	323.333	818.052	1754.55	2417.14
522	287.8	1008.01	196.4	323.077	818.077	1756.5	2410
521	287.9	1006.79	196.429	322.903	817.159	1754.48	2404.44
520	288	1004.84	196.429	322.989	817.229	1751.67	2396.25
519	288.1	1003.7	196.25	322.809	817.162	1747.5	2390
518	288.2	1001.36	196.301	322.759	815.802	1742	2383.33
517	288.3	998.642	196.667	322.527	814.886	1734.71	2367.5
516	288.4	995.63	196.486	321.91	813.103	1728.5	2354.29
515	288.5	992.151	196.364	321.538	811.765	1719	2348.33
514	288.6	989.027	196.486	321	808.947	1713.89	2332.5
513	288.7	985.424	196.234	320.349	805.921	1705.65	2322.5
512	288.8	980.679	195.663	319.56	803.951	1694.4	2305
511	288.9	975.436	195.06	318.652	800.429	1683.6	2285
510	289	970.085	194.568	317.143	796.707	1671.79	2267
509	289.1	964.289	194.444	316.489	792.875	1659.67	2252
508	289.2	958.419	194.444	315.326	788.434	1647.19	2235.56
507	289.3	953.108	193.797	314.066	784.39	1637.59	2221.43
506	289.4	945.75	193.5	312.667	779.059	1621	2196
505	289.5	938.843	193.049	310.732	774.557	1607.93	2175.56
504	289.6	931.405	192.326	309.712	769.146	1595.36	2155
503	289.7	923.596	191.628	308.485	762.771	1580.33	2130
502	289.8	915.58	191.319	307.091	757.013	1566.18	2110
501	289.9	907.398	189.583	305.833	750.263	1551.46	2083.33
500	290	898.452	189.167	303.333	743.827	1532.9	2058.18
499	290.1	888.539	187.973	301.573	736.506	1513.14	2030
498	290.2	879.299	186.962	299.652	728.78	1495.31	2003.33
497	290.3	869.59	185.976	298	721.932	1476.86	1975
496	290.4	859.974	184.235	295.686	713.614	1459.09	1948.82
495	290.5	850.454	183.256	293.942	706.237	1441.2	1925
494	290.6	838.889	182.308	292.202	697.765	1419	1895
493	290.7	828.573	181.522	289.217	689.362	1401.43	1864
492	290.8	817.794	180.319	286.909	680.75	1381.89	1838.57
491	290.9	805.919	178.286	284.86	672.118	1362.05	1806
490	291	794.448	176.571	281.818	662.935	1342.45	1775.26
489	291.1	782.95	175.128	279.741	653.708	1322.17	1747.14
488	291.2	771.446	173.933	277.25	644.719	1301.49	1715.71
487	291.3	759.698	172.796	274.561	636.047	1280.24	1681.11
486	291.4	747.881	170.978	271.724	626.593	1257.56	1652
485	291.5	735.635	169.872	268.594	617.717	1234.74	1618.33
484	291.6	723.312	168.072	266.589	607.816	1213.33	1587.86
483	291.7	711.029	166.296	263.644	597.677	1192.5	1555.33
482	291.8	698.941	163.924	260	588.286	1172.26	1525.71
481	291.9	686.506	162.809	257.721	578.868	1150.22	1495
480	292	674.212	161.474	255.242	569.182	1127.5	1460.71
479	292.1	661.789	160.098	252.131	559.065	1104.88	1431.43
478	292.2	649.435	157.531	249.343	549.123	1083.78	1402.27
477	292.3	637.129	155.862	246.276	539.76	1061.91	1370
476	292.4	624.978	154.022	243.75	530.893	1038.89	1340.5
475	292.5	612.859	152.308	241.087	521.14	1018.04	1310
474	292.6	600.529	150.625	237.922	511.667	995.893	1280
473	292.7	588.679	149.518	235.321	502.37	974.677	1252.08
472	292.8	576.835	147.711	232.885	492.923	952.787	1220.62
471	292.9	565.127	144.457	229.655	483.529	931.2	1195.91
470	293	553.389	142.718	227.029	474.702	909.012	1165.33
469	293.1	542.12	141.626	224.972	465	889.231	1137.93
468	293.2	530.903	140	222.241	456.429	869.25	1110.3
467	293.3	519.834	137.917	219.6	446.642	848.977	1083.33
466	293.4	508.751	136.095	217.514	438.367	830.179	1057.14
465	293.5	498.127	133.945	214.972	429.673	811.449	1030.67
464	293.6	487.449	132.283	212.513	420.755	792.192	1004.17
463	293.7	477.19	131.387	209.649	412.37	774.348	981.714
462	293.8	467.137	129.406	207.065	404.444	756.579	955.806
461	293.9	457.411	127.456	205.082	396.51	738.59	934.167
460	294	447.89	125.194	202.4	388.936	721.728	910.278
459	294.1	438.277	124.179	200.109	381.156	704.382	888.333
458	294.2	429.138	122.877	198.14	373.824	687.375	865.778
457	294.3	420.593	121.503	195.74	367.371	671.839	845.106
456	294.4	411.847	120.134	193.424	360.091	656.522	823.333
455	294.5	403.625	118.718	191.641	353.128	642.178	802.667
454	294.6	395.363	116.587	189.489	346.822	626.729	783.265
453	294.7	387.315	114.966	187.069	340.265	612.371	763.75
452	294.8	380.03	113.758	185.211	334.774	598.75	746.735
451	294.9	372.612	112.822	182.985	328.05	585.229	728.704
450	295	365.293	111.5	181.61	322.695	572.255	712.642
449	295.1	358.755	110.424	179.505	317.595	560.374	697.097
448	295.2	352.072	109.394	177.222	312.308	547.876	681.136
447	295.3	345.675	107.945	175.587	307.189	536.754	667.556
446	295.4	339.808	106.5	174.255	302.444	526.281	653.4
445	295.5	334.139	105.03	172.381	298.425	515.887	640.625
444	295.6	328.173	104.277	170.743	293.58	504.783	626.852
443	295.7	323.047	103.526	169.105	289.882	495.75	615.962
442	295.8	318.107	102.485	168.011	285.889	487.542	605.614
441	295.9	313.324	101.696	166.786	282.34	478.837	594.237
440	296	308.545	100.647	165.051	278.007	470.833	584.923
439	296.1	304.441	99.8734	163.604	275.092	464.083	576.129
438	296.2	300.476	99.1358	162.546	272	456.825	568.246
437	296.3	296.634	98.3537	161.244	268.902	449.919	560
436	296.4	292.969	97.5904	159.952	265.992	444.016	552.969
435	296.5	289.414	97.093	158.889	263.629	437.36	545.667
434	296.6	286.343	96.4246	157.812	261.336	432.29	539.831
433	296.7	283.37	95.9887	156.638	258.538	426.56	534.262
432	296.8	280.664	95.3261	155.592	256.8	421.923	528.077
431	296.9	278.236	94.7594	154.737	254.901	417.413	523.913
430	297	275.942	94.2703	153.868	253.24	413.657	519.726
429	297.1	273.498	93.75	153.089	250.98	408.889	515
428	297.2	271.703	93.4555	152.569	249.689	405.035	510.667
427	297.3	270.127	93.0612	151.948	248.419	403.143	507.595
426	297.4	268.419	92.7083	151.502	247.446	399.783	504.03
425	297.5	267.153	92.4747	151.123	246.452	397.429	502.381
424	297.6	266.047	92.1827	150.55	245.574	395.401	500.147
423	297.7	265.076	92.0101	150.203	244.932	393.63	498.354
422	297.8	264.259	91.9431	149.864	244.2	392.057	496.625
421	297.9	263.643	91.6355	149.462	243.946	390.638	495.844
420	298	263.23	91.6204	149.414	243.522	389.724	494.412
419	298.1	262.956	91.5349	149.404	243.627	389.925	493.636
418	298.2	262.817	91.4486	148.947	243.489	390	494
417	298.3	262.64	91.4286	148.831	243.814	388.667	492.167
416	298.4	262.925	91.3825	148.793	244.131	389.771	494.328
415	298.5	263.161	91.4027	148.697	244.67	390.213	495.147
414	298.6	263.804	91.5766	148.918	245.253	390.853	497.231
413	298.7	264.1	91.5068	148.912	245.501	390.813	497.222
412	298.8	265.008	91.8142	149.163	246.168	392.937	498.875
411	298.9	265.804	91.8502	149.567	247.143	394.06	500.893
410	299	266.879	92.1459	149.62	248.011	395.781	504.762
409	299.1	267.71	92.1795	149.916	248.905	397.132	505.781
408	299.2	268.882	92.3009	150.291	250.213	399.37	508.986
407	299.3	270.421	92.4107	150.493	251.031	402.689	513.22
406	299.4	271.745	92.5	150.986	252.299	404.109	515.97
405	299.5	273.259	92.6389	151.212	253.881	406.978	518.636
404	299.6	274.834	92.723	151.751	255.565	409.722	522.83
403	299.7	276.608	93.0233	152.211	256.89	413.333	528.222
402	299.8	278.295	93.3333	152.806	258.488	416.149	532.045
401	299.9	280.065	93.3971	153.249	260.139	418.658	536.923
400	300	282.036	93.5266	153.81	261.377	422.977	541.538
399	300.1	284.045	93.9	154.343	262.844	426.861	546.5
398	300.2	286.274	94.1709	155.115	264.669	430.73	551.905
397	300.3	288.208	94.4221	155.681	266.41	434.435	555.778
396	300.4	290.454	94.8744	156.437	268.746	438.154	561.22
395	300.5	292.419	95.1309	157.054	270.315	442.137	566.17
394	300.6	294.905	95.5615	157.821	272.251	446.349	570.263
393	300.7	296.931	95.847	158.502	274.161	449.632	575.435
392	300.8	299.273	96.0674	159.152	276.293	453.866	581.064
391	300.9	301.613	96.4088	159.683	277.874	458.615	587.174
390	301	303.86	96.6102	160.301	279.929	462.609	591.111
389	301.1	306.383	97.2159	160.742	282.466	467.805	596.667
388	301.2	308.527	97.4269	161.325	284.167	471.429	600.222
387	301.3	310.91	98.0473	162.042	286.35	475.625	607.273
386	301.4	313.174	98.1818	162.368	288.248	479.73	613.721
385	301.5	315.356	98.7261	163.134	290.22	484.144	616.739
384	301.6	317.847	98.9506	163.899	292.209	488.362	622.683
383	301.7	320.123	99.3671	164.45	294.427	492.653	628
382	301.8	322.307	99.625	165.048	296.245	496.552	633.404
381	301.9	324.431	99.7561	165.805	297.923	499.844	638.293
380	302	326.512	99.9379	166.316	299.611	504.017	642.8
379	302.1	328.645	100.303	166.878	301.44	507.833	648.889
378	302.2	330.695	100.61	167.7	303.41	511.651	653.019
377	302.3	332.719	100.637	168.15	304.925	515.225	659.111
376	302.4	334.558	101.161	168.607	306.64	519.419	662.778
375	302.5	336.55	101.519	169.3	308.123	522.25	667.143
374	302.6	338.339	101.688	170	309.807	525.196	672.308
373	302.7	340.057	101.859	170.293	310.968	528.925	675.106
372	302.8	341.508	102.105	170.633	313.03	530.485	676.875
371	302.9	343.234	102.467	171.026	314.034	533.667	682.273
370	303	344.814	102.583	171.46	315.56	536.311	684.884
369	303.1	346.125	102.922	171.806	316.356	538.584	687.273
368	303.2	347.377	103.067	172	317.322	541.466	690.417
367	303.3	348.63	103.333	172.402	318.793	543.455	691.569
366	303.4	349.557	103.267	172.783	319.27	545.413	693.833
365	303.5	350.814	103.537	172.906	320.249	547.217	696.458
364	303.6	351.721	103.446	173.096	320.995	549.083	698.039
363	303.7	352.551	103.605	173.542	321.518	550.5	700.811
362	303.8	353.259	103.741	173.613	322.564	551.967	701.25
361	303.9	353.874	103.851	173.901	322.865	553.917	702.973
360	304	354.428	103.973	174.208	323.512	555.575	704.348
359	304.1	354.844	103.716	174.332	324.028	555.702	705
358	304.2	355.255	103.819	174.439	324.223	557.08	705.5
357	304.3	355.584	103.986	174.525	324.804	557.545	706.512
356	304.4	355.561	104.014	174.641	324.663	557.931	705.61
355	304.5	355.627	104.014	174.57	324.682	558.519	705.75
354	304.6	355.661	104.043	174.511	324.932	558.738	704.857
353	304.7	355.413	103.944	174.457	324.5	559.053	704.634
352	304.8	355.123	103.916	174.511	324.367	558.058	703.684
351	304.9	355.043	103.852	174.468	324.159	559.082	703.721
350	305	354.404	103.778	174.415	323.167	557.619	702.093
349	305.1	354.219	103.835	174.372	323.125	557.961	701.667
348	305.2	353.498	103.835	174.064	322.532	557.757	699.697
347	305.3	352.685	103.788	174.239	321.354	555.872	697.333
346	305.4	352.058	103.731	174.084	320.841	555.229	695
345	305.5	351.327	103.806	174.031	320.172	554.273	693.265
344	305.6	350.489	103.778	173.795	319.5	552.844	691.818
343	305.7	349.536	103.824	173.827	318.707	551.373	688.667
342	305.8	348.403	103.456	173.43	317.529	549.703	686.364
341	305.9	347.141	103.571	173.365	316.381	547.053	682.889
340	306	346.058	103.286	173.16	315.37	544.274	681.136
339	306.1	344.807	103.116	172.972	314.343	543.153	676.739
338	306.2	343.487	103.38	172.824	313.429	540.439	672.889
337	306.3	342.307	103.262	172.546	312.122	538.607	670.455
336	306.4	340.848	102.941	172.364	310.717	535.63	667.407
335	306.5	339.524	102.643	171.991	309.331	533.084	663.061
334	306.6	338.132	102.59	171.674	307.964	530.495	660.625
333	306.7	336.495	102.482	171.3	306.766	527.982	656.6
332	306.8	334.892	102.394	171.073	304.913	525.094	653.137
331	306.9	333.212	102.286	170.708	303.772	521.359	648.958
330	307	332.016	101.985	170.211	302.448	519.483	645.686
329	307.1	330.063	102.059	170.083	301.196	515.812	640.851
328	307.2	328.386	101.957	169.744	299.46	513.874	636.667
327	307.3	326.826	101.929	169.681	297.993	510.619	633.243
326	307.4	324.981	101.844	169.128	296.679	506.97	628.163
325	307.5	323.663	101.806	168.806	295.314	505.14	626.222
324	307.6	321.619	101.575	168.169	293.569	501.129	621.228
323	307.7	320.09	101.37	167.798	292.5	498.365	616.792
322	307.8	318.049	101.149	166.835	290.749	494.196	613.519
321	307.9	316.411	100.94	166.533	289.348	491.583	608.571
320	308	314.572	100.795	166.034	287.684	487.273	603.958
319	308.1	312.786	100.577	165.84	286.197	484.394	599.615
318	308.2	311.101	100.44	165.404	284.966	481.756	593.59
317	308.3	309.501	100.366	164.898	283.434	477.737	590.408
316	308.4	307.756	100.122	164.52	281.894	474.667	586.19
315	308.5	305.994	99.8788	164.18	280.271	471.21	581.4
314	308.6	304.486	99.8193	163.78	279.338	468.421	577.586
313	308.7	302.579	99.5266	163.216	277.604	465.106	573.654
312	308.8	300.988	99.4152	162.907	276.386	462.097	568.793
311	308.9	299.23	99.2982	162.462	275.049	457.682	564.118
310	309	297.571	99.023	161.971	273.738	455.235	560.667
309	309.1	296.165	98.8701	161.552	272.558	452.714	557.5
308	309.2	294.346	98.6034	160.772	271.303	449.708	552.5
307	309.3	292.856	98.5876	160.523	269.872	446.62	548.214
306	309.4	291.415	97.9235	160.242	268.725	443.333	545
305	309.5	289.8	97.9459	159.79	267.348	439.936	540.357
304	309.6	288.179	97.7297	159.331	265.943	437.552	535.965
303	309.7	286.893	97.4586	158.824	265.113	435.203	533.051
302	309.8	285.37	97.3224	158.252	263.987	431.985	528.904
301	309.9	284.303	97.1823	157.826	262.941	429.937	527.049
300	310	282.805	97.0652	157.373	261.656	427.61	522.759
299	310.1	281.552	96.7914	156.84	260.752	425.329	518.75
298	310.2	280.308	96.5775	156.292	259.419	423.419	516.571
297	310.3	279.261	96.2827	155.821	258.658	421.447	513.167
296	310.4	278.089	96.117	155.398	257.452	419.197	511.563
295	310.5	276.916	96.0638	155.068	256.678	416.466	508.267
294	310.6	275.889	95.8947	154.658	255.914	414.275	505.89
293	310.7	274.791	95.5556	154.43	254.548	412.313	503.056
292	310.8	273.841	95.445	154.116	253.785	410.496	501.975
291	310.9	272.768	95.1852	153.622	252.994	408.062	499.726
290	311	272.194	95.1064	153.599	252.268	407.355	498.442
289	311.1	271.279	94.9738	153.125	251.582	405.14	496.4
288	311.2	270.451	94.7895	152.867	250.87	403.025	494.143
287	311.3	269.684	94.5026	152.574	250.301	401.453	493.288
286	311.4	268.942	94.3915	152.186	249.455	400.238	491.549
285	311.5	268.322	94.3158	151.721	248.991	398.417	490.649
284	311.6	267.815	94.1327	151.65	248.558	397.664	490
283	311.7	267.227	93.9086	151.325	247.882	396.028	489.868
282	311.8	266.633	93.6181	151.136	247.194	394.932	488.182
281	311.9	266.291	93.6224	151.038	246.806	394.306	487.429
280	312	265.98	93.5468	151.084	246.429	393.099	488.235
279	312.1	265.631	93.35	150.694	246.103	392.273	487.541
278	312.2	265.517	93.3838	150.603	246.049	391.667	488.571
277	312.3	265.205	93.0653	150.482	245.642	391.232	487.869
276	312.4	265.084	92.9744	150.536	245.533	390.567	488.197
275	312.5	264.93	92.8718	150.5	245.241	390.155	489.31
274	312.6	264.825	92.8061	150.349	245.299	389.342	488.846
273	312.7	264.712	92.85	150.159	245.18	388.792	490.154
272	312.8	264.82	92.7919	150.282	245.09	389.079	490.794
271	312.9	264.629	92.7273	150.252	244.894	388.523	491.148
270	313	264.84	92.7411	150.222	244.94	388.506	492.258
269	313.1	264.955	92.5773	150.222	244.825	389.514	493.065
268	313.2	265.299	92.75	150.343	245.556	389.189	494.154
267	313.3	265.54	92.6531	150.377	245.307	390.36	495.821
266	313.4	265.779	92.6531	150.191	245.573	390.89	496.716
265	313.5	266.159	92.8061	150.469	246.024	391.151	498.644
264	313.6	266.583	92.6425	150.683	246.258	391.894	500.984
263	313.7	267.034	92.732	150.619	246.698	393.116	501.667
262	313.8	267.426	92.7179	150.895	247.07	393.806	504.333
261	313.9	267.904	92.8061	151.012	247.259	395	505.538
260	314	268.508	92.7835	151.339	247.788	395.85	507.576
259	314.1	269.256	92.8042	151.364	248.148	397.77	509.839
258	314.2	269.792	92.9167	151.589	248.401	398.69	512
257	314.3	270.599	93	151.646	248.896	400.851	514.909
256	314.4	271.312	93.089	151.774	249.477	401.364	517.647
255	314.5	271.921	93.2642	151.867	249.845	401.938	519.649
254	314.6	272.951	93.3846	152.134	250.403	404.692	521.636
253	314.7	273.665	93.4872	152.248	250.842	405.714	525.077
252	314.8	274.355	93.5751	152.32	251.541	406.777	526.471
251	314.9	275.358	93.7056	152.567	252.28	408.281	528.923
250	315	276.171	93.9175	152.837	252.792	410.185	531.356
249	315.1	277.156	94.1146	153.021	253.502	411.273	534.444
248	315.2	277.984	94.1538	153.183	253.974	413.333	536.812
247	315.3	279.201	94.2932	153.636	255	415.267	538.889
246	315.4	280.322	94.6114	153.794	255.793	416.769	543.86
245	315.5	281.285	94.709	154.042	256.483	419.12	546.491
244	315.6	282.265	94.8421	154.296	257.333	420.901	548.769
243	315.7	283.446	95.0543	154.607	258.018	422.975	552.982
242	315.8	284.608	95.2432	154.776	258.86	425.424	556.607
241	315.9	285.636	95.3039	155.078	259.849	427.222	561.25
240	316	286.926	95.5866	155.385	260.732	429.327	563.333
239	316.1	287.857	95.7143	155.412	261.34	431.053	566.667
238	316.2	289.1	96.0241	155.714	262.421	433.1	569.592
237	316.3	290.207	96.1765	156.091	263.21	434.476	573.019
236	316.4	291.328	96.4198	156.255	264.056	436.306	576.545
235	316.5	292.431	96.646	156.27	264.794	438.857	579.02
234	316.6	293.604	96.8354	156.57	265.605	440.825	583.137
233	316.7	294.739	97.2848	157.039	266.552	442.609	587.609
232	316.8	295.944	97.3826	157.424	267.166	445.155	590.208
231	316.9	296.961	97.6027	157.5	268	446.979	593.636
230	317	298.173	97.7622	157.749	268.671	449.175	596.731
229	317.1	299.294	98.2482	158	269.646	451.358	599.362
228	317.2	300.477	98.5401	158.259	270.24	453.457	602.766
227	317.3	301.553	98.6861	158.591	271.131	455.698	606.5
226	317.4	302.445	98.8148	158.455	271.528	458.298	609.25
225	317.5	303.43	99.0441	158.807	272.042	459.674	612.5
224	317.6	304.434	99.3284	159.045	272.526	461.351	614.51
223	317.7	305.544	99.4776	159.273	273.716	464.937	617.551
222	317.8	306.416	99.6212	159.05	274.281	466.538	620.6
221	317.9	307.303	99.6296	159.224	274.952	468.214	622.759
220	318	308.168	99.9275	159.315	275.563	469.524	625.556
219	318.1	308.977	100.156	159.302	276.013	471.22	629.318
218	318.2	309.614	100.105	159.358	276.386	471.644	631.296
217	318.3	310.379	100.262	159.488	277.019	473.494	633.696
216	318.4	311.181	100.266	160	277.603	474.643	636.25
215	318.5	311.776	100.372	159.859	278.026	476.465	638.163
214	318.6	312.317	100.495	160	278.294	477.391	640.227
213	318.7	313.003	100.437	159.765	278.709	478.021	643.5
212	318.8	313.596	100.782	160.246	279.349	479.101	645.789
211	318.9	313.904	100.674	160.12	279.36	480	647.317
210	319	314.259	100.756	160.119	279.789	480.562	649.535
209	319.1	314.631	100.702	159.951	279.861	481.325	652.5
208	319.2	314.708	100.778	159.859	279.758	481.375	653.571
207	319.3	315.002	100.828	159.905	279.703	483.415	655.366
206	319.4	315.114	101.03	160.116	279.637	483.429	656.486
205	319.5	315.264	101.012	160	279.835	484.177	657.027
204	319.6	315.237	100.915	159.953	279.223	485.422	658.056
203	319.7	315.193	100.854	159.567	279.295	485	658.421
202	319.8	315.016	100.875	159.612	278.585	484.878	658.636
201	319.9	314.879	100.904	159.471	278.123	484.835	659.75
200	320	314.666	100.92	159.333	277.814	485.275	660.25
199	320.1	314.386	100.812	159.1	277.523	484.348	661.429
198	320.2	313.817	100.692	158.786	276.73	483.864	660.312
197	320.3	313.547	100.705	158.551	276.375	483.614	661.515
196	320.4	313.084	100.645	158.565	275.868	483.034	661.143
195	320.5	312.455	100.385	158.421	274.984	481.446	662.195
194	320.6	311.836	100.39	158.341	274.272	480.698	661.842
193	320.7	311.147	100.316	157.82	273.738	478.929	660
192	320.8	310.25	100.195	157.477	272.919	476.9	658.571
191	320.9	309.526	100	157.248	272.45	475.789	657.333
190	321	308.566	100.062	156.56	271.065	475.109	656.296
189	321.1	307.404	100.061	156.291	270.34	473.068	652.667
188	321.2	306.498	99.9265	155.991	269.791	471.477	650
187	321.3	305.412	99.7761	155.43	268.161	470.11	648.864
186	321.4	304.164	99.4118	154.955	267.231	467.123	647.778
185	321.5	302.868	98.9781	154.405	266.038	465.57	645.625
184	321.6	301.602	98.8971	154	264.907	463	643.103
183	321.7	300.426	98.6667	153.455	263.77	461.519	640.345
182	321.8	299.065	98.3212	152.84	262.378	459.31	637.353
181	321.9	297.655	98	152.386	260.859	455.714	635.455
180	322	296.118	97.3973	151.891	259.485	453.506	631.842
179	322.1	294.628	97.3103	150.919	258.123	450.8	627.576
178	322.2	293.109	97.0345	150.43	256.884	447.879	623.462
177	322.3	291.484	96.6197	149.205	255.854	445.286	618.333
176	322.4	289.758	95.9864	148.543	254.217	442.179	614.848
175	322.5	288.11	95.6291	147.831	252.408	439.067	610.303
174	322.6	286.422	95	146.957	250.682	436.538	606.25
173	322.7	284.698	94.6835	146.067	249.009	433.014	600.333
172	322.8	282.885	94.1772	145.448	247.578	430.137	597.5
171	322.9	281.127	93.6774	144.699	246.122	427.284	593.437
170	323	279.339	93.3951	143.91	244.777	424.156	589.722
169	323.1	277.246	92.6901	142.598	243.011	420.824	584.687
168	323.2	275.504	92.2989	141.953	241.401	417.711	581.333
167	323.3	273.571	91.8497	141.439	239.666	413.78	577.059
166	323.4	271.531	91.4917	140.193	238.072	409.574	572.821
165	323.5	269.707	91.0995	139.294	236.187	406.162	568.478
164	323.6	267.719	90.7614	138.504	234.634	402.745	563.947
163	323.7	265.902	90.4082	137.71	232.883	399.278	561.25
162	323.8	263.853	89.7531	136.72	230.9	395.4	556
161	323.9	261.908	89.3939	135.823	229.284	391.327	553.333
160	324	259.822	88.7647	135.179	227.416	387.619	547.778
159	324.1	257.896	88.0814	134.007	225.84	383.431	545.172
158	324.2	256.022	87.4302	133.394	224.058	379.286	540
157	324.3	253.927	87.1585	132.652	222.321	375.963	534.865
156	324.4	252.042	86.5405	131.835	220.543	371.837	531.316
155	324.5	250.117	86.1622	130.825	219.011	368.818	525.641
154	324.6	247.996	85.914	130.196	217.443	364.622	522.857
153	324.7	246.116	85.3061	129.102	216.005	361.849	516.829
152	324.8	244.053	84.8205	128.245	214.332	357.121	510.741
151	324.9	242.188	84.1451	127.16	212.837	354.496	507.805
150	325	240.112	83.6816	126.324	210.948	349.618	503.235
149	325.1	238.35	83.2195	125.547	209.406	346.074	500.833
148	325.2	236.452	82.8037	124.906	208.259	341.984	494.333
147	325.3	234.535	82.5	124.088	206.876	338.662	490.571
146	325.4	232.751	82.2907	123.091	205.698	335.324	486
145	325.5	230.72	81.8103	122.218	203.941	331.838	480.345
144	325.6	229.105	81.3025	121.454	202.766	328.428	477.568
143	325.7	227.26	80.9283	120.681	201.518	325.414	472.581
142	325.8	225.422	80.3265	120.135	199.869	322.394	468.378
141	325.9	223.587	80.0794	119.644	198.552	318.773	465.833
140	326	221.924	79.7765	119.076	197.681	316.41	462
139	326.1	220.213	79.2391	118.562	196.306	313.268	457.586
138	326.2	218.412	78.7047	117.823	194.965	309.898	453.056
137	326.3	216.896	78.25	117.282	193.612	307.231	448.571
136	326.4	215.23	77.7778	116.58	192.235	305.337	444.857
135	326.5	213.843	77.5598	116.045	191.233	302.41	442.593
134	326.6	211.981	76.8246	115.325	190.133	298.945	437.027
133	326.7	210.577	76.5877	114.892	188.978	297	434.667
132	326.8	209.094	76.2441	114.307	187.773	295.178	429.767
131	326.9	207.502	75.6889	113.779	186.644	292.99	426.316
130	327	206.023	75.354	113.324	185.491	290.263	423.25
129	327.1	204.558	75.087	112.73	184.562	287.788	418.5
128	327.2	203.218	74.6809	112.064	183.536	285.742	415.366
127	327.3	201.876	74.3621	111.802	182.418	283.738	412.308
126	327.4	200.627	74.0161	111.592	181.293	281.866	409.556
125	327.5	199.357	73.7647	111.274	180.28	279.814	406.19
124	327.6	198.057	73.3858	110.917	179.425	277.674	403.913
123	327.7	196.948	73.0469	110.569	178.323	275.99	402.222
122	327.8	195.7	72.8958	110.341	177.61	273.871	398.25
121	327.9	194.613	72.6894	109.83	176.886	272.174	395
120	328	193.223	72.3485	109.654	175.688	270.3	393.235
119	328.1	192.303	72.0992	109.454	175.195	268.879	390
118	328.2	191.312	71.8077	108.955	174.615	267.34	387.586
117	328.3	190.216	71.7375	108.489	173.859	265.619	383.143
116	328.4	189.082	71.5649	108.338	172.894	263.401	381.111
115	328.5	188.294	71.5849	108.22	172.386	262.216	380
114	328.6	187.448	71.3704	107.663	171.947	261.111	377.143
113	328.7	186.447	71.1111	107.319	171.224	259.389	373.704
112	328.8	185.482	70.9225	107.037	170.797	258.122	370.811
111	328.9	184.806	70.6589	106.752	170.47	257.169	367.5
110	329	183.919	70.4706	106.667	170.02	255.815	364.286
109	329.1	183.13	70.3125	106.354	169.568	255.117	361.818
108	329.2	182.402	70.4135	106.138	169.412	253.687	359.355
107	329.3	181.708	70.4797	106.132	169.131	252.788	356.25
106	329.4	181.054	70.2952	105.98	168.768	251.643	353.714
105	329.5	180.269	69.9163	105.561	168.273	250.599	351.212
104	329.6	179.853	69.9587	105.522	168.259	250.357	349
103	329.7	179.408	69.875	105.564	168.228	249.298	346.429
102	329.8	178.712	69.7521	105.304	167.772	248.362	343.333
101	329.9	178.331	69.8765	105.025	167.852	247.692	340.513
100	330	177.751	69.7934	104.808	167.619	246.905	337.838
99	330.1	177.365	70.0361	105.037	167.452	246.417	334.884
98	330.2	176.934	70.0355	104.832	167.46	246	331.556
97	330.3	176.666	70.0357	104.893	167.518	245.608	331.034
96	330.4	176.234	69.7925	104.779	167.5	245.038	326.833
95	330.5	176.021	69.6341	104.696	167.637	244.885	325.645
94	330.6	175.732	69.7917	104.563	167.694	244.286	322.903
93	330.7	175.318	69.75	104.434	167.278	243.486	320.741
92	330.8	175.135	69.7881	104.375	167.581	243.138	319.254
91	330.9	174.997	69.7881	104.263	167.789	243.016	318.852
90	331	174.862	69.6234	104.251	167.602	242.824	316.818
89	331.1	174.764	69.749	104.295	167.749	242.557	315
88	331.2	174.612	69.668	104.225	167.535	242.434	315.231
87	331.3	174.565	69.5918	104.174	167.78	242.509	314.167
86	331.4	174.548	69.5122	104.392	167.956	242.528	313.478
85	331.5	174.511	69.3496	104.133	167.809	243.048	312.838
84	331.6	174.459	69.246	104.131	168.024	242.883	311.429
83	331.7	174.659	69.1339	104.276	168.004	243.357	312.034
82	331.8	174.548	69.1051	104.324	168.073	243.706	310.192
81	331.9	174.66	69.0438	104.439	168.056	243.943	310.185
80	332	174.862	69.0119	104.6	168.556	244.424	311.25
79	332.1	174.889	68.8803	104.68	168.911	244.786	311.077
78	332.2	175.13	68.8538	104.703	168.816	245.471	312.623
77	332.3	175.261	68.7984	104.732	169.126	246.284	313.175
76	332.4	175.548	68.7308	104.746	169.395	247.016	314.516
75	332.5	175.857	68.6973	104.626	169.3	247.953	316.765
74	332.6	175.994	68.8189	104.478	169.396	247.955	316.935
73	332.7	176.275	68.7938	104.588	169.634	248.64	317.759
72	332.8	176.641	68.7891	104.384	169.81	249.843	319.298
71	332.9	176.802	68.5547	104.134	169.75	250.763	320.392
70	333	177.261	68.5606	104.174	169.487	251.88	322.093
69	333.1	177.475	68.5496	103.934	169.657	252.683	323.111
68	333.2	177.905	68.4586	103.791	169.789	253.551	324.082
67	333.3	178.246	68.5	103.824	169.752	254.118	326.25
66	333.4	178.674	68.5659	103.48	170.228	254.898	327.959
65	333.5	179.016	68.6434	103.415	170.39	255.679	327.895
64	333.6	179.535	68.5938	103.348	170.424	256.71	328.75
63	333.7	179.724	68.5992	103.112	170.6	256.766	328.955
62	333.8	180.33	68.6614	102.932	170.725	258.154	330.588
61	333.9	180.659	68.6047	102.754	171.055	258.858	330.893
60	334	181.158	68.6667	102.793	171.317	259.772	333.333
59	334.1	181.671	68.75	102.735	171.587	261.486	334.429
58	334.2	182.279	68.8327	102.772	172.06	262.524	337.073
57	334.3	182.603	68.902	102.522	172.514	263.476	337.727
56	334.4	183.094	68.8976	102.386	172.94	264.634	338.4
55	334.5	183.627	68.9723	102.447	173.321	266.351	339.815
54	334.6	184.14	68.8538	102.386	173.829	267.5	342
53	334.7	184.529	68.9328	102.171	174.273	268.178	343.977
52	334.8	185.105	68.9286	102.073	175.028	269.45	346
51	334.9	185.61	68.7597	101.834	175.223	270.556	346.991
50	335	186.194	68.7891	101.719	175.624	272.684	348.899
49	335.1	186.745	68.6873	101.553	176.082	274.115	351.304
48	335.2	187.278	68.5441	101.481	176.549	275.579	352.475
47	335.3	187.846	68.6381	101.359	176.968	277.135	354.615
46	335.4	188.456	68.6561	101.279	177.347	278.851	356.777
45	335.5	188.766	68.7008	101.259	177.626	279.615	357.542
44	335.6	189.395	68.7352	101.09	178.286	281.136	359.344
43	335.7	189.878	68.8095	101.01	178.71	282.76	361.038
42	335.8	190.271	68.7747	100.714	179.119	284.078	362.5
41	335.9	190.808	68.7402	100.513	179.486	285.081	364.071
40	336	191.396	68.92	100.611	179.958	286.264	366.091
39	336.1	191.836	68.8583	100.468	180.219	287.874	367.568
38	336.2	192.213	68.7259	100.397	180.483	288.982	368.522
37	336.3	192.79	68.6822	100.276	181.042	290.529	369.291
36	336.4	193.332	68.5283	100.256	181.312	292.287	371.714
35	336.5	193.807	68.3764	100.132	181.621	293.706	373.913
34	336.6	194.48	68.3088	100.054	181.938	295.141	374.815
33	336.7	194.712	68.4815	99.9725	181.897	295.593	375.175
32	336.8	195.243	68.2721	99.8347	182.362	297.083	377.03
31	336.9	195.696	68.2482	99.6757	182.456	298.152	378.3
30	337	196.079	68.1227	99.6206	182.505	298.906	380.093
29	337.1	196.712	68.0935	99.5856	183.101	300.663	380.882
28	337.2	196.893	67.8596	99.5355	183.175	301.124	381.196
27	337.3	197.577	67.9021	99.458	183.313	303.041	383.168
26	337.4	197.893	67.6792	99.3531	183.706	303.728	383.846
25	337.5	198.385	67.5932	99.4102	183.817	304.862	384.954
24	337.6	198.801	67.4247	99.3085	184.105	305.866	385.826
23	337.7	199.139	67.5082	99.2781	184.214	307.069	385.948
22	337.8	199.503	67.3968	99.2954	184.437	307.654	387.632
21	337.9	200.046	67.2812	99.1826	184.696	308.957	388.44
20	338	200.496	67.3397	99.2541	184.979	309.607	389.528
19	338.1	200.671	67.1656	99.2655	185.18	309.894	389.821
18	338.2	201.117	67.1746	99.2394	185.399	310.765	391.277
17	338.3	201.463	67.2669	99.2857	185.632	311.944	391.957
16	338.4	201.807	67.1338	99.1714	185.794	312.857	392.444
15	338.5	202.232	67.2459	98.9415	186.457	313.621	393.373
14	338.6	202.573	67.3267	99.0028	186.78	314.083	394.524
13	338.7	202.871	67.4172	98.8587	186.957	314.696	395.464
12	338.8	203.257	67.4419	98.9444	187.146	315.978	396.154
11	338.9	203.595	67.4333	98.9891	187.287	316.514	397.157
10	339	203.998	67.4576	98.8089	187.908	317.273	397.5
9	339.1	204.242	67.3898	98.8462	188.113	318.156	398.1
8	339.2	204.512	67.4394	98.9489	188.213	318.652	398.269
7	339.3	204.835	67.4823	98.8462	188.529	319.08	399.223
6	339.4	205.448	67.7338	98.8564	188.98	320.508	400.115
5	339.5	205.547	67.5627	98.7968	189.026	320.929	401.262
4	339.6	205.755	67.554	98.7831	189.537	321.087	400.851
3	339.7	206.179	67.6619	98.8624	190.025	321.921	401.667
2	339.8	206.496	67.9336	98.7566	190.179	322.247	401.585
1	339.9	206.603	67.9182	98.6398	190.158	322.159	401.928
0	340	207.024	68.0075	98.7121	190.597	322.976	401.829

## Sheet: dic
	age	mean	5	16	50	84	95
750	265	1618.89	622.593	944.364	1526.36	2352.12	2715.24
749	265.1	1620.15	620	942.407	1525.56	2356	2719.05
748	265.2	1621.2	617.857	941.071	1524.44	2360.51	2724.5
747	265.3	1622.35	615.357	940.323	1523.49	2363.79	2728.18
746	265.4	1623.6	614.286	937.5	1522.73	2368.24	2733.85
745	265.5	1624.36	611.724	935	1521.33	2372.93	2737.65
744	265.6	1625.84	608.889	933.542	1522.5	2375.68	2743.33
743	265.7	1626.69	607.714	931.633	1522.94	2379.12	2747.65
742	265.8	1628	606.471	929.556	1522.16	2383.17	2752.5
741	265.9	1628.66	605	927.727	1522.37	2385.61	2758
740	266	1630.19	602.5	925.714	1523.64	2390.98	2763.33
739	266.1	1631.28	602.083	923.684	1523.85	2394	2766.82
738	266.2	1632.26	600.769	922.432	1523.75	2398.67	2773.33
737	266.3	1633.7	599.2	921.081	1525	2402.04	2780
736	266.4	1634.6	598.182	918.571	1525.88	2404.88	2782.73
735	266.5	1635.42	595.769	917.609	1525.8	2407.86	2785.91
734	266.6	1636.93	594.815	916.75	1526.67	2412	2792.5
733	266.7	1638.03	593.448	914.39	1526.3	2416.18	2796.52
732	266.8	1639.13	591.538	913.077	1526.58	2419.14	2801.43
731	266.9	1640.03	589.643	911.951	1526.83	2421.61	2807.27
730	267	1641.1	588.333	910.465	1527.27	2426.06	2811.58
729	267.1	1642.2	587.5	908.214	1527.91	2428.86	2815.79
728	267.2	1643.04	586.5	906.667	1527.83	2430.94	2818.42
727	267.3	1644.04	585.238	905.69	1529.13	2434.39	2825.38
726	267.4	1645.45	585.238	904.912	1529.8	2438.26	2830
725	267.5	1646.43	583.333	903.833	1530	2442	2833.33
724	267.6	1647.42	582.381	903.269	1530	2444.77	2840.43
723	267.7	1648.39	580.476	902.222	1531	2448.06	2842.27
722	267.8	1649.18	580	901.042	1531.54	2450.49	2846.11
721	267.9	1650.49	579.167	899.796	1533	2453.71	2851.05
720	268	1651.18	577.917	898.98	1533.64	2455.95	2854
719	268.1	1652.28	577.826	897.6	1534.87	2459.39	2857.78
718	268.2	1653.48	577.391	896.296	1535.95	2461.21	2860.63
717	268.3	1654.04	577.143	895.932	1536.43	2463.55	2864.12
716	268.4	1655.19	576.25	895.556	1537.25	2465.59	2867.83
715	268.5	1655.74	575	894.167	1537.05	2467.5	2871.5
714	268.6	1656.78	575	893.077	1538.48	2471	2876
713	268.7	1657.58	572.5	892.642	1538.09	2472.97	2879.05
712	268.8	1658.5	572.353	892.807	1539.32	2474.24	2883.5
711	268.9	1659.1	571.333	892.373	1540.23	2475	2885.91
710	269	1660.27	571.875	892.167	1540.49	2478.93	2891.25
709	269.1	1660.75	571.25	891.967	1541.96	2480.24	2892.61
708	269.2	1661.53	570	891.379	1542.55	2481.43	2895.88
707	269.3	1662.49	571.5	890.377	1543.33	2482.68	2898.64
706	269.4	1662.95	571.5	890.577	1544.22	2483.42	2899.55
705	269.5	1663.66	569.6	890.408	1544.65	2484.42	2903.64
704	269.6	1664.4	570	889.792	1545.56	2486.1	2905.71
703	269.7	1664.79	569.565	889.167	1546.05	2486.34	2907.5
702	269.8	1665.59	569.545	888.936	1547.43	2488.21	2910
701	269.9	1666.09	569.565	888.6	1548.21	2488.12	2911.76
700	270	1666.6	570	889.2	1549.19	2488.6	2913.57
699	270.1	1666.86	570	888.654	1550.2	2488.57	2913.85
698	270.2	1667.58	569.565	887.963	1550.93	2491.11	2915.62
697	270.3	1667.94	570	888.214	1552.13	2491.43	2917.65
696	270.4	1668.79	570	888.246	1552.62	2493.03	2919.29
695	270.5	1668.87	570	888.113	1552.11	2493.55	2920
694	270.6	1669.1	570	888.302	1552.89	2494	2918.42
693	270.7	1669.62	570	888.462	1553.08	2495	2919.47
692	270.8	1669.78	570.8	888.8	1553.5	2495.13	2920
691	270.9	1669.94	571.154	888.654	1553.61	2495.14	2921.25
690	271	1670.31	571.538	888.846	1554.38	2494.69	2919.57
689	271.1	1670.85	571.852	889.592	1554.41	2495.29	2921.76
688	271.2	1671.02	572.083	889.787	1555	2495.5	2923.16
687	271.3	1671.2	572.609	890.339	1555.68	2494.72	2921.33
686	271.4	1671.36	573.2	890.333	1556.32	2495.59	2922.78
685	271.5	1671.59	573.929	890.508	1556.05	2495.56	2922.94
684	271.6	1671.61	574.231	890.727	1556.58	2495.31	2922.67
683	271.7	1671.61	574.583	891.111	1557.11	2495.29	2924
682	271.8	1671.66	575.385	890.962	1557.5	2494.33	2921.67
681	271.9	1671.8	575.385	891.633	1557.75	2494	2921.43
680	272	1671.97	576.154	891.731	1558.29	2493.68	2922.67
679	272.1	1671.81	576.296	892.5	1558.24	2493.48	2921.88
678	272.2	1671.75	576.667	892.182	1557.95	2492.4	2919.33
677	272.3	1671.96	577.143	892.778	1557.8	2492.27	2919.29
676	272.4	1671.77	578.077	892.593	1557.75	2491.67	2919.29
675	272.5	1671.86	578.148	892.857	1557.73	2490.5	2917.5
674	272.6	1671.51	578.667	892.982	1558.44	2490	2915
673	272.7	1671.4	578.667	893.393	1557.91	2489.72	2914.71
672	272.8	1671.29	579.355	893.585	1558.04	2488.78	2914.12
671	272.9	1671.41	580.909	893.448	1558.04	2489.17	2911
670	273	1671.48	581.364	893.818	1558.57	2489.38	2908.57
669	273.1	1671.16	581.364	893.929	1558.18	2488.53	2908.33
668	273.2	1671.03	582.105	894.561	1557.56	2488.28	2906.67
667	273.3	1671	583.182	894.655	1557.73	2487.43	2906.67
666	273.4	1670.78	583.81	894.906	1558.1	2486.86	2905.71
665	273.5	1670.45	583.81	894.737	1557.5	2485.83	2904.67
664	273.6	1670.23	584	895	1558.3	2484.87	2903.57
663	273.7	1670.07	584.5	895.254	1557.76	2484.65	2901.43
662	273.8	1670.03	584.762	895.5	1557.84	2484.5	2902.35
661	273.9	1669.88	585	895.862	1557	2484.42	2900
660	274	1669.59	585.2	895.789	1557.4	2483.41	2898.75
659	274.1	1669.64	585	896.102	1557.2	2483.33	2899.38
658	274.2	1669.25	584.783	896.379	1557.12	2482	2897.65
657	274.3	1669.11	585.417	897.037	1557.12	2481.14	2895.63
656	274.4	1668.94	585	896.964	1556.94	2481.43	2895.56
655	274.5	1668.92	586	897.17	1556.55	2480.91	2895.29
654	274.6	1668.64	585.652	897.5	1556.46	2480.61	2894.44
653	274.7	1668.68	585.652	897.451	1556.33	2480.62	2892.35
652	274.8	1668.49	586	897.308	1556.33	2479.66	2891.87
651	274.9	1668.41	585.652	897.4	1556.52	2480	2891.33
650	275	1668.32	586	897.17	1556.04	2480	2888.67
649	275.1	1668.15	584.762	897.091	1555.56	2479.39	2887.65
648	275.2	1668.2	584.762	896.5	1556.19	2480	2887.78
647	275.3	1668.31	584.762	896.441	1556.25	2479.74	2887
646	275.4	1668.21	583.5	896.14	1555.48	2480.34	2887.89
645	275.5	1668.31	583.636	896.14	1555.12	2481.72	2886.88
644	275.6	1668.46	583.333	896.094	1555.24	2482.9	2887.5
643	275.7	1668.49	583.043	895.593	1554.78	2483.71	2888.82
642	275.8	1668.64	582.273	895.333	1554.39	2484.71	2889.47
641	275.9	1668.79	581.818	894.561	1554.42	2485.68	2888.7
640	276	1668.72	580	894.035	1554.5	2485.68	2888.08
639	276.1	1669.02	580	893.729	1554.36	2487.25	2888.97
638	276.2	1669.74	579.31	892.969	1554.47	2489.73	2892.27
637	276.3	1669.79	579.286	891.765	1554.44	2492.11	2893.2
636	276.4	1670.17	577.931	890.625	1554.74	2493	2895
635	276.5	1670.48	577.931	889.787	1554.29	2493.57	2896.96
634	276.6	1671.02	577	887.826	1554.57	2496.5	2901
633	276.7	1671.31	575.806	886.739	1555.13	2498.89	2902.78
632	276.8	1671.88	574	886.17	1555.12	2501.43	2907.06
631	276.9	1672.51	572.083	884.167	1555.61	2503.42	2911
630	277	1672.84	571.667	882.2	1555.75	2505.14	2912.63
629	277.1	1673.54	571.379	880.98	1556.58	2508.12	2916.19
628	277.2	1674.14	570.357	878.889	1556.97	2510.88	2918.89
627	277.3	1674.99	568.571	877.321	1557.22	2512.9	2923.68
626	277.4	1675.61	567.407	875.385	1558.06	2517.1	2926.11
625	277.5	1676.36	566.154	872.5	1558.67	2520	2931.9
624	277.6	1677.07	564	871.277	1559.17	2523.03	2935
623	277.7	1677.92	563.6	869.574	1558.72	2526.07	2939.41
622	277.8	1678.79	562.5	868.81	1559.53	2530.27	2943.5
621	277.9	1679.61	560.741	866.522	1560.56	2532.33	2948.42
620	278	1680.77	560	864.49	1560.65	2535.48	2952.22
619	278.1	1681.77	557.826	862.25	1561.76	2538.89	2957.14
618	278.2	1682.51	555.769	860.435	1563.08	2541.18	2959.57
617	278.3	1683.64	553.333	859.13	1565	2545	2965.45
616	278.4	1684.81	552	856.852	1565.42	2549.14	2971.11
615	278.5	1685.86	550	854.63	1566.59	2553.16	2976.84
614	278.6	1687.12	548.148	853.333	1567.8	2558.06	2981.43
613	278.7	1688.2	546.071	850.227	1568.06	2560.59	2987.62
612	278.8	1689.3	543.478	848.571	1568.6	2566.67	2992.86
611	278.9	1690.67	541	846.829	1569.09	2570.77	2998.42
610	279	1691.78	540	844.146	1570.56	2575.31	3004.29
609	279.1	1693.09	536.786	842.6	1572.7	2579.2	3008.57
608	279.2	1694.4	534.348	841.429	1574	2584.17	3016.52
607	279.3	1695.77	531.304	839.4	1575.25	2590	3023.18
606	279.4	1697.07	529.13	837.292	1574.57	2593.33	3028.64
605	279.5	1698.37	526.071	835.918	1575.26	2597.57	3036.19
604	279.6	1699.79	524.583	834.783	1576.39	2602.81	3041.76
603	279.7	1701.4	521.429	832.826	1576.41	2607.81	3049.52
602	279.8	1702.69	520	831.042	1576.88	2612.43	3055.63
601	279.9	1704.04	518.095	829.259	1576.18	2616.13	3062.86
600	280	1705.45	515.417	827.778	1576.67	2621.47	3069.47
599	280.1	1706.82	513.333	824.754	1577.6	2625.94	3075.26
598	280.2	1708.19	510.952	822.424	1577.4	2631.25	3081.18
597	280.3	1709.76	508.889	819.688	1578.46	2636.13	3087.83
596	280.4	1711.21	507.5	817.692	1579	2640	3093.89
595	280.5	1712.58	505.556	815	1580.43	2645.45	3100.67
594	280.6	1713.89	503.929	812.373	1580.89	2648.33	3106.32
593	280.7	1715.42	501.2	811.034	1581.19	2654.69	3113.33
592	280.8	1716.87	499.31	808.571	1581.22	2658.92	3118.7
591	280.9	1718.19	497.586	806.415	1581.63	2664.81	3125.91
590	281	1719.67	496.071	805	1582.33	2668.61	3133.12
589	281.1	1721.08	493.846	803.051	1583.54	2674.8	3138.1
588	281.2	1722.54	491.935	801.356	1583.83	2680	3146.87
587	281.3	1723.88	490.323	800.645	1585.28	2685.6	3151.87
586	281.4	1725.34	487.037	798.475	1585.54	2690.91	3160.53
585	281.5	1726.68	485	796.667	1585.8	2696.52	3165
584	281.6	1728.08	481.5	795.556	1588.12	2701.85	3171.11
583	281.7	1729.44	478.611	794.464	1589.49	2707.5	3178.13
582	281.8	1730.73	476.857	793.019	1590.91	2710.91	3184.71
581	281.9	1732.05	474.688	791	1590.83	2716.52	3189
580	282	1733.13	472.857	790	1591.67	2720.43	3195
579	282.1	1734.72	469.25	788.511	1593.33	2725.71	3200.71
578	282.2	1735.82	467.632	787.143	1594.13	2729.57	3207.06
577	282.3	1737.05	465.676	785.536	1593.9	2734.12	3210.67
576	282.4	1738.33	463.214	784	1594.25	2740	3218.12
575	282.5	1739.65	460.303	782.881	1595	2742.63	3222.86
574	282.6	1740.76	459.167	780.926	1596.11	2746.67	3227.5
573	282.7	1741.96	456.111	779.592	1597.22	2750.43	3234.38
572	282.8	1743.04	452.963	778.78	1597.65	2753.68	3237.86
571	282.9	1744	450.455	777.143	1598.79	2757.65	3243.53
570	283	1745.26	448.723	776.364	1600	2761	3248.57
569	283.1	1746.36	448.25	775.6	1600.57	2763.33	3253.89
568	283.2	1747.4	445.938	773.958	1601.18	2767.83	3256.88
567	283.3	1748.32	444.194	772	1601.38	2770	3262.78
566	283.4	1749.42	442.5	770.833	1602.58	2772.92	3266.67
565	283.5	1750.32	441.111	769.783	1603.61	2776.15	3272
564	283.6	1751.35	440	769.302	1603.24	2780	3275.63
563	283.7	1752.36	438.71	767.174	1603.33	2783.67	3280.95
562	283.8	1753.26	437.241	766	1603.94	2785.93	3283.33
561	283.9	1754.12	435.417	764.545	1604.38	2788.85	3287.27
560	284	1754.9	433.333	762.821	1605	2791.07	3291.36
559	284.1	1755.88	431.667	761.395	1606.25	2794.17	3293.64
558	284.2	1756.74	430.345	760.816	1606.29	2796.92	3299.09
557	284.3	1757.55	428.947	760	1607.03	2799.2	3301.88
556	284.4	1758.24	428.333	758.8	1607.69	2801.54	3305
555	284.5	1759.02	427.273	757.407	1608.25	2804.29	3306.92
554	284.6	1759.89	426.061	756.667	1608.57	2806.54	3311.67
553	284.7	1760.47	423.667	755.085	1609.09	2808.46	3313.57
552	284.8	1761.13	422.432	754.074	1609.76	2811.25	3317.33
551	284.9	1761.8	421.622	753.208	1609.76	2813.2	3318.57
550	285	1762.42	420.286	751.887	1610.31	2815.2	3320
549	285.1	1763.1	419.487	751.538	1611.47	2816.96	3325
548	285.2	1763.68	418.919	750.196	1612	2820.74	3327.14
547	285.3	1764.29	418.286	750	1612.63	2822.22	3327.69
546	285.4	1764.74	416.429	749.091	1612.89	2823.1	3331
545	285.5	1765.38	415.714	748	1613.51	2825	3333.85
544	285.6	1765.86	415.116	747.5	1613.89	2827.1	3335.71
543	285.7	1766.23	414.419	746.667	1614.05	2828.52	3338.46
542	285.8	1766.64	414.186	745.682	1614.74	2830	3340.83
541	285.9	1767.16	413.415	744.884	1614.86	2831.94	3341.67
540	286	1767.54	411.351	744.048	1615.28	2833.67	3343.33
539	286.1	1767.95	409.565	743.721	1615.26	2835.33	3346
538	286.2	1768.34	408.958	743.111	1615.83	2836	3347
537	286.3	1768.69	408.2	742.727	1615.83	2836.97	3348
536	286.4	1768.97	407.872	741.556	1616.32	2838.18	3349
535	286.5	1769.34	407.5	741.087	1616.76	2839.33	3350.83
534	286.6	1769.48	406.522	740.588	1617.3	2840	3350
533	286.7	1769.78	406.25	740.577	1618.29	2841.54	3351.82
532	286.8	1769.99	405.714	740.392	1618.33	2842.4	3351.82
531	286.9	1770.23	405.106	739.744	1618.33	2842.73	3353.08
530	287	1770.39	404.667	739.487	1618.38	2844	3353.64
529	287.1	1770.59	404.651	738.75	1618.38	2845.38	3354.17
528	287.2	1770.76	404.419	738.5	1618.38	2845.6	3355.83
527	287.3	1770.79	404.186	738.205	1619.7	2846.15	3355.83
526	287.4	1770.96	404.222	738.056	1619.7	2847.39	3356.43
525	287.5	1770.94	403.953	737.941	1619.41	2847.31	3357.33
524	287.6	1770.96	403.659	737.647	1619.35	2847.2	3356
523	287.7	1770.89	404.13	737.273	1619.33	2846.92	3356
522	287.8	1770.99	403.81	737.059	1619.33	2847.6	3356.67
521	287.9	1770.89	403.333	736.97	1619.33	2846.67	3356.43
520	288	1770.77	403.571	736.97	1619.03	2846.21	3355
519	288.1	1770.67	403.333	736.875	1618.75	2845.86	3355.29
518	288.2	1770.58	403.571	736.875	1619.29	2845.48	3354.67
517	288.3	1770.38	403.415	736.97	1618.97	2845.36	3354.29
516	288.4	1770.17	403.721	737.143	1618.93	2844.69	3353.33
515	288.5	1769.97	403.953	737.143	1618.93	2843.71	3352
514	288.6	1769.72	403.953	737.429	1618.93	2843.12	3351
513	288.7	1769.47	404.186	737.429	1618.28	2841.79	3350
512	288.8	1769.08	404.524	737.778	1618.21	2840.97	3349.44
511	288.9	1768.73	405.238	738.056	1618.08	2839.69	3347.37
510	289	1768.39	405.682	738.824	1618.08	2838.11	3346.25
509	289.1	1767.86	406.098	739.412	1617.92	2836.84	3344.38
508	289.2	1767.4	407.027	740	1617.08	2836.11	3342.86
507	289.3	1767	407.5	740	1616.4	2834.24	3341.43
506	289.4	1766.35	408.372	740.189	1615.6	2831.61	3338.13
505	289.5	1765.87	408.889	740.6	1615	2829.14	3336.25
504	289.6	1765.22	409.535	741.224	1614.83	2827.63	3334
503	289.7	1764.6	411.143	742.075	1614.07	2826.49	3330.83
502	289.8	1763.91	412.308	742.745	1613.45	2823.55	3327.86
501	289.9	1763.18	414.103	743.333	1612.59	2820	3324.62
500	290	1762.45	415.122	745.094	1612.41	2819	3322
499	290.1	1761.48	416.047	745.769	1611.94	2815.2	3316.67
498	290.2	1760.6	417.25	746.604	1611.03	2812.5	3312.86
497	290.3	1759.7	418.158	748.444	1610	2809.35	3310.67
496	290.4	1758.86	420.556	750.313	1609.09	2807	3307
495	290.5	1757.92	421.282	751.207	1608.79	2803	3301.43
494	290.6	1756.68	423.158	752.5	1608	2799	3297.78
493	290.7	1755.65	425	753.548	1608.12	2795.91	3292.31
492	290.8	1754.48	427.059	754.828	1607.59	2792.69	3287.27
491	290.9	1753.19	428.75	756.441	1606.13	2787.93	3281
490	291	1751.91	430.541	757.5	1605	2783.79	3277.27
489	291.1	1750.53	432.973	759.412	1603.94	2779.68	3269.23
488	291.2	1749.18	435	761.2	1603.25	2774.35	3265
487	291.3	1747.73	437.297	764.038	1602.44	2770	3257.69
486	291.4	1746.32	440	765.918	1601.78	2765.6	3252.31
485	291.5	1744.72	442.188	767.5	1601.33	2760.37	3244.17
484	291.6	1742.98	445	770.189	1599.74	2754.76	3236.47
483	291.7	1741.33	446.667	772.727	1598.29	2750.69	3228.75
482	291.8	1739.51	448.056	774.8	1597.62	2744.35	3222.78
481	291.9	1737.69	452.5	777.5	1596.43	2740	3215.56
480	292	1735.8	454.839	779.259	1595.24	2732.69	3206
479	292.1	1733.9	458	782.245	1594.32	2726.3	3196.88
478	292.2	1731.86	461.25	785.333	1593.51	2720.61	3189.29
477	292.3	1729.75	463.5	787.736	1591.67	2713.79	3180.53
476	292.4	1727.52	466.25	790	1590.51	2707.39	3170
475	292.5	1725.28	468.571	792.807	1589.29	2700	3158.46
474	292.6	1722.98	473.333	796.667	1588.05	2691.07	3151.18
473	292.7	1720.59	476.364	799.057	1586.9	2684.78	3141.2
472	292.8	1718.1	479.5	801.489	1585.25	2675	3130.48
471	292.9	1715.76	481.765	804.565	1584.32	2667.83	3119.17
470	293	1713	486.087	808.2	1584.52	2658.18	3105.5
469	293.1	1710.46	490.312	812.115	1583.1	2650.27	3095
468	293.2	1707.59	491.538	815	1581.82	2641.47	3083.68
467	293.3	1704.95	495.263	818.704	1581.11	2632.41	3070.71
466	293.4	1701.95	499.048	823.333	1580.22	2623.57	3058.5
465	293.5	1699.21	502	827.705	1579.4	2615.94	3045
464	293.6	1696.08	505.862	832.833	1578	2606.29	3030.62
463	293.7	1693.1	508.148	835.882	1577.44	2598.08	3020.53
462	293.8	1689.98	512	839.796	1574.81	2588.8	3009.58
461	293.9	1687.01	515.217	844.545	1574	2579.33	2997.5
460	294	1683.72	518.462	847.209	1572.5	2569	2983.75
459	294.1	1680.46	522.581	852.128	1570.5	2559.09	2969.14
458	294.2	1677.32	525.172	856.341	1570.67	2550.61	2956.06
457	294.3	1674.08	529.048	859.762	1569.15	2540.69	2941.92
456	294.4	1670.68	532.187	862.5	1568.5	2531.08	2928.95
455	294.5	1667.32	535.6	866.341	1566.3	2521.18	2914.74
454	294.6	1664.06	538.696	870.98	1564.13	2509.74	2901.05
453	294.7	1660.48	542.143	874.528	1562.7	2500.83	2886.25
452	294.8	1657.12	544.615	877.347	1561.36	2490.77	2874.5
451	294.9	1653.75	548.214	881.628	1559.74	2479.23	2860.43
450	295	1650.17	551.111	885.106	1556.67	2468	2846.32
449	295.1	1647.09	555.714	889.02	1556.73	2459.19	2832.8
448	295.2	1643.62	558.889	893.542	1555.29	2448.72	2819
447	295.3	1640.11	561.765	897	1554.46	2437.57	2805.77
446	295.4	1636.99	564.667	898.868	1553.65	2427.78	2794.83
445	295.5	1633.85	568	902.105	1553.38	2417.42	2781.11
444	295.6	1630.28	570.625	906.136	1552.42	2404.38	2768.33
443	295.7	1627.11	573.214	908.302	1552.04	2393.82	2756
442	295.8	1624.14	575.938	911	1551.57	2384.57	2745
441	295.9	1621.12	578.788	914.186	1550.68	2375.65	2733.33
440	296	1618.07	581.379	916.889	1550.23	2366.22	2723.33
439	296.1	1615.19	584.375	918	1550.42	2359.32	2711.85
438	296.2	1612.76	586.25	919.825	1550	2353.04	2701.79
437	296.3	1609.74	590	922.791	1548.3	2345	2691
436	296.4	1607.42	592.195	925.532	1550	2337.22	2681.11
435	296.5	1604.69	593.636	928.205	1551.02	2328.57	2671.29
434	296.6	1602.3	594.688	929.744	1549.04	2322.43	2664.44
433	296.7	1600.02	596.667	931.667	1549.17	2316.41	2656.47
432	296.8	1598.01	597.812	933.077	1549	2310	2648.67
431	296.9	1596.23	599.394	935.25	1548.09	2303.89	2641.2
430	297	1594.35	600.37	936.579	1549.03	2298.86	2635.83
429	297.1	1592.34	601.852	936.75	1549.06	2292.43	2625.45
428	297.2	1590.71	602.759	937.442	1547.27	2288.41	2618.97
427	297.3	1589.65	604.242	938	1547.63	2284.72	2615.26
426	297.4	1588.11	605.938	939.318	1546.98	2280.71	2608.1
425	297.5	1587.17	606.061	940.833	1546.36	2277	2603.75
424	297.6	1586.16	606.97	941.915	1546.25	2273.13	2600.32
423	297.7	1585.37	607.5	942.708	1545.71	2271.79	2596.36
422	297.8	1584.79	607.879	942.653	1545	2269.14	2591.85
421	297.9	1584.28	607.714	942.826	1545.92	2266.92	2588.4
420	298	1583.94	608.333	943.261	1545.69	2266.05	2585.86
419	298.1	1583.63	608.71	943.191	1545.92	2266.76	2584.29
418	298.2	1583.73	609.394	943.333	1546.04	2267.14	2583.79
417	298.3	1583.35	609.032	943.095	1546.2	2265.38	2582.65
416	298.4	1583.7	609.333	942.857	1546.67	2266.47	2583.1
415	298.5	1584.03	608.235	942.75	1547.41	2267.71	2583.82
414	298.6	1584.43	607.941	942.25	1546.98	2269.14	2584.69
413	298.7	1584.83	607.429	942.051	1548.37	2270.24	2585.67
412	298.8	1585.72	606.857	941.667	1549.15	2273.1	2588.52
411	298.9	1586.28	607.059	942.143	1549.33	2276	2591.48
410	299	1587.34	605.862	941.429	1550.44	2280.19	2595.29
409	299.1	1588.16	604.839	940.769	1551.16	2281.7	2597.94
408	299.2	1588.9	604.828	940	1551.91	2284.67	2600
407	299.3	1590.45	602.759	939.143	1553.65	2288.37	2607.44
406	299.4	1591.42	602.727	938.824	1554.36	2290.73	2612.14
405	299.5	1592.57	601.538	937.187	1554.81	2296.29	2616.94
404	299.6	1593.82	600.732	937.097	1556.38	2300.21	2621.43
403	299.7	1595.26	599.677	935.556	1555.69	2304.63	2628.85
402	299.8	1596.52	599.286	934.5	1556.25	2310.19	2633.33
401	299.9	1598.04	598.333	933.421	1558.16	2313.49	2638.39
400	300	1599.45	596.364	932	1557.22	2319.09	2645.48
399	300.1	1601	595.263	930.833	1559.11	2323.04	2651.71
398	300.2	1602.65	593.784	929.524	1560.85	2328.33	2658.1
397	300.3	1603.94	592.439	928.571	1562.07	2332.55	2660.95
396	300.4	1605.65	591.429	926.744	1562.75	2338.28	2668.46
395	300.5	1606.83	589.118	925.319	1564	2341.6	2673.85
394	300.6	1608.7	587.073	924.167	1565.74	2346.05	2680.53
393	300.7	1610.02	585.789	923.061	1566.73	2350.75	2686.09
392	300.8	1611.53	583.684	921.628	1567.76	2354.19	2693
391	300.9	1613.14	582.927	921.064	1569.11	2359.17	2700.38
390	301	1614.57	581.282	920.426	1568.94	2365.68	2707.83
389	301.1	1616.29	580.256	920	1568.85	2370	2714.76
388	301.2	1617.62	577.778	918	1571.04	2374.5	2721.3
387	301.3	1618.96	576.667	916	1571.93	2377.5	2728.42
386	301.4	1620.47	575	914.444	1572.81	2382.44	2733.67
385	301.5	1621.62	573.902	913.409	1573.22	2386.67	2738.89
384	301.6	1623.11	572.821	912.083	1573.15	2391.25	2745.29
383	301.7	1624.5	571.75	911.304	1573.85	2396.18	2751.54
382	301.8	1625.85	571.053	910.222	1574.68	2400.47	2757.78
381	301.9	1626.94	569.677	909.762	1574.9	2402.97	2763.85
380	302	1628.14	567.5	909.167	1575.74	2407.59	2767.83
379	302.1	1629.28	567.059	907.805	1574.77	2410.56	2772.8
378	302.2	1630.38	565.714	907.25	1574.8	2413.33	2776
377	302.3	1631.37	564.138	905.714	1574.4	2417.27	2781
376	302.4	1632.54	563.929	905	1574.23	2419.69	2784
375	302.5	1633.34	562.5	903.191	1574.2	2422.86	2788.82
374	302.6	1634.17	562.059	902.609	1574.38	2426.39	2791.25
373	302.7	1634.96	561.471	900	1574.17	2429.74	2795.95
372	302.8	1635.8	560.882	899.565	1574.51	2431.11	2798.28
371	302.9	1636.54	560.556	898.077	1575.19	2434.32	2801
370	303	1637.44	560	897.222	1575	2436.57	2806.09
369	303.1	1637.87	557.5	896.122	1575.34	2438.89	2807.04
368	303.2	1638.53	557.5	895	1575.44	2441.32	2809.26
367	303.3	1639	557.097	893.922	1575.58	2442.35	2812.63
366	303.4	1639.26	556.667	893.333	1575.96	2444.19	2813.78
365	303.5	1639.95	556.25	893.404	1576.61	2446	2815
364	303.6	1640.45	555.806	892.292	1576.36	2447.3	2818.08
363	303.7	1640.59	555.806	891.607	1576.61	2447.88	2818.62
362	303.8	1640.89	555.484	890.877	1576.47	2448.64	2820.59
361	303.9	1641.06	555.517	890.172	1576.33	2450.25	2821.47
360	304	1641.14	554.815	889.444	1576.53	2451	2822.76
359	304.1	1641.31	555.357	888.611	1575.83	2452.05	2822.81
358	304.2	1641.36	555.172	887.568	1576.04	2451.89	2823.2
357	304.3	1641.43	554.688	887.941	1575.95	2451.79	2823.33
356	304.4	1641.19	554.138	886.25	1575.78	2450.53	2822.69
355	304.5	1641.17	554.194	886.316	1575.58	2451.35	2822.81
354	304.6	1641.18	554.375	885.952	1575.33	2451.67	2822.41
353	304.7	1640.91	555.312	885.854	1575.37	2451.33	2821.88
352	304.8	1640.53	555.455	886	1574.87	2450.68	2820.69
351	304.9	1640.61	555.714	885.641	1575	2450.53	2821.33
350	305	1639.97	555.588	885.714	1575.13	2448.5	2818.33
349	305.1	1639.76	555.882	885.476	1574.39	2448.11	2819.06
348	305.2	1639.6	556.176	886.591	1574.78	2447.25	2817.93
347	305.3	1638.75	556.667	886.818	1573.26	2446.18	2814.84
346	305.4	1638.34	557.273	886.818	1573.78	2442.76	2812.61
345	305.5	1637.92	558.182	887.619	1573.41	2442.33	2810
344	305.6	1637.2	558	887.674	1573.11	2439.8	2808.67
343	305.7	1636.64	559.091	888.444	1572.89	2438.67	2806.54
342	305.8	1635.86	559.688	888.696	1572.5	2438	2804.44
341	305.9	1634.88	560.27	889.535	1572.27	2435.94	2800
340	306	1634.29	560.294	890.469	1571.73	2435.71	2799.26
339	306.1	1633.56	560.303	891.129	1571.15	2434.05	2795.52
338	306.2	1632.59	560.882	891.613	1570.38	2431.43	2793.46
337	306.3	1631.92	562	892.281	1570.16	2431.58	2790.37
336	306.4	1630.8	562.368	893.036	1570	2427.42	2788.89
335	306.5	1630.12	564.25	893.75	1568.93	2425.41	2784.64
334	306.6	1629.17	564.615	894.717	1567.92	2423.43	2781.33
333	306.7	1627.98	565.135	895	1566.91	2419.44	2778.8
332	306.8	1626.95	565.429	895.091	1566.21	2417.44	2773.33
331	306.9	1625.72	566	896.122	1565.38	2414.71	2770
330	307	1625.15	567.419	896.667	1564.23	2412.42	2767.92
329	307.1	1623.52	568.182	896.897	1563.62	2409.12	2763.12
328	307.2	1622.54	568.286	897.586	1563.56	2405.56	2759.26
327	307.3	1621.46	568.333	898.305	1562.2	2402.94	2755
326	307.4	1620.11	568.857	899.298	1562.06	2400	2749.14
325	307.5	1619.18	569.459	901.154	1560.7	2396.56	2748.08
324	307.6	1617.73	569.744	902.041	1561.31	2391.54	2741.67
323	307.7	1616.76	571.724	902.8	1560.83	2388.61	2737.58
322	307.8	1615.11	572.308	903.6	1559.2	2384.67	2732.35
321	307.9	1614.11	573.214	904.151	1559.77	2382.22	2728.44
320	308	1612.65	573.871	905.185	1557.91	2378.24	2724.29
319	308.1	1611.25	574.667	905.577	1555.96	2373.94	2718.33
318	308.2	1610.11	575.312	906.531	1554.8	2370.69	2714.24
317	308.3	1608.98	576.216	907.391	1553.33	2366.76	2709.63
316	308.4	1607.48	576.857	907.447	1552.45	2364.14	2705.81
315	308.5	1605.98	578.333	908.444	1551.5	2360	2700.32
314	308.6	1605.07	578.667	908.889	1550	2358.18	2696.25
313	308.7	1603.38	578.966	910.208	1548.22	2353.9	2691.62
312	308.8	1602.18	580	911.2	1546.96	2351.35	2687.59
311	308.9	1600.63	580.8	911.277	1545.33	2346.83	2682.07
310	309	1599.44	581.481	912.4	1545.11	2342.97	2677.2
309	309.1	1598.38	581.6	913.095	1543.18	2340	2674.33
308	309.2	1596.56	582.8	913.415	1542	2335.45	2668.62
307	309.3	1595.51	583.2	913.5	1540.64	2331.72	2664.33
306	309.4	1594.28	583.2	914.39	1539	2327.5	2661.47
305	309.5	1592.61	583.6	915.238	1537.29	2323.45	2655
304	309.6	1591.2	584.074	915.5	1536.55	2320.3	2648.24
303	309.7	1590.36	586.154	917.027	1536	2316.94	2645.36
302	309.8	1588.91	585.385	918.182	1534.9	2313.79	2641.85
301	309.9	1588.09	586.429	918.611	1533.78	2311.56	2637.88
300	310	1586.64	586.667	918.611	1533.4	2309.13	2632
299	310.1	1585.57	587.241	919.722	1532.39	2305.33	2628.46
298	310.2	1584.51	587.742	920.244	1531.59	2302.11	2625.28
297	310.3	1583.48	587.879	921	1530	2300	2620.32
296	310.4	1582.38	587.812	921.579	1528.24	2297.2	2618.48
295	310.5	1581.24	588.966	921.316	1528.08	2293.33	2614
294	310.6	1580.36	589.394	921.944	1526.94	2291.56	2610
293	310.7	1579.32	588.857	922.195	1526.41	2288.65	2607.92
292	310.8	1578.57	588.889	923.023	1525.81	2286.18	2605
291	310.9	1577.32	589.73	923.488	1524.2	2283.1	2601.85
290	311	1576.9	589.189	923.659	1524	2282.14	2600
289	311.1	1576.02	590.323	924.286	1523.86	2280.64	2596.52
288	311.2	1575.22	591.034	924.5	1522.79	2276.86	2592.4
287	311.3	1574.55	591.212	924.75	1523.59	2274.74	2591.74
286	311.4	1573.74	590.968	925.588	1521.75	2273.24	2589.2
285	311.5	1573.07	591.765	926.176	1520.77	2270	2588
284	311.6	1572.72	591.765	926.875	1521.28	2270.26	2585.71
283	311.7	1572.31	591.25	926.97	1521.36	2268.72	2583.79
282	311.8	1571.65	591.562	927.143	1521.28	2266.47	2581.88
281	311.9	1571.21	591.714	928.065	1520.6	2265.26	2581.29
280	312	1570.91	591.944	927.667	1520.74	2264.29	2581.76
279	312.1	1570.58	591.667	927.419	1521.38	2263.55	2578.89
278	312.2	1570.59	591.714	928	1521.13	2263.12	2581.05
277	312.3	1570.6	592.105	927.742	1521	2261.61	2577.83
276	312.4	1570.52	590.882	927.222	1520.43	2261.67	2581.84
275	312.5	1570.27	590.909	926.842	1520.67	2261.62	2580.61
274	312.6	1570.14	590.312	926.944	1520.67	2261.46	2580.36
273	312.7	1570.13	590.882	927.436	1520.43	2259.07	2577.78
272	312.8	1570.09	590	926.842	1520.6	2259.05	2579.31
271	312.9	1570.11	590.588	927.273	1521.15	2257.67	2578.39
270	313	1570.37	590	927.292	1521.25	2258.05	2578.44
269	313.1	1570.58	589.286	927.292	1520.73	2258.38	2578.5
268	313.2	1570.91	589.286	927.556	1521.67	2258	2580.36
267	313.3	1571.38	589.286	927.727	1521.8	2258.53	2581.85
266	313.4	1571.63	588.667	928	1522.08	2259.14	2582.86
265	313.5	1572.03	588.387	928.205	1523.53	2259.12	2584.52
264	313.6	1572.59	588.387	928.5	1523.2	2259.72	2585.76
263	313.7	1573.19	587.5	927.895	1524.55	2258.67	2588.06
262	313.8	1573.72	587.857	928.611	1525	2259.57	2589.41
261	313.9	1574.14	587.931	928.158	1525	2262.63	2593.03
260	314	1574.62	586.129	928.235	1525.36	2262.37	2597
259	314.1	1575.69	586.774	928.286	1526.73	2264.42	2598.44
258	314.2	1576.3	585.312	928.056	1527.76	2265.65	2601
257	314.3	1577.37	584.545	927.632	1527.92	2268.92	2605.14
256	314.4	1577.9	584.545	927.368	1528.11	2270.44	2607.67
255	314.5	1578.77	584.286	927.317	1528.28	2271.43	2610
254	314.6	1579.86	584.571	927.381	1528.6	2272.97	2616
253	314.7	1580.41	583.143	926.829	1528.89	2274.26	2619.12
252	314.8	1581.18	582.973	926.923	1529.62	2274.89	2622.73
251	314.9	1582.31	583.143	926.857	1531.4	2276.67	2627.27
250	315	1583.14	581.875	926.667	1531.96	2279.41	2631.39
249	315.1	1584.21	582.353	926.944	1533.16	2279.27	2635.71
248	315.2	1585.15	581.667	927	1533.77	2281.25	2639.63
247	315.3	1586.43	581.515	926.444	1534.4	2284.21	2642.81
246	315.4	1587.46	580.938	926.19	1534.81	2286.88	2648.08
245	315.5	1588.39	580.909	925.581	1535.82	2289.68	2652.5
244	315.6	1589.33	579.697	925	1535.81	2290.63	2656.15
243	315.7	1590.64	578.824	924.75	1536.31	2293.44	2661.79
242	315.8	1591.82	579.062	925	1536.73	2295.88	2666.47
241	315.9	1592.89	578.485	924.186	1537.45	2298.79	2671.07
240	316	1593.92	578.125	923.571	1539.15	2301.84	2673.81
239	316.1	1594.82	578.065	922.895	1538.7	2303.85	2677.5
238	316.2	1596.1	578.214	922.973	1539.58	2306.29	2682.69
237	316.3	1596.95	577.778	922.353	1540.19	2310.53	2685.24
236	316.4	1597.94	577.857	922.368	1541.13	2313.59	2689
235	316.5	1599.1	578.214	922.703	1541.48	2316.21	2692.22
234	316.6	1600.3	578.929	922.564	1541.64	2320.57	2696.4
233	316.7	1600.89	577.143	922.25	1542.24	2320.88	2700.83
232	316.8	1602.06	577	921.75	1542.31	2324.32	2705
231	316.9	1602.9	577.333	921.795	1543.56	2326.77	2707.5
230	317	1603.98	577.5	922.143	1543.75	2329.33	2711.67
229	317.1	1604.84	577.143	921.957	1544.17	2331.82	2715
228	317.2	1605.97	577.059	921.818	1544.26	2335	2716.67
227	317.3	1606.72	577.222	921.395	1544.41	2337.5	2718.75
226	317.4	1607.51	576.857	920.541	1544.58	2341.25	2720.71
225	317.5	1608.28	576.667	920.27	1545.28	2342.81	2723.85
224	317.6	1608.94	576.571	920	1546.17	2345.56	2726.52
223	317.7	1609.95	576.571	919.688	1546.46	2348.06	2727.92
222	317.8	1610.53	576.176	919.697	1546.3	2350.37	2731.76
221	317.9	1611.2	576.061	919.118	1546.96	2351.07	2734.17
220	318	1611.83	576	918.205	1547.74	2352.81	2735.6
219	318.1	1612.35	576.176	917.619	1547.96	2353.2	2738.08
218	318.2	1612.96	576	917.561	1549.2	2355.93	2739.57
217	318.3	1613.38	575.714	916.585	1549.18	2356.55	2741.6
216	318.4	1614.04	575.588	915.676	1550.22	2360	2743.08
215	318.5	1614.49	576.389	915.833	1550	2360	2743.89
214	318.6	1614.65	575.897	915	1549.32	2363.93	2745.56
213	318.7	1615.15	576.053	914.194	1549.78	2366.55	2747.5
212	318.8	1615.24	575.676	913.333	1550.29	2369.2	2747.5
211	318.9	1615.66	575.5	913.714	1550.51	2371.32	2749.47
210	319	1615.61	575.5	912.857	1551.08	2371.67	2750.45
209	319.1	1615.86	575.5	912.857	1550.95	2371.79	2751.36
208	319.2	1615.89	575.263	912.571	1549.77	2373	2751
207	319.3	1616.12	575	912.632	1549.78	2374.29	2750
206	319.4	1615.89	575.588	911.875	1549.4	2373.75	2751
205	319.5	1615.8	574.848	911.622	1549	2374.17	2749.6
204	319.6	1615.78	575.455	911.622	1550.43	2374	2751
203	319.7	1615.57	575.588	911.892	1549.79	2374.21	2752
202	319.8	1615.03	575.152	910.909	1549.79	2372.5	2750.56
201	319.9	1615	575.455	911.622	1550	2373.1	2749.6
200	320	1614.52	575.758	911.667	1550.22	2371.94	2749.6
199	320.1	1614.36	576.571	912.895	1550.2	2370.33	2748.26
198	320.2	1613.7	577.143	912.051	1550.55	2370.59	2748.64
197	320.3	1613.29	576.471	913.158	1550.38	2369.71	2748.08
196	320.4	1612.77	576.944	913.659	1549.78	2368.92	2747.2
195	320.5	1612.03	577.949	913.721	1549.5	2368	2746.33
194	320.6	1611.24	578.684	913.077	1549.25	2366.11	2745.22
193	320.7	1610.6	579.211	914.13	1548.08	2364.1	2743.6
192	320.8	1609.71	579.73	914.038	1547.31	2362.37	2740
191	320.9	1609.16	580.27	913.265	1549.3	2359.74	2738.95
190	321	1608.31	581.86	914.423	1547.25	2358.82	2735.22
189	321.1	1607.16	582.564	914.107	1546.38	2354.47	2732.07
188	321.2	1605.93	583.25	914.364	1545.59	2352	2728.5
187	321.3	1604.93	584.103	914	1545.28	2350	2725.91
186	321.4	1603.6	584.737	914.074	1544.62	2345.71	2722.5
185	321.5	1602.49	585.349	913.958	1543.67	2343.25	2719.64
184	321.6	1601.36	586.5	914.348	1542.6	2339.57	2719.38
183	321.7	1600.27	587.317	914	1542.08	2337.5	2716.47
182	321.8	1599.04	588.974	914.167	1541.59	2334.26	2714.12
181	321.9	1597.8	590.952	914.348	1541.96	2330	2710.5
180	322	1596.06	590.732	913.958	1540.82	2326.15	2706.25
179	322.1	1594.74	591.892	913.617	1539.79	2324	2699.33
178	322.2	1593.11	593.256	914.167	1538.89	2320.24	2695.45
177	322.3	1591.56	595	913.659	1538.4	2315.53	2690
176	322.4	1589.89	596.842	914	1537.8	2313.26	2685.88
175	322.5	1588.24	598.462	914.4	1536.11	2309.47	2681.88
174	322.6	1586.71	599.286	915	1534.81	2305.48	2675
173	322.7	1584.77	600.909	914.681	1533.41	2302.16	2670.5
172	322.8	1583.37	601.875	914.49	1533.27	2296	2664.55
171	322.9	1581.3	605.172	913.846	1532.79	2291.36	2657.78
170	323	1579.79	606.333	914.615	1531.54	2285.75	2651.9
169	323.1	1577.52	608.462	914.318	1532.29	2280.94	2643.5
168	323.2	1575.81	609.583	915	1532.9	2273.75	2640.45
167	323.3	1573.77	610	915.122	1531.57	2269.14	2633.85
166	323.4	1571.64	611.481	915.946	1532.06	2263.26	2625.38
165	323.5	1569.77	612.609	916.667	1531.61	2257.91	2618.24
164	323.6	1567.77	613.478	917.105	1529.79	2253.47	2609.17
163	323.7	1565.81	614.4	917.857	1528.3	2248.75	2601.88
162	323.8	1563.74	616.538	918.529	1526.9	2243.27	2593.33
161	323.9	1561.73	617.778	919.444	1524.62	2238.44	2582.94
160	324	1559.53	620.5	919.487	1523.78	2231.86	2576.5
159	324.1	1557.57	620.5	919.333	1523.88	2225.71	2570.5
158	324.2	1555.36	621.579	918.372	1523.06	2221.25	2559.35
157	324.3	1553.4	623.684	919.268	1521.63	2215.25	2553.7
156	324.4	1551.3	624.595	920.27	1519.47	2210	2544.55
155	324.5	1549.1	625.455	920.732	1516.39	2203.06	2535.62
154	324.6	1547.1	627	921.463	1514.76	2195.87	2525.67
153	324.7	1544.7	628.696	921.591	1512.37	2190	2519.26
152	324.8	1542.58	629.565	921.667	1512	2183.42	2511.5
151	324.9	1540.7	630.741	922.051	1509.25	2178	2503.68
150	325	1538.23	631.667	921.622	1507.95	2170.48	2493.68
149	325.1	1536.31	633.043	920.882	1505.95	2164.47	2487.5
148	325.2	1534.06	632.4	921.515	1504.36	2158.46	2477.83
147	325.3	1532.16	632.609	921.515	1503.91	2151.67	2469.47
146	325.4	1530.21	632.5	922.286	1503.51	2144.26	2459.58
145	325.5	1527.72	632.727	922.424	1500.74	2136.58	2453.48
144	325.6	1526.23	634	923.243	1500.2	2128.97	2446.25
143	325.7	1523.71	635	923.143	1499.14	2118.6	2436.97
142	325.8	1522.04	635.455	922.759	1496.96	2114	2429.63
141	325.9	1519.8	636.364	923.6	1495.74	2106.05	2421.87
140	326	1518.17	637.5	924.333	1495.97	2099.13	2416.11
139	326.1	1516.14	637.778	924.324	1495	2093.5	2408.57
138	326.2	1513.98	638.462	924.286	1494.62	2086.4	2401.25
137	326.3	1512.49	638.519	925.758	1494.92	2081.37	2394.78
136	326.4	1510.68	641.481	926.25	1495.29	2076.33	2390.8
135	326.5	1509.16	641.923	926.829	1494.41	2073.04	2384.55
134	326.6	1506.7	642.414	926.562	1493.51	2067.19	2377.08
133	326.7	1505.44	643.333	927.222	1492.71	2065.4	2373.81
132	326.8	1504.07	643.478	928.056	1493.38	2063.92	2367.78
131	326.9	1502.09	643.81	928.205	1491.45	2058.57	2363.57
130	327	1500.53	645.769	929.5	1490.41	2055.25	2358.75
129	327.1	1499.16	646	930.278	1490.14	2053.02	2356
128	327.2	1497.62	647.5	930.833	1488.59	2048.47	2350
127	327.3	1496.37	648.125	931	1488.33	2045.15	2348
126	327.4	1495.18	649.487	934.146	1487.89	2040.29	2346.11
125	327.5	1493.96	648.537	935.227	1487.4	2037.38	2341.25
124	327.6	1492.72	651.212	937.75	1486.86	2032.13	2337.06
123	327.7	1491.82	652.162	938.696	1487.14	2028.1	2333.89
122	327.8	1490.63	653.514	938.542	1486.31	2025.32	2328.7
121	327.9	1489.76	654.865	940	1486.23	2022.94	2325
120	328	1488.38	655	941.915	1485.61	2018.33	2320
119	328.1	1487.79	656.579	941.86	1486.03	2016.43	2315.6
118	328.2	1487.37	657.879	944.118	1485.22	2014.56	2312.31
117	328.3	1486.14	659.714	945.918	1485.37	2010.15	2306.25
116	328.4	1485.18	661.458	947.609	1485.76	2007.54	2301.11
115	328.5	1484.98	663	950	1486.07	2005.57	2296.84
114	328.6	1484.47	663.478	950	1488.04	2003.21	2293.75
113	328.7	1483.68	664.25	950.755	1488.46	2001.11	2289.17
112	328.8	1483.27	665.946	952.182	1488.79	1996.38	2282.27
111	328.9	1483.26	668.108	954.107	1490.27	1993.73	2279.33
110	329	1482.32	668.537	955.102	1490.25	1989.68	2276
109	329.1	1482.12	670.323	956.727	1489.85	1987.78	2274.09
108	329.2	1482.27	671.765	957.925	1492.47	1986.1	2270.91
107	329.3	1482.01	674.412	959.608	1493.29	1984.44	2266.54
106	329.4	1482.11	675.429	961.837	1494.09	1983.27	2265
105	329.5	1481.41	676.341	961.556	1494.85	1982.18	2261.43
104	329.6	1481.69	677.556	964.468	1496.42	1980.86	2258.71
103	329.7	1482.28	680.667	967.442	1498.4	1979.64	2255.81
102	329.8	1482.12	682.083	969.167	1498.59	1979.04	2251.79
101	329.9	1482.6	683.478	971.282	1501.49	1975.71	2249.69
100	330	1482.5	684.419	973.415	1501.43	1975.6	2247.14
99	330.1	1482.85	686.667	975.814	1503.73	1974.07	2245
98	330.2	1483.2	688.387	977.895	1504.74	1975.66	2244.48
97	330.3	1483.81	689.655	979.459	1506.55	1974.79	2242.41
96	330.4	1483.89	690.303	980.698	1507.14	1974.44	2240
95	330.5	1484.78	690.37	981.724	1509.09	1974.69	2238.28
94	330.6	1485.43	691.2	984.211	1510.51	1973.6	2238.8
93	330.7	1485.19	691.364	984.75	1510.17	1972.98	2238.33
92	330.8	1485.94	692.917	985.789	1511.53	1973.33	2236.09
91	330.9	1486.67	693.571	986.429	1512.86	1973.9	2237.2
90	331	1487.76	694.583	987.708	1513.21	1975.82	2236.21
89	331.1	1488.45	695.357	989.091	1514.92	1975.71	2235
88	331.2	1489.24	696.25	990	1516.46	1977.73	2233.7
87	331.3	1489.8	697.826	990	1516.03	1978.51	2232.07
86	331.4	1490.71	698.947	992.619	1518.14	1978.39	2229.05
85	331.5	1491.3	698	993	1517.78	1980	2228.12
84	331.6	1492.36	697.727	994.5	1518.98	1981.6	2225.91
83	331.7	1493.41	697.5	995.957	1519.05	1982.08	2228.64
82	331.8	1494.11	697.857	997.4	1519.71	1983.79	2229
81	331.9	1494.89	698.889	998.723	1520.82	1984.81	2228.24
80	332	1496.15	699.286	1000	1522.58	1986.94	2227
79	332.1	1496.88	699.615	999.412	1523.52	1988.73	2226.15
78	332.2	1498.25	699.677	1000.58	1524	1990.44	2229.58
77	332.3	1498.93	700.417	1002.04	1525.33	1991.89	2230.77
76	332.4	1500.03	700.833	1003.09	1525.52	1995.16	2233.64
75	332.5	1501.27	700.741	1004	1526.38	1997.21	2237.39
74	332.6	1502.17	702.222	1005.09	1526.71	1998.53	2234.35
73	332.7	1502.95	703.03	1006.6	1525.75	2000.42	2234.58
72	332.8	1504.17	702.581	1007.22	1527.65	2001.76	2236.36
71	332.9	1505.1	703.103	1009.13	1527.27	2002.77	2236.19
70	333	1506.43	702.857	1010.98	1527.46	2004.62	2240.59
69	333.1	1507.12	703.077	1012.22	1527.43	2005.69	2243.68
68	333.2	1508.38	702.857	1012.81	1527.34	2007.54	2245.26
67	333.3	1509.05	702.857	1013.51	1528.31	2007.12	2248.24
66	333.4	1510.29	702.857	1014.11	1528.93	2009.07	2251.58
65	333.5	1511.15	703.81	1015.2	1529.4	2009.84	2255
64	333.6	1512.43	704.348	1015.93	1530.93	2010.95	2256.92
63	333.7	1512.74	703.636	1015.96	1531	2011.35	2258.67
62	333.8	1514.15	703.636	1016.79	1532.33	2013.06	2267.14
61	333.9	1514.92	703.684	1017.04	1532.09	2012.69	2272.5
60	334	1516.24	704.118	1017.6	1535	2015.79	2276.5
59	334.1	1516.77	703.529	1017.69	1535.52	2016.96	2282.27
58	334.2	1518.37	704.444	1018.46	1537.91	2020.47	2286.67
57	334.3	1519	704.444	1018.7	1540.29	2020.95	2291
56	334.4	1519.96	706	1019.55	1540.16	2023.23	2294.21
55	334.5	1520.82	706.4	1019.11	1541.83	2025.33	2299
54	334.6	1521.81	706.25	1020	1542.94	2025.97	2303.81
53	334.7	1522.66	708	1020.43	1543.67	2027.35	2307.27
52	334.8	1523.27	707.857	1020.41	1543.21	2029.31	2310.45
51	334.9	1524.44	709.167	1020.87	1544.81	2031.13	2316.15
50	335	1525.39	710.233	1020.45	1546.73	2031.72	2320.91
49	335.1	1525.95	710.476	1020.64	1547.33	2032.86	2323.89
48	335.2	1527.09	710.851	1021.04	1548.36	2034.91	2326.84
47	335.3	1527.69	710.476	1020.8	1547.93	2036.23	2331.25
46	335.4	1528.88	711.463	1021.11	1550	2039.02	2335
45	335.5	1529.3	711.081	1020.83	1550	2040.76	2337.59
44	335.6	1530.27	711.081	1021.22	1549.14	2040.82	2340.61
43	335.7	1530.61	711.389	1021.02	1547.97	2040.73	2342.7
42	335.8	1531.22	711.562	1021.51	1549.03	2041.69	2345.83
41	335.9	1532.07	712.059	1019.76	1550.31	2044.15	2348
40	336	1532.72	711.818	1020.75	1549	2046.21	2353.1
39	336.1	1533.48	712.121	1021.45	1549.55	2048.12	2353.59
38	336.2	1533.59	711.875	1020.41	1550	2048.69	2356.05
37	336.3	1534.63	711.379	1020.74	1550.3	2051.07	2359
36	336.4	1535.18	711.786	1020.4	1549.49	2054.58	2362.57
35	336.5	1535.61	712.143	1020.38	1549.21	2056.52	2365.67
34	336.6	1536.86	711.2	1019.43	1549.56	2056.73	2368.71
33	336.7	1537.1	711.2	1019.17	1548.48	2058.8	2369.35
32	336.8	1537.48	711.429	1019	1547.71	2060.94	2373.24
31	336.9	1538.49	711.379	1019.39	1549.08	2063.27	2375.14
30	337	1538.4	710	1017.78	1547.14	2063.19	2376.07
29	337.1	1539.64	709.583	1017.89	1547.89	2066.79	2379.58
28	337.2	1539.4	707.778	1018.29	1546.9	2067.78	2378.33
27	337.3	1540.48	707.667	1017.03	1547.11	2070.38	2381.52
26	337.4	1540.81	706.176	1016.75	1547.56	2072.17	2381.43
25	337.5	1541.42	706.667	1015.71	1547.7	2074.64	2383.71
24	337.6	1542.05	706.774	1015.81	1547.81	2075.86	2386.92
23	337.7	1541.88	706.071	1015.23	1546.62	2077.76	2387.58
22	337.8	1542.72	705.862	1015	1546.5	2079.65	2390
21	337.9	1543.38	705.455	1014.32	1546.5	2081.64	2390.65
20	338	1543.75	705.429	1013.9	1545	2083.45	2391.88
19	338.1	1544.1	704.865	1013.72	1544.81	2084.29	2391.82
18	338.2	1544.69	705.143	1013.18	1544.56	2086.91	2393.33
17	338.3	1545.14	704.865	1012.86	1545	2088.45	2395
16	338.4	1545.53	704.857	1012.17	1545.19	2091	2393.33
15	338.5	1545.98	705.312	1012.24	1546.11	2092	2395
14	338.6	1546.42	705	1011.76	1546.71	2094.62	2394.44
13	338.7	1546.65	704.848	1011.04	1545.91	2096.33	2393.71
12	338.8	1547.39	703.793	1010.74	1546.34	2100.57	2395.68
11	338.9	1547.7	703.667	1010.2	1546.51	2101.51	2395.68
10	339	1548.18	703.077	1009.29	1546.63	2103.47	2396.19
9	339.1	1548.56	702	1008.46	1547	2104.6	2397.27
8	339.2	1548.91	702	1008.22	1547.2	2106.5	2396.55
7	339.3	1549.16	701.923	1007.3	1547.16	2108.39	2397.41
6	339.4	1549.98	702.414	1007.3	1547.11	2110.91	2397.93
5	339.5	1550.54	702.143	1006.67	1548	2111.96	2397.5
4	339.6	1550.43	701.034	1005.38	1548.38	2112.25	2396.33
3	339.7	1551.23	700.882	1005.81	1548.33	2115.38	2398.44
2	339.8	1551.72	699.643	1005	1549.18	2116	2396.36
1	339.9	1551.82	699.355	1004.05	1549	2116.59	2397.67
0	340	1552.13	698.235	1003.67	1549.76	2119.77	2399.64

## Sheet: alkalinity
	age	mean	5	16	50	84	95
750	265	1933.08	823.333	1177.5	1845.85	2719.44	3107.27
749	265.1	1933.49	821.515	1174.33	1845.12	2723.42	3112.41
748	265.2	1933.8	820.278	1171.75	1843.8	2726.88	3116.82
747	265.3	1934.09	815.667	1169.09	1842.86	2730.28	3121.79
746	265.4	1934.66	814.483	1164.36	1842.25	2732.97	3126.19
745	265.5	1934.73	811.562	1160.77	1840.27	2735.95	3129.52
744	265.6	1935.5	809.355	1157.45	1838.67	2739.13	3134.4
743	265.7	1935.83	808.148	1155.81	1838.78	2742.96	3138.57
742	265.8	1936.54	804.242	1153.95	1838.25	2747.67	3143.64
741	265.9	1936.71	801.923	1151.63	1836.75	2750.38	3148.4
740	266	1937.75	800	1150	1836.45	2755.76	3155.5
739	266.1	1938.41	799	1148.18	1836.22	2758.25	3161.43
738	266.2	1939.03	796	1145.56	1835.22	2762.33	3165.26
737	266.3	1940.2	795.333	1145.23	1835	2765.95	3170.5
736	266.4	1940.7	792	1141.67	1834.89	2768.46	3174.78
735	266.5	1941.3	790.69	1140	1834	2771.25	3178.7
734	266.6	1942.51	788.387	1137.95	1834.76	2777.88	3185.65
733	266.7	1943.53	787.143	1136.36	1833.95	2781.56	3190
732	266.8	1944.41	784.231	1133.67	1835.24	2784.55	3195.24
731	266.9	1945.24	782.308	1131.35	1835.53	2788.67	3202.35
730	267	1946.25	780	1131.16	1835.4	2793.08	3206.67
729	267.1	1947.31	778.182	1128.51	1836	2796.4	3211.43
728	267.2	1948.29	776.897	1127.55	1836.27	2800	3215.38
727	267.3	1949.44	776.296	1125.77	1837.23	2802.4	3220.56
726	267.4	1950.86	775.417	1123.91	1838.96	2808	3225.33
725	267.5	1952.08	772.8	1123.7	1840.93	2811.61	3230
724	267.6	1953.37	772.4	1122.56	1841.58	2816.07	3235.33
723	267.7	1954.62	771.25	1121.9	1842.73	2819.41	3238.42
722	267.8	1955.72	769.615	1121.52	1843.68	2822.19	3245
721	267.9	1957.28	769.231	1120.53	1844.87	2826.79	3250
720	268	1958.36	767.586	1120	1846	2829.33	3254.62
719	268.1	1959.81	767	1119.06	1847.56	2833.75	3260
718	268.2	1961.48	766.296	1118.48	1849.51	2837.33	3266.92
717	268.3	1962.76	765.667	1119.29	1850.26	2840.51	3269.33
716	268.4	1964.29	765.161	1118.93	1851.7	2843.93	3276.67
715	268.5	1965.49	763.043	1118.21	1853.17	2846.25	3278.5
714	268.6	1967.2	764.375	1117.5	1854.78	2849.17	3286.25
713	268.7	1968.53	763.571	1116.13	1855.56	2853.51	3291.05
712	268.8	1970.15	762.174	1116.43	1856.38	2857.89	3294.21
711	268.9	1971.6	764.643	1115.71	1858.04	2860.54	3298.18
710	269	1973.4	764.091	1116.77	1859.3	2864.57	3305
709	269.1	1974.79	764.286	1116.05	1861.05	2867.14	3307.5
708	269.2	1976.4	764.091	1116.11	1862.94	2869.74	3310.62
707	269.3	1978.14	763.5	1115.9	1864.86	2873.45	3315
706	269.4	1979.67	765	1116.84	1865.71	2877.27	3318.82
705	269.5	1981.24	764.348	1117.03	1866.76	2879.49	3322.31
704	269.6	1982.77	764.545	1116.84	1868.65	2882	3326.92
703	269.7	1984.32	764.545	1117.58	1869.71	2885	3328.82
702	269.8	1986.01	765.652	1117.27	1872.22	2888.16	3332.94
701	269.9	1987.58	766.667	1118.06	1873.24	2891.08	3336.67
700	270	1989.28	768.182	1119.43	1874.44	2894.29	3340
699	270.1	1990.67	768.696	1118.75	1875.43	2895.9	3342
698	270.2	1992.46	768.636	1120.71	1877.35	2898.6	3344.55
697	270.3	1993.89	769.2	1121.59	1878.06	2900	3348.18
696	270.4	1995.93	771.053	1122.62	1880.37	2904.17	3351.54
695	270.5	1997.11	771.905	1122.37	1882.26	2906.19	3353.85
694	270.6	1998.63	772.857	1123.68	1884.05	2907.62	3355
693	270.7	2000.29	773.889	1124.17	1885.76	2909.23	3358
692	270.8	2001.66	775.294	1124.86	1887.58	2912.69	3359
691	270.9	2003.04	776.5	1126.76	1889.12	2914.48	3361.67
690	271	2004.61	778.889	1127.37	1890	2916.47	3362.22
689	271.1	2006.37	779.474	1129.43	1891.79	2918.44	3365.45
688	271.2	2007.71	780.417	1129.71	1893.7	2919.71	3366.67
687	271.3	2009.15	781.364	1131.3	1896.06	2920.77	3368.57
686	271.4	2010.44	782.857	1131.7	1897.37	2924.23	3370.91
685	271.5	2012.01	785.263	1133.33	1900	2926.43	3371.67
684	271.6	2013.13	785.455	1134.08	1900.68	2926.77	3372.73
683	271.7	2014.43	787.391	1134.47	1902.71	2928	3375.83
682	271.8	2015.75	788.095	1135.12	1904.21	2929.26	3376.88
681	271.9	2016.98	789.13	1137.44	1905.41	2930.43	3377.33
680	272	2018.24	792	1139.06	1906.06	2930.5	3378.82
679	272.1	2019.28	792.727	1140.5	1909	2932.5	3378.82
678	272.2	2020.41	796.087	1141.14	1910.24	2933.6	3380.77
677	272.3	2021.66	797.368	1142.7	1911.19	2935.31	3381.25
676	272.4	2022.57	799.412	1143.33	1912.14	2936.06	3382
675	272.5	2023.58	799.474	1144.32	1913.68	2937.33	3382.14
674	272.6	2024.27	801.429	1145.48	1915	2936.67	3382.35
673	272.7	2025.03	802	1146.43	1915.75	2937.33	3383.89
672	272.8	2026.01	803.043	1148.95	1917.32	2937.1	3384.21
671	272.9	2026.9	805.238	1150.22	1918.95	2937.33	3384.21
670	273	2027.79	806.538	1150.95	1920.22	2938.62	3383.75
669	273.1	2028.24	806.923	1151.58	1921.43	2938.28	3383.53
668	273.2	2028.9	807.241	1153.03	1922.08	2938.33	3383.5
667	273.3	2029.5	809.583	1154.17	1923.12	2938.33	3383.89
666	273.4	2029.89	810	1154.44	1923.7	2937.42	3382.86
665	273.5	2029.93	810.435	1154.85	1923.41	2937.59	3382.31
664	273.6	2030.51	812	1155.38	1924.57	2937.41	3381.33
663	273.7	2030.68	812.083	1156.39	1924.57	2937.78	3381.18
662	273.8	2030.93	812.4	1157.71	1924.89	2937.69	3381.33
661	273.9	2031.03	812.5	1158.53	1924.79	2936.79	3381.25
660	274	2030.9	813.929	1158.48	1924.78	2936.8	3381.11
659	274.1	2031.13	814.074	1158.79	1925	2936.54	3380.53
658	274.2	2030.85	813.043	1158.82	1924.77	2935.36	3378.33
657	274.3	2030.78	814.286	1159.43	1924.42	2934.52	3377.22
656	274.4	2030.25	813.75	1158.53	1924.19	2934.64	3376.32
655	274.5	2030.23	814.074	1158.65	1923.86	2934	3376.88
654	274.6	2029.67	812.105	1158.38	1923.25	2932.86	3375.33
653	274.7	2029.28	812.381	1157.56	1923.08	2932.5	3374.71
652	274.8	2028.71	812.593	1157.89	1922.75	2931.85	3374.12
651	274.9	2028.07	812	1156.58	1922.5	2931.79	3374.71
650	275	2027.29	812	1156.32	1921.43	2929.67	3372.86
649	275.1	2026.47	810.4	1155.42	1920.62	2928.33	3370.48
648	275.2	2025.68	809.545	1155.11	1919.5	2928.06	3370
647	275.3	2024.89	808.636	1154.05	1918.97	2927.86	3367.33
646	275.4	2023.84	806.957	1153.17	1917.89	2926.79	3366.67
645	275.5	2022.88	805.217	1152	1916.36	2926.21	3364
644	275.6	2021.83	804.348	1151.19	1915.61	2925.33	3364.12
643	275.7	2020.61	802.857	1149.41	1913.75	2924.29	3364.21
642	275.8	2019.28	800.556	1147.74	1912	2922.86	3363.5
641	275.9	2017.9	798.276	1145	1910.33	2922.26	3362.5
640	276	2016.33	796.786	1143.33	1909.36	2921.33	3360
639	276.1	2014.97	795.455	1141.59	1908.21	2919.19	3359.09
638	276.2	2013.85	791.304	1139.47	1906.75	2919.73	3359
637	276.3	2012.09	789.333	1136.33	1905.75	2919.69	3357.78
636	276.4	2010.48	786.667	1133.16	1904.05	2918.71	3358.24
635	276.5	2008.98	785.517	1131.36	1902.89	2917.93	3356.88
634	276.6	2007.31	783.6	1127.81	1901.79	2917.78	3356.5
633	276.7	2005.4	779.655	1124.36	1899.67	2917.24	3355.79
632	276.8	2003.84	776.774	1121.54	1897.35	2916.67	3355
631	276.9	2001.97	773.75	1117.95	1895.48	2916.33	3355.29
630	277	1999.88	771	1114.44	1892.81	2914.67	3355
629	277.1	1998.2	769.2	1111.4	1891.33	2914.67	3353.68
628	277.2	1996.18	767.2	1106.43	1888.82	2914.48	3353.16
627	277.3	1994.33	764.8	1103.91	1887.81	2914.14	3353.04
626	277.4	1992.35	762.083	1099.51	1885.68	2912.86	3351.9
625	277.5	1990.28	760	1094.63	1883.75	2912.5	3353
624	277.6	1988.03	754.583	1091.56	1880.83	2911.67	3352.63
623	277.7	1986.03	751.923	1086.88	1878.86	2911.85	3352.35
622	277.8	1984.07	749.31	1083.25	1876.19	2911.38	3352.22
621	277.9	1981.83	745	1078	1874.47	2911.52	3352.35
620	278	1979.93	740.476	1075.69	1872.89	2911.43	3354
619	278.1	1977.87	738.519	1071.6	1870.29	2911.67	3354.76
618	278.2	1975.54	735.333	1067.83	1868.82	2911.43	3353.68
617	278.3	1973.42	732.143	1062.91	1867.24	2912	3355.79
616	278.4	1971.36	727.5	1058.57	1864.81	2911.72	3356.67
615	278.5	1969.1	723.125	1054.57	1861.82	2913.23	3357.78
614	278.6	1967.12	718.667	1050.38	1858.4	2913.1	3358.26
613	278.7	1964.91	715.938	1046.74	1855.19	2913.64	3359.09
612	278.8	1962.76	710.938	1041.79	1852.8	2914.06	3360.77
611	278.9	1960.73	705	1037.39	1850	2915	3361.54
610	279	1958.55	701.034	1033.08	1847.43	2915.67	3363.33
609	279.1	1956.58	697.143	1028.8	1846.11	2916.54	3365
608	279.2	1954.46	691.852	1023.62	1843.46	2916.43	3367.89
607	279.3	1952.28	687.2	1018.73	1841.67	2917.41	3368.75
606	279.4	1950.3	683.2	1015.19	1840.67	2917.69	3371.05
605	279.5	1948.31	677.879	1011.74	1839.7	2918.62	3372.73
604	279.6	1946.31	675.152	1007	1837.42	2920	3374.09
603	279.7	1944.51	669.677	1003.82	1834.69	2921.67	3378.33
602	279.8	1942.46	665.6	998.98	1832.35	2922.31	3381.36
601	279.9	1940.45	662.083	994.565	1830	2923.33	3382.27
600	280	1938.59	657.407	990.417	1828.18	2924.4	3383.81
599	280.1	1936.54	654.815	986.8	1824.47	2925.36	3386.11
598	280.2	1934.78	651.034	982.917	1822.62	2926.79	3386.88
597	280.3	1933.03	645.625	979.038	1819.71	2926.67	3391.76
596	280.4	1931.25	641.25	974.912	1817.11	2927.27	3393.53
595	280.5	1929.33	636.333	970.213	1814.48	2928.12	3394.71
594	280.6	1927.59	633.871	966.122	1811.61	2929.26	3396.43
593	280.7	1925.92	627.857	961.837	1809.33	2930.33	3399.44
592	280.8	1924.19	624.375	958.542	1807.2	2929.71	3400.91
591	280.9	1922.52	620	953.83	1803.46	2930.97	3403.33
590	281	1920.94	615.625	949.355	1800.69	2931.72	3406.47
589	281.1	1919.36	610.833	946.792	1798.26	2933.23	3408.95
588	281.2	1917.81	605.667	944.4	1794.8	2934.07	3410.83
587	281.3	1916.3	602.759	940.377	1792.5	2934.8	3413.57
586	281.4	1914.84	597.667	937	1790.36	2936.25	3416
585	281.5	1913.34	593.214	934.59	1787.03	2937.59	3418.24
584	281.6	1911.97	590	930.877	1785.94	2938.57	3420
583	281.7	1910.6	585.556	927.778	1783.08	2940.33	3422.73
582	281.8	1909.21	582.059	924	1781.11	2940.97	3426.92
581	281.9	1907.86	577.179	921.167	1779.71	2941.61	3428.46
580	282	1906.45	573.784	918.148	1778.24	2941.48	3430
579	282.1	1905.4	570.789	914.821	1777.6	2943.33	3431.25
578	282.2	1904.07	566.471	912.373	1775.36	2943.67	3433.68
577	282.3	1902.89	562.727	908.679	1773.2	2944.64	3435.24
576	282.4	1901.75	558.889	905.686	1771.11	2945.67	3437.65
575	282.5	1900.69	555.455	902.917	1769.74	2946.3	3440
574	282.6	1899.57	552	900.192	1767.71	2946.8	3440.71
573	282.7	1898.48	549.231	897.551	1766.25	2947.6	3443.13
572	282.8	1897.41	547.187	894.043	1765	2948.52	3444.62
571	282.9	1896.31	543.437	891.923	1764.17	2949.29	3445.71
570	283	1895.33	540	888.367	1763.33	2950.79	3448.33
569	283.1	1894.52	538.611	886.14	1762.29	2951.58	3449.17
568	283.2	1893.57	535.143	884.545	1760.83	2952.16	3451.18
567	283.3	1892.6	532.647	880.465	1759.12	2952.43	3452.94
566	283.4	1891.83	529.744	877.5	1759.29	2953.16	3454.29
565	283.5	1891	527.778	876.111	1759.13	2953.06	3455
564	283.6	1890.22	524.722	873.261	1757.31	2953.75	3457.86
563	283.7	1889.42	521.562	870.667	1756.21	2954.86	3458.57
562	283.8	1888.82	519.744	869.388	1755.71	2955.29	3461.25
561	283.9	1887.98	518.235	866.875	1754.19	2956.13	3462.31
560	284	1887.28	515.806	864.054	1753.21	2957.93	3463.57
559	284.1	1886.75	513.462	861.579	1752.9	2959.64	3465
558	284.2	1886.15	511.818	859.804	1752.19	2960.56	3466.25
557	284.3	1885.61	509.091	858.75	1751.56	2961.35	3467.14
556	284.4	1884.95	507.879	856.667	1750.62	2961.58	3468.57
555	284.5	1884.44	506.071	855.417	1750	2962.12	3470
554	284.6	1883.97	503.871	853.778	1748.52	2963.33	3473
553	284.7	1883.44	501.875	852.553	1748.15	2964.06	3475
552	284.8	1883.03	499.697	849.762	1747.78	2965	3475.45
551	284.9	1882.66	498.235	848.095	1747.6	2965.71	3476.36
550	285	1882.19	496.562	846.383	1746.67	2965.71	3478.18
549	285.1	1881.94	495.588	845.349	1746	2967	3480
548	285.2	1881.52	493.714	843.542	1745.36	2967.78	3482.31
547	285.3	1881.3	492.632	842.667	1745	2968.85	3483.57
546	285.4	1880.93	490.286	841.304	1745.17	2968.89	3483.57
545	285.5	1880.7	489.355	840.444	1745.17	2969.62	3484.55
544	285.6	1880.46	487.742	839.722	1744.81	2970.37	3486.67
543	285.7	1880.27	486.333	838.125	1744.84	2970	3488.33
542	285.8	1880.11	484.545	836.97	1744.67	2970	3490
541	285.9	1880.02	483.437	835.882	1744.52	2970.91	3490
540	286	1879.87	482.432	834.571	1744.33	2973.2	3490.83
539	286.1	1879.79	481.628	833.611	1744.19	2973.48	3492
538	286.2	1879.74	480.526	832.222	1744	2974	3492.73
537	286.3	1879.79	479.677	832	1743.87	2975	3494.17
536	286.4	1879.77	479	830.638	1743.67	2975.93	3495.38
535	286.5	1879.81	477.419	830.625	1743.55	2976.67	3498
534	286.6	1879.88	476.452	829.412	1743.1	2977.69	3498.18
533	286.7	1880.08	475.667	828.824	1743.55	2978.08	3499
532	286.8	1880.18	476	828.182	1743.67	2978.8	3500.71
531	286.9	1880.37	475.333	827.353	1744	2979.63	3500.77
530	287	1880.57	474.667	826.579	1744.24	2980.38	3502.22
529	287.1	1880.82	473.824	826.579	1744.55	2982.07	3503.33
528	287.2	1881.15	473.143	826.389	1744.72	2982.67	3503.75
527	287.3	1881.36	472.857	826.216	1745.29	2983.33	3505
526	287.4	1881.77	472.647	825.897	1746.06	2984	3505.56
525	287.5	1882.11	472.432	825.526	1745.94	2985	3507
524	287.6	1882.5	472.432	825.641	1746.25	2985.71	3509
523	287.7	1882.91	472.703	825.5	1746.36	2985.71	3509
522	287.8	1883.46	472.703	825.61	1746.77	2987	3511.25
521	287.9	1883.98	472.75	825.25	1747	2987.42	3511.25
520	288	1884.56	473.333	826.053	1747.42	2987.81	3511.43
519	288.1	1885.08	473.333	826	1747.93	2989.29	3513.75
518	288.2	1885.81	474	826.486	1749.31	2989.66	3515
517	288.3	1886.48	474.211	826.579	1751	2991.2	3515.56
516	288.4	1887.2	475.278	827.027	1751.07	2992.69	3515.56
515	288.5	1888.01	475.588	827.632	1752.26	2993.33	3516.67
514	288.6	1888.77	475.946	827.857	1753	2994.64	3516.67
513	288.7	1889.61	476.757	828.718	1753.93	2994.81	3517.5
512	288.8	1890.45	477.838	829.024	1754.52	2995.17	3518.33
511	288.9	1891.42	478.974	829.565	1754.67	2995.52	3520.83
510	289	1892.47	479.487	832.647	1756.54	2996.13	3522.14
509	289.1	1893.41	480.556	832.667	1757.33	2996.9	3522.14
508	289.2	1894.47	482.286	834.848	1757.94	2997.67	3522.31
507	289.3	1895.54	483.846	836.053	1758.44	2998.28	3522.86
506	289.4	1896.66	485.581	837.317	1759.09	2998.79	3523.12
505	289.5	1897.93	487.75	838.333	1761.5	2999.7	3523.33
504	289.6	1899.12	489.024	840.556	1763.64	3000.69	3523.57
503	289.7	1900.48	492	842.778	1764.8	3001.54	3523.85
502	289.8	1901.78	493.5	845.135	1766.4	3002.08	3525
501	289.9	1903.12	495.641	847.429	1768.7	3002.69	3525
500	290	1904.63	497.436	850.217	1770	3003.2	3525.33
499	290.1	1906.04	500.667	852.766	1770.5	3004.67	3525.33
498	290.2	1907.52	503.023	854.222	1771.76	3004.69	3525.62
497	290.3	1909.12	505.312	857.895	1774.44	3005	3524.29
496	290.4	1910.8	508.485	861.176	1776	3005.45	3524
495	290.5	1912.42	510.278	863.673	1777.6	3005.63	3523.75
494	290.6	1914.11	514	865.854	1779.62	3005.94	3522.94
493	290.7	1915.86	517.059	870	1781.74	3006.47	3523.33
492	290.8	1917.62	520.27	872.609	1783.48	3007.19	3523.08
491	290.9	1919.5	523.636	876.531	1786.67	3007.24	3521.76
490	291	1921.41	527.838	880	1787.94	3007.59	3521.58
489	291.1	1923.23	531.429	883.818	1790	3007.43	3521.05
488	291.2	1925.23	535.152	887.368	1792.86	3007.71	3519.23
487	291.3	1927.2	538.889	892.909	1794.69	3007.37	3517.86
486	291.4	1929.33	543.143	897.708	1798.26	3006.92	3516.25
485	291.5	1931.35	546.905	901.087	1800	3006.67	3514.67
484	291.6	1933.41	551.622	907.25	1802.35	3006.11	3512.5
483	291.7	1935.59	555.946	912.391	1804.14	3006.06	3509.47
482	291.8	1937.66	561	916.4	1805.86	3006.11	3507.65
481	291.9	1939.89	565.455	923.585	1808.28	3004.86	3505.62
480	292	1942.12	569.737	929	1809.67	3004.24	3505
479	292.1	1944.46	575.588	934.889	1813.33	3003.87	3500.67
478	292.2	1946.77	580.606	940.4	1815.31	3002.19	3498.12
477	292.3	1948.98	586.129	945.385	1817.74	3001.67	3495.79
476	292.4	1951.22	590.556	951.458	1819.75	3000	3492
475	292.5	1953.48	596.774	955.714	1823.94	2999.17	3488.82
474	292.6	1955.89	602.25	961.86	1825.95	2996.25	3485.45
473	292.7	1958.17	607.568	968.125	1829.46	2993.75	3481
472	292.8	1960.4	613.333	973.333	1832.44	2990.95	3478.33
471	292.9	1962.92	619	980.196	1836.67	2989.66	3473.64
470	293	1965.06	625.714	986.786	1839.29	2988.1	3470
469	293.1	1967.41	631	992.449	1844.05	2986.36	3466.36
468	293.2	1969.49	636.216	1000.2	1846.94	2984	3460
467	293.3	1971.93	643.438	1008.6	1850.77	2982.38	3455.83
466	293.4	1973.99	649.091	1016.47	1853.9	2980	3450
465	293.5	1976.33	656	1025.09	1857.14	2977.89	3444.17
464	293.6	1978.36	662.414	1032.81	1859.23	2973.33	3440
463	293.7	1980.53	668.857	1040.54	1862.29	2970	3431.9
462	293.8	1982.53	676	1046.94	1866.57	2966.25	3423.16
461	293.9	1984.68	683.077	1054.21	1869.52	2962.27	3416.67
460	294	1986.45	689.024	1062.08	1872.44	2958.4	3409.55
459	294.1	1988.46	695.429	1069.73	1875.81	2954.4	3403.64
458	294.2	1990.41	702	1077.73	1880.54	2950.4	3396.47
457	294.3	1992.07	708.158	1084.05	1883.95	2948.57	3387.62
456	294.4	1993.71	713.6	1091.52	1887.58	2945.45	3379
455	294.5	1995.28	719.722	1097.95	1890.26	2940.38	3371.67
454	294.6	1997.05	726.97	1105.09	1894.74	2937.27	3362.61
453	294.7	1998.38	733.846	1110.7	1897.56	2931.71	3353.45
452	294.8	1999.59	738.378	1118.18	1901.14	2927.74	3345
451	294.9	2001	745	1126.59	1904.72	2922.44	3336.19
450	295	2002.14	751.154	1134.1	1908.75	2915.68	3327.89
449	295.1	2003.43	758.065	1143.11	1912.57	2909.47	3321.15
448	295.2	2004.39	763.846	1151.85	1914.69	2903	3311.38
447	295.3	2005.2	768.947	1160.51	1917.78	2896.22	3302.08
446	295.4	2006.16	776.486	1166.38	1919.74	2890.32	3292.96
445	295.5	2007	783.235	1172.38	1923.12	2884.69	3284.58
444	295.6	2007.51	787.727	1178.46	1925.41	2878.18	3274
443	295.7	2007.99	794.75	1184.77	1927.3	2872	3266.77
442	295.8	2008.56	799.714	1191.39	1932.11	2868.28	3258.24
441	295.9	2008.97	806.389	1197.35	1935.41	2862.33	3251.03
440	296	2009.4	811.25	1204.14	1938.33	2859.09	3242.67
439	296.1	2009.43	816.667	1207.94	1943.33	2852.42	3235.52
438	296.2	2009.96	822.143	1214.41	1948.57	2847.39	3229
437	296.3	2009.6	826.765	1218	1951.63	2840.97	3221.67
436	296.4	2010	832.5	1225	1954.52	2835.93	3214.64
435	296.5	2009.74	835.667	1228.79	1957.27	2830.69	3207.04
434	296.6	2009.46	838.71	1232.81	1959.17	2825.36	3199
433	296.7	2009.27	842.812	1236.47	1962	2821.35	3192.69
432	296.8	2009.13	845.862	1240.3	1964.85	2816.67	3185.42
431	296.9	2009.04	850.357	1243.33	1966.79	2812.26	3178.93
430	297	2008.61	852.308	1246.22	1969.03	2808.33	3172.31
429	297.1	2008.1	853.913	1247.71	1970.32	2804.84	3163.93
428	297.2	2007.4	855.862	1250.29	1970.61	2802.06	3160
427	297.3	2007.29	858.929	1250.94	1970.83	2800.59	3155.88
426	297.4	2006.58	860	1252.35	1971.89	2797.94	3152.5
425	297.5	2006.23	860.5	1253.64	1973.06	2795.59	3149.05
424	297.6	2005.56	863.333	1254	1973.44	2792.5	3144.83
423	297.7	2004.97	865	1253.75	1975.59	2792.19	3141.07
422	297.8	2004.48	864.762	1254	1976.05	2788.71	3139.66
421	297.9	2003.84	865.652	1253.6	1976.59	2786.39	3136
420	298	2003.18	865.652	1253.04	1976.19	2784.67	3133.71
419	298.1	2002.33	865.238	1252.61	1976.19	2784.24	3130.32
418	298.2	2001.92	865.6	1253.85	1976.05	2783.42	3128.97
417	298.3	2000.79	865.217	1251.43	1976.19	2782.44	3127.38
416	298.4	2000.2	865	1251.92	1975.79	2782.29	3126.51
415	298.5	1999.56	863.462	1250.8	1975.26	2781.88	3126
414	298.6	1998.58	861.538	1250.36	1974.62	2782.22	3125.95
413	298.7	1997.88	860.345	1249.19	1975.15	2781.92	3126
412	298.8	1997.19	859.6	1248.62	1974.21	2783.48	3126.33
411	298.9	1996.2	859.565	1247.78	1972.82	2785	3128.52
410	299	1995.53	855.455	1245.93	1971.94	2785.52	3130.33
409	299.1	1994.77	852.963	1244.81	1969.67	2786.43	3131.18
408	299.2	1993.57	850.69	1242.9	1967.19	2786.05	3131.56
407	299.3	1993.07	847.2	1240.29	1966.21	2786.86	3132.9
406	299.4	1991.97	844.667	1237.78	1965.33	2787.74	3134.48
405	299.5	1990.93	842.571	1235.12	1964.57	2789.7	3136.8
404	299.6	1989.95	837.586	1233.33	1961.39	2791.56	3138.93
403	299.7	1989.1	834.839	1231.32	1958.29	2793.55	3142
402	299.8	1988.02	830.385	1227.63	1956.52	2795.31	3146.07
401	299.9	1987.23	827.576	1225.58	1954.05	2795.19	3147.1
400	300	1986.15	824.667	1222.78	1951.05	2798.52	3151.62
399	300.1	1985.22	821.333	1218.41	1950.77	2800.33	3155.16
398	300.2	1984.21	818.065	1217.3	1948.11	2802.07	3159.12
397	300.3	1983.02	815.2	1213.19	1946.97	2804.87	3161.54
396	300.4	1982.12	810.357	1210	1944.07	2806.22	3164.72
395	300.5	1980.81	808.333	1206.76	1940.97	2807.81	3167.57
394	300.6	1979.95	803.704	1203.08	1940.56	2811.07	3172.26
393	300.7	1978.82	799.091	1200.95	1938.78	2812.14	3176.18
392	300.8	1977.71	797.241	1198.05	1936.33	2814.62	3178.33
391	300.9	1976.74	794.643	1195	1935	2815.45	3182.81
390	301	1975.67	791.905	1191.67	1932.65	2816.3	3185.95
389	301.1	1974.75	787.692	1188.84	1930	2817.69	3189.39
388	301.2	1973.67	784.828	1185.42	1928.44	2819.13	3192.67
387	301.3	1972.47	782.759	1182.05	1926.76	2819.6	3195
386	301.4	1971.66	779.2	1178.61	1925.41	2821.07	3197.35
385	301.5	1970.38	775.417	1176.18	1923.16	2821.07	3200.37
384	301.6	1969.4	772.632	1172.42	1921.71	2821.79	3203.64
383	301.7	1968.49	770	1170.26	1920.67	2822.8	3206.25
382	301.8	1967.64	768.947	1167.88	1918	2824.55	3208.89
381	301.9	1966.55	765.789	1164.38	1914.57	2826.67	3211.18
380	302	1965.65	762.5	1161	1912.89	2827.93	3213.5
379	302.1	1964.7	760.385	1158.11	1910.73	2829.23	3216.07
378	302.2	1963.75	759.091	1154.39	1908.3	2829.17	3217.78
377	302.3	1962.81	756.087	1150.65	1907.02	2830.8	3220.77
376	302.4	1962.19	753.636	1147.87	1905.32	2832.08	3221.67
375	302.5	1961.04	750.833	1144.26	1904.2	2833.33	3225.31
374	302.6	1960.16	749.615	1142.92	1901.91	2833.21	3226.79
373	302.7	1959.28	746.552	1140.23	1900.21	2834.19	3229.68
372	302.8	1958.65	745.769	1137.56	1899.23	2835.16	3230.83
371	302.9	1957.82	744.194	1134.89	1897.38	2835.48	3234.07
370	303	1957.28	742.308	1133.4	1896.67	2836.9	3234.62
369	303.1	1956.37	740.69	1130.44	1895.38	2838.33	3236.5
368	303.2	1955.81	739.667	1128.41	1893.95	2838.48	3237.22
367	303.3	1955.06	739.231	1126.9	1892.31	2839.06	3238.82
366	303.4	1954.32	738.462	1124.35	1891.54	2839.12	3240
365	303.5	1953.91	736.923	1123.56	1890.5	2840.48	3240.87
364	303.6	1953.57	736.667	1122.14	1888.89	2840.87	3241.05
363	303.7	1952.81	735.517	1119.57	1888.39	2841.3	3241.58
362	303.8	1952.34	734.194	1117.87	1888	2842	3242.73
361	303.9	1951.84	734.286	1116.89	1887.58	2842.67	3243.48
360	304	1951.28	733.667	1115.33	1887.42	2843.45	3243.81
359	304.1	1950.97	733.571	1114.42	1887.14	2843.33	3243.68
358	304.2	1950.55	733.462	1113.72	1886.11	2842.59	3244
357	304.3	1950.2	732.963	1113.26	1885.43	2843.33	3244.44
356	304.4	1949.75	732.903	1111.89	1884.74	2842.73	3243.53
355	304.5	1949.56	733.103	1111.67	1884.72	2843.94	3243.33
354	304.6	1949.38	733.333	1110.27	1884.29	2844.17	3243.33
353	304.7	1949.13	734.4	1110	1883.61	2843.78	3243.64
352	304.8	1948.77	734.8	1109.58	1883.03	2843.72	3242.73
351	304.9	1948.89	734.815	1109.79	1883.23	2843.9	3242.61
350	305	1948.46	734.286	1110	1883.45	2843.75	3241.48
349	305.1	1948.35	735	1109.8	1882.86	2842.56	3241.25
348	305.2	1948.62	735.556	1111.28	1883.23	2842	3239.63
347	305.3	1948.12	736.923	1111.03	1882.94	2842.16	3238.93
346	305.4	1948.1	737.2	1111.08	1882.94	2840.61	3237.41
345	305.5	1948.12	737.6	1111.71	1883.33	2840.31	3236.33
344	305.6	1947.91	738.571	1112.5	1883	2839.6	3235
343	305.7	1947.93	739.231	1113.23	1882.86	2837.86	3233.21
342	305.8	1947.86	740.294	1115.14	1882.82	2838.57	3231.36
341	305.9	1947.59	740.938	1115.38	1882.89	2837.78	3228
340	306	1947.8	741.29	1117.5	1883	2837.69	3226.75
339	306.1	1947.87	742.174	1118.57	1883.85	2836.96	3225.59
338	306.2	1947.73	744.091	1119.27	1884.36	2835.65	3224.84
337	306.3	1947.92	745	1121.5	1884.29	2835	3222.67
336	306.4	1947.71	745.909	1121.08	1884.65	2833.21	3220.37
335	306.5	1947.99	748	1123.25	1885.26	2832.5	3218.29
334	306.6	1948.04	749.474	1125.48	1885.64	2831.25	3216.06
333	306.7	1947.88	750.909	1126.44	1886.32	2828.93	3213.94
332	306.8	1947.95	751.613	1127.73	1888.16	2827.14	3210.59
331	306.9	1947.84	752.414	1130.4	1888.21	2824.69	3208.29
330	307	1948.25	753.2	1132.45	1888.21	2823.43	3206.84
329	307.1	1947.79	755	1133.02	1888.81	2821	3202.5
328	307.2	1948.04	755.667	1134.88	1890	2818.21	3199
327	307.3	1948.05	757.143	1136.98	1890.42	2817.03	3198.06
326	307.4	1947.93	758.621	1138.37	1890.81	2816.76	3193.75
325	307.5	1947.97	760.312	1140	1890.77	2814.29	3193.14
324	307.6	1947.89	761.515	1142.31	1891.43	2812.22	3186.87
323	307.7	1948.06	763.143	1144	1892.31	2810.86	3185.86
322	307.8	1947.77	764.595	1146.27	1892.5	2808.75	3180.83
321	307.9	1947.93	765.882	1147.83	1894.24	2807.35	3178.93
320	308	1947.69	767.632	1150.43	1894.55	2803.59	3177.5
319	308.1	1947.47	769.167	1151.05	1895.13	2801.52	3171.74
318	308.2	1947.52	770	1152.89	1895.12	2797.8	3169.38
317	308.3	1947.48	773.462	1154.05	1895.58	2796.43	3167.81
316	308.4	1947.1	774.074	1155.28	1895	2794.19	3165.38
315	308.5	1946.75	776	1157.58	1894.26	2790.36	3159.72
314	308.6	1946.88	778.519	1158.53	1895.35	2789.14	3158.24
313	308.7	1946.41	779.31	1160	1894.77	2786.29	3153.48
312	308.8	1946.23	781.154	1161.88	1894.38	2784.52	3152
311	308.9	1945.74	783.6	1163.45	1894	2783	3146.3
310	309	1945.68	785.2	1164.62	1893.56	2779.68	3143.81
309	309.1	1945.51	786.923	1166.67	1892.86	2778.93	3140.83
308	309.2	1944.73	788.4	1168.48	1891.86	2775.33	3137.14
307	309.3	1944.61	789.2	1170.26	1892.44	2774.67	3134.06
306	309.4	1944.25	789.2	1172.16	1892.09	2772.42	3130
305	309.5	1943.41	790.588	1172.82	1892.09	2768.75	3126.11
304	309.6	1942.88	790.769	1174.36	1892.05	2766.06	3122.73
303	309.7	1942.82	792.857	1176.59	1891.59	2764.38	3118.62
302	309.8	1942.17	793.333	1178.29	1889.78	2761.07	3115.76
301	309.9	1941.88	795.556	1178.33	1889.77	2759.09	3113.23
300	310	1941.15	795.789	1180	1888.67	2755.94	3107.59
299	310.1	1940.67	797.368	1181.67	1888.67	2754.29	3105
298	310.2	1940.2	797.895	1182.62	1888.89	2752.33	3101.79
297	310.3	1939.55	798.889	1182.82	1887.25	2750.94	3096.06
296	310.4	1938.93	800	1182.97	1885.9	2747.27	3095.31
295	310.5	1938.17	800.5	1184.29	1885.43	2745.16	3090
294	310.6	1937.65	801.579	1184.71	1884.07	2742.65	3086.39
293	310.7	1936.93	801.905	1185.59	1883.44	2740.32	3083.33
292	310.8	1936.44	801.579	1186.67	1882.97	2736.47	3081.38
291	310.9	1935.4	802.222	1188.48	1882.75	2734.19	3076.21
290	311	1934.96	801.579	1189.66	1882.27	2732.5	3075
289	311.1	1934.19	803	1190.49	1882.73	2729.69	3070.43
288	311.2	1933.4	803.333	1191.14	1882.22	2727.88	3069.29
287	311.3	1932.77	802.222	1191.76	1883.17	2725.59	3067.24
286	311.4	1931.86	802.632	1191.48	1881.75	2724.29	3064.4
285	311.5	1931.03	802	1192.5	1880.59	2721.29	3061.07
284	311.6	1930.44	801.765	1192.86	1880.75	2720.29	3059.09
283	311.7	1929.86	801.111	1193.44	1881.03	2718.21	3056.67
282	311.8	1928.93	801.333	1194.06	1880	2715.81	3054.14
281	311.9	1928.03	801.25	1194.52	1878.16	2713.23	3052.07
280	312	1927.27	800.625	1194.07	1877.78	2711.33	3050.77
279	312.1	1926.44	799.412	1194.29	1877.32	2710.65	3047.42
278	312.2	1925.88	800	1194.07	1876.28	2709.44	3048.08
277	312.3	1925.4	800	1193.79	1875.95	2707.63	3045.91
276	312.4	1924.65	799.444	1193.79	1874	2706.1	3045.42
275	312.5	1923.7	799	1192.67	1873.68	2704.5	3044.5
274	312.6	1922.8	797.222	1191.61	1871.47	2702.5	3042.17
273	312.7	1922.14	797	1192.58	1870.25	2700.95	3042.26
272	312.8	1921.13	796.667	1192.06	1869.27	2699.55	3041.15
271	312.9	1920.49	795.909	1192	1869.49	2697.25	3039.2
270	313	1919.77	795.652	1190.77	1868.1	2696.38	3039.57
269	313.1	1919.06	795.217	1191.03	1866.36	2695.42	3037.5
268	313.2	1918.28	793.81	1188.95	1865.53	2694.23	3037.27
267	313.3	1917.77	792	1189.38	1864.39	2693.88	3036.3
266	313.4	1916.94	791	1189.35	1863.33	2692.98	3035.71
265	313.5	1916.18	790.952	1189.33	1862.73	2690.26	3034.52
264	313.6	1915.6	790.8	1188.52	1860.81	2691.32	3035.17
263	313.7	1915	789.474	1187.04	1859.74	2689.73	3035.48
262	313.8	1914.4	789.048	1185.94	1859.7	2690	3035.77
261	313.9	1913.55	789.048	1185.29	1857.94	2690.3	3037.04
260	314	1912.66	786.19	1184.12	1857.1	2689.17	3037.08
259	314.1	1912.4	786.364	1182.67	1855.79	2690	3037.92
258	314.2	1911.72	785.238	1180.94	1855.43	2689.14	3038.42
257	314.3	1911.41	783.75	1180	1853.82	2689.23	3040
256	314.4	1910.48	782.917	1179.31	1852.56	2689.09	3041.25
255	314.5	1910.13	782.5	1178.67	1851.43	2689.31	3042
254	314.6	1909.61	781.2	1176.45	1850.27	2689.67	3044.71
253	314.7	1908.76	779.444	1175.33	1849.12	2690.48	3045.31
252	314.8	1908.16	780	1173.67	1847.57	2690	3045.76
251	314.9	1907.78	779.412	1172.81	1846.32	2688.29	3048.57
250	315	1907.2	777.5	1171.21	1846.05	2688.29	3051.48
249	315.1	1906.78	776.667	1170	1846.18	2687.37	3054.33
248	315.2	1906.36	774.545	1169.25	1846.77	2687.37	3055.17
247	315.3	1905.99	774.167	1168.21	1844.85	2688.18	3056.9
246	315.4	1905.47	771.429	1167	1843.44	2688.61	3059.63
245	315.5	1904.93	770.952	1165	1842.29	2688.18	3061.25
244	315.6	1904.42	770	1163.66	1841.4	2688.68	3062.26
243	315.7	1904.25	769.048	1163	1840.24	2688.5	3063.64
242	315.8	1903.95	768.5	1162.05	1838.27	2689.75	3066.52
241	315.9	1903.6	766.5	1160.51	1837.32	2690	3068.5
240	316	1903.01	765.5	1158.38	1837.37	2689.39	3069.44
239	316.1	1902.61	765	1157.18	1836.79	2689.6	3070
238	316.2	1902.41	763.75	1155.5	1836.6	2692.12	3071.67
237	316.3	1901.81	762.778	1153.41	1835.66	2692.81	3072.63
236	316.4	1901.43	762.273	1152.11	1834.8	2694.05	3075.26
235	316.5	1901.27	760.952	1151.71	1834.05	2695.28	3075.88
234	316.6	1901.13	759.333	1150.71	1833.33	2696.67	3077.22
233	316.7	1900.3	757.037	1148.21	1831.67	2696	3078.82
232	316.8	1900.19	755.333	1147	1830.75	2697.18	3079.52
231	316.9	1899.82	754.643	1146.59	1830.65	2698.11	3080
230	317	1899.62	754	1145.38	1828.93	2698.81	3081.67
229	317.1	1899.23	752.083	1143.24	1829.57	2698.37	3083.16
228	317.2	1899.18	749.697	1142.16	1829.55	2699.75	3085.65
227	317.3	1898.75	749.697	1141.14	1829.77	2700	3087.27
226	317.4	1898.55	748.571	1140.59	1830	2701.89	3087.31
225	317.5	1898.3	747.419	1138.68	1830	2703.41	3088.85
224	317.6	1897.89	746.667	1136.43	1830.23	2704.19	3091.36
223	317.7	1897.83	747.037	1135.24	1830	2705.48	3092.08
222	317.8	1897.56	745.926	1134.25	1830.2	2705.5	3093.85
221	317.9	1897.33	745.556	1132.5	1830.21	2706.39	3095
220	318	1897.1	744.8	1131.18	1830.4	2707.11	3096.19
219	318.1	1896.86	743.333	1128.97	1830	2708.82	3096.8
218	318.2	1896.85	742	1128.97	1829.77	2710.7	3098
217	318.3	1896.52	742.5	1128.18	1828.81	2710.77	3098.95
216	318.4	1896.49	740.952	1126.77	1829.36	2712.16	3099.47
215	318.5	1896.44	741.5	1127.22	1828.75	2712.78	3100
214	318.6	1896.05	740.526	1125.95	1828	2713.14	3098.89
213	318.7	1896.08	741	1124.69	1827.61	2713.64	3100
212	318.8	1895.58	739.231	1123.14	1828.65	2713.75	3101.9
211	318.9	1895.8	739.655	1123.24	1829.41	2715.15	3100.53
210	319	1895.45	740.476	1121.21	1828.86	2715	3101.05
209	319.1	1895.51	740.476	1120	1828.61	2715.94	3102.22
208	319.2	1895.45	740.435	1120	1828.6	2716	3102.5
207	319.3	1895.54	740	1119.02	1827.71	2717.59	3102.5
206	319.4	1895.25	739.643	1118.5	1827.66	2717.07	3102.35
205	319.5	1895.13	740	1117.89	1827.23	2716.92	3102.86
204	319.6	1895.25	742.083	1118.86	1828.14	2716.84	3103.33
203	319.7	1895.21	742.4	1118.5	1827.55	2717.11	3102.5
202	319.8	1894.85	742.308	1117.91	1827.6	2716.76	3101.67
201	319.9	1895.14	742.593	1118.6	1828.87	2716.49	3102.11
200	320	1894.96	742.8	1117.29	1829.79	2716.29	3102.69
199	320.1	1895.26	744.762	1118.43	1829.8	2716.56	3102.69
198	320.2	1895.17	746	1117.69	1829.81	2717	3102.5
197	320.3	1895.2	745.5	1118.6	1830.73	2716.21	3102.8
196	320.4	1895.31	745.909	1119.17	1831.4	2716.33	3101.36
195	320.5	1895.27	747.619	1119.8	1831.22	2715.94	3100
194	320.6	1895.19	748.8	1119.81	1832.44	2715.14	3098.93
193	320.7	1895.4	751.724	1121.43	1833.88	2713.55	3098.8
192	320.8	1895.41	752.069	1121.9	1834.31	2713.75	3098.89
191	320.9	1895.81	754.091	1123.04	1836.88	2712.81	3097.65
190	321	1896.07	756.316	1124.05	1836.53	2712.5	3097.22
189	321.1	1896.08	758.947	1124.62	1837.25	2712.12	3094.76
188	321.2	1895.87	758.636	1125.24	1836.75	2711.43	3092.69
187	321.3	1896.17	760.417	1126.44	1838.05	2710.28	3090
186	321.4	1896.14	762.963	1127.23	1838	2707.31	3087.31
185	321.5	1896.51	766.5	1128.51	1837.92	2706.82	3086.21
184	321.6	1896.79	769	1130.51	1838.27	2703.46	3083.48
183	321.7	1897.14	771.875	1132.56	1839.61	2702.69	3082.5
182	321.8	1897.49	774.333	1133.85	1841.95	2700.87	3079.26
181	321.9	1897.94	775.667	1135	1843.03	2698.53	3077.14
180	322	1897.86	776.897	1135.56	1844.15	2696.39	3074.07
179	322.1	1898.3	780.357	1137.07	1845.96	2694	3070.91
178	322.2	1898.43	782.593	1138.84	1847.17	2692.11	3070
177	322.3	1898.8	786	1139.55	1849.13	2690	3067.73
176	322.4	1899.07	788.438	1141.11	1851.11	2689	3063.85
175	322.5	1899.39	790.937	1143.78	1853.27	2686.86	3061.67
174	322.6	1899.94	794.516	1145.12	1855.11	2685.33	3059.52
173	322.7	1900.06	796.562	1147.69	1856.28	2683	3058.75
172	322.8	1900.89	800.968	1150.21	1857.23	2680.94	3055.5
171	322.9	1900.92	802.759	1151.33	1857.67	2677.81	3051.76
170	323	1901.72	806.087	1153.81	1860.27	2675.68	3050
169	323.1	1901.83	810	1155.12	1862.57	2673.95	3044.71
168	323.2	1902.41	812.174	1159.03	1865.32	2672.89	3040.95
167	323.3	1902.78	816	1158.95	1867.17	2670.47	3038.95
166	323.4	1903.16	820	1160.75	1868.4	2666.98	3033.75
165	323.5	1903.8	822.857	1163.33	1872.55	2665.9	3030.45
164	323.6	1904.3	825.152	1165.71	1874.88	2663.61	3026.09
163	323.7	1904.79	827.5	1167.86	1878.05	2661.39	3023.33
162	323.8	1905.47	832.727	1170	1878.51	2661.43	3018.08
161	323.9	1906.1	835	1171.75	1880	2658.62	3014.64
160	324	1906.65	839.63	1174.35	1882.62	2654.85	3007.39
159	324.1	1907.43	841.739	1177.23	1885.56	2651.61	3003.04
158	324.2	1907.82	846.25	1179.78	1886.74	2648.67	2996
157	324.3	1908.8	849.048	1183.78	1888.42	2645.45	2991.43
156	324.4	1909.47	853.043	1185.58	1892.07	2643.16	2987
155	324.5	1910.05	855.769	1187.89	1893.92	2639.53	2980
154	324.6	1911.14	859.583	1192.38	1895.6	2637.17	2974.29
153	324.7	1911.47	863.2	1194.87	1896.73	2634.78	2971.56
152	324.8	1912.4	865.769	1197.78	1898.12	2632.89	2964.86
151	324.9	1913.48	869.6	1200.56	1899.58	2632.22	2961.67
150	325	1913.97	872.273	1202.35	1900.53	2629.51	2956.92
149	325.1	1915	875.714	1206.18	1902.78	2626.57	2950.91
148	325.2	1915.67	878.846	1209.17	1902.78	2623.42	2945.38
147	325.3	1916.86	883.158	1212.86	1905.37	2619.8	2940.45
146	325.4	1917.86	885.789	1215.53	1908.05	2617.92	2933.89
145	325.5	1918.54	889.545	1219.19	1910	2614.07	2929.5
144	325.6	1920.01	894.444	1222.94	1912.68	2612.34	2926.47
143	325.7	1920.39	896.5	1225.14	1915.23	2608.75	2918.85
142	325.8	1921.96	901	1228.57	1917.87	2605.33	2916.4
141	325.9	1922.79	903.333	1231.62	1920.43	2601.19	2912.31
140	326	1924.22	905.455	1234.47	1923.86	2599.59	2908.7
139	326.1	1925.21	908.182	1238.24	1925.37	2597.97	2904.07
138	326.2	1926.13	912.083	1240.32	1927.5	2594.68	2899
137	326.3	1927.68	915	1243.14	1929.5	2594.18	2893.5
136	326.4	1928.91	920.333	1246.58	1931.54	2591.36	2889.57
135	326.5	1930.25	921.667	1249.74	1934.88	2590.52	2885
134	326.6	1930.94	923.5	1253.1	1938.46	2589.2	2879.2
133	326.7	1932.69	926.667	1257.27	1941.54	2587.01	2877.83
132	326.8	1934.31	929.231	1260.98	1944	2588.47	2876.5
131	326.9	1935.32	932.632	1263.33	1944.72	2587.1	2874
130	327	1936.78	937.778	1265.53	1947.88	2586.85	2870.67
129	327.1	1938.43	940.385	1268.33	1948.67	2588.09	2870
128	327.2	1939.75	944.615	1270.94	1951.54	2587.36	2867.89
127	327.3	1941.44	946	1275.88	1954.41	2586.13	2865.33
126	327.4	1943.07	948.75	1279.21	1958.21	2584.82	2865
125	327.5	1944.73	951.905	1281.56	1960.44	2584.26	2865
124	327.6	1946.39	954.211	1286.1	1963.92	2583.27	2864.44
123	327.7	1948.28	958.333	1289.46	1967.66	2582.65	2865
122	327.8	1949.89	959.583	1292.73	1969.81	2582.74	2862.5
121	327.9	1951.72	962	1296.49	1972.88	2582.54	2861.58
120	328	1953.28	965.357	1301	1976.19	2582.67	2862.38
119	328.1	1955.28	968.519	1306	1979.66	2582.9	2862.86
118	328.2	1957.62	970.435	1310	1983.39	2583.46	2862.22
117	328.3	1958.88	974.5	1314.48	1985.74	2582.35	2862
116	328.4	1960.69	978	1317.03	1987.8	2582.08	2861.33
115	328.5	1962.99	981.364	1320	1991.49	2582.41	2863.18
114	328.6	1964.92	982.105	1324.84	1994.44	2582.5	2864.29
113	328.7	1966.69	984.783	1327.86	1996	2583.09	2867.22
112	328.8	1968.91	988	1332.19	1998.52	2583.44	2865.2
111	328.9	1971.27	992.917	1336.76	2003.17	2582.42	2865.19
110	329	1972.58	996.522	1338.89	2005.53	2580.59	2862.86
109	329.1	1974.83	1000.91	1343	2007.84	2581.64	2865.22
108	329.2	1977.38	1002.5	1347.11	2013.68	2582.81	2863.7
107	329.3	1979.32	1005.83	1352	2016.54	2582.45	2862.92
106	329.4	1981.67	1009.13	1355.35	2019.63	2583.65	2861.18
105	329.5	1983.11	1012.31	1357.44	2022.25	2584.33	2861.18
104	329.6	1985.31	1016.67	1362.13	2024	2585	2860.95
103	329.7	1987.94	1020	1366.39	2027.19	2586.67	2862.27
102	329.8	1989.95	1023.75	1370	2028.98	2588.12	2860.91
101	329.9	1992.31	1026.36	1373.51	2032.41	2587.68	2862.8
100	330	1994.14	1028.21	1377.75	2034.07	2589.12	2861.5
99	330.1	1996.2	1030.62	1382.2	2037.37	2588.57	2860.91
98	330.2	1998.39	1034.29	1385.53	2039.06	2590	2863.33
97	330.3	2000.68	1035.83	1388.48	2043.4	2591.11	2862.92
96	330.4	2002.46	1038.33	1390.57	2045.48	2591.96	2860.48
95	330.5	2005	1041.43	1394.36	2050.4	2592.93	2861.74
94	330.6	2007.26	1044.38	1397.6	2053.59	2593.89	2865
93	330.7	2008.45	1045.95	1399.81	2055.68	2594.19	2866.84
92	330.8	2010.64	1047.14	1403.95	2058.94	2595.08	2864.74
91	330.9	2012.7	1050	1406.36	2062.39	2597.9	2868.42
90	331	2015.24	1053.24	1409.69	2063.75	2599.84	2870.45
89	331.1	2017.05	1054.38	1412.11	2066.84	2601.38	2870
88	331.2	2019.19	1056.67	1413.71	2069.43	2603.51	2871.25
87	331.3	2020.71	1057.33	1415.62	2070.24	2604.6	2871.11
86	331.4	2022.69	1059.67	1419.03	2072.61	2606.36	2868.89
85	331.5	2024.23	1060	1421.76	2074.26	2609.19	2870
84	331.6	2026.38	1061.74	1424.12	2076.8	2612.83	2868.26
83	331.7	2028.1	1065.6	1426.18	2076.61	2614.41	2871.25
82	331.8	2029.79	1067.62	1427.63	2078.41	2616.25	2870.56
81	331.9	2031.24	1068.26	1430	2080	2617.1	2870
80	332	2033.13	1069.17	1432.79	2081.43	2620	2872.22
79	332.1	2034.54	1070.4	1434.25	2082.98	2620	2870.53
78	332.2	2036.56	1071.5	1435.79	2084.47	2622.68	2876.5
77	332.3	2037.65	1072.5	1437.18	2085.86	2624.34	2875.38
76	332.4	2039.11	1073.5	1440.59	2086.21	2627.22	2880
75	332.5	2040.71	1072.5	1441	2086.95	2631.6	2882
74	332.6	2042.03	1074.55	1445.19	2087.31	2634.53	2881
73	332.7	2042.9	1074.29	1448.57	2087.67	2637.39	2881.11
72	332.8	2044.27	1075	1449.52	2090.23	2637.41	2884.17
71	332.9	2045.54	1075.83	1451.28	2089.64	2640.31	2884.74
70	333	2046.82	1076	1451.11	2091.46	2641.77	2885.56
69	333.1	2047.58	1077.37	1454	2091.84	2641.55	2886.8
68	333.2	2048.79	1077.83	1454.25	2093.18	2643.77	2888.7
67	333.3	2049.28	1077.2	1455	2095.15	2642.98	2892.27
66	333.4	2050.41	1078.57	1456.97	2095.93	2643.8	2894.78
65	333.5	2051.12	1079.05	1457.5	2096.42	2644.17	2898.64
64	333.6	2052.05	1079.47	1457.57	2097.59	2645	2901.54
63	333.7	2052.13	1078.89	1459	2097.64	2644.6	2903.18
62	333.8	2053.14	1079.38	1458.33	2098.17	2644.13	2908.08
61	333.9	2053.62	1078.89	1458.14	2098	2644.14	2912.22
60	334	2054.59	1078.67	1458.78	2101.04	2645.49	2914.81
59	334.1	2054.32	1078.67	1457.44	2100.29	2645.37	2918.44
58	334.2	2055.53	1078.75	1458.25	2101.33	2645.76	2922.8
57	334.3	2055.67	1078.67	1458.06	2102.62	2646.25	2926.67
56	334.4	2056.05	1079.33	1457.32	2102.46	2646.73	2927.5
55	334.5	2056.17	1081.11	1457.3	2102.13	2647.71	2930.38
54	334.6	2056.51	1078.75	1457.14	2102.34	2646.38	2932.76
53	334.7	2056.82	1079.38	1458.14	2103.02	2646.91	2935.71
52	334.8	2056.48	1078.67	1457.62	2101.69	2647.09	2938.75
51	334.9	2057.03	1078.67	1456.98	2102.68	2647.59	2941.76
50	335	2057.13	1078.46	1457.07	2103.48	2648.03	2945.83
49	335.1	2056.69	1076.92	1455.61	2103.04	2647.6	2949.6
48	335.2	2057.04	1075.38	1454.86	2103.73	2648.52	2952.19
47	335.3	2056.65	1074.17	1454.72	2102.21	2647.27	2955.38
46	335.4	2056.96	1075.38	1454.63	2102.93	2648.14	2958.26
45	335.5	2056.64	1075.62	1455	2101.88	2647.12	2960.29
44	335.6	2056.61	1075.33	1454.41	2100.93	2647.59	2962.65
43	335.7	2055.81	1074.67	1452.41	2098.21	2648.33	2964.12
42	335.8	2055.58	1074.71	1451.43	2098.08	2647.08	2965.71
41	335.9	2055.51	1074.62	1449.51	2097.33	2647.87	2967.6
40	336	2055	1073.12	1450.29	2094.83	2646.43	2969.67
39	336.1	2054.88	1074	1450.28	2093.39	2646.78	2970.32
38	336.2	2053.91	1074.29	1448.82	2091.3	2645.25	2972
37	336.3	2053.94	1072.86	1448.48	2090.57	2646.25	2973.33
36	336.4	2053.32	1071.9	1445.61	2087.83	2647.12	2974.74
35	336.5	2052.66	1070.5	1444.39	2086.92	2646.72	2975.94
34	336.6	2052.84	1070	1444.63	2085.86	2647.29	2976.55
33	336.7	2052.19	1069.47	1442.82	2083.82	2647.36	2976.67
32	336.8	2051.34	1067.89	1441.22	2081.73	2648.39	2977.71
31	336.9	2051.5	1068	1440.85	2083.54	2649.07	2979.68
30	337	2050.2	1066.47	1437.78	2079.83	2648.55	2980.57
29	337.1	2050.37	1064.44	1436.8	2079.29	2650.58	2982.29
28	337.2	2049.16	1063.12	1435.62	2076.84	2649.63	2981.62
27	337.3	2049.06	1062.78	1435.12	2077.06	2651.72	2983.14
26	337.4	2048.41	1062	1433.81	2075.92	2651.51	2982.31
25	337.5	2047.9	1060	1432.55	2075.42	2652.59	2983.55
24	337.6	2047.56	1060.62	1432.24	2075.1	2652.88	2983.06
23	337.7	2046.18	1059.5	1430.91	2072.71	2653.04	2983.03
22	337.8	2046.2	1059.47	1430	2072.37	2654.15	2982.07
21	337.9	2045.73	1058	1428.12	2071.21	2654.92	2982.9
20	338	2044.92	1057.39	1427.05	2069	2655.96	2984
19	338.1	2044.52	1056.82	1426.98	2069.13	2656	2982.93
18	338.2	2044.1	1056.52	1426.1	2068.24	2657.29	2982.97
17	338.3	2043.53	1055.91	1425.26	2067.14	2656.53	2982.12
16	338.4	2043.03	1055.24	1425.12	2066.4	2657.6	2980.88
15	338.5	2042.42	1054.09	1423.75	2065.32	2656.67	2978.86
14	338.6	2041.89	1052.73	1423.33	2065.1	2657.14	2978.71
13	338.7	2041.14	1052.61	1423.06	2064.31	2657.57	2977.06
12	338.8	2041.02	1051.67	1421.43	2063.86	2660	2978.06
11	338.9	2040.36	1051.07	1420.39	2063.39	2660.43	2977.5
10	339	2039.87	1051.03	1420.18	2063.62	2659.3	2975.81
9	339.1	2039.44	1048	1417.29	2063.77	2658.94	2975.86
8	339.2	2038.99	1048	1417.39	2064.69	2659.32	2975
7	339.3	2038.26	1046.5	1415.32	2064.09	2659.58	2974
6	339.4	2037.97	1045.22	1415.61	2064.38	2660.86	2974.44
5	339.5	2038.1	1044.21	1414.72	2064	2662.89	2974.07
4	339.6	2037.04	1044	1413.57	2064.5	2663.08	2972.22
3	339.7	2037.06	1042.38	1412.29	2064.59	2665.23	2971.47
2	339.8	2036.76	1041.36	1412.73	2065.16	2664.89	2971.05
1	339.9	2036.19	1040	1411.56	2064.18	2664.62	2969.67
0	340	2035.52	1037.5	1410	2063.92	2665.95	2970.7

## Sheet: saturation_state
	age	mean	5	16	50	84	95
750	265	6.5786	2.70286	3.75958	6.5936	9.52	10.516
749	265.1	6.56521	2.69222	3.75	6.58545	9.518	10.5113
748	265.2	6.55357	2.685	3.73647	6.56	9.51333	10.5122
747	265.3	6.53971	2.67	3.71947	6.54611	9.5	10.505
746	265.4	6.52983	2.66429	3.70071	6.5319	9.50455	10.5125
745	265.5	6.51918	2.656	3.68471	6.513	9.50111	10.5057
744	265.6	6.50951	2.6475	3.66722	6.51036	9.49737	10.5143
743	265.7	6.50274	2.64	3.65143	6.50421	9.492	10.5225
742	265.8	6.49507	2.62571	3.637	6.49667	9.49538	10.53
741	265.9	6.48912	2.62	3.61882	6.492	9.49929	10.535
740	266	6.48406	2.6075	3.603	6.48667	9.49714	10.5393
739	266.1	6.48023	2.5975	3.596	6.48133	9.50364	10.5663
738	266.2	6.47742	2.584	3.58583	6.47333	9.51	10.5822
737	266.3	6.47697	2.576	3.58235	6.478	9.5125	10.594
736	266.4	6.47401	2.56375	3.5629	6.46529	9.521	10.61
735	266.5	6.47444	2.54947	3.54905	6.469	9.53053	10.634
734	266.6	6.47406	2.54583	3.54667	6.46385	9.53611	10.6433
733	266.7	6.47734	2.54444	3.54314	6.46462	9.55875	10.67
732	266.8	6.4785	2.52917	3.52941	6.46111	9.56833	10.69
731	266.9	6.48231	2.525	3.52694	6.45933	9.58357	10.6988
730	267	6.48693	2.52133	3.52562	6.45733	9.60091	10.7327
729	267.1	6.49163	2.50739	3.52444	6.46462	9.6115	10.7589
728	267.2	6.50032	2.50235	3.52364	6.46625	9.64417	10.7833
727	267.3	6.50959	2.50278	3.5225	6.47615	9.66417	10.8125
726	267.4	6.51577	2.50188	3.51	6.48187	9.68	10.84
725	267.5	6.52695	2.49889	3.50974	6.48786	9.69471	10.861
724	267.6	6.53892	2.5	3.52167	6.50143	9.72	10.8978
723	267.7	6.55107	2.49615	3.52167	6.51087	9.752	10.9317
722	267.8	6.56395	2.49091	3.52156	6.51652	9.78143	10.965
721	267.9	6.57549	2.49	3.52233	6.52	9.78857	10.99
720	268	6.59007	2.49143	3.52286	6.54533	9.83059	11.025
719	268.1	6.60344	2.49167	3.52541	6.55609	9.84222	11.0617
718	268.2	6.62025	2.4925	3.54034	6.55955	9.86684	11.0925
717	268.3	6.64134	2.49444	3.54412	6.59083	9.905	11.1367
716	268.4	6.65578	2.5	3.54857	6.592	9.93	11.164
715	268.5	6.67581	2.49429	3.5484	6.62	9.96667	11.198
714	268.6	6.69674	2.50125	3.56148	6.63455	10.0027	11.2443
713	268.7	6.71419	2.5	3.56615	6.652	10.0288	11.2817
712	268.8	6.73589	2.50417	3.582	6.673	10.064	11.3286
711	268.9	6.75999	2.508	3.59	6.68909	10.1011	11.3647
710	269	6.78027	2.50786	3.60182	6.71083	10.1333	11.4029
709	269.1	6.8059	2.522	3.61867	6.733	10.176	11.4488
708	269.2	6.83007	2.525	3.63077	6.75111	10.214	11.4925
707	269.3	6.85335	2.52889	3.64455	6.76625	10.245	11.53
706	269.4	6.88221	2.54222	3.66125	6.798	10.2833	11.5783
705	269.5	6.9071	2.54462	3.67818	6.821	10.326	11.6189
704	269.6	6.93039	2.54583	3.69125	6.84182	10.3571	11.6692
703	269.7	6.96178	2.54933	3.71083	6.87077	10.4	11.724
702	269.8	6.9871	2.56875	3.72	6.88937	10.4333	11.772
701	269.9	7.01644	2.57778	3.74	6.925	10.4756	11.8225
700	270	7.04837	2.6	3.755	6.9575	10.52	11.8691
699	270.1	7.07867	2.60455	3.77182	6.98444	10.565	11.9367
698	270.2	7.10795	2.6075	3.79095	7.01333	10.6	11.9767
697	270.3	7.13698	2.61667	3.8108	7.045	10.6375	12.0267
696	270.4	7.16866	2.63222	3.83571	7.08	10.6771	12.0733
695	270.5	7.19882	2.62556	3.84545	7.11333	10.725	12.119
694	270.6	7.23242	2.63545	3.86143	7.15222	10.77	12.185
693	270.7	7.26325	2.64714	3.885	7.19333	10.8109	12.2278
692	270.8	7.2951	2.65727	3.9	7.22143	10.8525	12.276
691	270.9	7.32707	2.67	3.92625	7.25	10.8992	12.3375
690	271	7.35879	2.68857	3.94385	7.26958	10.9462	12.395
689	271.1	7.39108	2.70167	3.96824	7.30333	10.99	12.4357
688	271.2	7.42223	2.70667	3.98538	7.34333	11.0336	12.475
687	271.3	7.45518	2.72143	4.00667	7.38	11.086	12.5264
686	271.4	7.48481	2.72818	4.01667	7.41	11.1167	12.5725
685	271.5	7.51908	2.74375	4.05107	7.44778	11.1656	12.6125
684	271.6	7.54855	2.75	4.05842	7.47857	11.2107	12.664
683	271.7	7.58201	2.77133	4.08917	7.506	11.252	12.6994
682	271.8	7.61438	2.77364	4.11077	7.54	11.2847	12.748
681	271.9	7.64348	2.78	4.1275	7.55437	11.33	12.784
680	272	7.67211	2.79462	4.145	7.59	11.3613	12.8344
679	272.1	7.70301	2.79714	4.16467	7.62222	11.4017	12.8693
678	272.2	7.73376	2.812	4.18667	7.6375	11.4413	12.9189
677	272.3	7.76133	2.83	4.21	7.67571	11.47	12.9471
676	272.4	7.78957	2.838	4.22667	7.70333	11.518	13.0013
675	272.5	7.81449	2.85286	4.245	7.72667	11.5383	13.0237
674	272.6	7.84134	2.8675	4.26	7.746	11.581	13.0671
673	272.7	7.86451	2.87571	4.2675	7.76818	11.6025	13.1022
672	272.8	7.89275	2.88571	4.30111	7.80353	11.645	13.1357
671	272.9	7.91321	2.89857	4.30773	7.82571	11.6614	13.158
670	273	7.93514	2.906	4.336	7.84294	11.6924	13.1767
669	273.1	7.95586	2.91625	4.348	7.865	11.7143	13.1985
668	273.2	7.97689	2.92833	4.37333	7.88353	11.7367	13.2262
667	273.3	7.99459	2.93833	4.38182	7.905	11.7622	13.245
666	273.4	8.01136	2.94444	4.39273	7.92187	11.7811	13.2655
665	273.5	8.02296	2.95	4.4025	7.9225	11.8	13.2758
664	273.6	8.0433	2.96571	4.41625	7.95143	11.8213	13.302
663	273.7	8.05412	2.96857	4.426	7.95667	11.8331	13.3087
662	273.8	8.06371	2.96875	4.42933	7.969	11.8417	13.322
661	273.9	8.0721	2.97625	4.4425	7.98273	11.845	13.328
660	274	8.07868	2.98125	4.44267	7.988	11.8605	13.3408
659	274.1	8.08517	2.98429	4.45154	7.99143	11.8612	13.346
658	274.2	8.09035	2.9825	4.44857	8.00333	11.862	13.3514
657	274.3	8.09425	2.991	4.45583	8.01286	11.8627	13.3567
656	274.4	8.08913	2.99071	4.4475	8.01	11.8624	13.3567
655	274.5	8.09149	2.9875	4.4525	8.01143	11.86	13.3482
654	274.6	8.08745	2.99111	4.44786	8.003	11.8533	13.3494
653	274.7	8.08049	2.98778	4.44	8	11.8393	13.3467
652	274.8	8.07419	2.98222	4.43538	7.99125	11.835	13.3308
651	274.9	8.06383	2.97889	4.43357	7.98444	11.816	13.3145
650	275	8.05107	2.976	4.4225	7.975	11.804	13.281
649	275.1	8.03834	2.96875	4.41214	7.972	11.7826	13.2761
648	275.2	8.02185	2.96333	4.404	7.95444	11.7637	13.255
647	275.3	8.00393	2.96	4.389	7.929	11.7373	13.2256
646	275.4	7.98424	2.94667	4.378	7.912	11.7112	13.195
645	275.5	7.96265	2.93571	4.37	7.885	11.68	13.174
644	275.6	7.93804	2.925	4.34524	7.84722	11.65	13.1412
643	275.7	7.91201	2.91	4.33429	7.83	11.6139	13.1025
642	275.8	7.88088	2.90167	4.305	7.79167	11.579	13.0677
641	275.9	7.84903	2.88692	4.2825	7.759	11.5363	13.0237
640	276	7.8176	2.86571	4.26038	7.72375	11.509	12.9864
639	276.1	7.78219	2.85818	4.23667	7.687	11.4493	12.9357
638	276.2	7.74301	2.84571	4.21211	7.64	11.414	12.8684
637	276.3	7.70449	2.82833	4.17923	7.61	11.36	12.8333
636	276.4	7.66235	2.79867	4.14846	7.55857	11.3136	12.7725
635	276.5	7.62353	2.79158	4.124	7.51941	11.2643	12.7191
634	276.6	7.57621	2.75824	4.08444	7.47923	11.2	12.662
633	276.7	7.52902	2.75077	4.04846	7.429	11.1543	12.61
632	276.8	7.4836	2.728	4.01786	7.38125	11.102	12.5514
631	276.9	7.4304	2.70429	3.97923	7.33091	11.0319	12.48
630	277	7.37819	2.68143	3.94444	7.2825	10.9629	12.4217
629	277.1	7.32709	2.656	3.91167	7.23	10.8933	12.3475
628	277.2	7.27069	2.635	3.86909	7.17214	10.828	12.2781
627	277.3	7.21324	2.60714	3.8164	7.09842	10.7573	12.1983
626	277.4	7.15727	2.578	3.7755	7.05333	10.6845	12.1325
625	277.5	7.09652	2.54692	3.73308	6.992	10.6138	12.052
624	277.6	7.03331	2.52214	3.69167	6.92	10.5356	11.97
623	277.7	6.97194	2.49875	3.64545	6.865	10.4643	11.8975
622	277.8	6.91168	2.47	3.605	6.80381	10.39	11.8211
621	277.9	6.84615	2.4425	3.5475	6.74	10.3091	11.726
620	278	6.78047	2.4125	3.50556	6.67083	10.2189	11.636
619	278.1	6.71502	2.38625	3.46583	6.59818	10.1333	11.5386
618	278.2	6.64962	2.356	3.42182	6.541	10.039	11.4622
617	278.3	6.58037	2.32417	3.36917	6.468	9.96111	11.3636
616	278.4	6.51168	2.28	3.3184	6.4025	9.86261	11.274
615	278.5	6.44109	2.254	3.27136	6.32923	9.77111	11.1871
614	278.6	6.37202	2.225	3.2275	6.261	9.67714	11.0875
613	278.7	6.30235	2.193	3.18455	6.189	9.59125	10.9911
612	278.8	6.23358	2.15778	3.14143	6.11818	9.504	10.8933
611	278.9	6.16144	2.12667	3.09364	6.05	9.40308	10.7847
610	279	6.09164	2.09437	3.04211	5.97154	9.31231	10.6946
609	279.1	6.02255	2.061	2.99571	5.88846	9.224	10.598
608	279.2	5.95011	2.02375	2.94765	5.809	9.11737	10.492
607	279.3	5.87564	1.98778	2.90053	5.74067	9.02778	10.3913
606	279.4	5.80669	1.95714	2.85571	5.664	8.941	10.2893
605	279.5	5.73795	1.92455	2.81143	5.59172	8.84417	10.2113
604	279.6	5.66615	1.88091	2.75667	5.51257	8.74778	10.1018
603	279.7	5.59486	1.85385	2.71933	5.4475	8.63545	9.99444
602	279.8	5.52535	1.81714	2.67385	5.3725	8.5381	9.895
601	279.9	5.45557	1.78733	2.63333	5.29625	8.44111	9.78769
600	280	5.38749	1.76357	2.58889	5.22438	8.34429	9.69417
599	280.1	5.3167	1.73	2.54192	5.15	8.24429	9.59
598	280.2	5.25218	1.7	2.50382	5.07933	8.15571	9.495
597	280.3	5.18343	1.6725	2.46667	5.005	8.05333	9.397
596	280.4	5.11725	1.62833	2.42667	4.94308	7.95375	9.28722
595	280.5	5.04997	1.605	2.38609	4.86929	7.86583	9.19333
594	280.6	4.98733	1.575	2.34364	4.80333	7.766	9.105
593	280.7	4.92213	1.54273	2.29703	4.74	7.68444	9.006
592	280.8	4.85765	1.515	2.255	4.6725	7.59462	8.91
591	280.9	4.79698	1.48857	2.22278	4.59947	7.5125	8.8175
590	281	4.7347	1.45818	2.1875	4.53714	7.4325	8.725
589	281.1	4.67428	1.43077	2.15167	4.47917	7.34167	8.63667
588	281.2	4.61398	1.39235	2.11667	4.41143	7.26158	8.55833
587	281.3	4.55699	1.37371	2.085	4.34857	7.18	8.47
586	281.4	4.49808	1.351	2.05056	4.29545	7.09167	8.38364
585	281.5	4.44207	1.32333	2.00864	4.23364	7.01238	8.30286
584	281.6	4.38694	1.29867	1.98409	4.18294	6.927	8.215
583	281.7	4.33286	1.27385	1.95448	4.12154	6.84696	8.13
582	281.8	4.27978	1.24706	1.9244	4.0587	6.7636	8.03615
581	281.9	4.2275	1.22316	1.885	4.00833	6.69333	7.9675
580	282	4.17888	1.20077	1.86773	3.95842	6.62091	7.88667
579	282.1	4.12735	1.17938	1.84192	3.90636	6.544	7.805
578	282.2	4.0802	1.14688	1.81429	3.85615	6.47667	7.73571
577	282.3	4.03376	1.12968	1.78583	3.79857	6.409	7.664
576	282.4	3.98683	1.11588	1.7585	3.75478	6.34	7.58222
575	282.5	3.94129	1.09706	1.73368	3.715	6.26556	7.50692
574	282.6	3.89856	1.08133	1.709	3.66583	6.208	7.44455
573	282.7	3.85496	1.06389	1.68464	3.62167	6.13478	7.3775
572	282.8	3.81395	1.04588	1.65042	3.58214	6.07765	7.30571
571	282.9	3.77553	1.02875	1.62822	3.5292	6.0184	7.24667
570	283	3.73316	1.01056	1.61462	3.49538	5.96125	7.184
569	283.1	3.69744	0.997222	1.59529	3.45688	5.91125	7.115
568	283.2	3.66032	0.980588	1.57571	3.42105	5.86091	7.05167
567	283.3	3.62557	0.966	1.55667	3.38333	5.80417	7
566	283.4	3.59099	0.942222	1.54048	3.34526	5.7575	6.93625
565	283.5	3.55922	0.934737	1.5235	3.29972	5.71167	6.882
564	283.6	3.52622	0.927368	1.50909	3.27441	5.663	6.83071
563	283.7	3.4931	0.91	1.48917	3.24412	5.61133	6.76667
562	283.8	3.46617	0.903571	1.47571	3.22	5.55889	6.72143
561	283.9	3.43579	0.890833	1.45917	3.188	5.51591	6.67625
560	284	3.40927	0.88	1.44467	3.16	5.4825	6.6275
559	284.1	3.38246	0.872143	1.43059	3.13444	5.44286	6.57667
558	284.2	3.35671	0.862308	1.41923	3.109	5.41	6.535
557	284.3	3.33279	0.855	1.39462	3.08545	5.37417	6.49
556	284.4	3.30936	0.843571	1.38167	3.05	5.33714	6.45583
555	284.5	3.28715	0.826667	1.376	3.029	5.30313	6.41556
554	284.6	3.26397	0.819286	1.37	3.00733	5.26429	6.3725
553	284.7	3.2449	0.814375	1.35846	2.996	5.245	6.33667
552	284.8	3.22691	0.811765	1.34889	2.98	5.22385	6.30565
551	284.9	3.20935	0.806667	1.33941	2.96389	5.19556	6.283
550	285	3.1915	0.8	1.33158	2.94687	5.168	6.254
549	285.1	3.17595	0.794375	1.32214	2.9344	5.14231	6.23111
548	285.2	3.15983	0.788333	1.314	2.91833	5.11818	6.205
547	285.3	3.14625	0.781765	1.305	2.9096	5.09143	6.1775
546	285.4	3.13346	0.775238	1.298	2.90167	5.073	6.162
545	285.5	3.11936	0.77	1.289	2.88842	5.05083	6.13222
544	285.6	3.1081	0.766364	1.28059	2.8813	5.035	6.11667
543	285.7	3.10003	0.761875	1.27542	2.87444	5.0181	6.09733
542	285.8	3.09181	0.757222	1.26794	2.87107	5.0112	6.09067
541	285.9	3.08284	0.756316	1.2645	2.86208	4.9975	6.07833
540	286	3.07536	0.752174	1.25958	2.853	4.988	6.05688
539	286.1	3.06882	0.750476	1.25519	2.8456	4.97714	6.05
538	286.2	3.06319	0.7455	1.25304	2.84235	4.97214	6.03714
537	286.3	3.06004	0.744667	1.248	2.83828	4.96778	6.03
536	286.4	3.0568	0.740556	1.24571	2.83909	4.95727	6.01438
535	286.5	3.05328	0.738947	1.24429	2.83667	4.95182	6.01
534	286.6	3.05446	0.737222	1.245	2.84211	4.95222	6.00833
533	286.7	3.05507	0.736	1.2419	2.84476	4.95333	6.01
532	286.8	3.05553	0.735882	1.24278	2.8487	4.955	6.00167
531	286.9	3.05715	0.734286	1.24368	2.85474	4.95882	6.00143
530	287	3.06076	0.733529	1.24647	2.85944	4.96154	6.01118
529	287.1	3.06414	0.733529	1.24722	2.86389	4.96692	6.01067
528	287.2	3.06951	0.7335	1.25	2.874	4.9725	6.01375
527	287.3	3.07575	0.734444	1.25053	2.88105	4.985	6.01813
526	287.4	3.08286	0.73619	1.255	2.89111	4.99	6.035
525	287.5	3.09232	0.736667	1.26045	2.90375	5.00222	6.04429
524	287.6	3.10169	0.738824	1.264	2.91769	5.01158	6.05333
523	287.7	3.11362	0.740476	1.26947	2.93308	5.03667	6.078
522	287.8	3.12494	0.742222	1.27529	2.94667	5.05185	6.09
521	287.9	3.13935	0.744118	1.28	2.96615	5.07833	6.114
520	288	3.15527	0.748947	1.28765	2.98769	5.09375	6.13333
519	288.1	3.16999	0.750588	1.29421	3.00158	5.12176	6.15833
518	288.2	3.1883	0.755909	1.3032	3.00951	5.15	6.18286
517	288.3	3.20761	0.76	1.30955	3.04077	5.17667	6.2225
516	288.4	3.22806	0.766522	1.31857	3.0631	5.20643	6.25286
515	288.5	3.25055	0.773478	1.32952	3.09158	5.23824	6.28833
514	288.6	3.27297	0.777	1.34227	3.11619	5.26548	6.328
513	288.7	3.29693	0.784762	1.3545	3.146	5.30417	6.36556
512	288.8	3.32368	0.7916	1.36938	3.176	5.34359	6.40636
511	288.9	3.35221	0.8008	1.375	3.21045	5.39	6.45615
510	289	3.38197	0.8085	1.38933	3.243	5.43167	6.501
509	289.1	3.41393	0.813256	1.41125	3.27394	5.48278	6.55364
508	289.2	3.44689	0.817297	1.42769	3.31257	5.51818	6.613
507	289.3	3.47895	0.823684	1.44091	3.3525	5.57471	6.664
506	289.4	3.51681	0.844118	1.45938	3.39176	5.62789	6.73333
505	289.5	3.55462	0.855294	1.47783	3.43286	5.68273	6.795
504	289.6	3.59436	0.866471	1.4965	3.47125	5.74353	6.865
503	289.7	3.63706	0.88	1.51895	3.5212	5.8	6.93286
502	289.8	3.68025	0.892941	1.53947	3.56391	5.86875	7.01188
501	289.9	3.72518	0.906875	1.56176	3.61437	5.93077	7.09429
500	290	3.77372	0.922143	1.586	3.66308	6.005	7.18778
499	290.1	3.82538	0.9352	1.61125	3.71867	6.07733	7.26929
498	290.2	3.87662	0.944667	1.62969	3.77031	6.15417	7.36625
497	290.3	3.9311	0.974	1.65381	3.81864	6.24	7.45909
496	290.4	3.98631	0.9915	1.69615	3.88357	6.308	7.55231
495	290.5	4.04259	1.01	1.72467	3.94071	6.40385	7.65375
494	290.6	4.10651	1.02737	1.75588	4.00308	6.50444	7.76583
493	290.7	4.16801	1.04812	1.78952	4.05667	6.59111	7.87222
492	290.8	4.23269	1.07	1.82467	4.12636	6.68167	7.98333
491	290.9	4.30277	1.09167	1.862	4.1975	6.78867	8.1075
490	291	4.37322	1.11357	1.89143	4.26212	6.88842	8.22286
489	291.1	4.44518	1.12808	1.93833	4.33182	7.006	8.345
488	291.2	4.5196	1.16455	1.98077	4.40187	7.117	8.46333
487	291.3	4.59626	1.19176	2.022	4.4725	7.22615	8.6
486	291.4	4.67551	1.22067	2.069	4.55217	7.33846	8.724
485	291.5	4.75733	1.25	2.11385	4.62937	7.45667	8.85833
484	291.6	4.84301	1.283	2.16063	4.71273	7.58692	9.00778
483	291.7	4.93005	1.31	2.2075	4.79778	7.71	9.14714
482	291.8	5.01832	1.34538	2.25462	4.888	7.84136	9.28533
481	291.9	5.11087	1.37522	2.31769	4.977	7.97	9.44
480	292	5.20462	1.41222	2.36875	5.05913	8.11083	9.588
479	292.1	5.3019	1.45286	2.42353	5.161	8.25222	9.74143
478	292.2	5.40165	1.48933	2.48444	5.25222	8.403	9.902
477	292.3	5.50158	1.529	2.52972	5.34714	8.5385	10.0525
476	292.4	5.6047	1.568	2.605	5.45167	8.69364	10.218
475	292.5	5.70908	1.60778	2.66824	5.55222	8.83875	10.3917
474	292.6	5.81826	1.64667	2.74	5.655	8.989	10.56
473	292.7	5.92713	1.70714	2.79815	5.7613	9.13857	10.7375
472	292.8	6.03728	1.758	2.87933	5.87	9.28429	10.9183
471	292.9	6.15089	1.81	2.96091	5.975	9.44187	11.078
470	293	6.26573	1.85909	3.02682	6.085	9.60667	11.2644
469	293.1	6.38092	1.90364	3.10636	6.20455	9.76167	11.4325
468	293.2	6.4971	1.96167	3.185	6.30905	9.91909	11.615
467	293.3	6.6168	2.007	3.2712	6.438	10.082	11.7813
466	293.4	6.73653	2.07167	3.34818	6.55071	10.24	11.96
465	293.5	6.85712	2.12667	3.43455	6.67	10.4011	12.1367
464	293.6	6.97941	2.178	3.50889	6.78917	10.5682	12.315
463	293.7	7.10168	2.23286	3.61	6.907	10.7233	12.49
462	293.8	7.22355	2.279	3.69765	7.01722	10.8927	12.66
461	293.9	7.34597	2.336	3.77857	7.13583	11.0373	12.834
460	294	7.4663	2.39	3.8825	7.255	11.1969	13.025
459	294.1	7.59221	2.44	3.975	7.3825	11.3627	13.1983
458	294.2	7.71411	2.4925	4.07294	7.4975	11.5319	13.3667
457	294.3	7.83167	2.54333	4.16455	7.59643	11.69	13.5263
456	294.4	7.9527	2.6	4.25111	7.71	11.8482	13.6933
455	294.5	8.07073	2.65818	4.343	7.82455	12.0013	13.854
454	294.6	8.19135	2.71875	4.44	7.942	12.15	14.005
453	294.7	8.30936	2.78	4.5195	8.05375	12.302	14.154
452	294.8	8.41969	2.84	4.59905	8.15833	12.4375	14.2814
451	294.9	8.53465	2.896	4.69417	8.27667	12.5809	14.4267
450	295	8.64787	2.95714	4.78889	8.38667	12.7267	14.5567
449	295.1	8.75374	3.01	4.869	8.49143	12.8467	14.6825
448	295.2	8.86078	3.0825	4.95875	8.592	12.9767	14.8057
447	295.3	8.96459	3.135	5.04444	8.69	13.0887	14.93
446	295.4	9.06335	3.195	5.13143	8.783	13.1944	15.0292
445	295.5	9.15938	3.253	5.21667	8.865	13.305	15.1525
444	295.6	9.25841	3.29909	5.30056	8.96857	13.41	15.264
443	295.7	9.3459	3.36625	5.38636	9.06333	13.4909	15.3475
442	295.8	9.43209	3.415	5.4575	9.165	13.585	15.44
441	295.9	9.51533	3.476	5.54077	9.25125	13.6744	15.522
440	296	9.59934	3.526	5.61455	9.356	13.765	15.6043
439	296.1	9.66997	3.56833	5.675	9.4275	13.8417	15.69
438	296.2	9.74223	3.63	5.73818	9.532	13.9217	15.7633
437	296.3	9.80651	3.675	5.80417	9.59875	14.005	15.8271
436	296.4	9.87341	3.725	5.87556	9.69636	14.07	15.8833
435	296.5	9.93349	3.7525	5.932	9.78533	14.135	15.9283
434	296.6	9.98518	3.79083	5.98571	9.861	14.1921	15.9787
433	296.7	10.0363	3.81385	6.04125	9.94	14.2333	16.0175
432	296.8	10.0823	3.852	6.08143	10.0125	14.2692	16.05
431	296.9	10.1242	3.89	6.12333	10.0636	14.31	16.0733
430	297	10.1602	3.9225	6.16125	10.1119	14.3445	16.1117
429	297.1	10.1976	3.93714	6.194	10.1871	14.3665	16.135
428	297.2	10.2214	3.9525	6.22	10.2164	14.3925	16.1457
427	297.3	10.2464	3.981	6.24667	10.278	14.415	16.152
426	297.4	10.2676	3.99	6.26579	10.32	14.4287	16.165
425	297.5	10.2834	4.004	6.28571	10.3607	14.435	16.1736
424	297.6	10.2932	4.015	6.29889	10.3687	14.438	16.1767
423	297.7	10.3001	4.01875	6.302	10.394	14.4322	16.17
422	297.8	10.3048	4.0175	6.303	10.4262	14.4283	16.16
421	297.9	10.3034	4.035	6.305	10.4309	14.4214	16.1467
420	298	10.298	4.04	6.30385	10.425	14.4125	16.1337
419	298.1	10.2874	4.02	6.295	10.4114	14.4	16.105
418	298.2	10.2773	4.01875	6.294	10.4045	14.3818	16.0754
417	298.3	10.2615	4.01286	6.26733	10.39	14.3567	16.06
416	298.4	10.2414	4.01167	6.264	10.3692	14.33	16.03
415	298.5	10.221	3.99667	6.25375	10.3533	14.2867	16
414	298.6	10.19	3.9825	6.236	10.3111	14.2617	15.9633
413	298.7	10.1669	3.9675	6.214	10.2871	14.223	15.933
412	298.8	10.1319	3.95	6.18	10.2556	14.1733	15.8887
411	298.9	10.0967	3.94	6.166	10.1995	14.1192	15.8508
410	299	10.0585	3.925	6.13278	10.1743	14.0842	15.805
409	299.1	10.0231	3.9	6.1	10.1387	14.032	15.7575
408	299.2	9.97884	3.8775	6.06	10.0842	13.985	15.7125
407	299.3	9.93325	3.85	6.035	10.0367	13.9288	15.6625
406	299.4	9.8862	3.8175	5.99857	9.99125	13.8625	15.6056
405	299.5	9.83619	3.792	5.96429	9.9415	13.8055	15.562
404	299.6	9.78574	3.75625	5.92533	9.86944	13.7457	15.51
403	299.7	9.73312	3.74	5.89182	9.78588	13.6778	15.4462
402	299.8	9.67979	3.706	5.84632	9.72385	13.6132	15.3943
401	299.9	9.62757	3.6825	5.82375	9.66125	13.5536	15.3367
400	300	9.57011	3.648	5.78455	9.59	13.4813	15.265
399	300.1	9.51335	3.6225	5.73833	9.51867	13.4086	15.1955
398	300.2	9.45258	3.58167	5.69556	9.44333	13.3386	15.138
397	300.3	9.39569	3.54385	5.65125	9.39	13.2678	15.0667
396	300.4	9.33602	3.50455	5.59688	9.325	13.1919	14.9911
395	300.5	9.27832	3.48	5.55375	9.26333	13.1165	14.9233
394	300.6	9.21618	3.44625	5.51211	9.18714	13.039	14.8525
393	300.7	9.16013	3.41636	5.47	9.116	12.9855	14.7817
392	300.8	9.0994	3.38375	5.418	9.055	12.9125	14.725
391	300.9	9.04032	3.35375	5.378	8.99333	12.8447	14.6625
390	301	8.98277	3.3175	5.328	8.928	12.7664	14.595
389	301.1	8.92232	3.29077	5.27	8.86095	12.6938	14.5243
388	301.2	8.86695	3.25615	5.22769	8.78111	12.6307	14.4491
387	301.3	8.80861	3.22333	5.17833	8.72333	12.5638	14.395
386	301.4	8.75538	3.193	5.14	8.674	12.4942	14.3287
385	301.5	8.69988	3.15727	5.09333	8.60769	12.435	14.2711
384	301.6	8.64328	3.125	5.04091	8.535	12.3608	14.198
383	301.7	8.59098	3.09	5.00278	8.48	12.3025	14.14
382	301.8	8.54104	3.06125	4.97333	8.4225	12.2416	14.065
381	301.9	8.49114	3.02786	4.94091	8.36333	12.18	14.005
380	302	8.4438	3.005	4.90286	8.3175	12.1153	13.9433
379	302.1	8.3962	2.98625	4.86182	8.275	12.064	13.8971
378	302.2	8.35018	2.965	4.82385	8.216	12.0133	13.8467
377	302.3	8.3058	2.93889	4.78091	8.16636	11.9467	13.78
376	302.4	8.26637	2.924	4.7608	8.11526	11.901	13.7425
375	302.5	8.22226	2.90143	4.71917	8.081	11.8485	13.6883
374	302.6	8.18404	2.8825	4.693	8.03	11.7896	13.6467
373	302.7	8.14669	2.8675	4.664	8	11.7575	13.5929
372	302.8	8.11455	2.855	4.64083	7.95625	11.7208	13.554
371	302.9	8.07962	2.835	4.611	7.915	11.6839	13.5125
370	303	8.04843	2.82	4.58	7.87375	11.6443	13.4729
369	303.1	8.01907	2.79778	4.55067	7.84143	11.6137	13.4412
368	303.2	7.99297	2.79125	4.53556	7.81	11.5814	13.4114
367	303.3	7.96679	2.77375	4.51	7.7875	11.5579	13.365
366	303.4	7.94557	2.77167	4.484	7.76176	11.5323	13.3458
365	303.5	7.92285	2.751	4.475	7.73857	11.5073	13.3218
364	303.6	7.90565	2.75182	4.46	7.7175	11.4891	13.284
363	303.7	7.88742	2.742	4.44444	7.697	11.4743	13.2731
362	303.8	7.87257	2.725	4.42692	7.68333	11.465	13.2557
361	303.9	7.85978	2.72	4.40909	7.665	11.4475	13.234
360	304	7.84765	2.706	4.39692	7.65222	11.4429	13.2317
359	304.1	7.83974	2.70667	4.39	7.63375	11.4416	13.2125
358	304.2	7.83173	2.7	4.38467	7.631	11.4355	13.1992
357	304.3	7.82571	2.69	4.37727	7.624	11.4411	13.1944
356	304.4	7.82376	2.694	4.37111	7.62083	11.4444	13.194
355	304.5	7.82346	2.68571	4.37455	7.6175	11.4433	13.1978
354	304.6	7.82283	2.69167	4.37455	7.615	11.4454	13.1969
353	304.7	7.82707	2.68667	4.3775	7.61545	11.47	13.1988
352	304.8	7.83095	2.69167	4.37917	7.61727	11.4833	13.2222
351	304.9	7.83618	2.692	4.38571	7.61917	11.4829	13.2263
350	305	7.84514	2.695	4.3825	7.62778	11.5056	13.2429
349	305.1	7.85141	2.6975	4.38923	7.634	11.5129	13.2557
348	305.2	7.86625	2.704	4.40571	7.64	11.528	13.2737
347	305.3	7.87818	2.7125	4.413	7.66	11.5543	13.286
346	305.4	7.89196	2.72333	4.42182	7.67818	11.576	13.32
345	305.5	7.90689	2.73143	4.437	7.68857	11.6044	13.34
344	305.6	7.92293	2.73	4.44556	7.7025	11.633	13.36
343	305.7	7.94151	2.74	4.4525	7.73	11.6633	13.3871
342	305.8	7.96271	2.742	4.47	7.75	11.6913	13.4171
341	305.9	7.98406	2.75231	4.47667	7.7665	11.73	13.447
340	306	8.00742	2.756	4.50667	7.8	11.7578	13.4822
339	306.1	8.03141	2.75933	4.51381	7.81	11.7857	13.5109
338	306.2	8.05582	2.77647	4.53357	7.84118	11.8322	13.5314
337	306.3	8.08099	2.792	4.55	7.87333	11.8619	13.5775
336	306.4	8.10767	2.7965	4.55842	7.88762	11.9073	13.6136
335	306.5	8.13531	2.82375	4.58375	7.92	11.9409	13.651
334	306.6	8.16384	2.84333	4.59941	7.952	11.9811	13.6817
333	306.7	8.19338	2.857	4.63	7.98444	12.0227	13.728
332	306.8	8.22439	2.8725	4.64455	8.01778	12.0611	13.7643
331	306.9	8.25595	2.8825	4.67364	8.04	12.105	13.81
330	307	8.2844	2.9	4.70364	8.084	12.14	13.84
329	307.1	8.3174	2.9125	4.71667	8.112	12.19	13.8967
328	307.2	8.35187	2.93	4.74091	8.14556	12.2329	13.94
327	307.3	8.38288	2.94833	4.76562	8.18	12.2693	13.97
326	307.4	8.41727	2.96889	4.79	8.21714	12.3267	14.0229
325	307.5	8.44537	2.99143	4.808	8.23818	12.3617	14.0637
324	307.6	8.48296	3.00364	4.84286	8.27556	12.408	14.1125
323	307.7	8.5156	3.02385	4.87	8.312	12.4413	14.16
322	307.8	8.55233	3.04353	4.89615	8.34625	12.49	14.21
321	307.9	8.58536	3.04818	4.92667	8.38167	12.5295	14.2427
320	308	8.61944	3.065	4.95143	8.416	12.58	14.2761
319	308.1	8.65246	3.08714	4.96923	8.4475	12.6174	14.32
318	308.2	8.68578	3.11111	4.99556	8.48556	12.6669	14.3575
317	308.3	8.71721	3.12667	5.01591	8.51667	12.697	14.395
316	308.4	8.74864	3.14286	5.0475	8.54	12.745	14.4333
315	308.5	8.78047	3.16	5.05818	8.57714	12.7821	14.4686
314	308.6	8.81085	3.17462	5.09059	8.6	12.8193	14.4938
313	308.7	8.84388	3.1925	5.1225	8.644	12.8625	14.526
312	308.8	8.87333	3.2075	5.14333	8.67	12.9017	14.5729
311	308.9	8.90311	3.222	5.16714	8.69167	12.94	14.61
310	309	8.93469	3.24	5.19714	8.736	12.9736	14.64
309	309.1	8.96059	3.255	5.215	8.7625	13.012	14.664
308	309.2	8.98904	3.27455	5.23615	8.78462	13.035	14.696
307	309.3	9.016	3.294	5.2525	8.82	13.0737	14.7271
306	309.4	9.04068	3.313	5.26583	8.83818	13.101	14.755
305	309.5	9.06444	3.314	5.286	8.86462	13.1195	14.7754
304	309.6	9.08963	3.33667	5.30474	8.888	13.164	14.804
303	309.7	9.11244	3.36	5.3375	8.89875	13.1825	14.814
302	309.8	9.13512	3.36667	5.35	8.92	13.2114	14.8333
301	309.9	9.15203	3.3875	5.365	8.93818	13.2263	14.8475
300	310	9.17267	3.39429	5.38571	8.94778	13.25	14.8567
299	310.1	9.19057	3.4075	5.398	8.97714	13.2708	14.866
298	310.2	9.20794	3.415	5.415	9	13.2773	14.887
297	310.3	9.22028	3.4225	5.425	9.01	13.2893	14.8975
296	310.4	9.2347	3.43	5.43875	9.02286	13.3122	14.905
295	310.5	9.24717	3.42667	5.4425	9.03545	13.3227	14.9167
294	310.6	9.25873	3.44	5.45375	9.03818	13.3333	14.92
293	310.7	9.26939	3.44333	5.466	9.06857	13.3387	14.9267
292	310.8	9.27877	3.45333	5.47667	9.08833	13.3487	14.9367
291	310.9	9.28635	3.46	5.48615	9.098	13.35	14.9411
290	311	9.28883	3.455	5.49091	9.102	13.3538	14.93
289	311.1	9.29402	3.46	5.49667	9.09	13.3538	14.9325
288	311.2	9.29694	3.47143	5.50333	9.09667	13.3545	14.9367
287	311.3	9.30024	3.46333	5.50125	9.11273	13.3575	14.9225
286	311.4	9.29989	3.45857	5.50125	9.11556	13.3467	14.916
285	311.5	9.29812	3.46	5.50333	9.11636	13.3386	14.9143
284	311.6	9.29527	3.464	5.494	9.115	13.3308	14.8957
283	311.7	9.2933	3.4625	5.49667	9.11733	13.3222	14.8843
282	311.8	9.28835	3.47	5.50167	9.1175	13.3107	14.8636
281	311.9	9.27916	3.45667	5.50429	9.11133	13.284	14.848
280	312	9.26968	3.46	5.50875	9.10308	13.2729	14.82
279	312.1	9.25974	3.45333	5.51	9.09222	13.26	14.7857
278	312.2	9.24779	3.44667	5.50429	9.08778	13.2425	14.7667
277	312.3	9.23848	3.432	5.4975	9.08625	13.2236	14.7429
276	312.4	9.22403	3.4175	5.492	9.07	13.1967	14.719
275	312.5	9.20875	3.405	5.48333	9.06	13.1809	14.6925
274	312.6	9.19163	3.395	5.472	9.03571	13.156	14.664
273	312.7	9.1768	3.39286	5.4725	9.02333	13.12	14.636
272	312.8	9.15522	3.375	5.452	8.99875	13.1025	14.6017
271	312.9	9.14114	3.365	5.45	8.99	13.0882	14.57
270	313	9.11859	3.345	5.44	8.968	13.0394	14.5262
269	313.1	9.0981	3.335	5.42714	8.94211	13.0238	14.5
268	313.2	9.07268	3.315	5.412	8.90909	12.9922	14.464
267	313.3	9.05065	3.31083	5.41154	8.89231	12.9486	14.4333
266	313.4	9.02574	3.27833	5.39455	8.8615	12.9254	14.4014
265	313.5	8.99911	3.25929	5.3775	8.83167	12.8867	14.3544
264	313.6	8.97294	3.25667	5.365	8.805	12.8411	14.3112
263	313.7	8.94569	3.24	5.345	8.77857	12.7873	14.2709
262	313.8	8.91965	3.228	5.34	8.75125	12.7575	14.2325
261	313.9	8.89006	3.2225	5.30706	8.719	12.7192	14.19
260	314	8.85812	3.1975	5.28636	8.685	12.6836	14.145
259	314.1	8.82746	3.194	5.264	8.65133	12.6411	14.088
258	314.2	8.79795	3.16833	5.25286	8.615	12.5987	14.0371
257	314.3	8.76617	3.152	5.2375	8.58889	12.56	13.995
256	314.4	8.73175	3.1425	5.21364	8.5375	12.5138	13.9457
255	314.5	8.70391	3.12	5.19444	8.53136	12.4654	13.9067
254	314.6	8.66667	3.104	5.166	8.49667	12.4169	13.86
253	314.7	8.63384	3.06944	5.146	8.466	12.3693	13.8214
252	314.8	8.60202	3.066	5.12125	8.425	12.334	13.7736
251	314.9	8.56728	3.05	5.095	8.39364	12.2739	13.73
250	315	8.5344	3.02882	5.08	8.35286	12.2306	13.6862
249	315.1	8.50018	3.025	5.05208	8.322	12.1829	13.635
248	315.2	8.4687	3.00667	5.01833	8.28455	12.1417	13.588
247	315.3	8.4305	3.006	5.00333	8.257	12.0842	13.5238
246	315.4	8.39451	2.99429	4.9775	8.221	12.0289	13.48
245	315.5	8.36046	2.975	4.95333	8.19429	11.9914	13.4278
244	315.6	8.3269	2.95667	4.93273	8.161	11.9393	13.3812
243	315.7	8.29282	2.945	4.90556	8.11722	11.8925	13.329
242	315.8	8.25871	2.93667	4.88167	8.09	11.838	13.2765
241	315.9	8.22648	2.93	4.84842	8.05182	11.788	13.2378
240	316	8.18917	2.91556	4.82222	8.01467	11.746	13.1928
239	316.1	8.15898	2.90182	4.80471	7.98333	11.7	13.1546
238	316.2	8.12543	2.89143	4.78364	7.95222	11.6633	13.105
237	316.3	8.09213	2.87714	4.75769	7.923	11.6179	13.0537
236	316.4	8.06117	2.86333	4.733	7.88765	11.585	13.0083
235	316.5	8.03127	2.84889	4.71769	7.86778	11.535	12.9611
234	316.6	8.00106	2.844	4.695	7.83429	11.5012	12.91
233	316.7	7.96843	2.82143	4.66333	7.79667	11.4633	12.8688
232	316.8	7.93961	2.81125	4.64545	7.765	11.416	12.8317
231	316.9	7.91233	2.79455	4.62437	7.74333	11.3822	12.78
230	317	7.88391	2.7925	4.59857	7.71571	11.3489	12.7508
229	317.1	7.85624	2.77625	4.58167	7.69429	11.3073	12.7156
228	317.2	7.83012	2.75875	4.55579	7.67667	11.267	12.68
227	317.3	7.80407	2.75778	4.542	7.65222	11.2382	12.6386
226	317.4	7.78251	2.75308	4.52	7.6125	11.1956	12.6057
225	317.5	7.76054	2.75	4.50375	7.585	11.17	12.5756
224	317.6	7.73763	2.7375	4.48583	7.55692	11.1442	12.536
223	317.7	7.71458	2.732	4.46818	7.53375	11.1133	12.5158
222	317.8	7.69657	2.71857	4.44846	7.51348	11.0927	12.4871
221	317.9	7.67798	2.71286	4.436	7.4975	11.071	12.4675
220	318	7.66067	2.698	4.4175	7.48875	11.04	12.4473
219	318.1	7.6449	2.6925	4.40111	7.478	11.0305	12.4267
218	318.2	7.63341	2.6875	4.397	7.46857	11.0117	12.4113
217	318.3	7.61864	2.682	4.37833	7.45778	10.9929	12.39
216	318.4	7.60559	2.67	4.36182	7.45214	10.976	12.3683
215	318.5	7.5968	2.68	4.361	7.442	10.9629	12.3637
214	318.6	7.58712	2.67667	4.34462	7.44231	10.9429	12.36
213	318.7	7.57927	2.67556	4.34231	7.44625	10.9373	12.3557
212	318.8	7.56872	2.67111	4.335	7.43733	10.9271	12.3571
211	318.9	7.56839	2.675	4.33786	7.438	10.92	12.3627
210	319	7.56451	2.683	4.33385	7.44143	10.916	12.3615
209	319.1	7.56436	2.68444	4.3325	7.44714	10.9171	12.3613
208	319.2	7.56665	2.68833	4.3275	7.45	10.9183	12.3655
207	319.3	7.56815	2.68636	4.32143	7.46357	10.9124	12.3664
206	319.4	7.57077	2.69385	4.30846	7.47	10.924	12.3833
205	319.5	7.57469	2.69667	4.3075	7.47615	10.9243	12.3971
204	319.6	7.5829	2.705	4.32143	7.48667	10.9344	12.4117
203	319.7	7.59171	2.71231	4.33	7.49875	10.9385	12.4273
202	319.8	7.60117	2.71571	4.33333	7.508	10.9486	12.4494
201	319.9	7.61448	2.726	4.34211	7.51895	10.9692	12.4744
200	320	7.62708	2.73364	4.3432	7.55	10.9827	12.496
199	320.1	7.64374	2.75176	4.34895	7.57286	11.005	12.5227
198	320.2	7.66338	2.75889	4.36714	7.59476	11.0243	12.5525
197	320.3	7.67997	2.7725	4.37375	7.62286	11.0395	12.5783
196	320.4	7.70101	2.79125	4.37923	7.63722	11.0767	12.6123
195	320.5	7.72404	2.79769	4.39083	7.67	11.1105	12.6556
194	320.6	7.74747	2.82	4.407	7.7	11.1367	12.6917
193	320.7	7.77464	2.838	4.41714	7.73375	11.1764	12.745
192	320.8	7.80329	2.85778	4.435	7.76083	11.1989	12.785
191	320.9	7.83362	2.87889	4.455	7.8028	11.2543	12.84
190	321	7.86771	2.90286	4.48545	7.833	11.3025	12.89
189	321.1	7.90323	2.92571	4.505	7.875	11.35	12.9409
188	321.2	7.93465	2.94417	4.51533	7.90375	11.4023	12.99
187	321.3	7.9737	2.96714	4.545	7.95857	11.4458	13.0325
186	321.4	8.01298	2.99167	4.55556	7.99889	11.5092	13.1083
185	321.5	8.05686	3.00923	4.58273	8.05333	11.5607	13.1733
184	321.6	8.09995	3.0425	4.61571	8.104	11.6159	13.2317
183	321.7	8.14317	3.06333	4.64667	8.15	11.6775	13.28
182	321.8	8.19043	3.094	4.68	8.19333	11.7409	13.355
181	321.9	8.24034	3.125	4.71667	8.24625	11.8108	13.42
180	322	8.28948	3.136	4.73714	8.28533	11.8688	13.5
179	322.1	8.34171	3.16667	4.76625	8.35333	11.9455	13.5667
178	322.2	8.39384	3.2025	4.80545	8.397	12.021	13.6383
177	322.3	8.44999	3.23	4.84467	8.457	12.093	13.716
176	322.4	8.50713	3.258	4.88167	8.52182	12.1643	13.7883
175	322.5	8.56504	3.29455	4.92	8.58	12.2412	13.8825
174	322.6	8.62626	3.33333	4.95727	8.65167	12.315	13.96
173	322.7	8.68628	3.36714	5.00133	8.71333	12.3887	14.05
172	322.8	8.75243	3.39625	5.03667	8.78	12.4755	14.1367
171	322.9	8.81387	3.435	5.07333	8.838	12.5575	14.2186
170	323	8.88208	3.46455	5.12	8.9175	12.6371	14.29
169	323.1	8.95122	3.50056	5.16125	8.985	12.733	14.3867
168	323.2	9.01865	3.52562	5.211	9.055	12.812	14.48
167	323.3	9.08942	3.56312	5.25	9.13667	12.905	14.58
166	323.4	9.16229	3.59667	5.30176	9.22	13.0044	14.6757
165	323.5	9.23586	3.638	5.34937	9.2875	13.0873	14.7731
164	323.6	9.30962	3.67667	5.40438	9.38083	13.1769	14.8664
163	323.7	9.38233	3.715	5.45429	9.46111	13.274	14.97
162	323.8	9.46234	3.75364	5.50375	9.55714	13.3675	15.0667
161	323.9	9.53983	3.79429	5.5575	9.636	13.475	15.1556
160	324	9.62062	3.848	5.62385	9.72429	13.575	15.266
159	324.1	9.70151	3.8925	5.69182	9.81727	13.6811	15.36
158	324.2	9.77813	3.93	5.745	9.888	13.7725	15.447
157	324.3	9.8655	3.97833	5.80267	9.98273	13.8677	15.5537
156	324.4	9.94704	4.01786	5.86429	10.0675	13.9625	15.649
155	324.5	10.0293	4.07714	5.928	10.157	14.0657	15.752
154	324.6	10.1207	4.13143	6.001	10.2436	14.1722	15.844
153	324.7	10.2011	4.17667	6.044	10.332	14.2673	15.9446
152	324.8	10.2914	4.226	6.1	10.42	14.3875	16.0529
151	324.9	10.3796	4.29	6.1875	10.5136	14.4858	16.152
150	325	10.4674	4.34091	6.255	10.6025	14.5989	16.24
149	325.1	10.5555	4.3975	6.308	10.694	14.711	16.348
148	325.2	10.6428	4.44	6.37625	10.79	14.816	16.4617
147	325.3	10.7356	4.50333	6.4525	10.8925	14.9186	16.5656
146	325.4	10.8244	4.55667	6.51412	10.9883	15.0221	16.6733
145	325.5	10.9183	4.61571	6.59182	11.096	15.1333	16.7786
144	325.6	11.0083	4.69	6.67625	11.1862	15.2375	16.887
143	325.7	11.0954	4.736	6.74111	11.2806	15.3462	16.9856
142	325.8	11.1933	4.7975	6.80632	11.37	15.4477	17.094
141	325.9	11.2857	4.84571	6.8875	11.4864	15.5667	17.204
140	326	11.3792	4.9	6.97375	11.59	15.6667	17.3
139	326.1	11.4713	4.958	7.04222	11.6945	15.7793	17.3962
138	326.2	11.564	5.01571	7.115	11.81	15.9007	17.504
137	326.3	11.6577	5.06	7.17857	11.914	16.0171	17.615
136	326.4	11.7507	5.13333	7.25833	12.0215	16.127	17.715
135	326.5	11.84	5.186	7.33429	12.1192	16.2371	17.8167
134	326.6	11.9347	5.24	7.405	12.2433	16.3638	17.9167
133	326.7	12.0287	5.29625	7.483	12.351	16.4622	18.0227
132	326.8	12.1222	5.36833	7.552	12.4422	16.57	18.109
131	326.9	12.2142	5.42875	7.625	12.536	16.67	18.2157
130	327	12.3083	5.49429	7.71667	12.6382	16.778	18.304
129	327.1	12.4032	5.55	7.76938	12.735	16.8856	18.42
128	327.2	12.4925	5.61667	7.85	12.828	16.9827	18.518
127	327.3	12.5858	5.674	7.925	12.9422	17.0756	18.608
126	327.4	12.6755	5.7375	8.01667	13.0295	17.1733	18.71
125	327.5	12.7667	5.80444	8.10125	13.1386	17.2743	18.805
124	327.6	12.8592	5.86	8.18167	13.2457	17.38	18.8984
123	327.7	12.9492	5.92333	8.2575	13.3517	17.4844	19.0111
122	327.8	13.0392	5.974	8.33	13.4438	17.5764	19.1062
121	327.9	13.1267	6.02	8.41857	13.5271	17.6783	19.19
120	328	13.2202	6.09357	8.50667	13.6195	17.7629	19.3125
119	328.1	13.3059	6.15375	8.5875	13.7183	17.8587	19.4171
118	328.2	13.3967	6.20625	8.662	13.8113	17.9571	19.516
117	328.3	13.4787	6.265	8.746	13.87	18.046	19.6057
116	328.4	13.5683	6.33143	8.82143	13.992	18.1412	19.6975
115	328.5	13.6531	6.383	8.90222	14.078	18.2322	19.7886
114	328.6	13.735	6.435	8.98	14.19	18.308	19.8833
113	328.7	13.8194	6.4875	9.058	14.2729	18.3947	19.9657
112	328.8	13.9074	6.555	9.145	14.3694	18.5022	20.068
111	328.9	13.9895	6.5975	9.19714	14.4718	18.592	20.1415
110	329	14.0649	6.66	9.28118	14.5364	18.6855	20.208
109	329.1	14.1481	6.70333	9.34917	14.6333	18.7823	20.2975
108	329.2	14.2319	6.74	9.42	14.7287	18.871	20.3962
107	329.3	14.3082	6.7675	9.49143	14.8254	18.9471	20.48
106	329.4	14.387	6.82	9.56667	14.9136	19.0308	20.555
105	329.5	14.4605	6.84714	9.61125	14.9872	19.12	20.635
104	329.6	14.5301	6.88667	9.69077	15.0682	19.19	20.704
103	329.7	14.605	6.9275	9.74	15.1575	19.2693	20.7775
102	329.8	14.6806	6.97429	9.81429	15.248	19.3487	20.8525
101	329.9	14.75	6.99333	9.86583	15.32	19.4175	20.93
100	330	14.8186	7.03	9.93	15.39	19.5055	20.9883
99	330.1	14.8835	7.0725	9.992	15.47	19.5719	21.05
98	330.2	14.9511	7.11667	10.04	15.538	19.6473	21.11
97	330.3	15.0149	7.138	10.1075	15.6417	19.7215	21.17
96	330.4	15.0775	7.196	10.1571	15.6991	19.794	21.2275
95	330.5	15.1411	7.22333	10.23	15.7792	19.8508	21.29
94	330.6	15.2031	7.26222	10.2825	15.8553	19.9211	21.3294
93	330.7	15.2573	7.29333	10.3386	15.922	19.9841	21.3967
92	330.8	15.3142	7.33	10.395	15.9862	20.0487	21.45
91	330.9	15.3676	7.3825	10.4357	16.045	20.0983	21.5075
90	331	15.426	7.445	10.485	16.108	20.165	21.5383
89	331.1	15.4741	7.48667	10.5257	16.1483	20.2075	21.5967
88	331.2	15.5286	7.55125	10.5756	16.2146	20.2623	21.635
87	331.3	15.5704	7.59333	10.6133	16.2714	20.2986	21.6829
86	331.4	15.617	7.655	10.6686	16.315	20.3546	21.7333
85	331.5	15.6582	7.675	10.6982	16.372	20.3925	21.773
84	331.6	15.7057	7.72667	10.7338	16.421	20.455	21.8429
83	331.7	15.7402	7.766	10.78	16.4457	20.501	21.87
82	331.8	15.7838	7.76778	10.805	16.5025	20.5531	21.918
81	331.9	15.817	7.8	10.8375	16.54	20.5785	21.9514
80	332	15.8515	7.81	10.855	16.5761	20.6294	21.9845
79	332.1	15.8854	7.84	10.8933	16.6171	20.6644	22.025
78	332.2	15.9192	7.88375	10.9233	16.6545	20.6976	22.0582
77	332.3	15.9451	7.91	10.949	16.6955	20.7236	22.1022
76	332.4	15.9694	7.90667	10.992	16.7155	20.74	22.128
75	332.5	15.9946	7.9075	11.0137	16.7529	20.7787	22.1415
74	332.6	16.0205	7.925	11.0333	16.781	20.8033	22.1629
73	332.7	16.036	7.952	11.0367	16.794	20.8206	22.19
72	332.8	16.0545	7.965	11.058	16.8217	20.8258	22.198
71	332.9	16.0778	7.97	11.075	16.8281	20.8573	22.2157
70	333	16.0906	7.97	11.0856	16.8637	20.88	22.2233
69	333.1	16.1048	7.978	11.1071	16.885	20.8938	22.234
68	333.2	16.1165	7.985	11.1118	16.8925	20.9142	22.2364
67	333.3	16.1228	7.9975	11.1143	16.9	20.9136	22.256
66	333.4	16.1326	8.00167	11.1192	16.9178	20.9208	22.2537
65	333.5	16.1399	7.99	11.1444	16.9233	20.9337	22.2575
64	333.6	16.1434	7.97	11.148	16.928	20.9317	22.2377
63	333.7	16.1464	7.97333	11.1529	16.9267	20.9443	22.2518
62	333.8	16.1472	7.97333	11.1533	16.913	20.945	22.2393
61	333.9	16.15	7.97	11.17	16.896	20.95	22.2384
60	334	16.1524	7.96667	11.166	16.8989	20.9533	22.2395
59	334.1	16.1387	7.9625	11.1644	16.8783	20.9413	22.234
58	334.2	16.1399	7.96	11.165	16.8978	20.9415	22.23
57	334.3	16.1363	7.93	11.1575	16.891	20.94	22.2355
56	334.4	16.1298	7.93	11.1391	16.869	20.9278	22.2233
55	334.5	16.1185	7.95	11.1325	16.8414	20.9227	22.21
54	334.6	16.1099	7.92	11.11	16.8263	20.9142	22.205
53	334.7	16.1048	7.915	11.1129	16.8211	20.9109	22.195
52	334.8	16.085	7.92	11.092	16.7914	20.8862	22.181
51	334.9	16.0784	7.90667	11.0933	16.79	20.8688	22.1737
50	335	16.063	7.89	11.0762	16.765	20.8667	22.161
49	335.1	16.042	7.87667	11.0614	16.7271	20.8287	22.1416
48	335.2	16.0297	7.87	11.035	16.702	20.82	22.139
47	335.3	16.008	7.86	11.025	16.6711	20.803	22.116
46	335.4	15.9927	7.84667	11.0218	16.6536	20.7825	22.1
45	335.5	15.9794	7.83333	11.0025	16.6386	20.7813	22.0771
44	335.6	15.9593	7.82	10.9825	16.5989	20.7717	22.068
43	335.7	15.9337	7.805	10.9446	16.5636	20.7356	22.0522
42	335.8	15.9173	7.806	10.9408	16.55	20.7282	22.0367
41	335.9	15.8985	7.80333	10.918	16.5275	20.7122	22.014
40	336	15.8725	7.7675	10.9	16.4888	20.69	21.986
39	336.1	15.8556	7.758	10.8833	16.48	20.681	21.9815
38	336.2	15.8303	7.76	10.8675	16.45	20.6475	21.9543
37	336.3	15.8095	7.74	10.8557	16.4125	20.628	21.932
36	336.4	15.7827	7.71	10.8433	16.385	20.605	21.9125
35	336.5	15.7577	7.71	10.82	16.347	20.5783	21.8833
34	336.6	15.7359	7.7	10.8067	16.319	20.5589	21.8712
33	336.7	15.7173	7.7	10.7871	16.3075	20.537	21.848
32	336.8	15.6875	7.69	10.77	16.2582	20.5043	21.82
31	336.9	15.6723	7.685	10.745	16.2364	20.485	21.7925
30	337	15.641	7.676	10.722	16.21	20.456	21.7609
29	337.1	15.6196	7.665	10.698	16.18	20.438	21.7359
28	337.2	15.5965	7.63625	10.67	16.16	20.4189	21.7086
27	337.3	15.5699	7.62714	10.648	16.1173	20.3914	21.6871
26	337.4	15.5478	7.615	10.6177	16.0786	20.363	21.6714
25	337.5	15.5233	7.584	10.5983	16.066	20.3486	21.6473
24	337.6	15.5023	7.55714	10.5643	16.04	20.3231	21.6333
23	337.7	15.4717	7.545	10.5333	15.9962	20.2911	21.61
22	337.8	15.4566	7.518	10.52	15.981	20.2717	21.6025
21	337.9	15.4312	7.51	10.4867	15.94	20.254	21.58
20	338	15.4027	7.50333	10.47	15.9067	20.2256	21.555
19	338.1	15.3885	7.48	10.4445	15.8858	20.2125	21.5471
18	338.2	15.3661	7.475	10.435	15.861	20.178	21.524
17	338.3	15.344	7.458	10.4033	15.8367	20.147	21.5036
16	338.4	15.3238	7.446	10.39	15.7857	20.1343	21.4817
15	338.5	15.3008	7.42	10.3475	15.7718	20.119	21.4692
14	338.6	15.2798	7.38875	10.3167	15.75	20.1025	21.455
13	338.7	15.2577	7.38	10.2892	15.7287	20.0706	21.4343
12	338.8	15.2404	7.365	10.276	15.6962	20.0687	21.429
11	338.9	15.2192	7.345	10.2487	15.6844	20.0522	21.4
10	339	15.1982	7.34333	10.2338	15.66	20.0229	21.3886
9	339.1	15.1823	7.33667	10.1982	15.6425	20.0271	21.38
8	339.2	15.1665	7.31	10.1857	15.6115	20.0023	21.375
7	339.3	15.1444	7.30143	10.155	15.5938	19.9742	21.368
6	339.4	15.1204	7.28333	10.114	15.5783	19.9583	21.3507
5	339.5	15.1164	7.282	10.1136	15.5717	19.9546	21.347
4	339.6	15.0943	7.26556	10.0714	15.5517	19.935	21.3235
3	339.7	15.0802	7.26111	10.04	15.532	19.92	21.3162
2	339.8	15.0655	7.24429	10.03	15.5261	19.915	21.3056
1	339.9	15.0534	7.238	10.015	15.531	19.8968	21.3025
0	340	15.0313	7.21167	9.986	15.5206	19.89	21.292

## Sheet: strontium
	age	mean	5	16	50	84	95
750	265	0.706802	0.706792	0.706798	0.706804	0.706808	0.706809
749	265.1	0.70681	0.706801	0.706803	0.70681	0.706817	0.706819
748	265.2	0.706818	0.706811	0.706812	0.706816	0.70682	0.706826
747	265.3	0.706826	0.70682	0.706822	0.706825	0.706828	0.70683
746	265.4	0.706833	0.70683	0.706831	0.706835	0.706838	0.706839
745	265.5	0.70684	0.706831	0.706834	0.706842	0.706847	0.706849
744	265.6	0.706847	0.706841	0.706842	0.706845	0.706849	0.706852
743	265.7	0.706854	0.70685	0.706852	0.706855	0.706858	0.70686
742	265.8	0.706861	0.706852	0.706858	0.706864	0.706868	0.706869
741	265.9	0.706868	0.706861	0.706862	0.706865	0.706869	0.70687
740	266	0.706874	0.70687	0.706872	0.706875	0.706878	0.706879
739	266.1	0.70688	0.706871	0.706873	0.70688	0.706887	0.706889
738	266.2	0.706886	0.706881	0.706882	0.706885	0.706888	0.70689
737	266.3	0.706892	0.706885	0.706891	0.706894	0.706898	0.706899
736	266.4	0.706897	0.706891	0.706892	0.706895	0.706898	0.7069
735	266.5	0.706903	0.7069	0.706901	0.706905	0.706908	0.706909
734	266.6	0.706908	0.706901	0.706902	0.706905	0.706909	0.70691
733	266.7	0.706913	0.70691	0.706911	0.706915	0.706918	0.706919
732	266.8	0.706917	0.706911	0.706912	0.706915	0.706919	0.70692
731	266.9	0.706922	0.706919	0.706921	0.706925	0.706928	0.706929
730	267	0.706926	0.706921	0.706922	0.706925	0.706928	0.70693
729	267.1	0.706931	0.706922	0.706925	0.706933	0.706938	0.706939
728	267.2	0.706935	0.70693	0.706932	0.706935	0.706938	0.706939
727	267.3	0.706938	0.706931	0.706932	0.706935	0.706939	0.706944
726	267.4	0.706942	0.70694	0.706941	0.706945	0.706948	0.706949
725	267.5	0.706946	0.70694	0.706942	0.706945	0.706948	0.706949
724	267.6	0.706949	0.706941	0.706942	0.706946	0.706952	0.706957
723	267.7	0.706952	0.70695	0.706951	0.706955	0.706958	0.706959
722	267.8	0.706955	0.70695	0.706952	0.706955	0.706958	0.706959
721	267.9	0.706958	0.706951	0.706952	0.706955	0.706959	0.706962
720	268	0.706961	0.706952	0.706956	0.706963	0.706968	0.706969
719	268.1	0.706963	0.70696	0.706962	0.706965	0.706968	0.706969
718	268.2	0.706966	0.70696	0.706962	0.706965	0.706968	0.706969
717	268.3	0.706968	0.706961	0.706962	0.706965	0.706969	0.706972
716	268.4	0.70697	0.706961	0.706964	0.706971	0.706977	0.706979
715	268.5	0.706972	0.70697	0.706971	0.706975	0.706978	0.706979
714	268.6	0.706974	0.70697	0.706972	0.706975	0.706978	0.706979
713	268.7	0.706976	0.70697	0.706972	0.706975	0.706978	0.706979
712	268.8	0.706977	0.706971	0.706972	0.706975	0.706979	0.70698
711	268.9	0.706979	0.706971	0.706972	0.706976	0.70698	0.706987
710	269	0.70698	0.706971	0.706973	0.706981	0.706987	0.706989
709	269.1	0.706981	0.706973	0.70698	0.706984	0.706988	0.706989
708	269.2	0.706982	0.70698	0.706981	0.706985	0.706988	0.706989
707	269.3	0.706983	0.70698	0.706982	0.706985	0.706988	0.706989
706	269.4	0.706984	0.70698	0.706982	0.706985	0.706988	0.706989
705	269.5	0.706985	0.70698	0.706982	0.706985	0.706988	0.706989
704	269.6	0.706986	0.70698	0.706982	0.706985	0.706988	0.706989
703	269.7	0.706986	0.706981	0.706982	0.706985	0.706988	0.70699
702	269.8	0.706987	0.706981	0.706982	0.706985	0.706988	0.70699
701	269.9	0.706987	0.706981	0.706982	0.706985	0.706988	0.70699
700	270	0.706988	0.706981	0.706982	0.706985	0.706989	0.70699
699	270.1	0.706988	0.706981	0.706982	0.706985	0.706989	0.70699
698	270.2	0.706988	0.706981	0.706982	0.706985	0.706989	0.70699
697	270.3	0.706988	0.706981	0.706982	0.706985	0.706989	0.706992
696	270.4	0.706988	0.706981	0.706982	0.706985	0.706989	0.706992
695	270.5	0.706988	0.706981	0.706982	0.706985	0.706989	0.706992
694	270.6	0.706988	0.706981	0.706982	0.706985	0.706989	0.70699
693	270.7	0.706988	0.706981	0.706982	0.706985	0.706989	0.70699
692	270.8	0.706987	0.706981	0.706982	0.706985	0.706989	0.70699
691	270.9	0.706987	0.706981	0.706982	0.706985	0.706988	0.70699
690	271	0.706987	0.706981	0.706982	0.706985	0.706988	0.70699
689	271.1	0.706986	0.706981	0.706982	0.706985	0.706988	0.70699
688	271.2	0.706986	0.70698	0.706982	0.706985	0.706988	0.706989
687	271.3	0.706986	0.70698	0.706982	0.706985	0.706988	0.706989
686	271.4	0.706985	0.70698	0.706982	0.706985	0.706988	0.706989
685	271.5	0.706985	0.70698	0.706982	0.706985	0.706988	0.706989
684	271.6	0.706984	0.70698	0.706982	0.706985	0.706988	0.706989
683	271.7	0.706983	0.70698	0.706982	0.706985	0.706988	0.706989
682	271.8	0.706983	0.70698	0.706982	0.706985	0.706988	0.706989
681	271.9	0.706982	0.70698	0.706981	0.706985	0.706988	0.706989
680	272	0.706982	0.706975	0.706981	0.706984	0.706988	0.706989
679	272.1	0.706981	0.706972	0.706978	0.706984	0.706988	0.706989
678	272.2	0.70698	0.706971	0.706974	0.706982	0.706987	0.706989
677	272.3	0.70698	0.706971	0.706973	0.706979	0.706986	0.706989
676	272.4	0.706979	0.706971	0.706972	0.706977	0.706984	0.706988
675	272.5	0.706979	0.706971	0.706972	0.706976	0.70698	0.706986
674	272.6	0.706978	0.706971	0.706972	0.706975	0.706979	0.706982
673	272.7	0.706977	0.706971	0.706972	0.706975	0.706979	0.70698
672	272.8	0.706977	0.706971	0.706972	0.706975	0.706978	0.70698
671	272.9	0.706976	0.70697	0.706972	0.706975	0.706978	0.706979
670	273	0.706976	0.70697	0.706972	0.706975	0.706978	0.706979
669	273.1	0.706975	0.70697	0.706972	0.706975	0.706978	0.706979
668	273.2	0.706975	0.70697	0.706972	0.706975	0.706978	0.706979
667	273.3	0.706974	0.70697	0.706972	0.706975	0.706978	0.706979
666	273.4	0.706974	0.70697	0.706972	0.706975	0.706978	0.706979
665	273.5	0.706973	0.70697	0.706972	0.706975	0.706978	0.706979
664	273.6	0.706973	0.70697	0.706972	0.706975	0.706978	0.706979
663	273.7	0.706973	0.70697	0.706971	0.706975	0.706978	0.706979
662	273.8	0.706972	0.70697	0.706971	0.706975	0.706978	0.706979
661	273.9	0.706972	0.706967	0.706971	0.706975	0.706978	0.706979
660	274	0.706972	0.706965	0.706971	0.706974	0.706978	0.706979
659	274.1	0.706972	0.706964	0.70697	0.706974	0.706978	0.706979
658	274.2	0.706971	0.706964	0.70697	0.706974	0.706978	0.706979
657	274.3	0.706971	0.706963	0.70697	0.706974	0.706978	0.706979
656	274.4	0.706971	0.706963	0.70697	0.706974	0.706978	0.706979
655	274.5	0.706971	0.706963	0.70697	0.706974	0.706978	0.706979
654	274.6	0.706971	0.706963	0.70697	0.706974	0.706978	0.706979
653	274.7	0.706972	0.706964	0.70697	0.706974	0.706978	0.706979
652	274.8	0.706972	0.706965	0.706971	0.706974	0.706978	0.706979
651	274.9	0.706972	0.706967	0.706971	0.706975	0.706978	0.706979
650	275	0.706972	0.70697	0.706971	0.706975	0.706978	0.706979
649	275.1	0.706973	0.70697	0.706971	0.706975	0.706978	0.706979
648	275.2	0.706973	0.70697	0.706972	0.706975	0.706978	0.706979
647	275.3	0.706974	0.70697	0.706972	0.706975	0.706978	0.706979
646	275.4	0.706974	0.70697	0.706972	0.706975	0.706978	0.706979
645	275.5	0.706975	0.70697	0.706972	0.706975	0.706978	0.706979
644	275.6	0.706975	0.70697	0.706972	0.706975	0.706978	0.706979
643	275.7	0.706976	0.706971	0.706972	0.706975	0.706978	0.70698
642	275.8	0.706977	0.706971	0.706972	0.706975	0.706979	0.70698
641	275.9	0.706978	0.706971	0.706972	0.706975	0.706979	0.706982
640	276	0.706979	0.706971	0.706972	0.706976	0.706983	0.706988
639	276.1	0.70698	0.706971	0.706973	0.706979	0.706987	0.706989
638	276.2	0.706981	0.706972	0.706976	0.706983	0.706988	0.706989
637	276.3	0.706982	0.706978	0.706981	0.706985	0.706988	0.706989
636	276.4	0.706983	0.70698	0.706982	0.706985	0.706988	0.706989
635	276.5	0.706984	0.70698	0.706982	0.706985	0.706988	0.706989
634	276.6	0.706986	0.706981	0.706982	0.706985	0.706988	0.70699
633	276.7	0.706987	0.706981	0.706982	0.706985	0.706989	0.70699
632	276.8	0.706989	0.706981	0.706982	0.706986	0.706991	0.706997
631	276.9	0.70699	0.706981	0.706984	0.706991	0.706997	0.706999
630	277	0.706992	0.706985	0.706991	0.706994	0.706998	0.706999
629	277.1	0.706993	0.70699	0.706992	0.706995	0.706998	0.706999
628	277.2	0.706995	0.70699	0.706992	0.706995	0.706998	0.706999
627	277.3	0.706997	0.706991	0.706992	0.706995	0.706998	0.707
626	277.4	0.706999	0.706991	0.706992	0.706996	0.707001	0.707007
625	277.5	0.707001	0.706992	0.706995	0.707003	0.707008	0.707009
624	277.6	0.707003	0.707	0.707001	0.707005	0.707008	0.707009
623	277.7	0.707005	0.707	0.707002	0.707005	0.707008	0.707009
622	277.8	0.707007	0.707001	0.707002	0.707005	0.707008	0.70701
621	277.9	0.707009	0.707001	0.707002	0.707006	0.707011	0.707017
620	278	0.707011	0.707002	0.707007	0.707013	0.707018	0.707019
619	278.1	0.707013	0.70701	0.707012	0.707015	0.707018	0.707019
618	278.2	0.707015	0.70701	0.707012	0.707015	0.707018	0.707019
617	278.3	0.707018	0.707011	0.707012	0.707015	0.707019	0.70702
616	278.4	0.70702	0.707011	0.707013	0.707021	0.707027	0.707029
615	278.5	0.707022	0.70702	0.707021	0.707025	0.707028	0.707029
614	278.6	0.707025	0.70702	0.707022	0.707025	0.707028	0.707029
613	278.7	0.707027	0.707021	0.707022	0.707025	0.707029	0.70703
612	278.8	0.70703	0.707021	0.707023	0.70703	0.707037	0.707039
611	278.9	0.707033	0.70703	0.707031	0.707035	0.707038	0.707039
610	279	0.707035	0.70703	0.707032	0.707035	0.707038	0.707039
609	279.1	0.707038	0.707031	0.707032	0.707035	0.707039	0.707041
608	279.2	0.70704	0.707031	0.707035	0.707042	0.707048	0.707049
607	279.3	0.707043	0.70704	0.707042	0.707045	0.707048	0.707049
606	279.4	0.707046	0.70704	0.707042	0.707045	0.707048	0.707049
605	279.5	0.707049	0.707041	0.707042	0.707046	0.707052	0.707057
604	279.6	0.707052	0.707044	0.707051	0.707054	0.707058	0.707059
603	279.7	0.707054	0.70705	0.707052	0.707055	0.707058	0.707059
602	279.8	0.707057	0.707051	0.707052	0.707055	0.707059	0.70706
601	279.9	0.70706	0.707051	0.707054	0.707061	0.707067	0.707069
600	280	0.707063	0.70706	0.707062	0.707065	0.707068	0.707069
599	280.1	0.707066	0.70706	0.707062	0.707065	0.707068	0.707069
598	280.2	0.707069	0.707061	0.707062	0.707066	0.707073	0.707078
597	280.3	0.707072	0.707066	0.707071	0.707075	0.707078	0.707079
596	280.4	0.707075	0.70707	0.707072	0.707075	0.707078	0.707079
595	280.5	0.707078	0.707071	0.707072	0.707075	0.707079	0.707083
594	280.6	0.707081	0.707072	0.707076	0.707083	0.707088	0.707089
593	280.7	0.707084	0.70708	0.707082	0.707085	0.707088	0.707089
592	280.8	0.707087	0.707081	0.707082	0.707085	0.707089	0.70709
591	280.9	0.70709	0.707081	0.707083	0.707089	0.707096	0.707099
590	281	0.707093	0.70709	0.707091	0.707095	0.707098	0.707099
589	281.1	0.707096	0.707091	0.707092	0.707095	0.707098	0.7071
588	281.2	0.707099	0.707091	0.707092	0.707097	0.707103	0.707108
587	281.3	0.707102	0.707095	0.707101	0.707104	0.707108	0.707109
586	281.4	0.707105	0.7071	0.707102	0.707105	0.707108	0.707109
585	281.5	0.707108	0.707101	0.707102	0.707106	0.707109	0.707116
584	281.6	0.707111	0.707102	0.707107	0.707113	0.707118	0.707119
583	281.7	0.707114	0.70711	0.707112	0.707115	0.707118	0.707119
582	281.8	0.707117	0.707111	0.707112	0.707115	0.707119	0.70712
581	281.9	0.70712	0.707111	0.707113	0.70712	0.707127	0.707129
580	282	0.707123	0.70712	0.707121	0.707125	0.707128	0.707129
579	282.1	0.707126	0.707121	0.707122	0.707125	0.707128	0.70713
578	282.2	0.707129	0.707121	0.707122	0.707127	0.707135	0.707138
577	282.3	0.707132	0.707124	0.707131	0.707134	0.707138	0.707139
576	282.4	0.707135	0.707131	0.707132	0.707135	0.707138	0.70714
575	282.5	0.707138	0.707131	0.707132	0.707136	0.70714	0.707146
574	282.6	0.707141	0.707132	0.707136	0.707143	0.707148	0.707149
573	282.7	0.707144	0.70714	0.707142	0.707145	0.707148	0.707149
572	282.8	0.707147	0.707141	0.707142	0.707145	0.707149	0.707151
571	282.9	0.70715	0.707141	0.707143	0.707149	0.707157	0.707159
570	283	0.707153	0.707147	0.707151	0.707155	0.707158	0.707159
569	283.1	0.707156	0.707151	0.707152	0.707155	0.707158	0.70716
568	283.2	0.707159	0.707151	0.707152	0.707156	0.707163	0.707168
567	283.3	0.707161	0.707152	0.707158	0.707164	0.707168	0.707169
566	283.4	0.707164	0.70716	0.707162	0.707165	0.707168	0.707169
565	283.5	0.707167	0.707161	0.707162	0.707165	0.707169	0.707173
564	283.6	0.70717	0.707161	0.707163	0.70717	0.707177	0.707179
563	283.7	0.707173	0.707166	0.707171	0.707175	0.707178	0.707179
562	283.8	0.707176	0.70717	0.707172	0.707175	0.707179	0.70718
561	283.9	0.707179	0.707171	0.707172	0.707176	0.707183	0.707188
560	284	0.707181	0.707172	0.707177	0.707183	0.707188	0.707189
559	284.1	0.707184	0.70718	0.707181	0.707185	0.707188	0.707189
558	284.2	0.707187	0.707181	0.707182	0.707185	0.707189	0.707193
557	284.3	0.70719	0.707181	0.707183	0.707189	0.707196	0.707199
556	284.4	0.707193	0.707185	0.707191	0.707194	0.707198	0.707199
555	284.5	0.707195	0.70719	0.707192	0.707195	0.707198	0.7072
554	284.6	0.707198	0.707191	0.707192	0.707196	0.707201	0.707207
553	284.7	0.707201	0.707192	0.707195	0.707203	0.707208	0.707209
552	284.8	0.707204	0.7072	0.707201	0.707205	0.707208	0.707209
551	284.9	0.707206	0.707201	0.707202	0.707205	0.707209	0.70721
550	285	0.707209	0.707201	0.707202	0.707208	0.707215	0.707219
549	285.1	0.707212	0.707203	0.70721	0.707214	0.707218	0.707219
548	285.2	0.707215	0.70721	0.707212	0.707215	0.707218	0.70722
547	285.3	0.707218	0.707211	0.707212	0.707216	0.70722	0.707226
546	285.4	0.70722	0.707211	0.707214	0.707221	0.707227	0.707229
545	285.5	0.707223	0.707218	0.707221	0.707225	0.707228	0.707229
544	285.6	0.707226	0.707221	0.707222	0.707225	0.707229	0.70723
543	285.7	0.707229	0.707221	0.707222	0.707227	0.707234	0.707238
542	285.8	0.707232	0.707223	0.707228	0.707234	0.707238	0.707239
541	285.9	0.707235	0.70723	0.707232	0.707235	0.707238	0.70724
540	286	0.707237	0.707231	0.707232	0.707236	0.707239	0.707245
539	286.1	0.70724	0.707231	0.707234	0.707241	0.707247	0.707249
538	286.2	0.707243	0.70724	0.707241	0.707245	0.707248	0.707249
537	286.3	0.707246	0.707241	0.707242	0.707245	0.707249	0.70725
536	286.4	0.707249	0.707241	0.707242	0.707247	0.707255	0.707258
535	286.5	0.707252	0.707245	0.707251	0.707254	0.707258	0.707259
534	286.6	0.707255	0.70725	0.707252	0.707255	0.707258	0.70726
533	286.7	0.707258	0.707251	0.707252	0.707256	0.707261	0.707267
532	286.8	0.707261	0.707252	0.707257	0.707264	0.707268	0.707269
531	286.9	0.707265	0.70726	0.707262	0.707265	0.707268	0.70727
530	287	0.707268	0.707261	0.707262	0.707266	0.707269	0.707275
529	287.1	0.707271	0.707262	0.707266	0.707273	0.707278	0.707279
528	287.2	0.707274	0.70727	0.707272	0.707275	0.707278	0.70728
527	287.3	0.707278	0.707271	0.707272	0.707275	0.707279	0.707283
526	287.4	0.707281	0.707272	0.707276	0.707283	0.707288	0.707289
525	287.5	0.707284	0.70728	0.707282	0.707285	0.707288	0.70729
524	287.6	0.707288	0.707281	0.707282	0.707285	0.707289	0.707294
523	287.7	0.707291	0.707282	0.707288	0.707294	0.707298	0.707299
522	287.8	0.707295	0.70729	0.707292	0.707295	0.707298	0.7073
521	287.9	0.707299	0.707291	0.707292	0.707296	0.707301	0.707307
520	288	0.707302	0.707297	0.707301	0.707305	0.707308	0.707309
519	288.1	0.707306	0.707301	0.707302	0.707305	0.707308	0.70731
518	288.2	0.70731	0.707301	0.707303	0.707309	0.707316	0.707319
517	288.3	0.707314	0.70731	0.707312	0.707315	0.707318	0.707319
516	288.4	0.707318	0.707311	0.707312	0.707315	0.707319	0.70732
515	288.5	0.707322	0.707315	0.707321	0.707324	0.707328	0.707329
514	288.6	0.707326	0.707321	0.707322	0.707325	0.707328	0.70733
513	288.7	0.70733	0.707321	0.707323	0.70733	0.707337	0.707339
512	288.8	0.707334	0.70733	0.707332	0.707335	0.707338	0.707339
511	288.9	0.707339	0.707331	0.707332	0.707336	0.70734	0.707346
510	289	0.707343	0.70734	0.707342	0.707345	0.707348	0.707349
509	289.1	0.707347	0.707341	0.707342	0.707345	0.707349	0.70735
508	289.2	0.707352	0.70735	0.707351	0.707355	0.707358	0.707359
507	289.3	0.707357	0.707351	0.707352	0.707355	0.707358	0.70736
506	289.4	0.707361	0.707357	0.707361	0.707365	0.707368	0.707369
505	289.5	0.707366	0.70736	0.707362	0.707365	0.707368	0.707369
504	289.6	0.707371	0.707365	0.707371	0.707374	0.707378	0.707379
503	289.7	0.707376	0.70737	0.707372	0.707375	0.707378	0.707379
502	289.8	0.707381	0.707378	0.707381	0.707385	0.707388	0.707389
501	289.9	0.707387	0.70738	0.707382	0.707385	0.707388	0.707389
500	290	0.707392	0.70739	0.707391	0.707395	0.707398	0.707399
499	290.1	0.707397	0.70739	0.707392	0.707395	0.707398	0.707399
498	290.2	0.707403	0.7074	0.707402	0.707405	0.707408	0.707409
497	290.3	0.707408	0.707401	0.707402	0.707405	0.707408	0.70741
496	290.4	0.707414	0.70741	0.707412	0.707415	0.707418	0.707419
495	290.5	0.70742	0.707411	0.707412	0.707417	0.707424	0.707428
494	290.6	0.707426	0.70742	0.707422	0.707425	0.707428	0.707429
493	290.7	0.707431	0.70743	0.707432	0.707435	0.707438	0.707439
492	290.8	0.707438	0.70743	0.707432	0.707435	0.707438	0.707439
491	290.9	0.707444	0.70744	0.707442	0.707445	0.707448	0.707449
490	291	0.70745	0.707441	0.707443	0.707448	0.707456	0.707459
489	291.1	0.707456	0.70745	0.707452	0.707455	0.707458	0.707459
488	291.2	0.707463	0.70746	0.707462	0.707465	0.707468	0.707469
487	291.3	0.707469	0.707461	0.707462	0.707465	0.707468	0.70747
486	291.4	0.707476	0.70747	0.707472	0.707475	0.707478	0.707479
485	291.5	0.707483	0.70748	0.707482	0.707485	0.707488	0.707489
484	291.6	0.707489	0.70748	0.707482	0.707485	0.707488	0.707489
483	291.7	0.707496	0.70749	0.707492	0.707495	0.707498	0.707499
482	291.8	0.707503	0.7075	0.707502	0.707505	0.707508	0.707509
481	291.9	0.70751	0.70751	0.707512	0.707515	0.707518	0.707519
480	292	0.707518	0.70751	0.707512	0.707515	0.707518	0.707519
479	292.1	0.707525	0.70752	0.707522	0.707525	0.707528	0.707529
478	292.2	0.707532	0.70753	0.707532	0.707535	0.707538	0.707539
477	292.3	0.70754	0.707531	0.707532	0.707535	0.707539	0.70754
476	292.4	0.707547	0.70754	0.707542	0.707545	0.707548	0.707549
475	292.5	0.707555	0.70755	0.707552	0.707555	0.707558	0.707559
474	292.6	0.707562	0.70756	0.707562	0.707565	0.707568	0.707569
473	292.7	0.70757	0.707562	0.707565	0.707573	0.707578	0.707579
472	292.8	0.707578	0.70757	0.707572	0.707575	0.707578	0.707579
471	292.9	0.707586	0.70758	0.707582	0.707585	0.707588	0.707589
470	293	0.707594	0.70759	0.707592	0.707595	0.707598	0.707599
469	293.1	0.707602	0.7076	0.707602	0.707605	0.707608	0.707609
468	293.2	0.70761	0.707601	0.707604	0.707611	0.707617	0.707619
467	293.3	0.707618	0.707611	0.707612	0.707615	0.707618	0.70762
466	293.4	0.707626	0.70762	0.707622	0.707625	0.707628	0.707629
465	293.5	0.707635	0.70763	0.707632	0.707635	0.707638	0.707639
464	293.6	0.707643	0.70764	0.707642	0.707645	0.707648	0.707649
463	293.7	0.707652	0.70765	0.707652	0.707655	0.707658	0.707659
462	293.8	0.70766	0.707651	0.707653	0.70766	0.707667	0.707669
461	293.9	0.707669	0.707661	0.707662	0.707665	0.707669	0.70767
460	294	0.707677	0.70767	0.707672	0.707675	0.707678	0.707679
459	294.1	0.707686	0.70768	0.707682	0.707685	0.707688	0.707689
458	294.2	0.707694	0.70769	0.707692	0.707695	0.707698	0.707699
457	294.3	0.707703	0.7077	0.707702	0.707705	0.707708	0.707709
456	294.4	0.707712	0.70771	0.707711	0.707715	0.707718	0.707719
455	294.5	0.70772	0.707712	0.707715	0.707723	0.707728	0.707729
454	294.6	0.707729	0.707721	0.707722	0.707726	0.707731	0.707737
453	294.7	0.707738	0.707731	0.707732	0.707735	0.707739	0.70774
452	294.8	0.707747	0.707741	0.707742	0.707745	0.707748	0.70775
451	294.9	0.707756	0.70775	0.707752	0.707755	0.707758	0.707759
450	295	0.707764	0.70776	0.707762	0.707765	0.707768	0.707769
449	295.1	0.707773	0.70777	0.707772	0.707775	0.707778	0.707779
448	295.2	0.707782	0.70778	0.707781	0.707785	0.707788	0.707789
447	295.3	0.707791	0.707782	0.707787	0.707794	0.707798	0.707799
446	295.4	0.7078	0.707791	0.707793	0.707799	0.707806	0.707809
445	295.5	0.707809	0.707801	0.707802	0.707806	0.707809	0.707815
444	295.6	0.707817	0.707811	0.707812	0.707815	0.707818	0.70782
443	295.7	0.707826	0.707821	0.707822	0.707825	0.707828	0.70783
442	295.8	0.707835	0.70783	0.707832	0.707835	0.707838	0.707839
441	295.9	0.707844	0.70784	0.707842	0.707845	0.707848	0.707849
440	296	0.707852	0.70785	0.707851	0.707855	0.707858	0.707859
439	296.1	0.707861	0.707853	0.707859	0.707864	0.707868	0.707869
438	296.2	0.70787	0.707861	0.707863	0.707869	0.707876	0.707879
437	296.3	0.707878	0.707871	0.707872	0.707876	0.707879	0.707885
436	296.4	0.707887	0.707881	0.707882	0.707885	0.707888	0.70789
435	296.5	0.707896	0.70789	0.707892	0.707895	0.707898	0.707899
434	296.6	0.707904	0.7079	0.707902	0.707905	0.707908	0.707909
433	296.7	0.707912	0.70791	0.707911	0.707915	0.707918	0.707919
432	296.8	0.707921	0.707912	0.707916	0.707923	0.707928	0.707929
431	296.9	0.707929	0.707921	0.707922	0.707927	0.707934	0.707938
430	297	0.707937	0.707931	0.707932	0.707935	0.707939	0.70794
429	297.1	0.707946	0.70794	0.707942	0.707945	0.707948	0.707949
428	297.2	0.707954	0.70795	0.707952	0.707955	0.707958	0.707959
427	297.3	0.707962	0.707959	0.707961	0.707965	0.707968	0.707969
426	297.4	0.70797	0.707961	0.707963	0.707969	0.707977	0.707979
425	297.5	0.707978	0.707971	0.707972	0.707975	0.707979	0.70798
424	297.6	0.707986	0.70798	0.707982	0.707985	0.707988	0.707989
423	297.7	0.707993	0.70799	0.707992	0.707995	0.707998	0.707999
422	297.8	0.708001	0.707992	0.707998	0.708004	0.708008	0.708009
421	297.9	0.708009	0.708001	0.708002	0.708006	0.70801	0.708016
420	298	0.708016	0.70801	0.708012	0.708015	0.708018	0.708019
419	298.1	0.708023	0.70802	0.708022	0.708025	0.708028	0.708029
418	298.2	0.708031	0.708022	0.708026	0.708033	0.708038	0.708039
417	298.3	0.708038	0.708031	0.708032	0.708035	0.708039	0.70804
416	298.4	0.708045	0.70804	0.708042	0.708045	0.708048	0.708049
415	298.5	0.708052	0.70805	0.708051	0.708055	0.708058	0.708059
414	298.6	0.708059	0.708051	0.708052	0.708056	0.70806	0.708067
413	298.7	0.708066	0.70806	0.708062	0.708065	0.708068	0.708069
412	298.8	0.708072	0.70807	0.708071	0.708075	0.708078	0.708079
411	298.9	0.708079	0.708071	0.708072	0.708076	0.70808	0.708086
410	299	0.708085	0.70808	0.708082	0.708085	0.708088	0.708089
409	299.1	0.708092	0.708089	0.708091	0.708095	0.708098	0.708099
408	299.2	0.708098	0.708091	0.708092	0.708095	0.708098	0.7081
407	299.3	0.708104	0.7081	0.708102	0.708105	0.708108	0.708109
406	299.4	0.70811	0.708101	0.708103	0.708108	0.708116	0.708119
405	299.5	0.708116	0.70811	0.708112	0.708115	0.708118	0.708119
404	299.6	0.708121	0.708116	0.708121	0.708125	0.708128	0.708129
403	299.7	0.708127	0.70812	0.708122	0.708125	0.708128	0.708129
402	299.8	0.708132	0.70813	0.708132	0.708135	0.708138	0.708139
401	299.9	0.708138	0.708131	0.708132	0.708135	0.708138	0.70814
400	300	0.708143	0.70814	0.708142	0.708145	0.708148	0.708149
399	300.1	0.708148	0.708141	0.708142	0.708145	0.708148	0.70815
398	300.2	0.708153	0.70815	0.708152	0.708155	0.708158	0.708159
397	300.3	0.708158	0.708151	0.708152	0.708155	0.708158	0.70816
396	300.4	0.708162	0.70816	0.708162	0.708165	0.708168	0.708169
395	300.5	0.708167	0.70816	0.708162	0.708165	0.708168	0.708169
394	300.6	0.708171	0.70817	0.708171	0.708175	0.708178	0.708179
393	300.7	0.708176	0.70817	0.708172	0.708175	0.708178	0.708179
392	300.8	0.70818	0.708171	0.708173	0.708179	0.708186	0.708189
391	300.9	0.708184	0.70818	0.708182	0.708185	0.708188	0.708189
390	301	0.708188	0.708181	0.708182	0.708185	0.708188	0.70819
389	301.1	0.708192	0.70819	0.708192	0.708195	0.708198	0.708199
388	301.2	0.708195	0.70819	0.708192	0.708195	0.708198	0.708199
387	301.3	0.708199	0.708191	0.708192	0.708195	0.708199	0.7082
386	301.4	0.708202	0.7082	0.708202	0.708205	0.708208	0.708209
385	301.5	0.708206	0.7082	0.708202	0.708205	0.708208	0.708209
384	301.6	0.708209	0.708201	0.708202	0.708205	0.708208	0.70821
383	301.7	0.708212	0.70821	0.708212	0.708215	0.708218	0.708219
382	301.8	0.708215	0.70821	0.708212	0.708215	0.708218	0.708219
381	301.9	0.708218	0.70821	0.708212	0.708215	0.708218	0.708219
380	302	0.70822	0.708214	0.70822	0.708224	0.708228	0.708229
379	302.1	0.708223	0.70822	0.708222	0.708225	0.708228	0.708229
378	302.2	0.708226	0.70822	0.708222	0.708225	0.708228	0.708229
377	302.3	0.708228	0.70822	0.708222	0.708225	0.708228	0.708229
376	302.4	0.70823	0.708222	0.708228	0.708234	0.708238	0.708239
375	302.5	0.708232	0.70823	0.708232	0.708235	0.708238	0.708239
374	302.6	0.708235	0.70823	0.708232	0.708235	0.708238	0.708239
373	302.7	0.708237	0.70823	0.708232	0.708235	0.708238	0.708239
372	302.8	0.708238	0.70823	0.708232	0.708235	0.708238	0.708239
371	302.9	0.70824	0.708233	0.708238	0.708244	0.708248	0.708249
370	303	0.708242	0.70824	0.708242	0.708245	0.708248	0.708249
369	303.1	0.708243	0.70824	0.708242	0.708245	0.708248	0.708249
368	303.2	0.708245	0.70824	0.708242	0.708245	0.708248	0.708249
367	303.3	0.708246	0.70824	0.708242	0.708245	0.708248	0.708249
366	303.4	0.708248	0.70824	0.708242	0.708245	0.708248	0.708249
365	303.5	0.708249	0.70824	0.708242	0.708245	0.708248	0.708249
364	303.6	0.70825	0.70825	0.708252	0.708255	0.708258	0.708259
363	303.7	0.708251	0.70825	0.708252	0.708255	0.708258	0.708259
362	303.8	0.708252	0.70825	0.708252	0.708255	0.708258	0.708259
361	303.9	0.708253	0.70825	0.708252	0.708255	0.708258	0.708259
360	304	0.708254	0.70825	0.708252	0.708255	0.708258	0.708259
359	304.1	0.708255	0.70825	0.708252	0.708255	0.708258	0.708259
358	304.2	0.708256	0.70825	0.708252	0.708255	0.708258	0.708259
357	304.3	0.708257	0.70825	0.708252	0.708255	0.708258	0.708259
356	304.4	0.708257	0.70825	0.708252	0.708255	0.708258	0.708259
355	304.5	0.708258	0.70825	0.708252	0.708255	0.708258	0.708259
354	304.6	0.708258	0.70825	0.708252	0.708255	0.708258	0.708259
353	304.7	0.708259	0.70825	0.708252	0.708255	0.708258	0.708259
352	304.8	0.708259	0.70825	0.708252	0.708255	0.708258	0.708259
351	304.9	0.70826	0.708251	0.708252	0.708255	0.708258	0.70826
350	305	0.70826	0.70826	0.708261	0.708265	0.708268	0.708269
349	305.1	0.708261	0.70826	0.708262	0.708265	0.708268	0.708269
348	305.2	0.708261	0.70826	0.708262	0.708265	0.708268	0.708269
347	305.3	0.708261	0.70826	0.708262	0.708265	0.708268	0.708269
346	305.4	0.708261	0.70826	0.708262	0.708265	0.708268	0.708269
345	305.5	0.708262	0.70826	0.708262	0.708265	0.708268	0.708269
344	305.6	0.708262	0.70826	0.708262	0.708265	0.708268	0.708269
343	305.7	0.708262	0.70826	0.708262	0.708265	0.708268	0.708269
342	305.8	0.708262	0.70826	0.708262	0.708265	0.708268	0.708269
341	305.9	0.708263	0.70826	0.708262	0.708265	0.708268	0.708269
340	306	0.708263	0.70826	0.708262	0.708265	0.708268	0.708269
339	306.1	0.708263	0.70826	0.708262	0.708265	0.708268	0.708269
338	306.2	0.708263	0.70826	0.708262	0.708265	0.708268	0.708269
337	306.3	0.708263	0.70826	0.708262	0.708265	0.708268	0.708269
336	306.4	0.708263	0.70826	0.708262	0.708265	0.708268	0.708269
335	306.5	0.708264	0.70826	0.708262	0.708265	0.708268	0.708269
334	306.6	0.708264	0.70826	0.708262	0.708265	0.708268	0.708269
333	306.7	0.708264	0.70826	0.708262	0.708265	0.708268	0.708269
332	306.8	0.708264	0.70826	0.708262	0.708265	0.708268	0.708269
331	306.9	0.708264	0.70826	0.708262	0.708265	0.708268	0.708269
330	307	0.708265	0.70826	0.708262	0.708265	0.708268	0.708269
329	307.1	0.708265	0.70826	0.708262	0.708265	0.708268	0.708269
328	307.2	0.708265	0.70826	0.708262	0.708265	0.708268	0.708269
327	307.3	0.708265	0.70826	0.708262	0.708265	0.708268	0.708269
326	307.4	0.708266	0.70826	0.708262	0.708265	0.708268	0.708269
325	307.5	0.708266	0.70826	0.708262	0.708265	0.708268	0.708269
324	307.6	0.708266	0.70826	0.708262	0.708265	0.708268	0.708269
323	307.7	0.708267	0.70826	0.708262	0.708265	0.708268	0.708269
322	307.8	0.708267	0.70826	0.708262	0.708265	0.708268	0.708269
321	307.9	0.708267	0.70826	0.708262	0.708265	0.708268	0.708269
320	308	0.708268	0.70826	0.708262	0.708265	0.708268	0.708269
319	308.1	0.708268	0.70826	0.708262	0.708265	0.708268	0.708269
318	308.2	0.708269	0.70826	0.708262	0.708265	0.708268	0.708269
317	308.3	0.708269	0.708261	0.708262	0.708265	0.708268	0.70827
316	308.4	0.70827	0.708261	0.708263	0.708269	0.708277	0.708279
315	308.5	0.708271	0.70827	0.708271	0.708275	0.708278	0.708279
314	308.6	0.708271	0.70827	0.708272	0.708275	0.708278	0.708279
313	308.7	0.708272	0.70827	0.708272	0.708275	0.708278	0.708279
312	308.8	0.708273	0.70827	0.708272	0.708275	0.708278	0.708279
311	308.9	0.708273	0.70827	0.708272	0.708275	0.708278	0.708279
310	309	0.708274	0.70827	0.708272	0.708275	0.708278	0.708279
309	309.1	0.708275	0.70827	0.708272	0.708275	0.708278	0.708279
308	309.2	0.708276	0.70827	0.708272	0.708275	0.708278	0.708279
307	309.3	0.708277	0.70827	0.708272	0.708275	0.708278	0.708279
306	309.4	0.708278	0.708271	0.708272	0.708275	0.708278	0.70828
305	309.5	0.708279	0.708271	0.708272	0.708275	0.708279	0.70828
304	309.6	0.70828	0.708271	0.708272	0.708277	0.708285	0.708288
303	309.7	0.708281	0.708273	0.708279	0.708284	0.708288	0.708289
302	309.8	0.708282	0.70828	0.708281	0.708285	0.708288	0.708289
301	309.9	0.708283	0.70828	0.708282	0.708285	0.708288	0.708289
300	310	0.708284	0.70828	0.708282	0.708285	0.708288	0.708289
299	310.1	0.708285	0.70828	0.708282	0.708285	0.708288	0.708289
298	310.2	0.708286	0.708281	0.708282	0.708285	0.708288	0.70829
297	310.3	0.708288	0.708281	0.708282	0.708285	0.708288	0.70829
296	310.4	0.708289	0.708281	0.708282	0.708286	0.70829	0.708297
295	310.5	0.70829	0.708281	0.708284	0.708291	0.708297	0.708299
294	310.6	0.708291	0.708284	0.70829	0.708294	0.708298	0.708299
293	310.7	0.708293	0.70829	0.708292	0.708295	0.708298	0.708299
292	310.8	0.708294	0.70829	0.708292	0.708295	0.708298	0.708299
291	310.9	0.708295	0.708291	0.708292	0.708295	0.708298	0.7083
290	311	0.708297	0.708291	0.708292	0.708295	0.708298	0.7083
289	311.1	0.708298	0.708291	0.708292	0.708296	0.7083	0.708306
288	311.2	0.7083	0.708291	0.708293	0.708299	0.708306	0.708309
287	311.3	0.708301	0.708292	0.708297	0.708303	0.708308	0.708309
286	311.4	0.708303	0.708298	0.708301	0.708305	0.708308	0.708309
285	311.5	0.708304	0.7083	0.708302	0.708305	0.708308	0.70831
284	311.6	0.708306	0.7083	0.708302	0.708305	0.708308	0.70831
283	311.7	0.708307	0.708301	0.708302	0.708305	0.708309	0.708311
282	311.8	0.708308	0.708301	0.708302	0.708306	0.708313	0.708318
281	311.9	0.70831	0.708301	0.708303	0.70831	0.708317	0.708319
280	312	0.708311	0.708302	0.708307	0.708313	0.708318	0.708319
279	312.1	0.708313	0.708306	0.708311	0.708315	0.708318	0.708319
278	312.2	0.708314	0.70831	0.708311	0.708315	0.708318	0.70832
277	312.3	0.708316	0.70831	0.708312	0.708315	0.708319	0.70832
276	312.4	0.708317	0.708311	0.708312	0.708316	0.70832	0.708326
275	312.5	0.708319	0.708311	0.708312	0.708317	0.708325	0.708328
274	312.6	0.70832	0.708311	0.708313	0.70832	0.708327	0.708329
273	312.7	0.708322	0.708312	0.708316	0.708323	0.708328	0.708329
272	312.8	0.708323	0.708314	0.70832	0.708324	0.708328	0.708329
271	312.9	0.708324	0.708319	0.708321	0.708325	0.708328	0.70833
270	313	0.708326	0.70832	0.708322	0.708325	0.708329	0.708332
269	313.1	0.708327	0.708321	0.708322	0.708326	0.70833	0.708336
268	313.2	0.708328	0.708321	0.708322	0.708327	0.708334	0.708338
267	313.3	0.708329	0.708321	0.708323	0.708329	0.708336	0.708339
266	313.4	0.708331	0.708321	0.708324	0.708331	0.708337	0.708339
265	313.5	0.708332	0.708322	0.708326	0.708333	0.708338	0.708339
264	313.6	0.708333	0.708323	0.708329	0.708334	0.708338	0.70834
263	313.7	0.708334	0.708325	0.708331	0.708335	0.708339	0.70834
262	313.8	0.708335	0.708327	0.708331	0.708335	0.708339	0.708344
261	313.9	0.708336	0.70833	0.708331	0.708336	0.70834	0.708346
260	314	0.708337	0.70833	0.708332	0.708336	0.708342	0.708348
259	314.1	0.708338	0.708331	0.708332	0.708337	0.708344	0.708348
258	314.2	0.708339	0.708331	0.708332	0.708338	0.708346	0.708349
257	314.3	0.708339	0.708331	0.708333	0.708339	0.708346	0.708349
256	314.4	0.70834	0.708331	0.708333	0.70834	0.708347	0.708349
255	314.5	0.708341	0.708331	0.708334	0.708341	0.708347	0.708349
254	314.6	0.708341	0.708331	0.708334	0.708342	0.708348	0.70835
253	314.7	0.708342	0.708331	0.708335	0.708343	0.708348	0.70835
252	314.8	0.708342	0.708332	0.708336	0.708343	0.708348	0.70835
251	314.9	0.708343	0.708332	0.708336	0.708343	0.708348	0.70835
250	315	0.708343	0.708332	0.708336	0.708344	0.708349	0.708352
249	315.1	0.708343	0.708332	0.708337	0.708344	0.708349	0.708353
248	315.2	0.708343	0.708332	0.708337	0.708344	0.708349	0.708353
247	315.3	0.708343	0.708332	0.708337	0.708344	0.708349	0.708354
246	315.4	0.708343	0.708332	0.708336	0.708344	0.708349	0.708354
245	315.5	0.708343	0.708332	0.708336	0.708344	0.708349	0.708354
244	315.6	0.708343	0.708332	0.708336	0.708343	0.708349	0.708354
243	315.7	0.708342	0.708331	0.708335	0.708343	0.708349	0.708353
242	315.8	0.708342	0.708331	0.708334	0.708342	0.708348	0.708353
241	315.9	0.708341	0.708331	0.708334	0.708342	0.708348	0.708352
240	316	0.708341	0.708331	0.708333	0.708341	0.708348	0.70835
239	316.1	0.70834	0.70833	0.708333	0.70834	0.708347	0.70835
238	316.2	0.708339	0.708329	0.708332	0.708339	0.708347	0.70835
237	316.3	0.708338	0.708326	0.708331	0.708338	0.708346	0.708349
236	316.4	0.708337	0.708325	0.708331	0.708337	0.708345	0.708349
235	316.5	0.708336	0.708323	0.70833	0.708336	0.708344	0.708348
234	316.6	0.708335	0.708322	0.708328	0.708335	0.708342	0.708348
233	316.7	0.708333	0.708321	0.708325	0.708334	0.70834	0.708347
232	316.8	0.708332	0.708321	0.708324	0.708332	0.708339	0.708345
231	316.9	0.70833	0.708319	0.708323	0.70833	0.708338	0.708343
230	317	0.708329	0.708315	0.708321	0.708328	0.708337	0.70834
229	317.1	0.708327	0.708313	0.70832	0.708327	0.708335	0.708339
228	317.2	0.708325	0.708312	0.708317	0.708325	0.708333	0.708338
227	317.3	0.708323	0.708311	0.708314	0.708323	0.70833	0.708337
226	317.4	0.708321	0.708308	0.708312	0.708321	0.708329	0.708335
225	317.5	0.708318	0.708304	0.708311	0.708318	0.708327	0.708331
224	317.6	0.708316	0.708302	0.708308	0.708316	0.708325	0.708329
223	317.7	0.708314	0.708301	0.708305	0.708314	0.708322	0.708328
222	317.8	0.708311	0.708297	0.708302	0.708311	0.708319	0.708326
221	317.9	0.708308	0.708293	0.7083	0.708308	0.708317	0.708322
220	318	0.708305	0.708291	0.708296	0.708305	0.708315	0.708319
219	318.1	0.708302	0.708288	0.708293	0.708303	0.70831	0.708317
218	318.2	0.708299	0.708284	0.708291	0.708299	0.708308	0.708315
217	318.3	0.708296	0.708281	0.708287	0.708296	0.708306	0.70831
216	318.4	0.708293	0.708277	0.708283	0.708293	0.708301	0.708308
215	318.5	0.708289	0.708273	0.708281	0.708289	0.708298	0.708305
214	318.6	0.708286	0.708271	0.708276	0.708286	0.708296	0.7083
213	318.7	0.708282	0.708266	0.708272	0.708282	0.70829	0.708298
212	318.8	0.708278	0.708262	0.70827	0.708278	0.708288	0.708294
211	318.9	0.708274	0.708259	0.708264	0.708274	0.708284	0.708289
210	319	0.70827	0.708253	0.708261	0.70827	0.708279	0.708287
209	319.1	0.708266	0.708251	0.708256	0.708266	0.708276	0.708282
208	319.2	0.708262	0.708244	0.708252	0.708262	0.70827	0.708278
207	319.3	0.708257	0.708241	0.708247	0.708257	0.708267	0.708274
206	319.4	0.708253	0.708235	0.708242	0.708253	0.708263	0.708269
205	319.5	0.708248	0.708231	0.708239	0.708248	0.708258	0.708266
204	319.6	0.708243	0.708226	0.708233	0.708244	0.708254	0.70826
203	319.7	0.708239	0.708221	0.708229	0.708238	0.708249	0.708256
202	319.8	0.708234	0.708216	0.708223	0.708234	0.708245	0.70825
201	319.9	0.708229	0.708211	0.708219	0.708228	0.708239	0.708247
200	320	0.708224	0.708205	0.708213	0.708224	0.708235	0.70824
199	320.1	0.708218	0.708201	0.708208	0.708218	0.708229	0.708237
198	320.2	0.708213	0.708194	0.708202	0.708213	0.708224	0.70823
197	320.3	0.708208	0.70819	0.708197	0.708207	0.708218	0.708226
196	320.4	0.708202	0.708183	0.708191	0.708202	0.708213	0.708219
195	320.5	0.708196	0.708178	0.708185	0.708196	0.708208	0.708215
194	320.6	0.708191	0.708172	0.70818	0.708191	0.708202	0.708209
193	320.7	0.708185	0.708166	0.708173	0.708185	0.708197	0.708204
192	320.8	0.708179	0.70816	0.708168	0.708179	0.70819	0.708198
191	320.9	0.708173	0.708153	0.708162	0.708173	0.708185	0.708191
190	321	0.708167	0.708148	0.708155	0.708167	0.708179	0.708187
189	321.1	0.708161	0.708142	0.70815	0.708161	0.708173	0.708179
188	321.2	0.708155	0.708135	0.708143	0.708155	0.708167	0.708174
187	321.3	0.708149	0.708129	0.708137	0.708148	0.70816	0.708168
186	321.4	0.708142	0.708122	0.708131	0.708142	0.708155	0.70816
185	321.5	0.708136	0.708115	0.708124	0.708136	0.708148	0.708156
184	321.6	0.708129	0.70811	0.708117	0.708129	0.708141	0.708149
183	321.7	0.708123	0.708102	0.708111	0.708123	0.708135	0.708142
182	321.8	0.708116	0.708095	0.708104	0.708116	0.708128	0.708137
181	321.9	0.70811	0.70809	0.708097	0.70811	0.708122	0.708129
180	322	0.708103	0.708082	0.708091	0.708103	0.708116	0.708123
179	322.1	0.708096	0.708075	0.708084	0.708096	0.708109	0.708117
178	322.2	0.70809	0.708069	0.708077	0.70809	0.708103	0.708109
177	322.3	0.708083	0.708061	0.708071	0.708083	0.708096	0.708103
176	322.4	0.708076	0.708054	0.708063	0.708076	0.708088	0.708097
175	322.5	0.708069	0.708048	0.708056	0.708069	0.708082	0.708089
174	322.6	0.708062	0.708041	0.70805	0.708063	0.708075	0.708082
173	322.7	0.708055	0.708033	0.708043	0.708056	0.708068	0.708077
172	322.8	0.708048	0.708027	0.708035	0.708049	0.708061	0.708069
171	322.9	0.708041	0.708021	0.708029	0.708042	0.708055	0.70806
170	323	0.708034	0.708012	0.708022	0.708035	0.708047	0.708056
169	323.1	0.708027	0.708005	0.708014	0.708028	0.70804	0.708048
168	323.2	0.708021	0.707999	0.708007	0.708021	0.708034	0.70804
167	323.3	0.708014	0.707992	0.708001	0.708014	0.708027	0.708035
166	323.4	0.708007	0.707984	0.707993	0.708007	0.708019	0.708028
165	323.5	0.708	0.707978	0.707986	0.708	0.708013	0.708019
164	323.6	0.707993	0.707971	0.70798	0.707993	0.708006	0.708014
163	323.7	0.707986	0.707963	0.707973	0.707986	0.707999	0.708007
162	323.8	0.707979	0.707956	0.707965	0.707979	0.707992	0.707999
161	323.9	0.707972	0.707951	0.707959	0.707972	0.707985	0.707993
160	324	0.707965	0.707943	0.707952	0.707965	0.707978	0.707987
159	324.1	0.707958	0.707935	0.707945	0.707959	0.707972	0.707979
158	324.2	0.707951	0.70793	0.707939	0.707952	0.707965	0.707972
157	324.3	0.707945	0.707922	0.707931	0.707945	0.707958	0.707966
156	324.4	0.707938	0.707915	0.707924	0.707938	0.707951	0.707959
155	324.5	0.707931	0.70791	0.707919	0.707932	0.707945	0.707952
154	324.6	0.707925	0.707902	0.707911	0.707925	0.707938	0.707947
153	324.7	0.707918	0.707895	0.707905	0.707918	0.707931	0.707939
152	324.8	0.707912	0.707891	0.707899	0.707912	0.707925	0.707932
151	324.9	0.707905	0.707883	0.707892	0.707906	0.707918	0.707927
150	325	0.707899	0.707877	0.707886	0.707899	0.707912	0.707919
149	325.1	0.707893	0.707871	0.70788	0.707893	0.707906	0.707914
148	325.2	0.707887	0.707864	0.707873	0.707887	0.707899	0.707908
147	325.3	0.707881	0.707859	0.707868	0.707881	0.707894	0.7079
146	325.4	0.707875	0.707852	0.707861	0.707875	0.707888	0.707896
145	325.5	0.707869	0.707846	0.707855	0.707869	0.707882	0.707889
144	325.6	0.707863	0.707841	0.70785	0.707863	0.707876	0.707884
143	325.7	0.707857	0.707834	0.707844	0.707857	0.70787	0.707878
142	325.8	0.707851	0.707831	0.707839	0.707852	0.707865	0.707871
141	325.9	0.707846	0.707824	0.707833	0.707846	0.707858	0.707867
140	326	0.707841	0.70782	0.707828	0.707841	0.707854	0.70786
139	326.1	0.707835	0.707813	0.707822	0.707836	0.707848	0.707856
138	326.2	0.70783	0.70781	0.707817	0.707831	0.707843	0.707849
137	326.3	0.707825	0.707803	0.707812	0.707825	0.707838	0.707846
136	326.4	0.70782	0.7078	0.707808	0.707821	0.707833	0.707839
135	326.5	0.707815	0.707794	0.707803	0.707816	0.707828	0.707836
134	326.6	0.707811	0.707791	0.707798	0.707811	0.707824	0.70783
133	326.7	0.707806	0.707785	0.707794	0.707807	0.707818	0.707826
132	326.8	0.707802	0.707782	0.70779	0.707803	0.707815	0.70782
131	326.9	0.707798	0.707777	0.707786	0.707798	0.707809	0.707817
130	327	0.707794	0.707773	0.707782	0.707794	0.707806	0.707813
129	327.1	0.70779	0.707771	0.707778	0.70779	0.707802	0.707808
128	327.2	0.707786	0.707766	0.707774	0.707786	0.707798	0.707806
127	327.3	0.707783	0.707762	0.707771	0.707783	0.707795	0.7078
126	327.4	0.707779	0.707761	0.707767	0.707779	0.707791	0.707798
125	327.5	0.707776	0.707756	0.707764	0.707776	0.707788	0.707795
124	327.6	0.707773	0.707753	0.707762	0.707774	0.707785	0.70779
123	327.7	0.70777	0.707751	0.707759	0.70777	0.707782	0.707788
122	327.8	0.707768	0.70775	0.707756	0.707768	0.707778	0.707786
121	327.9	0.707765	0.707746	0.707754	0.707765	0.707776	0.707783
120	328	0.707763	0.707744	0.707752	0.707763	0.707774	0.707779
119	328.1	0.707761	0.707742	0.70775	0.707761	0.707771	0.707778
118	328.2	0.707759	0.707741	0.707748	0.707759	0.707769	0.707777
117	328.3	0.707757	0.70774	0.707746	0.707757	0.707768	0.707774
116	328.4	0.707755	0.707738	0.707745	0.707756	0.707766	0.707772
115	328.5	0.707754	0.707736	0.707743	0.707754	0.707765	0.707769
114	328.6	0.707753	0.707735	0.707743	0.707753	0.707764	0.707769
113	328.7	0.707752	0.707735	0.707742	0.707752	0.707763	0.707768
112	328.8	0.707751	0.707734	0.707742	0.707752	0.707761	0.707768
111	328.9	0.707751	0.707734	0.707741	0.707751	0.70776	0.707767
110	329	0.707751	0.707734	0.707741	0.707751	0.70776	0.707767
109	329.1	0.707751	0.707734	0.707741	0.707751	0.707759	0.707767
108	329.2	0.707751	0.707735	0.707742	0.707751	0.707759	0.707767
107	329.3	0.707751	0.707735	0.707742	0.707751	0.70776	0.707767
106	329.4	0.707752	0.707736	0.707742	0.707752	0.70776	0.707767
105	329.5	0.707753	0.707739	0.707743	0.707753	0.707761	0.707768
104	329.6	0.707754	0.707741	0.707745	0.707754	0.707763	0.707768
103	329.7	0.707755	0.707741	0.707746	0.707755	0.707764	0.707769
102	329.8	0.707757	0.707742	0.707749	0.707757	0.707766	0.707769
101	329.9	0.707758	0.707744	0.707751	0.707758	0.707767	0.70777
100	330	0.707761	0.707747	0.707752	0.707761	0.707768	0.707773
99	330.1	0.707763	0.707751	0.707754	0.707763	0.70777	0.707777
98	330.2	0.707765	0.707752	0.707757	0.707765	0.707774	0.707778
97	330.3	0.707768	0.707755	0.707761	0.707768	0.707776	0.707779
96	330.4	0.707771	0.70776	0.707763	0.707771	0.707778	0.707782
95	330.5	0.707774	0.707762	0.707766	0.707774	0.707781	0.707787
94	330.6	0.707778	0.707765	0.707771	0.707777	0.707785	0.707789
93	330.7	0.707781	0.707771	0.707774	0.707782	0.707788	0.70779
92	330.8	0.707785	0.707773	0.70778	0.707785	0.707792	0.707797
91	330.9	0.707789	0.70778	0.707783	0.70779	0.707797	0.707799
90	331	0.707794	0.707782	0.707787	0.707794	0.707799	0.707805
89	331.1	0.707799	0.70779	0.707792	0.707798	0.707806	0.707809
88	331.2	0.707804	0.707792	0.707797	0.707804	0.707809	0.707813
87	331.3	0.707809	0.7078	0.707802	0.707808	0.707816	0.707819
86	331.4	0.707814	0.707803	0.70781	0.707814	0.707819	0.707824
85	331.5	0.70782	0.707811	0.707813	0.70782	0.707827	0.707829
84	331.6	0.707826	0.707818	0.707821	0.707825	0.70783	0.707836
83	331.7	0.707832	0.707822	0.707825	0.707833	0.707838	0.707839
82	331.8	0.707838	0.707831	0.707832	0.707837	0.707845	0.707848
81	331.9	0.707845	0.707837	0.707841	0.707845	0.707849	0.707853
80	332	0.707852	0.707842	0.707846	0.707853	0.707858	0.707859
79	332.1	0.707859	0.707851	0.707853	0.707858	0.707866	0.707869
78	332.2	0.707867	0.70786	0.707862	0.707866	0.70787	0.707876
77	332.3	0.707874	0.707866	0.707871	0.707875	0.707878	0.70788
76	332.4	0.707882	0.707872	0.707876	0.707883	0.707888	0.707889
75	332.5	0.70789	0.707881	0.707883	0.70789	0.707897	0.707899
74	332.6	0.707899	0.707891	0.707892	0.707897	0.707905	0.707908
73	332.7	0.707907	0.707901	0.707902	0.707906	0.707912	0.707917
72	332.8	0.707916	0.70791	0.707912	0.707915	0.707919	0.707925
71	332.9	0.707925	0.707919	0.707921	0.707925	0.707929	0.707932
70	333	0.707935	0.707925	0.707931	0.707935	0.707939	0.70794
69	333.1	0.707944	0.707934	0.70794	0.707944	0.707949	0.70795
68	333.2	0.707954	0.707943	0.70795	0.707954	0.707959	0.70796
67	333.3	0.707964	0.707953	0.707959	0.707964	0.707969	0.707971
66	333.4	0.707974	0.707963	0.70797	0.707974	0.707979	0.707983
65	333.5	0.707985	0.707973	0.70798	0.707985	0.707989	0.707996
64	333.6	0.707995	0.707984	0.707991	0.707995	0.708	0.708007
63	333.7	0.708006	0.707995	0.708001	0.708006	0.708013	0.708018
62	333.8	0.708018	0.708007	0.708011	0.708017	0.708025	0.708029
61	333.9	0.708029	0.70802	0.708022	0.708029	0.708037	0.708039
60	334	0.708041	0.708031	0.708033	0.708041	0.708048	0.70805
59	334.1	0.708052	0.708041	0.708044	0.708053	0.708059	0.708065
58	334.2	0.708064	0.708052	0.708056	0.708064	0.708071	0.708077
57	334.3	0.708077	0.708063	0.70807	0.708077	0.708085	0.708089
56	334.4	0.708089	0.708075	0.708082	0.708089	0.708097	0.708101
55	334.5	0.708102	0.70809	0.708093	0.708102	0.708109	0.708116
54	334.6	0.708115	0.708101	0.708106	0.708115	0.708123	0.708129
53	334.7	0.708128	0.708113	0.70812	0.708128	0.708137	0.708141
52	334.8	0.708141	0.708125	0.708132	0.708141	0.708149	0.708157
51	334.9	0.708154	0.70814	0.708145	0.708155	0.708164	0.708169
50	335	0.708168	0.708152	0.708159	0.708168	0.708178	0.708184
49	335.1	0.708182	0.708165	0.708172	0.708182	0.708191	0.708198
48	335.2	0.708196	0.70818	0.708185	0.708196	0.708206	0.708213
47	335.3	0.70821	0.708192	0.7082	0.70821	0.70822	0.708227
46	335.4	0.708225	0.708207	0.708213	0.708225	0.708236	0.708242
45	335.5	0.708239	0.708221	0.708228	0.708239	0.708249	0.708258
44	335.6	0.708254	0.708234	0.708242	0.708254	0.708265	0.708272
43	335.7	0.708269	0.70825	0.708257	0.708268	0.708279	0.708288
42	335.8	0.708284	0.708263	0.708272	0.708284	0.708296	0.708303
41	335.9	0.708299	0.708279	0.708286	0.708299	0.70831	0.708318
40	336	0.708314	0.708293	0.708301	0.708314	0.708327	0.708336
39	336.1	0.70833	0.708308	0.708317	0.70833	0.708343	0.70835
38	336.2	0.708345	0.708322	0.708332	0.708345	0.708358	0.708367
37	336.3	0.708361	0.708338	0.708348	0.708361	0.708375	0.708384
36	336.4	0.708377	0.708353	0.708363	0.708377	0.70839	0.708399
35	336.5	0.708393	0.70837	0.708379	0.708393	0.708407	0.708417
34	336.6	0.708409	0.708385	0.708395	0.708409	0.708424	0.708434
33	336.7	0.708425	0.708401	0.708411	0.708425	0.708439	0.708449
32	336.8	0.708442	0.708416	0.708427	0.708442	0.708457	0.708467
31	336.9	0.708458	0.708432	0.708443	0.708459	0.708474	0.708484
30	337	0.708475	0.708448	0.708459	0.708475	0.70849	0.7085
29	337.1	0.708492	0.708464	0.708476	0.708492	0.708507	0.708518
28	337.2	0.708509	0.708481	0.708492	0.708509	0.708525	0.708536
27	337.3	0.708526	0.708497	0.708509	0.708526	0.708543	0.708554
26	337.4	0.708543	0.708513	0.708525	0.708543	0.708559	0.70857
25	337.5	0.70856	0.70853	0.708542	0.70856	0.708577	0.708588
24	337.6	0.708577	0.708547	0.708559	0.708577	0.708595	0.708606
23	337.7	0.708594	0.708563	0.708576	0.708594	0.708613	0.708625
22	337.8	0.708611	0.708581	0.708593	0.708612	0.708629	0.708643
21	337.9	0.708629	0.708597	0.70861	0.708629	0.708647	0.708659
20	338	0.708646	0.708613	0.708627	0.708646	0.708665	0.708678
19	338.1	0.708664	0.708631	0.708644	0.708664	0.708683	0.708696
18	338.2	0.708682	0.708648	0.708662	0.708682	0.708701	0.708715
17	338.3	0.708699	0.708665	0.708679	0.708699	0.708719	0.708733
16	338.4	0.708717	0.708681	0.708696	0.708717	0.708737	0.70875
15	338.5	0.708735	0.7087	0.708714	0.708734	0.708755	0.708769
14	338.6	0.708752	0.708716	0.708731	0.708752	0.708774	0.708787
13	338.7	0.70877	0.708733	0.708749	0.70877	0.708791	0.708806
12	338.8	0.708788	0.708751	0.708766	0.708788	0.708809	0.708825
11	338.9	0.708806	0.708769	0.708784	0.708806	0.708827	0.708843
10	339	0.708823	0.708785	0.708801	0.708823	0.708846	0.708861
9	339.1	0.708841	0.708802	0.708819	0.708841	0.708864	0.708879
8	339.2	0.708859	0.708821	0.708836	0.708859	0.708882	0.708898
7	339.3	0.708877	0.708837	0.708854	0.708877	0.7089	0.708916
6	339.4	0.708895	0.708854	0.708871	0.708895	0.708918	0.708935
5	339.5	0.708913	0.708871	0.708889	0.708912	0.708937	0.708953
4	339.6	0.70893	0.70889	0.708907	0.70893	0.708955	0.708972
3	339.7	0.708948	0.708906	0.708924	0.708948	0.708973	0.70899
2	339.8	0.708966	0.708923	0.708941	0.708966	0.70899	0.709008
1	339.9	0.708984	0.708941	0.708958	0.708984	0.709009	0.709026
0	340	0.709001	0.708957	0.708976	0.709001	0.709027	0.709045

[truncated: 3 more sheets: d18O, d13C, temperature]
